# Supplementary material
Source: PubMed Central journal article supplement (PMC10842623)

# **Iron(III)-based metalloradical catalysis for asymmetric cyclopropanation via a stepwise radical mechanism**

---

In the format provided by the authors and unedited

---

# Table of Contents

|                                                                                                             |             |
|-------------------------------------------------------------------------------------------------------------|-------------|
| <b>1. General Information.....</b>                                                                          | <b>S2</b>   |
| <b>2. Selected Examples of Important Compounds Containing CF<sub>3</sub>-Substituted Cyclopropane .....</b> | <b>S3</b>   |
| 2.1. Figure S1: Bioactive Natural Products and Pharmaceuticals.....                                         | S3          |
| <b>3. Synthesis of Catalyst.....</b>                                                                        | <b>S4</b>   |
| 3.1. General Procedure for Preparation of [Mn(Por)Cl] .....                                                 | S4          |
| 3.2. General Procedure for Preparation of [Fe(Por)Cl].....                                                  | S5          |
| <b>4. Synthesis of Substrates .....</b>                                                                     | <b>S6</b>   |
| 4.1. General Procedure for Preparation of Trifluoroacetaldehyde <i>N</i> -Trisylhydrazone.....              | S6          |
| 4.2. General Procedure for Preparation of Pentafluoropropionaldehyde <i>N</i> -Trisylhydrazone.....         | S7          |
| <b>5. Synthesis of Products.....</b>                                                                        | <b>S8</b>   |
| 5.1. General Procedure for [Fe(Por)Cl]-Catalyzed Cyclopropanation .....                                     | S8          |
| <b>6. Mechanistic Studies .....</b>                                                                         | <b>S25</b>  |
| 6.1. Comparative Studies on Catalytic Reactions under Inert and Air Atmospheres .....                       | S25         |
| 6.2. Comparative Studies on Catalytic Reactions with Ligand.....                                            | S26         |
| 6.3. Detection of Radical Intermediates by HRMS .....                                                       | S28         |
| 6.4. Determination of Magnetic Susceptibility in [Fe(Por)Cl] .....                                          | S30         |
| 6.5. Determination of Iron Spin States in [Fe(Por)Cl] by EPR.....                                           | S33         |
| 6.6. Radical Trapping by EPR .....                                                                          | S34         |
| 6.7. Radical Trapping by H-Atom Sources.....                                                                | S44         |
| 6.8. Radical Trapping by TEMPO .....                                                                        | S45         |
| 6.9. Probing of Radical Intermediates by Reactions of $\beta$ -Deuterostyrenes .....                        | S46         |
| 6.10. Reaction Progress Monitored by NMR Spectroscopy .....                                                 | S54         |
| 6.11. Determination of Kinetic Orders in the Catalytic Reaction.....                                        | S57         |
| <b>7. X-ray Crystallography .....</b>                                                                       | <b>S59</b>  |
| <b>8. DFT Calculations .....</b>                                                                            | <b>S136</b> |
| <b>9. References.....</b>                                                                                   | <b>S155</b> |
| <b>10. NMR/HPLC Spectra .....</b>                                                                           | <b>S156</b> |

## 1. General Information

All catalytic reactions were performed in anhydrous solvents under a N<sub>2</sub> atmosphere in an oven-dried glassware following standard Schlenk techniques. Thin layer chromatography was performed on Merck TLC plates (silica gel 60 F254). Flash column chromatography was performed with ICN silica gel (60 Å, 230-400 mesh, 32-63 μm). NMR spectra were acquired using Varian Inova 400 MHz, Bruker 500 MHz and Varian 600 MHz spectrometer. Spectra were processed using MNova software (Mestrelab). Chemical shifts are reported in parts per million (ppm), coupling constants (*J*) in Hz and are calibrated to residual protonated solvent. Infrared spectra of neat samples were acquired using a Nicolet Avatar 320 spectrometer with a Smart Miracle accessory. Optical rotations were measured on a Rudolph Research Analytical AUTOPOL® IV digital polarimeter. HPLC measurements were carried out on a Shimadzu HPLC system with Chiralcel OJ-H, OD-H, IA, IB, IC, IF and (*R,R*)-Whelk-O1 columns. High-resolution mass spectrometry (DART and ESI) was performed at the Mass Spectrometry Facility, Boston College, Chestnut Hill, MA. The X-ray diffraction data were collected using Bruker-AXS SMART-APEXII CCD diffractometer. Activated 4Å molecular sieves were purchased from Sigma-Aldrich. All reagents were purchased either from Aldrich, Alfa Aesar, Acros, Ak Sci, Oakwood Chemicals, Strem Chemicals or TCI and were used without further purification.

## 2. Selected Examples of Important Compounds Containing CF<sub>3</sub>-Substituted Cyclopropane

### 2.1. Figure S1: Bioactive Natural Products and Pharmaceuticals

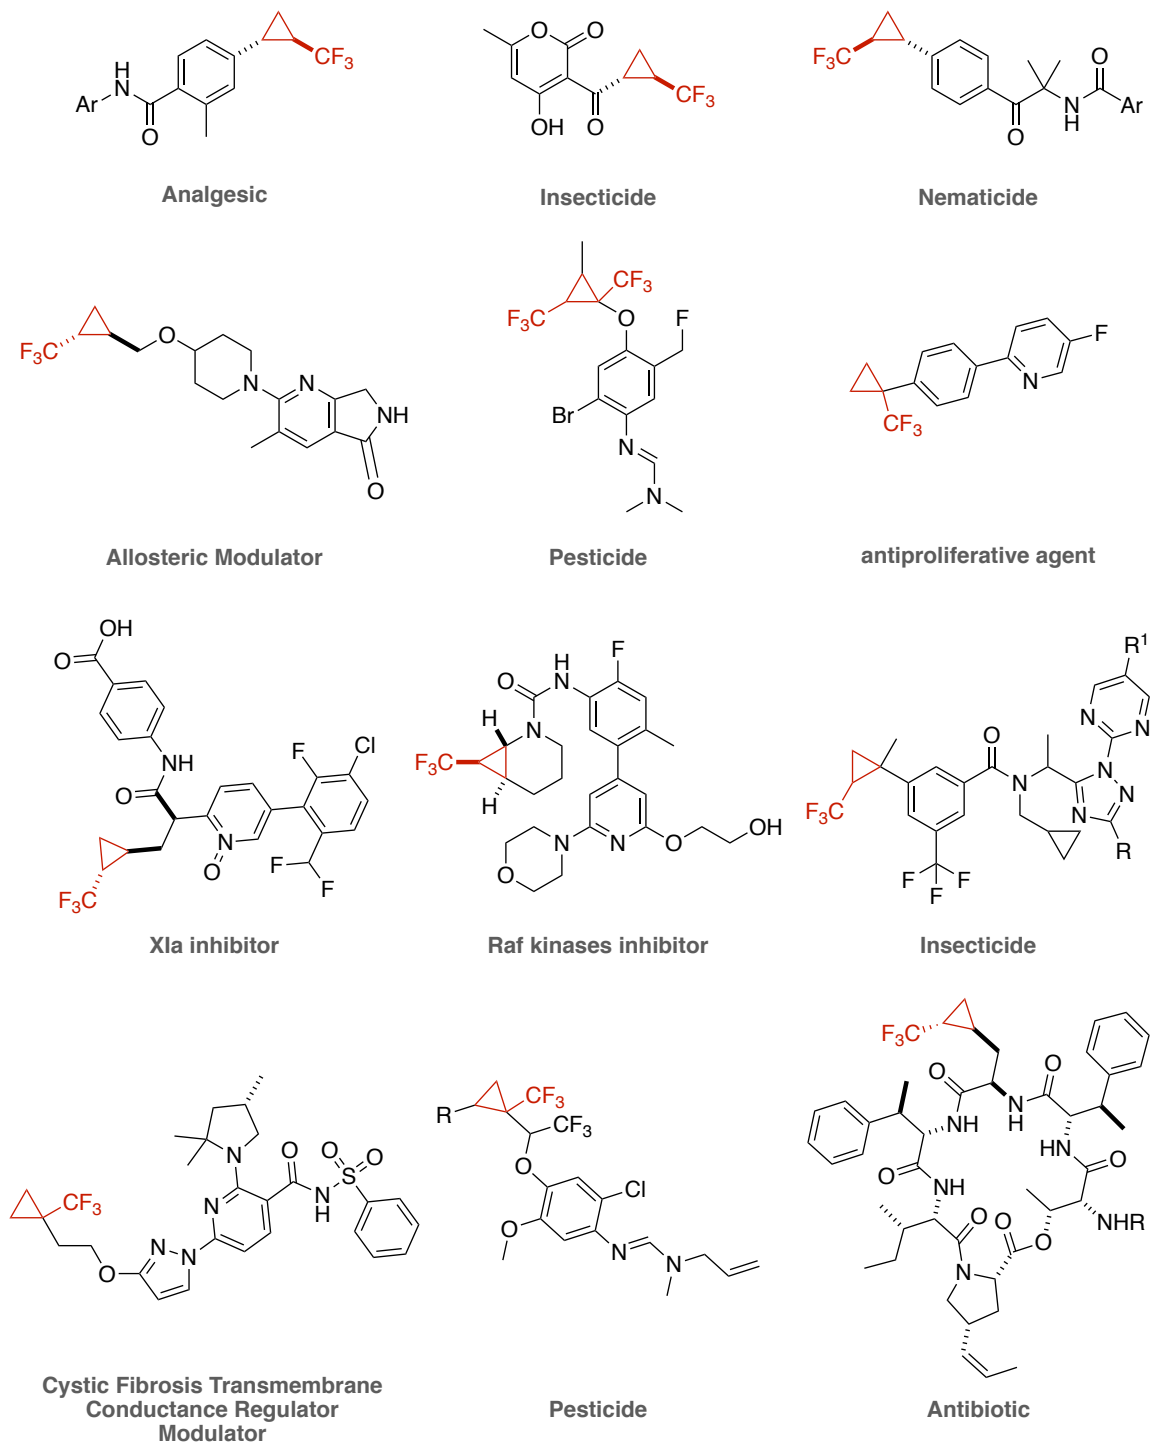

### 3. Synthesis of Catalyst

#### 3.1. General Procedure for Preparation of [Mn(Por)Cl]

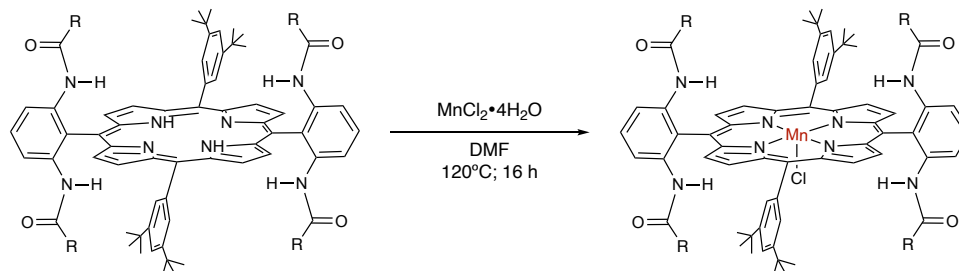

An oven-dried Schlenk tube was charged with 1.0 equivalent of porphyrin and 16.0 equivalents of  $\text{MnCl}_2 \cdot 4\text{H}_2\text{O}$ . The Schlenk tube was then evacuated and back filled with nitrogen three times. The Teflon screw cap was replaced with a rubber septum, and DMF was added. The Schlenk tube was then purged with nitrogen for 30 sec and the rubber septum was replaced with a Teflon screw cap. The mixture was stirred at 120 °C. After 16 h, the reaction mixture was extracted with ethyl acetate and 1N HCl for two times, then the organic layer was washed by brine. The combined ethyl acetate layer was dried with  $\text{Na}_2\text{SO}_4$ , filtered and the solvent was concentrated *in vacuo*. The residue was purified via a flash chromatography to afford the compound.

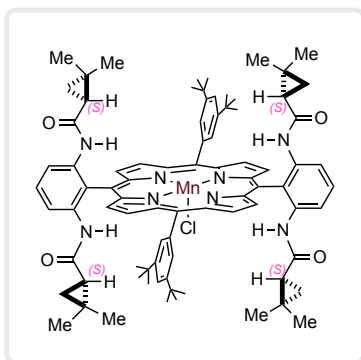

#### [Mn(3,5-Di-t-Bu-ChenPhyrin)Cl] ([Mn(P2)Cl])

IR (neat,  $\text{cm}^{-1}$ ): 2962, 2870, 1695, 1585, 1465, 1276, 1163, 1009.  
HRMS-(ESI) calculated for  $\text{C}_{84}\text{H}_{96}\text{ClMnN}_8\text{O}_4\text{Na}$   $[\text{M}+\text{Na}]^+$ : 1393.6521, found 1393.6500. UV-Vis ( $\text{CH}_2\text{Cl}_2$ ),  $\lambda_{\text{max}}$  nm (log  $\epsilon$ ): 376(4.84), 401(4.78), 481(5.22), 586(4.13), 621(4.06).

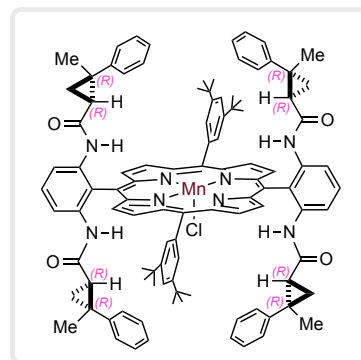

#### [Mn(3,5-Di-t-Bu-QingPhyrin)Cl] ([Mn(P3)Cl])

IR (neat,  $\text{cm}^{-1}$ ): 2961, 2870, 1692, 1585, 1466, 1275, 1163, 1009.  
HRMS-(ESI) calculated for  $\text{C}_{104}\text{H}_{104}\text{ClMnN}_8\text{O}_4\text{Na}$   $[\text{M}+\text{Na}]^+$ : 1641.7147, found 1641.7117. UV-Vis ( $\text{CH}_2\text{Cl}_2$ ),  $\lambda_{\text{max}}$  nm (log  $\epsilon$ ): 377(4.75), 401(4.69), 483(5.12), 589(4.04), 623(3.97).

### 3.2. General Procedure for Preparation of [Fe(Por)Cl]

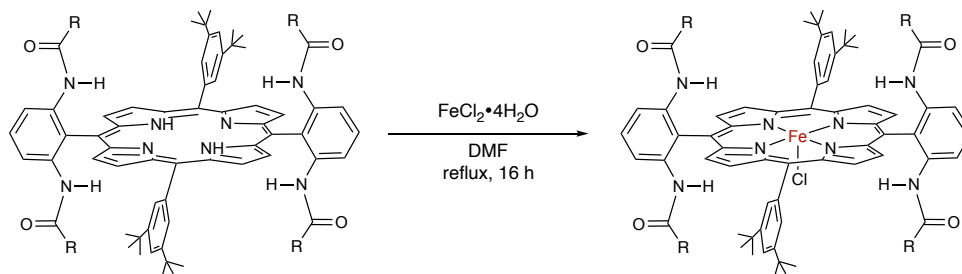

A round bottom flask was charged with 1.0 equivalent of porphyrin, 16.0 equivalents of FeCl<sub>2</sub>·4H<sub>2</sub>O and DMF as the solvent. The mixture was stirred under reflux for 16 h. After the reaction completed, the reaction mixture was extracted with ethyl acetate and 1N HCl for two times, then the organic layer was washed by brine. The combined ethyl acetate layer was dried with Na<sub>2</sub>SO<sub>4</sub>, filtered and the solvent was concentrated *in vacuo*. The residue was purified by filtering through a plug of silica and then concentrated *in vacuo*.

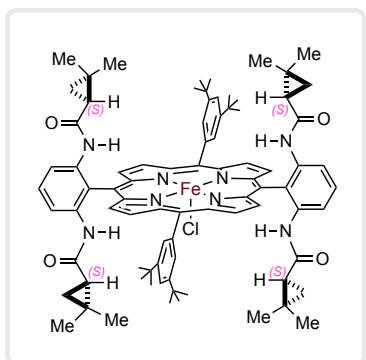

#### [Fe(3,5-Di-*t*Bu-ChenPhyrin)Cl] ([Fe(P2)Cl])

IR (neat, cm<sup>-1</sup>): 3412, 2961, 2869, 1698, 1588, 1465, 1282, 999.  
HRMS-(ESI) calculated for C<sub>84</sub>H<sub>96</sub>ClFeN<sub>8</sub>O<sub>4</sub>Na [M+Na]<sup>+</sup>: 1394.6490, found 1394.6467. UV-Vis (CH<sub>2</sub>Cl<sub>2</sub>), λ<sub>max</sub> nm (log ε): 377(4.74), 421(5.06), 512(4.15), 666(3.58). The structure was characterized by X-ray crystallography.

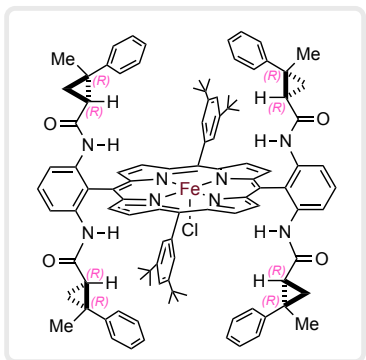

#### [Fe(3,5-Di-*t*Bu-QingPhyrin)Cl] ([Fe(P3)Cl])

IR (neat, cm<sup>-1</sup>): 3416, 2961, 2870, 1697, 1587, 1466, 1261, 999.  
HRMS-(ESI) calculated for C<sub>104</sub>H<sub>104</sub>ClFeN<sub>8</sub>O<sub>4</sub>Na [M+Na]<sup>+</sup>: 1642.7116, found 1642.7087. UV-Vis (CH<sub>2</sub>Cl<sub>2</sub>), λ<sub>max</sub> nm (log ε): 373(4.68), 423(5.03), 511(4.13), 665(3.61). Magnetic susceptibility μ<sub>eff</sub> = 5.68 μB (SQUID, solid, 6–300K); 5.62 μB (Evans, CDCl<sub>3</sub>, 500 MHz, 298K).

## 4. Synthesis of Substrates

### 4.1. General Procedure for Preparation of Trifluoroacetaldehyde *N*-Trisylhydrazone

A 100 mL round-bottom flask was charged with 2,4,6-triisopropylbenzenesulfonyl hydrazide (2.0 g, 6.7 mmol) followed by addition of 50 mL of DCE. Once the solid was dissolved, trifluoroacetaldehyde hydrate (1.5 equiv, 10.1 mmol) and acetic acid (10 drops) were added dropwise at 0 degrees Celsius. After the reaction was stirred for 3 h,  $\text{BF}_3 \cdot \text{OEt}_2$  (0.5 equiv, 3.4 mmol) was added dropwise and the reaction was stirred overnight at room temperature. When the reaction was completed, the solvent was removed directly under reduced pressure, and the residue as a solid was triturated with hexanes to give the desired product.

#### 2,2,2-Trifluoroacetaldehyde 2,4,6-triisopropylbenzenesulfonyl hydrazone (1)

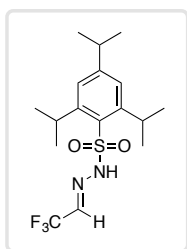

Yield: 88%. White solid.  $^1\text{H}$  NMR (500 MHz,  $\text{DMSO}-d_6$ )  $\delta$  12.73 (s, 1H), 7.44 (q,  $J = 4.0$  Hz, 1H), 7.25 (d,  $J = 1.5$  Hz, 2H), 4.07 ((hept,  $J = 6.6$  Hz, 2H), 2.91 (hept,  $J = 6.9$  Hz, 1H), 1.18 (d,  $J = 6.9$  Hz, 6H), 1.16 (d,  $J = 6.8$  Hz, 12H).  $^{13}\text{C}$  NMR (151 MHz,  $\text{DMSO}-d_6$ )  $\delta$  153.3, 150.5, 131.3, 130.5 (q,  $J = 37.9, 37.5$  Hz), 123.7, 119.9 (q,  $J = 270.9$  Hz), 33.3, 29.1, 24.4, 23.2.  $^{19}\text{F}$  NMR (470 MHz,  $\text{DMSO}-d_6$ )  $\delta$  -66.20 (d,  $J = 4.0$  Hz). IR (neat,  $\text{cm}^{-1}$ ): 3169, 2971, 1601, 1376, 1179, 1136, 1088, 950. HRMS-(DART+) calculated for  $\text{C}_{17}\text{H}_{26}\text{F}_3\text{N}_2\text{O}_2\text{S}$   $[\text{M}+\text{H}]^+$ : 379.1662, found: 379.1658. The structure was characterized by X-ray crystallography.

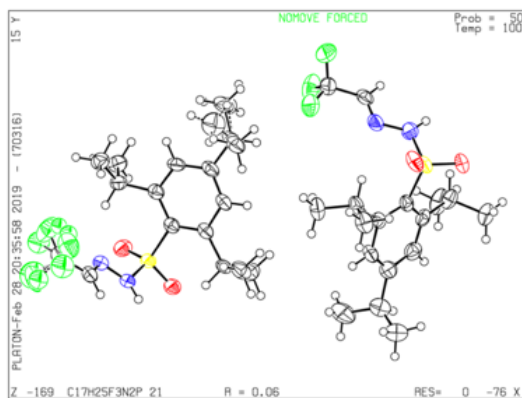

## 4.2. General Procedure for Preparation of Pentafluoropropionaldehyde *N*-Trisylhydrazone

A 100 mL round-bottom flask was charged with 2,4,6-triisopropylbenzenesulfonyl hydrazide (2.0 g, 6.7 mmol) followed by addition of 50 mL of DCE. Once the solid was dissolved, pentafluoropropionaldehyde hydrate (1.5 equiv, 10.1 mmol) and acetic acid (10 drops) were added dropwise at 0 degrees Celsius. After the reaction was stirred for 3 h,  $\text{BF}_3 \cdot \text{OEt}_2$  (0.5 equiv, 3.4 mmol) was added dropwise and the reaction was stirred overnight at room temperature. When the reaction was completed, the solvent was removed directly under reduced pressure, and the residue as a solid was triturated with hexanes to give the desired product.

### 2,2,3,3,3-Pentafluoropropionaldehyde 2,4,6-triisopropylbenzenesulfonyl hydrazone (4a)

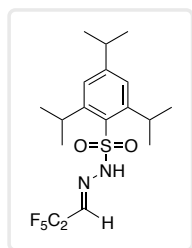

Yield: 82%. White solid.  $^1\text{H}$  NMR (500 MHz,  $\text{DMSO}-d_6$ )  $\delta$  12.88 (s, 1H), 7.41 (t,  $J$  = 6.1 Hz, 1H), 7.26 (s, 2H), 4.05 (hept,  $J$  = 6.8 Hz, 2H), 2.92 (hept,  $J$  = 6.9 Hz, 1H), 1.19 (d,  $J$  = 6.9 Hz, 6H), 1.17 (d,  $J$  = 6.7 Hz, 12H).  $^{13}\text{C}$  NMR (126 MHz,  $\text{DMSO}-d_6$ )  $\delta$  153.5, 150.6, 131.1, 129.4 (t,  $J$  = 28.8 Hz), 123.7, 118.0 (qt,  $J$  = 286.7, 37.7 Hz), 109.7 (tq,  $J$  = 250.7, 37.7 Hz), 33.4, 29.2, 24.4, 23.3.  $^{19}\text{F}$  NMR (471 MHz,  $\text{DMSO}-d_6$ )  $\delta$  -83.01, -115.35 (d,  $J$  = 7.0 Hz). IR (neat,  $\text{cm}^{-1}$ ): 3164, 2964, 1600, 1319, 1264, 1205, 1171, 1095.

HRMS-(DART+) calculated for  $\text{C}_{18}\text{H}_{29}\text{F}_5\text{N}_3\text{O}_2\text{S}$   $[\text{M}+\text{NH}_4]^+$ : 446.1895, found: 446.1889.



## 5. Synthesis of Products

### 5.1. General Procedure for [Fe(Por)Cl]-Catalyzed Cyclopropanation

An oven-dried Schlenk tube was charged with 1.0 equivalent of olefin (0.1 mmol), 1.2 equivalents of hydrazone (0.12 mmol), [Fe(Por)Cl] (2 mol %) and 2.4 equivalents of Cs<sub>2</sub>CO<sub>3</sub> (0.24 mmol). The Schlenk tube was then evacuated and back filled with nitrogen three times. The Teflon screw cap was replaced with a rubber septum, and hexanes (1 mL) was added. The Schlenk tube was then purged with nitrogen for 30 sec and the rubber septum was replaced with a Teflon screw cap. The mixture was stirred at 4 °C. After 20 h, the reaction mixture was filtered through a plug of silica and then concentrated *in vacuo*. The residue was purified via a flash chromatography to afford the compound as a mixture of *trans/cis* diastereomers. (*The modification of reaction conditions is substrate-dependent, the details mentioned in the main text Table 3.*)

#### ((1*R*,2*R*)-2-(Trifluoromethyl)cyclopropyl)benzene (3a)

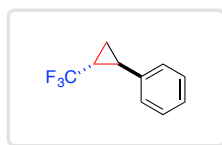

Yield: 92%. Colorless oil. Isolated as a mixture of diastereomers *trans/cis*: 98/2.  $[\alpha]_D^{20} = (-)-37.99$  ( $c = 0.1$ , CHCl<sub>3</sub>). <sup>1</sup>H NMR (500 MHz, Chloroform-*d*)  $\delta$  7.30 (t,  $J = 7.1$  Hz, 2H), 7.24 – 7.20 (m, 1H), 7.12 (d,  $J = 7.3$  Hz, 2H), 2.36 (dt,  $J = 10.0, 5.5$  Hz, 1H), 1.80 (dt,  $J = 14.4, 6.3$  Hz, 1H), 1.36 (dt,  $J = 11.1, 5.6$  Hz, 1H), 1.17 (q,  $J = 7.0$  Hz, 1H). <sup>13</sup>C NMR (151 MHz, Chloroform-*d*)  $\delta$  141.7, 131.2, 129.4, 129.1, 127.6 (q,  $J = 270.9$  Hz) 25.6 (q,  $J = 36.9$  Hz), 22.2 (q,  $J = 2.7$  Hz), 13.4 (q,  $J = 2.5$  Hz). <sup>19</sup>F NMR (564 MHz, Chloroform-*d*)  $\delta$  -66.80 (d,  $J = 6.8$  Hz). IR (neat, cm<sup>-1</sup>): 2981, 2888, 1421, 1269, 1144, 906, 731. HPLC analysis *trans*-isomer: *e.e.* = 91%. OJ-H (0.1% isopropanol: 99.9% hexane, 0.8 ml/min):  $t_{major} = 7.6$  min,  $t_{minor} = 8.4$  min. HRMS-(DART+) calculated for C<sub>10</sub>H<sub>10</sub>F<sub>3</sub> [M+H]<sup>+</sup>: 187.0729, found: 187.0726.

#### 1-Methyl-2-((1*R*,2*R*)-2-(trifluoromethyl)cyclopropyl)benzene (3b)

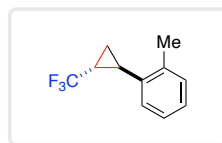

Yield: 95%. Colorless oil. Isolated as a mixture of diastereomers *trans/cis*: 99/1.  $[\alpha]_D^{20} = (-)-78.97$  ( $c = 0.2$ , CHCl<sub>3</sub>). <sup>1</sup>H NMR (500 MHz, Chloroform-*d*)  $\delta$  7.20 – 7.16 (m, 2H), 7.15 (dd,  $J = 6.5, 3.9$  Hz, 1H), 7.02 (d,  $J = 6.9$  Hz, 1H), 2.42 (s, 3H), 2.38 – 2.33 (m, 1H), 1.78 – 1.64 (m, 1H), 1.35 (dt,  $J = 10.1, 5.4$  Hz, 1H), 1.22 – 1.16 (m, 1H). <sup>13</sup>C NMR (151 MHz, Chloroform-*d*)  $\delta$  138.2, 136.8, 130.2, 127.2, 126.4 (q,  $J = 271.0$  Hz), 126.3, 126.1, 21.9 (q,  $J = 36.6$  Hz), 19.6, 18.3 (q,  $J = 2.8$  Hz), 9.2 (q,  $J = 2.7$  Hz). <sup>19</sup>F NMR (470 MHz, Chloroform-*d*)  $\delta$  -66.45 (d,  $J = 6.7$  Hz). IR (neat, cm<sup>-1</sup>): 3027, 2953, 1418, 1268, 1147, 906, 731. HPLC analysis *trans*-isomer: *e.e.* = 95%. OD-H (0.1% isopropanol: 99.9% hexane, 0.8 ml/min):  $t_{minor} = 8.7$  min,  $t_{major} = 9.3$  min. HRMS-(DART+) calculated for C<sub>11</sub>H<sub>11</sub>F<sub>3</sub> [M]<sup>+</sup>: 200.0807, found: 200.0802.

### 1-Methoxy-4-((1*R*,2*R*)-2-(trifluoromethyl)cyclopropyl)benzene (3c)

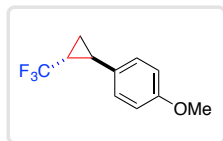

Yield: 81%. Colorless oil. Isolated as a mixture of diastereomers *trans/cis*: 95/5.  $[\alpha]_D^{20} = (-)-74.98$  ( $c = 0.4$ ,  $\text{CHCl}_3$ ).  $^1\text{H NMR}$  (600 MHz, Chloroform-*d*)  $\delta$  7.06 (d,  $J = 8.4$  Hz, 2H), 6.84 (d,  $J = 7.5$  Hz, 2H), 3.79 (s, 3H), 2.32 (dt,  $J = 10.3, 5.5$  Hz, 1H), 1.72 (dq,  $J = 13.4, 6.8$  Hz, 1H), 1.32 (dt,  $J = 10.4, 5.5$  Hz, 1H), 1.11 (dt,  $J = 8.6, 6.1$  Hz, 1H).  $^{13}\text{C NMR}$  (151 MHz, Chloroform-*d*)  $\delta$  158.6, 131.1, 127.9, 126.2 (q,  $J = 271.0$  Hz), 114.2, 55.5, 22.8 (q,  $J = 36.6$  Hz), 19.1 (q,  $J = 2.8$  Hz), 10.6 (q,  $J = 2.7$  Hz).  $^{19}\text{F NMR}$  (564 MHz, Chloroform-*d*)  $\delta$  -66.74 (d,  $J = 6.8$  Hz). IR (neat,  $\text{cm}^{-1}$ ): 2959, 2924, 1518, 1420, 1250, 1139, 737. HPLC analysis *trans*-isomer: *e.e.* = 86%. IB (1% isopropanol: 99% hexane, 0.8 ml/min):  $t_{\text{minor}} = 7.9$  min,  $t_{\text{major}} = 9.4$  min. HRMS-(DART+) calculated for  $\text{C}_{11}\text{H}_{12}\text{F}_3\text{O}$   $[\text{M}+\text{H}]^+$ : 217.0835, found: 217.0826.

### 2-((1*R*,2*R*)-2-(Trifluoromethyl)cyclopropyl)benzonitrile (3d)

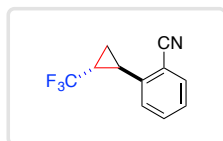

Yield: 96%. Colorless oil. Isolated as a mixture of diastereomers *trans/cis*: 98/2.  $[\alpha]_D^{20} = (-)-50.98$  ( $c = 0.4$ ,  $\text{CHCl}_3$ ).  $^1\text{H NMR}$  (500 MHz, Chloroform-*d*)  $\delta$  7.66 (d,  $J = 7.7$  Hz, 1H), 7.54 (t,  $J = 7.7$  Hz, 1H), 7.35 (t,  $J = 7.6$  Hz, 1H), 7.10 (d,  $J = 8.0$  Hz, 1H), 2.69 (dt,  $J = 10.3, 5.5$  Hz, 1H), 1.95 (dq,  $J = 12.1, 6.1$  Hz, 1H), 1.60 – 1.55 (m, 1H), 1.28 – 1.22 (m, 1H).  $^{13}\text{C NMR}$  (151 MHz, Chloroform-*d*)  $\delta$  142.6, 133.3, 133.2, 127.5, 126.3, 125.5 (q,  $J = 271.4$  Hz), 117.5, 113.8, 22.9 (q,  $J = 37.5$  Hz), 18.4 (q,  $J = 3.1$  Hz), 11.3 (q,  $J = 2.6$  Hz).  $^{19}\text{F NMR}$  (470 MHz, Chloroform-*d*)  $\delta$  -66.90 (d,  $J = 6.2$  Hz). IR (neat,  $\text{cm}^{-1}$ ): 3066, 2226, 1421, 1268, 1146, 909, 762. HPLC analysis *trans*-isomer: *e.e.* = 92%. OJ-H (0.1% isopropanol: 99.9% hexane, 0.8 ml/min):  $t_{\text{major}} = 20.1$  min,  $t_{\text{minor}} = 22.7$  min. HRMS-(DART+) calculated for  $\text{C}_{11}\text{H}_9\text{F}_3\text{N}$   $[\text{M}+\text{H}]^+$ : 212.0682, found: 212.0677.

### 1-Chloro-2-((1*R*,2*R*)-2-(trifluoromethyl)cyclopropyl)benzene (3e)

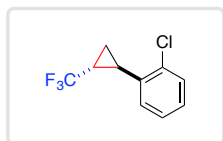

Yield: 99%. Colorless oil. Isolated as a mixture of diastereomers *trans/cis*: 99/1.  $[\alpha]_D^{20} = (-)-76.97$  ( $c = 0.2$ ,  $\text{CHCl}_3$ ).  $^1\text{H NMR}$  (500 MHz, Chloroform-*d*)  $\delta$  7.34 – 7.28 (m, 1H), 7.12 (dd,  $J = 6.2, 2.1$  Hz, 2H), 6.99 – 6.93 (m, 1H), 2.51 (dt,  $J = 10.2, 5.7$  Hz, 1H), 1.72 (dq,  $J = 13.4, 6.4, 5.8$  Hz, 1H), 1.34 (dt,  $J = 10.2, 5.6$  Hz, 1H), 1.11 (q,  $J = 6.3$  Hz, 1H).  $^{13}\text{C NMR}$  (151 MHz, Chloroform-*d*)  $\delta$  136.5, 135.7, 129.7, 128.3, 127.5, 127.0, 126.0 (q,  $J = 271.2$  Hz), 22.3 (q,  $J = 37.2$  Hz), 18.2 (q,  $J = 2.9$  Hz), 9.9 (q,  $J = 2.6$  Hz).  $^{19}\text{F NMR}$  (470 MHz, Chloroform-*d*)  $\delta$  -66.71 (d,  $J = 6.5$  Hz). IR (neat,  $\text{cm}^{-1}$ ): 3063, 2964, 1419, 1267, 1139, 995, 751. HPLC analysis *trans*-isomer: *e.e.* = 94%. OJ-H (100% hexane, 0.4 ml/min):  $t_{\text{major}} = 12.6$  min,  $t_{\text{minor}} = 13.1$  min. HRMS-(DART+) calculated for  $\text{C}_{10}\text{H}_8\text{F}_3\text{Cl}$   $[\text{M}]^+$ : 220.0261, found: 220.0260.

### 1-Chloro-4-((1*R*,2*R*)-2-(trifluoromethyl)cyclopropyl)benzene (3f)

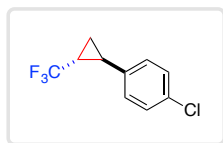

Yield: 83%. Colorless oil. Isolated as a mixture of diastereomers *trans/cis*: 97/3.  $[\alpha]_D^{20} = (-)-66.98$  ( $c = 0.2$ ,  $\text{CHCl}_3$ ).  $^1\text{H NMR}$  (500 MHz, Chloroform-*d*)  $\delta$  7.28 (d,  $J = 2.0$  Hz, 2H), 7.07 (d,  $J = 8.3$  Hz, 2H), 2.34 (dt,  $J = 10.3, 5.4$  Hz, 1H), 1.77 (dq,  $J = 13.3, 6.6, 6.1$  Hz, 1H), 1.39 (dt,  $J = 10.7, 5.6$  Hz, 1H), 1.18 – 1.13 (m, 1H).  $^{13}\text{C NMR}$  (151 MHz, Chloroform-*d*)  $\delta$  137.6, 132.7, 128.9, 128.1, 125.9 (q,  $J = 271.0$  Hz), 23.1 (q,  $J = 37.0$  Hz), 19.2 (q,  $J = 2.9$  Hz), 11.0 (q,  $J = 2.7$  Hz).  $^{19}\text{F NMR}$  (470 MHz, Chloroform-*d*)  $\delta$  -66.87 (d,  $J = 6.6$  Hz). IR (neat,  $\text{cm}^{-1}$ ): 2998, 2948, 1444, 1236, 1149, 907, 732. HPLC analysis *trans*-isomer: *e.e.* = 86%. OD-H (0.1% isopropanol: 99.9% hexane, 0.8 ml/min):  $t_{\text{minor}} = 8.1$  min,  $t_{\text{major}} = 9.2$  min. HRMS-(DART+) calculated for  $\text{C}_{10}\text{H}_9\text{F}_3\text{Cl}$   $[\text{M}+\text{H}]^+$ : 221.0339, found: 211.0337.

### 1-Bromo-2-((1*R*,2*R*)-2-(trifluoromethyl)cyclopropyl)benzene (3g)

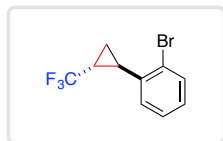

Yield: 98%. Colorless oil. Isolated as a mixture of diastereomers *trans/cis*: 98/2.  $[\alpha]_D^{20} = (-)-45.98$  ( $c = 0.2$ ,  $\text{CHCl}_3$ ).  $^1\text{H NMR}$  (500 MHz, Chloroform-*d*)  $\delta$  7.58 (d,  $J = 8.0$  Hz, 1H), 7.24 (d,  $J = 7.6$  Hz, 1H), 7.12 (t,  $J = 7.7$  Hz, 1H), 7.03 (d,  $J = 7.7$  Hz, 1H), 2.57 (dt,  $J = 10.5, 5.7$  Hz, 1H), 1.80 (dt,  $J = 13.7, 6.4$  Hz, 1H), 1.42 (dd,  $J = 9.8, 5.3$  Hz, 1H), 1.19 – 1.14 (m, 1H).  $^{13}\text{C NMR}$  (151 MHz, Chloroform-*d*)  $\delta$  138.2, 133.1, 128.7, 127.8, 127.7, 126.2, 126.1 (q,  $J = 271.2$  Hz), 22.7 (q,  $J = 37.0$  Hz), 20.9 (q,  $J = 3.1$  Hz), 10.4 (q,  $J = 2.2$  Hz).  $^{19}\text{F NMR}$  (470 MHz, Chloroform-*d*)  $\delta$  -66.54 (d,  $J = 6.5$  Hz). IR (neat,  $\text{cm}^{-1}$ ): 3064, 2926, 1419, 1267, 1147, 906, 732. HPLC analysis *trans*-isomer: *e.e.* = 92%. OJ-H (0.1% isopropanol: 99.9% hexane, 0.8 ml/min):  $t_{\text{major}} = 6.8$  min,  $t_{\text{minor}} = 7.1$  min. HRMS-(DART+) calculated for  $\text{C}_{10}\text{H}_8\text{BrF}_3$   $[\text{M}]^+$ : 263.9756, found: 263.9751.

### 1-Bromo-2-methyl-4-((1*R*,2*R*)-2-(trifluoromethyl)cyclopropyl)benzene (3h)

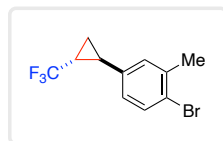

Yield: 98%. Colorless oil. Isolated as a mixture of diastereomers *trans/cis*: 97/3.  $[\alpha]_D^{20} = (-)-73.58$  ( $c = 0.5$ ,  $\text{CHCl}_3$ ).  $^1\text{H NMR}$  (500 MHz, Chloroform-*d*)  $\delta$  7.44 (d,  $J = 8.2$  Hz, 1H), 6.99 (s, 1H), 6.79 (dd,  $J = 8.2, 1.9$  Hz, 1H), 2.37 (s, 3H), 2.29 (dt,  $J = 10.1, 5.3$  Hz, 1H), 1.81 – 1.72 (m, 1H), 1.36 (dt,  $J = 9.5, 5.6$  Hz, 1H), 1.16 – 1.11 (m, 1H).  $^{13}\text{C NMR}$  (101 MHz, Chloroform-*d*)  $\delta$  138.4, 138.2, 132.6, 129.2, 125.9 (q,  $J = 271.0$  Hz), 125.5, 123.1, 23.1 (q,  $J = 37.0$  Hz), 23.0, 19.2 (q,  $J = 2.4$  Hz), 10.9 (d,  $J = 2.7$  Hz).  $^{19}\text{F NMR}$  (470 MHz, Chloroform-*d*)  $\delta$  -66.85 (d,  $J = 6.5$  Hz). IR (neat,  $\text{cm}^{-1}$ ): 2961, 2927, 1467, 1267, 1138, 1029, 816. HPLC analysis *trans*-isomer: *e.e.* = 84%. OD-H (0.1% isopropanol: 99.9% hexane, 0.8 ml/min):  $t_{\text{minor}} = 10.5$  min,  $t_{\text{major}} = 11.1$  min. HRMS-(DART+) calculated for  $\text{C}_{11}\text{H}_{10}\text{F}_3\text{Br}$   $[\text{M}]^+$ : 277.9912, found: 277.9913.

### 3-((1*R*,2*R*)-2-(Trifluoromethyl)cyclopropyl)benzaldehyde (3i)

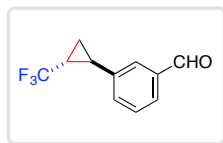

Yield: 94%. Colorless oil. Isolated as a mixture of diastereomers *trans/cis*: 97/3.  $[\alpha]_D^{20} = (-)-83.97$  ( $c = 0.2$ ,  $\text{CHCl}_3$ ).  $^1\text{H NMR}$  (500 MHz, Chloroform-*d*)  $\delta$  10.00 (s, 1H), 7.75 (d,  $J = 7.5$  Hz, 1H), 7.63 (s, 1H), 7.54 – 7.37 (m, 2H), 2.44 (dt,  $J = 10.4$ , 5.4 Hz, 1H), 1.87 (hept,  $J = 7.2$ , 6.6 Hz, 1H), 1.45 (dt,  $J = 11.4$ , 5.8 Hz, 1H), 1.25 (q,  $J = 7.6$ , 6.9 Hz, 1H).  $^{13}\text{C NMR}$  (151 MHz, Chloroform-*d*)  $\delta$  192.1 (d,  $J = 3.0$  Hz), 140.4, 136.9, 133.0, 129.5, 128.9, 126.9, 125.8 (q,  $J = 271.1$  Hz), 23.3 (q,  $J = 37.1$  Hz), 19.4 (q,  $J = 2.9$  Hz), 11.1 (q,  $J = 2.7$  Hz).  $^{19}\text{F NMR}$  (470 MHz, Chloroform-*d*)  $\delta$  -66.91 (d,  $J = 6.6$  Hz). IR (neat,  $\text{cm}^{-1}$ ): 2963, 2824, 1700, 1422, 1270, 1137, 800. HPLC analysis *trans*-isomer: *e.e.* = 83%. IB (5% isopropanol: 95% hexane, 0.8 ml/min):  $t_{\text{major}} = 8.3$  min,  $t_{\text{minor}} = 8.8$  min. HRMS-(DART+) calculated for  $\text{C}_{11}\text{H}_{10}\text{F}_3\text{O}$   $[\text{M}+\text{H}]^+$ : 215.0678, found: 215.0675.

### 4-((1*R*,2*R*)-2-(Trifluoromethyl)cyclopropyl)benzo[d][1,3]dioxole (3j)

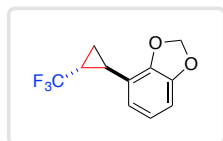

Yield: 62%. Colorless oil. Isolated as a mixture of diastereomers *trans/cis*: 97/3.  $[\alpha]_D^{20} = (-)-29.32$  ( $c = 0.3$ ,  $\text{CHCl}_3$ ).  $^1\text{H NMR}$  (600 MHz, Chloroform-*d*)  $\delta$  6.76 (t,  $J = 7.8$  Hz, 1H), 6.70 (d,  $J = 7.8$  Hz, 1H), 6.55 (d,  $J = 7.9$  Hz, 1H), 5.94 (s, 2H), 2.30 (dt,  $J = 10.1$ , 5.6 Hz, 1H), 2.01 (dq,  $J = 12.7$ , 6.3 Hz, 1H), 1.31 (ddd,  $J = 21.1$ , 9.8, 5.9 Hz, 2H).  $^{13}\text{C NMR}$  (101 MHz, Chloroform-*d*)  $\delta$  147.3, 145.4, 126.0 (q,  $J = 270.9$  Hz), 121.7, 120.7, 120.0, 107.1, 100.8, 21.3 (q,  $J = 37.0$  Hz), 14.9 (q,  $J = 2.9$  Hz), 9.7 (q,  $J = 2.6$  Hz).  $^{19}\text{F NMR}$  (564 MHz, Chloroform-*d*)  $\delta$  -67.01 (d,  $J = 6.5$  Hz). IR (neat,  $\text{cm}^{-1}$ ): 2964, 2895, 1454, 1269, 1144, 1065, 932, 767. HPLC analysis *trans*-isomer: *e.e.* = 84%. OD-H (1% isopropanol: 99% hexane, 0.8 ml/min):  $t_{\text{minor}} = 13.9$  min,  $t_{\text{major}} = 14.6$  min. HRMS-(DART+) calculated for  $\text{C}_{11}\text{H}_9\text{F}_3\text{O}_2$   $[\text{M}]^+$ : 230.0549, found: 230.0560.

### 2-((1*R*,2*R*)-2-(Trifluoromethyl)cyclopropyl)naphthalene (3k)

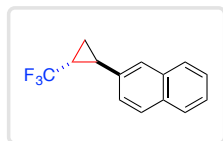

Yield: 91%. Colorless oil. Isolated as a mixture of diastereomers *trans/cis*: 98/2.  $[\alpha]_D^{20} = (-)-31.99$  ( $c = 0.3$ ,  $\text{CHCl}_3$ ).  $^1\text{H NMR}$  (500 MHz, Chloroform-*d*)  $\delta$  7.79 (q,  $J = 7.9$ , 7.0 Hz, 3H), 7.60 – 7.56 (m, 1H), 7.46 (dddd,  $J = 14.5$ , 8.3, 6.9, 1.5 Hz, 2H), 7.25 – 7.22 (m, 1H), 2.53 (dt,  $J = 10.2$ , 5.5 Hz, 1H), 1.97 – 1.85 (m, 1H), 1.44 (dt,  $J = 9.5$ , 5.6 Hz, 1H), 1.32 – 1.27 (m, 1H).  $^{13}\text{C NMR}$  (101 MHz, Chloroform-*d*)  $\delta$  136.5, 133.5, 132.5, 128.5, 127.8, 127.6, 126.5, 126.1 (q,  $J = 271.1$  Hz), 125.8, 125.2, 125.0, 23.1 (q,  $J = 37.0$  Hz), 20.0 (q,  $J = 2.7$  Hz), 10.9 (q,  $J = 2.6$  Hz).  $^{19}\text{F NMR}$  (470 MHz, Chloroform-*d*)  $\delta$  -66.72 (d,  $J = 6.6$  Hz). IR (neat,  $\text{cm}^{-1}$ ): 2920, 1422, 1369, 1269, 1140, 848, 770. HPLC analysis *trans*-isomer: *e.e.* = 91%. IF (0.1% isopropanol: 99.9% hexane, 0.8 ml/min):  $t_{\text{major}} = 8.2$  min,  $t_{\text{minor}} = 8.5$  min. HRMS-(DART+) calculated for  $\text{C}_{14}\text{H}_{11}\text{F}_3$   $[\text{M}]^+$ : 236.0807, found: 236.0808.

### 2-((1*R*,2*R*)-2-(Trifluoromethyl)cyclopropyl)benzofuran (3l)

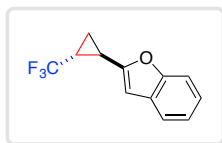

Yield: 99%. Colorless oil. Isolated as a mixture of diastereomers *trans/cis*: 99/1.

$[\alpha]_D^{20} = (-)-80.47$  ( $c = 0.5$ ,  $\text{CHCl}_3$ ).  $^1\text{H NMR}$  (600 MHz, Chloroform-*d*)  $\delta$  7.47 (d,  $J = 7.4$  Hz, 1H), 7.37 (d,  $J = 7.9$  Hz, 1H), 7.24 – 7.18 (m, 2H), 6.51 (s, 1H), 2.49 (dt,  $J = 9.8, 5.4$  Hz, 1H), 2.16 (hept,  $J = 6.6$  Hz, 1H), 1.42 (dq,  $J = 11.3, 5.8, 5.0$  Hz, 2H).

$^{13}\text{C NMR}$  (151 MHz, Chloroform-*d*)  $\delta$  155.2, 154.5, 128.7, 125.6 (q,  $J = 271.2$  Hz), 123.9, 123.0, 120.5, 111.0, 102.8 (d,  $J = 2.6$  Hz), 21.7 (q,  $J = 37.4$  Hz), 13.8 (q,  $J = 3.0$  Hz), 9.9 (q,  $J = 2.9$  Hz).  $^{19}\text{F NMR}$  (564 MHz, Chloroform-*d*)  $\delta$  -67.21 (d,  $J = 6.6$  Hz). IR (neat,  $\text{cm}^{-1}$ ): 3058, 2963, 1609, 1453, 1266, 1142, 964, 750.

HPLC analysis *trans*-isomer: *e.e.* = 90%. OJ-H (0.1% isopropanol: 99.9% hexane, 0.8 ml/min):  $t_{\text{minor}} = 12.7$  min,  $t_{\text{major}} = 13.8$  min. HRMS-(DART+) calculated for  $\text{C}_{12}\text{H}_{10}\text{F}_3\text{O}$   $[\text{M}+\text{H}]^+$ : 227.0678, found: 227.0689.

### 3-((1*R*,2*R*)-2-(Trifluoromethyl)cyclopropyl)benzo[*b*]thiophene (3m)

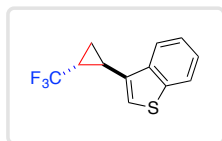

Yield: 98%. Colorless oil. Isolated as a mixture of diastereomers *trans/cis*: 96/4.

$[\alpha]_D^{20} = (+)-73.48$  ( $c = 0.4$ ,  $\text{CHCl}_3$ ).  $^1\text{H NMR}$  (500 MHz, Chloroform-*d*)  $\delta$  7.94 (d,  $J = 7.9$  Hz, 1H), 7.86 (d,  $J = 8.0$  Hz, 1H), 7.45 (t,  $J = 7.5$  Hz, 1H), 7.40 (t,  $J = 7.5$  Hz, 1H), 7.08 (s, 1H), 2.50 (dt,  $J = 10.1, 5.4$  Hz, 1H), 1.79 (dh,  $J = 12.3, 5.8$  Hz, 1H),

1.45 (dt,  $J = 10.0, 5.4$  Hz, 1H), 1.32 – 1.23 (m, 1H).  $^{13}\text{C NMR}$  (151 MHz, Chloroform-*d*)  $\delta$  140.6, 139.2, 134.2, 125.3 (q,  $J = 270.9$  Hz), 124.9, 124.5, 123.0, 122.2 (d,  $J = 2.8$  Hz), 121.9, 21.4 (q,  $J = 36.7$  Hz), 13.8 (q,  $J = 2.9$  Hz), 9.0 (q,  $J = 2.6$  Hz).  $^{19}\text{F NMR}$  (470 MHz, Chloroform-*d*)  $\delta$  -66.55 (d,  $J = 6.7$  Hz). IR (neat,  $\text{cm}^{-1}$ ): 3058, 2962, 1419, 1362, 1267, 1144, 764. HPLC analysis *trans*-isomer: *e.e.* = 91%. OJ-H (0.1% isopropanol: 99.9% hexane, 0.8 ml/min):  $t_{\text{major}} = 11.3$  min,  $t_{\text{minor}} = 12.7$  min. HRMS-(DART+) calculated for  $\text{C}_{12}\text{H}_9\text{F}_3\text{S}$   $[\text{M}]^+$ : 242.0372, found: 242.0377.

### (*R*)-2-(Trifluoromethyl)cyclopropane-1,1-diyl)dibenzene (3n)

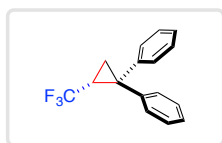

Yield: 88%. White solid.  $[\alpha]_D^{20} = (-)-85.18$  ( $c = 1.0$ ,  $\text{CHCl}_3$ ).  $^1\text{H NMR}$  (500 MHz, Chloroform-*d*)  $\delta$  7.42 – 7.38 (m, 2H), 7.30 – 7.26 (m, 2H), 7.26 – 7.11 (m, 6H), 2.35 – 2.25 (m, 1H), 1.85 (t,  $J = 5.6$  Hz, 1H), 1.48 (q,  $J = 5.5, 4.9$  Hz, 1H).  $^{13}\text{C NMR}$  (101 MHz, Chloroform-*d*)  $\delta$  144.6, 139.2, 129.8, 128.8, 128.5, 128.0, 127.3, 127.0, 126.0

(q,  $J = 272.0$  Hz), 36.1, 26.9 (q,  $J = 35.8$  Hz), 15.7 (q,  $J = 2.6$  Hz).  $^{19}\text{F NMR}$  (470 MHz, Chloroform-*d*)  $\delta$  -61.45 (d,  $J = 7.5$  Hz). IR (neat,  $\text{cm}^{-1}$ ): 3060, 2964, 1495, 1409, 1276, 1123, 703. HPLC analysis: *e.e.* = 85%. IF (0.1% isopropanol: 99.9% hexane, 0.8 ml/min):  $t_{\text{minor}} = 6.5$  min,  $t_{\text{major}} = 7.1$  min. HRMS-(DART+) calculated for  $\text{C}_{16}\text{H}_{14}\text{F}_3$   $[\text{M}+\text{H}]^+$ : 263.1042, found: 263.1034. The structure was characterized by X-ray crystallography.

### 1-Methoxy-4-((1*R*,2*R*)-1-methyl-2-(trifluoromethyl)cyclopropyl)benzene (3o)

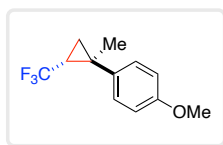

Yield: 95%. Colorless oil. Isolated as a mixture of diastereomers *trans/cis*: 99/1.  $[\alpha]_D^{20} = (-) -49.32$  ( $c = 0.3$ ,  $\text{CHCl}_3$ ).  $^1\text{H NMR}$  (400 MHz, Chloroform-*d*)  $\delta$  7.21 (d,  $J = 8.2$  Hz, 2H), 6.84 (d,  $J = 7.5$  Hz, 2H), 3.79 (s, 3H), 1.72 (dt,  $J = 15.3, 8.5$  Hz, 1H), 1.49 (s, 3H), 1.33 – 1.29 (m, 1H), 1.18 (t,  $J = 5.5$  Hz, 1H).  $^{13}\text{C NMR}$  (101 MHz, Chloroform-*d*)  $\delta$  158.4, 137.9, 128.8, 126.9 (q,  $J = 272.0$  Hz), 114.1, 55.5, 26.3 (q,  $J = 36.0$  Hz), 25.7, 21.2 (q,  $J = 1.9$  Hz), 16.8 (q,  $J = 2.4$  Hz).  $^{19}\text{F NMR}$  (470 MHz, Chloroform-*d*)  $\delta$  -59.81 (d,  $J = 8.4$  Hz). IR (neat,  $\text{cm}^{-1}$ ): 2964, 2931, 1413, 1273, 1140, 830, 738. HPLC analysis *trans*-isomer: *e.e.* = 94%. IB (1% isopropanol: 99% hexane, 0.8 ml/min):  $t_{\text{minor}} = 7.6$  min,  $t_{\text{major}} = 8.3$  min. HRMS-(DART+) calculated for  $\text{C}_{12}\text{H}_{14}\text{F}_3\text{O}$   $[\text{M}+\text{H}]^+$ : 231.0991, found: 231.1002.

### 1-Chloro-4-((1*R*,2*R*)-1-methyl-2-(trifluoromethyl)cyclopropyl)benzene (3p)

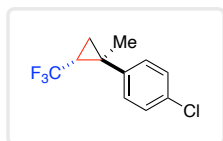

Yield: 97%. Colorless oil. Isolated as a mixture of diastereomers *trans/cis*: 99/1.  $[\alpha]_D^{20} = (-) -41.13$  ( $c = 0.5$ ,  $\text{CHCl}_3$ ).  $^1\text{H NMR}$  (500 MHz, Chloroform-*d*)  $\delta$  7.27 (t,  $J = 1.7$  Hz, 1H), 7.26 – 7.24 (m, 1H), 7.23 – 7.19 (m, 2H), 1.70 (dt,  $J = 15.5, 7.2$  Hz, 1H), 1.49 (s, 3H), 1.34 – 1.29 (m, 1H), 1.21 (t,  $J = 5.7$  Hz, 1H).  $^{13}\text{C NMR}$  (101 MHz, Chloroform-*d*)  $\delta$  144.1, 132.7, 129.1, 128.9, 126.6 (q,  $J = 272.3$  Hz), 26.3 (q,  $J = 36.0$  Hz), 25.8, 20.8 (q,  $J = 1.9$  Hz), 16.8 (q,  $J = 2.5$  Hz).  $^{19}\text{F NMR}$  (470 MHz, Chloroform-*d*)  $\delta$  -59.94 (d,  $J = 8.2$  Hz). IR (neat,  $\text{cm}^{-1}$ ): 2964, 2931, 1413, 1273, 1140, 830, 738. HPLC analysis *trans*-isomer: *e.e.* = 98%. OD-H (0.1% isopropanol: 99.9% hexane, 0.8 ml/min):  $t_{\text{minor}} = 6.1$  min,  $t_{\text{major}} = 6.5$  min. HRMS-(DART+) calculated for  $\text{C}_{11}\text{H}_{11}\text{ClF}_3$   $[\text{M}+\text{H}]^+$ : 235.0495, found: 235.0569.

### 1-Chloro-4-((1*S*,2*R*)-2-(trifluoromethyl)-[1,1'-bi(cyclopropan)]-1-yl)benzene (3q)

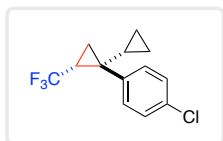

Yield: 51%. Colorless oil. Isolated as a mixture of diastereomers *trans/cis*: 99/1.  $[\alpha]_D^{20} = (-) -45.32$  ( $c = 0.6$ ,  $\text{CHCl}_3$ ).  $^1\text{H NMR}$  (500 MHz, Chloroform-*d*)  $\delta$  7.27 (d,  $J = 2.2$  Hz, 2H), 7.18 (d,  $J = 8.5$  Hz, 2H), 1.76 (dt,  $J = 15.2, 8.3$  Hz, 1H), 1.23 (d,  $J = 7.0$  Hz, 2H), 1.15 (td,  $J = 8.1, 4.1$  Hz, 1H), 0.57 – 0.45 (m, 2H), 0.20 (dq,  $J = 9.7, 5.0$  Hz, 1H), 0.12 (dt,  $J = 10.1, 5.1$  Hz, 1H).  $^{13}\text{C NMR}$  (101 MHz, Chloroform-*d*)  $\delta$  142.0, 132.9, 130.5, 128.6, 126.7 (q,  $J = 272.4$  Hz), 31.5, 26.9 (q,  $J = 36.6$  Hz), 14.3 (q,  $J = 2.3$  Hz), 13.5, 5.2 (q,  $J = 2.2$  Hz), 3.7.  $^{19}\text{F NMR}$  (376 MHz, Chloroform-*d*)  $\delta$  -59.63 (d,  $J = 8.3$  Hz). IR (neat,  $\text{cm}^{-1}$ ): 3086, 3011, 1493, 1412, 1275, 1127, 1089, 826. HPLC analysis *trans*-isomer: *e.e.* = 98%. OD-H (0.1% isopropanol: 99.9% hexane, 0.8 ml/min):  $t_{\text{minor}} = 6.2$  min,  $t_{\text{major}} = 6.9$  min. HRMS-(DART+) calculated for  $\text{C}_{13}\text{H}_{13}\text{ClF}_3$   $[\text{M}+\text{H}]^+$ : 261.0652, found: 261.0663.

### 1-((1*S*,2*S*)-1-Chloro-2-(trifluoromethyl)cyclopropyl)-4-methoxybenzene (3r)

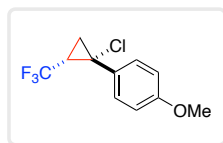

Yield: 60%. Colorless oil. Isolated as a mixture of diastereomers *trans/cis*: 96/4.  $[\alpha]_D^{20} = (-) -40.58$  ( $c = 0.5$ ,  $\text{CHCl}_3$ ).  $^1\text{H NMR}$  (400 MHz, Chloroform-*d*)  $\delta$  7.39 (d,  $J = 8.9$  Hz, 2H), 6.88 (d,  $J = 8.8$  Hz, 2H), 3.81 (s, 3H), 2.05 (dp,  $J = 10.1, 7.2$  Hz, 1H), 1.84 (t,  $J = 6.9$  Hz, 1H), 1.75 (dd,  $J = 10.1, 7.0$  Hz, 1H).  $^{13}\text{C NMR}$  (101 MHz, Chloroform-*d*)  $\delta$  159.9, 133.2, 129.5, 124.9 (q,  $J = 272.4$  Hz), 114.3, 55.5 (q,  $J = 3.4$  Hz), 43.9 (q,  $J = 2.3$  Hz), 27.9 (q,  $J = 36.9$  Hz), 19.2 (q,  $J = 2.3$  Hz).  $^{19}\text{F NMR}$  (376 MHz, Chloroform-*d*)  $\delta$  -61.38 (d,  $J = 7.5$  Hz). IR (neat,  $\text{cm}^{-1}$ ): 2960, 2916, 1611, 1516, 1406, 1250, 1129, 831. HPLC analysis *trans*-isomer: *e.e.* = 87%. OD-H (5% isopropanol: 95% hexane, 0.8 ml/min):  $t_{\text{minor}} = 5.8$  min,  $t_{\text{major}} = 7.1$  min. HRMS-(DART+) calculated for  $\text{C}_{11}\text{H}_{11}\text{ClF}_3\text{O}$   $[\text{M}+\text{H}]^+$ : 251.0445, found: 251.0453.

### (1*R*,2*R*)-5'-Bromo-2-(trifluoromethyl)-2',3'-dihydrospiro[cyclopropane-1,1'-indene] (3s)

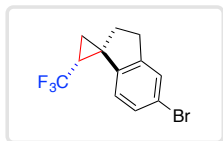

Yield: 98%. Colorless oil. Isolated as a mixture of diastereomers *trans/cis*: 93/7.  $[\alpha]_D^{20} = (-) -74.23$  ( $c = 1.0$ ,  $\text{CHCl}_3$ ).  $^1\text{H NMR}$  (500 MHz, Chloroform-*d*)  $\delta$  7.37 (s, 1H), 7.28 (d,  $J = 8.1$  Hz, 1H), 6.54 (d,  $J = 8.1$  Hz, 1H), 3.12 – 3.00 (m, 2H), 2.44 (dt,  $J = 15.9, 8.2$  Hz, 1H), 2.16 (dt,  $J = 13.5, 7.0$  Hz, 1H), 1.89 (dq,  $J = 15.3, 7.6$  Hz, 1H), 1.41 (t,  $J = 5.8$  Hz, 1H), 1.21 (dd,  $J = 9.1, 5.7$  Hz, 1H).  $^{13}\text{C NMR}$  (151 MHz, Chloroform-*d*)  $\delta$  146.2, 144.3, 129.9, 127.9, 126.1 (q,  $J = 272.2$  Hz), 120.7, 120.1, 30.8 (q,  $J = 1.9$  Hz), 30.7, 29.8 (q,  $J = 1.6$  Hz), 26.7 (q,  $J = 36.0$  Hz), 18.7 (q,  $J = 2.9$  Hz).  $^{19}\text{F NMR}$  (470 MHz, Chloroform-*d*)  $\delta$  -62.54 (d,  $J = 7.6$  Hz). IR (neat,  $\text{cm}^{-1}$ ): 2958, 2851, 1598, 1412, 1271, 1134, 1054, 816. HPLC analysis *trans*-isomer: *e.e.* = 95%. OD-H (0.1% isopropanol: 99.9% hexane, 0.8 ml/min):  $t_{\text{minor}} = 10.8$  min,  $t_{\text{major}} = 12.0$  min. HRMS-(DART+) calculated for  $\text{C}_{12}\text{H}_{11}\text{F}_3\text{Br}$   $[\text{M}+\text{H}]^+$ : 290.9991, found: 290.9985.

### (1*R*,2*R*)-6'-Methoxy-2-(trifluoromethyl)-3',4'-dihydro-2'H-spiro[cyclopropane-1,1'-naphthalene] (3t)

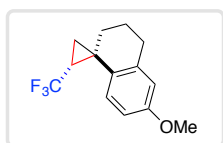

Yield: 98%. Colorless oil. Isolated as a mixture of diastereomers *trans/cis*: 96/4.  $[\alpha]_D^{20} = (-) -28.39$  ( $c = 0.5$ ,  $\text{CHCl}_3$ ).  $^1\text{H NMR}$  (400 MHz, Chloroform-*d*)  $\delta$  6.69 (dd,  $J = 8.7, 2.6$  Hz, 1H), 6.64 (d,  $J = 2.7$  Hz, 1H), 6.57 (d,  $J = 8.7$  Hz, 1H), 3.77 (s, 3H), 2.86 (t,  $J = 5.7$  Hz, 2H), 1.99 – 1.86 (m, 4H), 1.85 – 1.76 (m, 1H), 1.39 (dd,  $J = 8.9, 6.5$  Hz, 1H), 1.26 (s, 1H).  $^{13}\text{C NMR}$  (101 MHz, Chloroform-*d*)  $\delta$  157.8, 139.3, 131.1, 126.4 (q,  $J = 272.8$  Hz), 122.9, 113.8, 112.8, 55.4, 30.9, 29.8 (q,  $J = 35.9$  Hz), 28.4 (q,  $J = 1.8$  Hz), 23.5 (q,  $J = 1.5$  Hz), 22.2, 19.8 (q,  $J = 2.8$  Hz).  $^{19}\text{F NMR}$  (564 MHz, Chloroform-*d*)  $\delta$  -59.17 (d,  $J = 8.3$  Hz). IR (neat,  $\text{cm}^{-1}$ ): 2934, 2836, 1610, 1505, 1413, 1265, 1134, 818. HPLC analysis *trans*-isomer: *e.e.* = 98%. OJ-H (2% isopropanol: 98% hexane, 0.8 ml/min):  $t_{\text{major}} = 11.2$  min,  $t_{\text{minor}} = 13.1$  min. HRMS-(DART+) calculated for  $\text{C}_{14}\text{H}_{16}\text{F}_3\text{O}$   $[\text{M}+\text{H}]^+$ : 257.1148, found: 257.1153.

### **((E)-2-(((1R,2R)-2-(Trifluoromethyl)cyclopropyl)prop-1-en-1-yl)benzene (3u)**

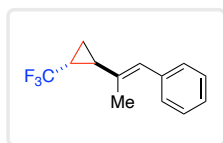

Yield: 95%. Colorless oil. Isolated as a mixture of diastereomers *trans/cis*: 96/4.  $[\alpha]_D^{20} = (-) -42.49$  ( $c = 0.4$ ,  $\text{CHCl}_3$ ).  $^1\text{H NMR}$  (500 MHz, Chloroform-*d*)  $\delta$  7.37 – 7.32 (m, 2H), 7.30 – 7.19 (m, 3H), 6.38 (s, 1H), 2.02 – 1.97 (m, 1H), 1.83 (s, 3H), 1.69 (p,  $J = 6.8$  Hz, 1H), 1.15 (dt,  $J = 10.4, 5.9$  Hz, 1H), 1.12 – 1.07 (m, 1H).  $^{13}\text{C NMR}$  (101 MHz, Chloroform-*d*)  $\delta$  137.6, 135.1, 128.9, 128.3, 126.5, 126.2 (q,  $J = 270.9$  Hz), 126.1, 24.0 (q,  $J = 2.6$  Hz), 20.2 (q,  $J = 36.7$  Hz), 16.3, 8.2 (q,  $J = 2.5$  Hz).  $^{19}\text{F NMR}$  (470 MHz, Chloroform-*d*)  $\delta$  -66.48 (d,  $J = 6.7$  Hz). IR (neat,  $\text{cm}^{-1}$ ): 3024, 2927, 1419, 1325, 1268, 1139, 742. HPLC analysis *trans*-isomer: *e.e.* = 76%. OD-H (1% isopropanol: 99% hexane, 0.8 ml/min):  $t_{\text{major}} = 10.6$  min,  $t_{\text{minor}} = 11.7$  min. HRMS-(DART+) calculated for  $\text{C}_{13}\text{H}_{14}\text{F}_3$   $[\text{M}+\text{H}]^+$ : 227.1042, found: 227.1039.

### **1-Methoxy-2-(((1R,2R)-2-(trifluoromethyl)cyclopropyl)ethynyl)benzene (3v)**

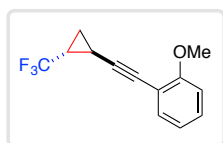

Yield: 98%. Colorless oil. Isolated as a mixture of diastereomers *trans/cis*: 99/1.  $[\alpha]_D^{20} = (-) -71.44$  ( $c = 1.1$ ,  $\text{CHCl}_3$ ).  $^1\text{H NMR}$  (400 MHz, Chloroform-*d*)  $\delta$  7.34 (d,  $J = 7.5$  Hz, 1H), 7.27 – 7.22 (m, 1H), 6.90 – 6.83 (m, 2H), 3.86 (s, 3H), 1.98 (q,  $J = 9.3, 8.3$  Hz, 2H), 1.32 – 1.26 (m, 1H), 1.25 – 1.21 (m, 1H).  $^{13}\text{C NMR}$  (151 MHz, Chloroform-*d*)  $\delta$  160.3, 133.9, 129.7, 125.3 (q,  $J = 271.1$  Hz), 120.6, 112.1, 110.7, 92.4, 74.3, 55.9, 23.1 (q,  $J = 37.0$  Hz), 11.7 (q,  $J = 2.6$  Hz), 5.6 (q,  $J = 3.7$  Hz).  $^{19}\text{F NMR}$  (376 MHz, Chloroform-*d*)  $\delta$  -67.32 (d,  $J = 5.8$  Hz). IR (neat,  $\text{cm}^{-1}$ ): 2940, 2839, 1597, 1418, 1263, 1144, 751. HPLC analysis *trans*-isomer: *e.e.* = 86%. OD-H (5% isopropanol: 95% hexane, 0.8 ml/min):  $t_{\text{major}} = 8.2$  min,  $t_{\text{minor}} = 9.0$  min. HRMS-(DART+) calculated for  $\text{C}_{13}\text{H}_{12}\text{F}_3\text{O}$   $[\text{M}+\text{H}]^+$ : 241.0835, found: 241.0836.

### **1-Chloro-4-(((1R,2R)-2-(trifluoromethyl)cyclopropoxy)benzene (3w)**

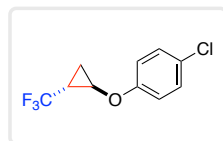

Yield: 64%. Colorless oil. Isolated as a mixture of diastereomers *trans/cis*: 99/1.  $[\alpha]_D^{20} = (+) -49.98$  ( $c = 0.2$ ,  $\text{CHCl}_3$ ).  $^1\text{H NMR}$  (400 MHz, Chloroform-*d*)  $\delta$  7.28 – 7.26 (m, 1H), 7.26 (s, 1H), 6.96 – 6.92 (m, 2H), 3.96 (ddd,  $J = 6.5, 4.0, 2.4$  Hz, 1H), 1.87 (dtd,  $J = 9.8, 7.0, 2.6$  Hz, 1H), 1.34 – 1.29 (m, 2H).  $^{13}\text{C NMR}$  (101 MHz, Chloroform-*d*)  $\delta$  156.4, 129.7, 127.1, 125.1 (q,  $J = 270.8$  Hz), 116.2, 52.2 (q,  $J = 3.8$  Hz), 21.3 (q,  $J = 37.0$  Hz), 10.4 (q,  $J = 2.7$  Hz).  $^{19}\text{F NMR}$  (376 MHz, Chloroform-*d*)  $\delta$  -65.51 (d,  $J = 6.8$  Hz). IR (neat,  $\text{cm}^{-1}$ ): 2925, 2851, 1490, 1409, 1241, 1136, 1084, 824. HPLC analysis *trans*-isomer: *e.e.* = 52%. OD-H (1% isopropanol: 99% hexane, 0.8 ml/min):  $t_{\text{major}} = 9.4$  min,  $t_{\text{minor}} = 11.9$  min. HRMS-(DART+) calculated for  $\text{C}_{10}\text{H}_9\text{ClF}_3\text{O}$   $[\text{M}+\text{H}]^+$ : 237.0288, found: 237.0297.



### 9-((1R,2R)-2-(Trifluoromethyl)cyclopropyl)-9H-carbazole (3x)

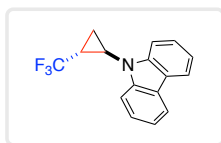

Yield: 76%. Colorless oil. Isolated as a mixture of diastereomers *trans/cis*: 99/1.  $[\alpha]_D^{20} = (-)-53.79$  ( $c = 1.0$ ,  $\text{CHCl}_3$ ).  $^1\text{H NMR}$  (500 MHz, Chloroform-*d*)  $\delta$  8.07 (d,  $J = 8.2$  Hz, 2H), 7.60 (d,  $J = 8.2$  Hz, 2H), 7.51 – 7.46 (m, 2H), 7.30 – 7.25 (m, 2H), 3.67 (ddd,  $J = 7.6, 4.6, 3.2$  Hz, 1H), 2.24 (ddq,  $J = 9.7, 6.5, 3.3$  Hz, 1H), 1.78 (q,  $J = 6.9$  Hz, 1H), 1.64 (p,  $J = 5.4$  Hz, 1H).  $^{13}\text{C NMR}$  (101 MHz, Chloroform-*d*)  $\delta$  140.8, 126.2, 125.4 (q,  $J = 271.4$  Hz), 123.4, 120.6, 120.0, 109.7, 27.4 (q,  $J = 3.9$  Hz), 22.1 (q,  $J = 36.6$  Hz), 11.2 (q,  $J = 2.2$  Hz).  $^{19}\text{F NMR}$  (470 MHz, Chloroform-*d*)  $\delta$  -65.75 (d,  $J = 6.6$  Hz). IR (neat,  $\text{cm}^{-1}$ ): 3054, 3025, 1597, 1453, 1317, 1263, 1135, 1071. HPLC analysis *trans*-isomer: *e.e.* = 89%. OD-H (5% isopropanol: 95% hexane, 0.8 ml/min):  $t_{\text{major}} = 7.9$  min,  $t_{\text{minor}} = 10.2$  min. HRMS-(DART+) calculated for  $\text{C}_{16}\text{H}_{13}\text{F}_3\text{N}$   $[\text{M}+\text{H}]^+$ : 276.0995, found: 276.0992.

### 1-((1R,2R)-2-(Trifluoromethyl)cyclopropyl)-1H-indole (3y)

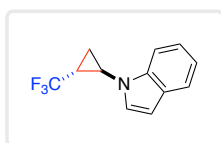

Yield: 83%. Colorless oil. Isolated as a mixture of diastereomers *trans/cis*: 99/1.  $[\alpha]_D^{20} = (+)-22.99$  ( $c = 0.3$ ,  $\text{CHCl}_3$ ).  $^1\text{H NMR}$  (400 MHz, Chloroform-*d*)  $\delta$  7.62 (d,  $J = 7.9$  Hz, 1H), 7.55 (d,  $J = 8.2$  Hz, 1H), 7.29 (d,  $J = 7.0$  Hz, 1H), 7.17 (t,  $J = 7.5$  Hz, 1H), 7.07 (d,  $J = 3.3$  Hz, 1H), 6.49 (d,  $J = 3.3$  Hz, 1H), 3.72 (td,  $J = 5.8, 3.2$  Hz, 1H), 2.18 – 2.06 (m, 1H), 1.60 (dd,  $J = 8.6, 5.7$  Hz, 2H).  $^{13}\text{C NMR}$  (101 MHz, Chloroform-*d*)  $\delta$  137.2, 129.0, 127.2, 125.3 (q,  $J = 271.2$  Hz), 122.5, 121.3, 120.5, 109.9, 102.6 (d,  $J = 2.7$  Hz), 30.3 – 30.0 (m), 22.1 (q,  $J = 37.0$  Hz), 10.2 (q,  $J = 2.2$  Hz).  $^{19}\text{F NMR}$  (376 MHz, Chloroform-*d*)  $\delta$  -66.01 (d,  $J = 6.8$  Hz). IR (neat,  $\text{cm}^{-1}$ ): 3057, 2922, 1466, 1416, 1266, 1143, 1002, 745. HPLC analysis *trans*-isomer: *e.e.* = 92%. OD-H (2% isopropanol: 98% hexane, 0.8 ml/min):  $t_{\text{minor}} = 32.3$  min,  $t_{\text{major}} = 35.3$  min. HRMS-(DART+) calculated for  $\text{C}_{12}\text{H}_{11}\text{F}_3\text{N}$   $[\text{M}+\text{H}]^+$ : 226.0838, found: 226.0842.

### 2-((1R,2R)-2-(Trifluoromethyl)cyclopropyl)isoindoline-1,3-dione (3z)

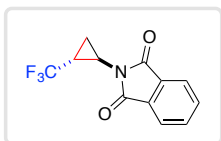

Yield: 50%. Colorless oil. Isolated as a mixture of diastereomers *trans/cis*: 99/1.  $[\alpha]_D^{20} = (-)-40.98$  ( $c = 0.3$ ,  $\text{CHCl}_3$ ).  $^1\text{H NMR}$  (500 MHz, Chloroform-*d*)  $\delta$  7.84 (d,  $J = 3.0$  Hz, 2H), 7.74 (d,  $J = 3.3$  Hz, 2H), 3.24 (dt,  $J = 8.3, 4.3$  Hz, 1H), 2.36 (dtd,  $J = 12.9, 9.8, 9.1, 5.9$  Hz, 1H), 1.62 (dt,  $J = 10.9, 5.8$  Hz, 1H), 1.48 (q,  $J = 7.2$  Hz, 1H).  $^{13}\text{C NMR}$  (151 MHz, Chloroform-*d*)  $\delta$  168.0, 134.5, 131.6, 125.3 (q,  $J = 271.1$  Hz), 123.6, 24.8 (q,  $J = 4.0$  Hz), 19.7 (q,  $J = 37.6$  Hz), 8.7 (q,  $J = 2.7$  Hz).  $^{19}\text{F NMR}$  (470 MHz, Chloroform-*d*)  $\delta$  -66.91 (d,  $J = 6.7$  Hz). IR (neat,  $\text{cm}^{-1}$ ): 2962, 2924, 1707, 1422, 1270, 1121, 873, 716. HPLC analysis *trans*-isomer: *e.e.* = 66%. OJ-H (5% isopropanol: 95% hexane, 0.8 ml/min):  $t_{\text{major}} = 17.6$  min,  $t_{\text{minor}} = 22.1$  min. HRMS-(DART+) calculated for  $\text{C}_{12}\text{H}_9\text{F}_3\text{NO}_2$   $[\text{M}+\text{H}]^+$ : 256.0580, found: 256.0583.

### Naphthalen-2-yl-((1*R*,2*R*)-2-(trifluoromethyl)cyclopropyl)methanone (**3aa**)

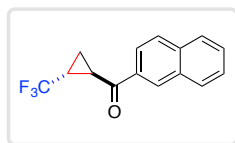

Yield: 43%. Colorless oil. Isolated as a mixture of diastereomers *trans/cis*: 99/1.  $[\alpha]_D^{20} = (-) -25.99$  ( $c = 0.2$ ,  $\text{CHCl}_3$ ).  $^1\text{H NMR}$  (400 MHz, Chloroform-*d*)  $\delta$  8.57 (s, 1H), 8.06–8.00 (m, 2H), 7.92 (dd,  $J = 12.6, 8.3$  Hz, 2H), 7.62 (dt,  $J = 20.0, 7.2$  Hz, 2H), 3.19 (dd,  $J = 9.0, 4.7$  Hz, 1H), 2.43 (dp,  $J = 12.7, 6.3$  Hz, 1H), 1.60 (dd,  $J = 9.5, 4.2$  Hz, 1H), 1.49 (dt,  $J = 10.6, 5.2$  Hz, 1H).  $^{13}\text{C NMR}$  (151 MHz, Chloroform-*d*)  $\delta$  196.4, 136.0, 134.2, 132.6, 130.4, 129.8, 129.0, 128.9, 128.0, 127.2, 125.4 (q,  $J = 271.1$  Hz), 123.9, 24.0 (q,  $J = 37.8$  Hz), 20.3 (q,  $J = 2.2$  Hz), 12.8 (q,  $J = 2.8$  Hz).  $^{19}\text{F NMR}$  (376 MHz, Chloroform-*d*)  $\delta$  -66.67 (d,  $J = 6.6$  Hz). IR (neat,  $\text{cm}^{-1}$ ): 3058, 2964, 1672, 1356, 1264, 1148, 757. HPLC analysis *trans*-isomer: *e.e.* = 51%. OJ-H (5% isopropanol: 95% hexane, 0.8 ml/min):  $t_{\text{minor}} = 10.8$  min,  $t_{\text{major}} = 15.8$  min. HRMS-(DART+) calculated for  $\text{C}_{15}\text{H}_{12}\text{F}_3\text{O}$   $[\text{M}+\text{H}]^+$ : 265.0835, found: 265.0832.

### Methyl 1-(1*H*-indol-1-yl)-2-(trifluoromethyl)cyclopropane-1-carboxylate (**3ab**)

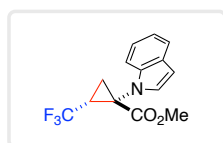

Yield: 74%. Colorless oil. Isolated as a mixture of diastereomers *trans/cis*: 38/62.  $[\alpha]_D^{20} = (+) -31.99$  ( $c = 0.5$ ,  $\text{CHCl}_3$ ).  $^1\text{H NMR}$  (500 MHz, Chloroform-*d*)  $\delta$  7.65 (d,  $J = 7.8$  Hz, 1H), 7.35 (d,  $J = 8.2$  Hz, 1H), 7.24 (d,  $J = 7.3$  Hz, 1H), 7.16 (d,  $J = 4.6$  Hz, 2H), 6.57 (d,  $J = 3.5$  Hz, 1H), 3.64 (s, 3H), 2.81 (dq,  $J = 10.0, 6.9$  Hz, 1H), 2.37 (dd,  $J = 10.2, 5.5$  Hz, 1H), 2.22–2.20 (m, 1H).  $^{13}\text{C NMR}$  (101 MHz, Chloroform-*d*)  $\delta$  170.6, 137.6, 129.6, 127.5, 124.1 (q,  $J = 272.2$  Hz), 122.5, 121.6, 120.6, 109.8, 103.9, 53.7, 41.2, 28.5 (q,  $J = 37.9$  Hz), 18.6.  $^{19}\text{F NMR}$  (470 MHz, Chloroform-*d*)  $\delta$  -62.12 (d,  $J = 7.0$  Hz). IR (neat,  $\text{cm}^{-1}$ ): 3055, 2956, 1732, 1463, 1263, 1130, 1085, 741. HPLC analysis *cis*-isomer: *e.e.* = 50%. OD-H (5% isopropanol: 95% hexane, 0.8 ml/min):  $t_{\text{minor}} = 8.7$  min,  $t_{\text{major}} = 10.6$  min. HRMS-(DART+) calculated for  $\text{C}_{14}\text{H}_{13}\text{F}_3\text{NO}_2$   $[\text{M}+\text{H}]^+$ : 284.0893, found: 284.0887.

### (8*R*,9*S*,13*S*,14*S*)-13-Methyl-3-((1*R*,2*R*)-2-(trifluoromethyl)cyclopropyl)-6,7,8,9,11,12,13,14,15,16-decahydro-17*H*-cyclopenta[*a*]phenanthren-17-one (**3ac**)

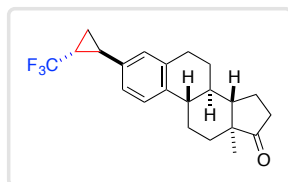

Yield: 80%. White solid. Isolated as a mixture of diastereomers *trans/cis*: 96/4.  $[\alpha]_D^{20} = (+) -43.99$  ( $c = 0.4$ ,  $\text{CHCl}_3$ ).  $^1\text{H NMR}$  (400 MHz, Chloroform-*d*)  $\delta$  7.23 (d,  $J = 8.0$  Hz, 1H), 6.90 (d,  $J = 8.3$  Hz, 1H), 6.88 (s, 1H), 2.90 (dd,  $J = 8.8, 4.1$  Hz, 2H), 2.51 (dd,  $J = 18.7, 8.8$  Hz, 1H), 2.44–2.37 (m, 1H), 2.30 (dd,  $J = 9.8, 4.6$  Hz, 1H), 2.20–2.11 (m, 1H), 2.11–2.01 (m, 2H), 1.97 (dd,  $J = 9.1, 2.5$  Hz, 1H), 1.84–1.71 (m, 1H), 1.68–1.58 (m, 2H), 1.55–1.40 (m, 5H), 1.37–1.31 (m, 1H), 1.17–1.11 (m, 1H), 0.90 (s, 3H).  $^{13}\text{C NMR}$  (101 MHz, Chloroform-*d*)  $\delta$  220.9, 138.5, 136.9, 136.7, 127.4, 125.9 (q,  $J = 229.5$  Hz), 125.8, 123.9, 50.6, 48.1, 44.4, 38.3, 36.0, 31.7, 29.5, 26.6, 25.9, 23.0 (q,  $J = 36.9$  Hz), 21.7, 19.3 (d,  $J = 3.2$  Hz), 14.0, 10.9.  $^{19}\text{F NMR}$  (376 MHz, Chloroform-*d*)  $\delta$  -66.76 (d,  $J = 6.7$  Hz). IR (neat,  $\text{cm}^{-1}$ ): 2930, 2862, 1736, 1421, 1265, 1311, 734. HRMS-(DART+) calculated for  $\text{C}_{22}\text{H}_{26}\text{F}_3\text{O}$   $[\text{M}+\text{H}]^+$ : 363.1930, found: 363.1927. The structure was characterized by X-ray crystallography.

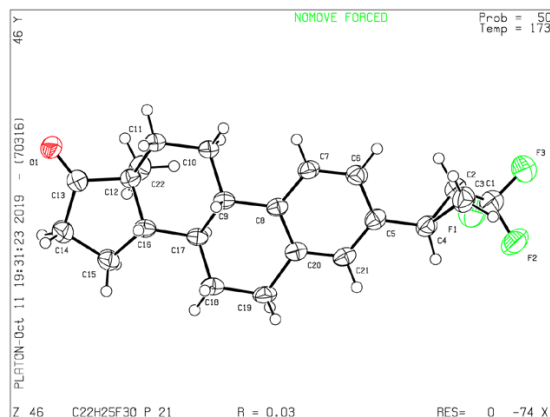

### 2-((1*R*,2*R*)-2-(Perfluoroethyl)cyclopropyl)naphthalene (**5a**)

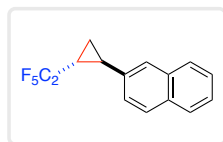

Yield: 80%. Pale yellow solid. Isolated as a mixture of diastereomers *trans/cis*: 99/1.  $[\alpha]_D^{20} = (-)-34.99$  ( $c = 0.8$ ,  $\text{CHCl}_3$ ).  $^1\text{H NMR}$  (500 MHz, Chloroform-*d*)  $\delta$  7.80 (q,  $J = 7.6$  Hz, 3H), 7.59 (s, 1H), 7.47 (p,  $J = 6.9$  Hz, 2H), 7.25 (s, 1H), 2.57 (dt,  $J = 10.1$ , 5.6 Hz, 1H), 1.76 (ddt,  $J = 17.6$ , 13.3, 6.0 Hz, 1H), 1.48 (dt,  $J = 10.3$ , 5.7 Hz, 1H), 1.37 (q,  $J = 6.8$  Hz, 1H).  $^{13}\text{C NMR}$  (126 MHz, Chloroform-*d*)  $\delta$  136.4, 133.5, 132.6, 128.6, 127.8, 127.6, 126.6, 125.9, 125.3, 125.1, 119.5 (qt,  $J = 285.8$ , 38.5 Hz), 114.3 (tq,  $J = 250.4$ , 37.5 Hz), 20.4 (t,  $J = 25.7$  Hz), 19.4 (dd,  $J = 5.0$ , 2.4 Hz), 9.9 (dd,  $J = 4.9$ , 2.4 Hz).  $^{19}\text{F NMR}$  (470 MHz, Chloroform-*d*)  $\delta$  -84.88, -119.29 (d,  $J = 12.7$  Hz), -119.85 (d,  $J = 12.7$  Hz), -120.14 (d,  $J = 13.4$  Hz), -120.70 (d,  $J = 13.3$  Hz). IR (neat,  $\text{cm}^{-1}$ ): 3020, 2926, 1346, 1205, 1080, 1037, 758. HPLC analysis *trans*-isomer: *e.e.* = 80%. OD-H (1% isopropanol: 99% hexane, 0.8 ml/min):  $t_{\text{minor}} = 31.6$  min,  $t_{\text{major}} = 35.1$  min. HRMS-(DART+) calculated for  $\text{C}_{15}\text{H}_{12}\text{F}_5$   $[\text{M}+\text{H}]^+$ : 287.0853, found: 287.0850.

### Ethyl (1*R*,2*R*)-2-phenylcyclopropane-1-carboxylate (**5b**)

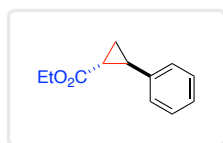

Yield: 88%. Colorless oil. Isolated as a mixture of diastereomers *trans/cis*: 99/1.  $[\alpha]_D^{20} = (-)-187.38$  ( $c = 1.0$ ,  $\text{CHCl}_3$ ).  $^1\text{H NMR}$  (500 MHz, Chloroform-*d*)  $\delta$  7.27 (d,  $J = 7.6$  Hz, 2H), 7.20 (t,  $J = 7.4$  Hz, 1H), 7.10 (d,  $J = 7.1$  Hz, 2H), 4.17 (q,  $J = 7.1$  Hz, 2H), 2.56 – 2.48 (m, 1H), 1.94 – 1.87 (m, 1H), 1.60 (dt,  $J = 9.4$ , 4.9 Hz, 1H), 1.34 – 1.30 (m, 1H), 1.28 (t,  $J = 7.2$  Hz, 3H).  $^{13}\text{C NMR}$  (126 MHz, Chloroform-*d*)  $\delta$  173.6, 140.3, 128.6, 126.6, 126.3, 60.8, 26.3, 24.3, 17.2, 14.4. IR (neat,  $\text{cm}^{-1}$ ): 3024, 2982, 1723, 1438, 1337, 1217, 1186, 754. HPLC analysis *trans*-isomer: *e.e.* = 80%. OJ-H (0.1% isopropanol: 99.9% hexane, 0.8 ml/min):  $t_{\text{major}} = 14.2$  min,  $t_{\text{minor}} = 27.4$  min. HRMS-(DART+) calculated for  $\text{C}_{12}\text{H}_{15}\text{O}_2$   $[\text{M}+\text{H}]^+$ : 191.1066, found: 191.1074.

### ***tert*-Butyl (1*R*,2*R*)-2-phenylcyclopropane-1-carboxylate (5c)**

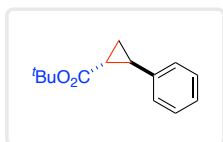

Yield: 82%. Colorless oil. Isolated as a mixture of diastereomers *trans/cis*: 99/1.  $[\alpha]_D^{20} = (-)-118.98$  ( $c = 0.8$ ,  $\text{CHCl}_3$ ).  $^1\text{H NMR}$  (500 MHz, Chloroform-*d*)  $\delta$  7.28 (t,  $J = 7.7$  Hz, 2H), 7.19 (t,  $J = 7.4$  Hz, 1H), 7.09 (d,  $J = 7.3$  Hz, 2H), 2.44 (ddd,  $J = 9.7$ , 6.3, 4.2 Hz, 1H), 1.84 (dt,  $J = 8.8$ , 4.7 Hz, 1H), 1.53 (dt,  $J = 9.5$ , 4.9 Hz, 1H), 1.47 (s, 9H), 1.26 – 1.22 (m, 1H).  $^{13}\text{C NMR}$  (126 MHz, Chloroform-*d*)  $\delta$  172.7, 140.7, 128.6, 126.5, 126.2, 80.7, 28.3, 25.9, 25.4, 17.2. IR (neat,  $\text{cm}^{-1}$ ): 2978, 1718, 1402, 1367, 1342, 1220, 1151, 756. HPLC analysis *trans*-isomer: *e.e.* = 48%. OJ-H (0.1% isopropanol: 99.9% hexane, 0.8 ml/min):  $t_{\text{major}} = 7.8$  min,  $t_{\text{minor}} = 9.2$  min. HRMS-(DART+) calculated for  $\text{C}_{14}\text{H}_{19}\text{O}_2$   $[\text{M}+\text{H}]^+$ : 219.1379, found: 219.1384.

### **Ethyl 2-phenyl-1-(trifluoromethyl)cyclopropane-1-carboxylate (5d)**

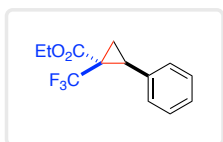

Yield: 43%. Colorless oil. Isolated as a mixture of diastereomers *trans/cis*: 6/94.  $[\alpha]_D^{20} = (+)-33.99$  ( $c = 0.4$ ,  $\text{CHCl}_3$ ).  $^1\text{H NMR}$  (500 MHz, Chloroform-*d*)  $\delta$  7.30 (d,  $J = 7.0$  Hz, 5H), 4.30 (p,  $J = 6.3$  Hz, 2H), 3.09 (t,  $J = 9.0$  Hz, 1H), 1.93 (dq,  $J = 8.8$ , 5.5 Hz, 2H), 1.34 (t,  $J = 7.1$  Hz, 3H).  $^{13}\text{C NMR}$  (126 MHz, Chloroform-*d*)  $\delta$  168.5, 133.6, 129.6, 128.4, 127.8, 124.2 (q,  $J = 274.3$  Hz), 62.2, 33.1 (q,  $J = 32.8$  Hz), 32.4, 16.3, 14.2.  $^{19}\text{F NMR}$  (471 MHz, Chloroform-*d*)  $\delta$  -61.14. IR (neat,  $\text{cm}^{-1}$ ): 2983, 2926, 1731, 1381, 1286, 1146, 1097, 767. HPLC analysis *cis*-isomer: *e.e.* = 35%. (*R,R*)-Whelk-O1 (0.1% isopropanol: 99.9% hexane, 0.8 ml/min):  $t_{\text{major}} = 9.5$  min,  $t_{\text{minor}} = 10.2$  min. HRMS-(DART+) calculated for  $\text{C}_{13}\text{H}_{14}\text{O}_2\text{F}_3$   $[\text{M}+\text{H}]^+$ : 259.0940, found: 259.0950.

### **1-Methyl 1-(naphthalen-2-yl) (1*S*,2*R*)-2-phenylcyclopropane-1,1-dicarboxylate (5e)**

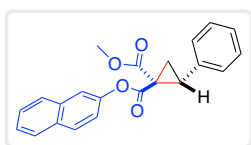

Yield: 74%. White solid. Isolated as a mixture of diastereomers *trans/cis*: 99/1.  $[\alpha]_D^{20} = (+)-109.59$  ( $c = 1.0$ ,  $\text{CHCl}_3$ ).  $^1\text{H NMR}$  (600 MHz, Chloroform-*d*)  $\delta$  7.87 (dd,  $J = 10.4$ , 8.0 Hz, 2H), 7.82 (d,  $J = 7.9$  Hz, 1H), 7.64 (d,  $J = 2.4$  Hz, 1H), 7.54 – 7.46 (m, 2H), 7.34 – 7.27 (m, 6H), 3.46 (s, 3H), 3.42 (t,  $J = 8.7$  Hz, 1H), 2.39 (dd,  $J = 8.2$ , 5.3 Hz, 1H), 1.96 (dd,  $J = 9.2$ , 5.3 Hz, 1H).  $^{13}\text{C NMR}$  (101 MHz, Chloroform-*d*)  $\delta$  168.8, 166.9, 148.4, 134.4, 133.8, 131.7, 129.6, 128.7, 128.4, 127.9, 127.8, 127.7, 126.8, 126.0, 121.0, 118.6, 52.6, 37.6, 33.3, 19.9. IR (neat,  $\text{cm}^{-1}$ ): 2919, 1735, 1511, 1333, 1240, 1175, 962, 758. HPLC analysis *trans*-isomer: *e.e.* = 76%. IC (2% isopropanol: 98% hexane, 0.8 ml/min):  $t_{\text{major}} = 19.8$  min,  $t_{\text{minor}} = 23.4$  min. HRMS-(DART+) calculated for  $\text{C}_{22}\text{H}_{19}\text{O}_4$   $[\text{M}+\text{H}]^+$ : 347.1277, found: 347.1268.

### 1-(Trifluoromethyl)cyclopropane-1,2-diyl)dibenzene (5f)

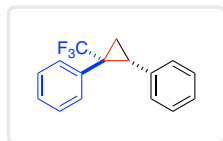

Yield: 75%. Colorless oil. Isolated as a mixture of diastereomers *trans/cis*: 46/54. <sup>1</sup>H NMR (500 MHz, Chloroform-*d*) δ 7.63 – 7.59 (m, 2H), 7.46 – 7.28 (m, 8H), 2.74 (t, *J* = 8.4 Hz, 1H), 1.96 (dd, *J* = 7.4, 5.6 Hz, 1H), 1.61 (ddt, *J* = 9.3, 5.5, 1.9 Hz, 1H). <sup>13</sup>C NMR (126 MHz, Chloroform-*d*) δ 137.4, 135.5, 131.3, 129.5, 128.7, 128.4, 128.0, 127.2, 126.0 (q, *J* = 274.9 Hz), 35.2 (q, *J* = 31.5 Hz), 29.5, 14.0 (q, *J* = 2.5 Hz). <sup>19</sup>F NMR (471 MHz, Chloroform-*d*) δ -63.67. IR (neat, cm<sup>-1</sup>): 3028, 1602, 1495, 1449, 1356, 1280, 1132, 966. HPLC analysis *cis*-isomer: *e.e.* = 3%. OJ-H (0.1% isopropanol: 99.9% hexane, 0.8 ml/min): *t*<sub>major</sub> = 23.3 min, *t*<sub>minor</sub> = 26.3 min. HRMS-(DART+) calculated for C<sub>16</sub>H<sub>14</sub>F<sub>3</sub> [M+H]<sup>+</sup>: 263.1042, found: 263.1040.

### 1-Methoxy-2-((1*S*,2*S*)-2-phenylcyclopropyl)benzene (5g)

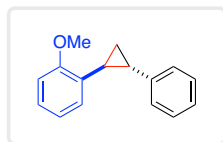

Yield: 98%. White solid. Isolated as a mixture of diastereomers *trans/cis*: 99/1. [α]<sub>D</sub><sup>20</sup> = (+)-238.78 (*c* = 1.5, CHCl<sub>3</sub>). <sup>1</sup>H NMR (500 MHz, Chloroform-*d*) δ 7.34 (t, *J* = 7.6 Hz, 2H), 7.29 – 7.19 (m, 4H), 7.03 (d, *J* = 7.1 Hz, 1H), 6.97 (t, *J* = 7.4 Hz, 1H), 6.91 (d, *J* = 8.2 Hz, 1H), 3.88 (s, 3H), 2.57 – 2.49 (m, 1H), 2.23 – 2.14 (m, 1H), 1.45 (d, *J* = 6.6 Hz, 2H). <sup>13</sup>C NMR (126 MHz, Chloroform-*d*) δ 158.3, 143.1, 131.0, 128.4, 126.8, 126.3, 125.7, 125.2, 120.6, 110.4, 55.6, 26.7, 21.8, 17.2. IR (neat, cm<sup>-1</sup>): 3027, 2834, 1602, 1494, 1458, 1246, 1029, 749. HPLC analysis *trans*-isomer: *e.e.* = 95%. IA (0.1% isopropanol: 99.9% hexane, 0.8 ml/min): *t*<sub>minor</sub> = 6.7 min, *t*<sub>major</sub> = 7.0 min. HRMS-(DART+) calculated for C<sub>16</sub>H<sub>17</sub>O [M+H]<sup>+</sup>: 225.1273, found: 225.1275.

### 1,3-Difluoro-5-methoxy-2-((1*S*,2*S*)-2-phenylcyclopropyl)benzene (5h)

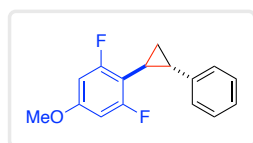

Yield: 97%. Colorless oil. Isolated as a mixture of diastereomers *trans/cis*: 95/5. [α]<sub>D</sub><sup>20</sup> = (+)-180.46 (*c* = 1.7, CHCl<sub>3</sub>). <sup>1</sup>H NMR (500 MHz, Chloroform-*d*) δ 7.31 (t, *J* = 7.6 Hz, 2H), 7.21 (d, *J* = 7.8 Hz, 3H), 6.42 (d, *J* = 9.6 Hz, 2H), 3.77 (s, 3H), 2.41 – 2.33 (m, 1H), 2.03 – 1.95 (m, 1H), 1.54 (d, *J* = 8.7 Hz, 1H), 1.40 (dt, *J* = 10.4, 5.6 Hz, 1H). <sup>13</sup>C NMR (126 MHz, CDCl<sub>3</sub>) δ 162.8 (d, *J* = 246.0 Hz), 162.7 (d, *J* = 246.0 Hz), 159.0, 142.5, 128.5, 126.3, 126.0, 109.8 (t, *J* = 17.7 Hz), 98.2, 97.9, 55.8, 24.0 (t, *J* = 2.5 Hz), 16.7 (t, *J* = 2.6 Hz), 15.5 (t, *J* = 3.1 Hz). <sup>19</sup>F NMR (471 MHz, Chloroform-*d*) δ -113.43 (d, *J* = 9.6 Hz). IR (neat, cm<sup>-1</sup>): 3015, 2938, 1638, 1580, 1440, 1344, 1142, 1043. HPLC analysis *trans*-isomer: *e.e.* = 90%. IA (0.1% isopropanol: 99.9% hexane, 0.8 ml/min): *t*<sub>major</sub> = 7.0 min, *t*<sub>minor</sub> = 8.0 min. HRMS-(DART+) calculated for C<sub>16</sub>H<sub>15</sub>OF<sub>2</sub> [M+H]<sup>+</sup>: 261.1085, found: 261.1084.

### 2-((1*S*,2*S*)-2-Phenylcyclopropyl)thiophene (**5i**)

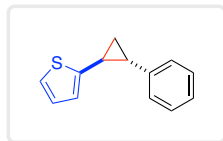

Yield: 63%. Colorless oil. Isolated as a mixture of diastereomers *trans/cis*: 70/30.  $[\alpha]_D^{20} = (+)-22.49$  ( $c = 0.5$ ,  $\text{CHCl}_3$ ).  $^1\text{H NMR}$  (500 MHz, Chloroform-*d*)  $\delta$  7.30 (t,  $J = 7.5$  Hz, 2H), 7.19 (t,  $J = 7.3$  Hz, 1H), 7.14 (d,  $J = 7.6$  Hz, 2H), 7.08 (d,  $J = 5.1$  Hz, 1H), 6.93 (q,  $J = 5.4$  Hz, 1H), 6.83 (d,  $J = 3.5$  Hz, 1H), 2.37 (dt,  $J = 9.4, 5.3$  Hz, 1H), 2.22 (dt,  $J = 9.9, 5.2$  Hz, 1H), 1.47 (ddt,  $J = 13.5, 8.8, 5.6$  Hz, 2H).  $^{13}\text{C NMR}$  (126 MHz, Chloroform-*d*)  $\delta$  147.1, 142.0, 128.6, 127.0, 126.1, 126.0, 122.9, 122.4, 28.8, 23.3, 19.3. IR (neat,  $\text{cm}^{-1}$ ): 3026, 2922, 1604, 1499, 1458, 1040, 763. HPLC analysis *trans*-isomer: *e.e.* = 20%. OJ-H (2% isopropanol: 98% hexane, 0.8 ml/min):  $t_{\text{minor}} = 12.1$  min,  $t_{\text{major}} = 17.6$  min. HRMS-(DART+) calculated for  $\text{C}_{13}\text{H}_{13}\text{S}$   $[\text{M}+\text{H}]^+$ : 201.0732, found: 201.0736.

### (((1*R*,2*R*)-2-phenylcyclopropyl)ethynyl)benzene (**5j**)

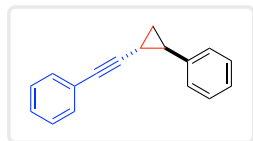

Yield: 24%. Colorless oil. Isolated as a mixture of diastereomers *trans/cis*: 99/1.  $[\alpha]_D^{20} = (-)-60.99$  ( $c = 0.4$ ,  $\text{CHCl}_3$ ).  $^1\text{H NMR}$  (500 MHz, Chloroform-*d*)  $\delta$  7.43 – 7.37 (m, 2H), 7.36 – 7.27 (m, 5H), 7.20 (t,  $J = 7.4$  Hz, 1H), 7.13 (d,  $J = 7.5$  Hz, 2H), 2.37 (dt,  $J = 9.8, 5.5$  Hz, 1H), 1.71 (dt,  $J = 9.5, 5.1$  Hz, 1H), 1.43 (dt,  $J = 9.4, 5.3$  Hz, 1H), 1.35 (dt,  $J = 8.8, 5.6$  Hz, 1H).  $^{13}\text{C NMR}$  (126 MHz, Chloroform-*d*)  $\delta$  140.9, 131.8, 128.6, 128.4, 127.8, 126.4, 126.1, 123.8, 92.0, 77.4, 26.7, 18.2, 12.2. IR (neat,  $\text{cm}^{-1}$ ): 3029, 2919, 2226, 1598, 1491, 1216, 1070, 753. HPLC analysis *trans*-isomer: *e.e.* = 89%. IB (0.1% isopropanol: 99.9% hexane, 0.8 ml/min):  $t_{\text{major}} = 10.1$  min,  $t_{\text{minor}} = 10.6$  min. HRMS-(DART+) calculated for  $\text{C}_{17}\text{H}_{15}$   $[\text{M}+\text{H}]^+$ : 219.1168, found: 219.1176.

### Cyclopropane-1,1,2-triyltribenzene (**5k**)

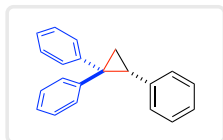

Yield: 98%. Colorless oil.  $^1\text{H NMR}$  (500 MHz, Chloroform-*d*)  $\delta$  7.34 – 7.26 (m, 4H), 7.22 – 7.02 (m, 9H), 6.91 – 6.85 (m, 2H), 2.87 (dd,  $J = 9.0, 6.6$  Hz, 1H), 2.00 (dd,  $J = 6.6, 5.4$  Hz, 1H), 1.82 (dd,  $J = 9.0, 5.4$  Hz, 1H).  $^{13}\text{C NMR}$  (126 MHz, Chloroform-*d*)  $\delta$  147.2, 140.3, 138.8, 131.3, 128.5, 128.07, 128.05, 127.8, 127.6, 126.4, 126.0, 125.7, 39.5, 32.5, 21.0. IR (neat,  $\text{cm}^{-1}$ ): 3057, 3024, 1599, 1496, 1445, 1074, 1030, 735. HPLC analysis: *e.e.* = 1%. IB (0.1% isopropanol: 99.9% hexane, 0.8 ml/min):  $t_{\text{minor}} = 7.3$  min,  $t_{\text{major}} = 7.5$  min. HRMS-(DART+) calculated for  $\text{C}_{21}\text{H}_{19}$   $[\text{M}+\text{H}]^+$ : 271.1481, found: 271.1487.

**(2-(2-(trifluoromethyl)cyclopropyl)ethyl)benzene (3ad)**

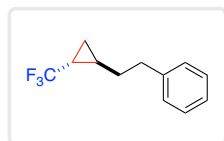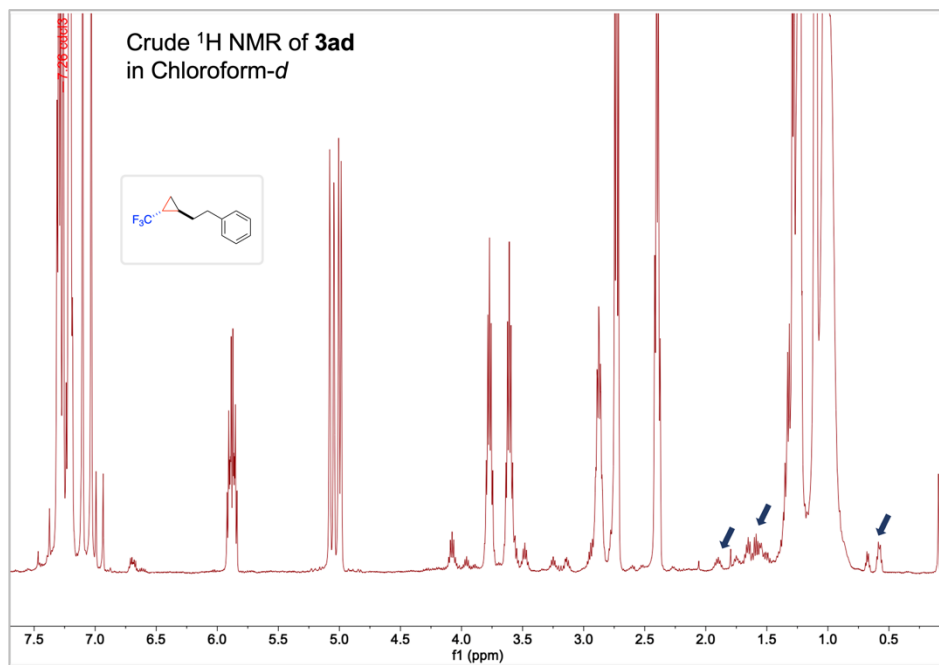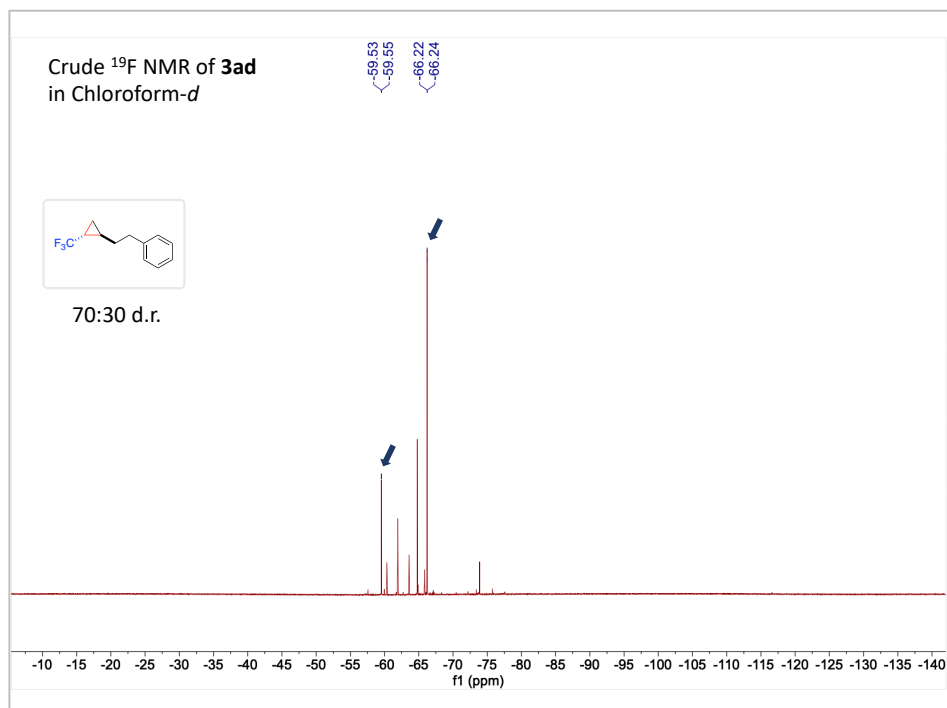

**Figure S2:** Crude NMR Analysis of **3ad**

**2-(2-(2-(trifluoromethyl)cyclopropyl)ethyl)isoindoline-1,3-dione (3ae)**

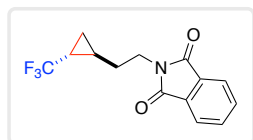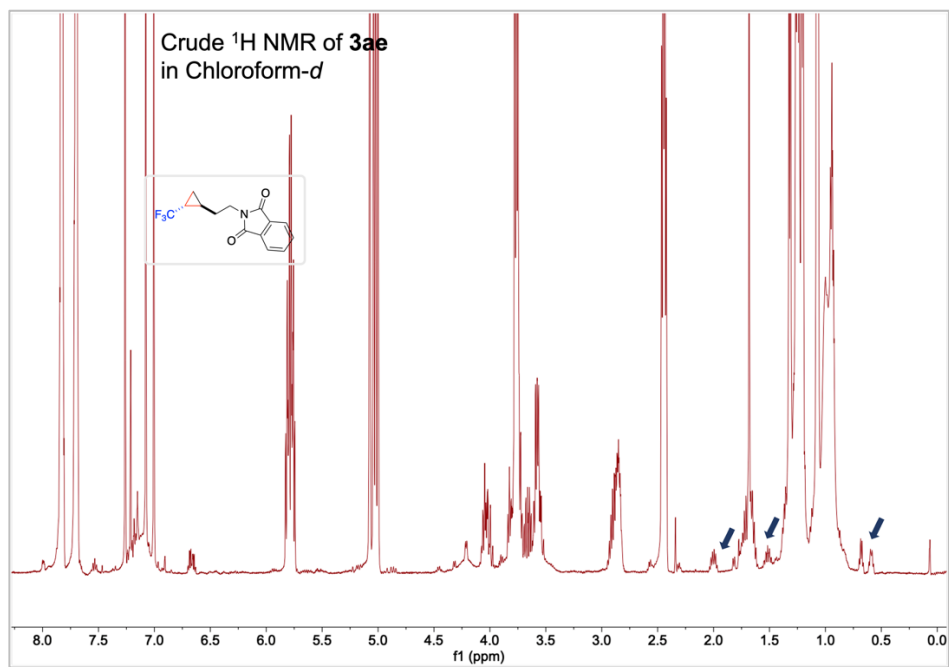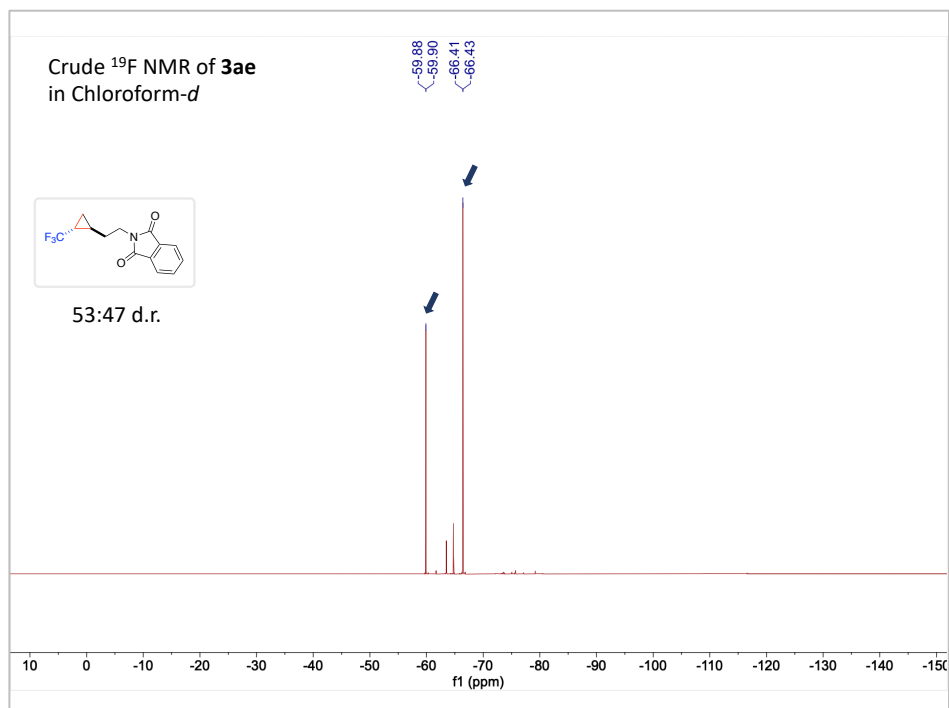

**Figure S3:** Crude NMR Analysis of **3ae**



### 1-(Trifluoromethyl)-1a,6b-dihydro-1H-cyclopropa[b]benzofuran (3af)

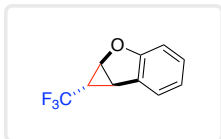

97/3 d.r. determined by  $^{19}\text{F}$  NMR analysis of reaction mixture. Isolated as a mixture of diastereomers: 99/1 d.r..  $^1\text{H}$  NMR (500 MHz, Chloroform- $d$ )  $\delta$  7.41 (d,  $J = 7.0$  Hz, 1H), 7.18 (td,  $J = 7.8, 1.4$  Hz, 1H), 6.95 (td,  $J = 7.5, 1.0$  Hz, 1H), 6.89 (d,  $J = 8.1$  Hz, 1H), 4.98 (dd,  $J = 6.0, 1.4$  Hz, 1H), 3.11 (dd,  $J = 6.0, 3.5$  Hz, 1H), 1.57 (m, 1H).  $^{19}\text{F}$  NMR (471 MHz, Chloroform- $d$ )  $\delta$  -64.26 (d,  $J = 7.2$  Hz).

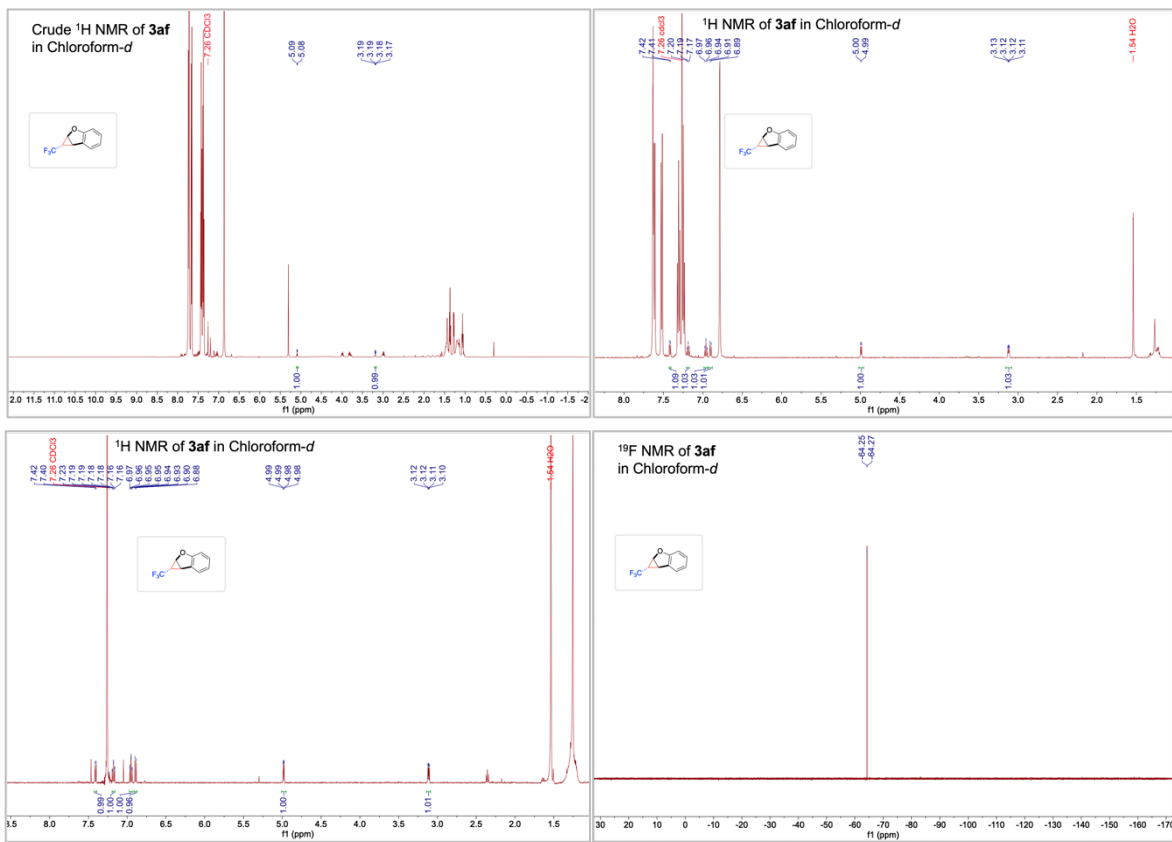

Figure S4: Crude NMR Analysis of **3af**

## 6. Mechanistic Studies

### 6.1. Comparative Studies on Catalytic Reactions under Inert and Air Atmospheres

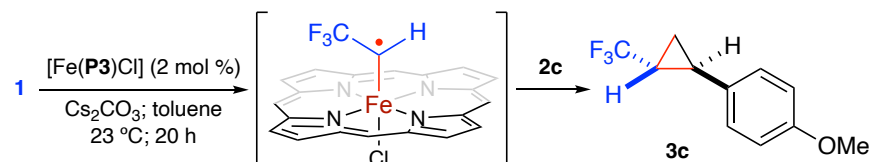

An oven-dried Schlenk tube was charged with 1.0 equivalent of olefin (0.1 mmol), 1.2 equivalents of hydrazone **1** (0.12 mmol),  $[\text{Fe}(\text{P}3)\text{Cl}]$  (2 mol %) and 2.4 equivalents of  $\text{Cs}_2\text{CO}_3$  (0.24 mmol). The Schlenk tube was then evacuated and back filled with nitrogen three times (*skip this step if conducting the reaction under air*). The Teflon screw cap was replaced with a rubber septum, and toluene (1 mL) was added. The mixture was stirred at rt. After 20 h, the reaction mixture was filtered through a plug of silica and then concentrated *in vacuo*. The residue was purified via a flash chromatography to afford the compound as a mixture of *trans/cis* diastereomers.

| entry | atmosphere     | yield (%) | d.r. ( <i>trans:cis</i> ) | e.e. (%) |
|-------|----------------|-----------|---------------------------|----------|
| 1     | N <sub>2</sub> | 95        | 93:7                      | 80       |
| 2     | Air            | 93        | 93:7                      | 80       |

#### Entry 1

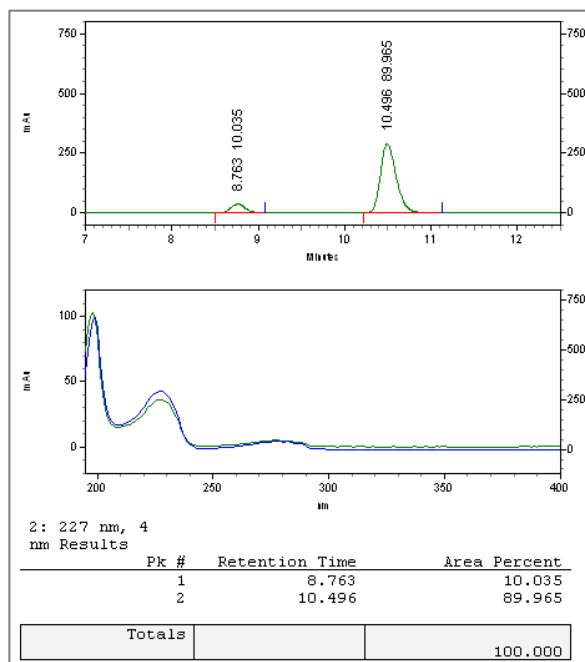

#### Entry 2

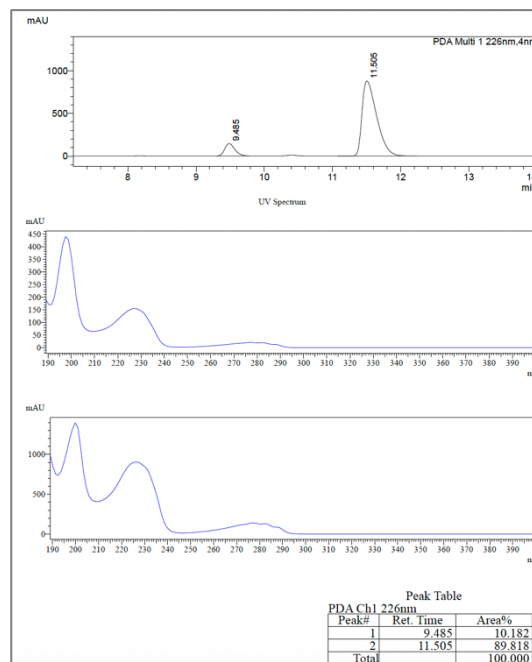

Figure S5: HPLC Analysis of **3c**

## 6.2. Comparative Studies on Catalytic Reactions with Ligand

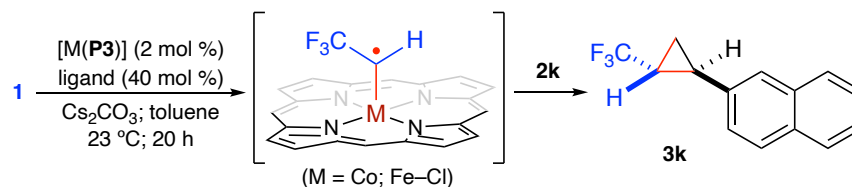

An oven-dried Schlenk tube was charged with 1.0 equivalent of olefin (0.1 mmol), 1.2 equivalents of hydrazone **1** (0.12 mmol), catalyst ([Fe(**P3**)Cl] or [Co(**P3**)] (2 mol %), DMAP (40 mol %) (*skip adding this additive if conducting the comparison experiments*) and 2.4 equivalents of Cs<sub>2</sub>CO<sub>3</sub> (0.24 mmol). The Schlenk tube was then evacuated and back filled with nitrogen three times. The Teflon screw cap was replaced with a rubber septum, and toluene (1 mL) was added. The Schlenk tube was then purged with nitrogen for 30 sec and the rubber septum was replaced with a Teflon screw cap. The mixture was stirred at rt. After 20 h, the reaction mixture was filtered through a plug of silica and then concentrated *in vacuo*. The residue was purified via a flash chromatography to afford the compound as a mixture of *trans/cis* diastereomers.

| entry | catalyst            | ligand | yield (%) | d.r. ( <i>trans:cis</i> ) | e.e. (%) |
|-------|---------------------|--------|-----------|---------------------------|----------|
| 1     | [Fe( <b>P3</b> )Cl] | –      | 99        | 98:2                      | 86       |
| 2     | [Fe( <b>P3</b> )Cl] | DMAP   | 82        | 98:2                      | 86       |
| 3     | [Co( <b>P3</b> )]   | –      | 99        | 99:1                      | 75       |
| 4     | [Co( <b>P3</b> )]   | DMAP   | 93        | 98:2                      | 64       |

Entry 1

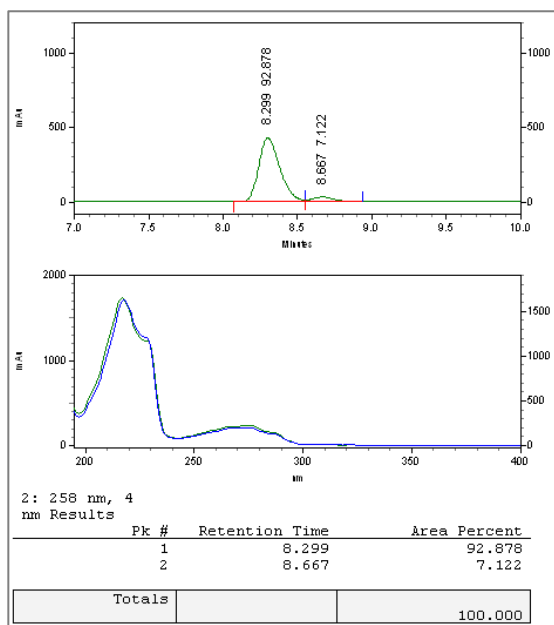

Entry 2

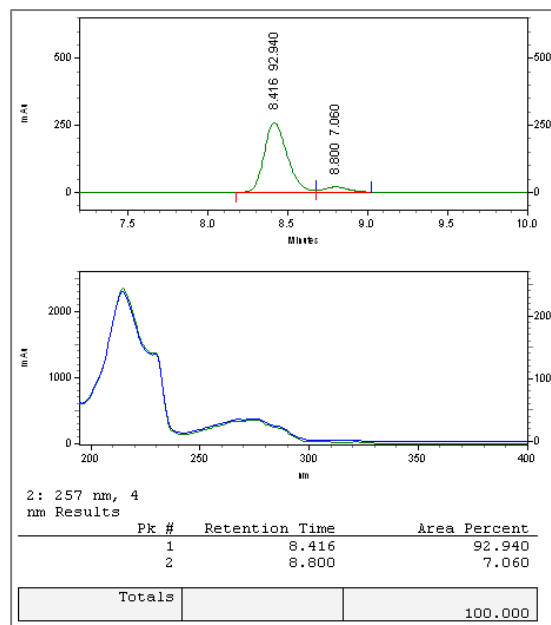

Figure S6: HPLC Analysis of **3**

| entry | catalyst            | ligand | yield (%) | d.r. ( <i>trans</i> : <i>cis</i> ) | e.e. (%) |
|-------|---------------------|--------|-----------|------------------------------------|----------|
| 1     | [Fe( <b>P3</b> )Cl] | –      | 99        | 98:2                               | 86       |
| 2     | [Fe( <b>P3</b> )Cl] | DMAP   | 82        | 98:2                               | 86       |
| 3     | [Co( <b>P3</b> )]   | –      | 99        | 99:1                               | 75       |
| 4     | [Co( <b>P3</b> )]   | DMAP   | 93        | 98:2                               | 64       |

### Entry 3

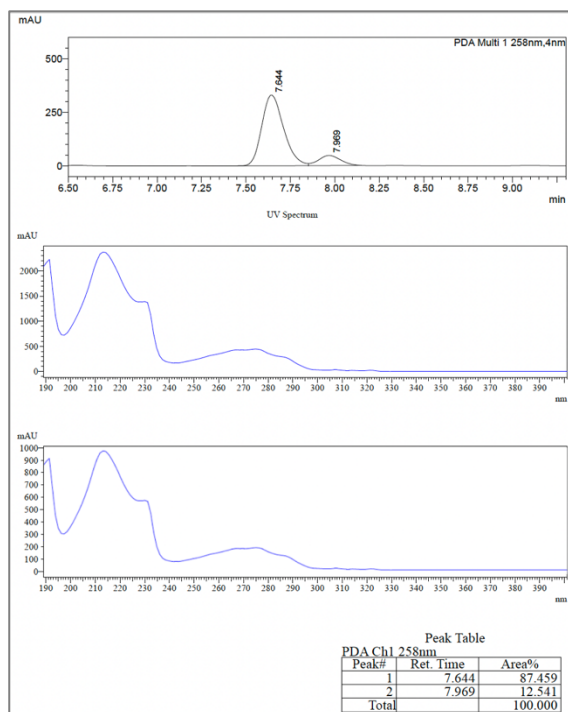

### Entry 4

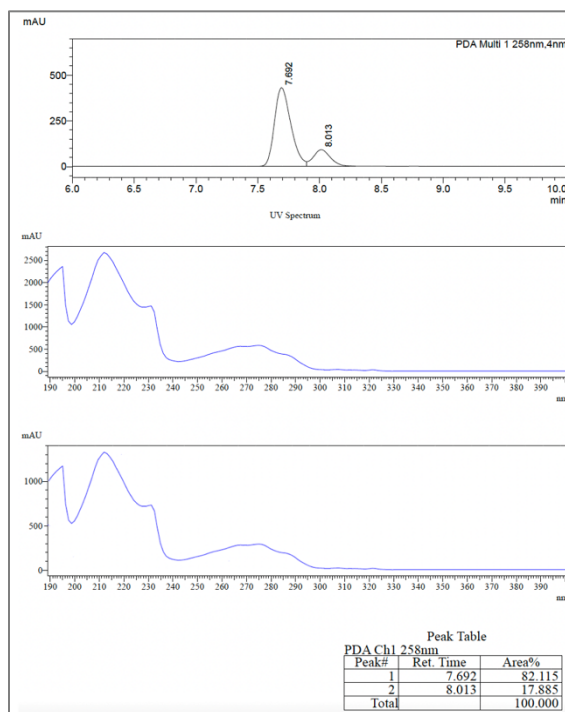

**Figure S7: HPLC Analysis of 3k**

### 6.3. Detection of Radical Intermediates by HRMS

(HRMS = High-Resolution Mass Spectrometry)

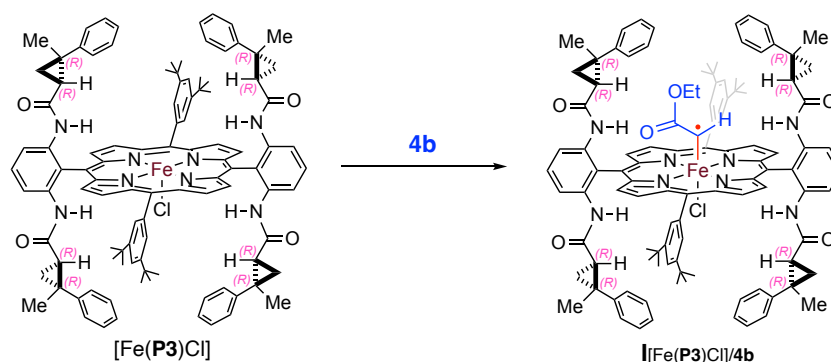

An oven-dried Schlenk tube was charged with 1.0 equivalent of diazo **4b** (0.1 mmol) and  $[\text{Fe}(\mathbf{P3})\text{Cl}]$  (2 mol %). The Schlenk tube was then evacuated and back filled with nitrogen three times. The Teflon screw cap was replaced with a rubber septum, and toluene (1 mL) was added. The mixture was stirred at 40 °C for 1 h, then the resulting solution was collected in a HPLC vial (degassed and backfilled with nitrogen). The sample was further diluted with  $\text{CH}_3\text{CN}$  and immediately injected into HRMS instrument for the detection of the molecular ion signals.

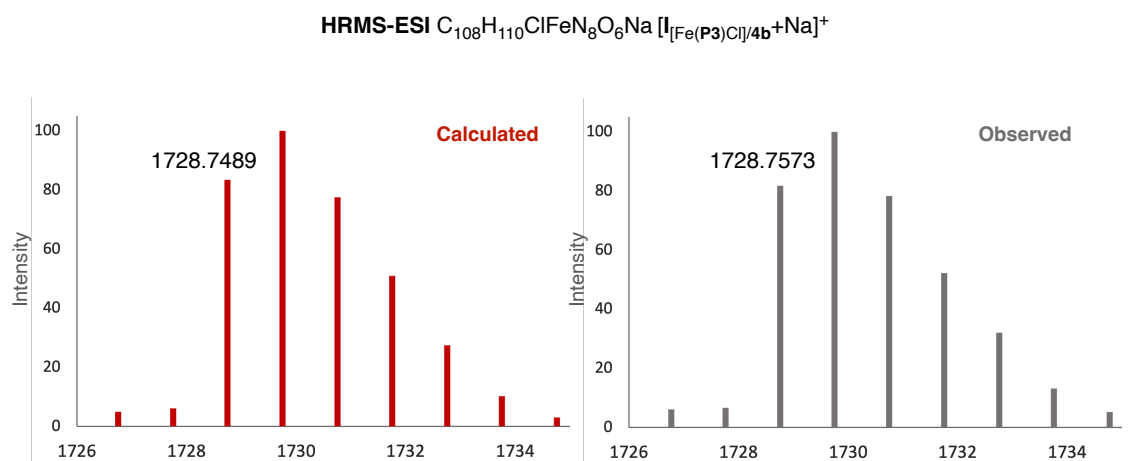

**Figure S8:** HRMS Analysis of  $[\text{I}_{[\text{Fe}(\mathbf{P3})\text{Cl}]/\mathbf{4b}+\text{Na}}]^+$

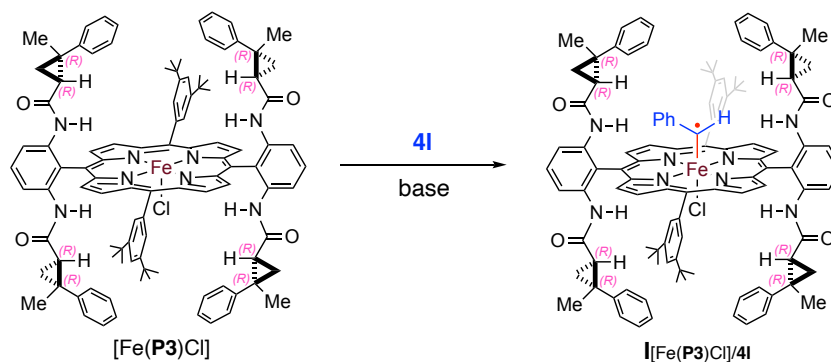

An oven-dried Schlenk tube was charged with 1.0 equivalent of trisylhydrazone **4I** (0.1 mmol),  $[\text{Fe}(\text{P3})\text{Cl}]$  (2 mol %) and 2.0 equivalents of  $\text{Cs}_2\text{CO}_3$  (0.2 mmol). The Schlenk tube was then evacuated and back filled with nitrogen three times. The Teflon screw cap was replaced with a rubber septum, and toluene (1 mL) was added. The mixture was stirred at 40 °C for 1 h, then the resulting solution was collected in a HPLC vial (degassed and backfilled with nitrogen). The sample was further diluted with  $\text{CH}_3\text{CN}$  and immediately injected into HRMS instrument for the detection of the molecular ion signals.

**HRMS-ESI**  $\text{C}_{111}\text{H}_{110}\text{ClFeN}_8\text{O}_4\text{K} [\text{I}[\text{Fe}(\text{P3})\text{Cl}]4\text{I}+\text{K}]^+$

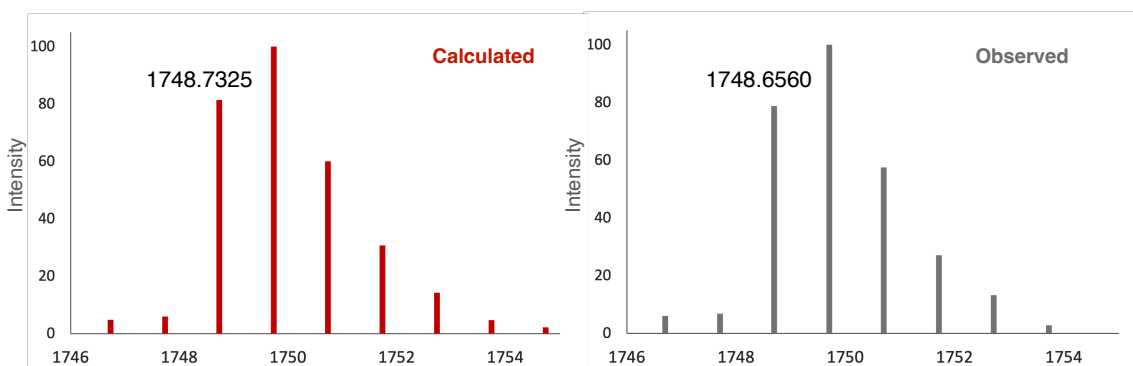

**Figure S9:** HRMS Analysis of  $[\text{I}[\text{Fe}(\text{P3})\text{Cl}]4\text{I}+\text{K}]^+$

#### 6.4. Determination of Magnetic Susceptibility in [Fe(Por)Cl]

Magnetic susceptibility data of [Fe(Por)Cl] in the solid phase were collected using Quantum Design MPMS SQUID magnetometer over the temperature range from 6 to 300K. (SQUID = superconducting quantum interference device)

**Figure S10:** Variable Temperature SQUID Measurements of [Fe(P3)Cl]

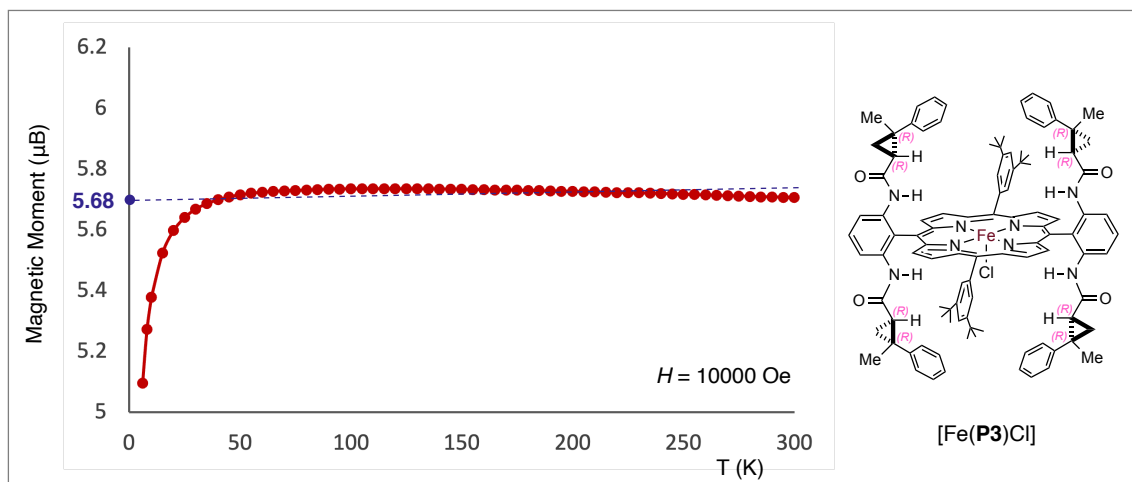

| Temp (K) | Mag(μB) |
|----------|---------|
| 6.00155  | 5.09555 |
| 8.00213  | 5.27258 |
| 10.00178 | 5.37878 |
| 10.00186 | 5.37885 |
| 15.00077 | 5.52322 |
| 20.00042 | 5.59730 |
| 25.00009 | 5.64055 |
| 30.00021 | 5.66811 |
| 35.00000 | 5.68630 |
| 39.99949 | 5.69886 |
| 44.99803 | 5.70861 |
| 49.99618 | 5.71536 |
| 54.99284 | 5.72015 |
| 59.98915 | 5.72371 |
| 64.98427 | 5.72637 |
| 69.97984 | 5.72808 |
| 74.97398 | 5.72946 |

|           |         |
|-----------|---------|
| 79.96930  | 5.73057 |
| 84.96201  | 5.73153 |
| 89.95946  | 5.73371 |
| 94.95320  | 5.73425 |
| 99.94865  | 5.73446 |
| 104.94364 | 5.73473 |
| 109.94061 | 5.73478 |
| 114.93759 | 5.73484 |
| 119.93421 | 5.73485 |
| 124.93184 | 5.73473 |
| 129.92999 | 5.73463 |
| 134.92754 | 5.73444 |
| 139.92593 | 5.73409 |
| 144.92191 | 5.73367 |
| 149.92252 | 5.73301 |
| 154.92107 | 5.73255 |
| 159.91959 | 5.73207 |
| 164.91884 | 5.73136 |
| 169.91755 | 5.73102 |
| 174.91468 | 5.73047 |
| 179.91461 | 5.72964 |
| 184.91448 | 5.72861 |
| 189.91376 | 5.72764 |
| 194.91304 | 5.72690 |
| 199.91243 | 5.72653 |
| 204.91103 | 5.72531 |
| 209.90857 | 5.72465 |
| 214.91053 | 5.72358 |
| 219.91212 | 5.72280 |
| 224.91045 | 5.72198 |
| 229.90924 | 5.72150 |
| 234.90908 | 5.72040 |
| 239.91125 | 5.71922 |
| 244.90933 | 5.71816 |
| 249.90703 | 5.71713 |
| 254.90788 | 5.71579 |



|           |         |
|-----------|---------|
| 259.90919 | 5.71497 |
| 264.90790 | 5.71338 |
| 269.90866 | 5.71248 |
| 274.90843 | 5.71125 |
| 279.90991 | 5.70988 |
| 284.91069 | 5.70861 |
| 289.90897 | 5.70837 |
| 294.90724 | 5.70717 |
| 299.90717 | 5.70607 |

**Evans Method:** The NMR sample was prepared by mixing solvent ( $\text{CDCl}_3:\text{CHCl}_3 = 50:1$  v/v) and 4.8 mg of  $[\text{Fe}(\mathbf{P3})\text{Cl}]$ . An amount of the stock solution ( $\text{CDCl}_3:\text{CHCl}_3 = 50:1$  v/v) was transferred to a capillary tube and the capillary tube was sealed by flame then inserted into the NMR tube. Magnetic susceptibility was measured based on the chemical shift difference ( $\Delta\delta = 0.307$  ppm) of the  $\text{CHCl}_3$  signal between the inner and the outer tube, which caused by one of the  $\text{CHCl}_3$  peak has been paramagnetically shifted by the paramagnetic sample in the outer tube. Effective magnetic moment ( $\mu_{\text{eff}}$ ) was calculated by Evans method analysis according to literature.<sup>1</sup> Magnetic susceptibility of  $[\text{Fe}(\mathbf{P3})\text{Cl}]$ :  $\mu_{\text{eff}} = 5.62 \mu\text{B}$  ( $\text{CDCl}_3$ , 500 MHz, 298K).

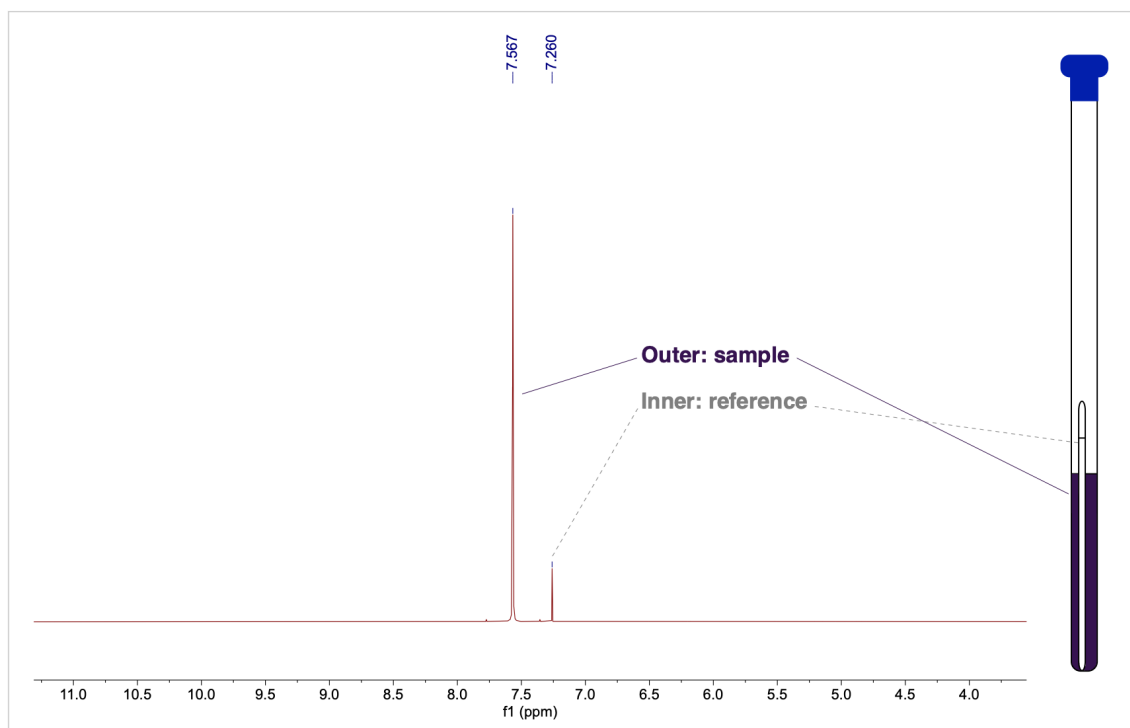

**Figure S11:**  $^1\text{H}$  NMR Spectrum of Evans Method on  $[\text{Fe}(\mathbf{P3})\text{Cl}]$  and Schematic Diagram of NMR Tube

## 6.5. Determination of Iron Spin States in [Fe(Por)Cl] by EPR

The EPR spectrum of [Fe(P3)Cl] in dichloromethane were recorded on a Bruker EMX-Plus spectrometer over the temperature range from 13 to 298K. [The simulation of the EPR spectrum was performed by iteration of the isotropic g-values and line widths using the EPR simulation program SpinFit Xenon]

**Figure S12:** EPR Spectra and Simulation of [Fe(P3)Cl] at Variable Temperature

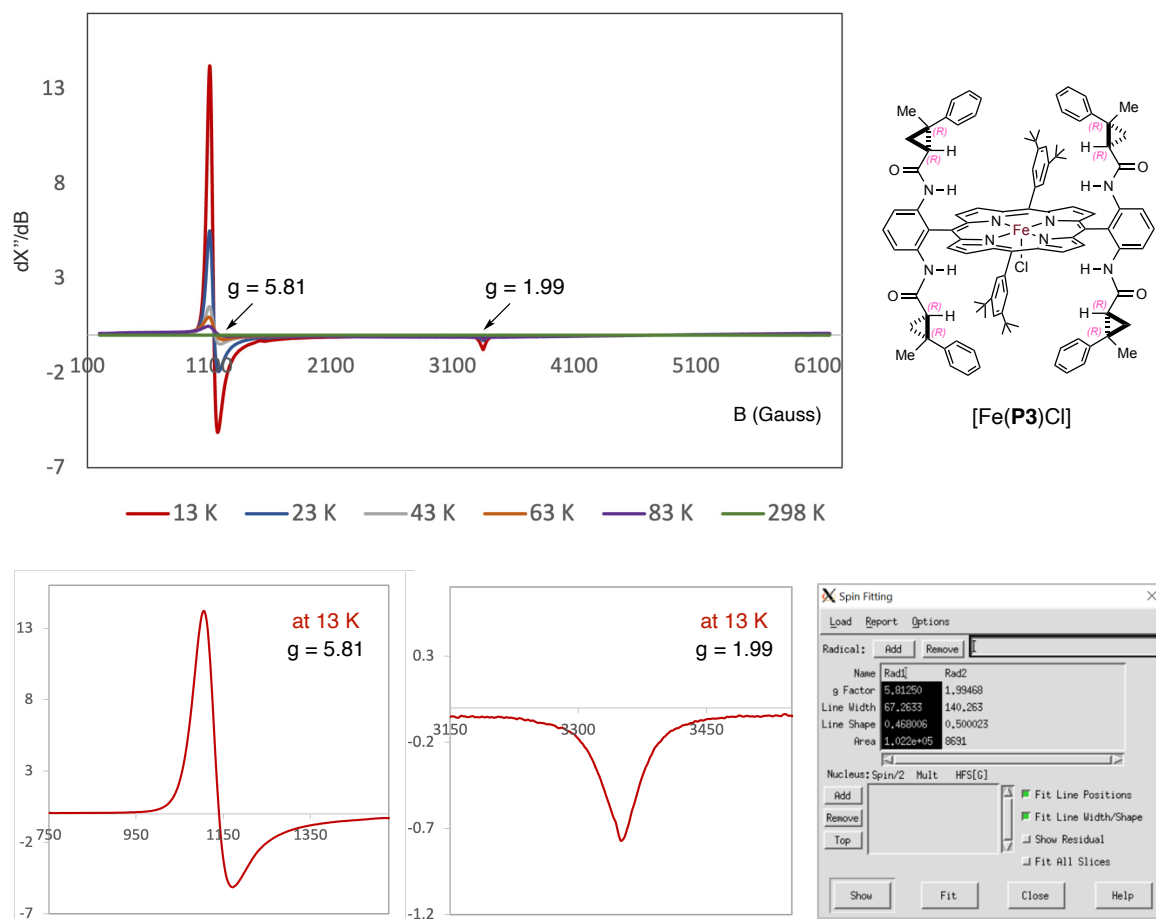

## 6.6. Radical Trapping by EPR

(EPR = Electron Paramagnetic Resonance Spectroscopy)

**Supplemental Experimental Procedure for EPR Experiment:** To an oven-dried Schlenk tube, sulfonylhydrazone (or diazo) (0.1 mmol), [Fe(TPP)Cl] (2 mol %) and 1.2 equivalents of PBN (or DMPO) (0.12 mmol) were added. The Schlenk tube was then evacuated and backfilled with nitrogen three times. The Teflon screw cap was replaced with a rubber septum, and 2.0 equivalents of Et<sub>3</sub>N (0.2 mmol) (*skip adding a base if conducting the reaction using diazo as substrate*) and benzene (1.0 mL) were added via a syringe. The mixture was then stirred at 60 °C for 20 min. The reaction mixture was transferred into a degassed EPR tube (filled with argon) through a syringe. The sample was then carried out for EPR experiment at room temperature.

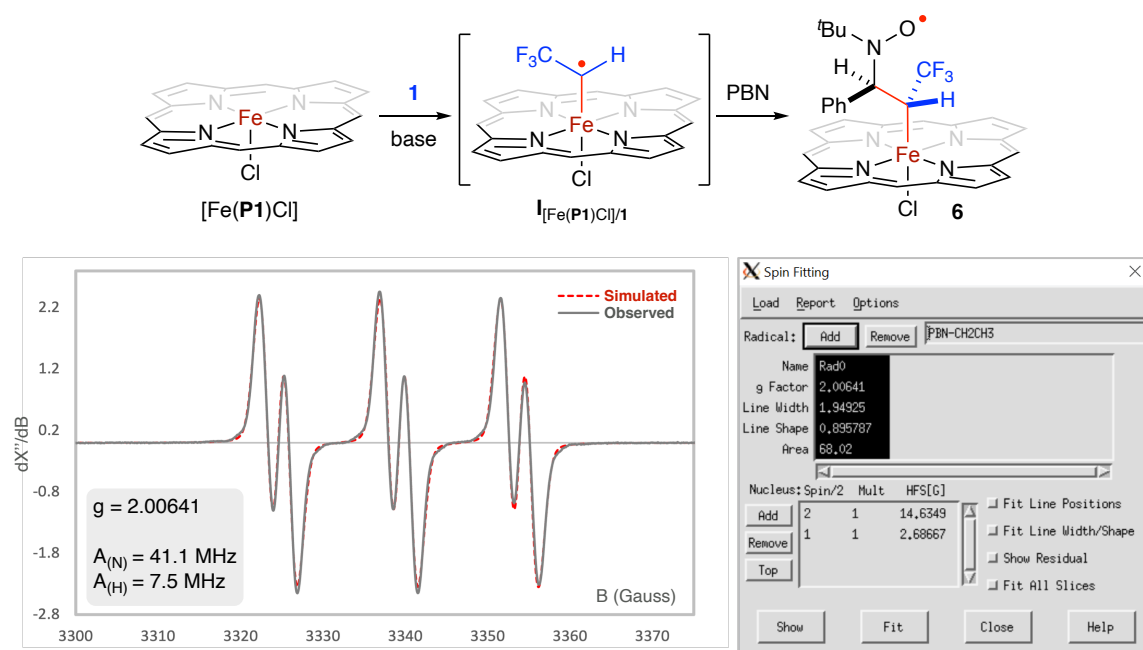

**Figure S13:** EPR Spectrum and Simulation of  $\alpha$ -Fe(IV)-Alkyl Radical with PBN

The resulting notable EPR signal (in grey) has been simulated (in red) with  $g = 2.00641$ ,  $A_{(N)} = 41.1$  MHz,  $A_{(H)} = 7.5$  MHz, which is assigned to PBN (*N-tert-butyl- $\alpha$ -phenylnitron*) adduct of  $\alpha$ -Fe(IV)-alkyl radical intermediate.

### EPR Simulation Details:

$$g = 2.00641$$

$$A_{(N)} = 14.6349 \times 2.00641 \times 1.399611451 = 41.1 \text{ MHz}$$

$$A_{(H)} = 2.68667 \times 2.00641 \times 1.399611451 = 7.5 \text{ MHz}$$

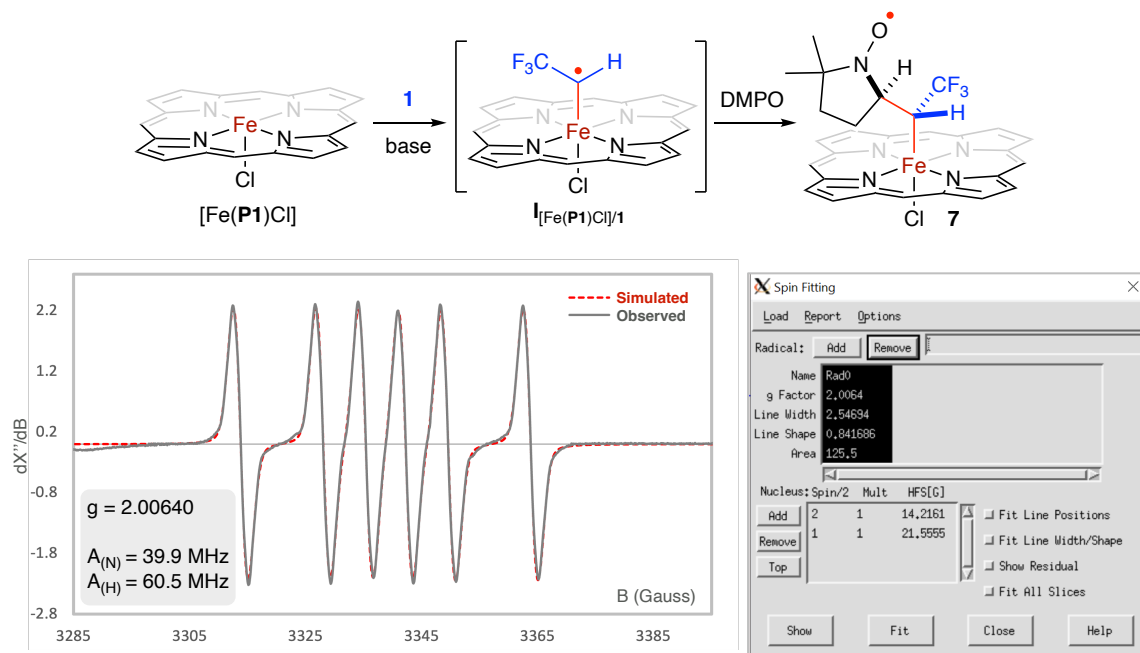

**Figure S14:** EPR Spectrum and Simulation of  $\alpha\text{-Fe(IV)-Alkyl Radical}$  with DMPO

The resulting notable EPR signal (in grey) has been simulated (in red) with  $g = 2.00640$ ,  $A_{(\text{N})} = 39.9 \text{ MHz}$ ,  $A_{(\text{H})} = 60.5 \text{ MHz}$ , which is assigned to DMPO (5,5-Dimethyl-1-pyrroline *N*-oxide) adduct of  $\alpha\text{-Fe(IV)-alkyl radical}$  intermediate.

#### EPR Simulation Details:

$$g = 2.00640$$

$$A_{(\text{N})} = 14.2161 \times 2.00640 \times 1.399611451 = 39.9 \text{ MHz}$$

$$A_{(\text{H})} = 21.5555 \times 2.00640 \times 1.399611451 = 60.5 \text{ MHz}$$

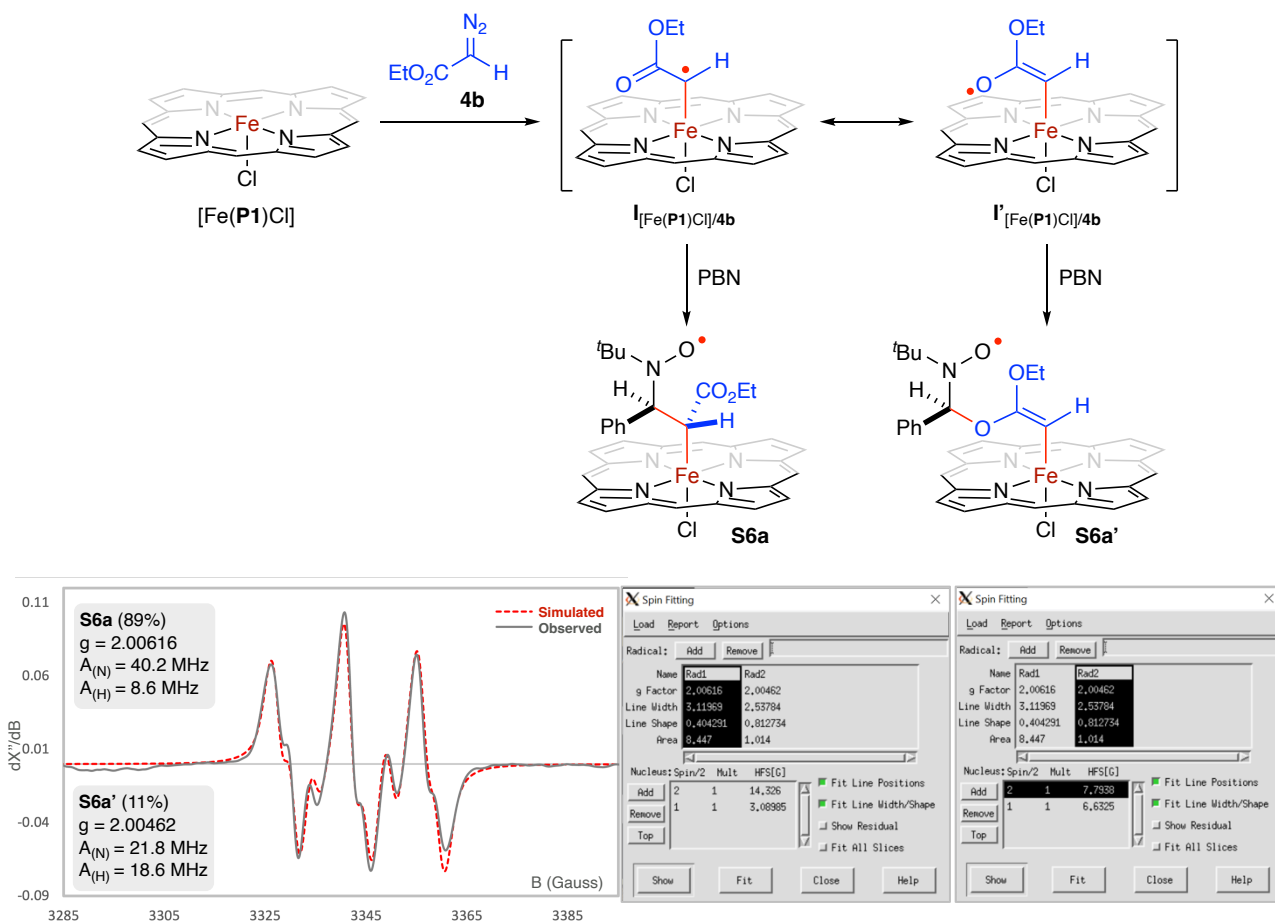

**Figure S15:** EPR Spectrum and Simulation of  $\alpha$ -Fe(IV)-Alkyl Radical with PBN

### EPR Simulation Details:

**S6a (89%)**

**g = 2.00616**

**A<sub>(N)</sub> = 14.3260 x 2.00616 x 1.399611451 = 40.2 MHz**

**A<sub>(H)</sub> = 3.08985 x 2.00616 x 1.399611451 = 8.6 MHz**

**S6a' (11%)**

**g = 2.00462**

**A<sub>(N)</sub> = 7.7938 x 2.00462 x 1.399611451 = 21.8 MHz**

**A<sub>(H)</sub> = 6.6325 x 2.00462 x 1.399611451 = 18.6 MHz**

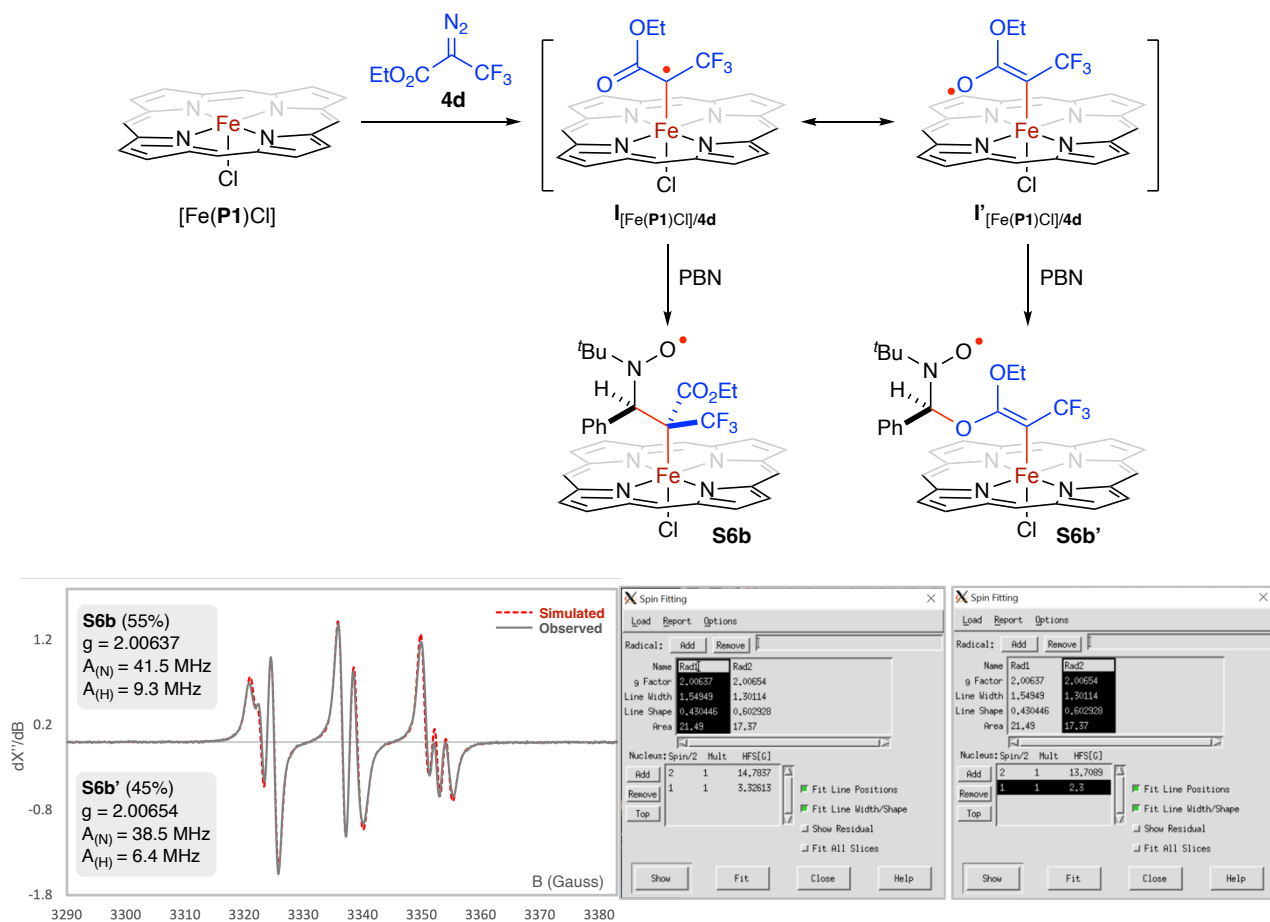

**Figure S16:** EPR Spectrum and Simulation of  $\alpha$ -Fe(IV)-Alkyl Radical with PBN

### EPR Simulation Details:

**S6b (55%)**

$g = 2.00637$

$A_{(N)} = 14.7837 \times 2.00637 \times 1.399611451 = 41.5 \text{ MHz}$

$A_{(H)} = 3.32613 \times 2.00637 \times 1.399611451 = 9.3 \text{ MHz}$

**S6b' (45%)**

$g = 2.00654$

$A_{(N)} = 13.7089 \times 2.00654 \times 1.399611451 = 38.5 \text{ MHz}$

$A_{(H)} = 2.30000 \times 2.00654 \times 1.399611451 = 6.4 \text{ MHz}$

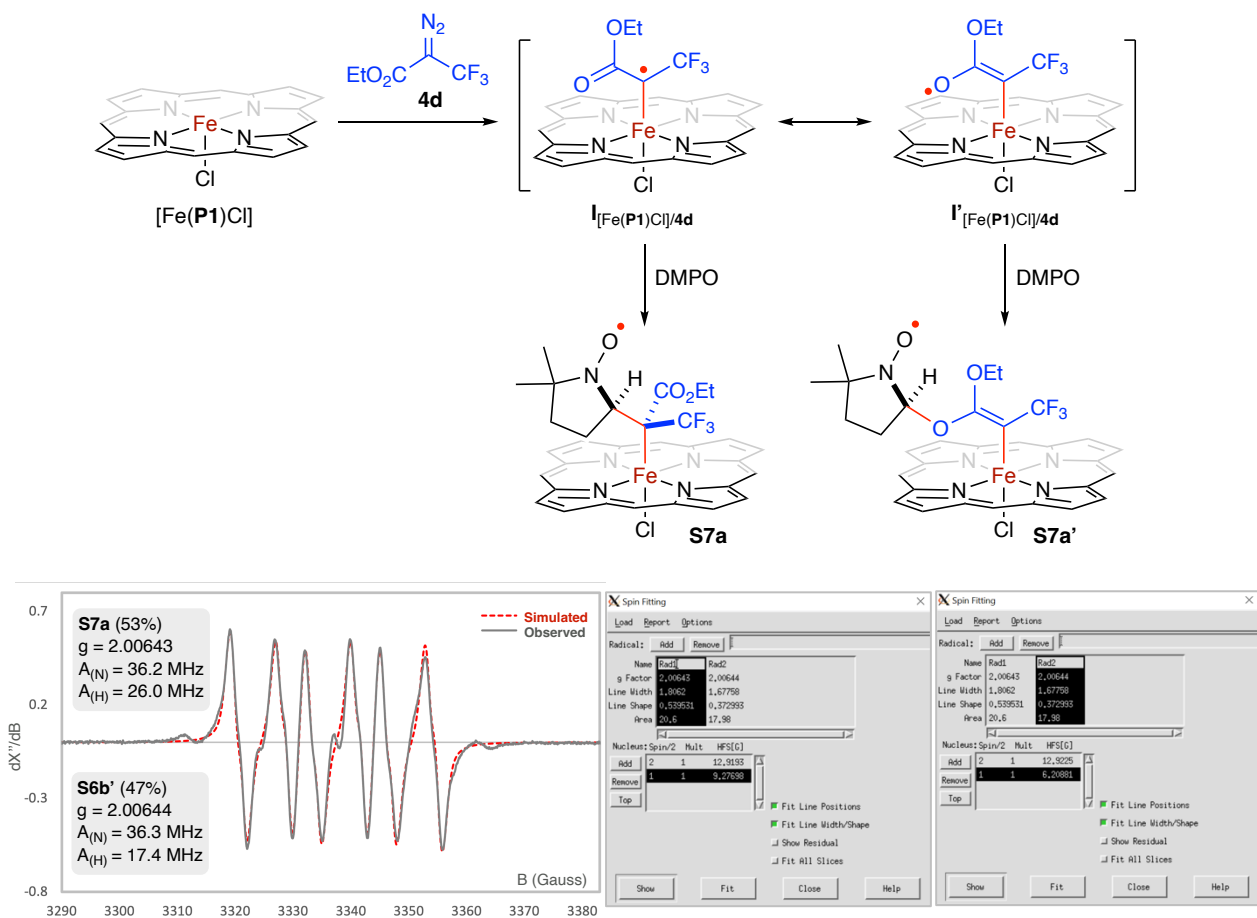

**Figure S17:** EPR Spectrum and Simulation of  $\alpha$ -Fe(IV)-Alkyl Radical with DMPO

### EPR Simulation Details:

#### S7a (53%)

$$g = 2.00643$$

$$A_{(N)} = 12.9193 \times 2.00643 \times 1.399611451 = 36.2 \text{ MHz}$$

$$A_{(H)} = 9.27698 \times 2.00643 \times 1.399611451 = 26.0 \text{ MHz}$$

#### S7a' (47%)

$$g = 2.00644$$

$$A_{(N)} = 12.9225 \times 2.00644 \times 1.399611451 = 36.3 \text{ MHz}$$

$$A_{(H)} = 6.20881 \times 2.00644 \times 1.399611451 = 17.4 \text{ MHz}$$

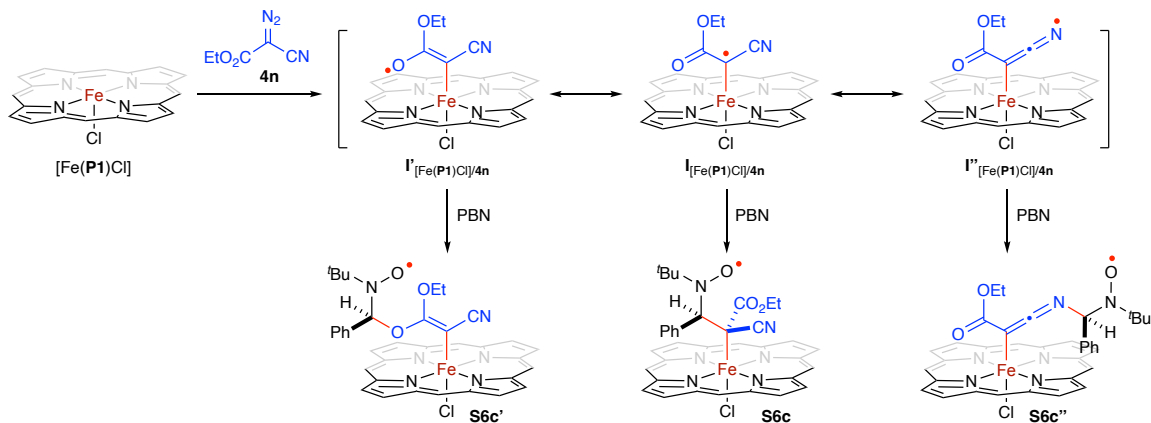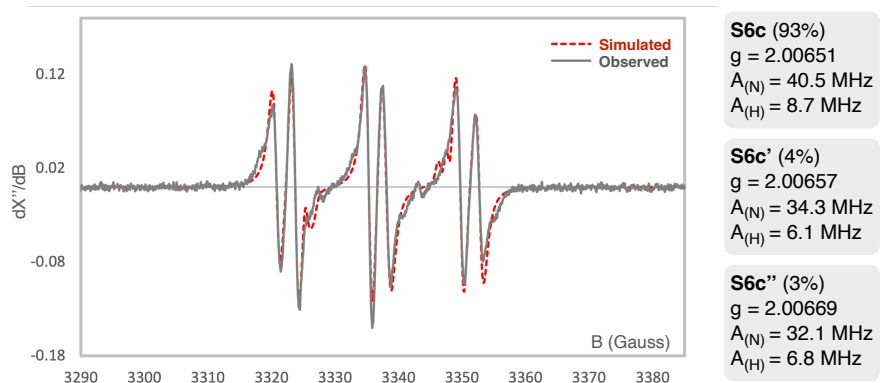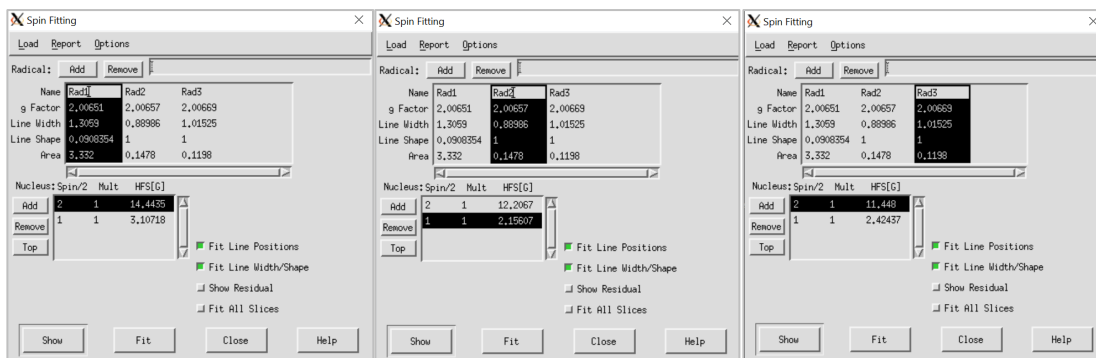

**Figure S18: EPR Spectrum and Simulation of  $\alpha$ -Fe(IV)-Alkyl Radical with PBN**

### EPR Simulation Details:

**S6c (93%)**

$g = 2.00651$

$A_{(N)} = 14.4435 \times 2.00651 \times 1.399611451 = 40.5 \text{ MHz}$

$A_{(H)} = 3.10718 \times 2.00651 \times 1.399611451 = 8.7 \text{ MHz}$



**S6c'** (4%)

$$g = 2.00657$$

$$A_{(N)} = 12.2067 \times 2.00657 \times 1.399611451 = 34.3 \text{ MHz}$$

$$A_{(H)} = 2.15607 \times 2.00657 \times 1.399611451 = 6.1 \text{ MHz}$$

**S6c''** (3%)

$$g = 2.00669$$

$$A_{(N)} = 11.4480 \times 2.00669 \times 1.399611451 = 32.1 \text{ MHz}$$

$$A_{(H)} = 2.42437 \times 2.00669 \times 1.399611451 = 6.8 \text{ MHz}$$

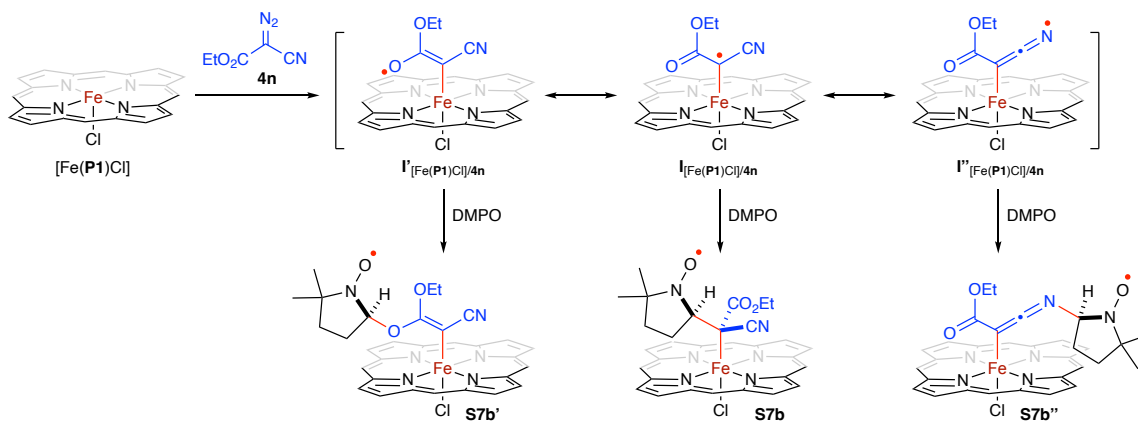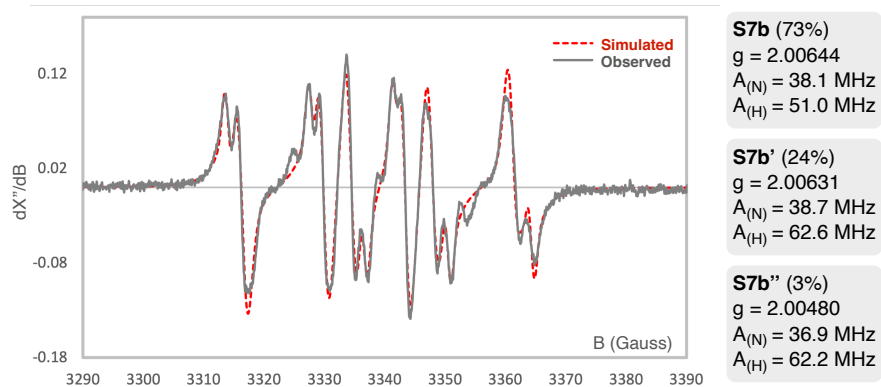

**S7b (73%)**  
 $g = 2.00644$   
 $A_{(\text{N})} = 38.1 \text{ MHz}$   
 $A_{(\text{H})} = 51.0 \text{ MHz}$

**S7b' (24%)**  
 $g = 2.00631$   
 $A_{(\text{N})} = 38.7 \text{ MHz}$   
 $A_{(\text{H})} = 62.6 \text{ MHz}$

**S7b'' (3%)**  
 $g = 2.00480$   
 $A_{(\text{N})} = 36.9 \text{ MHz}$   
 $A_{(\text{H})} = 62.2 \text{ MHz}$

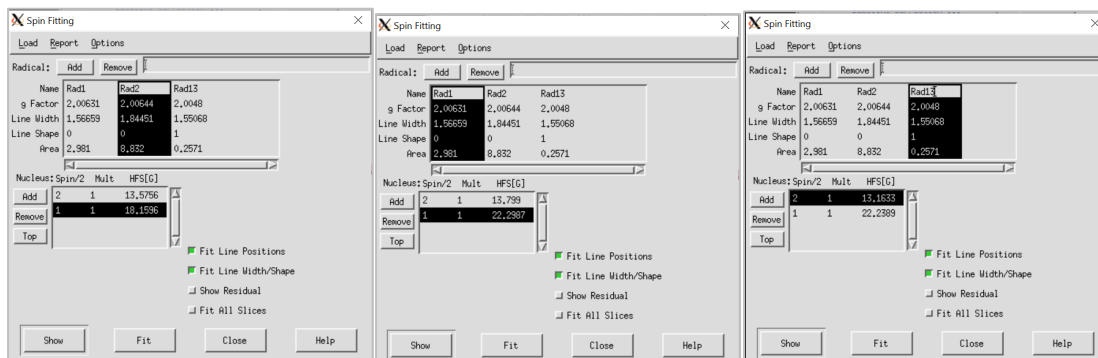

**Figure S19: EPR Spectrum and Simulation of  $\alpha$ -Fe(IV)-Alkyl Radical with DMPO**

### EPR Simulation Details:

**S7b (73%)**

$g = 2.00644$

$A_{(\text{N})} = 13.5756 \times 2.00644 \times 1.399611451 = 38.1 \text{ MHz}$

$A_{(\text{H})} = 18.1596 \times 2.00644 \times 1.399611451 = 51.0 \text{ MHz}$

**S7b'** (24%)

$$g = 2.00631$$

$$A_{(N)} = 13.7990 \times 2.00631 \times 1.399611451 = 38.7 \text{ MHz}$$

$$A_{(H)} = 22.2987 \times 2.00631 \times 1.399611451 = 62.6 \text{ MHz}$$

**S7b''** (3%)

$$g = 2.00480$$

$$A_{(N)} = 13.1633 \times 2.00480 \times 1.399611451 = 36.9 \text{ MHz}$$

$$A_{(H)} = 22.2389 \times 2.00480 \times 1.399611451 = 62.2 \text{ MHz}$$

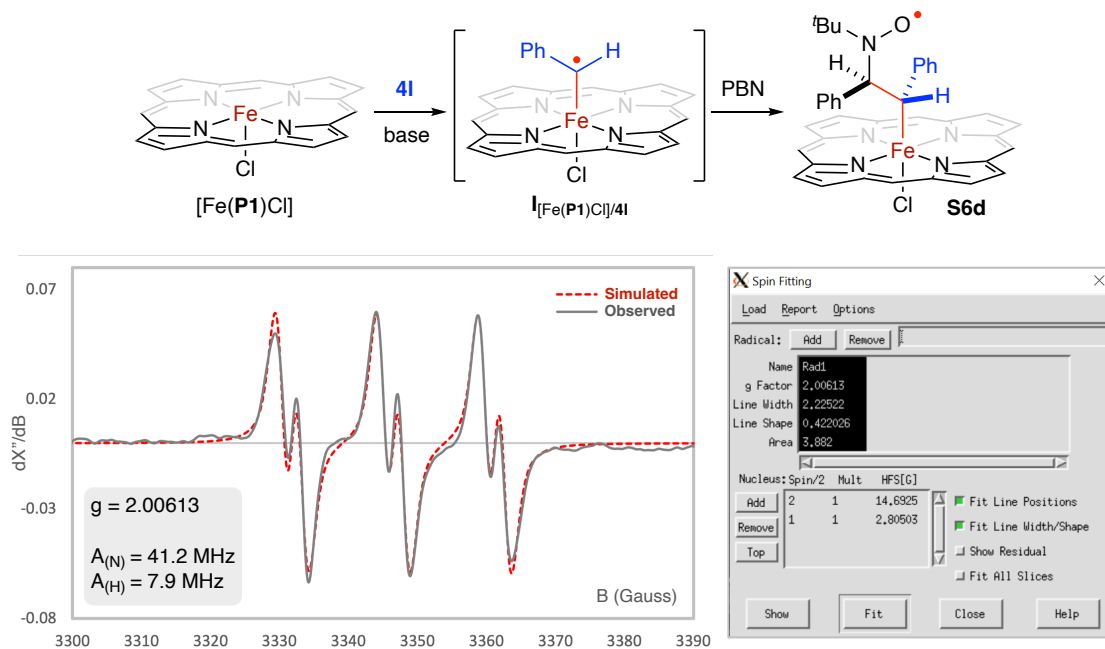

**Figure S20:** EPR Spectrum and Simulation of  $\alpha$ -Fe(IV)-Benzyl Radical with PBN

The resulting notable EPR signal (in grey) has been simulated (in red) with  $g = 2.00613$ ,  $A_{(\text{N})} = 41.2 \text{ MHz}$ ,  $A_{(\text{H})} = 7.9 \text{ MHz}$ , which is assigned to PBN (*N-tert*-butyl- $\alpha$ -phenylnitron) adduct of  $\alpha$ -Fe(IV)-benzyl radical intermediate.

#### EPR Simulation Details:

$$g = 2.00613$$

$$A_{(\text{N})} = 14.6925 \times 2.00613 \times 1.399611451 = 41.2 \text{ MHz}$$

$$A_{(\text{H})} = 2.80503 \times 2.00613 \times 1.399611451 = 7.9 \text{ MHz}$$

## 6.7. Radical Trapping by H-Atom Sources

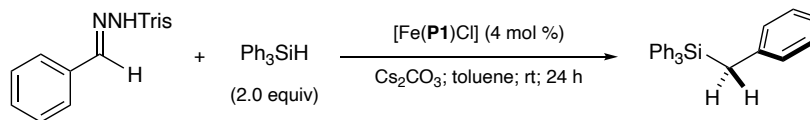

An oven-dried Schlenk tube was charged with 1.0 equivalent of hydrazone (0.1 mmol), 2.0 equivalents of silane/stannane (0.2 mmol), [Fe(P1)Cl] (4 mol %) and 2.0 equivalents of Cs<sub>2</sub>CO<sub>3</sub> (0.2 mmol). The Schlenk tube was then evacuated and back filled with nitrogen three times. The Teflon screw cap was replaced with a rubber septum, and toluene (1 mL) was added. The Schlenk tube was then purged with nitrogen for 30 sec and the rubber septum was replaced with a Teflon screw cap. The mixture was stirred at rt. After 24 h, the reaction mixture was filtered through a plug of silica and concentrated *in vacuo*, then purified via a flash chromatography to afford the desired compound.

### Benzyltriphenylsilane (8)

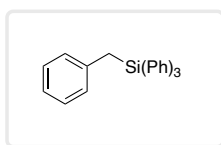

Yield: 31%. White solid. <sup>1</sup>H NMR (400 MHz, Chloroform-*d*) δ 7.44 – 7.38 (m, 9H), 7.33 (t, *J* = 7.6 Hz, 6H), 7.06 (q, *J* = 6.9 Hz, 3H), 6.85 (d, *J* = 6.6 Hz, 2H), 2.93 (s, 2H). <sup>13</sup>C NMR (101 MHz, Chloroform-*d*) δ 138.4, 136.1, 134.4, 129.7, 129.3, 128.1, 127.9, 124.6, 23.6. IR (neat, cm<sup>-1</sup>): 3068, 3024, 1598, 1494, 1427, 1208, 1109, 768. HRMS-(DART+) calculated for C<sub>25</sub>H<sub>26</sub>SiN [M+NH<sub>4</sub>]<sup>+</sup>: 368.1829, found: 368.1842.

### Benzyltriphenylstannane (8')

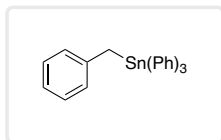

Yield: 85%. White solid. <sup>1</sup>H NMR (500 MHz, Chloroform-*d*) δ 7.48 – 7.40 (m, 6H), 7.38 – 7.34 (m, 9H), 7.14 (t, *J* = 7.5 Hz, 2H), 7.08 – 7.01 (m, 3H), 2.99 (t, *J*<sub>Sn-H</sub> = 32.5 Hz, 2H). <sup>13</sup>C NMR (101 MHz, Chloroform-*d*) δ 140.8, 138.4, 137.2, 129.1, 128.6, 128.5, 128.0, 124.1, 20.2. IR (neat, cm<sup>-1</sup>): 3062, 3018, 1598, 1491, 1428, 1207, 1074, 997. The structure was characterized by X-ray crystallography.

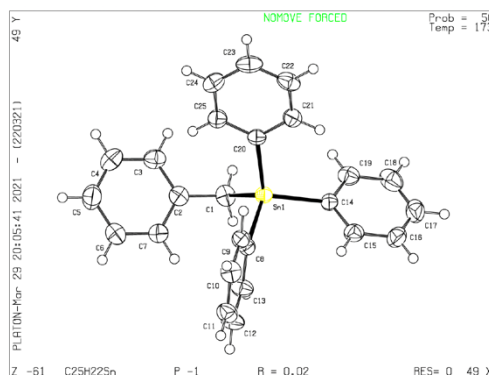

## 6.8. Radical Trapping by TEMPO

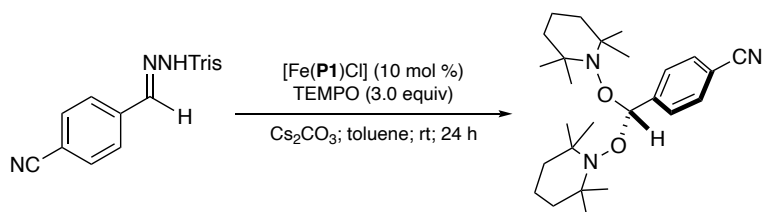

An oven-dried Schlenk tube was charged with 1.0 equivalent of hydrazone (0.1 mmol), 3.0 equivalents of TEMPO (0.3 mmol), [Fe(P1)Cl] (10 mol %) and 2.0 equivalents of Cs<sub>2</sub>CO<sub>3</sub> (0.2 mmol). The Schlenk tube was then evacuated and back filled with nitrogen three times. The Teflon screw cap was replaced with a rubber septum, and toluene (1 mL) was added. The Schlenk tube was then purged with nitrogen for 30 sec and the rubber septum was replaced with a Teflon screw cap. The mixture was stirred at rt. After 24 h, the reaction mixture was filtered through a plug of silica and concentrated *in vacuo*, then purified via a flash chromatography to afford the desired compound.

### 4-(Bis((2,2,6,6-tetramethylpiperidin-1-yl)oxy)methyl)benzotrile (9)

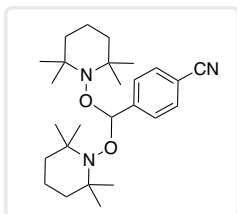

Yield: 70%. White solid. <sup>1</sup>H NMR (400 MHz, Chloroform-*d*) δ 7.58 (d, *J* = 1.7 Hz, 4H), 6.06 (s, 1H), 1.49 (s, 12H), 1.31 (s, 8H), 1.23 (s, 6H), 0.97 (s, 6H), 0.45 (s, 4H). <sup>13</sup>C NMR (101 MHz, Chloroform-*d*) δ 145.6, 131.1, 129.6, 119.3, 111.6, 108.2, 40.8, 40.1, 34.5, 33.1, 21.4, 20.9, 17.3. IR (neat, cm<sup>-1</sup>): 2974, 2931, 2228, 1466, 1363, 1132, 947, 834. HRMS-(DART+) calculated for C<sub>26</sub>H<sub>42</sub>N<sub>3</sub>O<sub>2</sub> [M+H]<sup>+</sup>:

428.3272, found: 428.3276. The structure was characterized by X-ray crystallography.

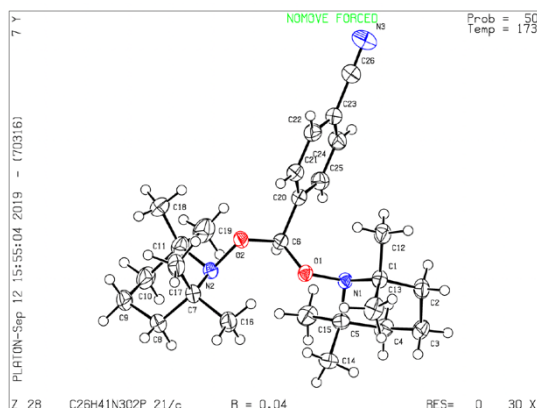

## 6.9. Probing of Radical Intermediates by Reactions of $\beta$ -Deuterostyrenes

An oven-dried Schlenk tube was charged with 1.0 equivalent of olefin (0.1 mmol), 1.2 equivalents of hydrazone (0.12 mmol), [Fe(Por)Cl] (2 mol %) and 2.4 equivalents of Cs<sub>2</sub>CO<sub>3</sub> (0.24 mmol). The Schlenk tube was then evacuated and back filled with nitrogen three times. The Teflon screw cap was replaced with a rubber septum, and solvent (1 mL) was added. The Schlenk tube was then purged with nitrogen for 30 sec and the rubber septum was replaced with a Teflon screw cap. The mixture was stirred at 40 °C. After 20 h, the reaction mixture was filtered through a plug of silica and then concentrated *in vacuo*. The residue was purified via a flash chromatography to afford the compound. (*The modification of reaction conditions is substrate-dependent, the details mentioned in the main text Table 3.*)

**Figure S21.** The Rationale of both Isotopomers (*trans;cis*)-**3c<sub>D</sub>** and (*trans;trans*)-**3c<sub>D</sub>** Formation from [Fe(Por)Cl]-Catalyzed Asymmetric Cyclopropanation of (*Z*)-**2c<sub>D</sub>**

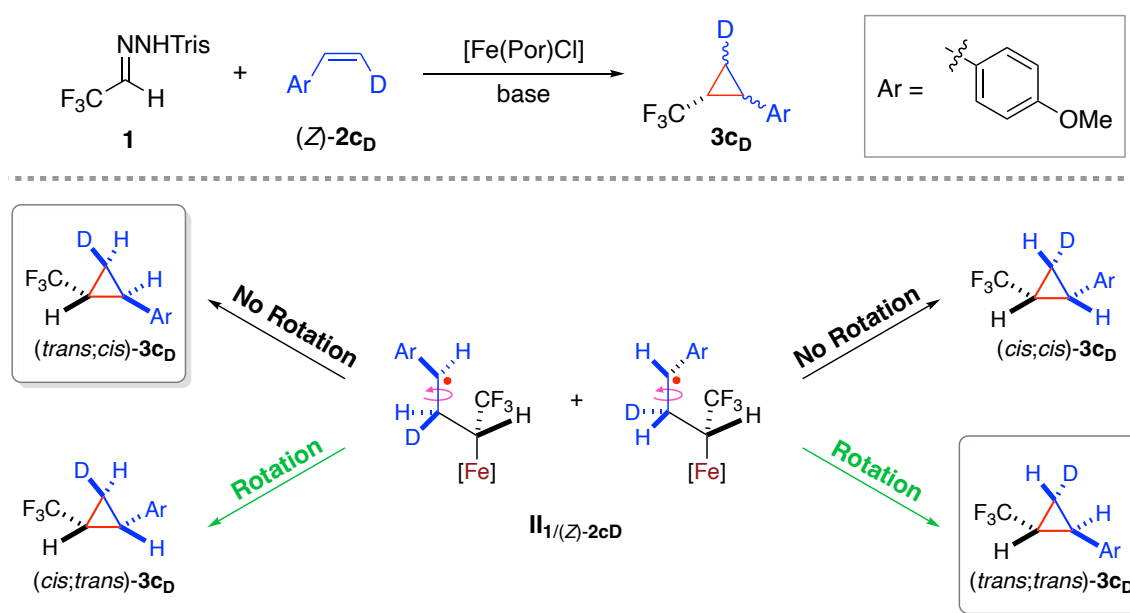

**Figure S22.** The Rationale of both Isotopomers (*trans;cis*)-**3c<sub>D</sub>** and (*trans;trans*)-**3c<sub>D</sub>** Formation from [Fe(Por)Cl]-Catalyzed Asymmetric Cyclopropanation of (*E*)-**2c<sub>D</sub>**

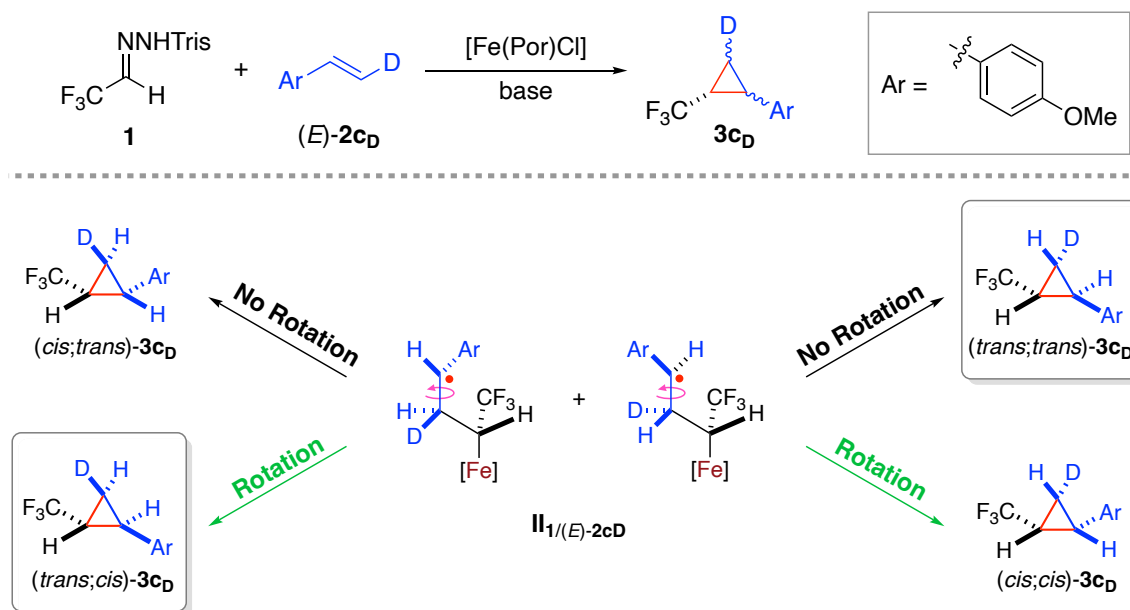



**Figure S23.** Upfield  $^2\text{H}$  NMR and  $^1\text{H}$  NMR for Cyclopropane Isomers  $3\text{c}_\text{D}$  from  $[\text{Fe}(\text{P1})\text{Cl}]$ -Catalyzed Cyclopropanation between: **(a)** hydrazone (**1**) and olefin (*Z*)- $2\text{c}_\text{D}$  **(b)** hydrazone (**1**) and olefin (*E*)- $2\text{c}_\text{D}$

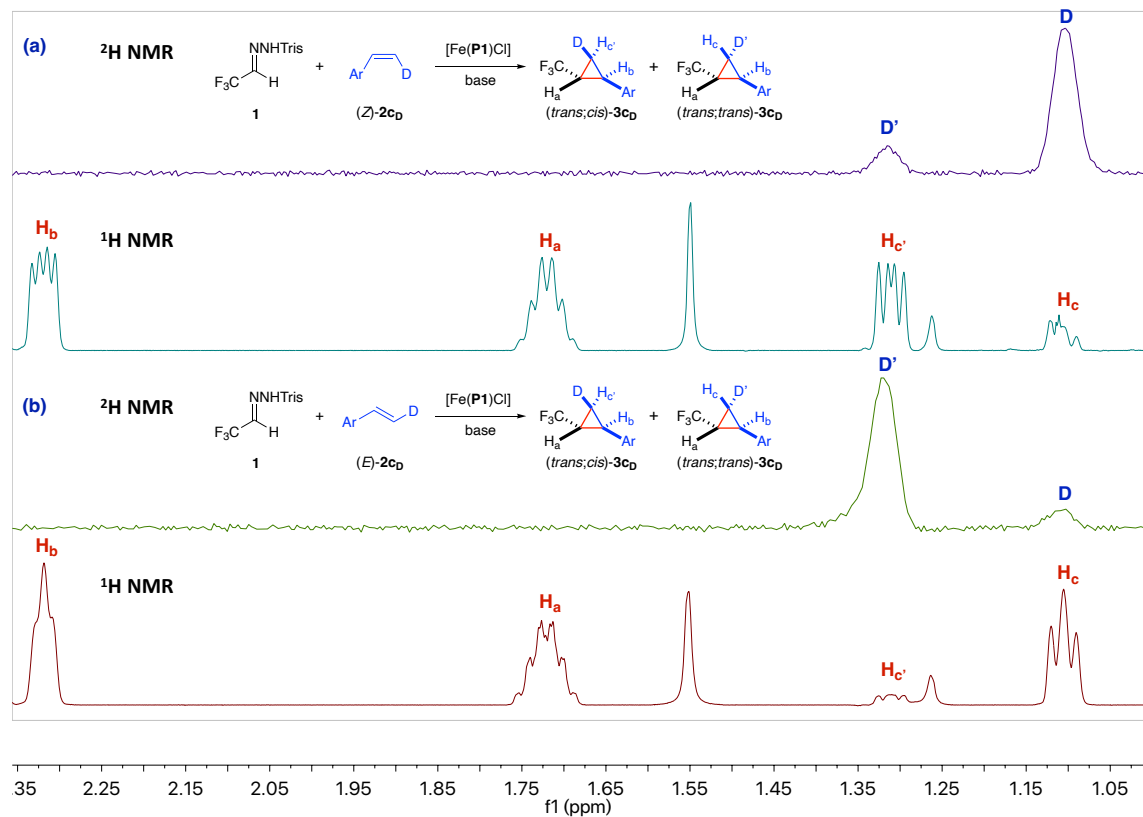

**Figure S24.** Upfield  $^2\text{H}$  NMR and  $^1\text{H}$  NMR for Cyclopropane Isomers  $3\text{c}_\text{D}$  from  $[\text{Fe}(\text{P}2)\text{Cl}]$ -Catalyzed Cyclopropanation between: **(a)** hydrazone (**1**) and olefin (*Z*)- $2\text{c}_\text{D}$  **(b)** hydrazone (**1**) and olefin (*E*)- $2\text{c}_\text{D}$

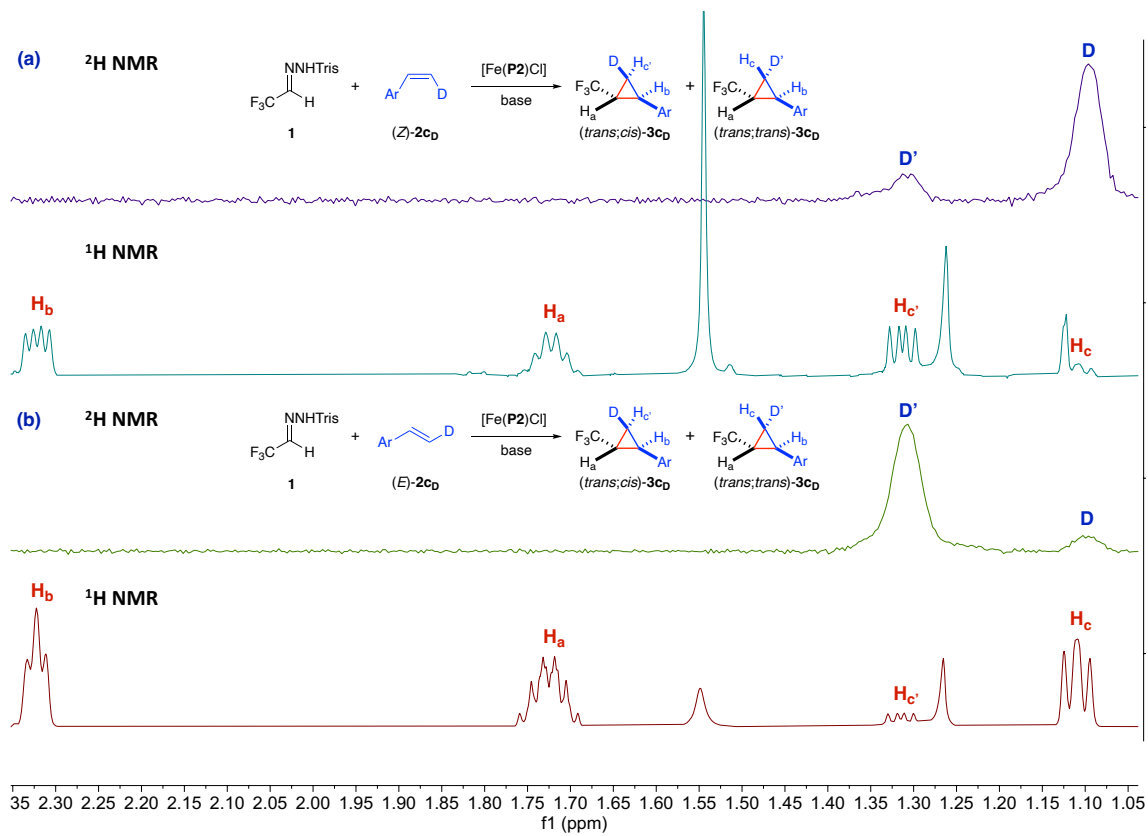

**Figure S25.** Upfield  $^2\text{H}$  NMR and  $^1\text{H}$  NMR for Cyclopropane Isomers  $3\text{c}_\text{D}$  from  $[\text{Fe}(\text{P}3)\text{Cl}]$ -Catalyzed Cyclopropanation between: **(a)** hydrazone (**1**) and olefin (*Z*)- $2\text{c}_\text{D}$  **(b)** hydrazone (**1**) and olefin (*E*)- $2\text{c}_\text{D}$

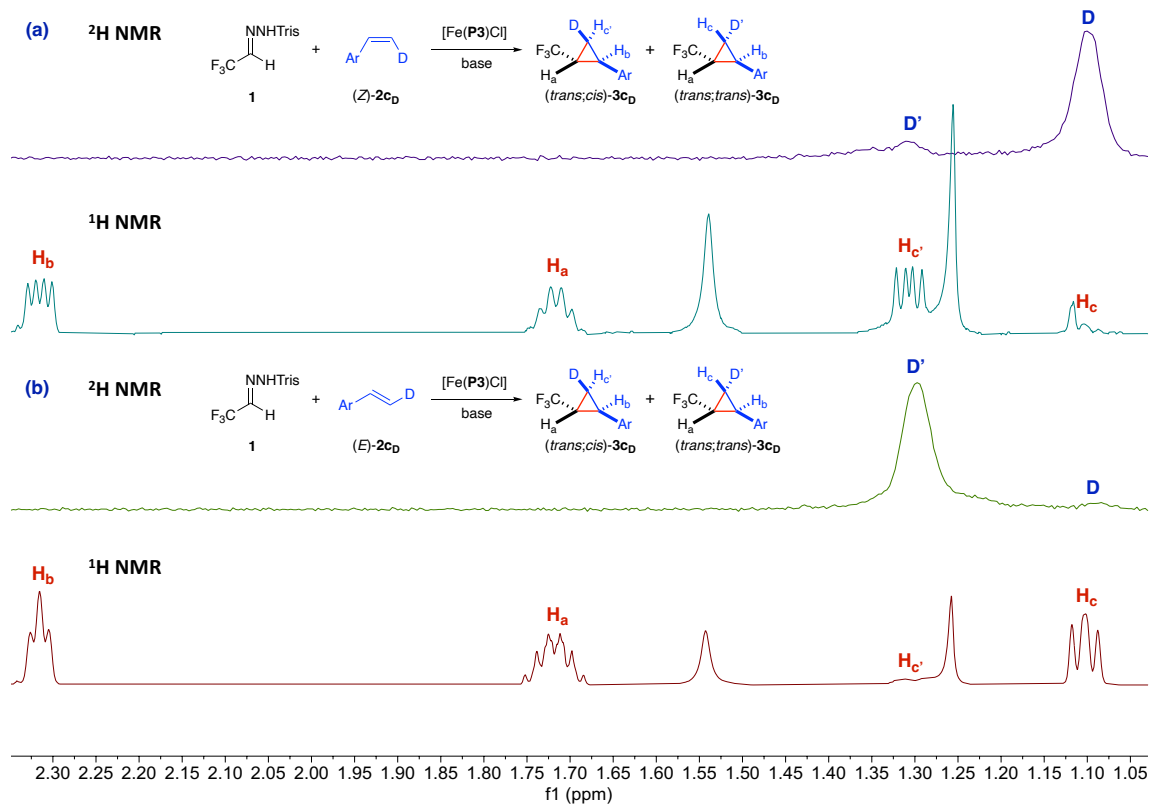

**Figure S26.** Upfield  $^2\text{H}$  NMR and  $^1\text{H}$  NMR for Cyclopropane Isomers **5b<sub>D</sub>** from  $[\text{Fe}(\text{P2})\text{Cl}]$ -Catalyzed Cyclopropanation between: **(a)** Diazo (**4b**) and olefin (*Z*)-**2a<sub>D</sub>** **(b)** Diazo (**4b**) and olefin (*E*)-**2a<sub>D</sub>**

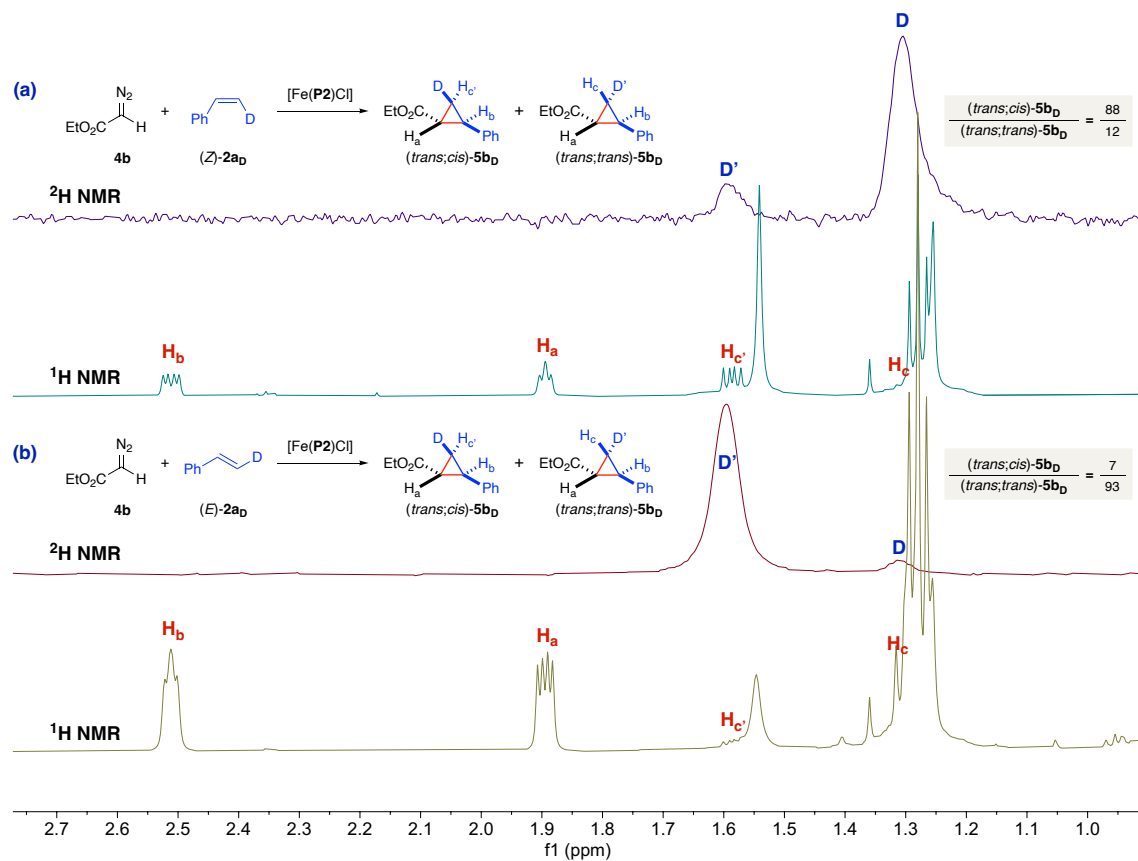

**Figure S27.** Upfield  $^2\text{H}$  NMR and  $^1\text{H}$  NMR for Cyclopropane Isomers  $5\text{e}_\text{D}$  from  $[\text{Fe}(\text{P}2)\text{Cl}]$ -Catalyzed Cyclopropanation between: **(a)** Diazo ( $4\text{e}$ ) and olefin ( $Z$ )- $2\text{a}_\text{D}$  **(b)** Diazo ( $4\text{e}$ ) and olefin ( $E$ )- $2\text{a}_\text{D}$

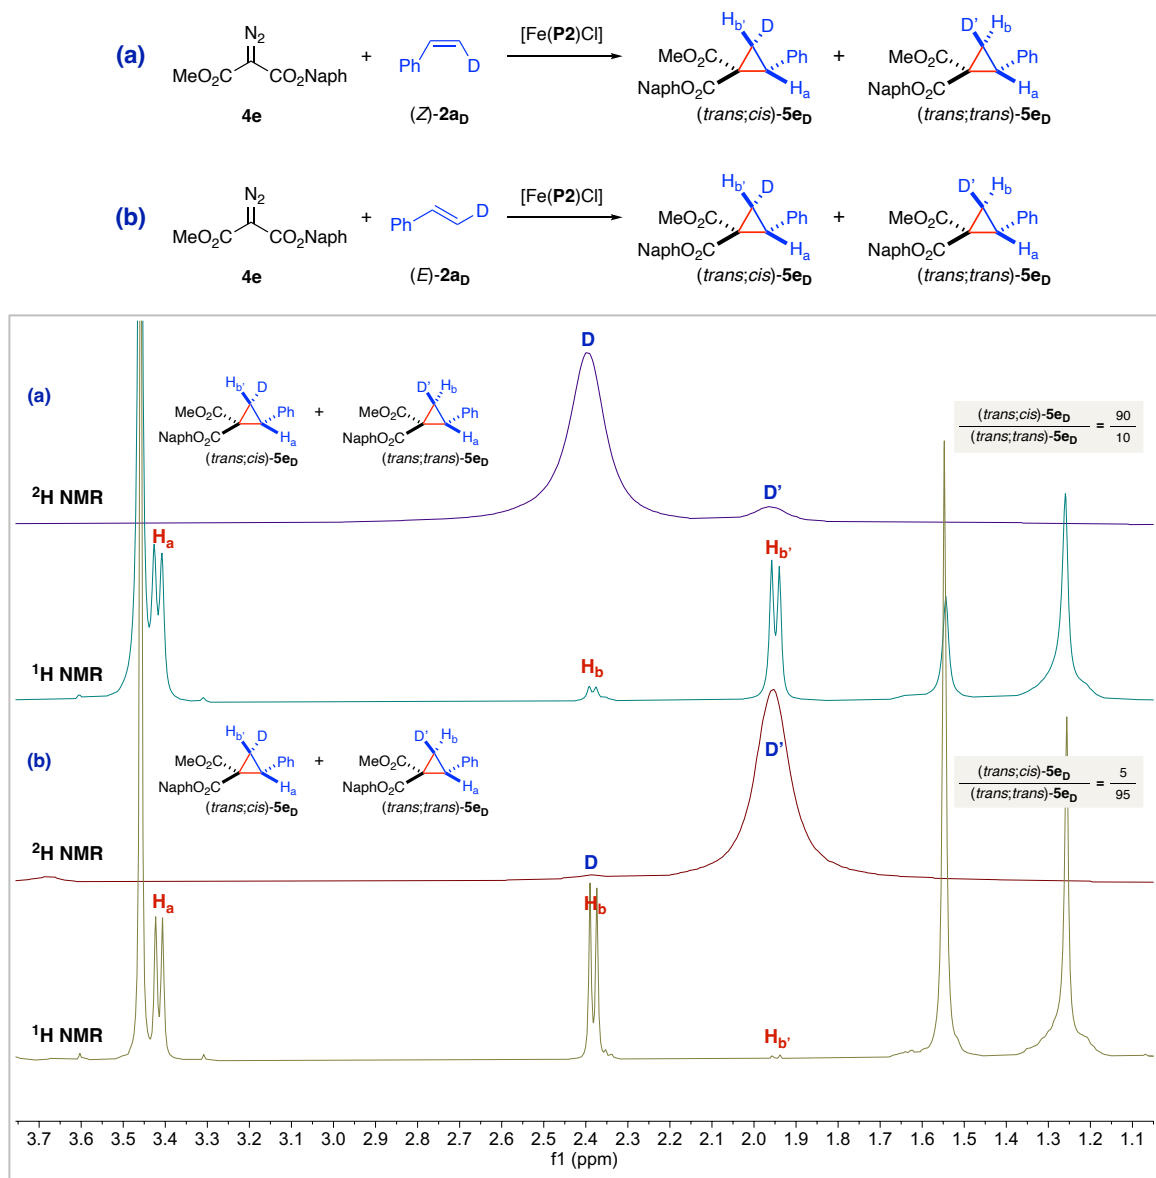

**Figure S28.** Upfield  $^2\text{H}$  NMR and  $^1\text{H}$  NMR for Cyclopropane Isomers  $50_{\text{D}}$  from  $[\text{Fe}(\text{P}2)\text{Cl}]$ -Catalyzed Cyclopropanation between: **(a)** hydrazone ( $40$ ) and olefin ( $Z$ )- $2a_{\text{D}}$  **(b)** hydrazone ( $40$ ) and olefin ( $E$ )- $2a_{\text{D}}$

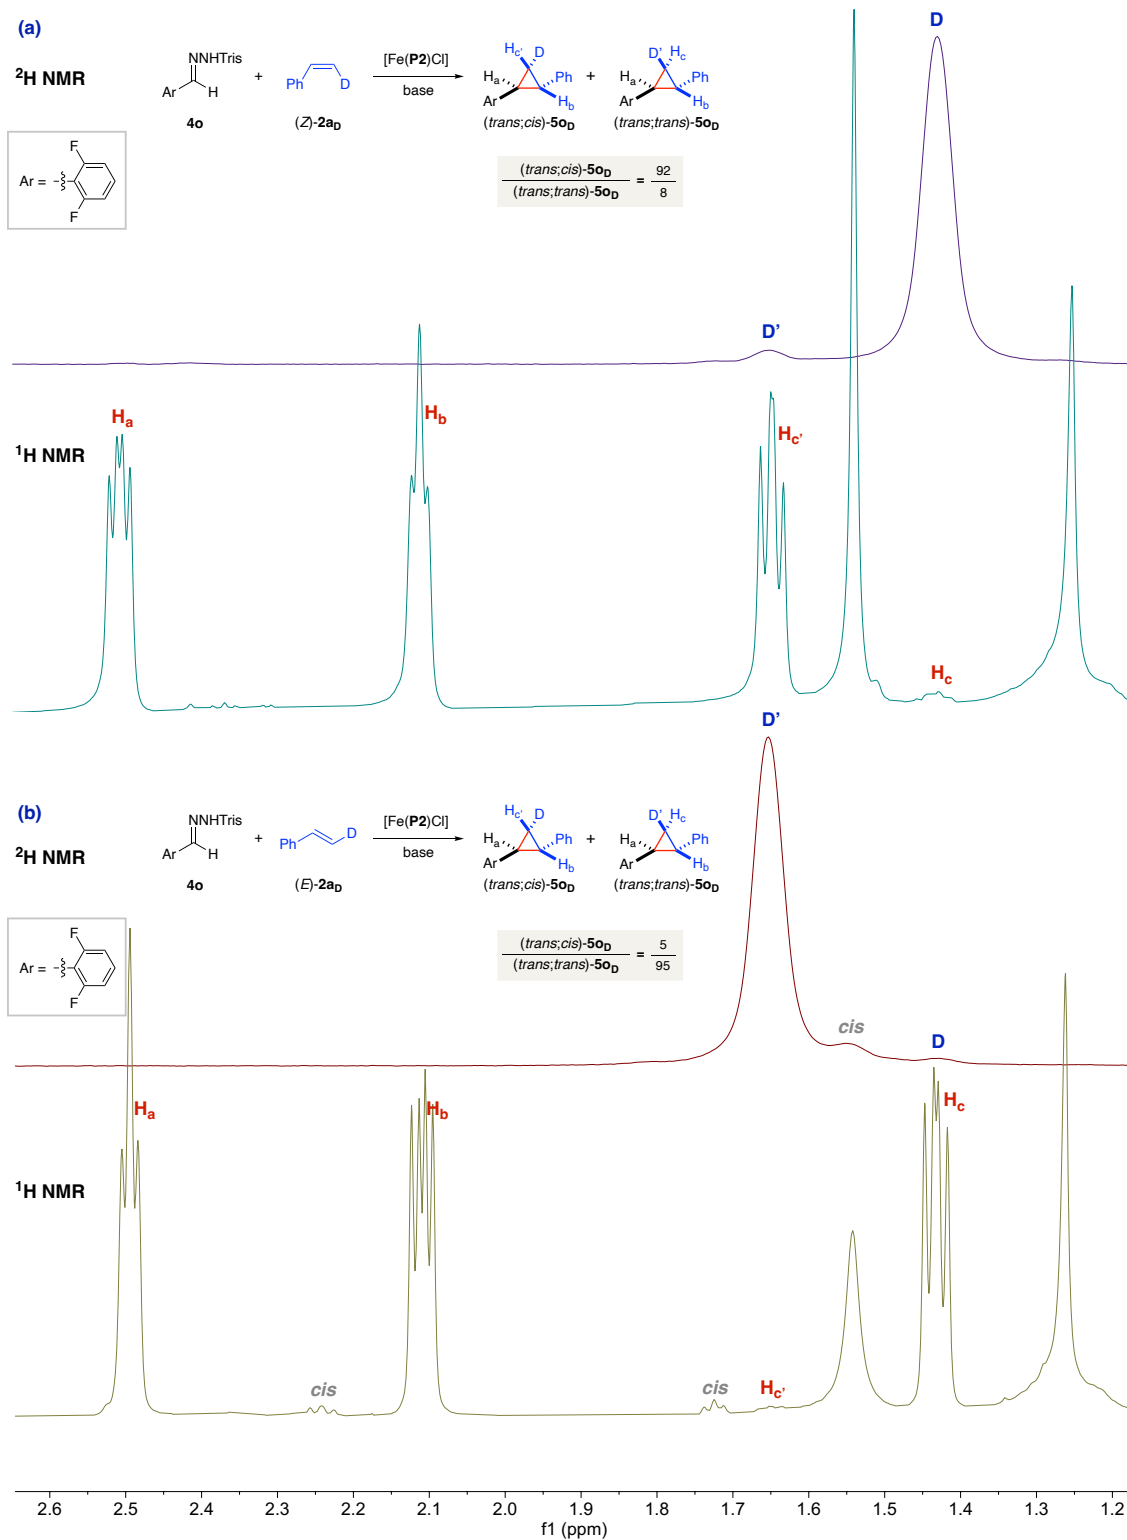

## 6.10. Reaction Progress Monitored by NMR Spectroscopy

An oven-dried Schlenk tube was charged with 1.0 equivalent of olefin **2a** (0.05 mmol), 1.2 equivalents of hydrazone **1** (0.06 mmol) and [Fe(**P3**)Cl] (2 mol %). The Schlenk tube was then evacuated and back filled with nitrogen three times. The Teflon screw cap was replaced with a rubber septum, and toluene-*d*<sub>8</sub> (0.5 mL) was added. The mixture was stirred at rt. After 10 sec, the reaction mixture was added to the J. Young NMR tube containing 2.4 equivalents of Cs<sub>2</sub>CO<sub>3</sub> (0.12 mmol). The NMR spectra were acquired using Varian Inova 400 MHz or Bruke 500 MHz.

**Figure S29.** <sup>1</sup>H NMR Spectrum of the Catalytic Reaction in Toluene-*d*<sub>8</sub> (t = 0 min)

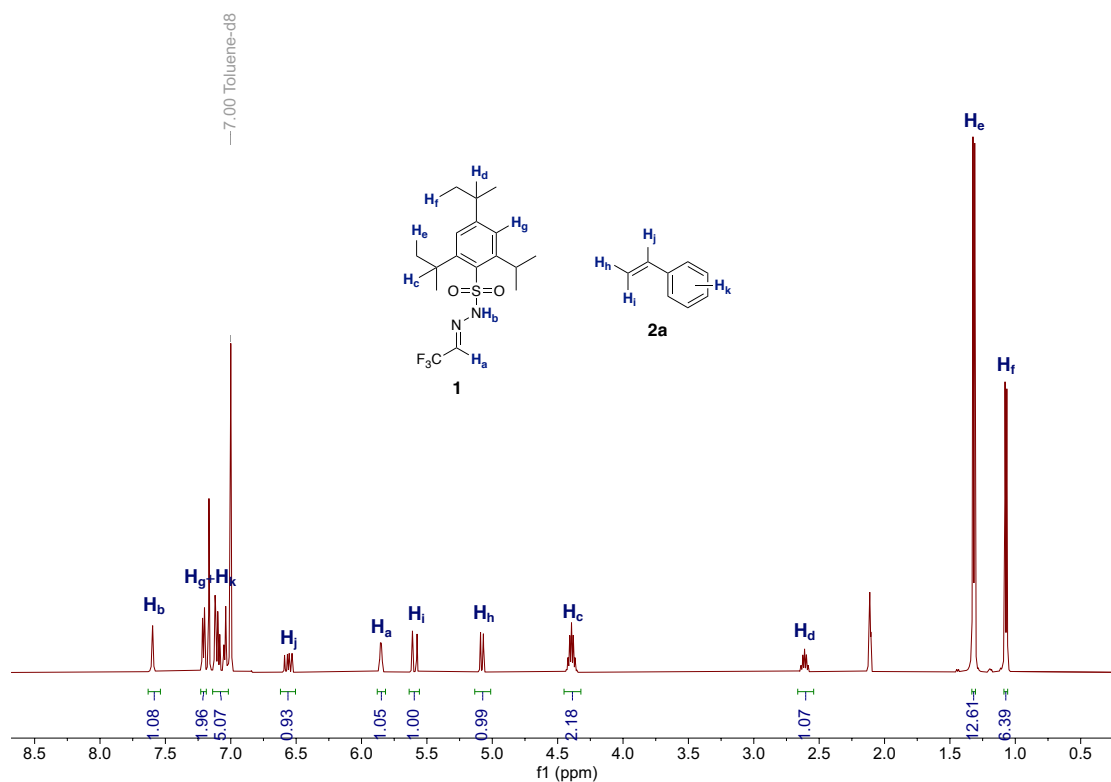

**Figure S30.** Time-Stacked  $^1\text{H}$  NMR Spectra of the Catalytic Reaction in Toluene- $d_8$

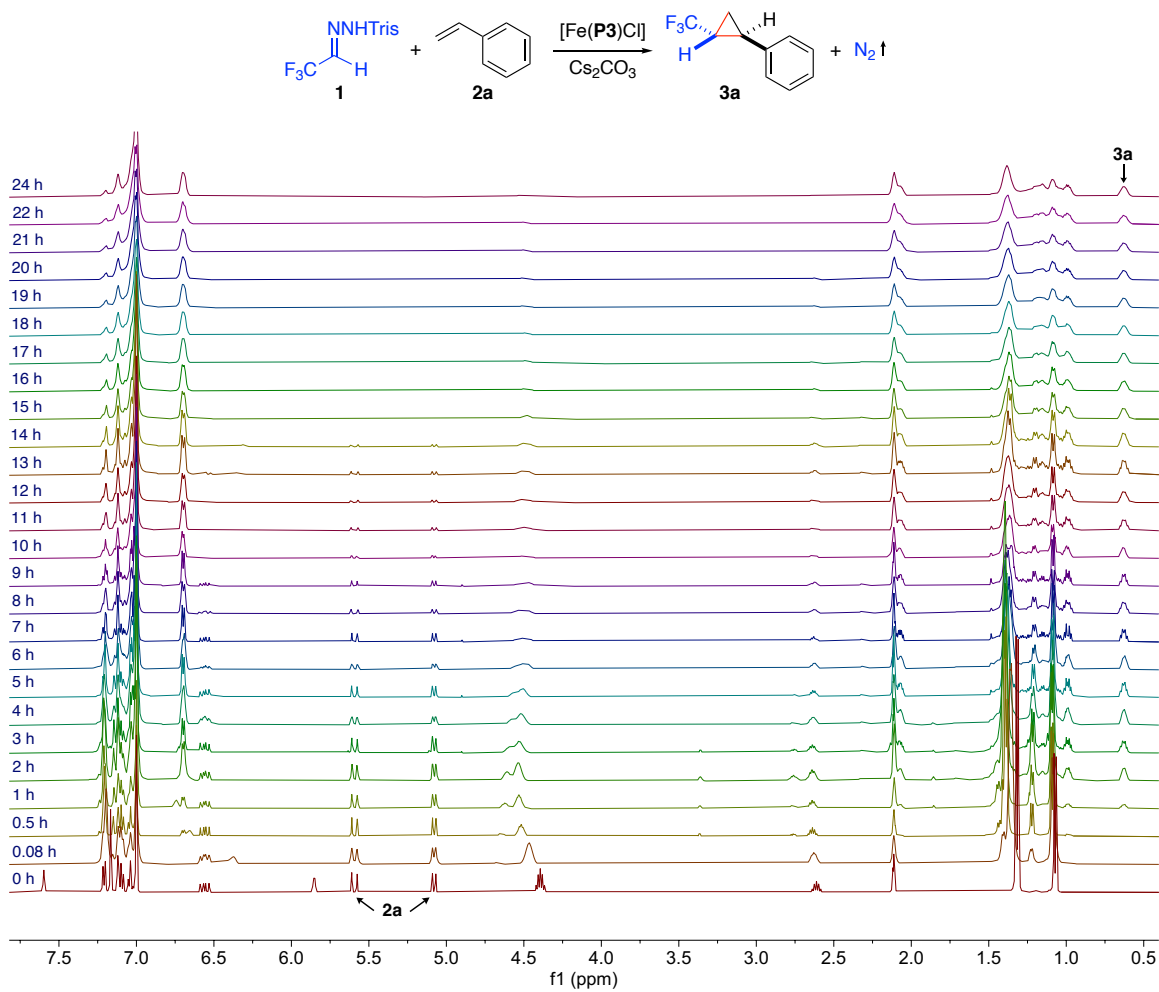



**Figure S31.** Time-Stacked  $^{19}\text{F}$  NMR Spectra of the Catalytic Reaction in Toluene- $d_8$

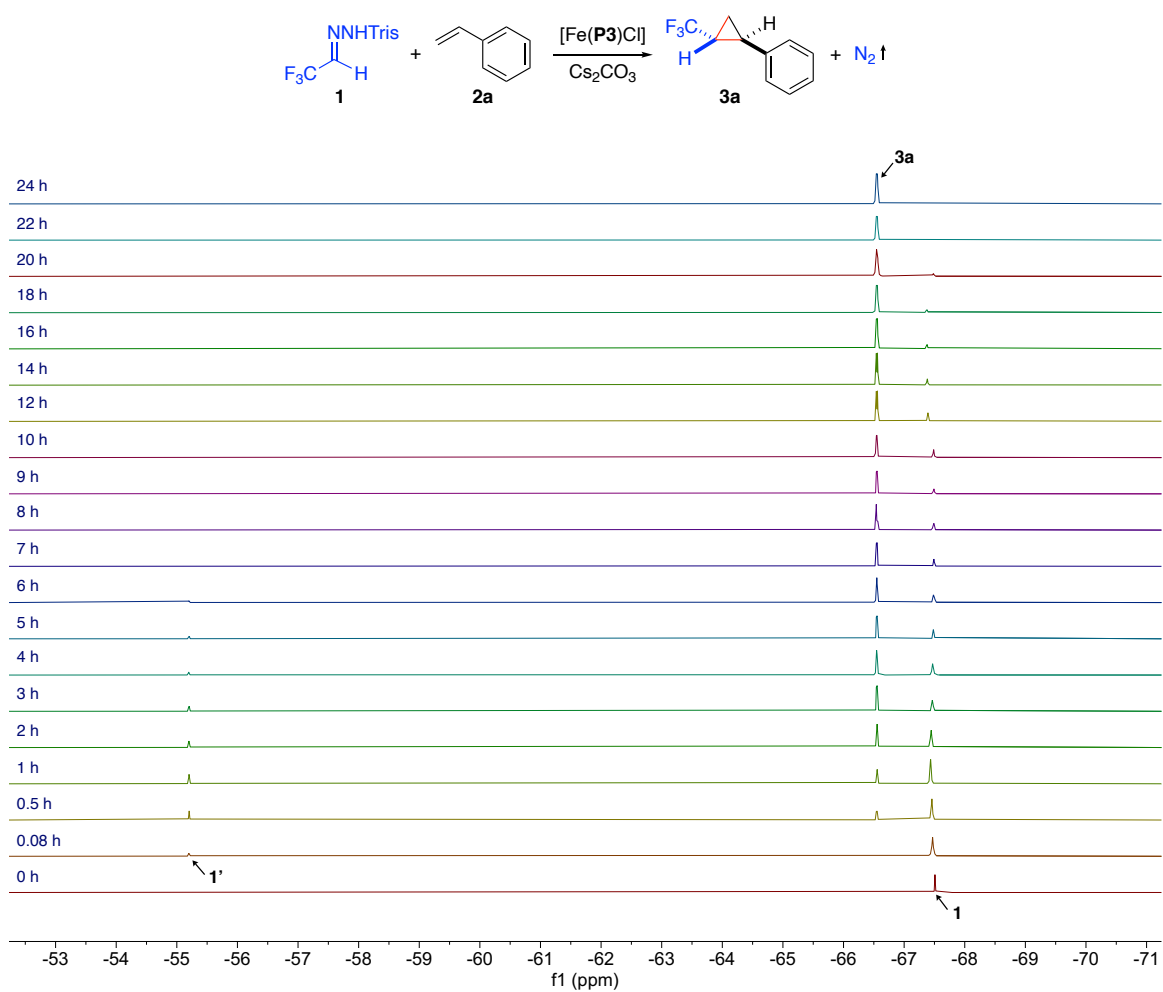

## 6.11. Determination of Kinetic Orders in the Catalytic Reaction

*Standard conditions:* An oven-dried Schlenk tube was charged with olefin **2a** (0.05 mmol), 1.2 equivalents of hydrazone **1** (0.06 mmol) and [Fe(**P3**)Cl] (2 mol %). The Schlenk tube was then evacuated and back filled with nitrogen three times. The Teflon screw cap was replaced with a rubber septum, and toluene-*d*<sub>8</sub> (0.5 mL) was added. The mixture was stirred at rt. After 10 sec, the reaction mixture was added to the J. Young NMR tube containing 2.4 equivalents of Cs<sub>2</sub>CO<sub>3</sub> (0.12 mmol). The NMR spectra were acquired using Varian Inova 400 MHz or Bruke 500 MHz.

**Figure S32.** Representative Plot for the Conversion of **1/2a** to **3a** versus Time

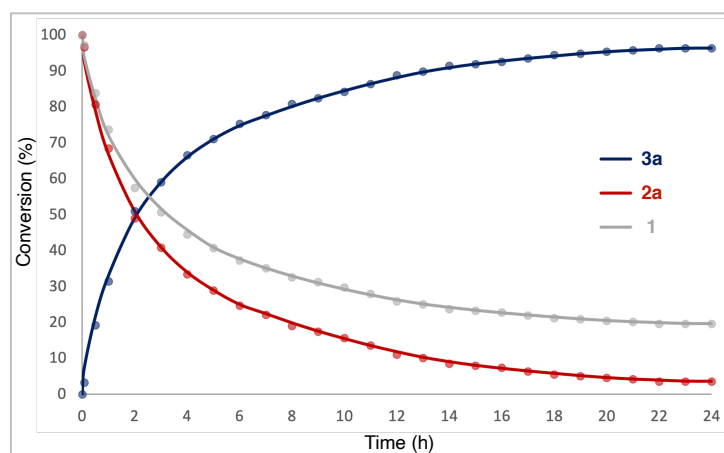

**Figure S33.** Initial Rate for **3a** Formation versus Variable Concentration of **1**

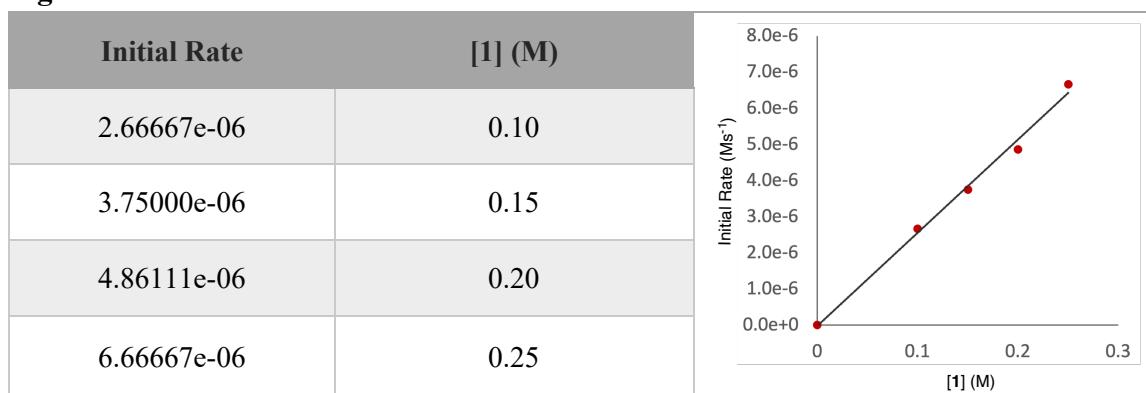

*The reaction is first-order in hydrazone 1.*

**Figure S34.** Initial Rate for **3a** Formation versus Variable Concentration of **2a**

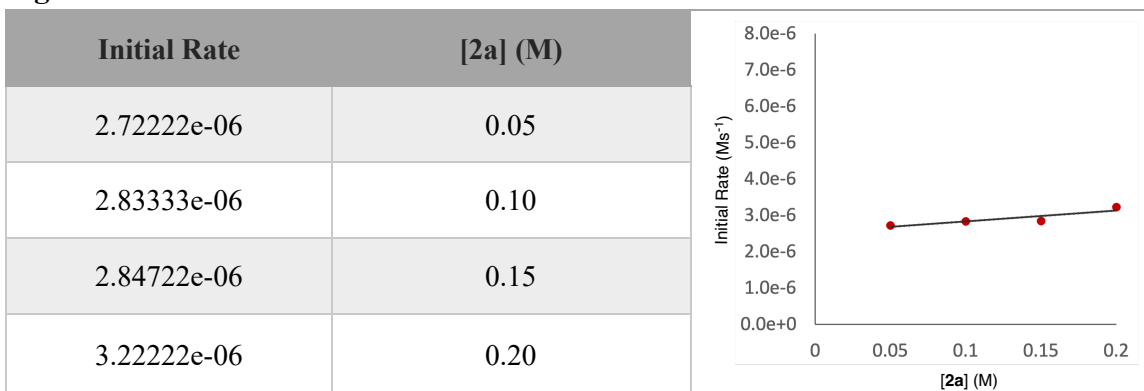

*The reaction is zero-order in olefin 2a.*

**Figure S35.** Initial Rate for **3a** Formation versus Variable Concentration of [Fe(**P3**)Cl]

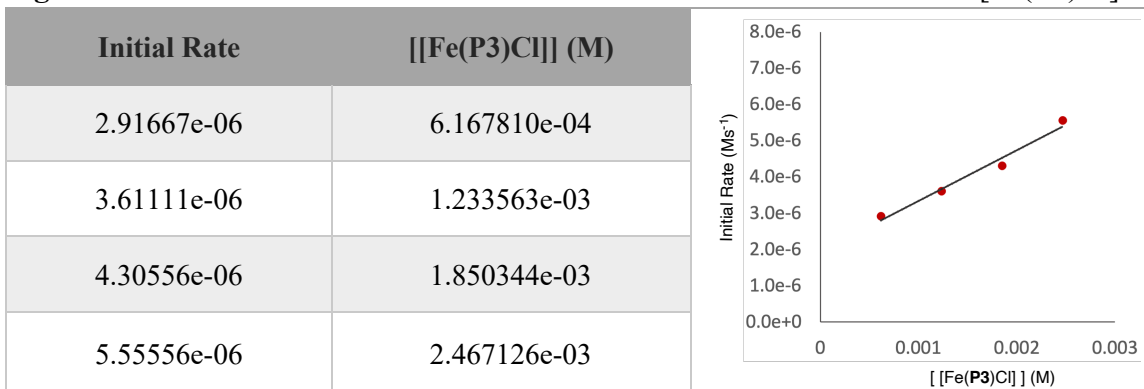

*The reaction is fractional-order (0.5 order) in catalyst [Fe(P3)Cl].*

## 7. X-ray Crystallography

The X-ray diffraction data were collected using Bruker-AXS SMART-APEXII CCD diffractometer ( $\text{CuK}\alpha$ ,  $\lambda = 1.54178 \text{ \AA}$ ). Indexing was performed using *APEX2*<sup>2</sup> (Difference Vectors method). Data integration and reduction were performed using SaintPlus.<sup>3</sup> Absorption correction was performed by multi-scan method implemented in SADABS.<sup>4</sup> Space groups were determined using XPREP implemented in APEX2.<sup>2</sup> The structure was solved using SHELXS-97 (direct methods) and refined using SHELXL97 contained in WinGX v1.70.01<sup>5,6,7</sup> program.

**Table S1. Crystal data and structure refinement for C<sub>84</sub>H<sub>96</sub>ClFeN<sub>8</sub>O<sub>4</sub> ([Fe(P2)Cl])**

CCDC: 2128685

|                                   |                                                                                                           |
|-----------------------------------|-----------------------------------------------------------------------------------------------------------|
| Identification code               | C <sub>84</sub> H <sub>96</sub> ClFeN <sub>8</sub> O <sub>4</sub>                                         |
| Empirical formula                 | C <sub>168.25</sub> H <sub>192.25</sub> Cl <sub>2.75</sub> Fe <sub>2</sub> N <sub>16</sub> O <sub>8</sub> |
| Formula weight                    | 2775.81                                                                                                   |
| Temperature                       | 123(2) K                                                                                                  |
| Wavelength                        | 1.54178 Å                                                                                                 |
| Crystal system                    | Hexagonal                                                                                                 |
| Space group                       | P6 <sub>5</sub>                                                                                           |
| Unit cell dimensions              | a = 29.9867(13) Å<br>b = 29.9867(13) Å<br>c = 30.2624(14) Å                                               |
| Volume                            | 23566(2) Å <sup>3</sup>                                                                                   |
| Z                                 | 6                                                                                                         |
| Density (calculated)              | 1.174 Mg/m <sup>3</sup>                                                                                   |
| Absorption coefficient            | 2.383 mm <sup>-1</sup>                                                                                    |
| F(000)                            | 8859                                                                                                      |
| Crystal size                      | 0.460 x 0.240 x 0.170 mm <sup>3</sup>                                                                     |
| Theta range for data collection   | 1.701 to 66.837°.                                                                                         |
| Index ranges                      | -33<=h<=35, -35<=k<=35, -35<=l<=35                                                                        |
| Reflections collected             | 159992                                                                                                    |
| Independent reflections           | 27672 [R(int) = 0.0497]                                                                                   |
| Completeness to theta = 66.837°   | 99.7 %                                                                                                    |
| Absorption correction             | Semi-empirical from equivalents                                                                           |
| Max. and min. transmission        | 0.7528 and 0.5524                                                                                         |
| Refinement method                 | Full-matrix least-squares on F <sup>2</sup>                                                               |
| Data / restraints / parameters    | 27672 / 1929 / 1888                                                                                       |
| Goodness-of-fit on F <sup>2</sup> | 1.042                                                                                                     |
| Final R indices [I>2sigma(I)]     | R1 = 0.0497, wR2 = 0.1185                                                                                 |
| R indices (all data)              | R1 = 0.0626, wR2 = 0.1275                                                                                 |
| Absolute structure parameter      | -0.0057(14)                                                                                               |
| Extinction coefficient            | n/a                                                                                                       |
| Largest diff. peak and hole       | 0.574 and -0.352 e.Å <sup>-3</sup>                                                                        |

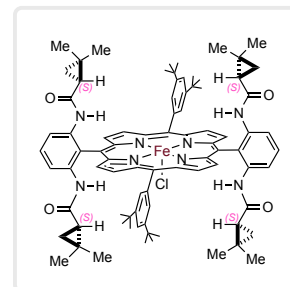

$\alpha = 90^\circ$ .  
 $\beta = 90^\circ$ .  
 $\gamma = 120^\circ$ .

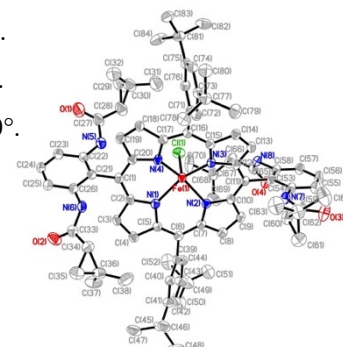

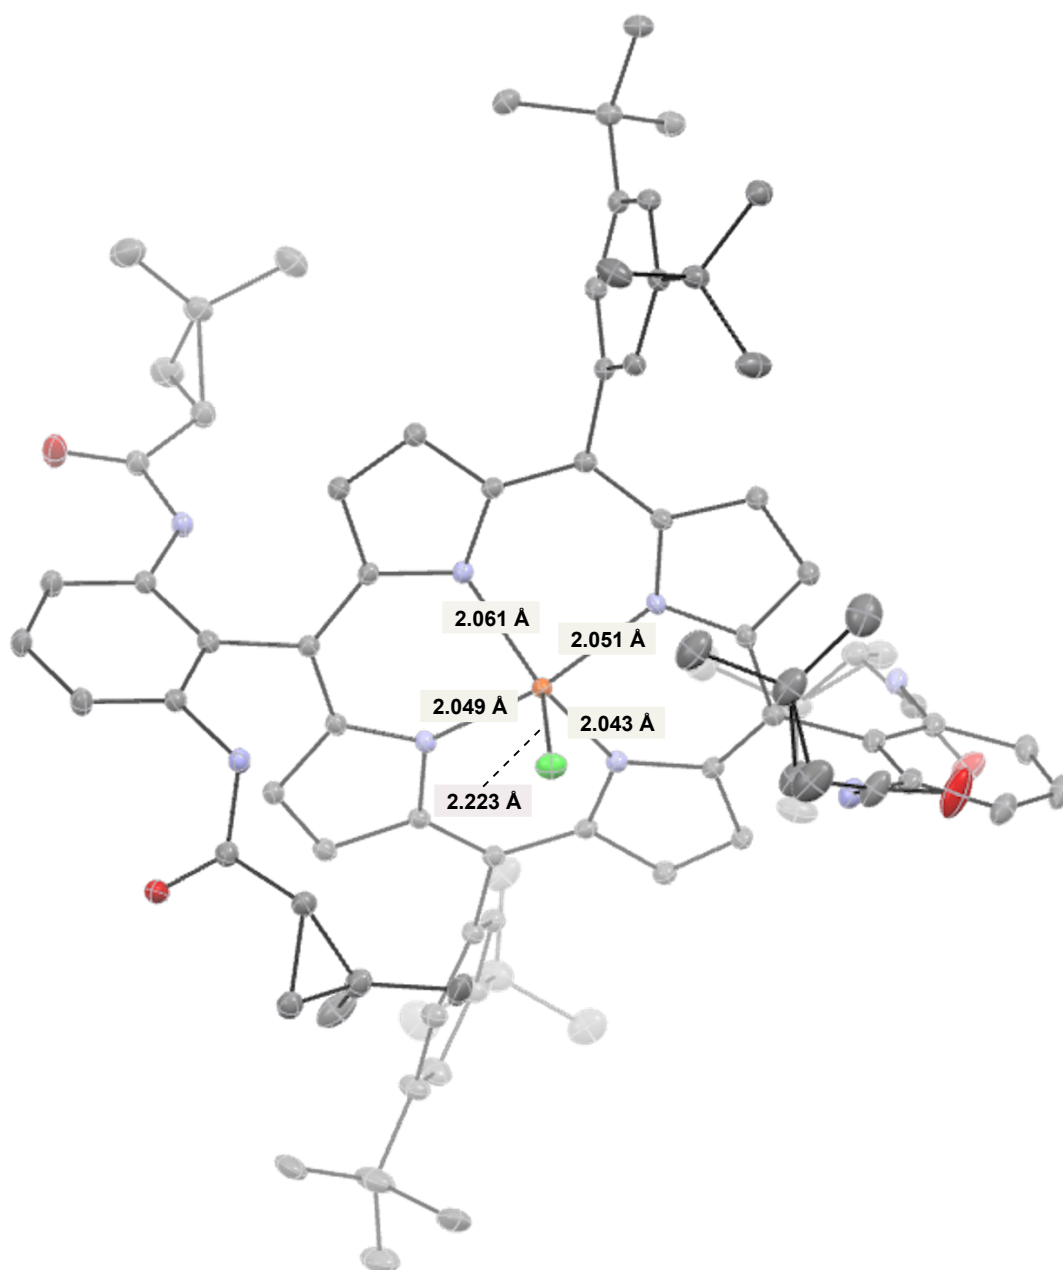

### [Fe(P2)Cl]

Fe-N<sub>p</sub>: 2.051(4) Å

Fe-C<sub>ip</sub>: 0.490 Å

Fe-C<sub>in</sub>: 0.477 Å

C<sub>in</sub>-N<sub>p</sub>: 1.994 Å

Fe-Cl: 2.2234(15) Å

N<sub>p</sub>: porphyrinato nitrogen. C<sub>ip</sub>: center of the plane of the 24-atom porphyrinato core. C<sub>in</sub>: center of the plane of the four N<sub>p</sub>.

**Table S2. Atomic coordinates (  $\times 10^4$ ) and equivalent isotropic displacement parameters ( $\text{\AA}^2 \times 10^3$ ) for C84H96ClFeN8O4 ([Fe(P2)Cl])**

U(eq) is defined as one third of the trace of the orthogonalized  $U^{ij}$  tensor.

|       | x        | y         | z        | U(eq)  |
|-------|----------|-----------|----------|--------|
| Fe(1) | 6962(1)  | 190(1)    | 5350(1)  | 30(1)  |
| Cl(1) | 6731(1)  | 410(1)    | 5975(1)  | 50(1)  |
| O(1)  | 4534(4)  | -1206(7)  | 6366(4)  | 94(4)  |
| O(1X) | 4630(30) | -1331(17) | 6300(20) | 87(10) |
| O(2)  | 4684(2)  | -1247(2)  | 3788(1)  | 64(1)  |
| O(3)  | 9974(2)  | 1393(2)   | 4897(2)  | 68(1)  |
| O(4)  | 8557(1)  | 2513(1)   | 6116(1)  | 49(1)  |
| N(1)  | 6466(1)  | 162(1)    | 4874(1)  | 32(1)  |
| N(2)  | 7491(1)  | 885(1)    | 5084(1)  | 32(1)  |
| N(3)  | 7575(1)  | 98(1)     | 5526(1)  | 30(1)  |
| N(4)  | 6513(1)  | -595(1)   | 5393(1)  | 32(1)  |
| N(5)  | 5117(2)  | -743(2)   | 5831(2)  | 50(1)  |
| N(6)  | 5181(2)  | -1282(2)  | 4337(1)  | 40(1)  |
| N(7)  | 9157(2)  | 1117(2)   | 5126(1)  | 39(1)  |
| N(8)  | 8358(2)  | 1690(2)   | 6203(1)  | 37(1)  |
| C(1)  | 5717(2)  | -673(2)   | 5089(2)  | 35(1)  |
| C(2)  | 5953(2)  | -217(2)   | 4845(2)  | 34(1)  |
| C(3)  | 5695(2)  | -72(2)    | 4526(2)  | 38(1)  |
| C(4)  | 6048(2)  | 384(2)    | 4351(2)  | 39(1)  |
| C(5)  | 6524(2)  | 546(2)    | 4579(2)  | 33(1)  |
| C(6)  | 6959(2)  | 1034(2)   | 4552(2)  | 32(1)  |
| C(7)  | 7402(2)  | 1198(2)   | 4810(2)  | 32(1)  |
| C(8)  | 7839(2)  | 1708(2)   | 4815(2)  | 38(1)  |
| C(9)  | 8193(2)  | 1707(2)   | 5092(2)  | 37(1)  |
| C(10) | 7981(2)  | 1190(2)   | 5252(2)  | 33(1)  |
| C(11) | 8248(2)  | 1012(2)   | 5507(2)  | 32(1)  |
| C(12) | 8060(2)  | 495(2)    | 5616(2)  | 32(1)  |
| C(13) | 8356(2)  | 301(2)    | 5828(2)  | 36(1)  |
| C(14) | 8053(2)  | -213(2)   | 5862(2)  | 36(1)  |
| C(15) | 7561(2)  | -338(2)   | 5682(2)  | 32(1)  |

|        |          |          |          |       |
|--------|----------|----------|----------|-------|
| C(16)  | 7120(2)  | -824(2)  | 5719(2)  | 33(1) |
| C(17)  | 6625(2)  | -930(2)  | 5605(2)  | 32(1) |
| C(18)  | 6158(2)  | -1411(2) | 5692(2)  | 37(1) |
| C(19)  | 5761(2)  | -1351(2) | 5545(2)  | 39(1) |
| C(20)  | 5986(2)  | -851(2)  | 5340(2)  | 34(1) |
| C(21)  | 5143(2)  | -999(2)  | 5079(2)  | 38(1) |
| C(22)  | 4856(2)  | -1017(2) | 5449(2)  | 42(1) |
| C(23)  | 4317(2)  | -1308(2) | 5441(2)  | 53(2) |
| C(24)  | 4078(2)  | -1592(2) | 5070(2)  | 55(2) |
| C(25)  | 4352(2)  | -1593(2) | 4702(2)  | 48(1) |
| C(26)  | 4883(2)  | -1293(2) | 4706(2)  | 40(1) |
| C(27)  | 4971(2)  | -878(3)  | 6260(2)  | 65(2) |
| C(28)  | 5386(3)  | -592(3)  | 6574(2)  | 69(2) |
| C(29)  | 5263(3)  | -673(4)  | 7062(2)  | 90(3) |
| C(30)  | 5567(3)  | -909(3)  | 6870(2)  | 71(2) |
| C(31)  | 6131(3)  | -645(4)  | 6947(3)  | 89(2) |
| C(32)  | 5311(3)  | -1477(4) | 6824(3)  | 91(2) |
| C(33)  | 5075(2)  | -1245(2) | 3903(2)  | 43(1) |
| C(34)  | 5492(2)  | -1181(2) | 3601(2)  | 48(1) |
| C(35)  | 5394(3)  | -1260(2) | 3111(2)  | 59(2) |
| C(36)  | 5733(3)  | -732(2)  | 3276(2)  | 55(1) |
| C(37)  | 5539(3)  | -357(3)  | 3253(2)  | 70(2) |
| C(38)  | 6305(3)  | -494(3)  | 3217(3)  | 82(2) |
| C(39)  | 6948(2)  | 1409(2)  | 4231(2)  | 35(1) |
| C(40)  | 6896(2)  | 1300(2)  | 3783(2)  | 38(1) |
| C(41)  | 6888(2)  | 1640(2)  | 3473(2)  | 46(1) |
| C(42)  | 6931(2)  | 2093(2)  | 3637(2)  | 56(2) |
| C(43)  | 6983(2)  | 2220(2)  | 4080(2)  | 52(1) |
| C(44)  | 6993(2)  | 1866(2)  | 4378(2)  | 42(1) |
| C(45)  | 6833(3)  | 1519(3)  | 2978(2)  | 63(2) |
| C(46)  | 6987(9)  | 1125(8)  | 2856(6)  | 60(5) |
| C(47)  | 6269(7)  | 1325(10) | 2854(6)  | 70(5) |
| C(48)  | 7169(9)  | 2013(6)  | 2706(5)  | 75(5) |
| C(46X) | 6777(8)  | 983(6)   | 2868(7)  | 42(5) |
| C(47X) | 6427(10) | 1554(13) | 2747(10) | 86(9) |
| C(48X) | 7395(8)  | 1896(10) | 2758(9)  | 84(7) |



|        |          |          |          |         |
|--------|----------|----------|----------|---------|
| C(46Y) | 7306(14) | 1590(17) | 2812(14) | 98(11)  |
| C(47Y) | 6376(16) | 961(14)  | 2942(16) | 121(14) |
| C(48Y) | 6676(14) | 1869(13) | 2739(11) | 80(9)   |
| C(49)  | 7013(3)  | 2717(3)  | 4237(3)  | 79(2)   |
| C(50)  | 6861(10) | 2995(9)  | 3938(8)  | 90(7)   |
| C(51)  | 7458(7)  | 3011(6)  | 4524(7)  | 70(5)   |
| C(52)  | 6503(6)  | 2517(6)  | 4616(6)  | 76(5)   |
| C(50X) | 6604(8)  | 2768(9)  | 4096(9)  | 110(8)  |
| C(51X) | 7536(7)  | 3182(4)  | 3950(5)  | 93(6)   |
| C(52X) | 7225(7)  | 2869(6)  | 4708(5)  | 67(4)   |
| C(53)  | 8773(2)  | 1411(2)  | 5665(2)  | 34(1)   |
| C(54)  | 9224(2)  | 1468(2)  | 5465(2)  | 36(1)   |
| C(55)  | 9702(2)  | 1859(2)  | 5602(2)  | 44(1)   |
| C(56)  | 9733(2)  | 2188(2)  | 5938(2)  | 47(1)   |
| C(57)  | 9297(2)  | 2141(2)  | 6141(2)  | 43(1)   |
| C(58)  | 8815(2)  | 1747(2)  | 6000(2)  | 36(1)   |
| C(59)  | 9521(2)  | 1092(2)  | 4867(2)  | 43(1)   |
| C(60)  | 9287(2)  | 651(2)   | 4554(2)  | 48(1)   |
| C(61)  | 9578(3)  | 667(3)   | 4143(2)  | 62(2)   |
| C(62)  | 9506(2)  | 296(2)   | 4490(2)  | 54(1)   |
| C(63)  | 9111(3)  | -263(2)  | 4409(3)  | 77(2)   |
| C(64)  | 9961(3)  | 376(3)   | 4759(3)  | 81(2)   |
| C(65)  | 8252(2)  | 2079(2)  | 6239(2)  | 40(1)   |
| C(66)  | 7742(2)  | 1928(2)  | 6444(2)  | 44(1)   |
| C(67)  | 7626(2)  | 2349(2)  | 6567(2)  | 48(1)   |
| C(68)  | 7333(2)  | 2000(2)  | 6197(2)  | 55(1)   |
| C(69)  | 7428(3)  | 2203(4)  | 5738(2)  | 80(2)   |
| C(70)  | 6780(2)  | 1591(3)  | 6299(3)  | 80(2)   |
| C(71)  | 7177(2)  | -1248(2) | 5918(2)  | 32(1)   |
| C(72)  | 7382(2)  | -1496(2) | 5676(2)  | 35(1)   |
| C(73)  | 7410(2)  | -1909(2) | 5860(2)  | 34(1)   |
| C(74)  | 7227(2)  | -2062(2) | 6284(2)  | 35(1)   |
| C(75)  | 7015(2)  | -1821(2) | 6534(2)  | 34(1)   |
| C(76)  | 7000(2)  | -1406(2) | 6343(2)  | 35(1)   |
| C(77)  | 7639(2)  | -2176(2) | 5582(2)  | 40(1)   |
| C(78)  | 7325(2)  | -2383(2) | 5157(2)  | 48(1)   |

|       |          |           |          |       |
|-------|----------|-----------|----------|-------|
| C(79) | 8205(2)  | -1787(2)  | 5468(2)  | 52(1) |
| C(80) | 7627(2)  | -2628(2)  | 5830(2)  | 47(1) |
| C(81) | 6797(2)  | -2004(2)  | 6995(2)  | 42(1) |
| C(82) | 7206(3)  | -1692(2)  | 7343(2)  | 59(2) |
| C(83) | 6612(2)  | -2577(2)  | 7056(2)  | 47(1) |
| C(84) | 6328(3)  | -1930(3)  | 7073(2)  | 66(2) |
| Fe(2) | 3092(1)  | 9451(1)   | 5312(1)  | 32(1) |
| Cl(2) | 3282(1)  | 9175(1)   | 5928(1)  | 51(1) |
| O(5)  | 5368(6)  | 10733(8)  | 6414(7)  | 89(6) |
| O(6)  | 5490(6)  | 10979(9)  | 3846(8)  | 62(4) |
| O(5X) | 5438(7)  | 10569(13) | 6385(11) | 74(6) |
| O(6X) | 5363(10) | 10785(12) | 3825(12) | 55(5) |
| O(7)  | 165(2)   | 8641(2)   | 5196(2)  | 62(1) |
| O(8)  | 1390(2)  | 7098(1)   | 6165(2)  | 66(1) |
| N(9)  | 3595(2)  | 9468(2)   | 4849(1)  | 35(1) |
| N(10) | 2557(2)  | 8762(2)   | 5037(1)  | 35(1) |
| N(11) | 2493(1)  | 9561(1)   | 5484(1)  | 32(1) |
| N(12) | 3554(1)  | 10240(1)  | 5360(1)  | 32(1) |
| N(13) | 4867(2)  | 10253(2)  | 5832(2)  | 50(1) |
| N(14) | 4958(2)  | 10962(2)  | 4378(2)  | 42(1) |
| N(15) | 897(2)   | 8599(2)   | 5116(2)  | 41(1) |
| N(16) | 1682(2)  | 7947(2)   | 6129(2)  | 43(1) |
| C(85) | 4347(2)  | 10294(2)  | 5078(2)  | 38(1) |
| C(86) | 4108(2)  | 9837(2)   | 4836(2)  | 38(1) |
| C(87) | 4377(2)  | 9685(2)   | 4526(2)  | 43(1) |
| C(88) | 4020(2)  | 9233(2)   | 4344(2)  | 44(1) |
| C(89) | 3536(2)  | 9080(2)   | 4559(2)  | 37(1) |
| C(90) | 3096(2)  | 8598(2)   | 4522(2)  | 38(1) |
| C(91) | 2643(2)  | 8443(2)   | 4767(2)  | 37(1) |
| C(92) | 2193(2)  | 7941(2)   | 4764(2)  | 41(1) |
| C(93) | 1840(2)  | 7952(2)   | 5030(2)  | 41(1) |
| C(94) | 2067(2)  | 8474(2)   | 5197(2)  | 36(1) |
| C(95) | 1806(2)  | 8652(2)   | 5454(2)  | 35(1) |
| C(96) | 2000(2)  | 9170(2)   | 5571(2)  | 35(1) |
| C(97) | 1711(2)  | 9374(2)   | 5782(2)  | 38(1) |
| C(98) | 2022(2)  | 9884(2)   | 5819(2)  | 38(1) |

|        |          |           |          |        |
|--------|----------|-----------|----------|--------|
| C(99)  | 2515(2)  | 10004(2)  | 5645(2)  | 35(1)  |
| C(100) | 2959(2)  | 10485(2)  | 5680(2)  | 36(1)  |
| C(101) | 3448(2)  | 10584(2)  | 5566(2)  | 35(1)  |
| C(102) | 3918(2)  | 11063(2)  | 5649(2)  | 43(1)  |
| C(103) | 4313(2)  | 10995(2)  | 5504(2)  | 46(1)  |
| C(104) | 4079(2)  | 10488(2)  | 5312(2)  | 38(1)  |
| C(105) | 4922(2)  | 10596(2)  | 5097(2)  | 40(1)  |
| C(106) | 5171(2)  | 10560(2)  | 5477(2)  | 46(1)  |
| C(107) | 5705(2)  | 10823(3)  | 5499(2)  | 56(2)  |
| C(108) | 5984(2)  | 11132(3)  | 5151(2)  | 60(2)  |
| C(109) | 5746(2)  | 11189(2)  | 4777(2)  | 52(1)  |
| C(110) | 5218(2)  | 10916(2)  | 4749(2)  | 43(1)  |
| C(111) | 4978(2)  | 10336(3)  | 6269(2)  | 60(2)  |
| C(112) | 4540(3)  | 10017(3)  | 6559(2)  | 71(2)  |
| C(113) | 4623(3)  | 10047(4)  | 7057(2)  | 95(3)  |
| C(114) | 4342(3)  | 10288(4)  | 6867(2)  | 86(2)  |
| C(115) | 3769(4)  | 10095(10) | 6895(4)  | 81(6)  |
| C(116) | 4639(9)  | 10915(8)  | 6856(5)  | 103(5) |
| C(615) | 3746(8)  | 9825(14)  | 6946(10) | 78(9)  |
| C(616) | 4446(16) | 10743(15) | 6899(14) | 89(11) |
| C(117) | 5077(2)  | 10948(2)  | 3949(2)  | 51(1)  |
| C(118) | 4702(2)  | 10955(2)  | 3633(2)  | 51(1)  |
| C(119) | 4825(3)  | 11050(3)  | 3156(2)  | 65(2)  |
| C(120) | 4435(3)  | 10527(3)  | 3296(2)  | 61(2)  |
| C(121) | 4577(5)  | 10117(3)  | 3271(3)  | 101(3) |
| C(122) | 3877(3)  | 10354(4)  | 3213(3)  | 96(3)  |
| C(123) | 3104(2)  | 8222(2)   | 4198(2)  | 38(1)  |
| C(124) | 3192(2)  | 8354(2)   | 3756(2)  | 45(1)  |
| C(125) | 3197(2)  | 8016(2)   | 3438(2)  | 50(1)  |
| C(126) | 3111(2)  | 7545(2)   | 3588(2)  | 56(2)  |
| C(127) | 3017(2)  | 7393(2)   | 4027(2)  | 52(1)  |
| C(128) | 3020(2)  | 7744(2)   | 4330(2)  | 42(1)  |
| C(129) | 3307(3)  | 8184(3)   | 2955(2)  | 62(2)  |
| C(130) | 3037(6)  | 8462(5)   | 2782(4)  | 55(1)  |
| C(131) | 3883(5)  | 8477(5)   | 2904(4)  | 68(2)  |
| C(132) | 3129(5)  | 7681(5)   | 2663(4)  | 58(1)  |

|        |          |           |          |         |
|--------|----------|-----------|----------|---------|
| C(630) | 2827(5)  | 8222(6)   | 2792(5)  | 55(1)   |
| C(631) | 3792(5)  | 8717(5)   | 2906(4)  | 58(1)   |
| C(632) | 3369(8)  | 7849(6)   | 2640(5)  | 68(2)   |
| C(133) | 2934(3)  | 6874(3)   | 4185(3)  | 70(2)   |
| C(134) | 2844(6)  | 6501(4)   | 3821(4)  | 87(4)   |
| C(135) | 3367(5)  | 6949(4)   | 4500(5)  | 95(5)   |
| C(136) | 2429(5)  | 6605(4)   | 4477(4)  | 78(4)   |
| C(634) | 2576(15) | 6473(15)  | 3864(12) | 118(16) |
| C(635) | 3498(10) | 6958(14)  | 4073(13) | 106(12) |
| C(636) | 2852(12) | 6778(11)  | 4651(7)  | 77(9)   |
| C(137) | 1282(2)  | 8267(2)   | 5621(2)  | 37(1)   |
| C(138) | 1234(2)  | 7924(2)   | 5953(2)  | 39(1)   |
| C(139) | 754(2)   | 7569(2)   | 6121(2)  | 49(1)   |
| C(140) | 321(2)   | 7561(2)   | 5950(2)  | 54(1)   |
| C(141) | 356(2)   | 7892(2)   | 5616(2)  | 48(1)   |
| C(142) | 838(2)   | 8248(2)   | 5454(2)  | 42(1)   |
| C(143) | 1737(2)  | 7536(2)   | 6227(2)  | 47(1)   |
| C(144) | 2250(2)  | 7669(2)   | 6400(2)  | 53(1)   |
| C(145) | 2329(3)  | 7235(3)   | 6571(2)  | 62(2)   |
| C(146) | 2594(2)  | 7505(2)   | 6160(2)  | 58(2)   |
| C(147) | 3161(3)  | 7886(3)   | 6187(4)  | 102(3)  |
| C(148) | 2414(3)  | 7227(3)   | 5733(2)  | 82(2)   |
| C(149) | 588(2)   | 8805(2)   | 5031(2)  | 44(1)   |
| C(150) | 824(2)   | 9250(2)   | 4726(2)  | 47(1)   |
| C(151) | 500(3)   | 9457(2)   | 4532(2)  | 56(2)   |
| C(152) | 898(2)   | 9772(2)   | 4874(2)  | 47(1)   |
| C(153) | 729(3)   | 9826(2)   | 5329(2)  | 59(2)   |
| C(154) | 1388(2)  | 10240(2)  | 4717(2)  | 62(2)   |
| C(155) | 2911(2)  | 10915(2)  | 5885(2)  | 34(1)   |
| C(156) | 2963(2)  | 10988(2)  | 6336(2)  | 36(1)   |
| C(157) | 2939(2)  | 11392(2)  | 6540(2)  | 38(1)   |
| C(158) | 2858(2)  | 11721(2)  | 6268(2)  | 38(1)   |
| C(159) | 2806(2)  | 11661(2)  | 5812(2)  | 37(1)   |
| C(160) | 2836(2)  | 11253(2)  | 5621(2)  | 37(1)   |
| C(161) | 2987(2)  | 11448(2)  | 7037(2)  | 50(1)   |
| C(162) | 3406(10) | 11362(12) | 7217(9)  | 73(5)   |

|        |          |           |          |        |
|--------|----------|-----------|----------|--------|
| C(163) | 2453(9)  | 11038(8)  | 7218(9)  | 83(6)  |
| C(164) | 3072(11) | 11968(7)  | 7193(16) | 45(3)  |
| C(662) | 3531(12) | 11530(20) | 7139(18) | 73(5)  |
| C(663) | 2599(19) | 10986(16) | 7308(15) | 83(6)  |
| C(664) | 3000(30) | 11933(16) | 7210(30) | 45(3)  |
| C(165) | 2702(2)  | 12014(2)  | 5514(2)  | 43(1)  |
| C(166) | 2150(2)  | 11692(3)  | 5337(2)  | 58(1)  |
| C(167) | 2747(3)  | 12475(3)  | 5777(2)  | 68(2)  |
| C(168) | 3083(2)  | 12218(2)  | 5135(2)  | 55(1)  |
| C(1S)  | 5640(13) | 11913(14) | 6211(11) | 85(9)  |
| Cl(1S) | 5836(4)  | 12066(4)  | 5735(4)  | 109(3) |
| Cl(2S) | 5130(5)  | 11994(5)  | 6347(4)  | 130(4) |
| Cl(3S) | 6117(6)  | 12168(6)  | 6632(5)  | 144(4) |

---

**Table S3. Bond lengths [Å] and angles [°] for C<sub>84</sub>H<sub>96</sub>ClFeN<sub>8</sub>O<sub>4</sub> ([Fe(P<sub>2</sub>)Cl])**

---

|             |            |
|-------------|------------|
| Fe(1)-N(1)  | 2.043(4)   |
| Fe(1)-N(2)  | 2.049(4)   |
| Fe(1)-N(4)  | 2.051(4)   |
| Fe(1)-N(3)  | 2.061(4)   |
| Fe(1)-Cl(1) | 2.2234(15) |
| O(1)-C(27)  | 1.225(10)  |
| O(2)-C(33)  | 1.218(6)   |
| O(3)-C(59)  | 1.201(6)   |
| O(4)-C(65)  | 1.216(6)   |
| N(1)-C(2)   | 1.386(6)   |
| N(1)-C(5)   | 1.395(6)   |
| N(2)-C(7)   | 1.377(6)   |
| N(2)-C(10)  | 1.382(6)   |
| N(3)-C(12)  | 1.371(6)   |
| N(3)-C(15)  | 1.372(6)   |
| N(4)-C(17)  | 1.368(6)   |
| N(4)-C(20)  | 1.377(6)   |
| N(5)-C(27)  | 1.364(8)   |
| N(5)-C(22)  | 1.408(7)   |
| N(5)-H(5N)  | 0.8800     |
| N(6)-C(33)  | 1.368(7)   |
| N(6)-C(26)  | 1.419(7)   |
| N(6)-H(6N)  | 0.8800     |
| N(7)-C(59)  | 1.374(6)   |
| N(7)-C(54)  | 1.413(6)   |
| N(7)-H(7N)  | 0.8800     |
| N(8)-C(65)  | 1.358(7)   |
| N(8)-C(58)  | 1.431(6)   |
| N(8)-H(8N)  | 0.8800     |
| C(1)-C(20)  | 1.395(7)   |
| C(1)-C(2)   | 1.396(7)   |
| C(1)-C(21)  | 1.495(7)   |
| C(2)-C(3)   | 1.432(7)   |
| C(3)-C(4)   | 1.353(7)   |

|             |          |
|-------------|----------|
| C(3)-H(3)   | 0.9500   |
| C(4)-C(5)   | 1.437(7) |
| C(4)-H(4)   | 0.9500   |
| C(5)-C(6)   | 1.393(7) |
| C(6)-C(7)   | 1.400(7) |
| C(6)-C(39)  | 1.500(6) |
| C(7)-C(8)   | 1.434(7) |
| C(8)-C(9)   | 1.354(7) |
| C(8)-H(8)   | 0.9500   |
| C(9)-C(10)  | 1.432(7) |
| C(9)-H(9)   | 0.9500   |
| C(10)-C(11) | 1.399(7) |
| C(11)-C(12) | 1.396(6) |
| C(11)-C(53) | 1.503(6) |
| C(12)-C(13) | 1.432(7) |
| C(13)-C(14) | 1.348(7) |
| C(13)-H(13) | 0.9500   |
| C(14)-C(15) | 1.434(6) |
| C(14)-H(14) | 0.9500   |
| C(15)-C(16) | 1.400(7) |
| C(16)-C(17) | 1.398(7) |
| C(16)-C(71) | 1.491(6) |
| C(17)-C(18) | 1.445(6) |
| C(18)-C(19) | 1.365(7) |
| C(18)-H(18) | 0.9500   |
| C(19)-C(20) | 1.441(7) |
| C(19)-H(19) | 0.9500   |
| C(21)-C(22) | 1.393(7) |
| C(21)-C(26) | 1.406(7) |
| C(22)-C(23) | 1.401(7) |
| C(23)-C(24) | 1.375(9) |
| C(23)-H(23) | 0.9500   |
| C(24)-C(25) | 1.385(8) |
| C(24)-H(24) | 0.9500   |
| C(25)-C(26) | 1.383(7) |
| C(25)-H(25) | 0.9500   |

|              |           |
|--------------|-----------|
| C(27)-C(28)  | 1.458(9)  |
| C(28)-C(29)  | 1.512(10) |
| C(28)-C(30)  | 1.584(10) |
| C(28)-H(28)  | 1.0000    |
| C(29)-C(30)  | 1.521(11) |
| C(29)-H(29A) | 0.9900    |
| C(29)-H(29B) | 0.9900    |
| C(30)-C(31)  | 1.484(10) |
| C(30)-C(32)  | 1.485(12) |
| C(31)-H(31A) | 0.9800    |
| C(31)-H(31B) | 0.9800    |
| C(31)-H(31C) | 0.9800    |
| C(32)-H(32A) | 0.9800    |
| C(32)-H(32B) | 0.9800    |
| C(32)-H(32C) | 0.9800    |
| C(33)-C(34)  | 1.482(8)  |
| C(34)-C(35)  | 1.507(9)  |
| C(34)-C(36)  | 1.528(8)  |
| C(34)-H(34)  | 1.0000    |
| C(35)-C(36)  | 1.477(9)  |
| C(35)-H(35A) | 0.9900    |
| C(35)-H(35B) | 0.9900    |
| C(36)-C(38)  | 1.501(9)  |
| C(36)-C(37)  | 1.504(8)  |
| C(37)-H(37A) | 0.9800    |
| C(37)-H(37B) | 0.9800    |
| C(37)-H(37C) | 0.9800    |
| C(38)-H(38A) | 0.9800    |
| C(38)-H(38B) | 0.9800    |
| C(38)-H(38C) | 0.9800    |
| C(39)-C(44)  | 1.382(7)  |
| C(39)-C(40)  | 1.384(7)  |
| C(40)-C(41)  | 1.395(7)  |
| C(40)-H(40)  | 0.9500    |
| C(41)-C(42)  | 1.390(8)  |
| C(41)-C(45)  | 1.531(8)  |



|              |           |
|--------------|-----------|
| C(42)-C(43)  | 1.382(9)  |
| C(42)-H(42)  | 0.9500    |
| C(43)-C(44)  | 1.404(7)  |
| C(43)-C(49)  | 1.522(8)  |
| C(44)-H(44)  | 0.9500    |
| C(45)-C(46)  | 1.513(15) |
| C(45)-C(47)  | 1.535(16) |
| C(45)-C(48)  | 1.547(15) |
| C(46)-H(46A) | 0.9800    |
| C(46)-H(46B) | 0.9800    |
| C(46)-H(46C) | 0.9800    |
| C(47)-H(47A) | 0.9800    |
| C(47)-H(47B) | 0.9800    |
| C(47)-H(47C) | 0.9800    |
| C(48)-H(48A) | 0.9800    |
| C(48)-H(48B) | 0.9800    |
| C(48)-H(48C) | 0.9800    |
| C(49)-C(50)  | 1.451(16) |
| C(49)-C(51)  | 1.462(17) |
| C(49)-C(52)  | 1.760(17) |
| C(50)-H(50A) | 0.9800    |
| C(50)-H(50B) | 0.9800    |
| C(50)-H(50C) | 0.9800    |
| C(51)-H(51A) | 0.9800    |
| C(51)-H(51B) | 0.9800    |
| C(51)-H(51C) | 0.9800    |
| C(52)-H(52A) | 0.9800    |
| C(52)-H(52B) | 0.9800    |
| C(52)-H(52C) | 0.9800    |
| C(53)-C(58)  | 1.389(7)  |
| C(53)-C(54)  | 1.410(7)  |
| C(54)-C(55)  | 1.386(7)  |
| C(55)-C(56)  | 1.385(7)  |
| C(55)-H(55)  | 0.9500    |
| C(56)-C(57)  | 1.386(7)  |
| C(56)-H(56)  | 0.9500    |

|              |           |
|--------------|-----------|
| C(57)-C(58)  | 1.401(7)  |
| C(57)-H(57)  | 0.9500    |
| C(59)-C(60)  | 1.485(7)  |
| C(60)-C(61)  | 1.508(8)  |
| C(60)-C(62)  | 1.521(8)  |
| C(60)-H(60)  | 1.0000    |
| C(61)-C(62)  | 1.464(9)  |
| C(61)-H(61A) | 0.9900    |
| C(61)-H(61B) | 0.9900    |
| C(62)-C(64)  | 1.501(9)  |
| C(62)-C(63)  | 1.511(8)  |
| C(63)-H(63A) | 0.9800    |
| C(63)-H(63B) | 0.9800    |
| C(63)-H(63C) | 0.9800    |
| C(64)-H(64A) | 0.9800    |
| C(64)-H(64B) | 0.9800    |
| C(64)-H(64C) | 0.9800    |
| C(65)-C(66)  | 1.495(7)  |
| C(66)-C(67)  | 1.515(7)  |
| C(66)-C(68)  | 1.544(8)  |
| C(66)-H(66)  | 1.0000    |
| C(67)-C(68)  | 1.486(8)  |
| C(67)-H(67A) | 0.9900    |
| C(67)-H(67B) | 0.9900    |
| C(68)-C(69)  | 1.486(10) |
| C(68)-C(70)  | 1.520(9)  |
| C(69)-H(69A) | 0.9800    |
| C(69)-H(69B) | 0.9800    |
| C(69)-H(69C) | 0.9800    |
| C(70)-H(70A) | 0.9800    |
| C(70)-H(70B) | 0.9800    |
| C(70)-H(70C) | 0.9800    |
| C(71)-C(76)  | 1.382(7)  |
| C(71)-C(72)  | 1.386(7)  |
| C(72)-C(73)  | 1.402(7)  |
| C(72)-H(72)  | 0.9500    |

|              |            |
|--------------|------------|
| C(73)-C(74)  | 1.381(7)   |
| C(73)-C(77)  | 1.537(7)   |
| C(74)-C(75)  | 1.396(7)   |
| C(74)-H(74)  | 0.9500     |
| C(75)-C(76)  | 1.395(7)   |
| C(75)-C(81)  | 1.524(7)   |
| C(76)-H(76)  | 0.9500     |
| C(77)-C(78)  | 1.531(7)   |
| C(77)-C(80)  | 1.534(7)   |
| C(77)-C(79)  | 1.542(7)   |
| C(78)-H(78A) | 0.9800     |
| C(78)-H(78B) | 0.9800     |
| C(78)-H(78C) | 0.9800     |
| C(79)-H(79A) | 0.9800     |
| C(79)-H(79B) | 0.9800     |
| C(79)-H(79C) | 0.9800     |
| C(80)-H(80A) | 0.9800     |
| C(80)-H(80B) | 0.9800     |
| C(80)-H(80C) | 0.9800     |
| C(81)-C(82)  | 1.530(8)   |
| C(81)-C(83)  | 1.530(7)   |
| C(81)-C(84)  | 1.547(8)   |
| C(82)-H(82A) | 0.9800     |
| C(82)-H(82B) | 0.9800     |
| C(82)-H(82C) | 0.9800     |
| C(83)-H(83A) | 0.9800     |
| C(83)-H(83B) | 0.9800     |
| C(83)-H(83C) | 0.9800     |
| C(84)-H(84A) | 0.9800     |
| C(84)-H(84B) | 0.9800     |
| C(84)-H(84C) | 0.9800     |
| Fe(2)-N(9)   | 2.039(4)   |
| Fe(2)-N(11)  | 2.050(4)   |
| Fe(2)-N(10)  | 2.056(4)   |
| Fe(2)-N(12)  | 2.063(4)   |
| Fe(2)-Cl(2)  | 2.2254(15) |

|              |           |
|--------------|-----------|
| O(5)-C(111)  | 1.259(13) |
| O(6)-C(117)  | 1.234(12) |
| O(7)-C(149)  | 1.214(7)  |
| O(8)-C(143)  | 1.215(7)  |
| N(9)-C(86)   | 1.373(6)  |
| N(9)-C(89)   | 1.398(6)  |
| N(10)-C(94)  | 1.366(6)  |
| N(10)-C(91)  | 1.377(6)  |
| N(11)-C(96)  | 1.379(6)  |
| N(11)-C(99)  | 1.385(6)  |
| N(12)-C(104) | 1.371(6)  |
| N(12)-C(101) | 1.373(6)  |
| N(13)-C(111) | 1.355(8)  |
| N(13)-C(106) | 1.413(7)  |
| N(13)-H(13N) | 0.8800    |
| N(14)-C(117) | 1.353(7)  |
| N(14)-C(110) | 1.413(7)  |
| N(14)-H(14N) | 0.8800    |
| N(15)-C(149) | 1.372(7)  |
| N(15)-C(142) | 1.416(7)  |
| N(15)-H(15N) | 0.8800    |
| N(16)-C(143) | 1.357(7)  |
| N(16)-C(138) | 1.414(7)  |
| N(16)-H(16N) | 0.8800    |
| C(85)-C(86)  | 1.395(7)  |
| C(85)-C(104) | 1.398(7)  |
| C(85)-C(105) | 1.495(7)  |
| C(86)-C(87)  | 1.450(7)  |
| C(87)-C(88)  | 1.355(8)  |
| C(87)-H(87)  | 0.9500    |
| C(88)-C(89)  | 1.441(7)  |
| C(88)-H(88)  | 0.9500    |
| C(89)-C(90)  | 1.392(7)  |
| C(90)-C(91)  | 1.406(7)  |
| C(90)-C(123) | 1.502(7)  |
| C(91)-C(92)  | 1.434(7)  |

|               |           |
|---------------|-----------|
| C(92)-C(93)   | 1.345(7)  |
| C(92)-H(92)   | 0.9500    |
| C(93)-C(94)   | 1.449(7)  |
| C(93)-H(93)   | 0.9500    |
| C(94)-C(95)   | 1.388(7)  |
| C(95)-C(96)   | 1.402(7)  |
| C(95)-C(137)  | 1.499(7)  |
| C(96)-C(97)   | 1.437(7)  |
| C(97)-C(98)   | 1.341(7)  |
| C(97)-H(97)   | 0.9500    |
| C(98)-C(99)   | 1.434(7)  |
| C(98)-H(98)   | 0.9500    |
| C(99)-C(100)  | 1.395(7)  |
| C(100)-C(101) | 1.386(7)  |
| C(100)-C(155) | 1.502(6)  |
| C(101)-C(102) | 1.443(7)  |
| C(102)-C(103) | 1.369(7)  |
| C(102)-H(102) | 0.9500    |
| C(103)-C(104) | 1.442(7)  |
| C(103)-H(103) | 0.9500    |
| C(105)-C(110) | 1.403(8)  |
| C(105)-C(106) | 1.403(8)  |
| C(106)-C(107) | 1.388(8)  |
| C(107)-C(108) | 1.376(9)  |
| C(107)-H(107) | 0.9500    |
| C(108)-C(109) | 1.392(9)  |
| C(108)-H(108) | 0.9500    |
| C(109)-C(110) | 1.374(8)  |
| C(109)-H(109) | 0.9500    |
| C(111)-C(112) | 1.469(9)  |
| C(112)-C(113) | 1.523(10) |
| C(112)-C(114) | 1.538(11) |
| C(112)-H(112) | 1.0000    |
| C(113)-C(114) | 1.474(12) |
| C(113)-H(11A) | 0.9900    |
| C(113)-H(11B) | 0.9900    |

|               |           |
|---------------|-----------|
| C(114)-C(115) | 1.516(13) |
| C(114)-C(116) | 1.63(2)   |
| C(115)-H(11C) | 0.9800    |
| C(115)-H(11D) | 0.9800    |
| C(115)-H(11E) | 0.9800    |
| C(116)-H(11F) | 0.9800    |
| C(116)-H(11G) | 0.9800    |
| C(116)-H(11H) | 0.9800    |
| C(117)-C(118) | 1.483(8)  |
| C(118)-C(119) | 1.484(9)  |
| C(118)-C(120) | 1.519(9)  |
| C(118)-H(118) | 1.0000    |
| C(119)-C(120) | 1.475(9)  |
| C(119)-H(11I) | 0.9900    |
| C(119)-H(11J) | 0.9900    |
| C(120)-C(121) | 1.490(10) |
| C(120)-C(122) | 1.505(11) |
| C(121)-H(12A) | 0.9800    |
| C(121)-H(12B) | 0.9800    |
| C(121)-H(12C) | 0.9800    |
| C(122)-H(12D) | 0.9800    |
| C(122)-H(12E) | 0.9800    |
| C(122)-H(12F) | 0.9800    |
| C(123)-C(124) | 1.381(8)  |
| C(123)-C(128) | 1.384(7)  |
| C(124)-C(125) | 1.403(7)  |
| C(124)-H(124) | 0.9500    |
| C(125)-C(126) | 1.380(9)  |
| C(125)-C(129) | 1.528(9)  |
| C(126)-C(127) | 1.386(9)  |
| C(126)-H(126) | 0.9500    |
| C(127)-C(128) | 1.395(7)  |
| C(127)-C(133) | 1.524(9)  |
| C(128)-H(128) | 0.9500    |
| C(129)-C(131) | 1.503(14) |
| C(129)-C(130) | 1.514(12) |

|               |           |
|---------------|-----------|
| C(129)-C(132) | 1.592(13) |
| C(130)-H(13A) | 0.9800    |
| C(130)-H(13B) | 0.9800    |
| C(130)-H(13C) | 0.9800    |
| C(131)-H(13D) | 0.9800    |
| C(131)-H(13E) | 0.9800    |
| C(131)-H(13F) | 0.9800    |
| C(132)-H(13G) | 0.9800    |
| C(132)-H(13H) | 0.9800    |
| C(132)-H(13I) | 0.9800    |
| C(133)-C(134) | 1.494(10) |
| C(133)-C(135) | 1.533(13) |
| C(133)-C(136) | 1.581(12) |
| C(134)-H(13J) | 0.9800    |
| C(134)-H(13K) | 0.9800    |
| C(134)-H(13L) | 0.9800    |
| C(135)-H(13M) | 0.9800    |
| C(135)-H(13O) | 0.9800    |
| C(135)-H(13P) | 0.9800    |
| C(136)-H(13Q) | 0.9800    |
| C(136)-H(13R) | 0.9800    |
| C(136)-H(13S) | 0.9800    |
| C(137)-C(138) | 1.393(7)  |
| C(137)-C(142) | 1.397(7)  |
| C(138)-C(139) | 1.390(7)  |
| C(139)-C(140) | 1.386(8)  |
| C(139)-H(139) | 0.9500    |
| C(140)-C(141) | 1.382(8)  |
| C(140)-H(140) | 0.9500    |
| C(141)-C(142) | 1.388(7)  |
| C(141)-H(141) | 0.9500    |
| C(143)-C(144) | 1.477(8)  |
| C(144)-C(145) | 1.527(8)  |
| C(144)-C(146) | 1.529(9)  |
| C(144)-H(144) | 1.0000    |
| C(145)-C(146) | 1.480(9)  |

|               |           |
|---------------|-----------|
| C(145)-H(14A) | 0.9900    |
| C(145)-H(14B) | 0.9900    |
| C(146)-C(148) | 1.485(10) |
| C(146)-C(147) | 1.504(10) |
| C(147)-H(14C) | 0.9800    |
| C(147)-H(14D) | 0.9800    |
| C(147)-H(14E) | 0.9800    |
| C(148)-H(14F) | 0.9800    |
| C(148)-H(14G) | 0.9800    |
| C(148)-H(14H) | 0.9800    |
| C(149)-C(150) | 1.479(8)  |
| C(150)-C(151) | 1.510(8)  |
| C(150)-C(152) | 1.534(7)  |
| C(150)-H(150) | 1.0000    |
| C(151)-C(152) | 1.504(8)  |
| C(151)-H(15A) | 0.9900    |
| C(151)-H(15B) | 0.9900    |
| C(152)-C(153) | 1.503(8)  |
| C(152)-C(154) | 1.515(8)  |
| C(153)-H(15C) | 0.9800    |
| C(153)-H(15D) | 0.9800    |
| C(153)-H(15E) | 0.9800    |
| C(154)-H(15F) | 0.9800    |
| C(154)-H(15G) | 0.9800    |
| C(154)-H(15H) | 0.9800    |
| C(155)-C(156) | 1.378(7)  |
| C(155)-C(160) | 1.393(7)  |
| C(156)-C(157) | 1.395(6)  |
| C(156)-H(156) | 0.9500    |
| C(157)-C(158) | 1.395(7)  |
| C(157)-C(161) | 1.514(8)  |
| C(158)-C(159) | 1.390(7)  |
| C(158)-H(158) | 0.9500    |
| C(159)-C(160) | 1.395(7)  |
| C(159)-C(165) | 1.537(7)  |
| C(160)-H(160) | 0.9500    |



|                  |            |
|------------------|------------|
| C(161)-C(162)    | 1.503(13)  |
| C(161)-C(164)    | 1.524(12)  |
| C(161)-C(163)    | 1.552(13)  |
| C(162)-H(16A)    | 0.9800     |
| C(162)-H(16B)    | 0.9800     |
| C(162)-H(16C)    | 0.9800     |
| C(163)-H(16D)    | 0.9800     |
| C(163)-H(16E)    | 0.9800     |
| C(163)-H(16F)    | 0.9800     |
| C(164)-H(16G)    | 0.9800     |
| C(164)-H(16H)    | 0.9800     |
| C(164)-H(16I)    | 0.9800     |
| C(165)-C(168)    | 1.516(8)   |
| C(165)-C(166)    | 1.535(8)   |
| C(165)-C(167)    | 1.541(8)   |
| C(166)-H(16J)    | 0.9800     |
| C(166)-H(16K)    | 0.9800     |
| C(166)-H(16L)    | 0.9800     |
| C(167)-H(16M)    | 0.9800     |
| C(167)-H(16O)    | 0.9800     |
| C(167)-H(16P)    | 0.9800     |
| C(168)-H(16Q)    | 0.9800     |
| C(168)-H(16R)    | 0.9800     |
| C(168)-H(16S)    | 0.9800     |
| C(1S)-Cl(1S)     | 1.54(4)    |
| C(1S)-Cl(2S)     | 1.71(4)    |
| C(1S)-Cl(3S)     | 1.78(4)    |
| C(1S)-H(1S)      | 1.0000     |
|                  |            |
| N(1)-Fe(1)-N(2)  | 86.67(15)  |
| N(1)-Fe(1)-N(4)  | 87.17(15)  |
| N(2)-Fe(1)-N(4)  | 157.20(16) |
| N(1)-Fe(1)-N(3)  | 148.95(15) |
| N(2)-Fe(1)-N(3)  | 87.08(15)  |
| N(4)-Fe(1)-N(3)  | 86.94(15)  |
| N(1)-Fe(1)-Cl(1) | 106.48(12) |

|                  |            |
|------------------|------------|
| N(2)-Fe(1)-Cl(1) | 103.34(12) |
| N(4)-Fe(1)-Cl(1) | 99.46(12)  |
| N(3)-Fe(1)-Cl(1) | 104.56(11) |
| C(2)-N(1)-C(5)   | 105.4(4)   |
| C(2)-N(1)-Fe(1)  | 124.4(3)   |
| C(5)-N(1)-Fe(1)  | 128.9(3)   |
| C(7)-N(2)-C(10)  | 105.9(4)   |
| C(7)-N(2)-Fe(1)  | 128.0(3)   |
| C(10)-N(2)-Fe(1) | 123.7(3)   |
| C(12)-N(3)-C(15) | 105.8(4)   |
| C(12)-N(3)-Fe(1) | 124.4(3)   |
| C(15)-N(3)-Fe(1) | 127.9(3)   |
| C(17)-N(4)-C(20) | 106.2(4)   |
| C(17)-N(4)-Fe(1) | 127.8(3)   |
| C(20)-N(4)-Fe(1) | 122.9(3)   |
| C(27)-N(5)-C(22) | 127.4(5)   |
| C(27)-N(5)-H(5N) | 116.3      |
| C(22)-N(5)-H(5N) | 116.3      |
| C(33)-N(6)-C(26) | 126.1(4)   |
| C(33)-N(6)-H(6N) | 117.0      |
| C(26)-N(6)-H(6N) | 117.0      |
| C(59)-N(7)-C(54) | 129.4(4)   |
| C(59)-N(7)-H(7N) | 115.3      |
| C(54)-N(7)-H(7N) | 115.3      |
| C(65)-N(8)-C(58) | 123.5(4)   |
| C(65)-N(8)-H(8N) | 118.2      |
| C(58)-N(8)-H(8N) | 118.2      |
| C(20)-C(1)-C(2)  | 123.8(4)   |
| C(20)-C(1)-C(21) | 117.3(4)   |
| C(2)-C(1)-C(21)  | 118.9(4)   |
| N(1)-C(2)-C(1)   | 125.6(4)   |
| N(1)-C(2)-C(3)   | 109.9(4)   |
| C(1)-C(2)-C(3)   | 124.5(4)   |
| C(4)-C(3)-C(2)   | 107.7(4)   |
| C(4)-C(3)-H(3)   | 126.2      |
| C(2)-C(3)-H(3)   | 126.2      |

|                   |          |
|-------------------|----------|
| C(3)-C(4)-C(5)    | 107.1(4) |
| C(3)-C(4)-H(4)    | 126.4    |
| C(5)-C(4)-H(4)    | 126.4    |
| C(6)-C(5)-N(1)    | 124.7(4) |
| C(6)-C(5)-C(4)    | 125.2(4) |
| N(1)-C(5)-C(4)    | 109.7(4) |
| C(5)-C(6)-C(7)    | 124.2(4) |
| C(5)-C(6)-C(39)   | 117.8(4) |
| C(7)-C(6)-C(39)   | 118.0(4) |
| N(2)-C(7)-C(6)    | 124.7(4) |
| N(2)-C(7)-C(8)    | 109.6(4) |
| C(6)-C(7)-C(8)    | 125.7(4) |
| C(9)-C(8)-C(7)    | 107.7(4) |
| C(9)-C(8)-H(8)    | 126.2    |
| C(7)-C(8)-H(8)    | 126.2    |
| C(8)-C(9)-C(10)   | 106.7(4) |
| C(8)-C(9)-H(9)    | 126.6    |
| C(10)-C(9)-H(9)   | 126.6    |
| N(2)-C(10)-C(11)  | 125.0(4) |
| N(2)-C(10)-C(9)   | 110.1(4) |
| C(11)-C(10)-C(9)  | 124.7(4) |
| C(12)-C(11)-C(10) | 124.3(4) |
| C(12)-C(11)-C(53) | 119.3(4) |
| C(10)-C(11)-C(53) | 116.4(4) |
| N(3)-C(12)-C(11)  | 125.5(4) |
| N(3)-C(12)-C(13)  | 109.9(4) |
| C(11)-C(12)-C(13) | 124.5(4) |
| C(14)-C(13)-C(12) | 107.4(4) |
| C(14)-C(13)-H(13) | 126.3    |
| C(12)-C(13)-H(13) | 126.3    |
| C(13)-C(14)-C(15) | 106.7(4) |
| C(13)-C(14)-H(14) | 126.7    |
| C(15)-C(14)-H(14) | 126.7    |
| N(3)-C(15)-C(16)  | 125.6(4) |
| N(3)-C(15)-C(14)  | 110.2(4) |
| C(16)-C(15)-C(14) | 123.7(4) |

|                   |          |
|-------------------|----------|
| C(17)-C(16)-C(15) | 124.1(4) |
| C(17)-C(16)-C(71) | 117.9(4) |
| C(15)-C(16)-C(71) | 117.9(4) |
| N(4)-C(17)-C(16)  | 124.9(4) |
| N(4)-C(17)-C(18)  | 110.3(4) |
| C(16)-C(17)-C(18) | 124.8(4) |
| C(19)-C(18)-C(17) | 106.4(4) |
| C(19)-C(18)-H(18) | 126.8    |
| C(17)-C(18)-H(18) | 126.8    |
| C(18)-C(19)-C(20) | 106.9(4) |
| C(18)-C(19)-H(19) | 126.5    |
| C(20)-C(19)-H(19) | 126.5    |
| N(4)-C(20)-C(1)   | 124.9(4) |
| N(4)-C(20)-C(19)  | 109.9(4) |
| C(1)-C(20)-C(19)  | 124.9(4) |
| C(22)-C(21)-C(26) | 118.9(5) |
| C(22)-C(21)-C(1)  | 119.7(5) |
| C(26)-C(21)-C(1)  | 121.5(5) |
| C(21)-C(22)-C(23) | 120.5(5) |
| C(21)-C(22)-N(5)  | 119.0(5) |
| C(23)-C(22)-N(5)  | 120.5(5) |
| C(24)-C(23)-C(22) | 118.8(5) |
| C(24)-C(23)-H(23) | 120.6    |
| C(22)-C(23)-H(23) | 120.6    |
| C(23)-C(24)-C(25) | 122.0(5) |
| C(23)-C(24)-H(24) | 119.0    |
| C(25)-C(24)-H(24) | 119.0    |
| C(26)-C(25)-C(24) | 119.0(5) |
| C(26)-C(25)-H(25) | 120.5    |
| C(24)-C(25)-H(25) | 120.5    |
| C(25)-C(26)-C(21) | 120.7(5) |
| C(25)-C(26)-N(6)  | 121.0(5) |
| C(21)-C(26)-N(6)  | 118.2(4) |
| O(1)-C(27)-N(5)   | 123.0(8) |
| O(1)-C(27)-C(28)  | 123.8(8) |
| N(5)-C(27)-C(28)  | 113.2(6) |

|                     |          |
|---------------------|----------|
| C(27)-C(28)-C(29)   | 118.4(7) |
| C(27)-C(28)-C(30)   | 117.6(7) |
| C(29)-C(28)-C(30)   | 58.8(5)  |
| C(27)-C(28)-H(28)   | 116.5    |
| C(29)-C(28)-H(28)   | 116.5    |
| C(30)-C(28)-H(28)   | 116.5    |
| C(28)-C(29)-C(30)   | 63.0(5)  |
| C(28)-C(29)-H(29A)  | 117.5    |
| C(30)-C(29)-H(29A)  | 117.5    |
| C(28)-C(29)-H(29B)  | 117.5    |
| C(30)-C(29)-H(29B)  | 117.5    |
| H(29A)-C(29)-H(29B) | 114.5    |
| C(31)-C(30)-C(32)   | 115.1(7) |
| C(31)-C(30)-C(29)   | 118.6(7) |
| C(32)-C(30)-C(29)   | 119.0(7) |
| C(31)-C(30)-C(28)   | 114.1(7) |
| C(32)-C(30)-C(28)   | 120.1(6) |
| C(29)-C(30)-C(28)   | 58.2(5)  |
| C(30)-C(31)-H(31A)  | 109.5    |
| C(30)-C(31)-H(31B)  | 109.5    |
| H(31A)-C(31)-H(31B) | 109.5    |
| C(30)-C(31)-H(31C)  | 109.5    |
| H(31A)-C(31)-H(31C) | 109.5    |
| H(31B)-C(31)-H(31C) | 109.5    |
| C(30)-C(32)-H(32A)  | 109.5    |
| C(30)-C(32)-H(32B)  | 109.5    |
| H(32A)-C(32)-H(32B) | 109.5    |
| C(30)-C(32)-H(32C)  | 109.5    |
| H(32A)-C(32)-H(32C) | 109.5    |
| H(32B)-C(32)-H(32C) | 109.5    |
| O(2)-C(33)-N(6)     | 122.3(5) |
| O(2)-C(33)-C(34)    | 124.8(5) |
| N(6)-C(33)-C(34)    | 112.8(5) |
| C(33)-C(34)-C(35)   | 120.1(5) |
| C(33)-C(34)-C(36)   | 120.6(5) |
| C(35)-C(34)-C(36)   | 58.2(4)  |

|                     |          |
|---------------------|----------|
| C(33)-C(34)-H(34)   | 115.3    |
| C(35)-C(34)-H(34)   | 115.3    |
| C(36)-C(34)-H(34)   | 115.3    |
| C(36)-C(35)-C(34)   | 61.6(4)  |
| C(36)-C(35)-H(35A)  | 117.6    |
| C(34)-C(35)-H(35A)  | 117.6    |
| C(36)-C(35)-H(35B)  | 117.6    |
| C(34)-C(35)-H(35B)  | 117.6    |
| H(35A)-C(35)-H(35B) | 114.7    |
| C(35)-C(36)-C(38)   | 118.6(6) |
| C(35)-C(36)-C(37)   | 118.0(6) |
| C(38)-C(36)-C(37)   | 114.6(6) |
| C(35)-C(36)-C(34)   | 60.2(4)  |
| C(38)-C(36)-C(34)   | 114.9(5) |
| C(37)-C(36)-C(34)   | 119.9(5) |
| C(36)-C(37)-H(37A)  | 109.5    |
| C(36)-C(37)-H(37B)  | 109.5    |
| H(37A)-C(37)-H(37B) | 109.5    |
| C(36)-C(37)-H(37C)  | 109.5    |
| H(37A)-C(37)-H(37C) | 109.5    |
| H(37B)-C(37)-H(37C) | 109.5    |
| C(36)-C(38)-H(38A)  | 109.5    |
| C(36)-C(38)-H(38B)  | 109.5    |
| H(38A)-C(38)-H(38B) | 109.5    |
| C(36)-C(38)-H(38C)  | 109.5    |
| H(38A)-C(38)-H(38C) | 109.5    |
| H(38B)-C(38)-H(38C) | 109.5    |
| C(44)-C(39)-C(40)   | 119.6(5) |
| C(44)-C(39)-C(6)    | 120.5(5) |
| C(40)-C(39)-C(6)    | 119.9(4) |
| C(39)-C(40)-C(41)   | 121.7(5) |
| C(39)-C(40)-H(40)   | 119.1    |
| C(41)-C(40)-H(40)   | 119.1    |
| C(42)-C(41)-C(40)   | 116.6(5) |
| C(42)-C(41)-C(45)   | 121.8(5) |
| C(40)-C(41)-C(45)   | 121.6(5) |

|                     |           |
|---------------------|-----------|
| C(43)-C(42)-C(41)   | 123.9(5)  |
| C(43)-C(42)-H(42)   | 118.0     |
| C(41)-C(42)-H(42)   | 118.0     |
| C(42)-C(43)-C(44)   | 117.1(5)  |
| C(42)-C(43)-C(49)   | 121.1(5)  |
| C(44)-C(43)-C(49)   | 121.8(5)  |
| C(39)-C(44)-C(43)   | 121.0(5)  |
| C(39)-C(44)-H(44)   | 119.5     |
| C(43)-C(44)-H(44)   | 119.5     |
| C(46)-C(45)-C(41)   | 112.6(8)  |
| C(46)-C(45)-C(47)   | 110.7(12) |
| C(41)-C(45)-C(47)   | 107.2(8)  |
| C(46)-C(45)-C(48)   | 108.1(12) |
| C(41)-C(45)-C(48)   | 110.6(8)  |
| C(47)-C(45)-C(48)   | 107.5(13) |
| C(45)-C(46)-H(46A)  | 109.5     |
| C(45)-C(46)-H(46B)  | 109.5     |
| H(46A)-C(46)-H(46B) | 109.5     |
| C(45)-C(46)-H(46C)  | 109.5     |
| H(46A)-C(46)-H(46C) | 109.5     |
| H(46B)-C(46)-H(46C) | 109.5     |
| C(45)-C(47)-H(47A)  | 109.5     |
| C(45)-C(47)-H(47B)  | 109.5     |
| H(47A)-C(47)-H(47B) | 109.5     |
| C(45)-C(47)-H(47C)  | 109.5     |
| H(47A)-C(47)-H(47C) | 109.5     |
| H(47B)-C(47)-H(47C) | 109.5     |
| C(45)-C(48)-H(48A)  | 109.5     |
| C(45)-C(48)-H(48B)  | 109.5     |
| H(48A)-C(48)-H(48B) | 109.5     |
| C(45)-C(48)-H(48C)  | 109.5     |
| H(48A)-C(48)-H(48C) | 109.5     |
| H(48B)-C(48)-H(48C) | 109.5     |
| C(50)-C(49)-C(51)   | 118.6(13) |
| C(50)-C(49)-C(43)   | 119.1(12) |
| C(51)-C(49)-C(43)   | 111.5(9)  |

|                     |           |
|---------------------|-----------|
| C(50)-C(49)-C(52)   | 97.6(13)  |
| C(51)-C(49)-C(52)   | 101.1(11) |
| C(43)-C(49)-C(52)   | 104.7(7)  |
| C(49)-C(50)-H(50A)  | 109.5     |
| C(49)-C(50)-H(50B)  | 109.5     |
| H(50A)-C(50)-H(50B) | 109.5     |
| C(49)-C(50)-H(50C)  | 109.5     |
| H(50A)-C(50)-H(50C) | 109.5     |
| H(50B)-C(50)-H(50C) | 109.5     |
| C(49)-C(51)-H(51A)  | 109.5     |
| C(49)-C(51)-H(51B)  | 109.5     |
| H(51A)-C(51)-H(51B) | 109.5     |
| C(49)-C(51)-H(51C)  | 109.5     |
| H(51A)-C(51)-H(51C) | 109.5     |
| H(51B)-C(51)-H(51C) | 109.5     |
| C(49)-C(52)-H(52A)  | 109.5     |
| C(49)-C(52)-H(52B)  | 109.5     |
| H(52A)-C(52)-H(52B) | 109.5     |
| C(49)-C(52)-H(52C)  | 109.5     |
| H(52A)-C(52)-H(52C) | 109.5     |
| H(52B)-C(52)-H(52C) | 109.5     |
| C(58)-C(53)-C(54)   | 119.4(4)  |
| C(58)-C(53)-C(11)   | 119.2(4)  |
| C(54)-C(53)-C(11)   | 121.3(4)  |
| C(55)-C(54)-C(53)   | 119.8(5)  |
| C(55)-C(54)-N(7)    | 123.3(4)  |
| C(53)-C(54)-N(7)    | 116.8(4)  |
| C(56)-C(55)-C(54)   | 119.5(5)  |
| C(56)-C(55)-H(55)   | 120.2     |
| C(54)-C(55)-H(55)   | 120.2     |
| C(55)-C(56)-C(57)   | 122.0(5)  |
| C(55)-C(56)-H(56)   | 119.0     |
| C(57)-C(56)-H(56)   | 119.0     |
| C(56)-C(57)-C(58)   | 118.2(5)  |
| C(56)-C(57)-H(57)   | 120.9     |
| C(58)-C(57)-H(57)   | 120.9     |



|                     |          |
|---------------------|----------|
| C(53)-C(58)-C(57)   | 120.9(4) |
| C(53)-C(58)-N(8)    | 119.6(4) |
| C(57)-C(58)-N(8)    | 119.5(4) |
| O(3)-C(59)-N(7)     | 123.1(5) |
| O(3)-C(59)-C(60)    | 124.8(5) |
| N(7)-C(59)-C(60)    | 112.1(4) |
| C(59)-C(60)-C(61)   | 119.3(5) |
| C(59)-C(60)-C(62)   | 121.8(5) |
| C(61)-C(60)-C(62)   | 57.8(4)  |
| C(59)-C(60)-H(60)   | 115.3    |
| C(61)-C(60)-H(60)   | 115.3    |
| C(62)-C(60)-H(60)   | 115.3    |
| C(62)-C(61)-C(60)   | 61.5(4)  |
| C(62)-C(61)-H(61A)  | 117.6    |
| C(60)-C(61)-H(61A)  | 117.6    |
| C(62)-C(61)-H(61B)  | 117.6    |
| C(60)-C(61)-H(61B)  | 117.6    |
| H(61A)-C(61)-H(61B) | 114.7    |
| C(61)-C(62)-C(64)   | 119.3(6) |
| C(61)-C(62)-C(63)   | 117.6(6) |
| C(64)-C(62)-C(63)   | 114.3(6) |
| C(61)-C(62)-C(60)   | 60.6(4)  |
| C(64)-C(62)-C(60)   | 119.7(5) |
| C(63)-C(62)-C(60)   | 115.0(5) |
| C(62)-C(63)-H(63A)  | 109.5    |
| C(62)-C(63)-H(63B)  | 109.5    |
| H(63A)-C(63)-H(63B) | 109.5    |
| C(62)-C(63)-H(63C)  | 109.5    |
| H(63A)-C(63)-H(63C) | 109.5    |
| H(63B)-C(63)-H(63C) | 109.5    |
| C(62)-C(64)-H(64A)  | 109.5    |
| C(62)-C(64)-H(64B)  | 109.5    |
| H(64A)-C(64)-H(64B) | 109.5    |
| C(62)-C(64)-H(64C)  | 109.5    |
| H(64A)-C(64)-H(64C) | 109.5    |
| H(64B)-C(64)-H(64C) | 109.5    |

|                     |          |
|---------------------|----------|
| O(4)-C(65)-N(8)     | 121.4(5) |
| O(4)-C(65)-C(66)    | 123.9(5) |
| N(8)-C(65)-C(66)    | 114.6(4) |
| C(65)-C(66)-C(67)   | 118.5(5) |
| C(65)-C(66)-C(68)   | 121.4(5) |
| C(67)-C(66)-C(68)   | 58.1(4)  |
| C(65)-C(66)-H(66)   | 115.6    |
| C(67)-C(66)-H(66)   | 115.6    |
| C(68)-C(66)-H(66)   | 115.6    |
| C(68)-C(67)-C(66)   | 61.9(4)  |
| C(68)-C(67)-H(67A)  | 117.6    |
| C(66)-C(67)-H(67A)  | 117.6    |
| C(68)-C(67)-H(67B)  | 117.6    |
| C(66)-C(67)-H(67B)  | 117.6    |
| H(67A)-C(67)-H(67B) | 114.7    |
| C(67)-C(68)-C(69)   | 119.5(6) |
| C(67)-C(68)-C(70)   | 115.8(6) |
| C(69)-C(68)-C(70)   | 115.5(6) |
| C(67)-C(68)-C(66)   | 60.0(4)  |
| C(69)-C(68)-C(66)   | 120.6(5) |
| C(70)-C(68)-C(66)   | 114.2(6) |
| C(68)-C(69)-H(69A)  | 109.5    |
| C(68)-C(69)-H(69B)  | 109.5    |
| H(69A)-C(69)-H(69B) | 109.5    |
| C(68)-C(69)-H(69C)  | 109.5    |
| H(69A)-C(69)-H(69C) | 109.5    |
| H(69B)-C(69)-H(69C) | 109.5    |
| C(68)-C(70)-H(70A)  | 109.5    |
| C(68)-C(70)-H(70B)  | 109.5    |
| H(70A)-C(70)-H(70B) | 109.5    |
| C(68)-C(70)-H(70C)  | 109.5    |
| H(70A)-C(70)-H(70C) | 109.5    |
| H(70B)-C(70)-H(70C) | 109.5    |
| C(76)-C(71)-C(72)   | 120.4(4) |
| C(76)-C(71)-C(16)   | 118.5(4) |
| C(72)-C(71)-C(16)   | 121.0(4) |

|                     |          |
|---------------------|----------|
| C(71)-C(72)-C(73)   | 120.2(5) |
| C(71)-C(72)-H(72)   | 119.9    |
| C(73)-C(72)-H(72)   | 119.9    |
| C(74)-C(73)-C(72)   | 118.2(4) |
| C(74)-C(73)-C(77)   | 123.0(4) |
| C(72)-C(73)-C(77)   | 118.8(4) |
| C(73)-C(74)-C(75)   | 122.7(4) |
| C(73)-C(74)-H(74)   | 118.6    |
| C(75)-C(74)-H(74)   | 118.6    |
| C(76)-C(75)-C(74)   | 117.6(4) |
| C(76)-C(75)-C(81)   | 120.1(4) |
| C(74)-C(75)-C(81)   | 122.2(4) |
| C(71)-C(76)-C(75)   | 120.8(4) |
| C(71)-C(76)-H(76)   | 119.6    |
| C(75)-C(76)-H(76)   | 119.6    |
| C(78)-C(77)-C(80)   | 108.3(4) |
| C(78)-C(77)-C(73)   | 109.2(4) |
| C(80)-C(77)-C(73)   | 111.8(4) |
| C(78)-C(77)-C(79)   | 109.8(5) |
| C(80)-C(77)-C(79)   | 108.0(4) |
| C(73)-C(77)-C(79)   | 109.6(4) |
| C(77)-C(78)-H(78A)  | 109.5    |
| C(77)-C(78)-H(78B)  | 109.5    |
| H(78A)-C(78)-H(78B) | 109.5    |
| C(77)-C(78)-H(78C)  | 109.5    |
| H(78A)-C(78)-H(78C) | 109.5    |
| H(78B)-C(78)-H(78C) | 109.5    |
| C(77)-C(79)-H(79A)  | 109.5    |
| C(77)-C(79)-H(79B)  | 109.5    |
| H(79A)-C(79)-H(79B) | 109.5    |
| C(77)-C(79)-H(79C)  | 109.5    |
| H(79A)-C(79)-H(79C) | 109.5    |
| H(79B)-C(79)-H(79C) | 109.5    |
| C(77)-C(80)-H(80A)  | 109.5    |
| C(77)-C(80)-H(80B)  | 109.5    |
| H(80A)-C(80)-H(80B) | 109.5    |

|                     |            |
|---------------------|------------|
| C(77)-C(80)-H(80C)  | 109.5      |
| H(80A)-C(80)-H(80C) | 109.5      |
| H(80B)-C(80)-H(80C) | 109.5      |
| C(75)-C(81)-C(82)   | 110.0(5)   |
| C(75)-C(81)-C(83)   | 111.3(4)   |
| C(82)-C(81)-C(83)   | 109.6(5)   |
| C(75)-C(81)-C(84)   | 110.2(4)   |
| C(82)-C(81)-C(84)   | 108.5(5)   |
| C(83)-C(81)-C(84)   | 107.3(4)   |
| C(81)-C(82)-H(82A)  | 109.5      |
| C(81)-C(82)-H(82B)  | 109.5      |
| H(82A)-C(82)-H(82B) | 109.5      |
| C(81)-C(82)-H(82C)  | 109.5      |
| H(82A)-C(82)-H(82C) | 109.5      |
| H(82B)-C(82)-H(82C) | 109.5      |
| C(81)-C(83)-H(83A)  | 109.5      |
| C(81)-C(83)-H(83B)  | 109.5      |
| H(83A)-C(83)-H(83B) | 109.5      |
| C(81)-C(83)-H(83C)  | 109.5      |
| H(83A)-C(83)-H(83C) | 109.5      |
| H(83B)-C(83)-H(83C) | 109.5      |
| C(81)-C(84)-H(84A)  | 109.5      |
| C(81)-C(84)-H(84B)  | 109.5      |
| H(84A)-C(84)-H(84B) | 109.5      |
| C(81)-C(84)-H(84C)  | 109.5      |
| H(84A)-C(84)-H(84C) | 109.5      |
| H(84B)-C(84)-H(84C) | 109.5      |
| N(9)-Fe(2)-N(11)    | 150.07(16) |
| N(9)-Fe(2)-N(10)    | 86.78(16)  |
| N(11)-Fe(2)-N(10)   | 87.57(15)  |
| N(9)-Fe(2)-N(12)    | 87.41(15)  |
| N(11)-Fe(2)-N(12)   | 86.40(15)  |
| N(10)-Fe(2)-N(12)   | 156.94(16) |
| N(9)-Fe(2)-Cl(2)    | 105.19(12) |
| N(11)-Fe(2)-Cl(2)   | 104.73(12) |
| N(10)-Fe(2)-Cl(2)   | 100.46(12) |

|                     |            |
|---------------------|------------|
| N(12)-Fe(2)-Cl(2)   | 102.60(12) |
| C(86)-N(9)-C(89)    | 105.9(4)   |
| C(86)-N(9)-Fe(2)    | 123.9(3)   |
| C(89)-N(9)-Fe(2)    | 128.8(3)   |
| C(94)-N(10)-C(91)   | 106.7(4)   |
| C(94)-N(10)-Fe(2)   | 123.0(3)   |
| C(91)-N(10)-Fe(2)   | 127.9(3)   |
| C(96)-N(11)-C(99)   | 105.4(4)   |
| C(96)-N(11)-Fe(2)   | 124.4(3)   |
| C(99)-N(11)-Fe(2)   | 128.3(3)   |
| C(104)-N(12)-C(101) | 105.9(4)   |
| C(104)-N(12)-Fe(2)  | 123.0(3)   |
| C(101)-N(12)-Fe(2)  | 128.3(3)   |
| C(111)-N(13)-C(106) | 127.1(5)   |
| C(111)-N(13)-H(13N) | 116.5      |
| C(106)-N(13)-H(13N) | 116.5      |
| C(117)-N(14)-C(110) | 126.2(4)   |
| C(117)-N(14)-H(14N) | 116.9      |
| C(110)-N(14)-H(14N) | 116.9      |
| C(149)-N(15)-C(142) | 127.5(5)   |
| C(149)-N(15)-H(15N) | 116.3      |
| C(142)-N(15)-H(15N) | 116.3      |
| C(143)-N(16)-C(138) | 125.6(4)   |
| C(143)-N(16)-H(16N) | 117.2      |
| C(138)-N(16)-H(16N) | 117.2      |
| C(86)-C(85)-C(104)  | 123.7(5)   |
| C(86)-C(85)-C(105)  | 119.1(4)   |
| C(104)-C(85)-C(105) | 117.2(4)   |
| N(9)-C(86)-C(85)    | 126.3(4)   |
| N(9)-C(86)-C(87)    | 110.0(4)   |
| C(85)-C(86)-C(87)   | 123.6(5)   |
| C(88)-C(87)-C(86)   | 107.0(5)   |
| C(88)-C(87)-H(87)   | 126.5      |
| C(86)-C(87)-H(87)   | 126.5      |
| C(87)-C(88)-C(89)   | 107.4(5)   |
| C(87)-C(88)-H(88)   | 126.3      |

|                      |          |
|----------------------|----------|
| C(89)-C(88)-H(88)    | 126.3    |
| C(90)-C(89)-N(9)     | 125.1(4) |
| C(90)-C(89)-C(88)    | 125.1(4) |
| N(9)-C(89)-C(88)     | 109.4(4) |
| C(89)-C(90)-C(91)    | 124.0(4) |
| C(89)-C(90)-C(123)   | 117.9(4) |
| C(91)-C(90)-C(123)   | 118.1(4) |
| N(10)-C(91)-C(90)    | 124.7(4) |
| N(10)-C(91)-C(92)    | 109.1(4) |
| C(90)-C(91)-C(92)    | 126.1(4) |
| C(93)-C(92)-C(91)    | 108.0(4) |
| C(93)-C(92)-H(92)    | 126.0    |
| C(91)-C(92)-H(92)    | 126.0    |
| C(92)-C(93)-C(94)    | 106.6(5) |
| C(92)-C(93)-H(93)    | 126.7    |
| C(94)-C(93)-H(93)    | 126.7    |
| N(10)-C(94)-C(95)    | 126.1(4) |
| N(10)-C(94)-C(93)    | 109.6(4) |
| C(95)-C(94)-C(93)    | 124.1(5) |
| C(94)-C(95)-C(96)    | 124.5(5) |
| C(94)-C(95)-C(137)   | 117.9(4) |
| C(96)-C(95)-C(137)   | 117.5(4) |
| N(11)-C(96)-C(95)    | 124.7(4) |
| N(11)-C(96)-C(97)    | 109.9(4) |
| C(95)-C(96)-C(97)    | 125.4(4) |
| C(98)-C(97)-C(96)    | 107.4(4) |
| C(98)-C(97)-H(97)    | 126.3    |
| C(96)-C(97)-H(97)    | 126.3    |
| C(97)-C(98)-C(99)    | 107.3(4) |
| C(97)-C(98)-H(98)    | 126.3    |
| C(99)-C(98)-H(98)    | 126.3    |
| N(11)-C(99)-C(100)   | 125.5(4) |
| N(11)-C(99)-C(98)    | 109.9(4) |
| C(100)-C(99)-C(98)   | 124.2(4) |
| C(101)-C(100)-C(99)  | 124.3(4) |
| C(101)-C(100)-C(155) | 117.6(4) |

|                      |           |
|----------------------|-----------|
| C(99)-C(100)-C(155)  | 117.9(4)  |
| N(12)-C(101)-C(100)  | 124.7(4)  |
| N(12)-C(101)-C(102)  | 110.4(4)  |
| C(100)-C(101)-C(102) | 124.9(4)  |
| C(103)-C(102)-C(101) | 106.5(4)  |
| C(103)-C(102)-H(102) | 126.7     |
| C(101)-C(102)-H(102) | 126.7     |
| C(102)-C(103)-C(104) | 106.5(5)  |
| C(102)-C(103)-H(103) | 126.7     |
| C(104)-C(103)-H(103) | 126.7     |
| N(12)-C(104)-C(85)   | 124.8(4)  |
| N(12)-C(104)-C(103)  | 110.5(4)  |
| C(85)-C(104)-C(103)  | 124.5(5)  |
| C(110)-C(105)-C(106) | 119.2(5)  |
| C(110)-C(105)-C(85)  | 122.0(5)  |
| C(106)-C(105)-C(85)  | 118.8(5)  |
| C(107)-C(106)-C(105) | 120.2(5)  |
| C(107)-C(106)-N(13)  | 121.2(5)  |
| C(105)-C(106)-N(13)  | 118.6(5)  |
| C(108)-C(107)-C(106) | 119.1(6)  |
| C(108)-C(107)-H(107) | 120.5     |
| C(106)-C(107)-H(107) | 120.5     |
| C(107)-C(108)-C(109) | 121.9(5)  |
| C(107)-C(108)-H(108) | 119.1     |
| C(109)-C(108)-H(108) | 119.1     |
| C(110)-C(109)-C(108) | 119.1(6)  |
| C(110)-C(109)-H(109) | 120.4     |
| C(108)-C(109)-H(109) | 120.4     |
| C(109)-C(110)-C(105) | 120.5(5)  |
| C(109)-C(110)-N(14)  | 121.4(5)  |
| C(105)-C(110)-N(14)  | 118.1(5)  |
| O(5)-C(111)-N(13)    | 122.8(12) |
| O(5)-C(111)-C(112)   | 120.8(12) |
| N(13)-C(111)-C(112)  | 113.9(6)  |
| C(111)-C(112)-C(113) | 119.2(6)  |
| C(111)-C(112)-C(114) | 118.4(7)  |

|                      |           |
|----------------------|-----------|
| C(113)-C(112)-C(114) | 57.6(5)   |
| C(111)-C(112)-H(112) | 116.3     |
| C(113)-C(112)-H(112) | 116.3     |
| C(114)-C(112)-H(112) | 116.3     |
| C(114)-C(113)-C(112) | 61.7(5)   |
| C(114)-C(113)-H(11A) | 117.6     |
| C(112)-C(113)-H(11A) | 117.6     |
| C(114)-C(113)-H(11B) | 117.6     |
| C(112)-C(113)-H(11B) | 117.6     |
| H(11A)-C(113)-H(11B) | 114.7     |
| C(113)-C(114)-C(115) | 127.4(13) |
| C(113)-C(114)-C(112) | 60.7(5)   |
| C(115)-C(114)-C(112) | 119.8(10) |
| C(113)-C(114)-C(116) | 117.1(10) |
| C(115)-C(114)-C(116) | 107.7(13) |
| C(112)-C(114)-C(116) | 117.6(9)  |
| C(114)-C(115)-H(11C) | 109.5     |
| C(114)-C(115)-H(11D) | 109.5     |
| H(11C)-C(115)-H(11D) | 109.5     |
| C(114)-C(115)-H(11E) | 109.5     |
| H(11C)-C(115)-H(11E) | 109.5     |
| H(11D)-C(115)-H(11E) | 109.5     |
| C(114)-C(116)-H(11F) | 109.5     |
| C(114)-C(116)-H(11G) | 109.5     |
| H(11F)-C(116)-H(11G) | 109.5     |
| C(114)-C(116)-H(11H) | 109.5     |
| H(11F)-C(116)-H(11H) | 109.5     |
| H(11G)-C(116)-H(11H) | 109.5     |
| O(6)-C(117)-N(14)    | 120.7(12) |
| O(6)-C(117)-C(118)   | 125.1(12) |
| N(14)-C(117)-C(118)  | 113.8(5)  |
| C(117)-C(118)-C(119) | 120.9(5)  |
| C(117)-C(118)-C(120) | 120.2(5)  |
| C(119)-C(118)-C(120) | 58.8(4)   |
| C(117)-C(118)-H(118) | 115.1     |
| C(119)-C(118)-H(118) | 115.1     |



|                      |          |
|----------------------|----------|
| C(120)-C(118)-H(118) | 115.1    |
| C(120)-C(119)-C(118) | 61.8(4)  |
| C(120)-C(119)-H(11I) | 117.6    |
| C(118)-C(119)-H(11I) | 117.6    |
| C(120)-C(119)-H(11J) | 117.6    |
| C(118)-C(119)-H(11J) | 117.6    |
| H(11I)-C(119)-H(11J) | 114.7    |
| C(119)-C(120)-C(121) | 117.6(7) |
| C(119)-C(120)-C(122) | 118.2(6) |
| C(121)-C(120)-C(122) | 115.8(7) |
| C(119)-C(120)-C(118) | 59.4(4)  |
| C(121)-C(120)-C(118) | 119.0(6) |
| C(122)-C(120)-C(118) | 115.3(6) |
| C(120)-C(121)-H(12A) | 109.5    |
| C(120)-C(121)-H(12B) | 109.5    |
| H(12A)-C(121)-H(12B) | 109.5    |
| C(120)-C(121)-H(12C) | 109.5    |
| H(12A)-C(121)-H(12C) | 109.5    |
| H(12B)-C(121)-H(12C) | 109.5    |
| C(120)-C(122)-H(12D) | 109.5    |
| C(120)-C(122)-H(12E) | 109.5    |
| H(12D)-C(122)-H(12E) | 109.5    |
| C(120)-C(122)-H(12F) | 109.5    |
| H(12D)-C(122)-H(12F) | 109.5    |
| H(12E)-C(122)-H(12F) | 109.5    |
| C(124)-C(123)-C(128) | 118.9(5) |
| C(124)-C(123)-C(90)  | 119.3(5) |
| C(128)-C(123)-C(90)  | 121.7(5) |
| C(123)-C(124)-C(125) | 122.0(5) |
| C(123)-C(124)-H(124) | 119.0    |
| C(125)-C(124)-H(124) | 119.0    |
| C(126)-C(125)-C(124) | 116.6(5) |
| C(126)-C(125)-C(129) | 123.4(5) |
| C(124)-C(125)-C(129) | 119.9(6) |
| C(125)-C(126)-C(127) | 123.7(5) |
| C(125)-C(126)-H(126) | 118.2    |

|                      |          |
|----------------------|----------|
| C(127)-C(126)-H(126) | 118.2    |
| C(126)-C(127)-C(128) | 117.3(5) |
| C(126)-C(127)-C(133) | 122.6(5) |
| C(128)-C(127)-C(133) | 120.0(6) |
| C(123)-C(128)-C(127) | 121.5(5) |
| C(123)-C(128)-H(128) | 119.3    |
| C(127)-C(128)-H(128) | 119.3    |
| C(131)-C(129)-C(130) | 114.7(9) |
| C(131)-C(129)-C(125) | 106.6(7) |
| C(130)-C(129)-C(125) | 115.1(7) |
| C(131)-C(129)-C(132) | 103.9(8) |
| C(130)-C(129)-C(132) | 108.1(8) |
| C(125)-C(129)-C(132) | 107.6(7) |
| C(129)-C(130)-H(13A) | 109.5    |
| C(129)-C(130)-H(13B) | 109.5    |
| H(13A)-C(130)-H(13B) | 109.5    |
| C(129)-C(130)-H(13C) | 109.5    |
| H(13A)-C(130)-H(13C) | 109.5    |
| H(13B)-C(130)-H(13C) | 109.5    |
| C(129)-C(131)-H(13D) | 109.5    |
| C(129)-C(131)-H(13E) | 109.5    |
| H(13D)-C(131)-H(13E) | 109.5    |
| C(129)-C(131)-H(13F) | 109.5    |
| H(13D)-C(131)-H(13F) | 109.5    |
| H(13E)-C(131)-H(13F) | 109.5    |
| C(129)-C(132)-H(13G) | 109.5    |
| C(129)-C(132)-H(13H) | 109.5    |
| H(13G)-C(132)-H(13H) | 109.5    |
| C(129)-C(132)-H(13I) | 109.5    |
| H(13G)-C(132)-H(13I) | 109.5    |
| H(13H)-C(132)-H(13I) | 109.5    |
| C(134)-C(133)-C(127) | 114.2(7) |
| C(134)-C(133)-C(135) | 113.0(9) |
| C(127)-C(133)-C(135) | 110.5(6) |
| C(134)-C(133)-C(136) | 105.1(8) |
| C(127)-C(133)-C(136) | 108.8(6) |

|                      |          |
|----------------------|----------|
| C(135)-C(133)-C(136) | 104.5(8) |
| C(133)-C(134)-H(13J) | 109.5    |
| C(133)-C(134)-H(13K) | 109.5    |
| H(13J)-C(134)-H(13K) | 109.5    |
| C(133)-C(134)-H(13L) | 109.5    |
| H(13J)-C(134)-H(13L) | 109.5    |
| H(13K)-C(134)-H(13L) | 109.5    |
| C(133)-C(135)-H(13M) | 109.5    |
| C(133)-C(135)-H(13O) | 109.5    |
| H(13M)-C(135)-H(13O) | 109.5    |
| C(133)-C(135)-H(13P) | 109.5    |
| H(13M)-C(135)-H(13P) | 109.5    |
| H(13O)-C(135)-H(13P) | 109.5    |
| C(133)-C(136)-H(13Q) | 109.5    |
| C(133)-C(136)-H(13R) | 109.5    |
| H(13Q)-C(136)-H(13R) | 109.5    |
| C(133)-C(136)-H(13S) | 109.5    |
| H(13Q)-C(136)-H(13S) | 109.5    |
| H(13R)-C(136)-H(13S) | 109.5    |
| C(138)-C(137)-C(142) | 119.1(5) |
| C(138)-C(137)-C(95)  | 119.5(5) |
| C(142)-C(137)-C(95)  | 121.4(5) |
| C(139)-C(138)-C(137) | 120.9(5) |
| C(139)-C(138)-N(16)  | 119.6(5) |
| C(137)-C(138)-N(16)  | 119.5(4) |
| C(140)-C(139)-C(138) | 118.6(5) |
| C(140)-C(139)-H(139) | 120.7    |
| C(138)-C(139)-H(139) | 120.7    |
| C(141)-C(140)-C(139) | 121.8(5) |
| C(141)-C(140)-H(140) | 119.1    |
| C(139)-C(140)-H(140) | 119.1    |
| C(140)-C(141)-C(142) | 119.0(5) |
| C(140)-C(141)-H(141) | 120.5    |
| C(142)-C(141)-H(141) | 120.5    |
| C(141)-C(142)-C(137) | 120.6(5) |
| C(141)-C(142)-N(15)  | 121.5(5) |

|                      |          |
|----------------------|----------|
| C(137)-C(142)-N(15)  | 117.9(5) |
| O(8)-C(143)-N(16)    | 121.4(6) |
| O(8)-C(143)-C(144)   | 124.1(5) |
| N(16)-C(143)-C(144)  | 114.5(5) |
| C(143)-C(144)-C(145) | 118.3(5) |
| C(143)-C(144)-C(146) | 121.5(5) |
| C(145)-C(144)-C(146) | 57.9(4)  |
| C(143)-C(144)-H(144) | 115.6    |
| C(145)-C(144)-H(144) | 115.6    |
| C(146)-C(144)-H(144) | 115.6    |
| C(146)-C(145)-C(144) | 61.1(4)  |
| C(146)-C(145)-H(14A) | 117.7    |
| C(144)-C(145)-H(14A) | 117.7    |
| C(146)-C(145)-H(14B) | 117.7    |
| C(144)-C(145)-H(14B) | 117.7    |
| H(14A)-C(145)-H(14B) | 114.8    |
| C(145)-C(146)-C(148) | 118.5(6) |
| C(145)-C(146)-C(147) | 117.6(7) |
| C(148)-C(146)-C(147) | 115.4(7) |
| C(145)-C(146)-C(144) | 61.0(4)  |
| C(148)-C(146)-C(144) | 118.6(6) |
| C(147)-C(146)-C(144) | 114.8(6) |
| C(146)-C(147)-H(14C) | 109.5    |
| C(146)-C(147)-H(14D) | 109.5    |
| H(14C)-C(147)-H(14D) | 109.5    |
| C(146)-C(147)-H(14E) | 109.5    |
| H(14C)-C(147)-H(14E) | 109.5    |
| H(14D)-C(147)-H(14E) | 109.5    |
| C(146)-C(148)-H(14F) | 109.5    |
| C(146)-C(148)-H(14G) | 109.5    |
| H(14F)-C(148)-H(14G) | 109.5    |
| C(146)-C(148)-H(14H) | 109.5    |
| H(14F)-C(148)-H(14H) | 109.5    |
| H(14G)-C(148)-H(14H) | 109.5    |
| O(7)-C(149)-N(15)    | 123.1(5) |
| O(7)-C(149)-C(150)   | 123.6(5) |

|                      |          |
|----------------------|----------|
| N(15)-C(149)-C(150)  | 113.3(5) |
| C(149)-C(150)-C(151) | 119.8(5) |
| C(149)-C(150)-C(152) | 119.9(5) |
| C(151)-C(150)-C(152) | 59.2(4)  |
| C(149)-C(150)-H(150) | 115.5    |
| C(151)-C(150)-H(150) | 115.5    |
| C(152)-C(150)-H(150) | 115.5    |
| C(152)-C(151)-C(150) | 61.2(4)  |
| C(152)-C(151)-H(15A) | 117.6    |
| C(150)-C(151)-H(15A) | 117.6    |
| C(152)-C(151)-H(15B) | 117.6    |
| C(150)-C(151)-H(15B) | 117.6    |
| H(15A)-C(151)-H(15B) | 114.8    |
| C(153)-C(152)-C(151) | 119.6(5) |
| C(153)-C(152)-C(154) | 114.2(5) |
| C(151)-C(152)-C(154) | 117.6(5) |
| C(153)-C(152)-C(150) | 119.5(5) |
| C(151)-C(152)-C(150) | 59.6(4)  |
| C(154)-C(152)-C(150) | 115.6(5) |
| C(152)-C(153)-H(15C) | 109.5    |
| C(152)-C(153)-H(15D) | 109.5    |
| H(15C)-C(153)-H(15D) | 109.5    |
| C(152)-C(153)-H(15E) | 109.5    |
| H(15C)-C(153)-H(15E) | 109.5    |
| H(15D)-C(153)-H(15E) | 109.5    |
| C(152)-C(154)-H(15F) | 109.5    |
| C(152)-C(154)-H(15G) | 109.5    |
| H(15F)-C(154)-H(15G) | 109.5    |
| C(152)-C(154)-H(15H) | 109.5    |
| H(15F)-C(154)-H(15H) | 109.5    |
| H(15G)-C(154)-H(15H) | 109.5    |
| C(156)-C(155)-C(160) | 120.0(4) |
| C(156)-C(155)-C(100) | 119.5(4) |
| C(160)-C(155)-C(100) | 120.5(4) |
| C(155)-C(156)-C(157) | 121.7(5) |
| C(155)-C(156)-H(156) | 119.2    |

|                      |           |
|----------------------|-----------|
| C(157)-C(156)-H(156) | 119.2     |
| C(158)-C(157)-C(156) | 117.1(5)  |
| C(158)-C(157)-C(161) | 123.4(4)  |
| C(156)-C(157)-C(161) | 119.5(5)  |
| C(159)-C(158)-C(157) | 122.9(4)  |
| C(159)-C(158)-H(158) | 118.6     |
| C(157)-C(158)-H(158) | 118.6     |
| C(158)-C(159)-C(160) | 118.2(5)  |
| C(158)-C(159)-C(165) | 122.7(4)  |
| C(160)-C(159)-C(165) | 119.1(4)  |
| C(155)-C(160)-C(159) | 120.3(5)  |
| C(155)-C(160)-H(160) | 119.9     |
| C(159)-C(160)-H(160) | 119.9     |
| C(162)-C(161)-C(157) | 112.5(11) |
| C(162)-C(161)-C(164) | 109.6(15) |
| C(157)-C(161)-C(164) | 112(2)    |
| C(162)-C(161)-C(163) | 111.0(9)  |
| C(157)-C(161)-C(163) | 105.0(12) |
| C(164)-C(161)-C(163) | 106.3(12) |
| C(161)-C(162)-H(16A) | 109.5     |
| C(161)-C(162)-H(16B) | 109.5     |
| H(16A)-C(162)-H(16B) | 109.5     |
| C(161)-C(162)-H(16C) | 109.5     |
| H(16A)-C(162)-H(16C) | 109.5     |
| H(16B)-C(162)-H(16C) | 109.5     |
| C(161)-C(163)-H(16D) | 109.5     |
| C(161)-C(163)-H(16E) | 109.5     |
| H(16D)-C(163)-H(16E) | 109.5     |
| C(161)-C(163)-H(16F) | 109.5     |
| H(16D)-C(163)-H(16F) | 109.5     |
| H(16E)-C(163)-H(16F) | 109.5     |
| C(161)-C(164)-H(16G) | 109.5     |
| C(161)-C(164)-H(16H) | 109.5     |
| H(16G)-C(164)-H(16H) | 109.5     |
| C(161)-C(164)-H(16I) | 109.5     |
| H(16G)-C(164)-H(16I) | 109.5     |

|                      |          |
|----------------------|----------|
| H(16H)-C(164)-H(16I) | 109.5    |
| C(168)-C(165)-C(166) | 110.4(5) |
| C(168)-C(165)-C(159) | 110.5(4) |
| C(166)-C(165)-C(159) | 107.4(5) |
| C(168)-C(165)-C(167) | 108.5(5) |
| C(166)-C(165)-C(167) | 109.1(5) |
| C(159)-C(165)-C(167) | 111.0(5) |
| C(165)-C(166)-H(16J) | 109.5    |
| C(165)-C(166)-H(16K) | 109.5    |
| H(16J)-C(166)-H(16K) | 109.5    |
| C(165)-C(166)-H(16L) | 109.5    |
| H(16J)-C(166)-H(16L) | 109.5    |
| H(16K)-C(166)-H(16L) | 109.5    |
| C(165)-C(167)-H(16M) | 109.5    |
| C(165)-C(167)-H(16O) | 109.5    |
| H(16M)-C(167)-H(16O) | 109.5    |
| C(165)-C(167)-H(16P) | 109.5    |
| H(16M)-C(167)-H(16P) | 109.5    |
| H(16O)-C(167)-H(16P) | 109.5    |
| C(165)-C(168)-H(16Q) | 109.5    |
| C(165)-C(168)-H(16R) | 109.5    |
| H(16Q)-C(168)-H(16R) | 109.5    |
| C(165)-C(168)-H(16S) | 109.5    |
| H(16Q)-C(168)-H(16S) | 109.5    |
| H(16R)-C(168)-H(16S) | 109.5    |
| Cl(1S)-C(1S)-Cl(2S)  | 115(2)   |
| Cl(1S)-C(1S)-Cl(3S)  | 116(2)   |
| Cl(2S)-C(1S)-Cl(3S)  | 111(2)   |
| Cl(1S)-C(1S)-H(1S)   | 104.8    |
| Cl(2S)-C(1S)-H(1S)   | 104.8    |
| Cl(3S)-C(1S)-H(1S)   | 104.8    |

---

Symmetry transformations used to generate equivalent atoms:

**Table S4. Anisotropic displacement parameters ( $\text{\AA}^2 \times 10^3$ ) for C84H96ClFeN8O4 ([Fe(P2)Cl])**The anisotropic displacement factor exponent takes the form:  $-2\pi^2 [h^2 a^{*2} U^{11} + \dots + 2 h k a^* b^* U^{12}]$ 

|       | U <sup>11</sup> | U <sup>22</sup> | U <sup>33</sup> | U <sup>23</sup> | U <sup>13</sup> | U <sup>12</sup> |
|-------|-----------------|-----------------|-----------------|-----------------|-----------------|-----------------|
| Fe(1) | 26(1)           | 25(1)           | 37(1)           | 1(1)            | -2(1)           | 12(1)           |
| Cl(1) | 60(1)           | 58(1)           | 40(1)           | -3(1)           | 5(1)            | 35(1)           |
| O(1)  | 46(4)           | 163(7)          | 47(4)           | -2(5)           | 9(3)            | 32(5)           |
| O(1X) | 40(13)          | 141(9)          | 40(20)          | 13(11)          | 23(14)          | 18(9)           |
| O(2)  | 59(3)           | 102(4)          | 48(2)           | -2(2)           | -6(2)           | 52(3)           |
| O(3)  | 40(2)           | 55(2)           | 95(4)           | -30(2)          | 11(2)           | 13(2)           |
| O(4)  | 42(2)           | 37(2)           | 71(3)           | 5(2)            | 10(2)           | 21(2)           |
| N(1)  | 29(2)           | 28(2)           | 39(2)           | 1(2)            | 0(2)            | 14(2)           |
| N(2)  | 31(2)           | 28(2)           | 35(2)           | 2(2)            | 1(2)            | 13(2)           |
| N(3)  | 26(2)           | 29(2)           | 34(2)           | -1(2)           | 0(2)            | 13(2)           |
| N(4)  | 26(2)           | 21(2)           | 43(2)           | 2(2)            | -1(2)           | 9(2)            |
| N(5)  | 38(2)           | 59(3)           | 49(3)           | 0(2)            | -3(2)           | 23(2)           |
| N(6)  | 28(2)           | 38(2)           | 49(3)           | 4(2)            | -4(2)           | 13(2)           |
| N(7)  | 30(2)           | 33(2)           | 49(3)           | -8(2)           | -1(2)           | 11(2)           |
| N(8)  | 31(2)           | 33(2)           | 42(2)           | 1(2)            | 6(2)            | 12(2)           |
| C(1)  | 32(2)           | 32(2)           | 42(3)           | -2(2)           | -2(2)           | 16(2)           |
| C(2)  | 29(2)           | 33(2)           | 42(3)           | 0(2)            | -2(2)           | 17(2)           |
| C(3)  | 29(2)           | 33(2)           | 49(3)           | 2(2)            | -9(2)           | 15(2)           |
| C(4)  | 37(3)           | 37(3)           | 44(3)           | 1(2)            | -5(2)           | 19(2)           |
| C(5)  | 32(2)           | 35(2)           | 37(3)           | 0(2)            | 0(2)            | 22(2)           |
| C(6)  | 33(2)           | 32(2)           | 35(3)           | 0(2)            | 2(2)            | 18(2)           |
| C(7)  | 33(2)           | 28(2)           | 37(3)           | 2(2)            | 3(2)            | 17(2)           |
| C(8)  | 39(3)           | 31(2)           | 44(3)           | 2(2)            | 4(2)            | 18(2)           |
| C(9)  | 30(2)           | 30(2)           | 47(3)           | -1(2)           | 2(2)            | 13(2)           |
| C(10) | 31(2)           | 27(2)           | 38(3)           | -2(2)           | 2(2)            | 13(2)           |
| C(11) | 29(2)           | 30(2)           | 37(3)           | -2(2)           | 2(2)            | 14(2)           |
| C(12) | 26(2)           | 34(2)           | 36(3)           | -4(2)           | 0(2)            | 15(2)           |
| C(13) | 29(2)           | 34(2)           | 44(3)           | -1(2)           | -2(2)           | 15(2)           |
| C(14) | 33(2)           | 35(2)           | 40(3)           | 2(2)            | 1(2)            | 18(2)           |
| C(15) | 31(2)           | 32(2)           | 35(3)           | 0(2)            | 2(2)            | 19(2)           |
| C(16) | 35(2)           | 31(2)           | 37(3)           | 0(2)            | 1(2)            | 18(2)           |



|       |         |         |         |        |         |        |
|-------|---------|---------|---------|--------|---------|--------|
| C(17) | 36(2)   | 27(2)   | 36(3)   | 2(2)   | 0(2)    | 16(2)  |
| C(18) | 32(2)   | 32(2)   | 43(3)   | 1(2)   | -4(2)   | 14(2)  |
| C(19) | 33(2)   | 30(2)   | 49(3)   | 1(2)   | -4(2)   | 12(2)  |
| C(20) | 31(2)   | 28(2)   | 37(3)   | -2(2)  | -2(2)   | 11(2)  |
| C(21) | 32(2)   | 37(3)   | 43(3)   | 8(2)   | -2(2)   | 17(2)  |
| C(22) | 34(3)   | 49(3)   | 44(3)   | 7(2)   | -3(2)   | 21(2)  |
| C(23) | 35(3)   | 72(4)   | 48(3)   | 14(3)  | 4(2)    | 24(3)  |
| C(24) | 26(3)   | 68(4)   | 54(3)   | 17(3)  | -3(2)   | 11(3)  |
| C(25) | 36(3)   | 45(3)   | 52(3)   | 9(2)   | -6(2)   | 12(2)  |
| C(26) | 34(2)   | 36(3)   | 49(3)   | 8(2)   | -3(2)   | 17(2)  |
| C(27) | 44(3)   | 105(5)  | 47(3)   | -8(3)  | -1(3)   | 39(3)  |
| C(28) | 62(4)   | 97(5)   | 51(4)   | -16(3) | -8(3)   | 43(4)  |
| C(29) | 89(5)   | 150(8)  | 46(4)   | -17(4) | -5(4)   | 70(6)  |
| C(30) | 63(4)   | 108(5)  | 45(4)   | -5(3)  | -2(3)   | 45(4)  |
| C(31) | 70(5)   | 125(7)  | 76(5)   | -7(5)  | -10(4)  | 51(5)  |
| C(32) | 84(5)   | 110(6)  | 67(5)   | 12(4)  | 4(4)    | 40(5)  |
| C(33) | 41(3)   | 41(3)   | 50(3)   | -1(2)  | -1(2)   | 23(2)  |
| C(34) | 48(3)   | 49(3)   | 53(3)   | 6(2)   | 4(2)    | 30(3)  |
| C(35) | 74(4)   | 64(4)   | 51(3)   | -3(3)  | 3(3)    | 44(3)  |
| C(36) | 67(4)   | 53(3)   | 50(3)   | 6(3)   | 3(3)    | 34(3)  |
| C(37) | 110(6)  | 64(4)   | 57(4)   | 7(3)   | 4(4)    | 59(4)  |
| C(38) | 70(4)   | 87(5)   | 80(5)   | 37(4)  | 23(4)   | 33(4)  |
| C(39) | 34(2)   | 32(2)   | 40(3)   | 4(2)   | 2(2)    | 17(2)  |
| C(40) | 39(3)   | 38(3)   | 40(3)   | 2(2)   | 1(2)    | 21(2)  |
| C(41) | 51(3)   | 47(3)   | 42(3)   | 8(2)   | 1(2)    | 25(3)  |
| C(42) | 70(4)   | 46(3)   | 54(3)   | 13(3)  | -6(3)   | 30(3)  |
| C(43) | 68(4)   | 42(3)   | 53(3)   | 4(2)   | -7(3)   | 33(3)  |
| C(44) | 47(3)   | 40(3)   | 43(3)   | 1(2)   | -2(2)   | 24(2)  |
| C(45) | 84(5)   | 69(4)   | 42(3)   | 9(3)   | -2(3)   | 42(4)  |
| C(46) | 59(12)  | 98(13)  | 33(8)   | -3(8)  | -1(9)   | 47(12) |
| C(47) | 85(10)  | 104(17) | 35(9)   | -5(10) | -2(8)   | 57(11) |
| C(48) | 112(14) | 83(11)  | 25(8)   | 22(7)  | 22(8)   | 44(11) |
| C(49) | 117(6)  | 54(4)   | 87(5)   | -9(3)  | -27(4)  | 59(4)  |
| C(50) | 108(16) | 65(13)  | 121(17) | -4(10) | -33(12) | 61(13) |
| C(51) | 83(11)  | 33(8)   | 99(15)  | -3(8)  | -21(9)  | 32(8)  |
| C(52) | 81(10)  | 54(9)   | 113(13) | -20(8) | -11(8)  | 48(8)  |

|        |         |         |         |         |         |         |
|--------|---------|---------|---------|---------|---------|---------|
| C(50X) | 144(16) | 113(19) | 133(19) | -27(14) | -27(14) | 110(16) |
| C(51X) | 142(13) | 28(6)   | 93(10)  | 0(6)    | 10(9)   | 29(7)   |
| C(52X) | 88(11)  | 44(9)   | 74(8)   | -6(6)   | 6(7)    | 38(8)   |
| C(53)  | 33(2)   | 28(2)   | 38(3)   | 1(2)    | 0(2)    | 13(2)   |
| C(54)  | 32(2)   | 29(2)   | 45(3)   | -1(2)   | 2(2)    | 13(2)   |
| C(55)  | 32(3)   | 39(3)   | 54(3)   | -9(2)   | 3(2)    | 13(2)   |
| C(56)  | 28(2)   | 41(3)   | 62(3)   | -13(3)  | -3(2)   | 10(2)   |
| C(57)  | 34(3)   | 38(3)   | 46(3)   | -9(2)   | -1(2)   | 11(2)   |
| C(58)  | 33(2)   | 31(2)   | 41(3)   | 2(2)    | 4(2)    | 15(2)   |
| C(59)  | 36(3)   | 34(3)   | 54(3)   | -7(2)   | 3(2)    | 15(2)   |
| C(60)  | 41(3)   | 45(3)   | 57(3)   | -13(3)  | -1(2)   | 19(2)   |
| C(61)  | 72(4)   | 60(4)   | 57(4)   | -10(3)  | 9(3)    | 36(3)   |
| C(62)  | 57(3)   | 45(3)   | 65(4)   | -15(3)  | -7(3)   | 31(3)   |
| C(63)  | 85(5)   | 48(4)   | 96(6)   | -22(4)  | -11(4)  | 33(4)   |
| C(64)  | 76(5)   | 85(5)   | 103(6)  | -30(4)  | -22(4)  | 55(4)   |
| C(65)  | 35(3)   | 41(3)   | 44(3)   | 1(2)    | 0(2)    | 17(2)   |
| C(66)  | 40(3)   | 41(3)   | 52(3)   | -2(2)   | 4(2)    | 20(2)   |
| C(67)  | 42(3)   | 50(3)   | 50(3)   | -5(2)   | 2(2)    | 22(3)   |
| C(68)  | 44(3)   | 63(4)   | 59(4)   | -14(3)  | -4(3)   | 29(3)   |
| C(69)  | 74(5)   | 139(7)  | 51(4)   | -10(4)  | -7(3)   | 72(5)   |
| C(70)  | 34(3)   | 71(4)   | 130(7)  | -35(4)  | -4(4)   | 23(3)   |
| C(71)  | 26(2)   | 28(2)   | 38(3)   | 0(2)    | -2(2)   | 11(2)   |
| C(72)  | 31(2)   | 35(2)   | 38(3)   | 1(2)    | 1(2)    | 15(2)   |
| C(73)  | 31(2)   | 34(2)   | 38(3)   | -2(2)   | -4(2)   | 16(2)   |
| C(74)  | 35(3)   | 31(2)   | 41(3)   | 3(2)    | -2(2)   | 18(2)   |
| C(75)  | 31(2)   | 29(2)   | 42(3)   | 3(2)    | 0(2)    | 14(2)   |
| C(76)  | 33(2)   | 31(2)   | 39(3)   | -4(2)   | -1(2)   | 15(2)   |
| C(77)  | 43(3)   | 39(3)   | 42(3)   | -1(2)   | 1(2)    | 24(2)   |
| C(78)  | 57(3)   | 48(3)   | 47(3)   | -6(2)   | -3(3)   | 32(3)   |
| C(79)  | 44(3)   | 55(3)   | 64(4)   | -1(3)   | 7(3)    | 30(3)   |
| C(80)  | 54(3)   | 46(3)   | 55(3)   | -1(2)   | 1(3)    | 34(3)   |
| C(81)  | 50(3)   | 40(3)   | 43(3)   | 7(2)    | 6(2)    | 26(2)   |
| C(82)  | 94(5)   | 50(3)   | 38(3)   | -3(2)   | -7(3)   | 40(3)   |
| C(83)  | 46(3)   | 45(3)   | 50(3)   | 14(2)   | 11(2)   | 24(3)   |
| C(84)  | 77(4)   | 62(4)   | 76(5)   | 32(3)   | 40(4)   | 48(4)   |
| Fe(2)  | 33(1)   | 28(1)   | 38(1)   | -3(1)   | 1(1)    | 18(1)   |

|        |       |         |        |        |       |       |
|--------|-------|---------|--------|--------|-------|-------|
| Cl(2)  | 66(1) | 50(1)   | 44(1)  | 2(1)   | -7(1) | 35(1) |
| O(5)   | 67(6) | 118(11) | 58(6)  | -18(7) | 0(5)  | 28(6) |
| O(6)   | 51(7) | 97(12)  | 52(6)  | 4(9)   | 5(6)  | 47(8) |
| O(5X)  | 47(7) | 105(13) | 39(9)  | -7(8)  | 4(6)  | 15(7) |
| O(6X)  | 50(8) | 99(13)  | 35(8)  | 6(9)   | 5(7)  | 50(9) |
| O(7)   | 41(2) | 59(3)   | 90(3)  | 9(2)   | 3(2)  | 27(2) |
| O(8)   | 63(3) | 29(2)   | 101(4) | -2(2)  | 1(2)  | 20(2) |
| N(9)   | 35(2) | 32(2)   | 42(2)  | -4(2)  | -2(2) | 19(2) |
| N(10)  | 40(2) | 32(2)   | 36(2)  | -4(2)  | -3(2) | 21(2) |
| N(11)  | 33(2) | 29(2)   | 35(2)  | -5(2)  | -1(2) | 17(2) |
| N(12)  | 32(2) | 28(2)   | 40(2)  | -5(2)  | 0(2)  | 17(2) |
| N(13)  | 41(2) | 60(3)   | 49(3)  | -6(2)  | -2(2) | 25(2) |
| N(14)  | 37(2) | 44(2)   | 50(3)  | -4(2)  | 3(2)  | 25(2) |
| N(15)  | 40(2) | 40(2)   | 46(3)  | -2(2)  | 2(2)  | 21(2) |
| N(16)  | 49(2) | 28(2)   | 46(3)  | -4(2)  | -2(2) | 14(2) |
| C(85)  | 38(3) | 39(3)   | 45(3)  | -1(2)  | 0(2)  | 24(2) |
| C(86)  | 35(2) | 39(3)   | 46(3)  | -2(2)  | 0(2)  | 24(2) |
| C(87)  | 36(3) | 48(3)   | 49(3)  | -6(2)  | 5(2)  | 24(2) |
| C(88)  | 41(3) | 46(3)   | 52(3)  | -3(2)  | 3(2)  | 26(2) |
| C(89)  | 41(3) | 40(3)   | 38(3)  | -5(2)  | -1(2) | 27(2) |
| C(90)  | 45(3) | 41(3)   | 36(3)  | -3(2)  | -4(2) | 28(2) |
| C(91)  | 45(3) | 35(2)   | 38(3)  | -5(2)  | -4(2) | 26(2) |
| C(92)  | 45(3) | 38(3)   | 44(3)  | -8(2)  | -6(2) | 25(2) |
| C(93)  | 41(3) | 34(3)   | 47(3)  | -6(2)  | -4(2) | 18(2) |
| C(94)  | 38(3) | 29(2)   | 41(3)  | -2(2)  | -3(2) | 17(2) |
| C(95)  | 39(3) | 33(2)   | 35(3)  | -1(2)  | -1(2) | 19(2) |
| C(96)  | 33(2) | 32(2)   | 39(3)  | 1(2)   | 0(2)  | 17(2) |
| C(97)  | 31(2) | 37(3)   | 46(3)  | -4(2)  | 1(2)  | 17(2) |
| C(98)  | 39(3) | 35(2)   | 44(3)  | -4(2)  | -3(2) | 23(2) |
| C(99)  | 40(3) | 33(2)   | 37(3)  | -2(2)  | -1(2) | 22(2) |
| C(100) | 43(3) | 34(2)   | 37(3)  | -3(2)  | 2(2)  | 24(2) |
| C(101) | 39(2) | 34(2)   | 37(3)  | -2(2)  | 1(2)  | 22(2) |
| C(102) | 41(3) | 37(3)   | 52(3)  | -6(2)  | 4(2)  | 21(2) |
| C(103) | 38(3) | 37(3)   | 56(3)  | -5(2)  | 7(2)  | 15(2) |
| C(104) | 41(3) | 31(2)   | 43(3)  | 1(2)   | 3(2)  | 20(2) |
| C(105) | 39(3) | 42(3)   | 47(3)  | -9(2)  | 3(2)  | 26(2) |

|        |         |        |         |        |        |        |
|--------|---------|--------|---------|--------|--------|--------|
| C(106) | 43(3)   | 54(3)  | 46(3)   | -12(2) | -1(2)  | 28(3)  |
| C(107) | 47(3)   | 79(4)  | 46(3)   | -16(3) | -4(2)  | 35(3)  |
| C(108) | 34(3)   | 77(4)  | 58(4)   | -22(3) | -1(2)  | 21(3)  |
| C(109) | 39(3)   | 56(3)  | 57(3)   | -16(3) | 4(2)   | 20(3)  |
| C(110) | 38(3)   | 48(3)  | 50(3)   | -9(2)  | 1(2)   | 26(2)  |
| C(111) | 48(3)   | 80(4)  | 53(3)   | 6(3)   | -1(3)  | 32(3)  |
| C(112) | 52(4)   | 99(5)  | 54(4)   | 0(3)   | -3(3)  | 32(4)  |
| C(113) | 78(5)   | 140(8) | 54(4)   | 26(5)  | 2(4)   | 45(5)  |
| C(114) | 78(5)   | 130(7) | 51(4)   | -12(4) | 0(4)   | 53(5)  |
| C(115) | 71(7)   | 98(14) | 66(8)   | -2(7)  | 18(6)  | 37(7)  |
| C(116) | 103(12) | 102(9) | 55(8)   | -21(7) | 20(8)  | 14(10) |
| C(117) | 49(3)   | 61(4)  | 53(3)   | 2(3)   | -1(2)  | 35(3)  |
| C(118) | 47(3)   | 51(3)  | 62(3)   | -1(3)  | -5(3)  | 29(3)  |
| C(119) | 60(4)   | 76(4)  | 63(4)   | 14(3)  | -5(3)  | 37(3)  |
| C(120) | 76(4)   | 59(4)  | 50(4)   | 2(3)   | 1(3)   | 34(3)  |
| C(121) | 194(10) | 81(5)  | 56(5)   | -4(4)  | -6(5)  | 89(6)  |
| C(122) | 67(5)   | 111(7) | 74(5)   | -10(5) | -10(4) | 17(5)  |
| C(123) | 37(3)   | 43(3)  | 41(3)   | -12(2) | -8(2)  | 25(2)  |
| C(124) | 52(3)   | 55(3)  | 43(3)   | -9(2)  | -8(2)  | 37(3)  |
| C(125) | 50(3)   | 70(4)  | 43(3)   | -17(3) | -9(2)  | 39(3)  |
| C(126) | 67(4)   | 67(4)  | 49(3)   | -25(3) | -12(3) | 46(3)  |
| C(127) | 58(3)   | 47(3)  | 57(3)   | -17(3) | -8(3)  | 31(3)  |
| C(128) | 43(3)   | 44(3)  | 43(3)   | -12(2) | -8(2)  | 25(2)  |
| C(129) | 71(4)   | 89(4)  | 43(3)   | -15(3) | -9(3)  | 52(4)  |
| C(130) | 65(3)   | 53(3)  | 54(3)   | 5(3)   | 5(2)   | 34(3)  |
| C(131) | 94(4)   | 68(3)  | 58(3)   | -9(3)  | -6(3)  | 54(3)  |
| C(132) | 56(3)   | 75(3)  | 52(3)   | -6(2)  | -6(2)  | 38(3)  |
| C(630) | 65(3)   | 53(3)  | 54(3)   | 5(3)   | 5(2)   | 34(3)  |
| C(631) | 56(3)   | 75(3)  | 52(3)   | -6(2)  | -6(2)  | 38(3)  |
| C(632) | 94(4)   | 68(3)  | 58(3)   | -9(3)  | -6(3)  | 54(3)  |
| C(133) | 88(5)   | 52(4)  | 81(5)   | -14(3) | -6(4)  | 42(4)  |
| C(134) | 134(11) | 40(5)  | 88(8)   | -12(5) | 35(7)  | 44(6)  |
| C(135) | 106(9)  | 60(6)  | 137(12) | 12(6)  | -18(8) | 55(6)  |
| C(136) | 108(8)  | 52(5)  | 76(7)   | 6(5)   | 25(6)  | 41(6)  |
| C(137) | 38(3)   | 29(2)  | 40(3)   | -5(2)  | 1(2)   | 14(2)  |
| C(138) | 43(3)   | 26(2)  | 42(3)   | -7(2)  | -1(2)  | 12(2)  |

|        |         |        |         |        |        |        |
|--------|---------|--------|---------|--------|--------|--------|
| C(139) | 50(3)   | 35(3)  | 50(3)   | 0(2)   | 6(2)   | 13(2)  |
| C(140) | 47(3)   | 41(3)  | 60(4)   | 1(3)   | 8(3)   | 13(3)  |
| C(141) | 38(3)   | 38(3)  | 60(4)   | -5(2)  | 0(2)   | 13(2)  |
| C(142) | 44(3)   | 35(3)  | 45(3)   | -6(2)  | -1(2)  | 19(2)  |
| C(143) | 59(3)   | 34(3)  | 45(3)   | 3(2)   | 5(2)   | 21(3)  |
| C(144) | 68(4)   | 37(3)  | 57(4)   | -4(2)  | -8(3)  | 28(3)  |
| C(145) | 82(4)   | 62(4)  | 57(4)   | 10(3)  | 0(3)   | 47(4)  |
| C(146) | 57(3)   | 51(3)  | 70(4)   | 16(3)  | 4(3)   | 31(3)  |
| C(147) | 63(4)   | 69(5)  | 181(10) | 41(5)  | 13(5)  | 39(4)  |
| C(148) | 114(6)  | 115(6) | 58(4)   | 7(4)   | 12(4)  | 89(6)  |
| C(149) | 42(3)   | 42(3)  | 50(3)   | -8(2)  | -4(2)  | 21(2)  |
| C(150) | 52(3)   | 50(3)  | 46(3)   | -1(2)  | 0(2)   | 31(3)  |
| C(151) | 65(4)   | 56(4)  | 55(4)   | -4(3)  | -10(3) | 38(3)  |
| C(152) | 48(3)   | 47(3)  | 50(3)   | -3(2)  | -2(2)  | 28(3)  |
| C(153) | 72(4)   | 60(4)  | 58(4)   | -6(3)  | 1(3)   | 44(3)  |
| C(154) | 60(4)   | 56(4)  | 71(4)   | 6(3)   | 4(3)   | 31(3)  |
| C(155) | 28(2)   | 28(2)  | 44(3)   | -4(2)  | 3(2)   | 11(2)  |
| C(156) | 38(3)   | 28(2)  | 45(3)   | -4(2)  | 2(2)   | 18(2)  |
| C(157) | 33(2)   | 30(2)  | 45(3)   | -7(2)  | 1(2)   | 12(2)  |
| C(158) | 31(2)   | 30(2)  | 52(3)   | -9(2)  | -1(2)  | 15(2)  |
| C(159) | 31(2)   | 32(2)  | 48(3)   | -5(2)  | -1(2)  | 16(2)  |
| C(160) | 34(3)   | 36(3)  | 42(3)   | -7(2)  | -2(2)  | 20(2)  |
| C(161) | 68(4)   | 40(3)  | 45(3)   | -5(2)  | 3(3)   | 30(3)  |
| C(162) | 126(9)  | 87(14) | 46(9)   | -14(9) | -19(8) | 84(10) |
| C(163) | 122(10) | 53(6)  | 36(9)   | -2(4)  | 16(8)  | 15(7)  |
| C(164) | 44(8)   | 49(4)  | 49(4)   | -13(4) | -3(7)  | 27(5)  |
| C(662) | 126(9)  | 87(14) | 46(9)   | -14(9) | -19(8) | 84(10) |
| C(663) | 122(10) | 53(6)  | 36(9)   | -2(4)  | 16(8)  | 15(7)  |
| C(664) | 44(8)   | 49(4)  | 49(4)   | -13(4) | -3(7)  | 27(5)  |
| C(165) | 52(3)   | 40(3)  | 48(3)   | -7(2)  | -5(2)  | 31(3)  |
| C(166) | 56(3)   | 75(3)  | 52(3)   | -6(2)  | -6(2)  | 38(3)  |
| C(167) | 94(4)   | 68(3)  | 58(3)   | -9(3)  | -6(3)  | 54(3)  |
| C(168) | 65(3)   | 53(3)  | 54(3)   | 5(3)   | 5(2)   | 34(3)  |

---

**Table S5. Hydrogen coordinates (  $\times 10^4$ ) and isotropic displacement parameters ( $\text{\AA}^2 \times 10^{-3}$ ) for C84H96ClFeN8O4 ([Fe(P2)Cl])**

|        | x    | y     | z    | U(eq) |
|--------|------|-------|------|-------|
| H(5N)  | 5407 | -453  | 5788 | 59    |
| H(6N)  | 5459 | -1300 | 4392 | 48    |
| H(7N)  | 8836 | 880   | 5071 | 47    |
| H(8N)  | 8134 | 1386  | 6311 | 44    |
| H(3)   | 5340 | -263  | 4452 | 45    |
| H(4)   | 5991 | 565   | 4120 | 47    |
| H(8)   | 7875 | 1996  | 4654 | 45    |
| H(9)   | 8519 | 1992  | 5167 | 44    |
| H(13)  | 8703 | 499   | 5926 | 43    |
| H(14)  | 8146 | -448  | 5983 | 43    |
| H(18)  | 6133 | -1710 | 5825 | 44    |
| H(19)  | 5404 | -1592 | 5573 | 47    |
| H(23)  | 4121 | -1309 | 5688 | 64    |
| H(24)  | 3712 | -1794 | 5066 | 66    |
| H(25)  | 4178 | -1796 | 4451 | 57    |
| H(28)  | 5659 | -239  | 6483 | 82    |
| H(29A) | 4901 | -911  | 7147 | 108   |
| H(29B) | 5449 | -372  | 7260 | 108   |
| H(31A) | 6266 | -273  | 6973 | 134   |
| H(31B) | 6201 | -774  | 7220 | 134   |
| H(31C) | 6298 | -712  | 6698 | 134   |
| H(32A) | 4942 | -1619 | 6774 | 136   |
| H(32B) | 5460 | -1563 | 6573 | 136   |
| H(32C) | 5363 | -1625 | 7095 | 136   |
| H(34)  | 5731 | -1291 | 3724 | 57    |
| H(35A) | 5557 | -1428 | 2948 | 71    |
| H(35B) | 5049 | -1347 | 3002 | 71    |
| H(37A) | 5800 | -24   | 3372 | 106   |
| H(37B) | 5467 | -315  | 2945 | 106   |
| H(37C) | 5222 | -489  | 3427 | 106   |

|        |      |      |      |     |
|--------|------|------|------|-----|
| H(38A) | 6479 | -146 | 3341 | 123 |
| H(38B) | 6423 | -704 | 3369 | 123 |
| H(38C) | 6385 | -477 | 2901 | 123 |
| H(40)  | 6864 | 984  | 3684 | 45  |
| H(42)  | 6923 | 2328 | 3432 | 68  |
| H(44)  | 7030 | 1941 | 4685 | 50  |
| H(46A) | 6945 | 1061 | 2537 | 90  |
| H(46B) | 7348 | 1256 | 2937 | 90  |
| H(46C) | 6768 | 803  | 3015 | 90  |
| H(47A) | 6176 | 1584 | 2936 | 106 |
| H(47B) | 6223 | 1262 | 2535 | 106 |
| H(47C) | 6046 | 1004 | 3013 | 106 |
| H(48A) | 7076 | 2274 | 2780 | 113 |
| H(48B) | 7533 | 2145 | 2776 | 113 |
| H(48C) | 7111 | 1932 | 2390 | 113 |
| H(46D) | 7047 | 951  | 3021 | 63  |
| H(46E) | 6438 | 709  | 2966 | 63  |
| H(46F) | 6809 | 955  | 2548 | 63  |
| H(47D) | 6428 | 1469 | 2434 | 129 |
| H(47E) | 6093 | 1312 | 2878 | 129 |
| H(47F) | 6486 | 1905 | 2772 | 129 |
| H(48D) | 7660 | 1863 | 2921 | 127 |
| H(48E) | 7393 | 1797 | 2448 | 127 |
| H(48F) | 7471 | 2253 | 2771 | 127 |
| H(46G) | 7398 | 1363 | 2969 | 146 |
| H(46H) | 7270 | 1508 | 2496 | 146 |
| H(46I) | 7576 | 1949 | 2855 | 146 |
| H(47G) | 6065 | 944  | 3063 | 182 |
| H(47H) | 6318 | 856  | 2630 | 182 |
| H(47I) | 6455 | 729  | 3108 | 182 |
| H(48G) | 6348 | 1812 | 2860 | 120 |
| H(48H) | 6942 | 2229 | 2783 | 120 |
| H(48I) | 6636 | 1788 | 2423 | 120 |
| H(50A) | 6559 | 2749 | 3767 | 134 |
| H(50B) | 6775 | 3220 | 4108 | 134 |
| H(50C) | 7145 | 3204 | 3735 | 134 |

|        |       |      |      |     |
|--------|-------|------|------|-----|
| H(51A) | 7515  | 2774 | 4707 | 105 |
| H(51B) | 7764  | 3221 | 4343 | 105 |
| H(51C) | 7393  | 3236 | 4716 | 105 |
| H(52A) | 6542  | 2315 | 4852 | 114 |
| H(52B) | 6508  | 2820 | 4743 | 114 |
| H(52C) | 6175  | 2304 | 4463 | 114 |
| H(50D) | 6644  | 3093 | 4207 | 165 |
| H(50E) | 6595  | 2767 | 3772 | 165 |
| H(50F) | 6283  | 2480 | 4209 | 165 |
| H(51D) | 7845  | 3170 | 4034 | 140 |
| H(51E) | 7475  | 3119 | 3632 | 140 |
| H(51F) | 7584  | 3522 | 4021 | 140 |
| H(52D) | 7514  | 2807 | 4748 | 100 |
| H(52E) | 7345  | 3235 | 4755 | 100 |
| H(52F) | 6953  | 2663 | 4921 | 100 |
| H(55)  | 10007 | 1901 | 5468 | 53  |
| H(56)  | 10062 | 2453 | 6031 | 56  |
| H(57)  | 9325  | 2371 | 6370 | 51  |
| H(60)  | 8905  | 486  | 4518 | 58  |
| H(61A) | 9379  | 531  | 3867 | 74  |
| H(61B) | 9928  | 966  | 4103 | 74  |
| H(63A) | 9101  | -470 | 4664 | 115 |
| H(63B) | 8771  | -296 | 4368 | 115 |
| H(63C) | 9205  | -385 | 4144 | 115 |
| H(64A) | 9851  | 97   | 4975 | 122 |
| H(64B) | 10222 | 376  | 4563 | 122 |
| H(64C) | 10108 | 706  | 4913 | 122 |
| H(66)  | 7605  | 1629 | 6652 | 53  |
| H(67A) | 7439  | 2309 | 6848 | 57  |
| H(67B) | 7887  | 2708 | 6493 | 57  |
| H(69A) | 7206  | 1927 | 5533 | 119 |
| H(69B) | 7350  | 2484 | 5717 | 119 |
| H(69C) | 7789  | 2333 | 5660 | 119 |
| H(70A) | 6622  | 1382 | 6035 | 120 |
| H(70B) | 6778  | 1370 | 6539 | 120 |
| H(70C) | 6585  | 1758 | 6391 | 120 |



|        |      |       |      |    |
|--------|------|-------|------|----|
| H(72)  | 7503 | -1385 | 5384 | 42 |
| H(74)  | 7246 | -2341 | 6412 | 42 |
| H(76)  | 6866 | -1228 | 6507 | 42 |
| H(78A) | 7329 | -2099 | 4993 | 72 |
| H(78B) | 7477 | -2543 | 4974 | 72 |
| H(78C) | 6970 | -2641 | 5231 | 72 |
| H(79A) | 8403 | -1655 | 5742 | 78 |
| H(79B) | 8349 | -1957 | 5291 | 78 |
| H(79C) | 8221 | -1500 | 5300 | 78 |
| H(80A) | 7826 | -2502 | 6104 | 71 |
| H(80B) | 7270 | -2884 | 5901 | 71 |
| H(80C) | 7777 | -2786 | 5644 | 71 |
| H(82A) | 7063 | -1812 | 7639 | 89 |
| H(82B) | 7505 | -1737 | 7300 | 89 |
| H(82C) | 7313 | -1327 | 7313 | 89 |
| H(83A) | 6474 | -2684 | 7355 | 70 |
| H(83B) | 6342 | -2778 | 6839 | 70 |
| H(83C) | 6901 | -2638 | 7012 | 70 |
| H(84A) | 6191 | -2049 | 7370 | 99 |
| H(84B) | 6435 | -1565 | 7043 | 99 |
| H(84C) | 6061 | -2130 | 6854 | 99 |
| H(13N) | 4573 | 9979  | 5762 | 60 |
| H(14N) | 4692 | 11004 | 4431 | 50 |
| H(15N) | 1164 | 8697  | 4939 | 49 |
| H(16N) | 1948 | 8255  | 6180 | 52 |
| H(87)  | 4735 | 9868  | 4463 | 51 |
| H(88)  | 4079 | 9050  | 4116 | 53 |
| H(92)  | 2152 | 7651  | 4603 | 49 |
| H(93)  | 1506 | 7673  | 5096 | 49 |
| H(97)  | 1363 | 9182  | 5879 | 45 |
| H(98)  | 1933 | 10123 | 5938 | 45 |
| H(102) | 3947 | 11365 | 5778 | 51 |
| H(103) | 4671 | 11236 | 5526 | 55 |
| H(107) | 5875 | 10789 | 5750 | 67 |
| H(108) | 6349 | 11313 | 5167 | 71 |
| H(109) | 5946 | 11413 | 4545 | 63 |

|        |      |       |      |     |
|--------|------|-------|------|-----|
| H(112) | 4275 | 9675  | 6439 | 85  |
| H(11A) | 4422 | 9726  | 7230 | 114 |
| H(11B) | 4975 | 10278 | 7169 | 114 |
| H(11C) | 3691 | 10334 | 6738 | 121 |
| H(11D) | 3578 | 9753  | 6760 | 121 |
| H(11E) | 3668 | 10074 | 7206 | 121 |
| H(11F) | 4415 | 11028 | 6723 | 155 |
| H(11G) | 4728 | 11048 | 7158 | 155 |
| H(11H) | 4955 | 11044 | 6680 | 155 |
| H(61C) | 3726 | 9490  | 6910 | 117 |
| H(61D) | 3637 | 9851  | 7246 | 117 |
| H(61E) | 3520 | 9857  | 6731 | 117 |
| H(61F) | 4189 | 10790 | 6737 | 133 |
| H(61G) | 4443 | 10829 | 7211 | 133 |
| H(61H) | 4788 | 10970 | 6774 | 133 |
| H(118) | 4487 | 11096 | 3754 | 62  |
| H(11I) | 4703 | 11257 | 2996 | 78  |
| H(11J) | 5163 | 11104 | 3056 | 78  |
| H(12A) | 4287 | 9790  | 3373 | 151 |
| H(12B) | 4661 | 10080 | 2965 | 151 |
| H(12C) | 4877 | 10211 | 3460 | 151 |
| H(12D) | 3662 | 10001 | 3322 | 145 |
| H(12E) | 3785 | 10583 | 3368 | 145 |
| H(12F) | 3820 | 10364 | 2895 | 145 |
| H(124) | 3252 | 8682  | 3666 | 54  |
| H(126) | 3116 | 7312  | 3378 | 67  |
| H(128) | 2962 | 7654  | 4634 | 50  |
| H(13A) | 2665 | 8246  | 2827 | 83  |
| H(13B) | 3163 | 8788  | 2941 | 83  |
| H(13C) | 3109 | 8531  | 2466 | 83  |
| H(13D) | 4027 | 8272  | 3024 | 101 |
| H(13E) | 3972 | 8546  | 2590 | 101 |
| H(13F) | 4026 | 8803  | 3065 | 101 |
| H(13G) | 2753 | 7465  | 2678 | 88  |
| H(13H) | 3235 | 7780  | 2356 | 88  |
| H(13I) | 3288 | 7488  | 2777 | 88  |

|        |      |      |      |     |
|--------|------|------|------|-----|
| H(63D) | 2769 | 8445 | 2993 | 83  |
| H(63E) | 2892 | 8368 | 2493 | 83  |
| H(63F) | 2521 | 7878 | 2789 | 83  |
| H(63G) | 3772 | 8960 | 3110 | 88  |
| H(63H) | 4098 | 8692 | 2974 | 88  |
| H(63I) | 3815 | 8840 | 2602 | 88  |
| H(63J) | 3437 | 8004 | 2345 | 101 |
| H(63K) | 3658 | 7804 | 2732 | 101 |
| H(63L) | 3052 | 7512 | 2632 | 101 |
| H(13J) | 2794 | 6178 | 3948 | 131 |
| H(13K) | 2536 | 6433 | 3654 | 131 |
| H(13L) | 3142 | 6646 | 3623 | 131 |
| H(13M) | 3409 | 7197 | 4730 | 142 |
| H(13O) | 3279 | 6619 | 4636 | 142 |
| H(13P) | 3689 | 7080 | 4334 | 142 |
| H(13Q) | 2462 | 6831 | 4724 | 117 |
| H(13R) | 2132 | 6539 | 4296 | 117 |
| H(13S) | 2381 | 6279 | 4592 | 117 |
| H(63M) | 2684 | 6596 | 3562 | 177 |
| H(63N) | 2587 | 6154 | 3910 | 177 |
| H(63O) | 2225 | 6406 | 3912 | 177 |
| H(63P) | 3566 | 7025 | 3756 | 159 |
| H(63Q) | 3759 | 7253 | 4241 | 159 |
| H(63R) | 3510 | 6648 | 4153 | 159 |
| H(63S) | 3116 | 7076 | 4814 | 115 |
| H(63T) | 2511 | 6723 | 4730 | 115 |
| H(63U) | 2872 | 6472 | 4727 | 115 |
| H(139) | 723  | 7336 | 6347 | 58  |
| H(140) | -8   | 7321 | 6064 | 65  |
| H(141) | 54   | 7877 | 5500 | 57  |
| H(144) | 2434 | 8001 | 6567 | 64  |
| H(14A) | 2542 | 7302 | 6840 | 74  |
| H(14B) | 2038 | 6878 | 6544 | 74  |
| H(14C) | 3288 | 8037 | 5895 | 152 |
| H(14D) | 3220 | 8159 | 6397 | 152 |
| H(14E) | 3344 | 7710 | 6287 | 152 |

|        |      |       |      |     |
|--------|------|-------|------|-----|
| H(14F) | 2623 | 7452  | 5492 | 123 |
| H(14G) | 2447 | 6918  | 5740 | 123 |
| H(14H) | 2052 | 7126  | 5687 | 123 |
| H(150) | 1099 | 9266  | 4528 | 56  |
| H(15A) | 569  | 9580  | 4222 | 67  |
| H(15B) | 133  | 9288  | 4620 | 67  |
| H(15C) | 1032 | 10042 | 5510 | 88  |
| H(15D) | 514  | 9987  | 5308 | 88  |
| H(15E) | 530  | 9485  | 5464 | 88  |
| H(15F) | 1473 | 10176 | 4419 | 92  |
| H(15G) | 1338 | 10539 | 4710 | 92  |
| H(15H) | 1670 | 10309 | 4919 | 92  |
| H(156) | 3016 | 10756 | 6512 | 44  |
| H(158) | 2838 | 11997 | 6400 | 45  |
| H(160) | 2805 | 11205 | 5310 | 44  |
| H(16A) | 3422 | 11402 | 7539 | 109 |
| H(16B) | 3332 | 11014 | 7141 | 109 |
| H(16C) | 3737 | 11615 | 7087 | 109 |
| H(16D) | 2186 | 11101 | 7096 | 124 |
| H(16E) | 2382 | 10694 | 7129 | 124 |
| H(16F) | 2452 | 11059 | 7541 | 124 |
| H(16G) | 2799 | 12023 | 7076 | 68  |
| H(16H) | 3066 | 11974 | 7517 | 68  |
| H(16I) | 3407 | 12242 | 7087 | 68  |
| H(66A) | 3592 | 11573 | 7459 | 109 |
| H(66B) | 3555 | 11237 | 7035 | 109 |
| H(66C) | 3791 | 11845 | 6988 | 109 |
| H(66D) | 2666 | 11065 | 7624 | 124 |
| H(66E) | 2249 | 10912 | 7238 | 124 |
| H(66F) | 2632 | 10686 | 7237 | 124 |
| H(66G) | 3029 | 11947 | 7530 | 68  |
| H(66H) | 3292 | 12237 | 7078 | 68  |
| H(66I) | 2678 | 11924 | 7122 | 68  |
| H(16J) | 1908 | 11563 | 5585 | 88  |
| H(16K) | 2070 | 11907 | 5147 | 88  |
| H(16L) | 2120 | 11401 | 5166 | 88  |

|        |      |       |      |     |
|--------|------|-------|------|-----|
| H(16M) | 2503 | 12348 | 6023 | 101 |
| H(16O) | 3098 | 12680 | 5892 | 101 |
| H(16P) | 2669 | 12688 | 5582 | 101 |
| H(16Q) | 3433 | 12422 | 5252 | 83  |
| H(16R) | 3057 | 11929 | 4963 | 83  |
| H(16S) | 3006 | 12435 | 4944 | 83  |
| H(1S)  | 5499 | 11533 | 6223 | 102 |

---

**Table S6. Torsion angles [°] for C<sub>84</sub>H<sub>96</sub>ClFeN<sub>8</sub>O<sub>4</sub> ([Fe(P2)Cl])**

---

|                        |           |
|------------------------|-----------|
| C(5)-N(1)-C(2)-C(1)    | -178.8(5) |
| Fe(1)-N(1)-C(2)-C(1)   | -10.2(7)  |
| C(5)-N(1)-C(2)-C(3)    | 0.9(5)    |
| Fe(1)-N(1)-C(2)-C(3)   | 169.5(3)  |
| C(20)-C(1)-C(2)-N(1)   | -11.9(8)  |
| C(21)-C(1)-C(2)-N(1)   | 169.3(5)  |
| C(20)-C(1)-C(2)-C(3)   | 168.4(5)  |
| C(21)-C(1)-C(2)-C(3)   | -10.4(8)  |
| N(1)-C(2)-C(3)-C(4)    | 1.7(6)    |
| C(1)-C(2)-C(3)-C(4)    | -178.6(5) |
| C(2)-C(3)-C(4)-C(5)    | -3.5(6)   |
| C(2)-N(1)-C(5)-C(6)    | 169.4(5)  |
| Fe(1)-N(1)-C(5)-C(6)   | 1.5(7)    |
| C(2)-N(1)-C(5)-C(4)    | -3.1(5)   |
| Fe(1)-N(1)-C(5)-C(4)   | -171.0(3) |
| C(3)-C(4)-C(5)-C(6)    | -168.3(5) |
| C(3)-C(4)-C(5)-N(1)    | 4.2(6)    |
| N(1)-C(5)-C(6)-C(7)    | 2.1(7)    |
| C(4)-C(5)-C(6)-C(7)    | 173.5(5)  |
| N(1)-C(5)-C(6)-C(39)   | -177.0(4) |
| C(4)-C(5)-C(6)-C(39)   | -5.6(7)   |
| C(10)-N(2)-C(7)-C(6)   | 176.3(4)  |
| Fe(1)-N(2)-C(7)-C(6)   | -21.0(7)  |
| C(10)-N(2)-C(7)-C(8)   | -1.3(5)   |
| Fe(1)-N(2)-C(7)-C(8)   | 161.4(3)  |
| C(5)-C(6)-C(7)-N(2)    | 7.9(7)    |
| C(39)-C(6)-C(7)-N(2)   | -172.9(4) |
| C(5)-C(6)-C(7)-C(8)    | -174.9(5) |
| C(39)-C(6)-C(7)-C(8)   | 4.2(7)    |
| N(2)-C(7)-C(8)-C(9)    | -0.1(6)   |
| C(6)-C(7)-C(8)-C(9)    | -177.6(5) |
| C(7)-C(8)-C(9)-C(10)   | 1.4(6)    |
| C(7)-N(2)-C(10)-C(11)  | -172.5(5) |
| Fe(1)-N(2)-C(10)-C(11) | 23.8(6)   |

|                         |           |
|-------------------------|-----------|
| C(7)-N(2)-C(10)-C(9)    | 2.2(5)    |
| Fe(1)-N(2)-C(10)-C(9)   | -161.5(3) |
| C(8)-C(9)-C(10)-N(2)    | -2.3(6)   |
| C(8)-C(9)-C(10)-C(11)   | 172.4(5)  |
| N(2)-C(10)-C(11)-C(12)  | 2.1(8)    |
| C(9)-C(10)-C(11)-C(12)  | -171.8(5) |
| N(2)-C(10)-C(11)-C(53)  | -178.7(4) |
| C(9)-C(10)-C(11)-C(53)  | 7.4(7)    |
| C(15)-N(3)-C(12)-C(11)  | 178.9(5)  |
| Fe(1)-N(3)-C(12)-C(11)  | -15.6(6)  |
| C(15)-N(3)-C(12)-C(13)  | 0.6(5)    |
| Fe(1)-N(3)-C(12)-C(13)  | 166.1(3)  |
| C(10)-C(11)-C(12)-N(3)  | -6.6(8)   |
| C(53)-C(11)-C(12)-N(3)  | 174.3(4)  |
| C(10)-C(11)-C(12)-C(13) | 171.5(5)  |
| C(53)-C(11)-C(12)-C(13) | -7.6(7)   |
| N(3)-C(12)-C(13)-C(14)  | 0.6(6)    |
| C(11)-C(12)-C(13)-C(14) | -177.7(5) |
| C(12)-C(13)-C(14)-C(15) | -1.5(5)   |
| C(12)-N(3)-C(15)-C(16)  | 170.1(5)  |
| Fe(1)-N(3)-C(15)-C(16)  | 5.3(7)    |
| C(12)-N(3)-C(15)-C(14)  | -1.5(5)   |
| Fe(1)-N(3)-C(15)-C(14)  | -166.4(3) |
| C(13)-C(14)-C(15)-N(3)  | 2.0(6)    |
| C(13)-C(14)-C(15)-C(16) | -169.9(5) |
| N(3)-C(15)-C(16)-C(17)  | -0.6(8)   |
| C(14)-C(15)-C(16)-C(17) | 170.0(5)  |
| N(3)-C(15)-C(16)-C(71)  | -177.0(4) |
| C(14)-C(15)-C(16)-C(71) | -6.4(7)   |
| C(20)-N(4)-C(17)-C(16)  | 179.4(5)  |
| Fe(1)-N(4)-C(17)-C(16)  | -20.3(7)  |
| C(20)-N(4)-C(17)-C(18)  | -0.4(5)   |
| Fe(1)-N(4)-C(17)-C(18)  | 159.9(3)  |
| C(15)-C(16)-C(17)-N(4)  | 8.3(8)    |
| C(71)-C(16)-C(17)-N(4)  | -175.3(4) |
| C(15)-C(16)-C(17)-C(18) | -171.9(5) |

|                         |           |
|-------------------------|-----------|
| C(71)-C(16)-C(17)-C(18) | 4.5(7)    |
| N(4)-C(17)-C(18)-C(19)  | -2.6(6)   |
| C(16)-C(17)-C(18)-C(19) | 177.6(5)  |
| C(17)-C(18)-C(19)-C(20) | 4.2(6)    |
| C(17)-N(4)-C(20)-C(1)   | -171.4(5) |
| Fe(1)-N(4)-C(20)-C(1)   | 27.2(7)   |
| C(17)-N(4)-C(20)-C(19)  | 3.1(5)    |
| Fe(1)-N(4)-C(20)-C(19)  | -158.4(3) |
| C(2)-C(1)-C(20)-N(4)    | 2.6(8)    |
| C(21)-C(1)-C(20)-N(4)   | -178.6(5) |
| C(2)-C(1)-C(20)-C(19)   | -171.0(5) |
| C(21)-C(1)-C(20)-C(19)  | 7.8(7)    |
| C(18)-C(19)-C(20)-N(4)  | -4.7(6)   |
| C(18)-C(19)-C(20)-C(1)  | 169.7(5)  |
| C(20)-C(1)-C(21)-C(22)  | 73.9(6)   |
| C(2)-C(1)-C(21)-C(22)   | -107.2(6) |
| C(20)-C(1)-C(21)-C(26)  | -105.5(6) |
| C(2)-C(1)-C(21)-C(26)   | 73.4(6)   |
| C(26)-C(21)-C(22)-C(23) | -2.5(8)   |
| C(1)-C(21)-C(22)-C(23)  | 178.0(5)  |
| C(26)-C(21)-C(22)-N(5)  | 176.9(5)  |
| C(1)-C(21)-C(22)-N(5)   | -2.5(7)   |
| C(27)-N(5)-C(22)-C(21)  | -146.7(6) |
| C(27)-N(5)-C(22)-C(23)  | 32.8(9)   |
| C(21)-C(22)-C(23)-C(24) | 2.8(8)    |
| N(5)-C(22)-C(23)-C(24)  | -176.6(5) |
| C(22)-C(23)-C(24)-C(25) | -1.0(9)   |
| C(23)-C(24)-C(25)-C(26) | -0.9(9)   |
| C(24)-C(25)-C(26)-C(21) | 1.1(8)    |
| C(24)-C(25)-C(26)-N(6)  | 179.9(5)  |
| C(22)-C(21)-C(26)-C(25) | 0.6(7)    |
| C(1)-C(21)-C(26)-C(25)  | 180.0(5)  |
| C(22)-C(21)-C(26)-N(6)  | -178.2(4) |
| C(1)-C(21)-C(26)-N(6)   | 1.2(7)    |
| C(33)-N(6)-C(26)-C(25)  | 44.2(7)   |
| C(33)-N(6)-C(26)-C(21)  | -137.0(5) |



|                         |           |
|-------------------------|-----------|
| C(22)-N(5)-C(27)-O(1)   | -15.9(18) |
| C(22)-N(5)-C(27)-C(28)  | 164.1(6)  |
| O(1)-C(27)-C(28)-C(29)  | -5.1(19)  |
| N(5)-C(27)-C(28)-C(29)  | 175.0(7)  |
| O(1)-C(27)-C(28)-C(30)  | 62.5(18)  |
| N(5)-C(27)-C(28)-C(30)  | -117.5(7) |
| C(27)-C(28)-C(29)-C(30) | 106.8(8)  |
| C(28)-C(29)-C(30)-C(31) | 102.1(8)  |
| C(28)-C(29)-C(30)-C(32) | -109.3(8) |
| C(27)-C(28)-C(30)-C(31) | 142.0(7)  |
| C(29)-C(28)-C(30)-C(31) | -109.9(8) |
| C(27)-C(28)-C(30)-C(32) | -0.6(9)   |
| C(29)-C(28)-C(30)-C(32) | 107.4(8)  |
| C(27)-C(28)-C(30)-C(29) | -108.1(8) |
| C(26)-N(6)-C(33)-O(2)   | -4.2(8)   |
| C(26)-N(6)-C(33)-C(34)  | 173.3(5)  |
| O(2)-C(33)-C(34)-C(35)  | -17.0(9)  |
| N(6)-C(33)-C(34)-C(35)  | 165.5(5)  |
| O(2)-C(33)-C(34)-C(36)  | 51.6(8)   |
| N(6)-C(33)-C(34)-C(36)  | -125.9(6) |
| C(33)-C(34)-C(35)-C(36) | 109.4(6)  |
| C(34)-C(35)-C(36)-C(38) | 103.9(6)  |
| C(34)-C(35)-C(36)-C(37) | -110.2(6) |
| C(33)-C(34)-C(36)-C(35) | -108.6(6) |
| C(33)-C(34)-C(36)-C(38) | 141.3(6)  |
| C(35)-C(34)-C(36)-C(38) | -110.0(7) |
| C(33)-C(34)-C(36)-C(37) | -1.5(9)   |
| C(35)-C(34)-C(36)-C(37) | 107.1(7)  |
| C(5)-C(6)-C(39)-C(44)   | 118.4(5)  |
| C(7)-C(6)-C(39)-C(44)   | -60.8(6)  |
| C(5)-C(6)-C(39)-C(40)   | -62.0(6)  |
| C(7)-C(6)-C(39)-C(40)   | 118.8(5)  |
| C(44)-C(39)-C(40)-C(41) | 0.2(8)    |
| C(6)-C(39)-C(40)-C(41)  | -179.5(5) |
| C(39)-C(40)-C(41)-C(42) | -0.6(8)   |
| C(39)-C(40)-C(41)-C(45) | 179.7(5)  |

|                         |            |
|-------------------------|------------|
| C(40)-C(41)-C(42)-C(43) | 0.6(9)     |
| C(45)-C(41)-C(42)-C(43) | -179.7(6)  |
| C(41)-C(42)-C(43)-C(44) | -0.1(10)   |
| C(41)-C(42)-C(43)-C(49) | -178.3(6)  |
| C(40)-C(39)-C(44)-C(43) | 0.3(8)     |
| C(6)-C(39)-C(44)-C(43)  | 179.9(5)   |
| C(42)-C(43)-C(44)-C(39) | -0.3(9)    |
| C(49)-C(43)-C(44)-C(39) | 177.8(6)   |
| C(42)-C(41)-C(45)-C(46) | 158.9(11)  |
| C(40)-C(41)-C(45)-C(46) | -21.4(13)  |
| C(42)-C(41)-C(45)-C(47) | -79.1(12)  |
| C(40)-C(41)-C(45)-C(47) | 100.6(12)  |
| C(42)-C(41)-C(45)-C(48) | 37.8(13)   |
| C(40)-C(41)-C(45)-C(48) | -142.5(11) |
| C(42)-C(43)-C(49)-C(50) | 15.1(16)   |
| C(44)-C(43)-C(49)-C(50) | -163.0(13) |
| C(42)-C(43)-C(49)-C(51) | -128.8(11) |
| C(44)-C(43)-C(49)-C(51) | 53.1(13)   |
| C(42)-C(43)-C(49)-C(52) | 122.7(8)   |
| C(44)-C(43)-C(49)-C(52) | -55.4(9)   |
| C(12)-C(11)-C(53)-C(58) | -108.0(5)  |
| C(10)-C(11)-C(53)-C(58) | 72.8(6)    |
| C(12)-C(11)-C(53)-C(54) | 75.4(6)    |
| C(10)-C(11)-C(53)-C(54) | -103.8(5)  |
| C(58)-C(53)-C(54)-C(55) | -0.2(7)    |
| C(11)-C(53)-C(54)-C(55) | 176.4(5)   |
| C(58)-C(53)-C(54)-N(7)  | -179.6(4)  |
| C(11)-C(53)-C(54)-N(7)  | -3.0(7)    |
| C(59)-N(7)-C(54)-C(55)  | -1.6(8)    |
| C(59)-N(7)-C(54)-C(53)  | 177.8(5)   |
| C(53)-C(54)-C(55)-C(56) | 0.4(8)     |
| N(7)-C(54)-C(55)-C(56)  | 179.8(5)   |
| C(54)-C(55)-C(56)-C(57) | -0.4(9)    |
| C(55)-C(56)-C(57)-C(58) | 0.1(9)     |
| C(54)-C(53)-C(58)-C(57) | 0.0(7)     |
| C(11)-C(53)-C(58)-C(57) | -176.7(5)  |

|                         |           |
|-------------------------|-----------|
| C(54)-C(53)-C(58)-N(8)  | 180.0(4)  |
| C(11)-C(53)-C(58)-N(8)  | 3.3(7)    |
| C(56)-C(57)-C(58)-C(53) | 0.1(8)    |
| C(56)-C(57)-C(58)-N(8)  | -179.9(5) |
| C(65)-N(8)-C(58)-C(53)  | -126.8(5) |
| C(65)-N(8)-C(58)-C(57)  | 53.2(7)   |
| C(54)-N(7)-C(59)-O(3)   | -1.2(9)   |
| C(54)-N(7)-C(59)-C(60)  | 178.5(5)  |
| O(3)-C(59)-C(60)-C(61)  | -22.6(9)  |
| N(7)-C(59)-C(60)-C(61)  | 157.7(5)  |
| O(3)-C(59)-C(60)-C(62)  | 45.7(9)   |
| N(7)-C(59)-C(60)-C(62)  | -134.1(6) |
| C(59)-C(60)-C(61)-C(62) | 111.2(6)  |
| C(60)-C(61)-C(62)-C(64) | -109.6(6) |
| C(60)-C(61)-C(62)-C(63) | 104.7(6)  |
| C(59)-C(60)-C(62)-C(61) | -106.9(6) |
| C(59)-C(60)-C(62)-C(64) | 2.2(9)    |
| C(61)-C(60)-C(62)-C(64) | 109.0(7)  |
| C(59)-C(60)-C(62)-C(63) | 144.3(6)  |
| C(61)-C(60)-C(62)-C(63) | -108.9(7) |
| C(58)-N(8)-C(65)-O(4)   | -3.5(8)   |
| C(58)-N(8)-C(65)-C(66)  | 177.3(5)  |
| O(4)-C(65)-C(66)-C(67)  | -9.0(8)   |
| N(8)-C(65)-C(66)-C(67)  | 170.2(5)  |
| O(4)-C(65)-C(66)-C(68)  | 59.1(8)   |
| N(8)-C(65)-C(66)-C(68)  | -121.7(5) |
| C(65)-C(66)-C(67)-C(68) | 111.1(6)  |
| C(66)-C(67)-C(68)-C(69) | -110.4(6) |
| C(66)-C(67)-C(68)-C(70) | 104.3(6)  |
| C(65)-C(66)-C(68)-C(67) | -106.2(6) |
| C(65)-C(66)-C(68)-C(69) | 2.3(9)    |
| C(67)-C(66)-C(68)-C(69) | 108.6(7)  |
| C(65)-C(66)-C(68)-C(70) | 146.8(5)  |
| C(67)-C(66)-C(68)-C(70) | -106.9(6) |
| C(17)-C(16)-C(71)-C(76) | -71.0(6)  |
| C(15)-C(16)-C(71)-C(76) | 105.7(5)  |

|                          |           |
|--------------------------|-----------|
| C(17)-C(16)-C(71)-C(72)  | 106.1(5)  |
| C(15)-C(16)-C(71)-C(72)  | -77.2(6)  |
| C(76)-C(71)-C(72)-C(73)  | 0.1(7)    |
| C(16)-C(71)-C(72)-C(73)  | -177.0(4) |
| C(71)-C(72)-C(73)-C(74)  | 0.4(7)    |
| C(71)-C(72)-C(73)-C(77)  | 179.9(4)  |
| C(72)-C(73)-C(74)-C(75)  | 0.1(7)    |
| C(77)-C(73)-C(74)-C(75)  | -179.3(4) |
| C(73)-C(74)-C(75)-C(76)  | -1.1(7)   |
| C(73)-C(74)-C(75)-C(81)  | 177.9(5)  |
| C(72)-C(71)-C(76)-C(75)  | -1.2(7)   |
| C(16)-C(71)-C(76)-C(75)  | 176.0(4)  |
| C(74)-C(75)-C(76)-C(71)  | 1.6(7)    |
| C(81)-C(75)-C(76)-C(71)  | -177.4(4) |
| C(74)-C(73)-C(77)-C(78)  | 120.8(5)  |
| C(72)-C(73)-C(77)-C(78)  | -58.6(6)  |
| C(74)-C(73)-C(77)-C(80)  | 1.0(7)    |
| C(72)-C(73)-C(77)-C(80)  | -178.5(4) |
| C(74)-C(73)-C(77)-C(79)  | -118.8(5) |
| C(72)-C(73)-C(77)-C(79)  | 61.8(6)   |
| C(76)-C(75)-C(81)-C(82)  | -85.8(6)  |
| C(74)-C(75)-C(81)-C(82)  | 95.2(6)   |
| C(76)-C(75)-C(81)-C(83)  | 152.6(5)  |
| C(74)-C(75)-C(81)-C(83)  | -26.4(7)  |
| C(76)-C(75)-C(81)-C(84)  | 33.7(7)   |
| C(74)-C(75)-C(81)-C(84)  | -145.3(5) |
| C(89)-N(9)-C(86)-C(85)   | -179.1(5) |
| Fe(2)-N(9)-C(86)-C(85)   | -11.4(7)  |
| C(89)-N(9)-C(86)-C(87)   | 1.2(5)    |
| Fe(2)-N(9)-C(86)-C(87)   | 168.8(3)  |
| C(104)-C(85)-C(86)-N(9)  | -12.2(8)  |
| C(105)-C(85)-C(86)-N(9)  | 167.1(5)  |
| C(104)-C(85)-C(86)-C(87) | 167.6(5)  |
| C(105)-C(85)-C(86)-C(87) | -13.2(8)  |
| N(9)-C(86)-C(87)-C(88)   | 1.9(6)    |
| C(85)-C(86)-C(87)-C(88)  | -177.9(5) |

|                          |           |
|--------------------------|-----------|
| C(86)-C(87)-C(88)-C(89)  | -4.0(6)   |
| C(86)-N(9)-C(89)-C(90)   | 169.6(5)  |
| Fe(2)-N(9)-C(89)-C(90)   | 2.8(7)    |
| C(86)-N(9)-C(89)-C(88)   | -3.7(5)   |
| Fe(2)-N(9)-C(89)-C(88)   | -170.5(3) |
| C(87)-C(88)-C(89)-C(90)  | -168.4(5) |
| C(87)-C(88)-C(89)-N(9)   | 4.9(6)    |
| N(9)-C(89)-C(90)-C(91)   | 1.7(8)    |
| C(88)-C(89)-C(90)-C(91)  | 173.9(5)  |
| N(9)-C(89)-C(90)-C(123)  | -178.7(4) |
| C(88)-C(89)-C(90)-C(123) | -6.5(8)   |
| C(94)-N(10)-C(91)-C(90)  | 177.2(5)  |
| Fe(2)-N(10)-C(91)-C(90)  | -20.2(7)  |
| C(94)-N(10)-C(91)-C(92)  | -0.6(5)   |
| Fe(2)-N(10)-C(91)-C(92)  | 162.0(3)  |
| C(89)-C(90)-C(91)-N(10)  | 7.3(8)    |
| C(123)-C(90)-C(91)-N(10) | -172.3(4) |
| C(89)-C(90)-C(91)-C(92)  | -175.3(5) |
| C(123)-C(90)-C(91)-C(92) | 5.1(8)    |
| N(10)-C(91)-C(92)-C(93)  | -0.3(6)   |
| C(90)-C(91)-C(92)-C(93)  | -178.1(5) |
| C(91)-C(92)-C(93)-C(94)  | 1.1(6)    |
| C(91)-N(10)-C(94)-C(95)  | -174.5(5) |
| Fe(2)-N(10)-C(94)-C(95)  | 21.9(7)   |
| C(91)-N(10)-C(94)-C(93)  | 1.2(5)    |
| Fe(2)-N(10)-C(94)-C(93)  | -162.4(3) |
| C(92)-C(93)-C(94)-N(10)  | -1.4(6)   |
| C(92)-C(93)-C(94)-C(95)  | 174.3(5)  |
| N(10)-C(94)-C(95)-C(96)  | 3.5(8)    |
| C(93)-C(94)-C(95)-C(96)  | -171.6(5) |
| N(10)-C(94)-C(95)-C(137) | -176.2(5) |
| C(93)-C(94)-C(95)-C(137) | 8.7(7)    |
| C(99)-N(11)-C(96)-C(95)  | 178.6(5)  |
| Fe(2)-N(11)-C(96)-C(95)  | -16.1(7)  |
| C(99)-N(11)-C(96)-C(97)  | 0.8(5)    |
| Fe(2)-N(11)-C(96)-C(97)  | 166.0(3)  |

|                             |           |
|-----------------------------|-----------|
| C(94)-C(95)-C(96)-N(11)     | -6.8(8)   |
| C(137)-C(95)-C(96)-N(11)    | 172.9(4)  |
| C(94)-C(95)-C(96)-C(97)     | 170.7(5)  |
| C(137)-C(95)-C(96)-C(97)    | -9.5(7)   |
| N(11)-C(96)-C(97)-C(98)     | 0.8(6)    |
| C(95)-C(96)-C(97)-C(98)     | -177.0(5) |
| C(96)-C(97)-C(98)-C(99)     | -2.0(6)   |
| C(96)-N(11)-C(99)-C(100)    | 171.3(5)  |
| Fe(2)-N(11)-C(99)-C(100)    | 6.8(7)    |
| C(96)-N(11)-C(99)-C(98)     | -2.0(5)   |
| Fe(2)-N(11)-C(99)-C(98)     | -166.5(3) |
| C(97)-C(98)-C(99)-N(11)     | 2.5(6)    |
| C(97)-C(98)-C(99)-C(100)    | -170.8(5) |
| N(11)-C(99)-C(100)-C(101)   | -1.5(8)   |
| C(98)-C(99)-C(100)-C(101)   | 170.9(5)  |
| N(11)-C(99)-C(100)-C(155)   | -176.9(4) |
| C(98)-C(99)-C(100)-C(155)   | -4.5(7)   |
| C(104)-N(12)-C(101)-C(100)  | -179.6(5) |
| Fe(2)-N(12)-C(101)-C(100)   | -18.4(7)  |
| C(104)-N(12)-C(101)-C(102)  | 0.3(6)    |
| Fe(2)-N(12)-C(101)-C(102)   | 161.4(4)  |
| C(99)-C(100)-C(101)-N(12)   | 7.5(8)    |
| C(155)-C(100)-C(101)-N(12)  | -177.1(4) |
| C(99)-C(100)-C(101)-C(102)  | -172.3(5) |
| C(155)-C(100)-C(101)-C(102) | 3.1(8)    |
| N(12)-C(101)-C(102)-C(103)  | -2.3(6)   |
| C(100)-C(101)-C(102)-C(103) | 177.5(5)  |
| C(101)-C(102)-C(103)-C(104) | 3.2(6)    |
| C(101)-N(12)-C(104)-C(85)   | -173.3(5) |
| Fe(2)-N(12)-C(104)-C(85)    | 24.3(7)   |
| C(101)-N(12)-C(104)-C(103)  | 1.8(6)    |
| Fe(2)-N(12)-C(104)-C(103)   | -160.6(4) |
| C(86)-C(85)-C(104)-N(12)    | 4.9(8)    |
| C(105)-C(85)-C(104)-N(12)   | -174.4(5) |
| C(86)-C(85)-C(104)-C(103)   | -169.6(5) |
| C(105)-C(85)-C(104)-C(103)  | 11.2(8)   |

|                             |            |
|-----------------------------|------------|
| C(102)-C(103)-C(104)-N(12)  | -3.2(6)    |
| C(102)-C(103)-C(104)-C(85)  | 171.9(5)   |
| C(86)-C(85)-C(105)-C(110)   | 79.2(6)    |
| C(104)-C(85)-C(105)-C(110)  | -101.5(6)  |
| C(86)-C(85)-C(105)-C(106)   | -101.6(6)  |
| C(104)-C(85)-C(105)-C(106)  | 77.7(6)    |
| C(110)-C(105)-C(106)-C(107) | -2.9(8)    |
| C(85)-C(105)-C(106)-C(107)  | 177.9(5)   |
| C(110)-C(105)-C(106)-N(13)  | 177.3(5)   |
| C(85)-C(105)-C(106)-N(13)   | -2.0(7)    |
| C(111)-N(13)-C(106)-C(107)  | 32.9(9)    |
| C(111)-N(13)-C(106)-C(105)  | -147.2(6)  |
| C(105)-C(106)-C(107)-C(108) | 2.6(9)     |
| N(13)-C(106)-C(107)-C(108)  | -177.5(5)  |
| C(106)-C(107)-C(108)-C(109) | -0.2(9)    |
| C(107)-C(108)-C(109)-C(110) | -1.9(9)    |
| C(108)-C(109)-C(110)-C(105) | 1.6(8)     |
| C(108)-C(109)-C(110)-N(14)  | 179.6(5)   |
| C(106)-C(105)-C(110)-C(109) | 0.7(8)     |
| C(85)-C(105)-C(110)-C(109)  | 180.0(5)   |
| C(106)-C(105)-C(110)-N(14)  | -177.3(4)  |
| C(85)-C(105)-C(110)-N(14)   | 1.9(7)     |
| C(117)-N(14)-C(110)-C(109)  | 46.6(8)    |
| C(117)-N(14)-C(110)-C(105)  | -135.3(6)  |
| C(106)-N(13)-C(111)-O(5)    | 5.1(18)    |
| C(106)-N(13)-C(111)-C(112)  | 167.2(6)   |
| O(5)-C(111)-C(112)-C(113)   | -21.5(19)  |
| N(13)-C(111)-C(112)-C(113)  | 176.0(7)   |
| O(5)-C(111)-C(112)-C(114)   | 45.1(18)   |
| N(13)-C(111)-C(112)-C(114)  | -117.3(7)  |
| C(111)-C(112)-C(113)-C(114) | 106.9(9)   |
| C(112)-C(113)-C(114)-C(115) | 106.7(11)  |
| C(112)-C(113)-C(114)-C(116) | -108.0(9)  |
| C(111)-C(112)-C(114)-C(113) | -108.3(8)  |
| C(111)-C(112)-C(114)-C(115) | 132.9(12)  |
| C(113)-C(112)-C(114)-C(115) | -118.8(14) |

|                             |           |
|-----------------------------|-----------|
| C(111)-C(112)-C(114)-C(116) | -1.0(12)  |
| C(113)-C(112)-C(114)-C(116) | 107.3(11) |
| C(110)-N(14)-C(117)-O(6)    | -12.6(16) |
| C(110)-N(14)-C(117)-C(118)  | 174.4(5)  |
| O(6)-C(117)-C(118)-C(119)   | -5.5(17)  |
| N(14)-C(117)-C(118)-C(119)  | 167.2(6)  |
| O(6)-C(117)-C(118)-C(120)   | 64.0(16)  |
| N(14)-C(117)-C(118)-C(120)  | -123.3(6) |
| C(117)-C(118)-C(119)-C(120) | 108.8(6)  |
| C(118)-C(119)-C(120)-C(121) | -109.0(7) |
| C(118)-C(119)-C(120)-C(122) | 104.3(7)  |
| C(117)-C(118)-C(120)-C(119) | -110.0(6) |
| C(117)-C(118)-C(120)-C(121) | -3.3(10)  |
| C(119)-C(118)-C(120)-C(121) | 106.7(8)  |
| C(117)-C(118)-C(120)-C(122) | 140.9(7)  |
| C(119)-C(118)-C(120)-C(122) | -109.1(7) |
| C(89)-C(90)-C(123)-C(124)   | -59.3(6)  |
| C(91)-C(90)-C(123)-C(124)   | 120.4(5)  |
| C(89)-C(90)-C(123)-C(128)   | 121.5(5)  |
| C(91)-C(90)-C(123)-C(128)   | -58.8(7)  |
| C(128)-C(123)-C(124)-C(125) | 0.3(8)    |
| C(90)-C(123)-C(124)-C(125)  | -179.0(5) |
| C(123)-C(124)-C(125)-C(126) | -0.3(8)   |
| C(123)-C(124)-C(125)-C(129) | -178.7(5) |
| C(124)-C(125)-C(126)-C(127) | 0.7(9)    |
| C(129)-C(125)-C(126)-C(127) | 179.1(6)  |
| C(125)-C(126)-C(127)-C(128) | -1.1(9)   |
| C(125)-C(126)-C(127)-C(133) | -178.8(6) |
| C(124)-C(123)-C(128)-C(127) | -0.6(8)   |
| C(90)-C(123)-C(128)-C(127)  | 178.6(5)  |
| C(126)-C(127)-C(128)-C(123) | 1.0(8)    |
| C(133)-C(127)-C(128)-C(123) | 178.8(5)  |
| C(126)-C(125)-C(129)-C(131) | -93.2(9)  |
| C(124)-C(125)-C(129)-C(131) | 85.1(8)   |
| C(126)-C(125)-C(129)-C(130) | 138.4(9)  |
| C(124)-C(125)-C(129)-C(130) | -43.4(10) |



|                             |           |
|-----------------------------|-----------|
| C(126)-C(125)-C(129)-C(132) | 17.8(9)   |
| C(124)-C(125)-C(129)-C(132) | -163.9(7) |
| C(126)-C(127)-C(133)-C(134) | -13.0(12) |
| C(128)-C(127)-C(133)-C(134) | 169.3(9)  |
| C(126)-C(127)-C(133)-C(135) | 115.6(9)  |
| C(128)-C(127)-C(133)-C(135) | -62.0(10) |
| C(126)-C(127)-C(133)-C(136) | -130.1(8) |
| C(128)-C(127)-C(133)-C(136) | 52.2(9)   |
| C(94)-C(95)-C(137)-C(138)   | 71.6(6)   |
| C(96)-C(95)-C(137)-C(138)   | -108.1(5) |
| C(94)-C(95)-C(137)-C(142)   | -109.1(6) |
| C(96)-C(95)-C(137)-C(142)   | 71.1(6)   |
| C(142)-C(137)-C(138)-C(139) | -0.5(7)   |
| C(95)-C(137)-C(138)-C(139)  | 178.8(5)  |
| C(142)-C(137)-C(138)-N(16)  | -178.9(4) |
| C(95)-C(137)-C(138)-N(16)   | 0.4(7)    |
| C(143)-N(16)-C(138)-C(139)  | 43.4(8)   |
| C(143)-N(16)-C(138)-C(137)  | -138.2(5) |
| C(137)-C(138)-C(139)-C(140) | 0.1(8)    |
| N(16)-C(138)-C(139)-C(140)  | 178.6(5)  |
| C(138)-C(139)-C(140)-C(141) | 0.6(9)    |
| C(139)-C(140)-C(141)-C(142) | -1.1(9)   |
| C(140)-C(141)-C(142)-C(137) | 0.8(8)    |
| C(140)-C(141)-C(142)-N(15)  | -179.5(5) |
| C(138)-C(137)-C(142)-C(141) | 0.0(7)    |
| C(95)-C(137)-C(142)-C(141)  | -179.3(5) |
| C(138)-C(137)-C(142)-N(15)  | -179.7(4) |
| C(95)-C(137)-C(142)-N(15)   | 1.0(7)    |
| C(149)-N(15)-C(142)-C(141)  | 30.0(8)   |
| C(149)-N(15)-C(142)-C(137)  | -150.3(5) |
| C(138)-N(16)-C(143)-O(8)    | 0.4(9)    |
| C(138)-N(16)-C(143)-C(144)  | 178.9(5)  |
| O(8)-C(143)-C(144)-C(145)   | -8.8(9)   |
| N(16)-C(143)-C(144)-C(145)  | 172.8(5)  |
| O(8)-C(143)-C(144)-C(146)   | 59.1(8)   |
| N(16)-C(143)-C(144)-C(146)  | -119.4(6) |

|                             |           |
|-----------------------------|-----------|
| C(143)-C(144)-C(145)-C(146) | 111.3(6)  |
| C(144)-C(145)-C(146)-C(148) | -108.8(6) |
| C(144)-C(145)-C(146)-C(147) | 104.5(7)  |
| C(143)-C(144)-C(146)-C(145) | -105.8(6) |
| C(143)-C(144)-C(146)-C(148) | 2.8(9)    |
| C(145)-C(144)-C(146)-C(148) | 108.6(7)  |
| C(143)-C(144)-C(146)-C(147) | 145.0(6)  |
| C(145)-C(144)-C(146)-C(147) | -109.1(7) |
| C(142)-N(15)-C(149)-O(7)    | -13.0(9)  |
| C(142)-N(15)-C(149)-C(150)  | 166.1(5)  |
| O(7)-C(149)-C(150)-C(151)   | -12.5(8)  |
| N(15)-C(149)-C(150)-C(151)  | 168.5(5)  |
| O(7)-C(149)-C(150)-C(152)   | 57.0(8)   |
| N(15)-C(149)-C(150)-C(152)  | -122.1(5) |
| C(149)-C(150)-C(151)-C(152) | 109.1(6)  |
| C(150)-C(151)-C(152)-C(153) | -108.9(6) |
| C(150)-C(151)-C(152)-C(154) | 105.0(6)  |
| C(149)-C(150)-C(152)-C(153) | 0.0(8)    |
| C(151)-C(150)-C(152)-C(153) | 109.0(6)  |
| C(149)-C(150)-C(152)-C(151) | -109.0(6) |
| C(149)-C(150)-C(152)-C(154) | 142.7(5)  |
| C(151)-C(150)-C(152)-C(154) | -108.4(6) |
| C(101)-C(100)-C(155)-C(156) | -87.0(6)  |
| C(99)-C(100)-C(155)-C(156)  | 88.7(6)   |
| C(101)-C(100)-C(155)-C(160) | 90.4(6)   |
| C(99)-C(100)-C(155)-C(160)  | -93.9(6)  |
| C(160)-C(155)-C(156)-C(157) | 0.3(7)    |
| C(100)-C(155)-C(156)-C(157) | 177.7(4)  |
| C(155)-C(156)-C(157)-C(158) | 0.3(7)    |
| C(155)-C(156)-C(157)-C(161) | 178.7(5)  |
| C(156)-C(157)-C(158)-C(159) | -0.6(7)   |
| C(161)-C(157)-C(158)-C(159) | -178.9(5) |
| C(157)-C(158)-C(159)-C(160) | 0.2(7)    |
| C(157)-C(158)-C(159)-C(165) | 178.2(5)  |
| C(156)-C(155)-C(160)-C(159) | -0.8(7)   |
| C(100)-C(155)-C(160)-C(159) | -178.2(4) |

|                             |            |
|-----------------------------|------------|
| C(158)-C(159)-C(160)-C(155) | 0.5(7)     |
| C(165)-C(159)-C(160)-C(155) | -177.6(4)  |
| C(158)-C(157)-C(161)-C(162) | -138.6(15) |
| C(156)-C(157)-C(161)-C(162) | 43.2(15)   |
| C(158)-C(157)-C(161)-C(164) | -14.4(14)  |
| C(156)-C(157)-C(161)-C(164) | 167.3(13)  |
| C(158)-C(157)-C(161)-C(163) | 100.6(14)  |
| C(156)-C(157)-C(161)-C(163) | -77.6(15)  |
| C(158)-C(159)-C(165)-C(168) | 129.1(5)   |
| C(160)-C(159)-C(165)-C(168) | -52.9(6)   |
| C(158)-C(159)-C(165)-C(166) | -110.5(5)  |
| C(160)-C(159)-C(165)-C(166) | 67.5(6)    |
| C(158)-C(159)-C(165)-C(167) | 8.7(7)     |
| C(160)-C(159)-C(165)-C(167) | -173.3(5)  |

---

Symmetry transformations used to generate equivalent atoms:

**Table S7. Hydrogen bonds for C<sub>84</sub>H<sub>96</sub>ClFeN<sub>8</sub>O<sub>4</sub> ([Fe(P2)Cl]) [Å and °]**

| D-H...A               | d(D-H) | d(H...A) | d(D...A) | <(DHA) |
|-----------------------|--------|----------|----------|--------|
| N(6)-H(6N)...O(4)#1   | 0.88   | 2.01     | 2.882(5) | 170.3  |
| N(14)-H(14N)...O(8)#2 | 0.88   | 2.05     | 2.884(6) | 157.5  |

---

Symmetry transformations used to generate equivalent atoms:

#1 x-y,x-1,z-1/6 #2 x-y+1,x+1,z-1/6

**Table S8. Crystal data and structure refinement for C<sub>17</sub>H<sub>25</sub>F<sub>3</sub>N<sub>2</sub>O<sub>2</sub>S (1)**

CCDC: 2128686

|                                   |                                                                                |                             |
|-----------------------------------|--------------------------------------------------------------------------------|-----------------------------|
| Identification code               | C17H25F3N2O2S                                                                  |                             |
| Empirical formula                 | C <sub>17</sub> H <sub>25</sub> F <sub>3</sub> N <sub>2</sub> O <sub>2</sub> S |                             |
| Formula weight                    | 378.45                                                                         |                             |
| Temperature                       | 100(2) K                                                                       |                             |
| Wavelength                        | 1.54178 Å                                                                      |                             |
| Crystal system                    | Monoclinic                                                                     |                             |
| Space group                       | P2 <sub>1</sub>                                                                |                             |
| Unit cell dimensions              | a = 16.6602(10) Å                                                              | $\alpha = 90^\circ$ .       |
|                                   | b = 5.9607(5) Å                                                                | $\beta = 92.424(5)^\circ$ . |
|                                   | c = 19.8051(12) Å                                                              | $\gamma = 90^\circ$ .       |
| Volume                            | 1965.0(2) Å <sup>3</sup>                                                       |                             |
| Z                                 | 4                                                                              |                             |
| Density (calculated)              | 1.279 Mg/m <sup>3</sup>                                                        |                             |
| Absorption coefficient            | 1.824 mm <sup>-1</sup>                                                         |                             |
| F(000)                            | 800                                                                            |                             |
| Crystal size                      | 0.520 x 0.140 x 0.100 mm <sup>3</sup>                                          |                             |
| Theta range for data collection   | 2.233 to 66.883°.                                                              |                             |
| Index ranges                      | -19<=h<=19, -6<=k<=7, -23<=l<=17                                               |                             |
| Reflections collected             | 9844                                                                           |                             |
| Independent reflections           | 5941 [R(int) = 0.0562]                                                         |                             |
| Completeness to theta = 66.883°   | 97.9 %                                                                         |                             |
| Absorption correction             | Semi-empirical from equivalents                                                |                             |
| Max. and min. transmission        | 0.7528 and 0.5512                                                              |                             |
| Refinement method                 | Full-matrix least-squares on F <sup>2</sup>                                    |                             |
| Data / restraints / parameters    | 5941 / 394 / 493                                                               |                             |
| Goodness-of-fit on F <sup>2</sup> | 0.976                                                                          |                             |
| Final R indices [I>2sigma(I)]     | R1 = 0.0554, wR2 = 0.1398                                                      |                             |
| R indices (all data)              | R1 = 0.0692, wR2 = 0.1480                                                      |                             |
| Absolute structure parameter      | 0.04(2)                                                                        |                             |
| Extinction coefficient            | n/a                                                                            |                             |
| Largest diff. peak and hole       | 0.326 and -0.336 e.Å <sup>-3</sup>                                             |                             |

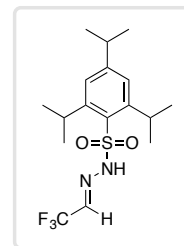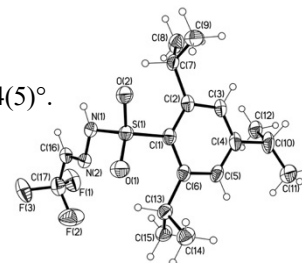

**Table S9. Crystal data and structure refinement for C<sub>16</sub>H<sub>13</sub>F<sub>3</sub> (3n)**

CCDC: 2128688

|                                   |                                             |                                |
|-----------------------------------|---------------------------------------------|--------------------------------|
| Identification code               | C16H13F3                                    |                                |
| Empirical formula                 | C16 H13 F3                                  |                                |
| Formula weight                    | 262.26                                      |                                |
| Temperature                       | 100(2) K                                    |                                |
| Wavelength                        | 1.54178 Å                                   |                                |
| Crystal system                    | Monoclinic                                  |                                |
| Space group                       | P2 <sub>1</sub>                             |                                |
| Unit cell dimensions              | a = 8.5726(4) Å                             | $\alpha = 90^\circ$ .          |
|                                   | b = 6.4407(3) Å                             | $\beta = 104.8920(10)^\circ$ . |
|                                   | c = 12.4882(5) Å                            | $\gamma = 90^\circ$ .          |
| Volume                            | 666.36(5) Å <sup>3</sup>                    |                                |
| Z                                 | 2                                           |                                |
| Density (calculated)              | 1.307 Mg/m <sup>3</sup>                     |                                |
| Absorption coefficient            | 0.883 mm <sup>-1</sup>                      |                                |
| F(000)                            | 272                                         |                                |
| Crystal size                      | 0.420 x 0.160 x 0.120 mm <sup>3</sup>       |                                |
| Theta range for data collection   | 3.662 to 66.716°.                           |                                |
| Index ranges                      | -10 ≤ h ≤ 10, -7 ≤ k ≤ 7, -14 ≤ l ≤ 14      |                                |
| Reflections collected             | 21888                                       |                                |
| Independent reflections           | 2333 [R(int) = 0.0276]                      |                                |
| Completeness to theta = 66.716°   | 99.0 %                                      |                                |
| Absorption correction             | Semi-empirical from equivalents             |                                |
| Max. and min. transmission        | 0.7528 and 0.6551                           |                                |
| Refinement method                 | Full-matrix least-squares on F <sup>2</sup> |                                |
| Data / restraints / parameters    | 2333 / 1 / 172                              |                                |
| Goodness-of-fit on F <sup>2</sup> | 1.087                                       |                                |
| Final R indices [I > 2σ(I)]       | R1 = 0.0277, wR2 = 0.0718                   |                                |
| R indices (all data)              | R1 = 0.0280, wR2 = 0.0722                   |                                |
| Absolute structure parameter      | 0.06(6)                                     |                                |
| Extinction coefficient            | n/a                                         |                                |
| Largest diff. peak and hole       | 0.092 and -0.174 e.Å <sup>-3</sup>          |                                |

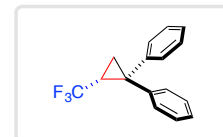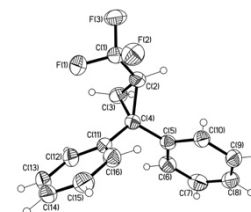

**Table S10. Crystal data and structure refinement for C<sub>22</sub>H<sub>25</sub>F<sub>3</sub>O (3ac)**

CCDC: 2128687

|                                   |                                                          |
|-----------------------------------|----------------------------------------------------------|
| Identification code               | C22H25F3O                                                |
| Empirical formula                 | C <sub>22</sub> H <sub>25</sub> F <sub>3</sub> O         |
| Formula weight                    | 362.42                                                   |
| Temperature                       | 173(2) K                                                 |
| Wavelength                        | 1.54178 Å                                                |
| Crystal system                    | Monoclinic                                               |
| Space group                       | P2 <sub>1</sub>                                          |
| Unit cell dimensions              | a = 11.3887(8) Å<br>b = 6.2200(5) Å<br>c = 12.9743(10) Å |
| Volume                            | 916.16(12) Å <sup>3</sup>                                |
| Z                                 | 2                                                        |
| Density (calculated)              | 1.314 Mg/m <sup>3</sup>                                  |
| Absorption coefficient            | 0.828 mm <sup>-1</sup>                                   |
| F(000)                            | 384                                                      |
| Crystal size                      | 0.460 x 0.340 x 0.120 mm <sup>3</sup>                    |
| Theta range for data collection   | 3.417 to 66.679°.                                        |
| Index ranges                      | -13<=h<=12, -7<=k<=7, -15<=l<=15                         |
| Reflections collected             | 22920                                                    |
| Independent reflections           | 3198 [R(int) = 0.0385]                                   |
| Completeness to theta = 66.679°   | 98.9 %                                                   |
| Absorption correction             | Semi-empirical from equivalents                          |
| Max. and min. transmission        | 0.7528 and 0.6348                                        |
| Refinement method                 | Full-matrix least-squares on F <sup>2</sup>              |
| Data / restraints / parameters    | 3198 / 1 / 235                                           |
| Goodness-of-fit on F <sup>2</sup> | 1.030                                                    |
| Final R indices [I>2sigma(I)]     | R1 = 0.0312, wR2 = 0.0841                                |
| R indices (all data)              | R1 = 0.0341, wR2 = 0.0875                                |
| Absolute structure parameter      | -0.06(6)                                                 |
| Extinction coefficient            | n/a                                                      |
| Largest diff. peak and hole       | 0.139 and -0.154 e.Å <sup>-3</sup>                       |

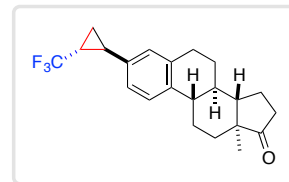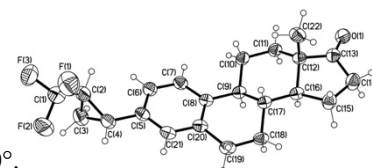 $\alpha = 90^\circ$ . $\beta = 94.562(5)^\circ$ . $\gamma = 90^\circ$ .

**Table S11. Crystal data and structure refinement for C<sub>25</sub>H<sub>22</sub>Sn (8<sup>2</sup>)**

CCDC: 2128689

|                                   |                                                         |
|-----------------------------------|---------------------------------------------------------|
| Identification code               | C <sub>25</sub> H <sub>22</sub> Sn                      |
| Empirical formula                 | C <sub>25</sub> H <sub>22</sub> Sn                      |
| Formula weight                    | 441.11                                                  |
| Temperature                       | 173(2) K                                                |
| Wavelength                        | 1.54178 Å                                               |
| Crystal system                    | Triclinic                                               |
| Space group                       | P-1                                                     |
| Unit cell dimensions              | a = 9.8972(5) Å<br>b = 10.6653(6) Å<br>c = 11.2929(6) Å |
| Volume                            | 1010.05(9) Å <sup>3</sup>                               |
| Z                                 | 2                                                       |
| Density (calculated)              | 1.450 Mg/m <sup>3</sup>                                 |
| Absorption coefficient            | 10.071 mm <sup>-1</sup>                                 |
| F(000)                            | 444                                                     |
| Crystal size                      | 0.380 x 0.140 x 0.050 mm <sup>3</sup>                   |
| Theta range for data collection   | 4.289 to 66.672°.                                       |
| Index ranges                      | -11 ≤ h ≤ 11, -12 ≤ k ≤ 12, -13 ≤ l ≤ 12                |
| Reflections collected             | 16699                                                   |
| Independent reflections           | 3538 [R(int) = 0.0382]                                  |
| Completeness to theta = 66.672°   | 98.6 %                                                  |
| Absorption correction             | Semi-empirical from equivalents                         |
| Max. and min. transmission        | 0.7528 and 0.3038                                       |
| Refinement method                 | Full-matrix least-squares on F <sup>2</sup>             |
| Data / restraints / parameters    | 3538 / 0 / 235                                          |
| Goodness-of-fit on F <sup>2</sup> | 1.047                                                   |
| Final R indices [I > 2σ(I)]       | R1 = 0.0236, wR2 = 0.0610                               |
| R indices (all data)              | R1 = 0.0243, wR2 = 0.0619                               |
| Extinction coefficient            | n/a                                                     |
| Largest diff. peak and hole       | 1.496 and -0.423 e.Å <sup>-3</sup>                      |

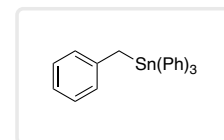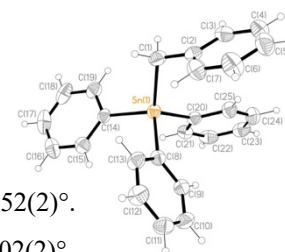

$\alpha = 102.852(2)^\circ$ .  
 $\beta = 103.602(2)^\circ$ .  
 $\gamma = 111.8350(10)^\circ$ .

**Table S12. Crystal data and structure refinement for C<sub>26</sub>H<sub>41</sub>N<sub>3</sub>O<sub>2</sub> (9)**

CCDC: 2043165

|                                   |                                                          |
|-----------------------------------|----------------------------------------------------------|
| Identification code               | C26H41N3O2                                               |
| Empirical formula                 | C26 H41 N3 O2                                            |
| Formula weight                    | 427.62                                                   |
| Temperature                       | 173(2) K                                                 |
| Wavelength                        | 1.54178 Å                                                |
| Crystal system                    | Monoclinic                                               |
| Space group                       | P2 <sub>1</sub> /c                                       |
| Unit cell dimensions              | a = 15.2817(8) Å<br>b = 12.4152(7) Å<br>c = 13.8340(7) Å |
| Volume                            | 2558.8(2) Å <sup>3</sup>                                 |
| Z                                 | 4                                                        |
| Density (calculated)              | 1.110 Mg/m <sup>3</sup>                                  |
| Absorption coefficient            | 0.546 mm <sup>-1</sup>                                   |
| F(000)                            | 936                                                      |
| Crystal size                      | 0.440 x 0.360 x 0.180 mm <sup>3</sup>                    |
| Theta range for data collection   | 2.966 to 66.395°                                         |
| Index ranges                      | -18 ≤ h ≤ 17, -14 ≤ k ≤ 14, -16 ≤ l ≤ 16                 |
| Reflections collected             | 24383                                                    |
| Independent reflections           | 4416 [R(int) = 0.0252]                                   |
| Completeness to theta = 66.395°   | 98.1 %                                                   |
| Absorption correction             | Semi-empirical from equivalents                          |
| Max. and min. transmission        | 0.7528 and 0.6841                                        |
| Refinement method                 | Full-matrix least-squares on F <sup>2</sup>              |
| Data / restraints / parameters    | 4416 / 0 / 288                                           |
| Goodness-of-fit on F <sup>2</sup> | 1.035                                                    |
| Final R indices [I > 2σ(I)]       | R1 = 0.0366, wR2 = 0.0921                                |
| R indices (all data)              | R1 = 0.0400, wR2 = 0.0957                                |
| Extinction coefficient            | n/a                                                      |
| Largest diff. peak and hole       | 0.168 and -0.175 e.Å <sup>-3</sup>                       |

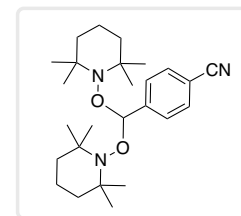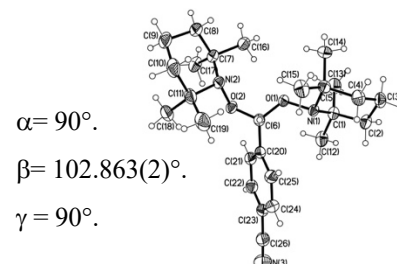



## 8. DFT Calculations

Considering the cost of time and computing resources for the large system with [Fe(**P3**)Cl], the geometry optimizations were performed with the Gaussian 16<sup>8</sup> at the BP86<sup>9,10</sup>/def2-SVP<sup>11,12</sup> level of theory in the gas phase at room temperature. Gas-phase Hessian matrix calculations were applied to the characterization of all minima (without imaginary frequency) and transition states (with only one imaginary frequency).

Thermochemical parameters such as internal energy, enthalpy, entropy, Gibbs free energy and thermal corrections (entropy and enthalpy, 298.15 K, 1 atm) were obtained from these calculations. Intrinsic reaction coordinate (IRC) calculations were performed with local quadratic approximation (LQA)<sup>13,14</sup> method to ensure the transition states found connected the reactant and the product. To further improve the accuracy of energies, single point energies were carried out at the TPSSh<sup>15</sup>/def2-tzvp<sup>13,14</sup> level of theory along with Grimme's dispersion correction<sup>16</sup> (D3BJ) and SMD<sup>17</sup> solvation model (in *n*-hexane).

Independent Gradient Model (IGM)<sup>18</sup> analysis was performed with Multiwfn<sup>19</sup> software package using high quality grid option to generate files for further plotting. The visualization of IGM analysis results were presented with VMD<sup>20</sup> visualization software. As shown in Scheme SX, the 3D diagrams of optimized structures were generated with CYLview software<sup>21</sup>, and the NCI (noncovalent interaction) visual representations and spin density isosurface map of optimized structures were generated with VMD.

**Figure S36:** Calculated Energy Diagram for Radical Cyclopropanation of Styrene (**2a**) with Diazo (**1'**) by  $[\text{Fe}(\text{P}3)\text{Cl}]$

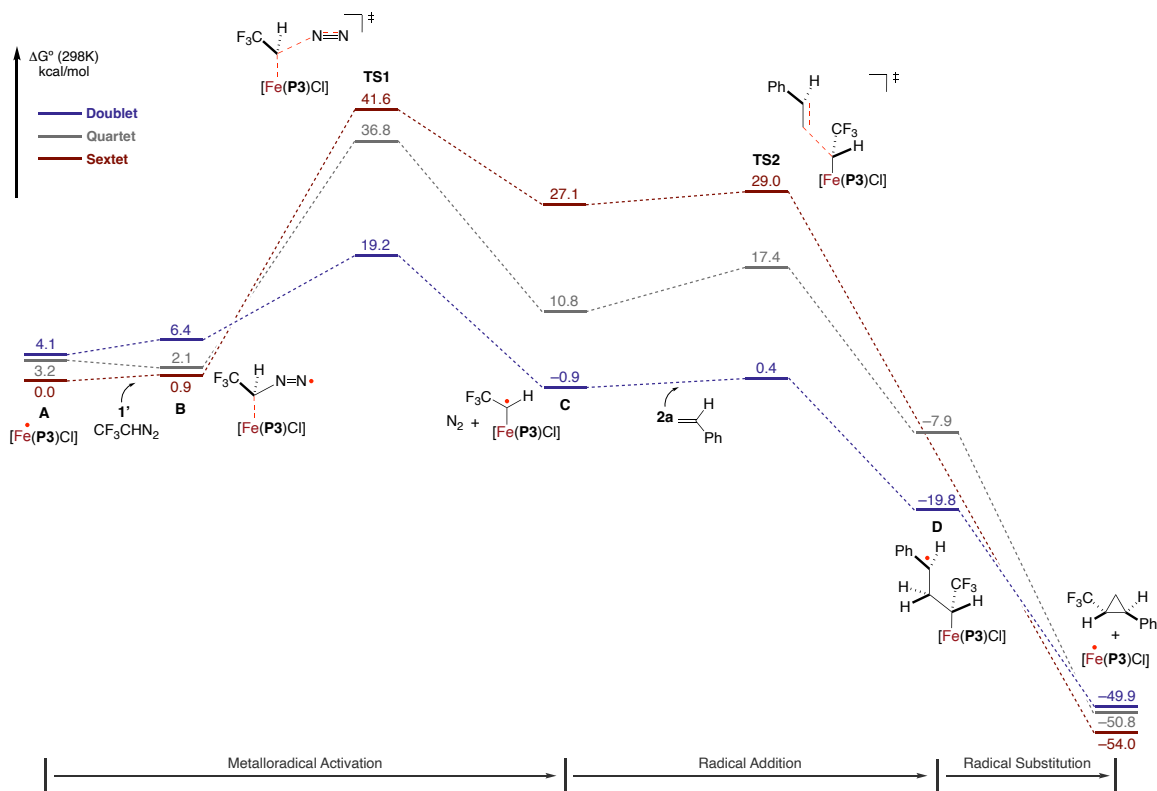

**Figure S37:** Calculated Energy Diagram for Enantioselectivity and Diastereoselectivity on Radical Cyclopropanation of Styrene (**2a**) with Diazo (**1'**) by [Fe(P3)Cl]

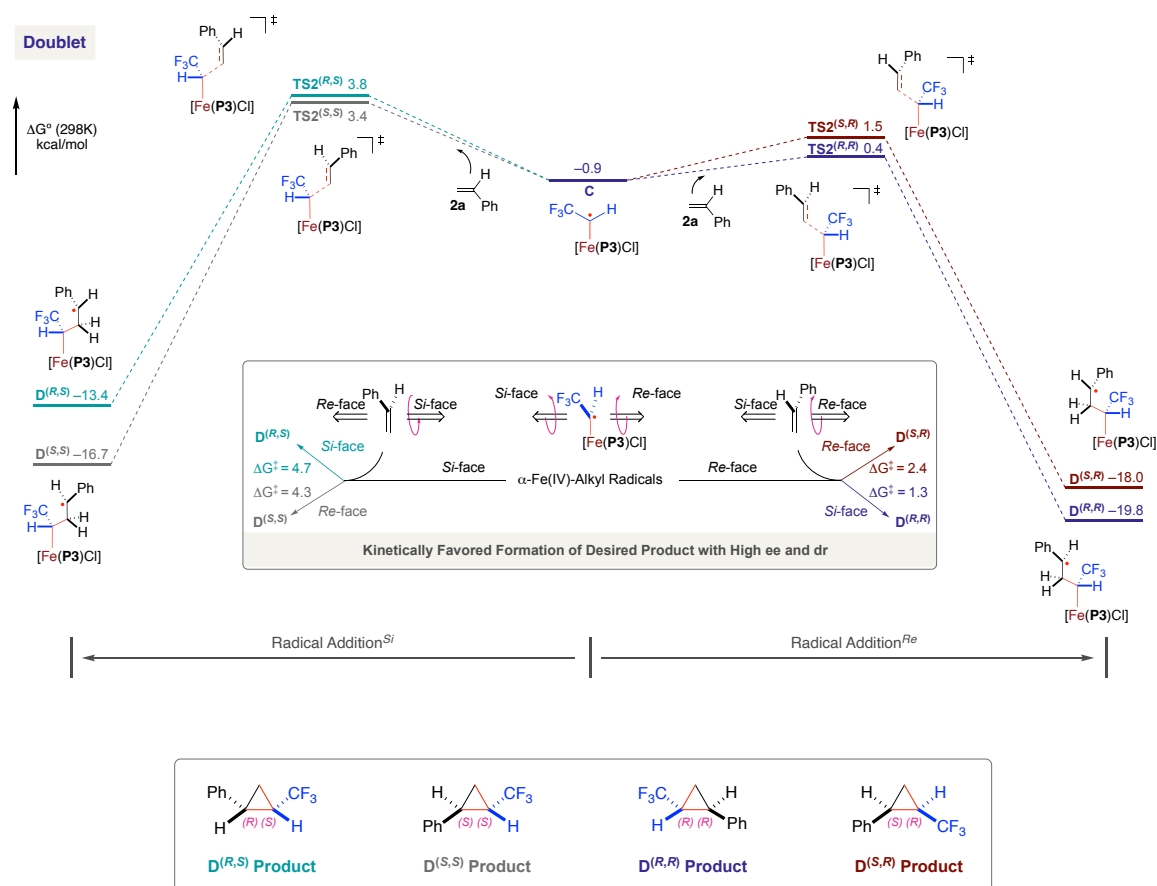

**D<sup>(R,R)</sup>**: *Re*-face of intermediate **C** undergoes radical addition to *Si*-face of **2a**

**D<sup>(S,S)</sup>**: *Si*-face of intermediate **C** undergoes radical addition to *Re*-face of **2a**

**D<sup>(S,R)</sup>**: *Re*-face of intermediate **C** undergoes radical addition to *Re*-face of **2a**

**D<sup>(R,S)</sup>**: *Si*-face of intermediate **C** undergoes radical addition to *Si*-face of **2a**

The following radical substitution steps of four intermediates (**D**) are all barrierless.

**Figure S38:** Calculated Energy Diagram for Cyclopropanation of Styrene (**2a**) with Diazo (**1'**) by [Fe(P3)Cl] through Radical Stepwise and Concerted Pathway

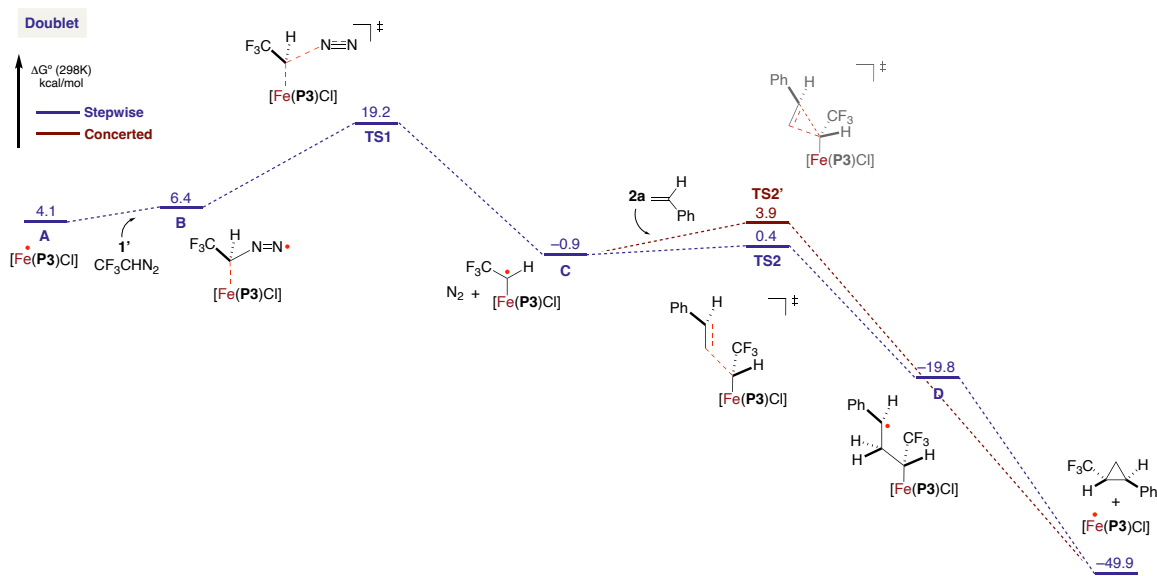

**Figure S39:** Optimized Structure Models, NCI Visual Representation and Spin Density Representation of Intermediates and Transition States (with **1'**)

**Catalyst [Fe(P3)Cl]**

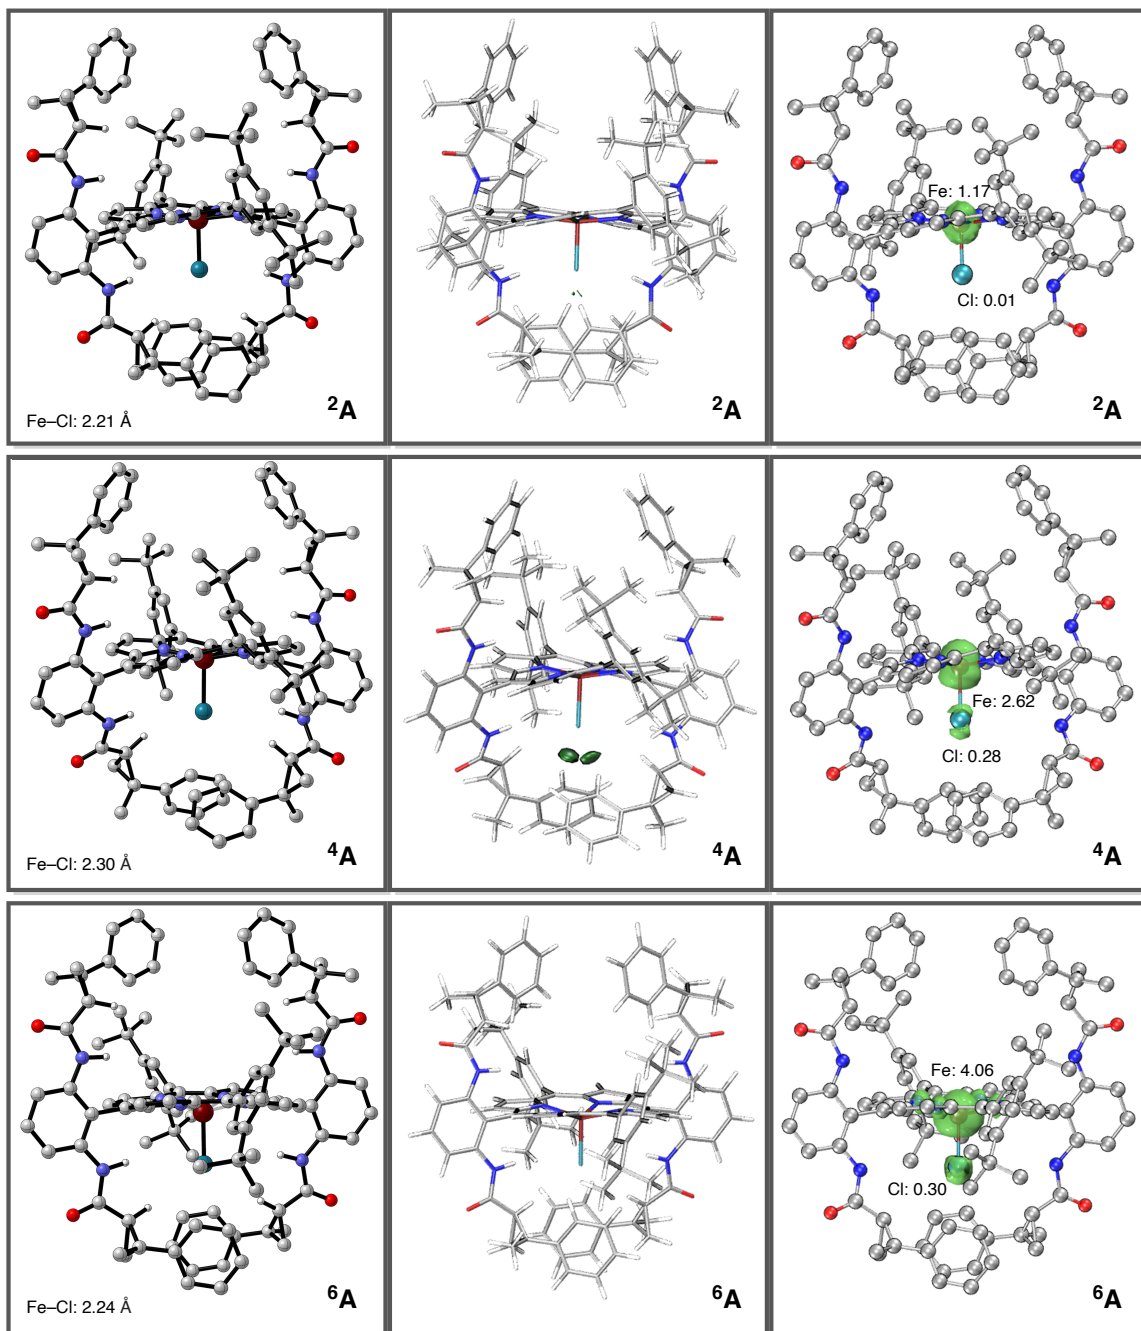

## Intermediate B

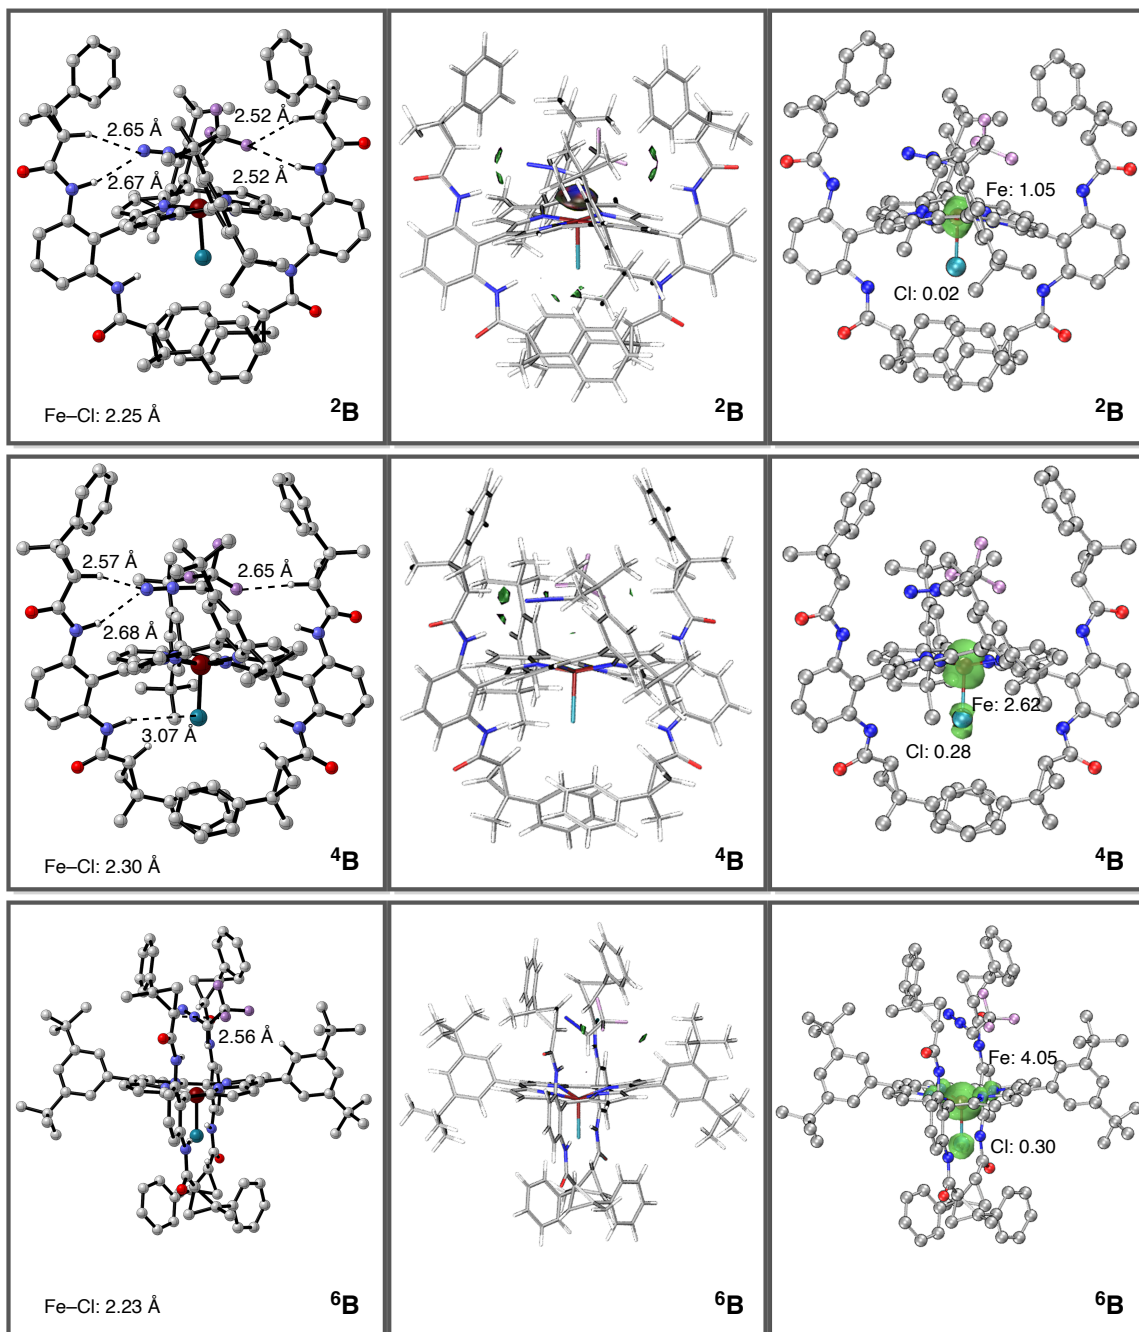

## Transition State 1

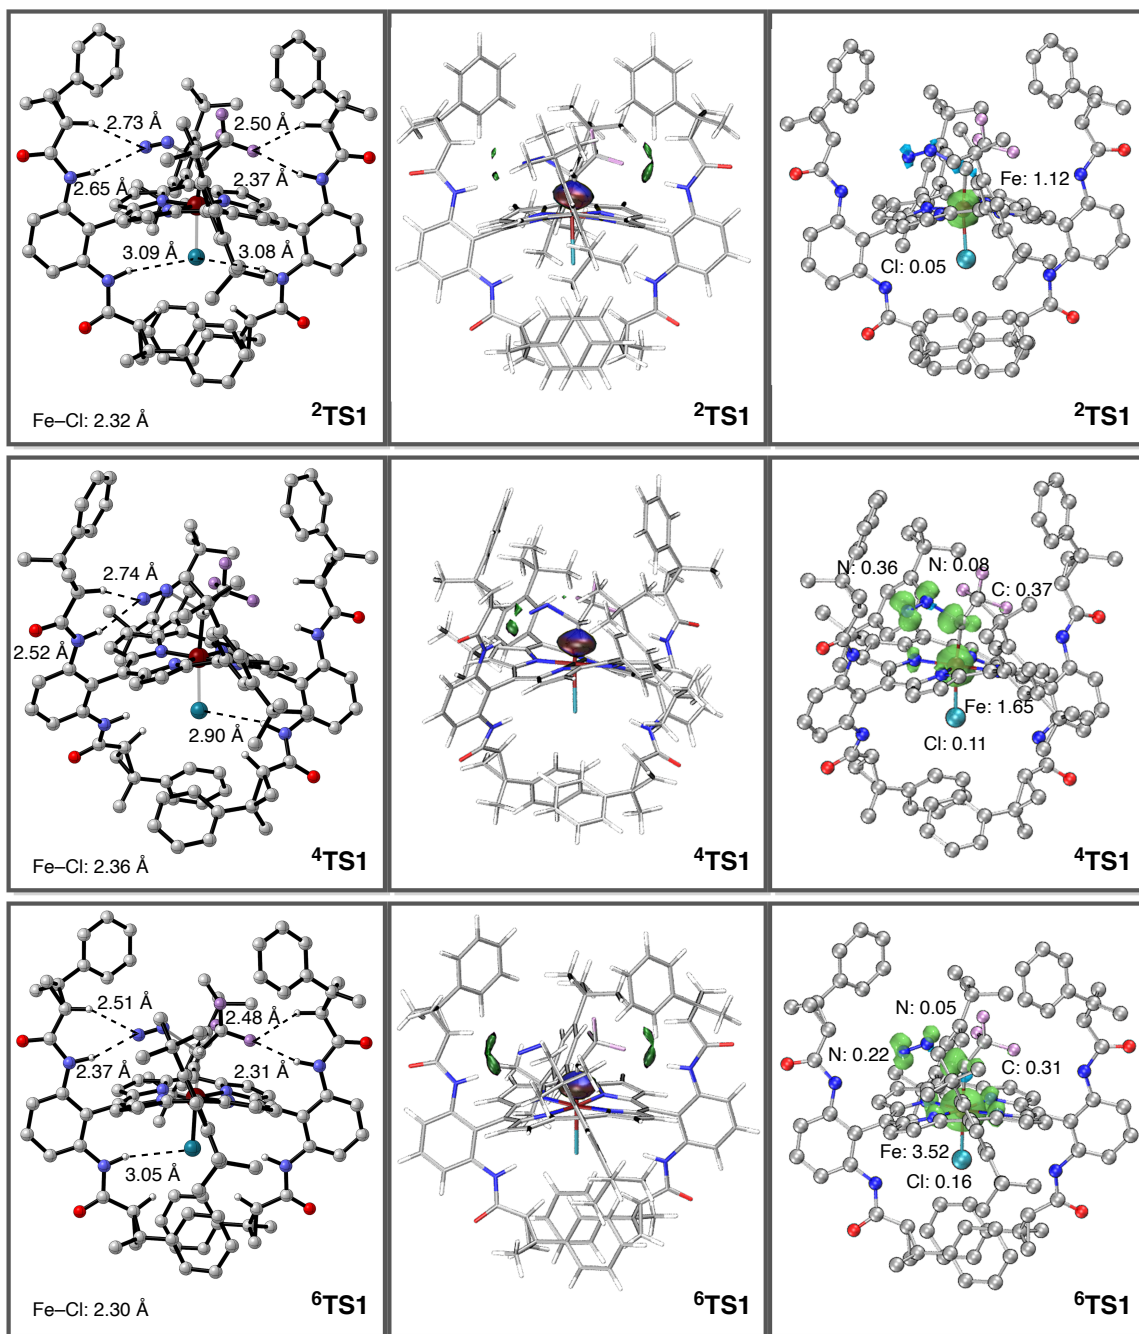

# Intermediate C

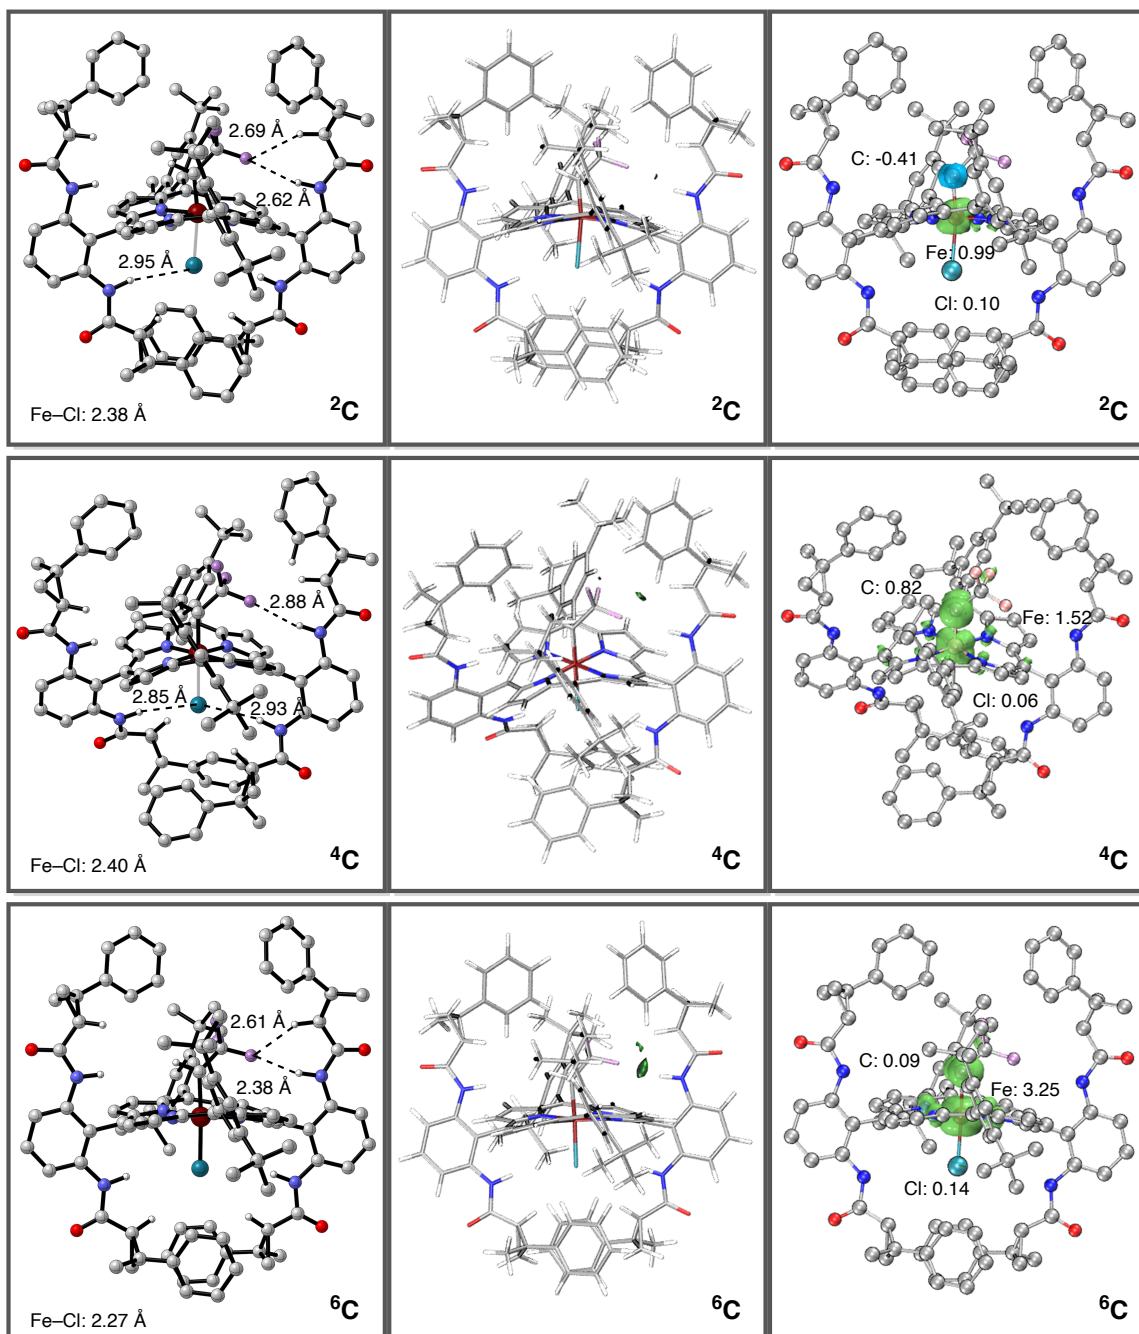



## Transition State 2

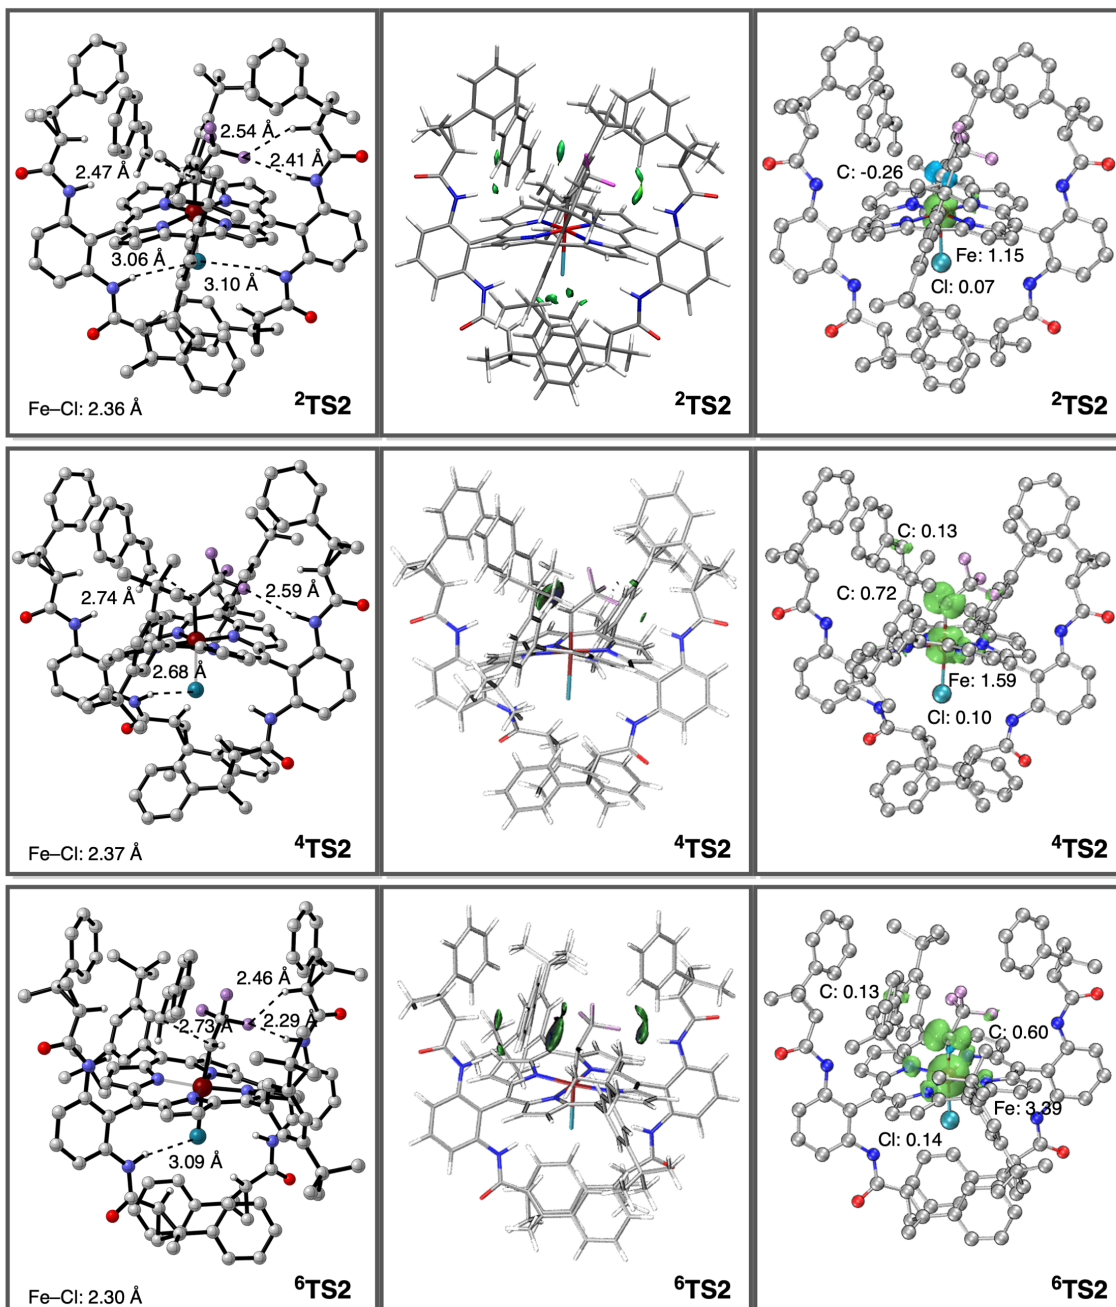

## Intermediate D

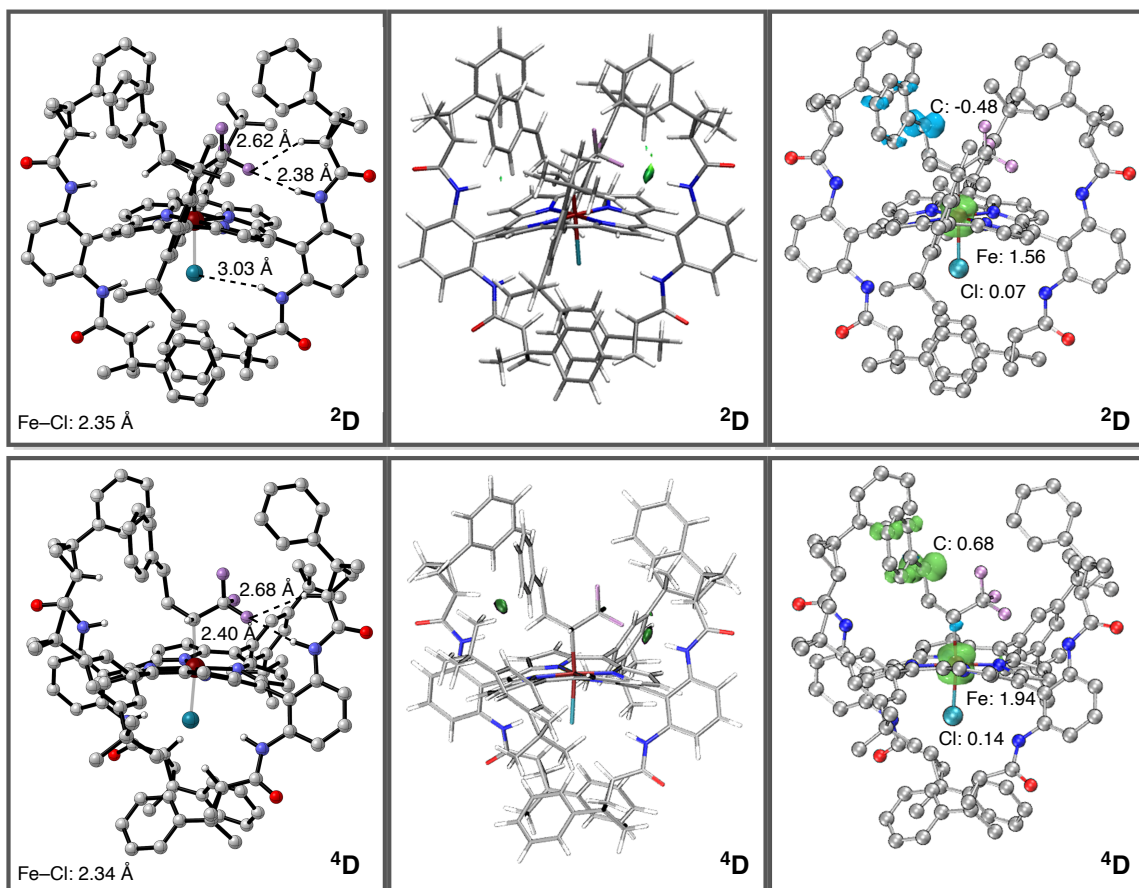

## Transition State 2

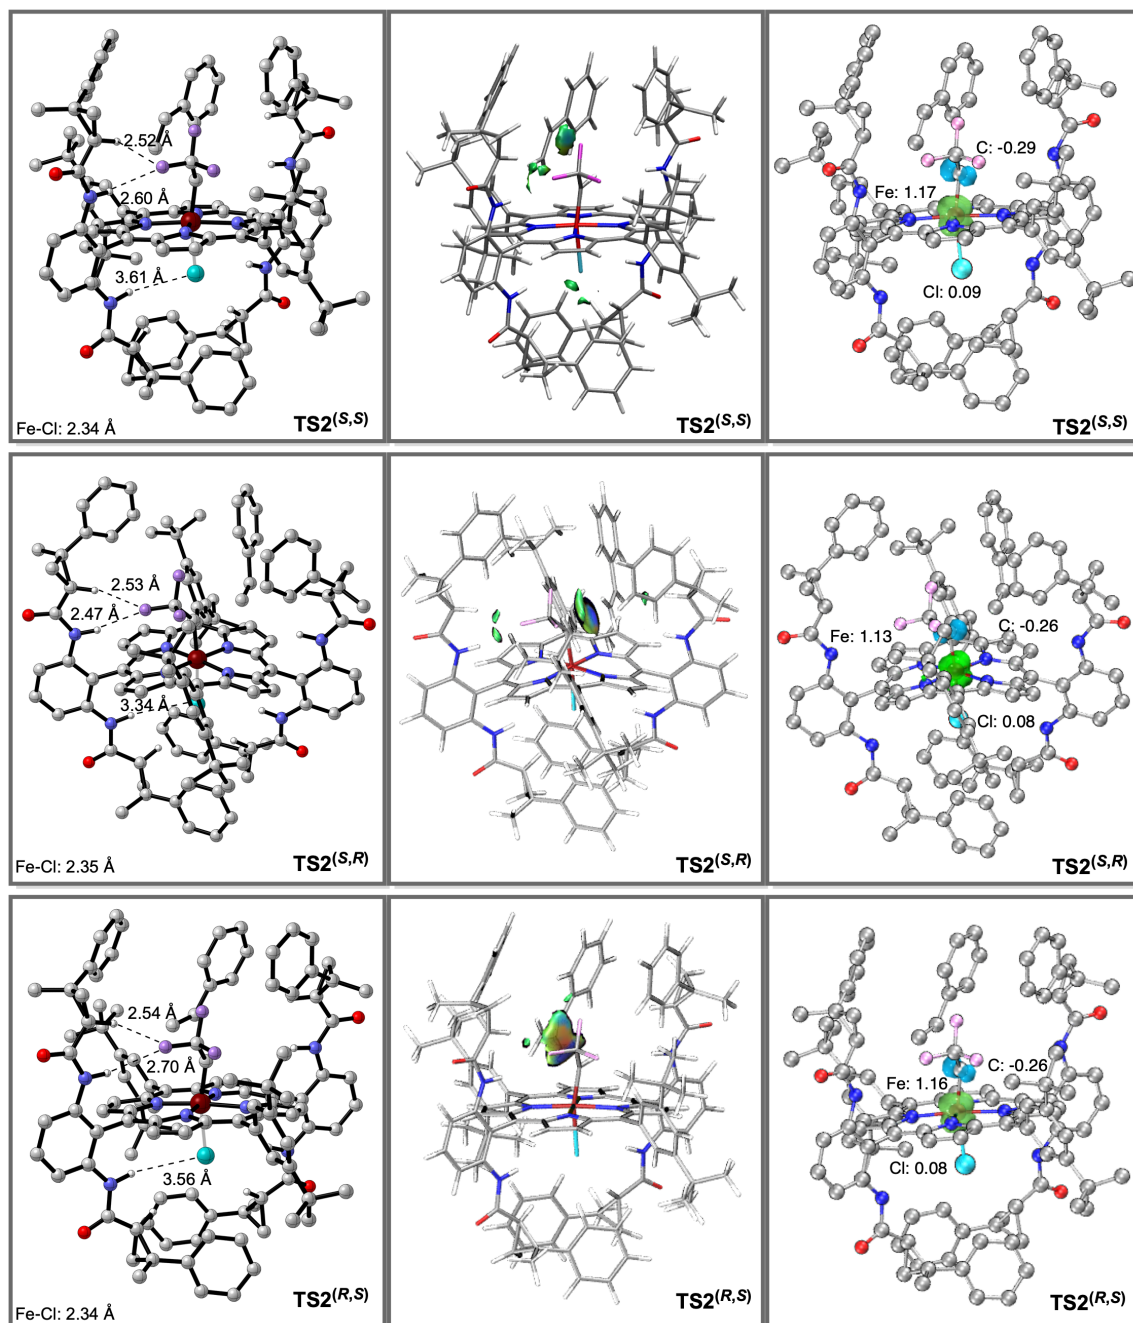

# Intermediate D

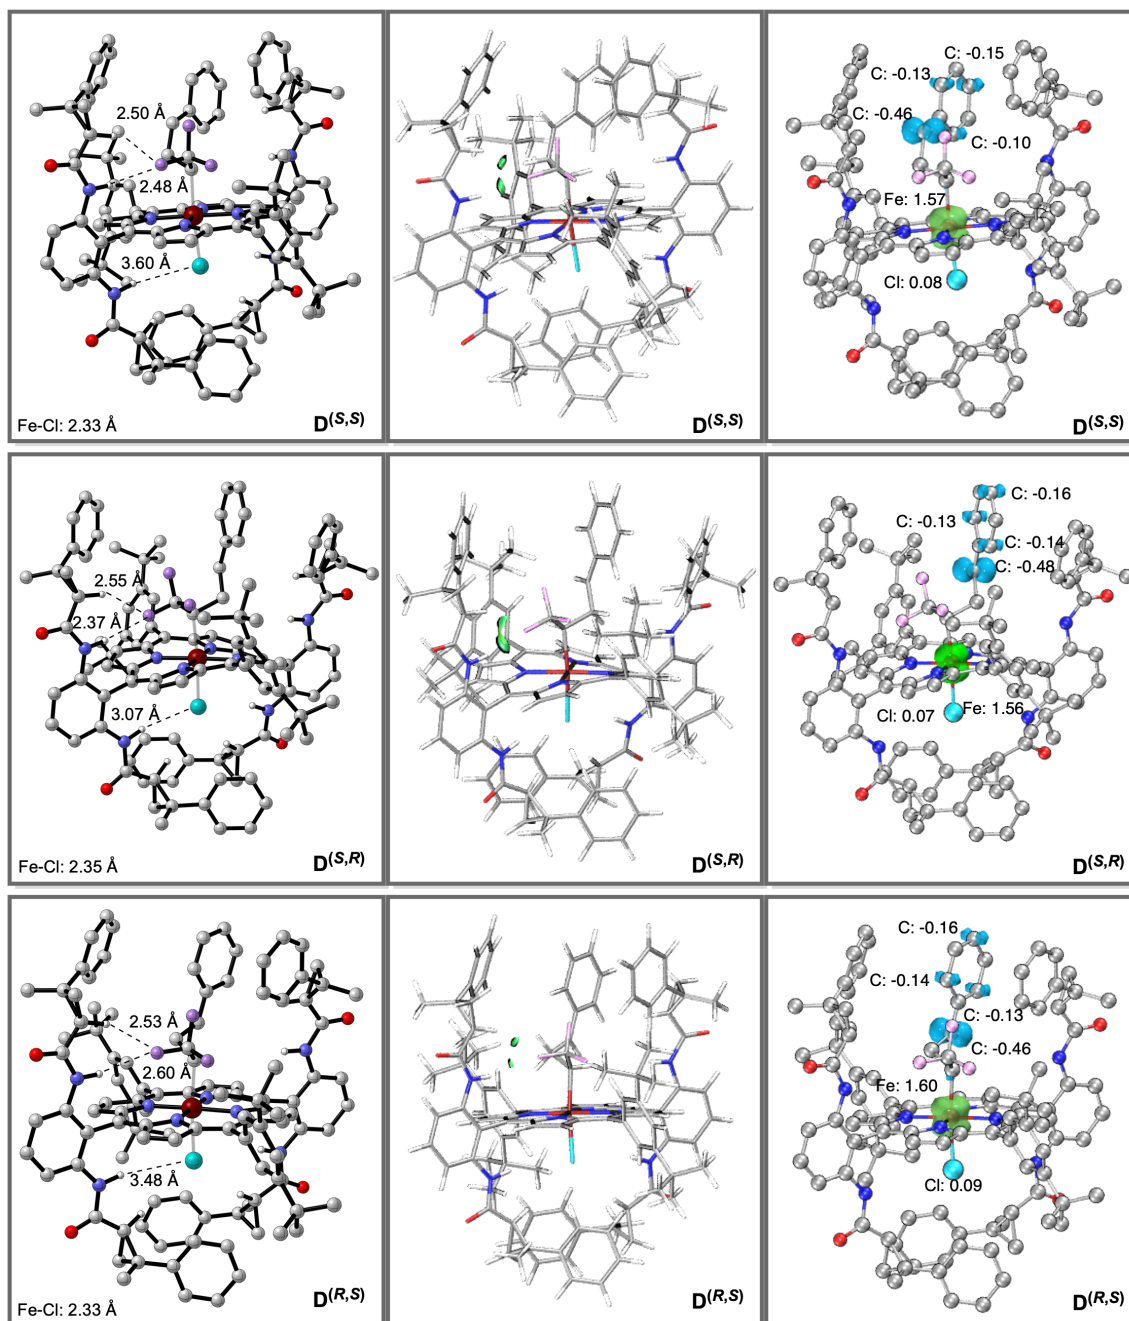

## Transition State 2'

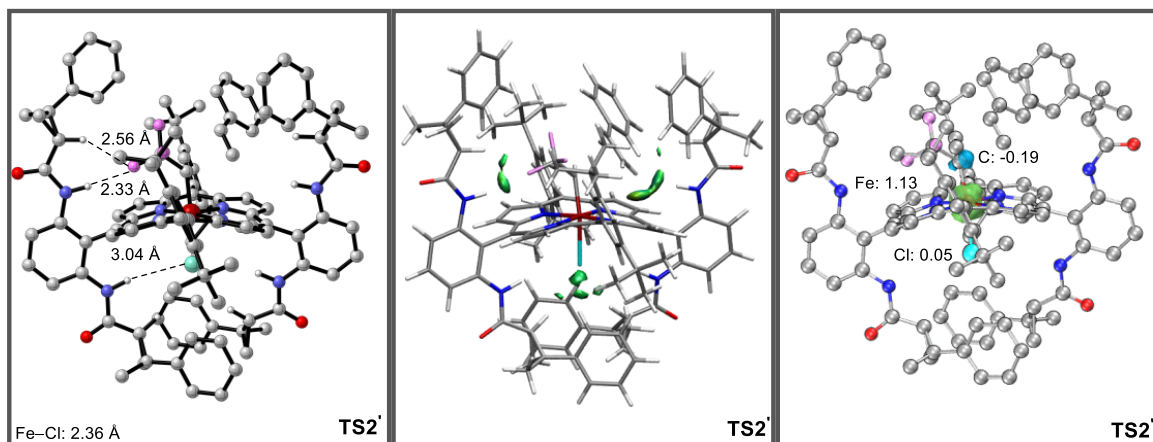

**Figure S40:** Calculated Energy Diagram for Cyclopropanation of Styrene (**2a**) with Diazo (**4b**) by  $[\text{Fe}(\text{P}3)\text{Cl}]$  through Radical Stepwise and Concerted Pathway

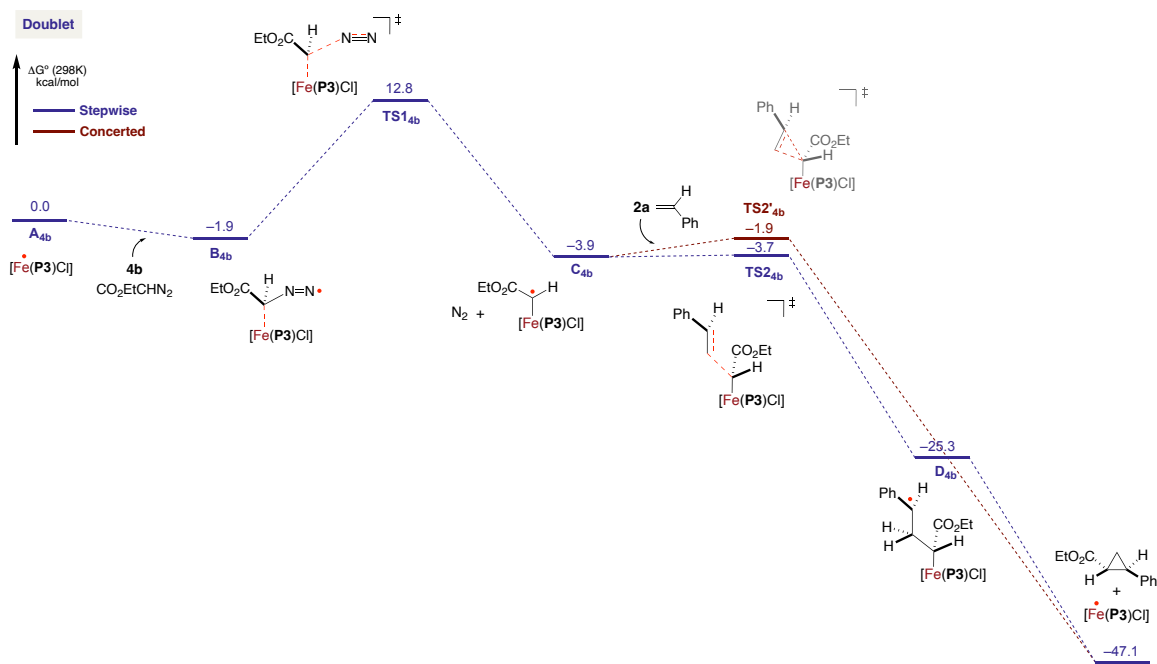

**Figure S41:** Optimized Structure Models, NCI Visual Representation and Spin Density Representation of Intermediates and Transition States (with **4b**)

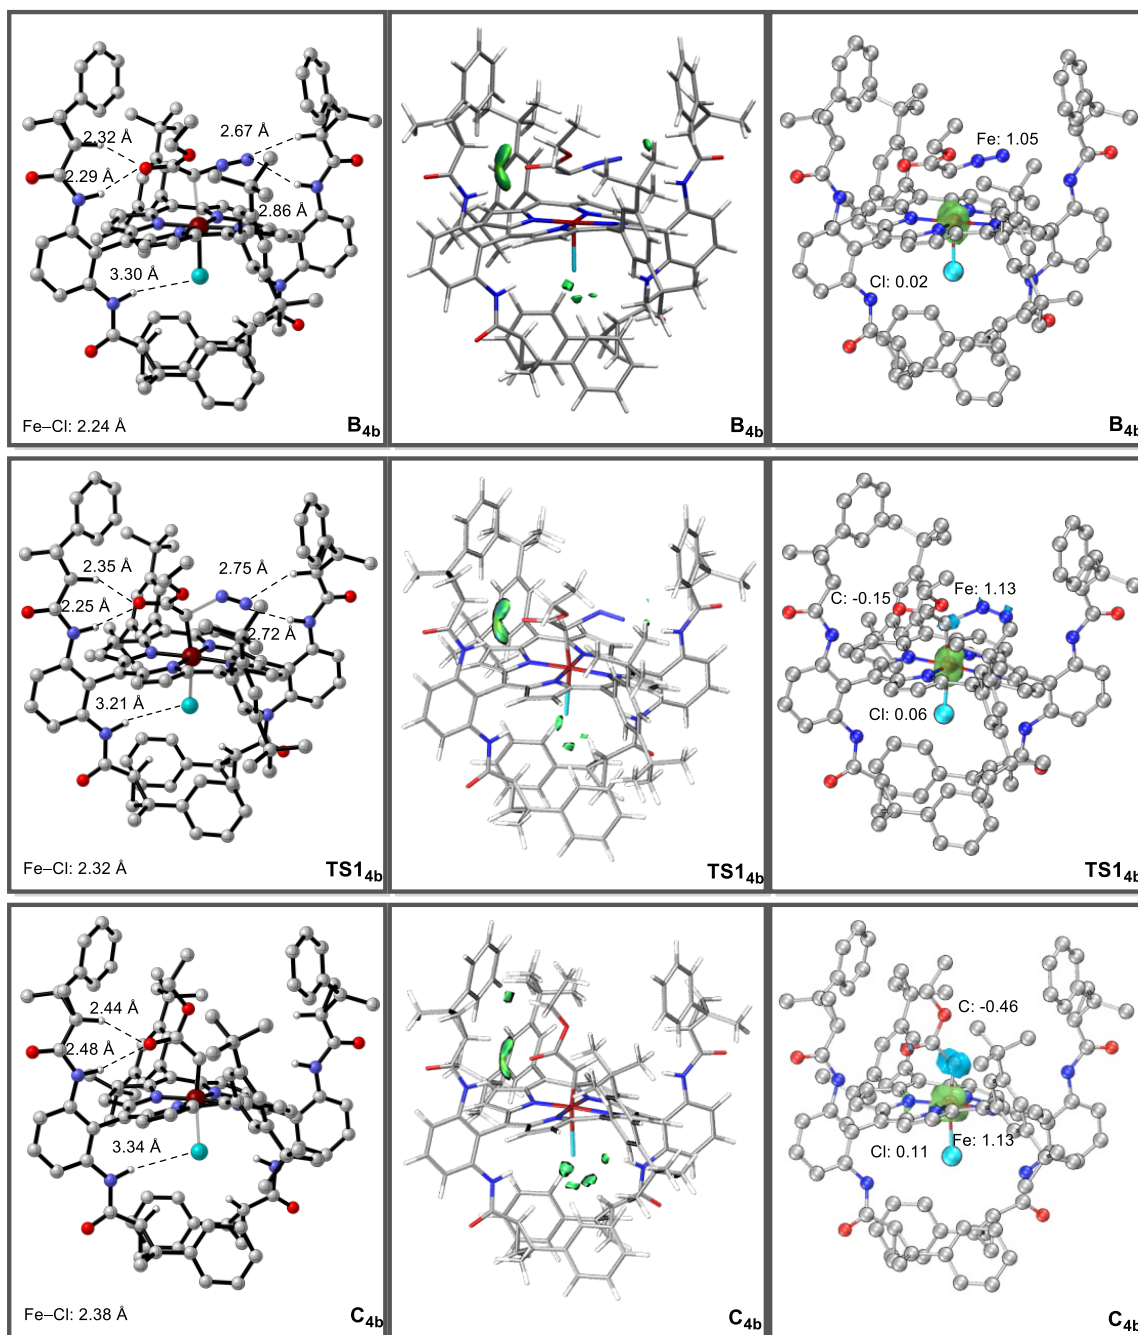

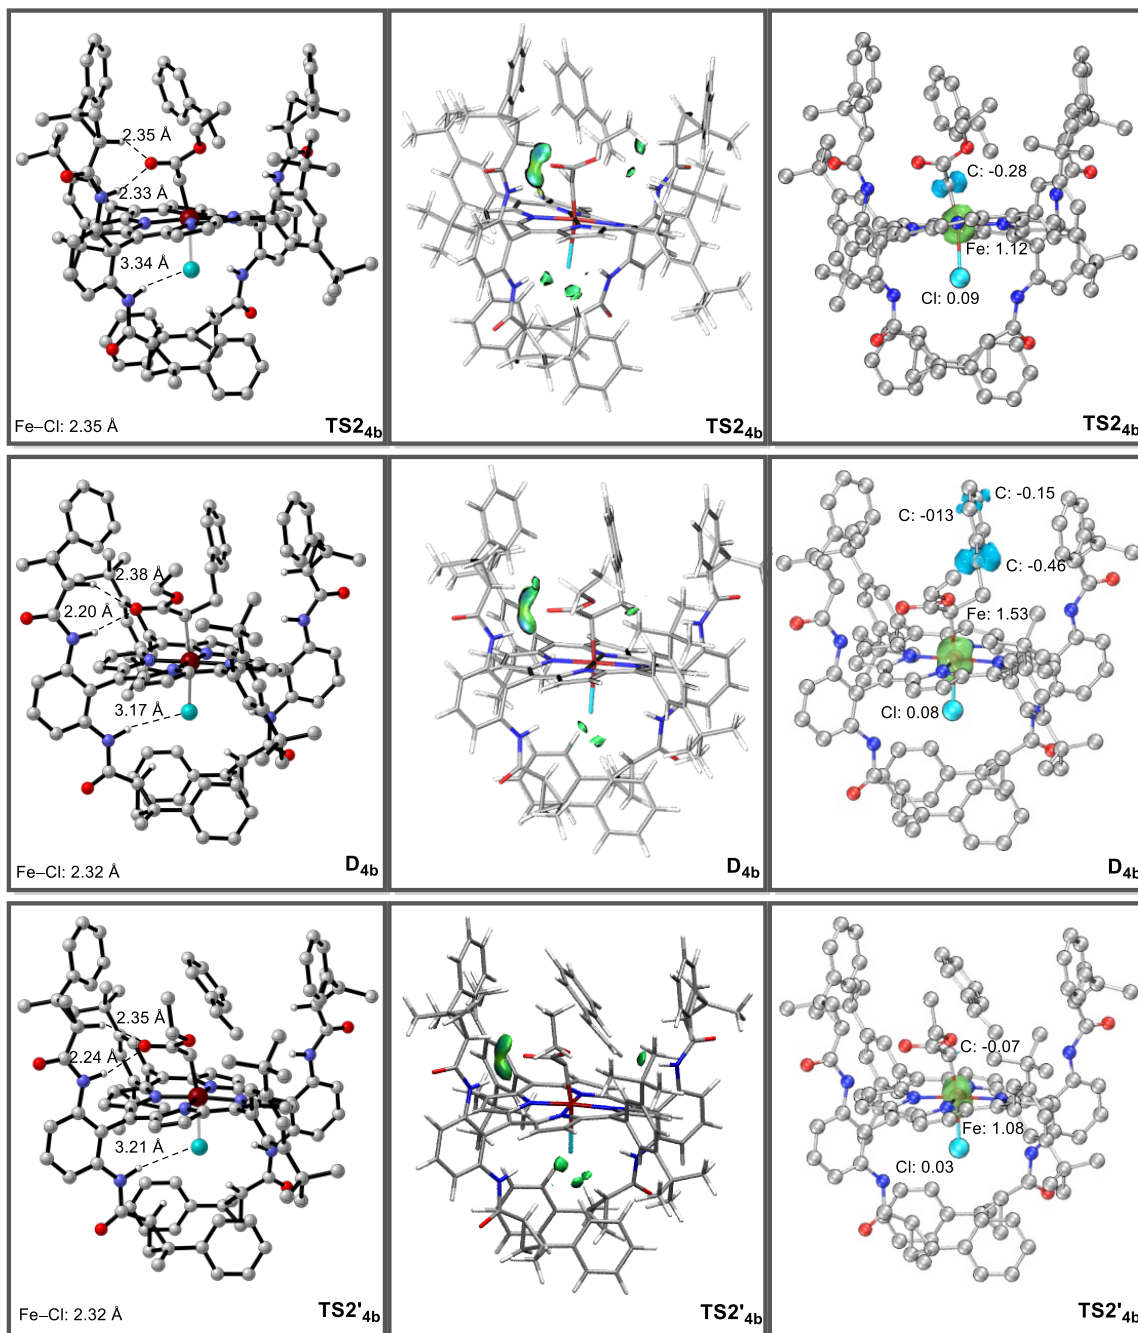



**Figure S42:** Calculated Energy Diagram for Cyclopropanation of Styrene (**2a**) with Diazo (**41'**) by  $[\text{Fe}(\text{P}3)\text{Cl}]$  through Radical Stepwise and Concerted Pathway

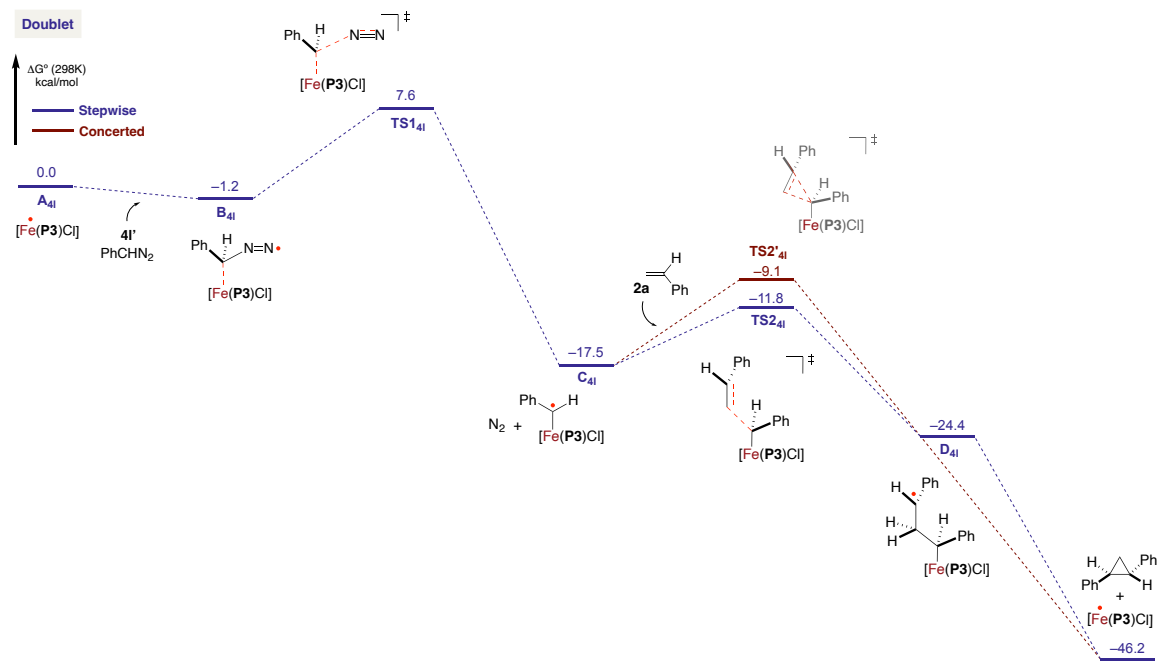

**Figure S43:** Optimized Structure Models, NCI Visual Representation and Spin Density Representation of Intermediates and Transition States (with **4I'**)

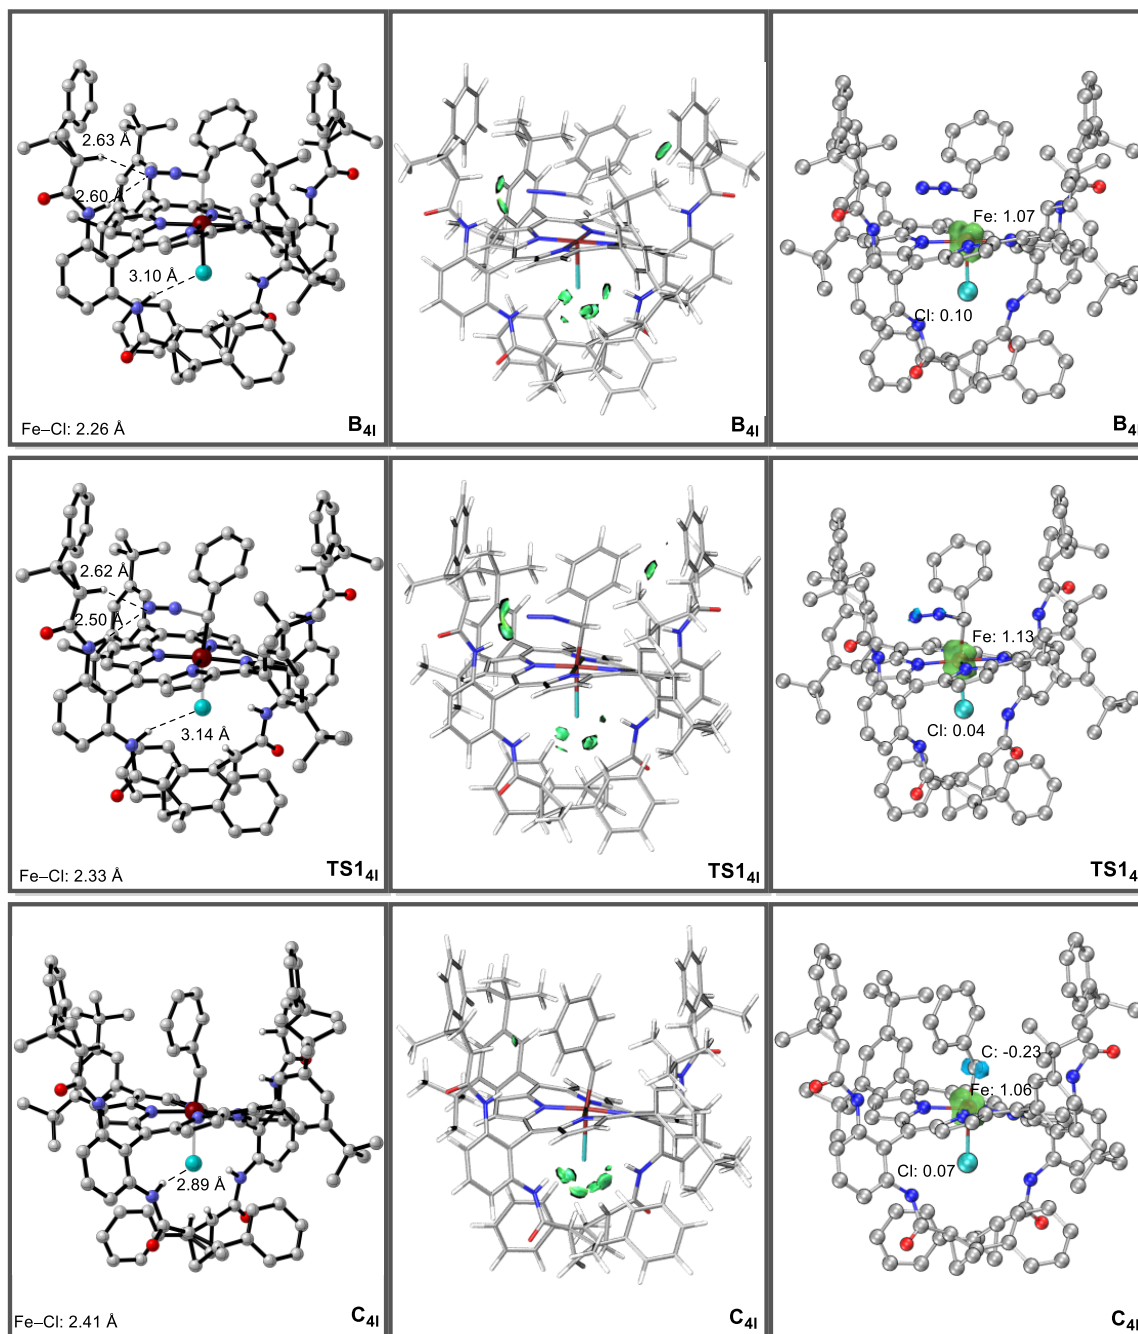

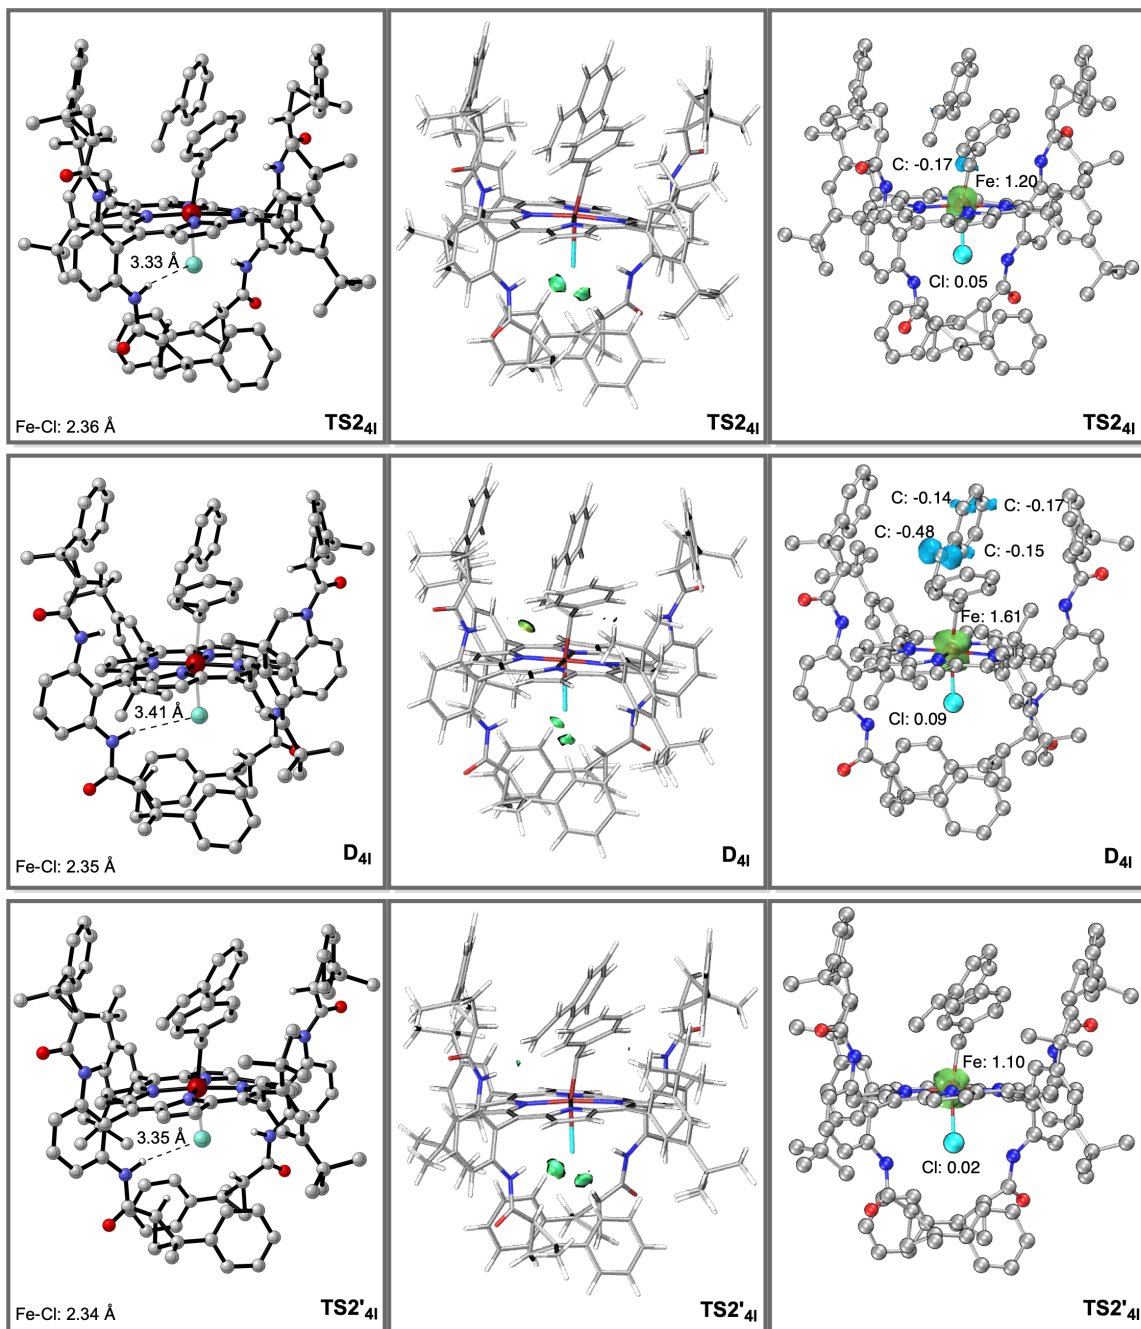

## 9. References

- (1) (a) Shirakawa, Y.; Yano, Y.; Niwa, Y.; Inabe, K.; Umezawa, N.; Kato, N.; Hisamatsu, Y.; Higuchi, T. *Inorg. Chem.* **2019**, *58*, 4268–4274. (b) Leeladee, P.; Baglia, R. A.; Prokop, K. A.; Latifi, R.; de Visser, S. P.; Goldberg, D. P. *J. Am. Chem. Soc.* **2012**, *134*, 10397–10400. (c) Gutzeit, F.; Dommaschk, M.; Levin, N.; Buchholz, A.; Schaub, E.; Plass, W.; Näther, C.; Herges, R. *Inorg. Chem.* **2019**, *58*, 12542–12546.
- (2) Bruker (2012). *APEX2*. Bruker AXS Inc., Madison, Wisconsin, USA.
- (3) Bruker (2012). SAINT. Data Reduction Software.
- (4) Sheldrick, G. M. (1996). *SADABS. Program for Empirical Absorption Correction*. University of Gottingen, Germany.
- (5) Farrugia L.J. *Appl. Cryst.* (1999). *32*, 837-838
- (6) Sheldrick, G.M. (2012 Beta) SHELXL-97. Program for the Refinement of Crystal
- (7) Sheldrick, G.M. (1990) *Acta Cryst.* A46, 467-473
- (8) Frisch, M. J. *et al.*, *Gaussian 16, Revision C01*, Gaussian, Inc., Wallingford CT, **2016**.
- (9) Schultz, N. E.; Zhao, Y.; Truhlar, D. G. *J. Phys. Chem. A* **2005**, *109*, 11127.
- (10) (a) Dzik, W. I.; Xu, X.; Zhang, X. P.; Reek, J. N. H.; de Bruin, B. *J. Am. Chem. Soc.* **2010**, *132*, 10891. (b) Lee, W.-C. C.; Wang, D.-S.; Zhang, C.; Xie, J.; Li, B.; Zhang, X. P. *Chem* **2021**, *7*, 1588.
- (11) Weigend, F. *Phys. Chem. Chem. Phys.* **2006**, *8*, 1057.
- (12) Weigend, F.; Ahlrichs, R. *Phys. Chem. Chem. Phys.* **2005**, *7*, 3297.
- (13) Page, M.; McIver, J. W. *J. Chem. Phys.* **1988**, *88*, 922.
- (14) Page, M.; Doubleday, C.; McIver, J. W. *J. Chem. Phys.* **1990**, *93*, 5634.
- (15) (a) Tao, J.; Perdew, J. P.; Staroverov, V. N.; Scuseria, G. E. *Phys. Rev. Lett.* **2003**, *91*, 146401. (b) Staroverov, V. N.; Scuseria, G. E.; Tao, J.; Perdew, J. P. *J. Chem. Phys.* **2003**, *119*, 12129-12137. (c) Staroverov, V. N.; Scuseria, G. E.; Tao, J.; Perdew, J. P. *J. Chem. Phys.* **2004**, *121*, 11507-11507.
- (16) Grimme, S.; Antony, J.; Ehrlich, S.; Krieg, H. *J. Chem. Phys.* **2010**, *132*, 154104.
- (17) Marenich, A. V.; Cramer, C. J.; Truhlar, D. G. *J. Phys. Chem. B* **2009**, *113*, 6378.
- (18) Lefebvre, C.; Rubez, G.; Khartabil, H.; Boisson, J.-C.; Contreras-Garcia, J.; Henon, E. *Phys. Chem. Chem. Phys.* **2017**, *19*, 17928.
- (19) Lu, T.; Chen, F. *J. Comput. Chem.* **2012**, *33*, 580.
- (20) Humphrey, W.; Dalke, A.; Schulten, K. *J. Mol. Graph.* **1996**, *14*, 33.
- (21) Legault, C. Y. CYLview, 1.0b (Universite de Sherbrooke, Quebec, Montreal, Canada, 2009)

## 10. NMR/HPLC Spectra

$^1\text{H}$  NMR of **1** in  $\text{DMSO-}d_6$

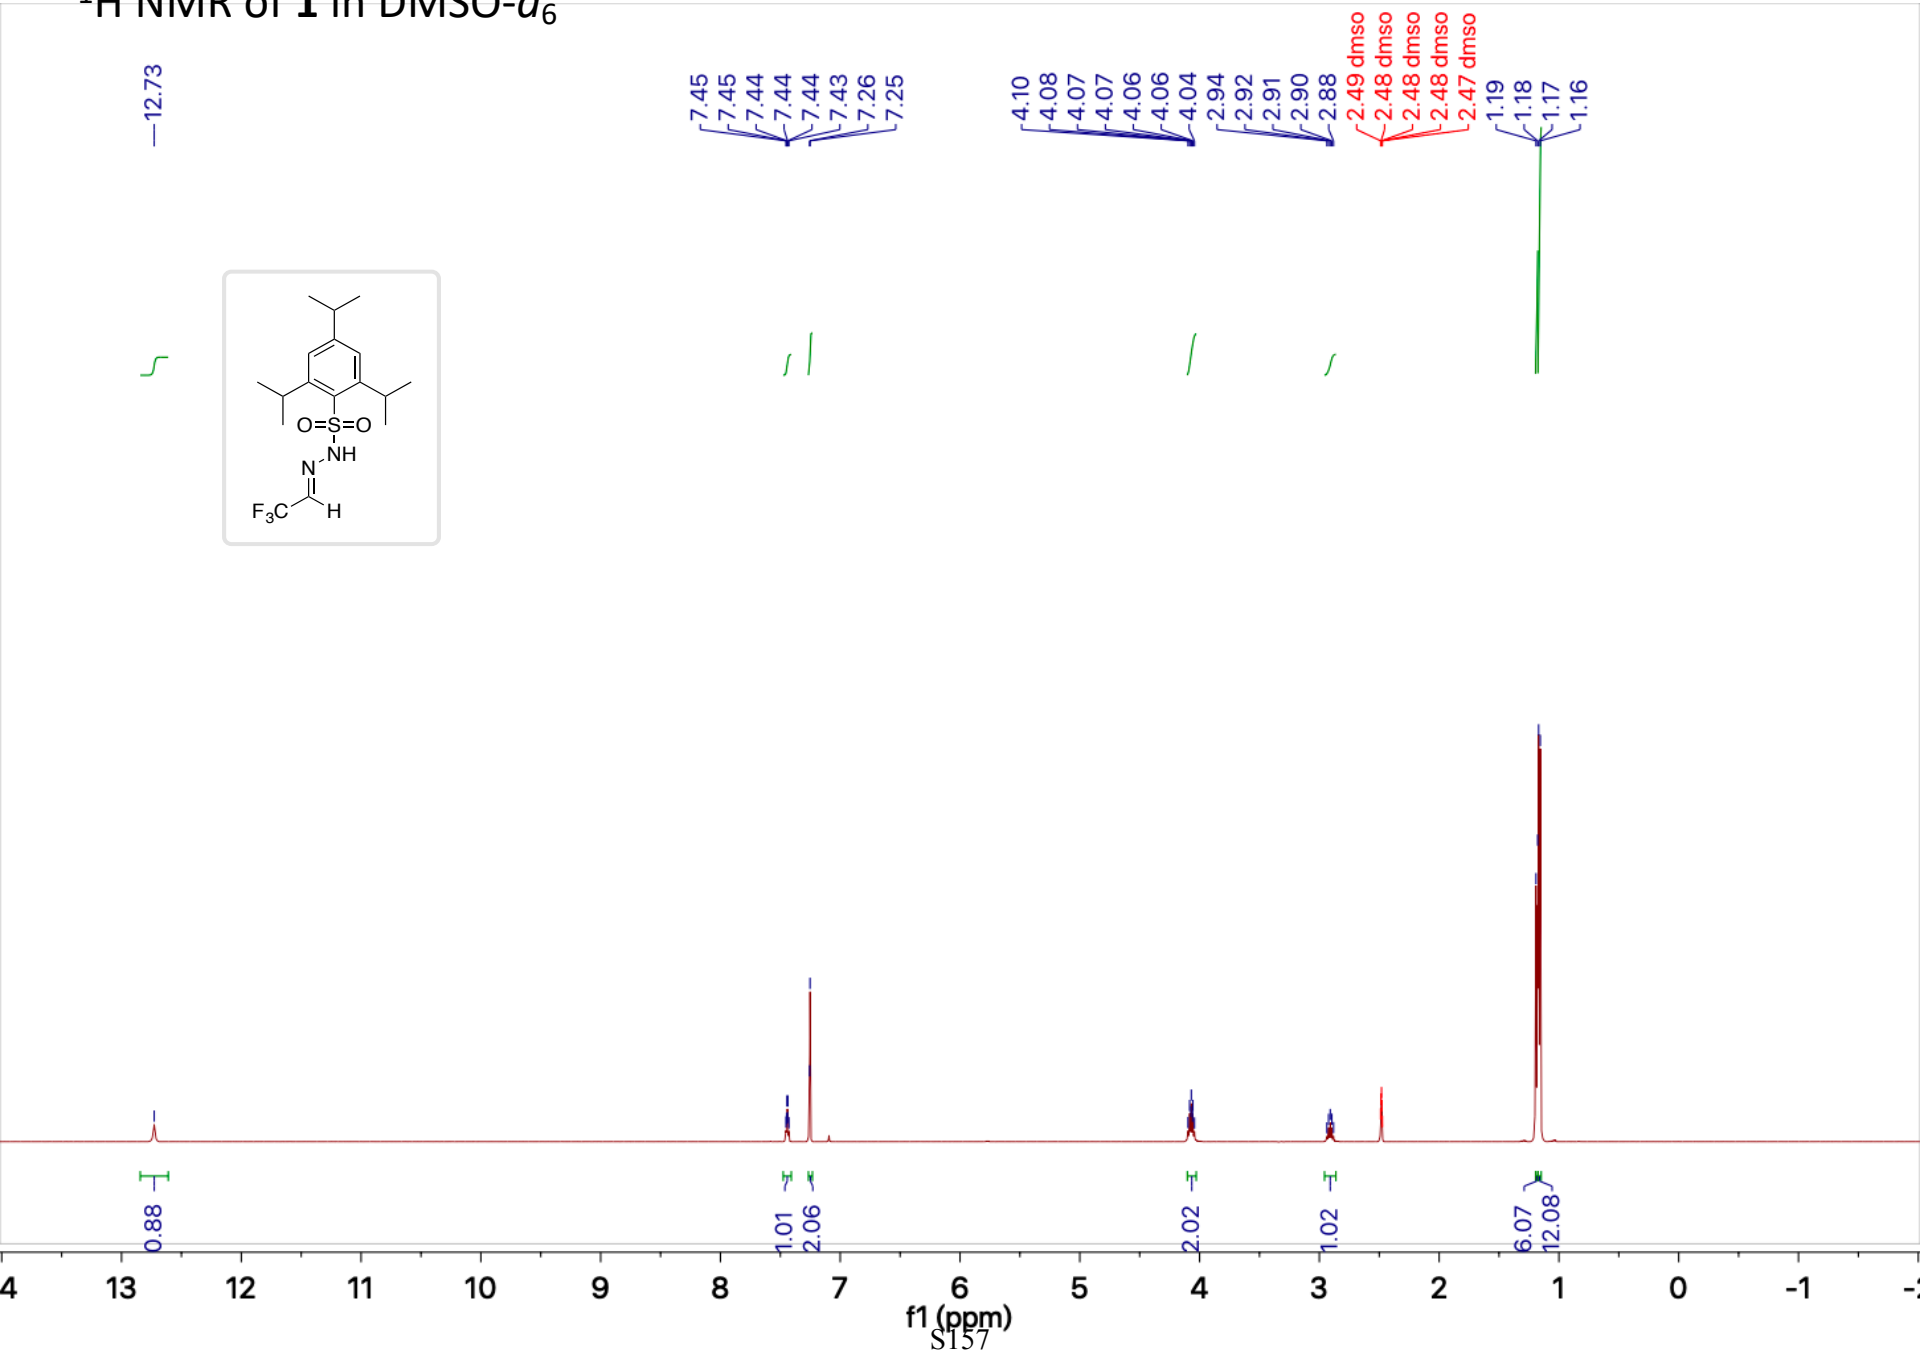

$^{13}\text{C}$  NMR of **1** in  $\text{DMSO-}d_6$

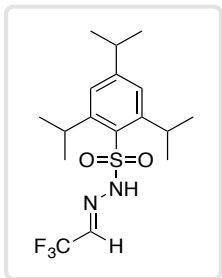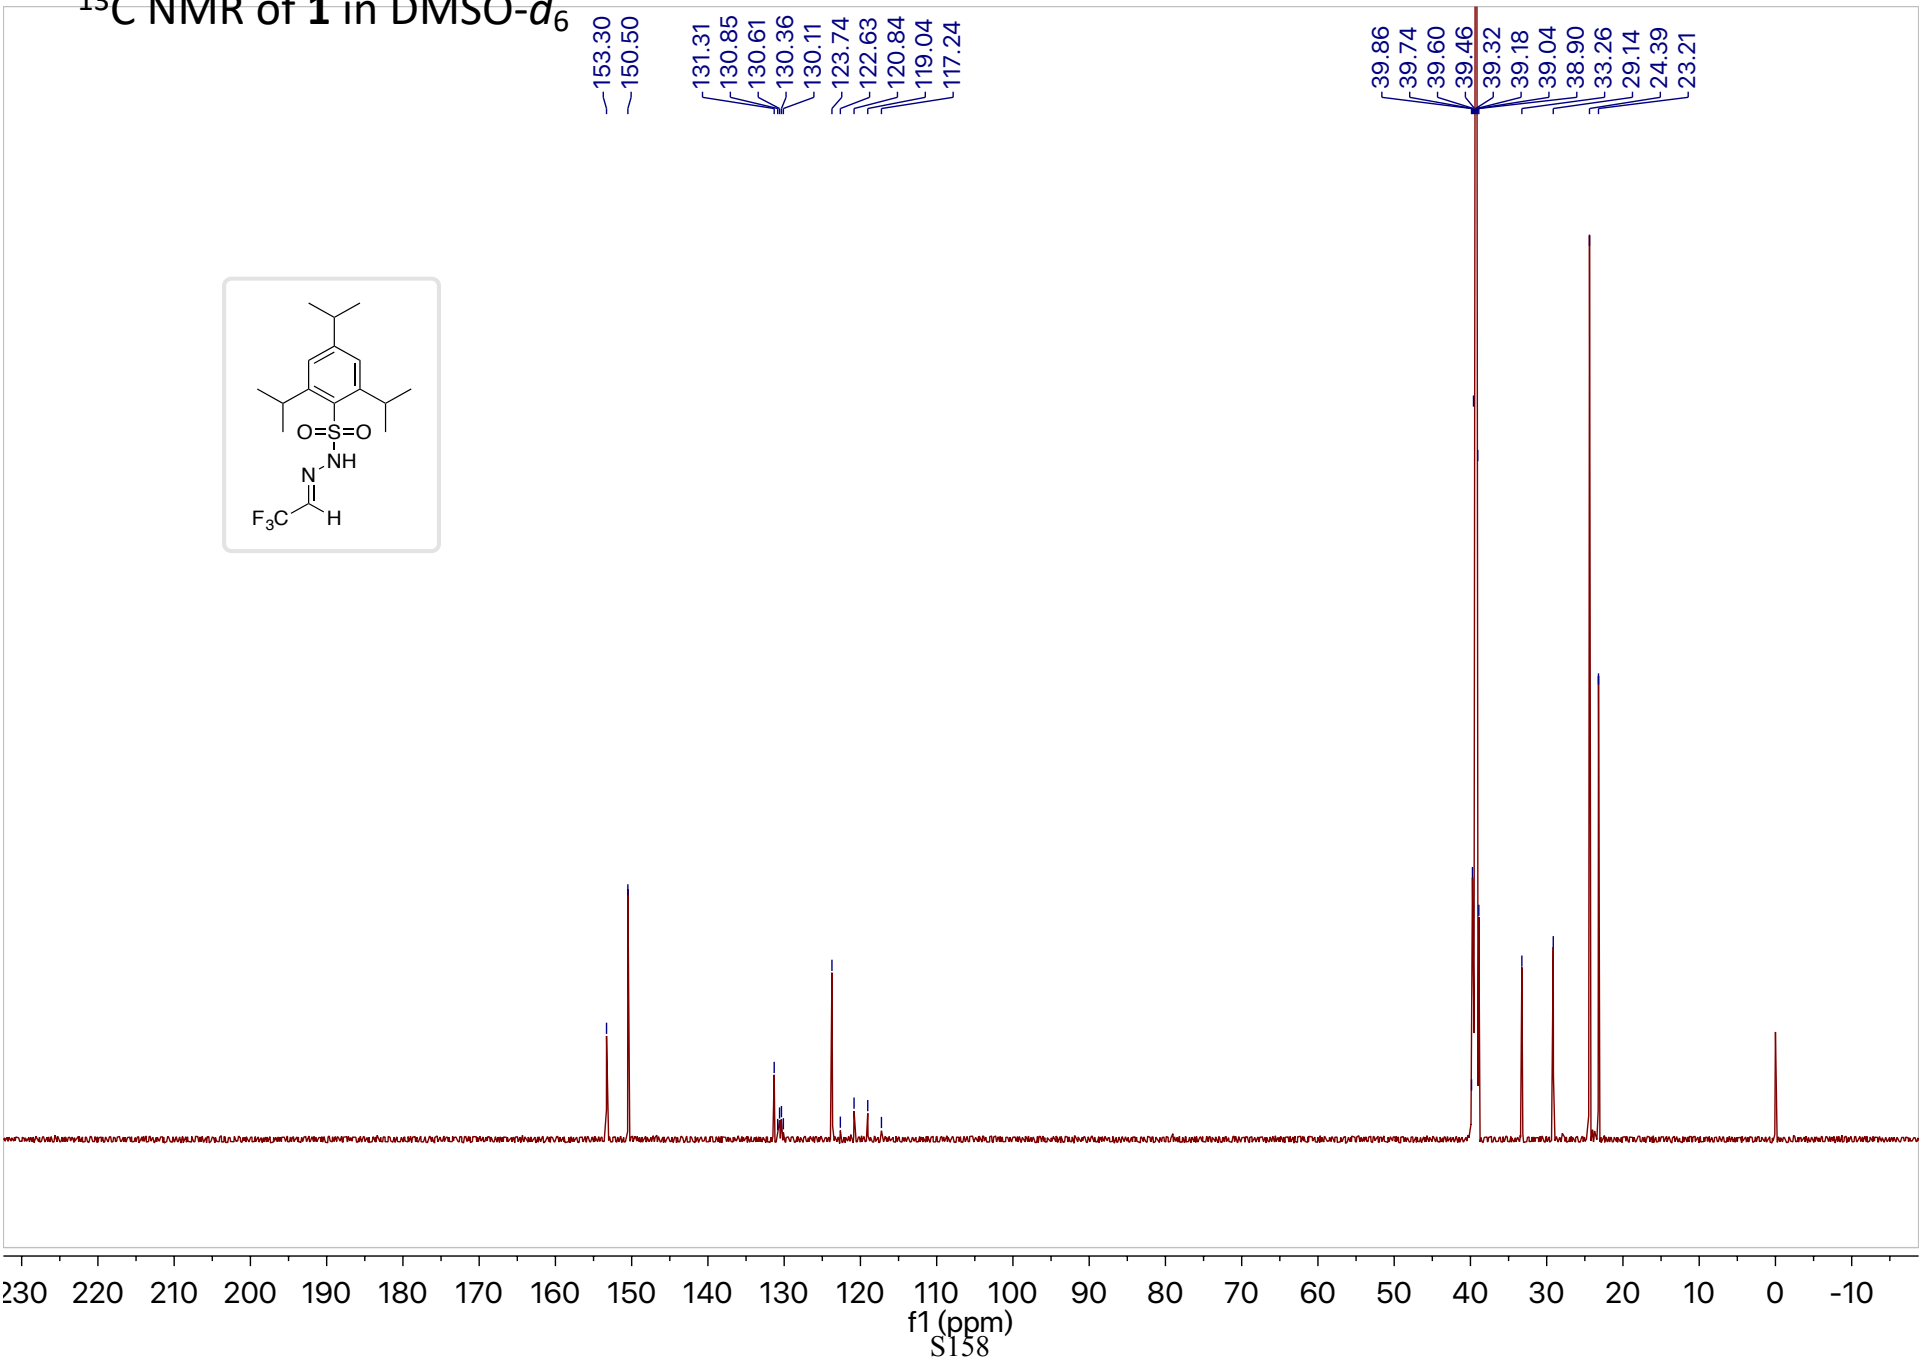

$^{19}\text{F}$  NMR of **1** in  $\text{DMSO-}d_6$

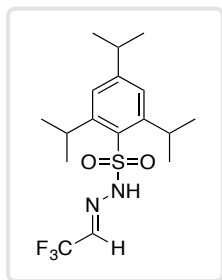

-66.19  
-66.20

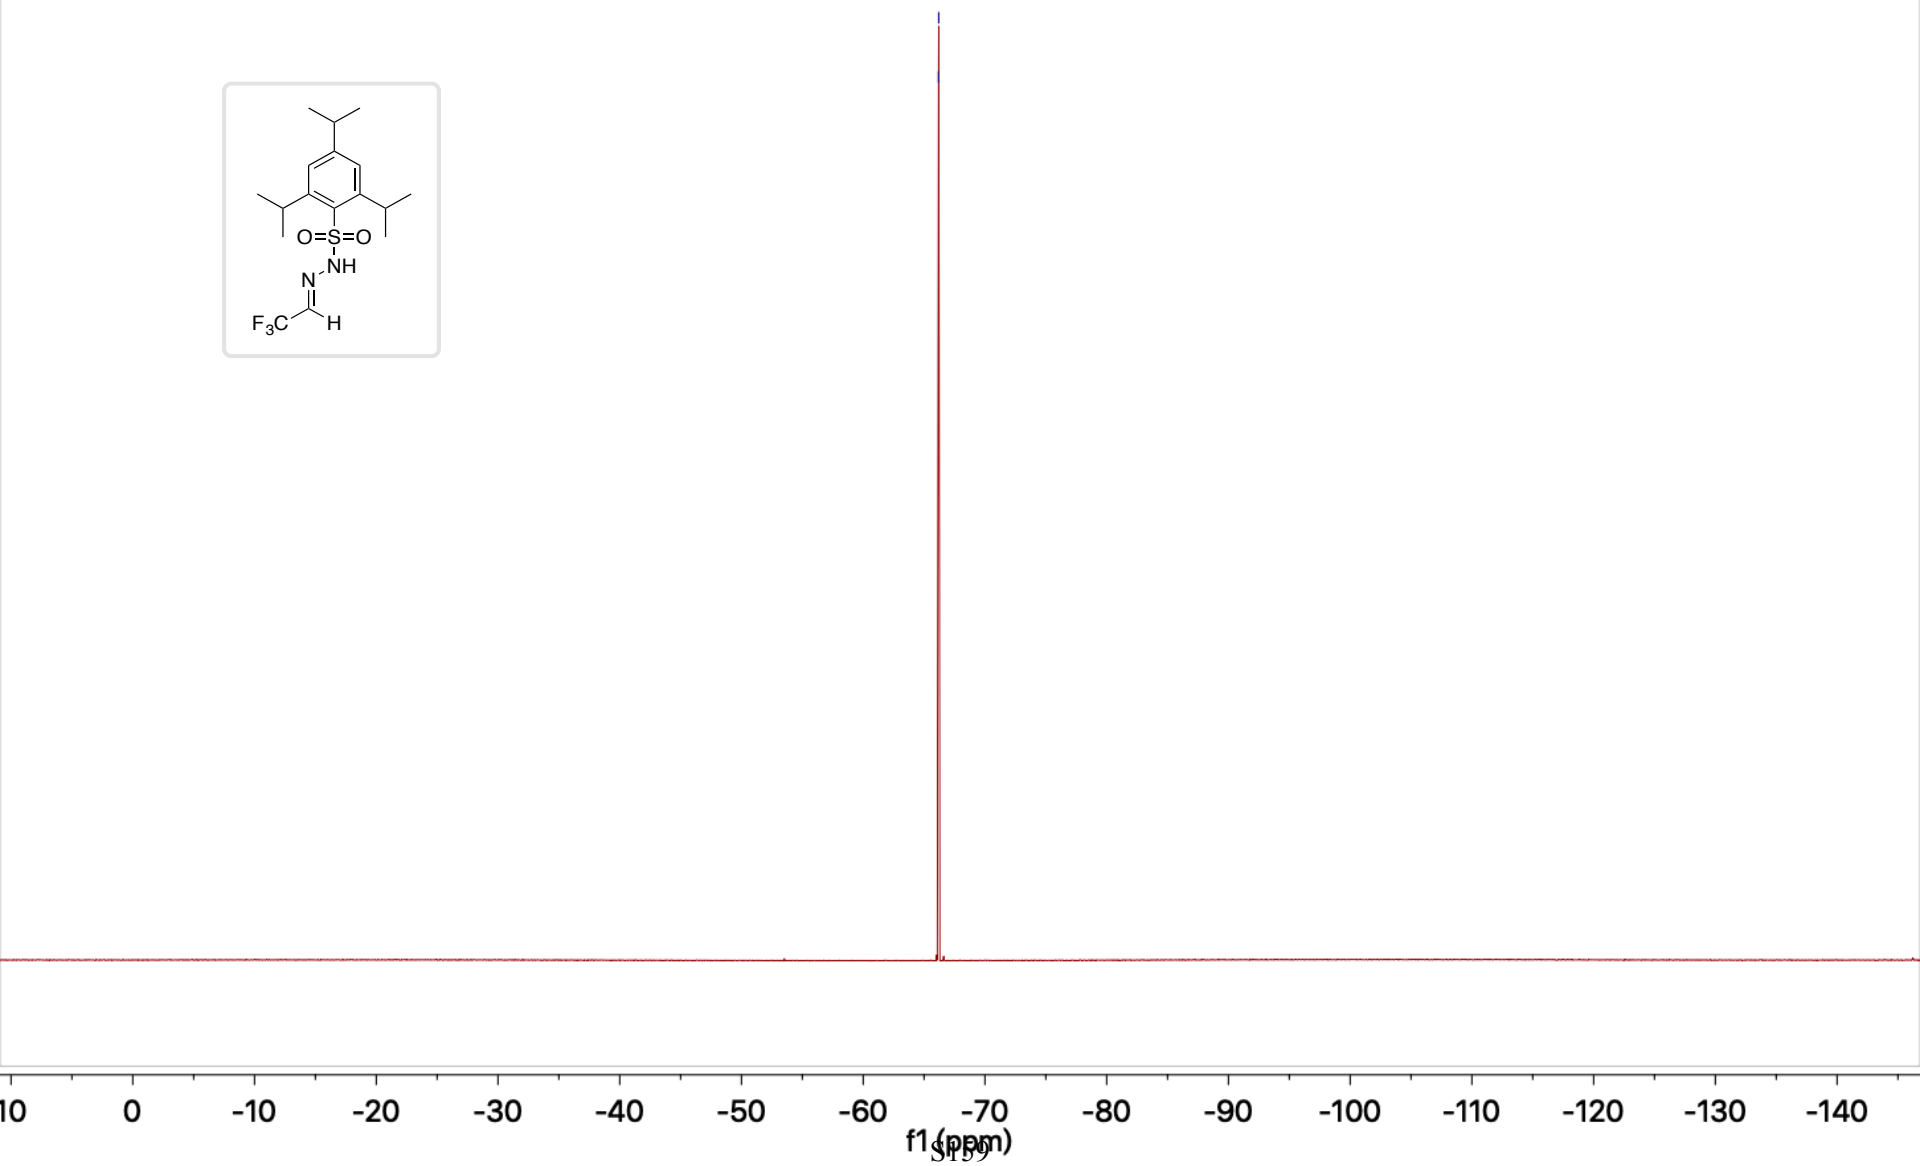



$^1\text{H}$  NMR of **4a** in  $\text{DMSO-}d_6$

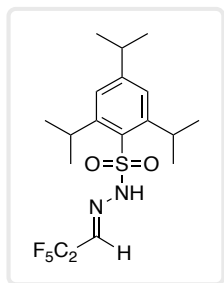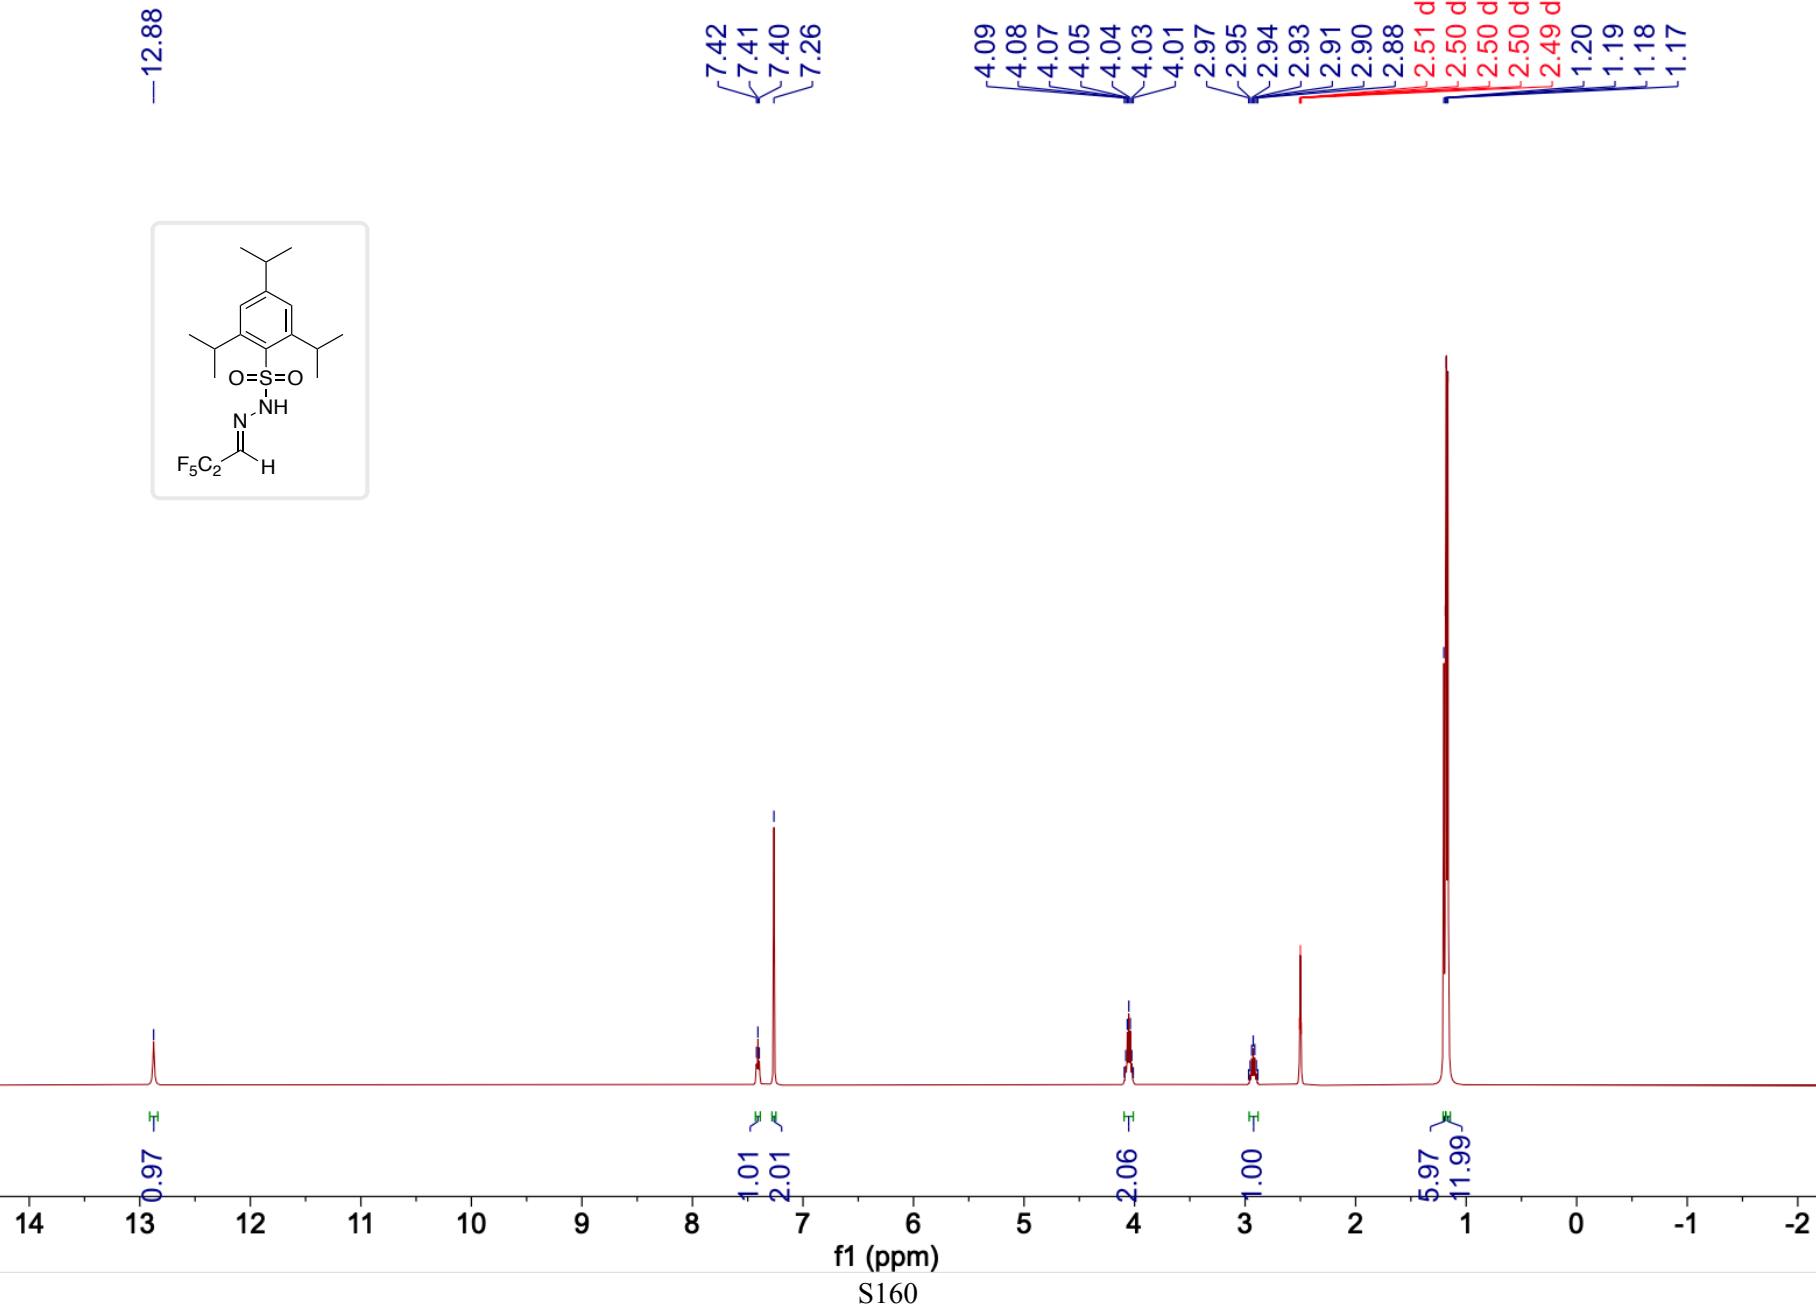

<sup>13</sup>C NMR of **4a** in DMSO-*d*<sub>6</sub>

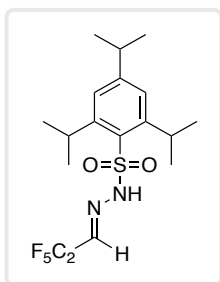

153.46  
150.56  
131.13  
129.67  
129.44  
129.21  
123.74  
121.32  
119.44  
119.15  
118.85  
117.16  
116.87  
116.58  
114.60  
111.85  
111.56  
109.86  
109.56  
107.87  
107.57

40.02 DMSO  
39.85 DMSO  
39.69 DMSO  
39.52 DMSO  
39.35 DMSO  
39.19 DMSO  
39.02 DMSO  
33.36  
29.17  
24.41  
23.29

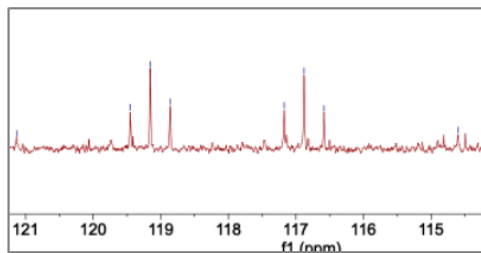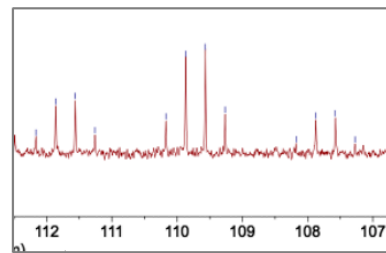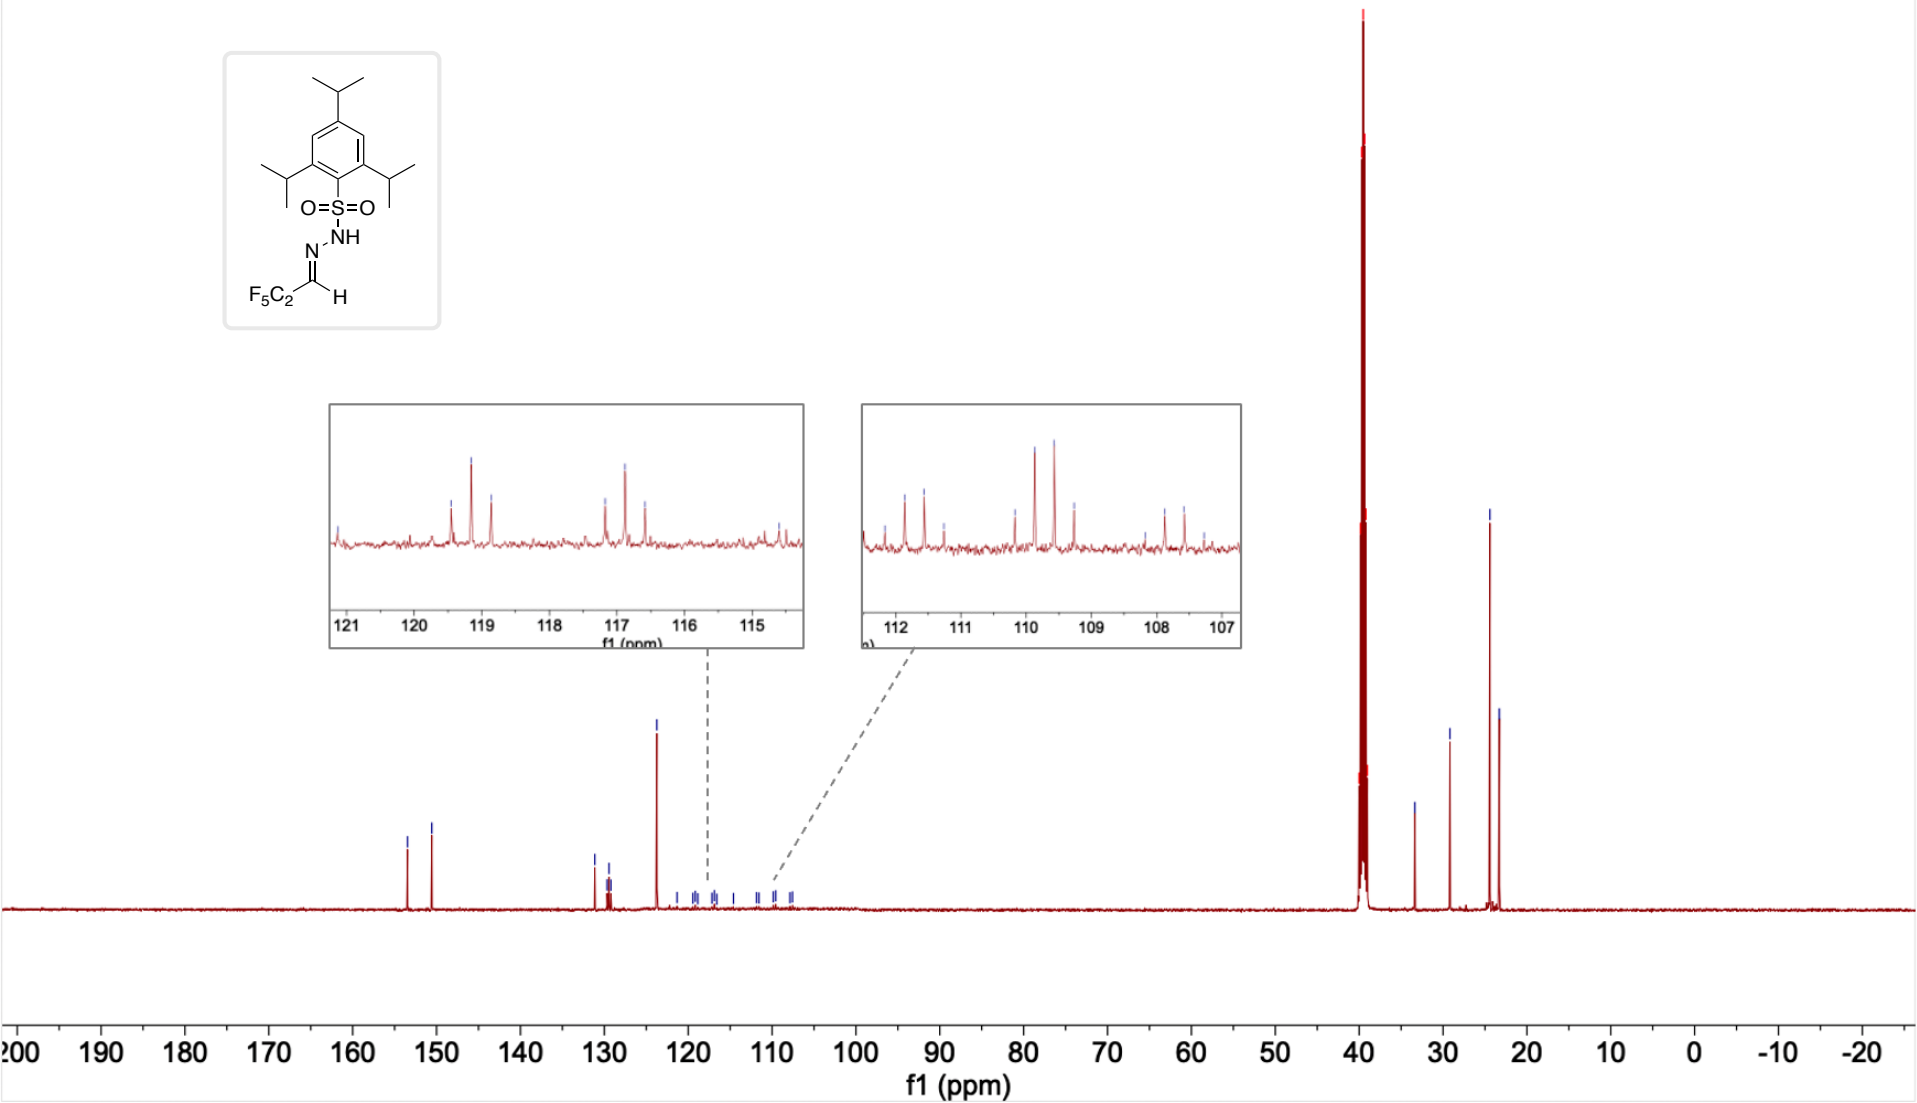

$^{19}\text{F}$  NMR of **4a** in  $\text{DMSO-}d_6$

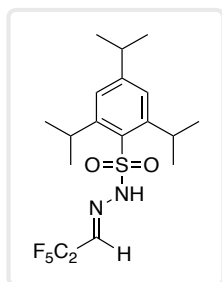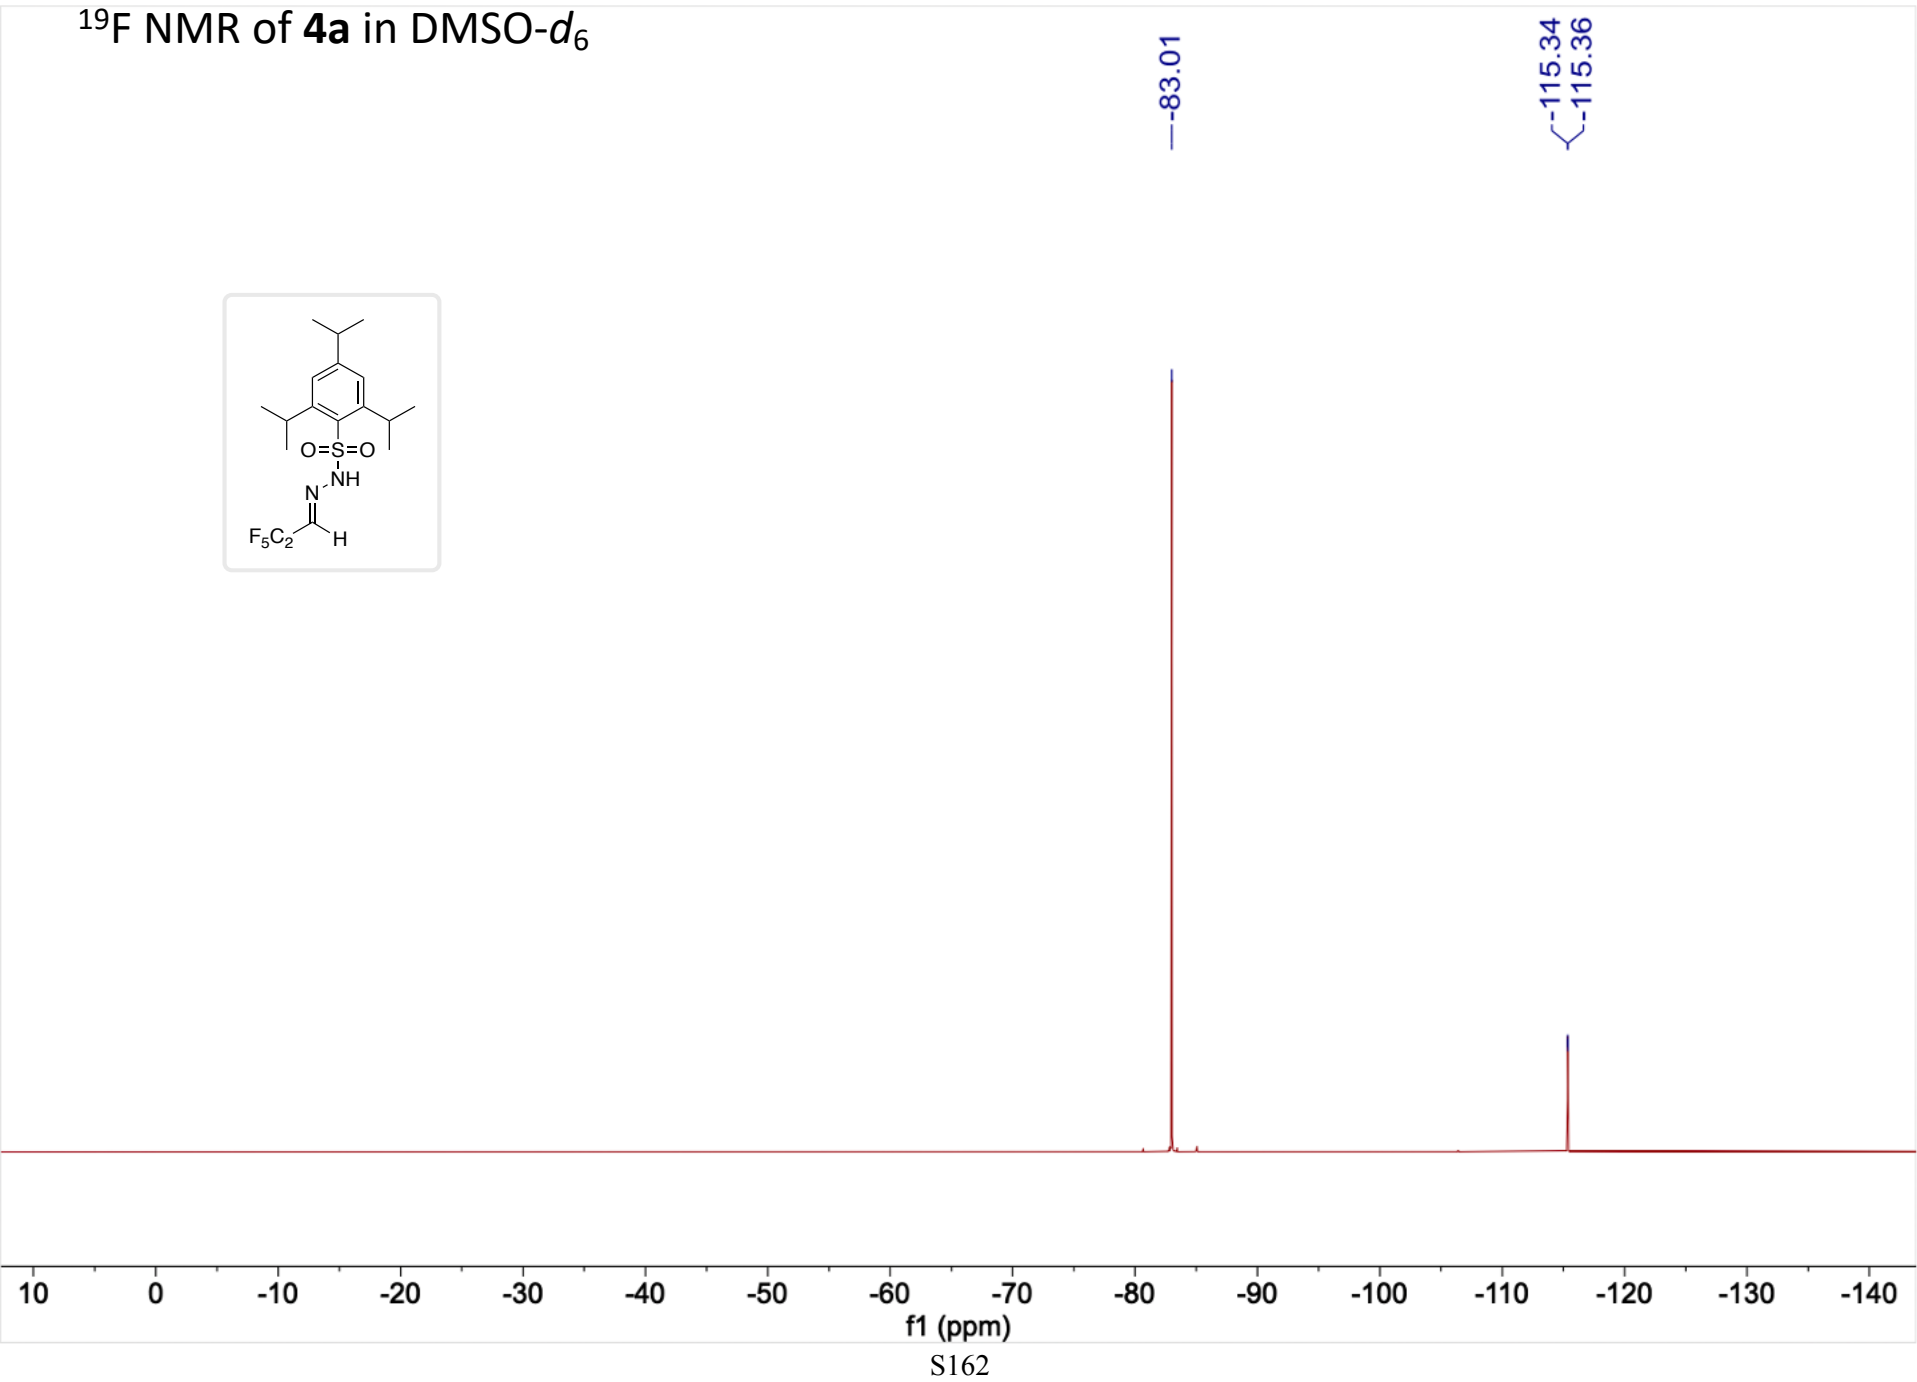

<sup>1</sup>H NMR of **3a**  
in Chloroform-*d*

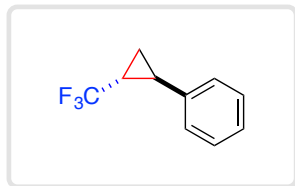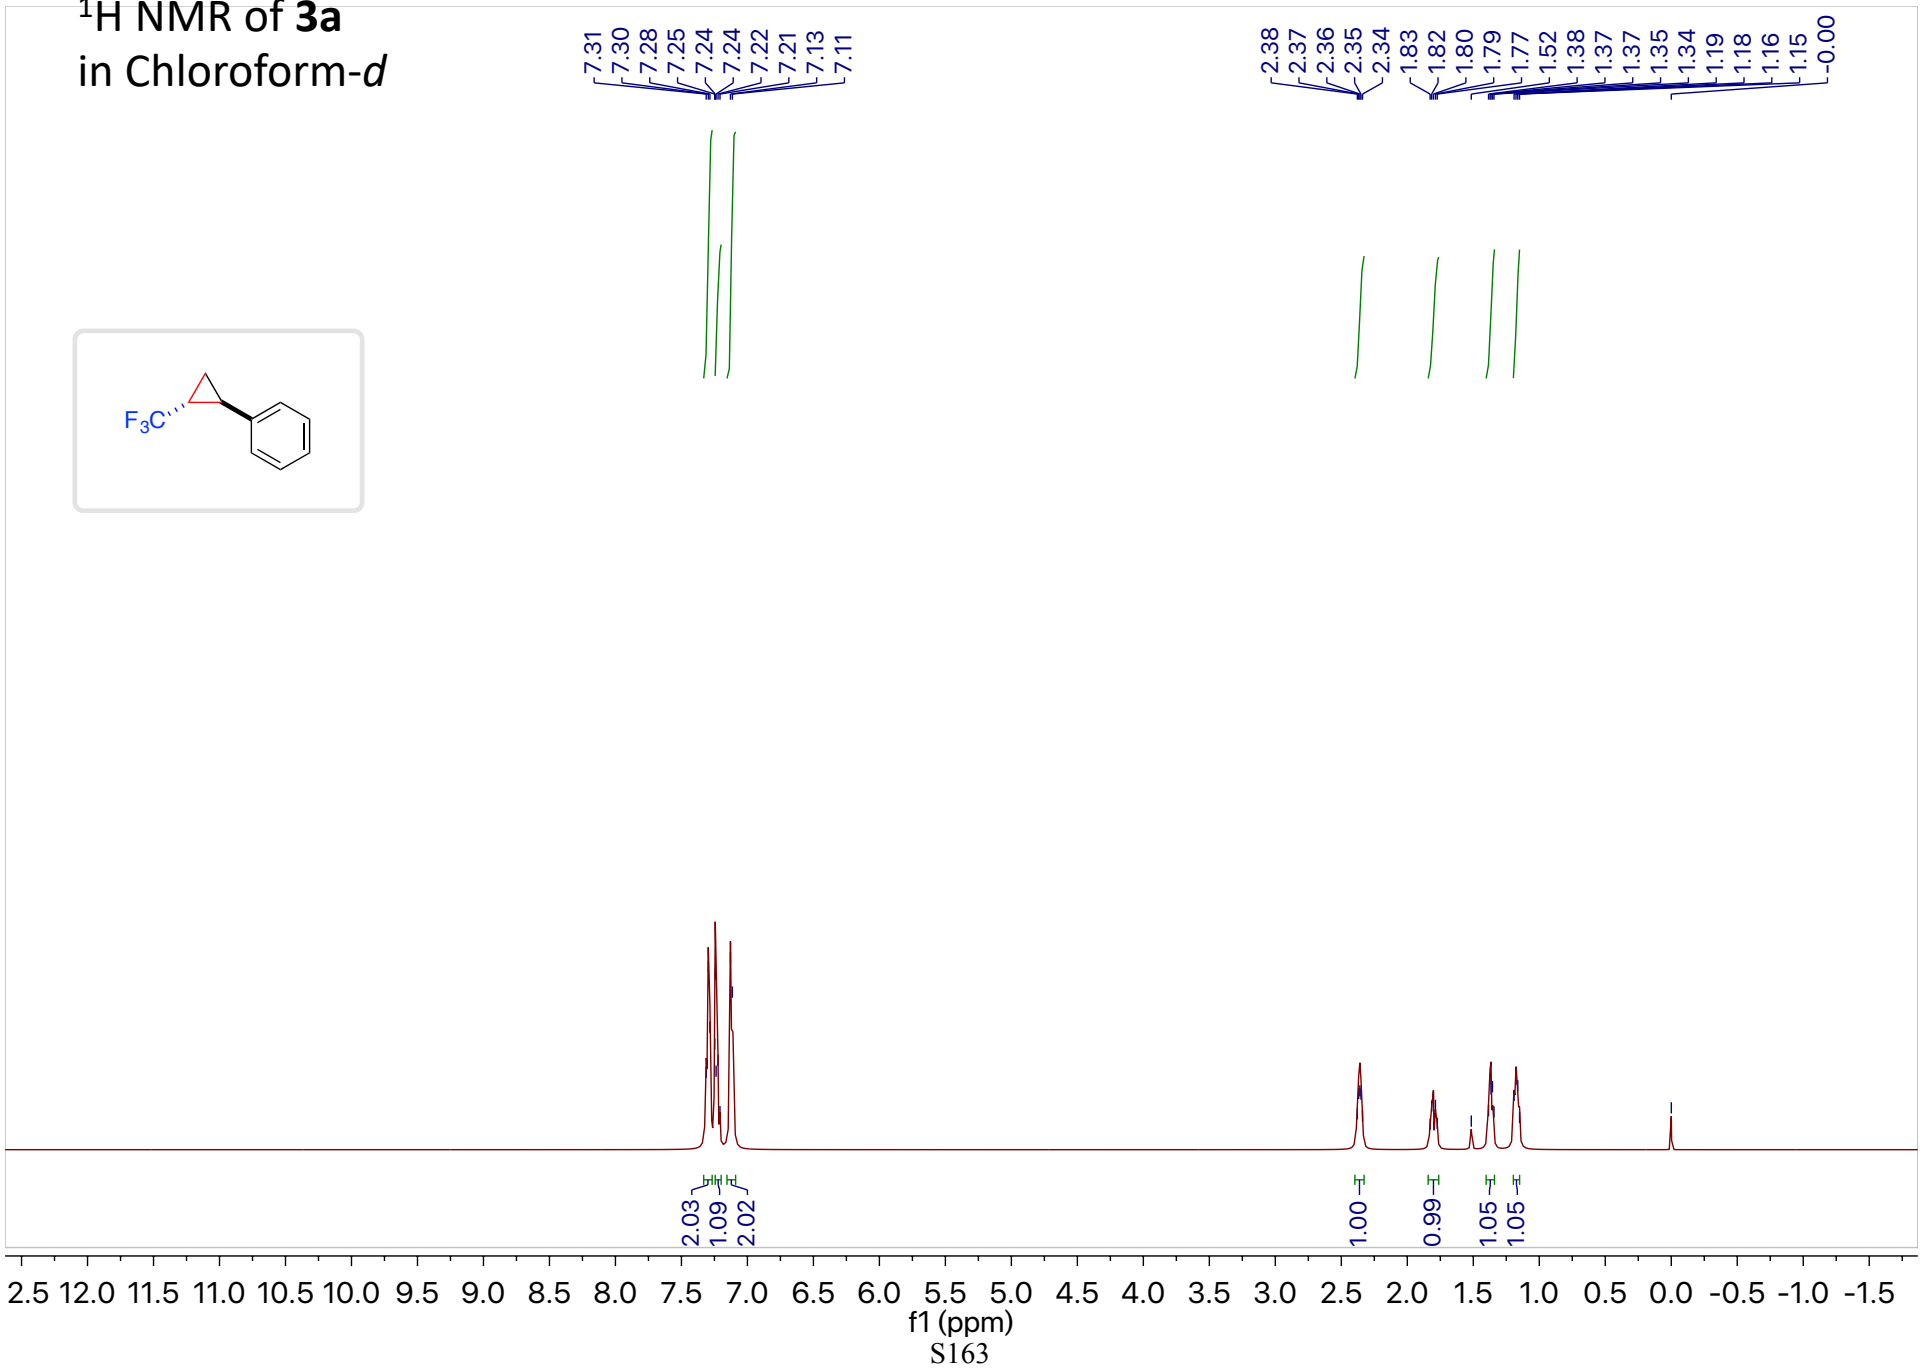

$^{13}\text{C}$  NMR of **3a**  
in Chloroform-*d*

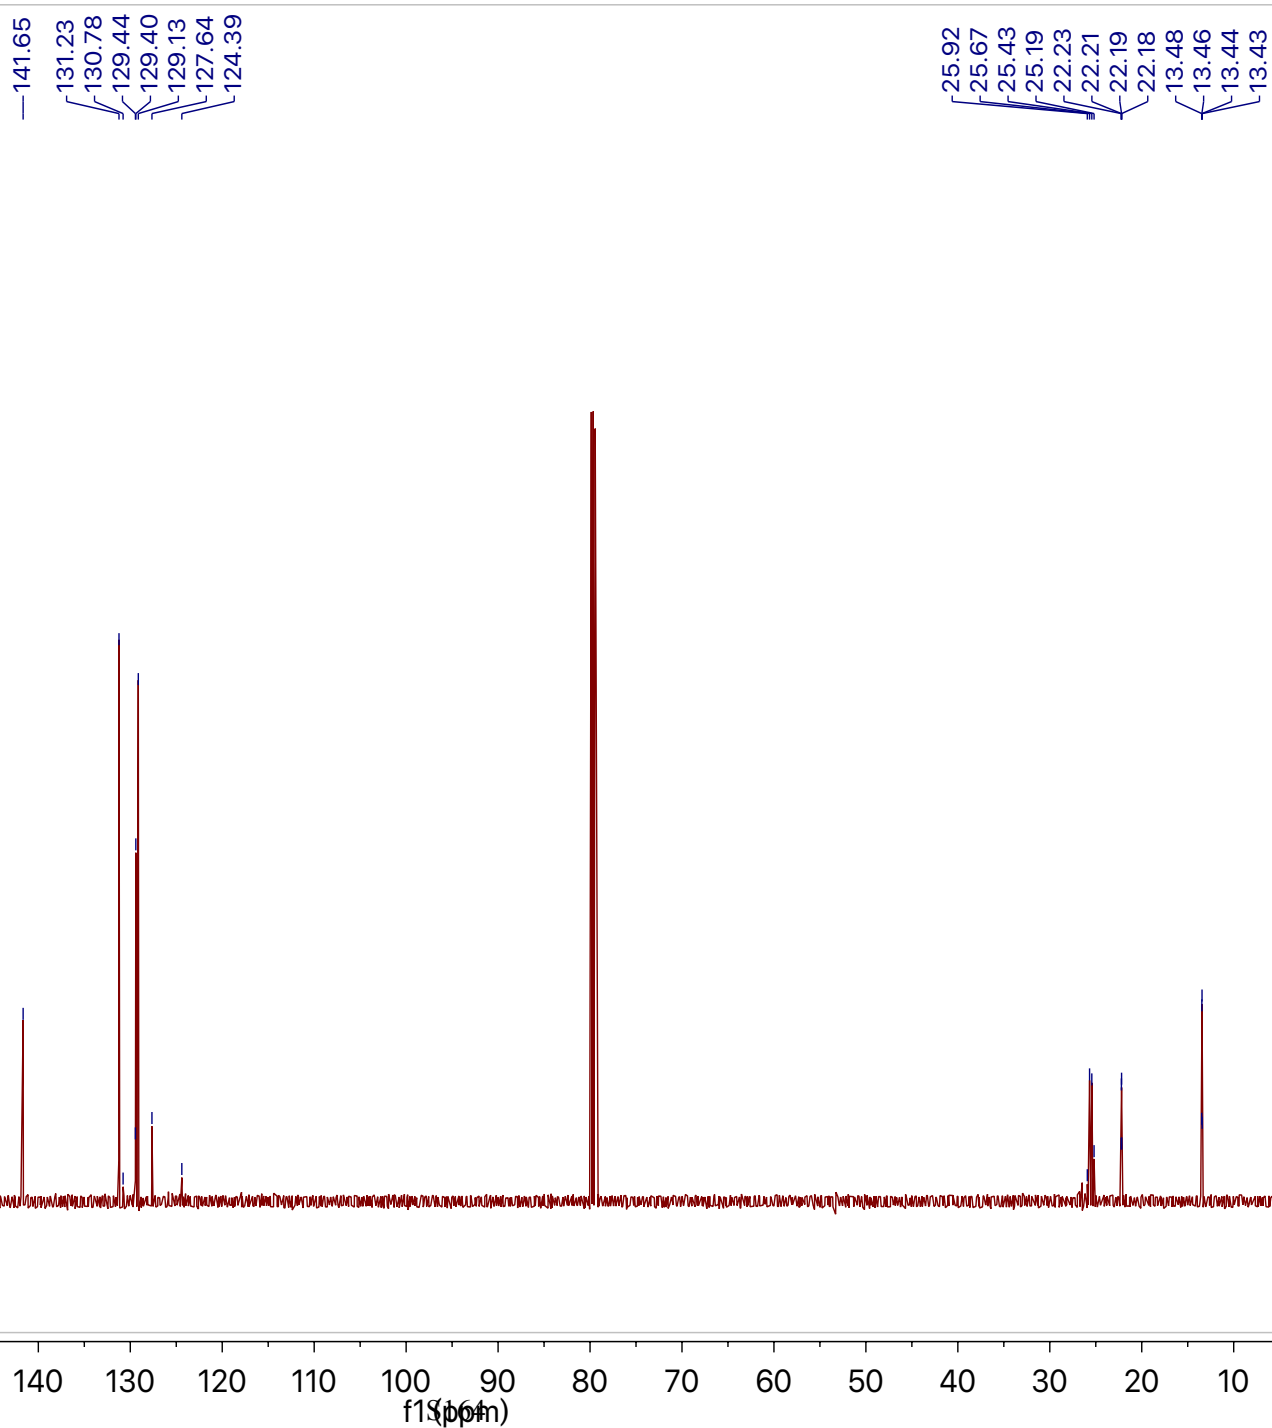

$^{19}\text{F}$  NMR of **3a**  
in Chloroform-*d*



-66.80  
-66.81

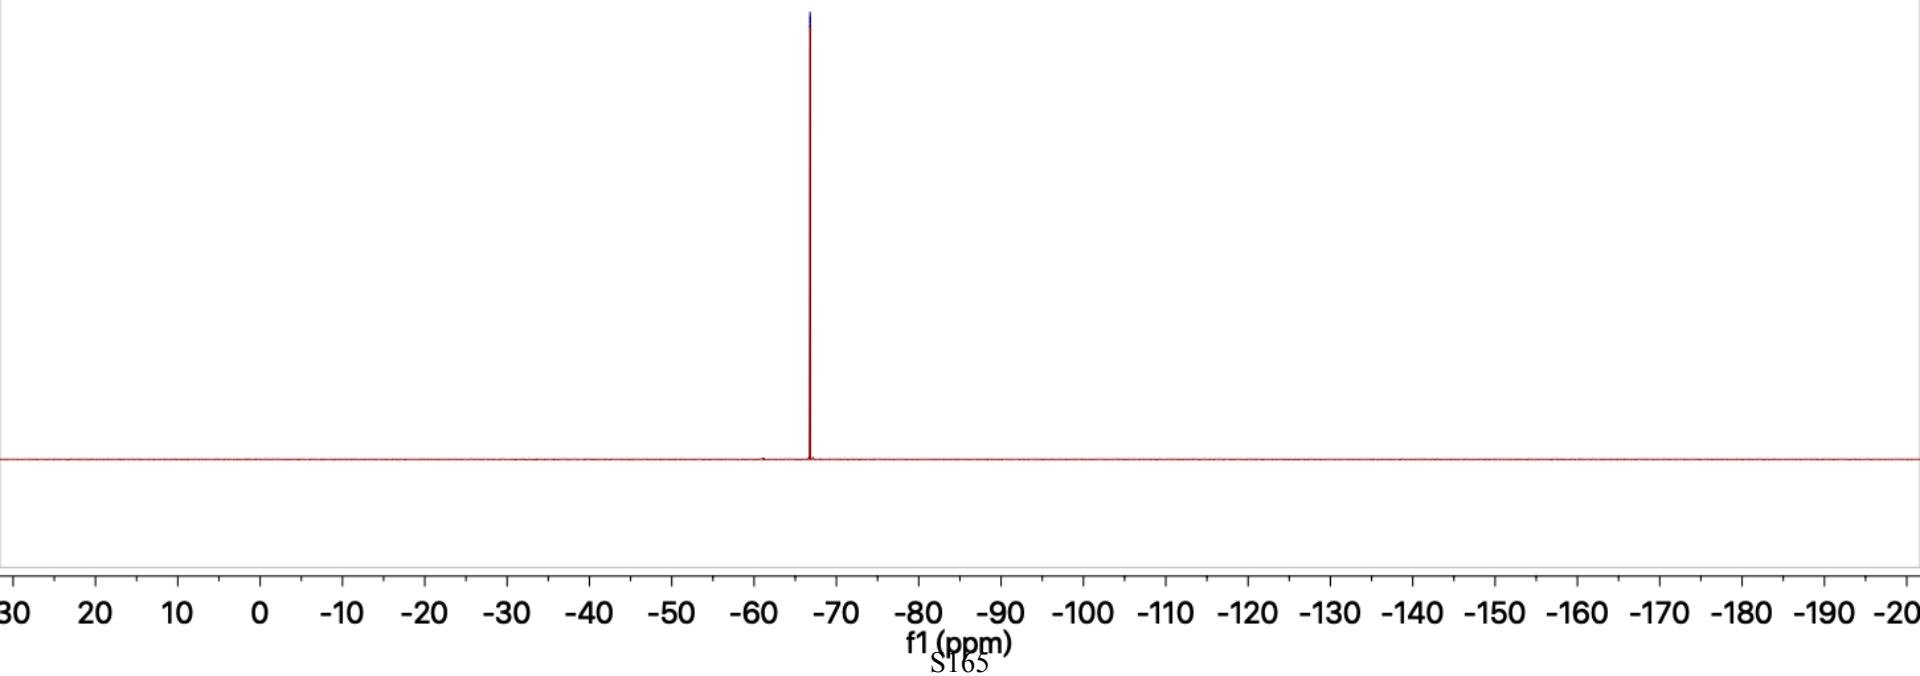

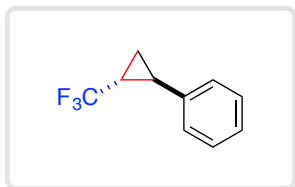

# HPLC of 3a

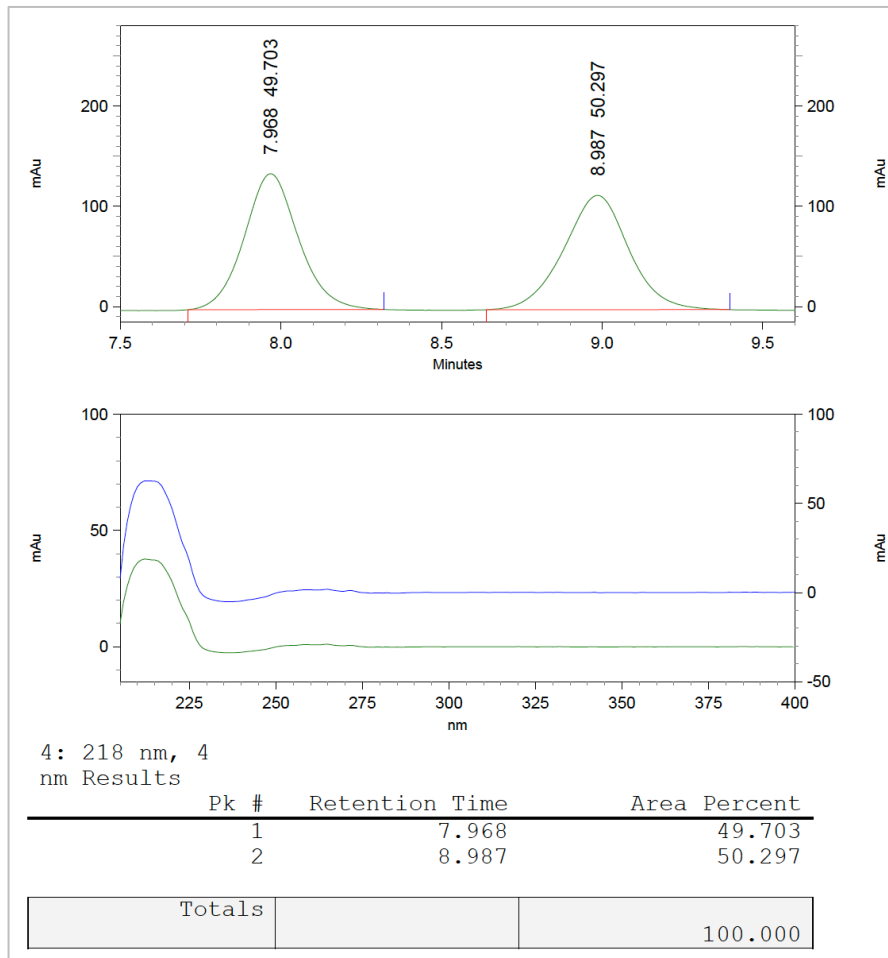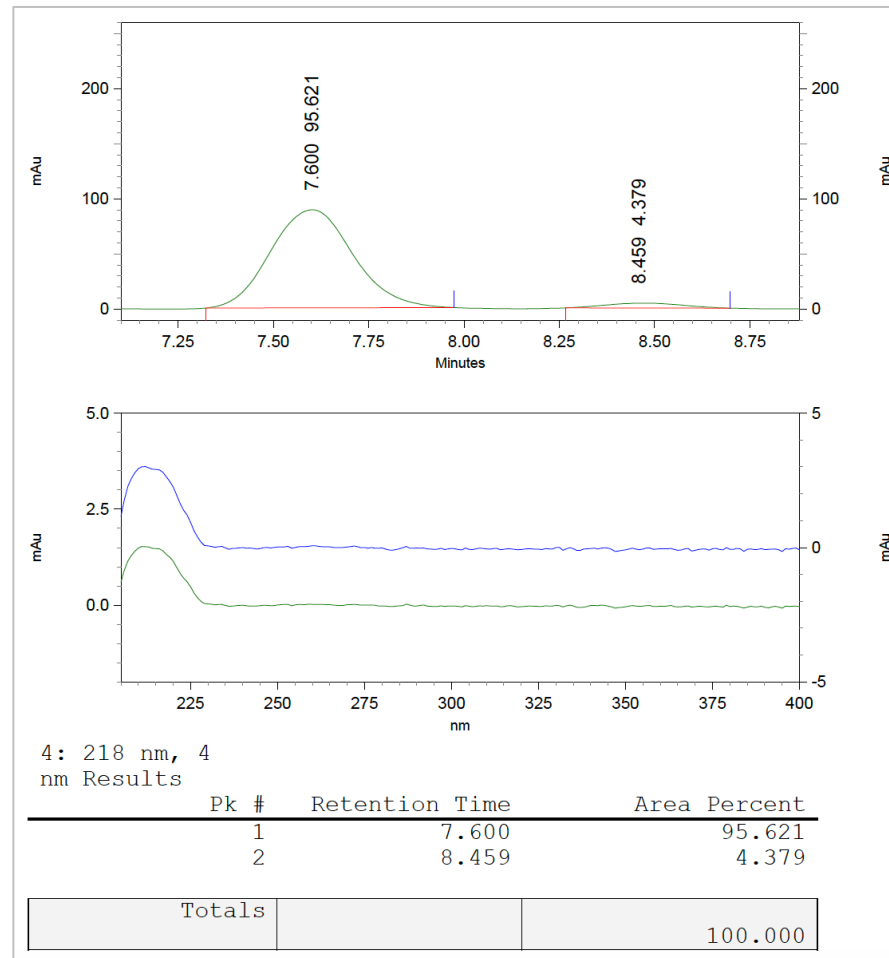

$^1\text{H}$  NMR of **3b**  
in Chloroform-*d*

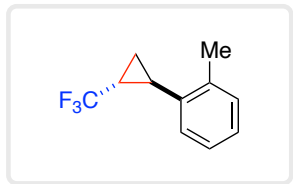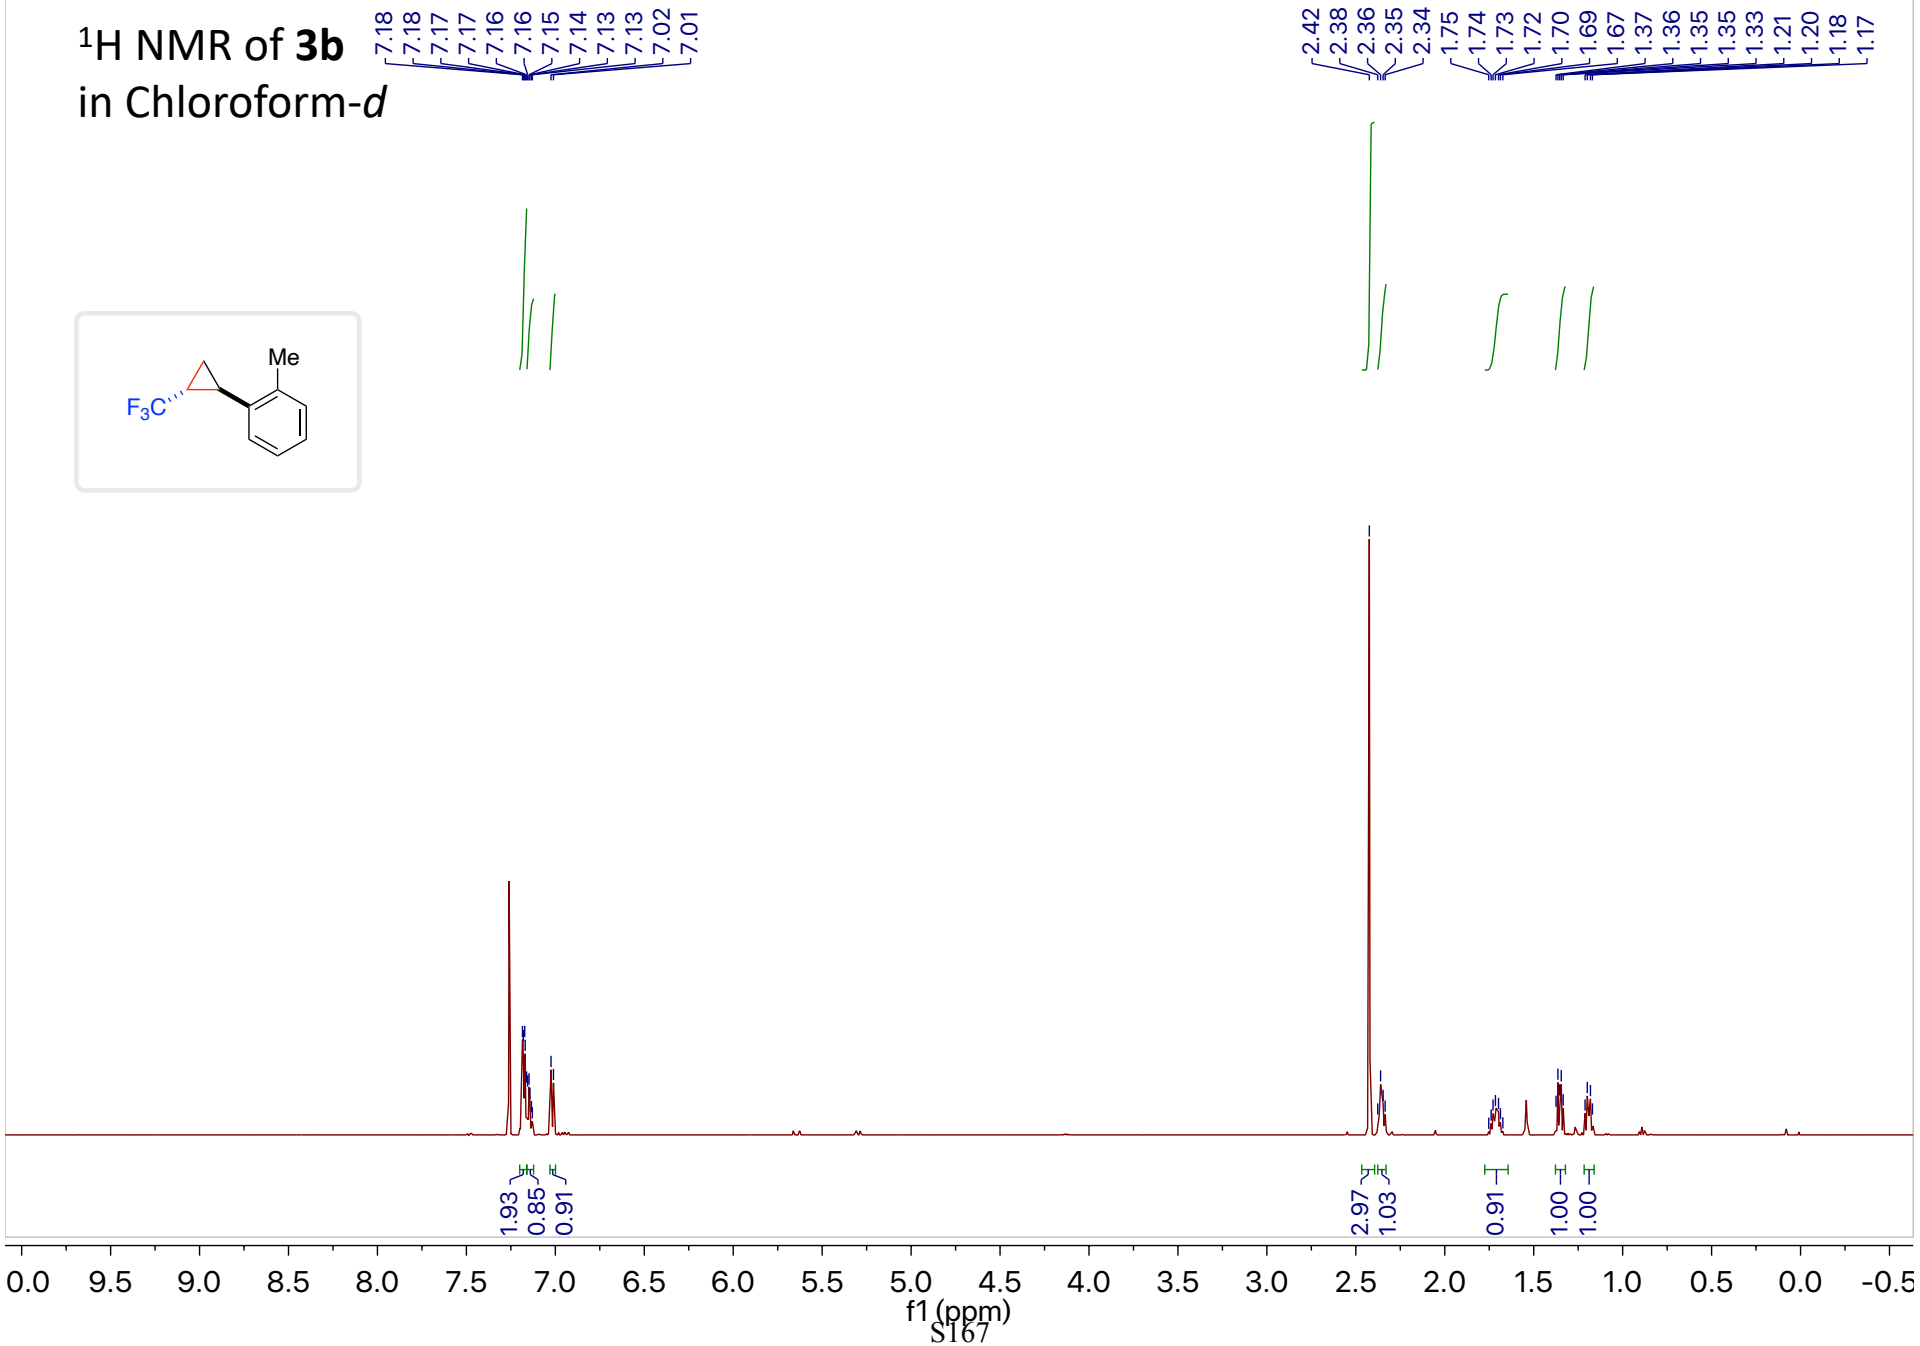



$^{13}\text{C}$  NMR of **3b**  
in Chloroform-*d*

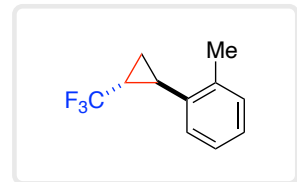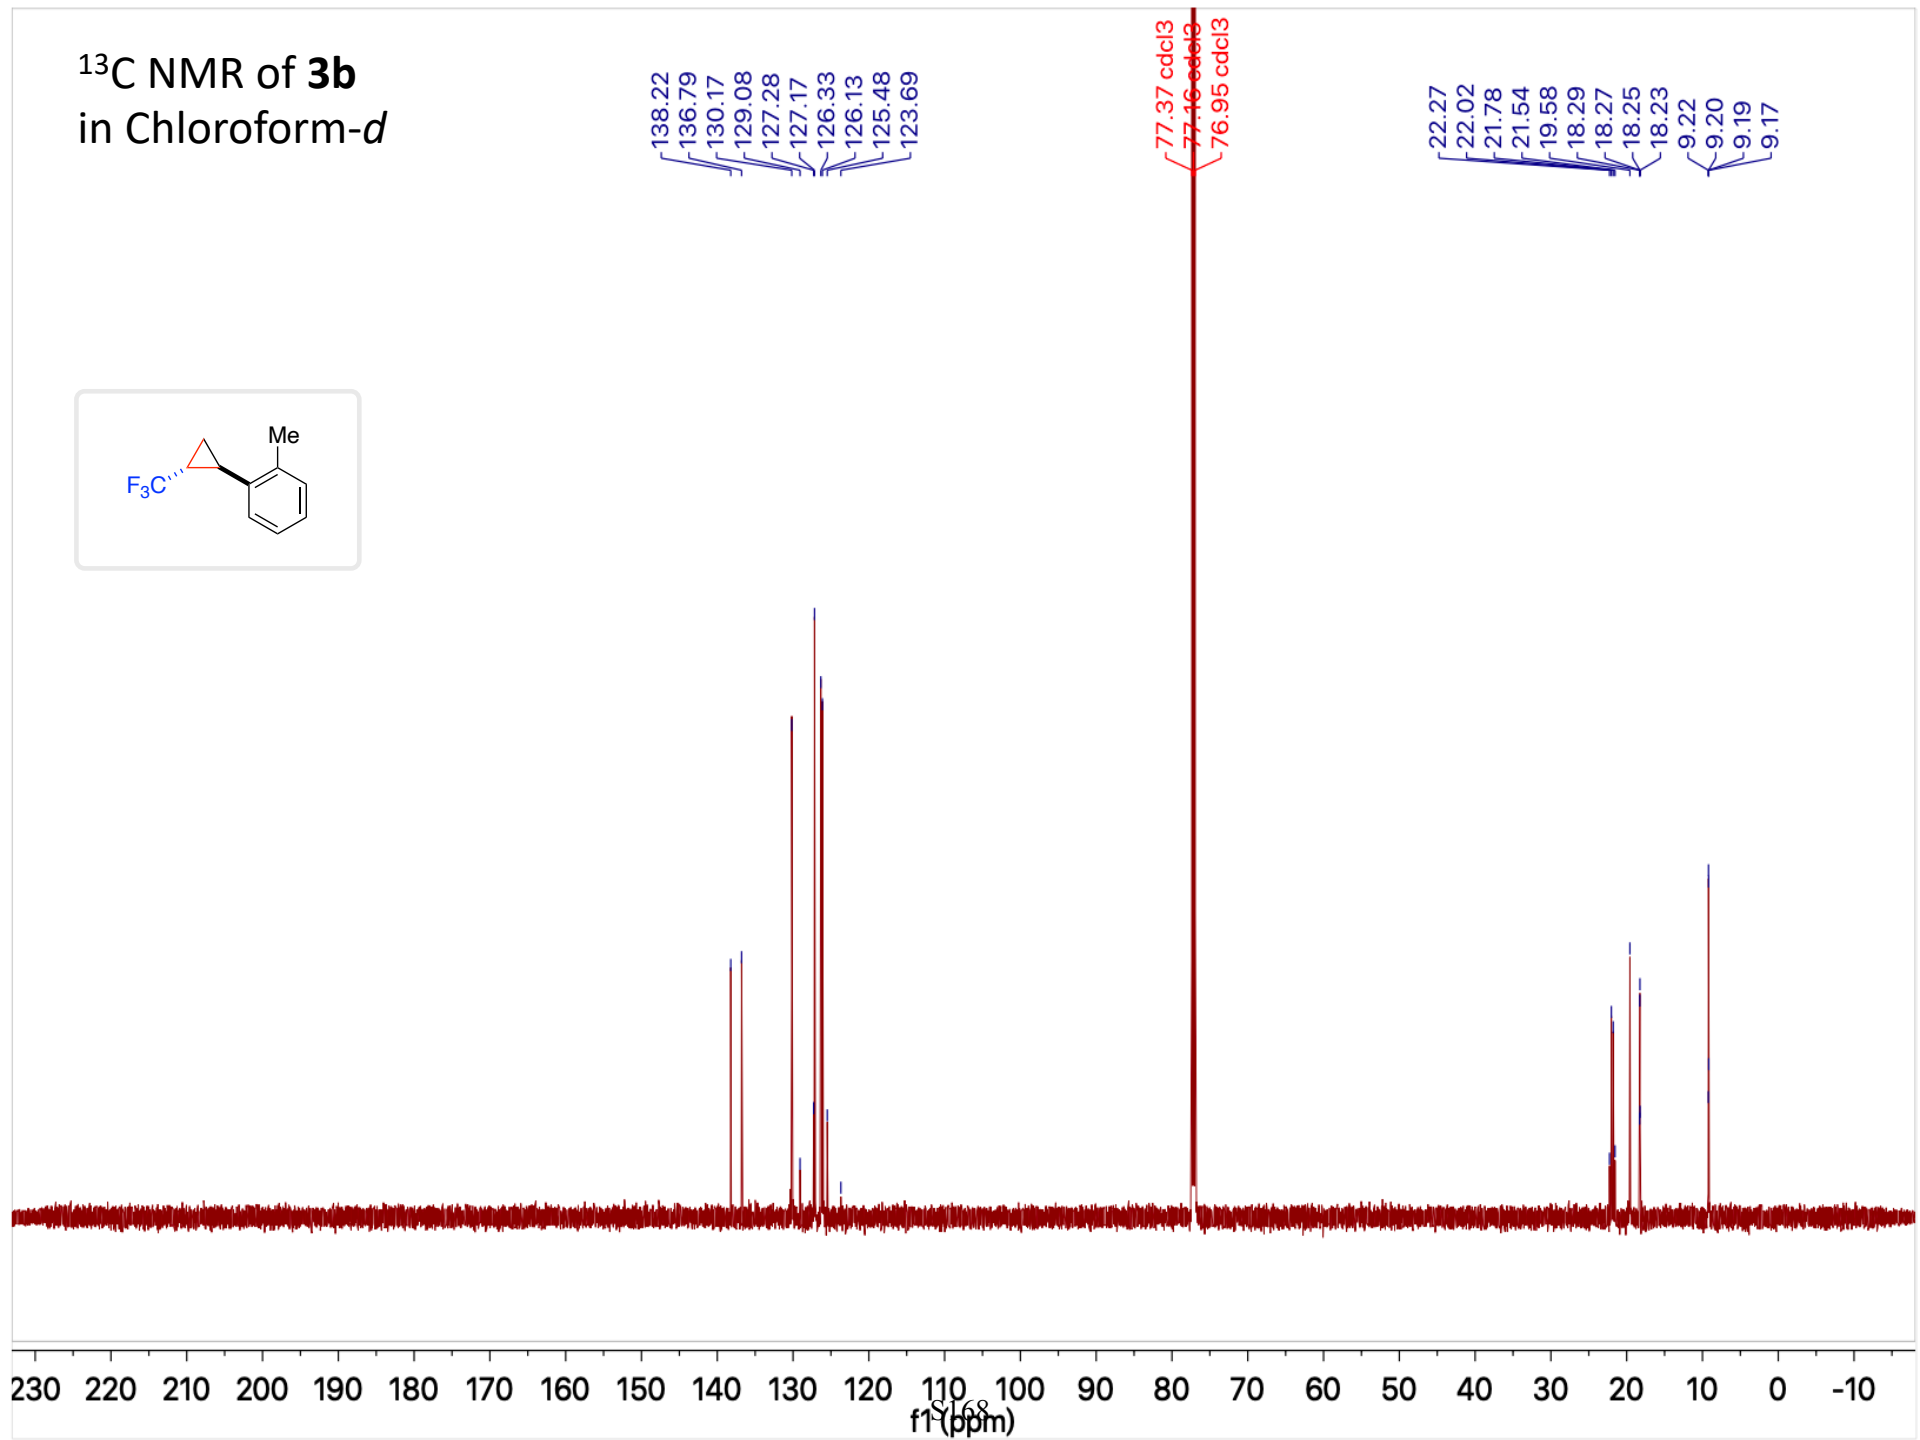

$^{19}\text{F}$  NMR of **3b**  
in Chloroform-*d*

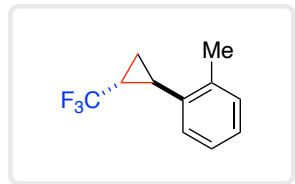

66.45  
66.46

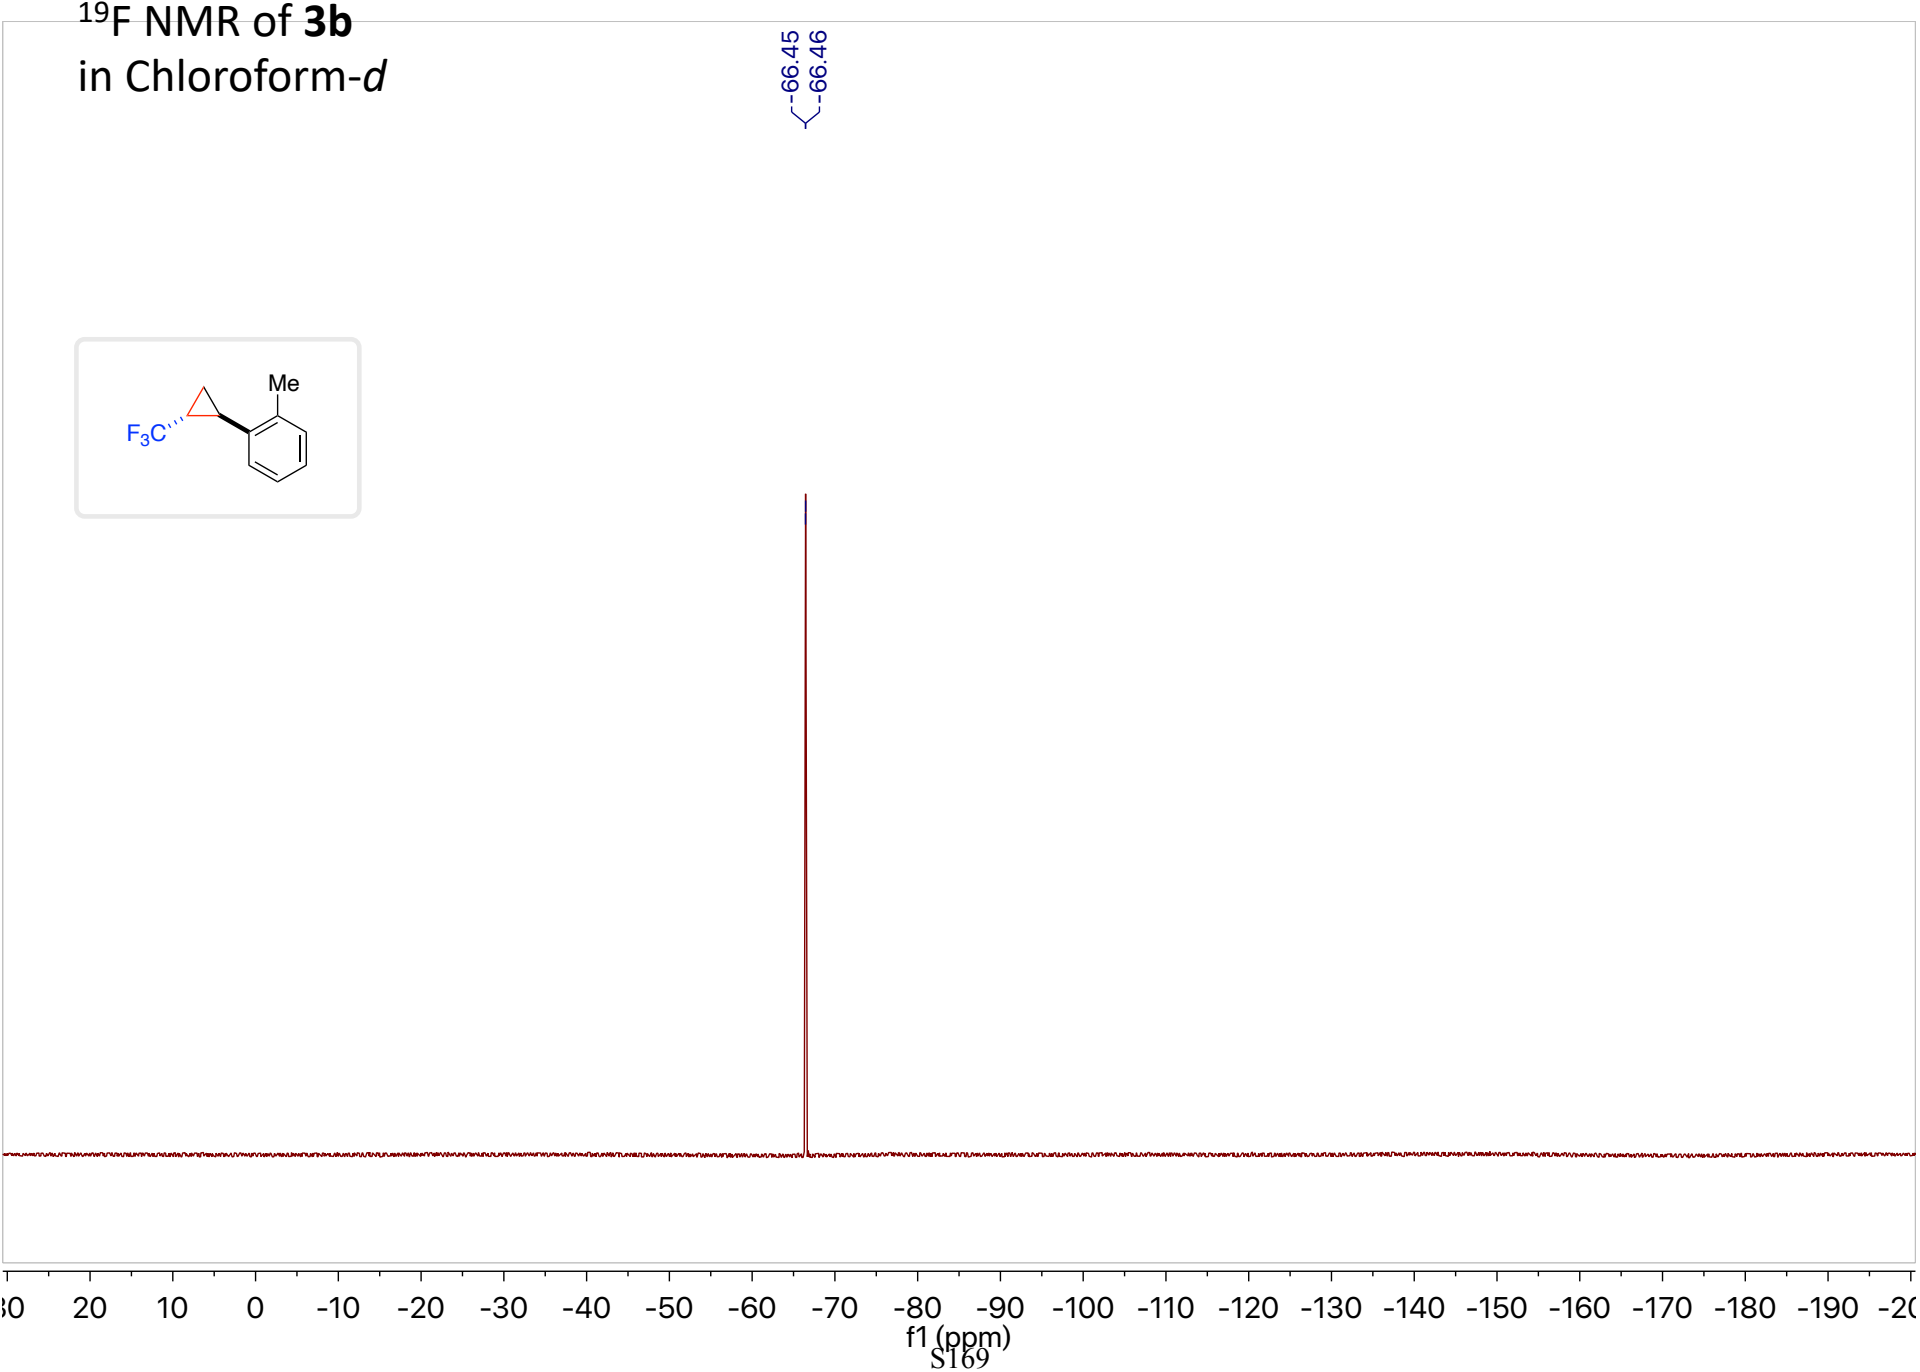

# HPLC of 3b

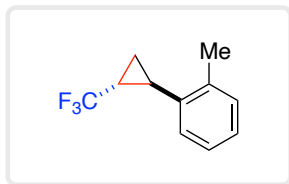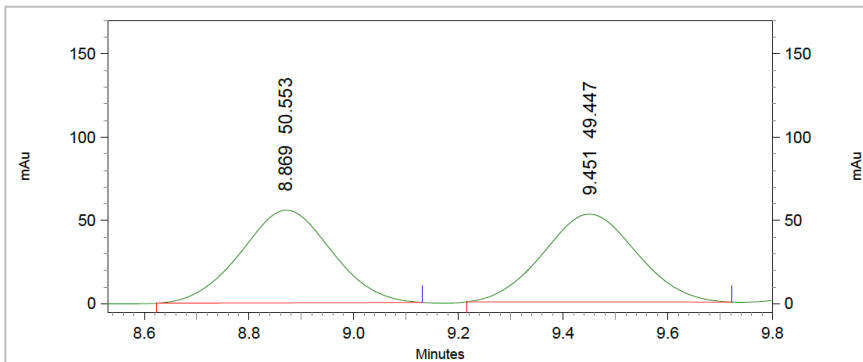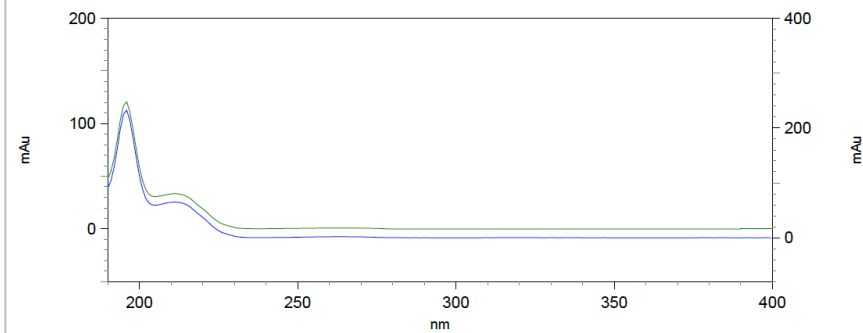

4: 222 nm, 4  
nm Results

| Pk # | Retention Time | Area Percent |
|------|----------------|--------------|
| 1    | 8.869          | 50.553       |
| 2    | 9.451          | 49.447       |

|        |  |         |
|--------|--|---------|
| Totals |  | 100.000 |
|--------|--|---------|

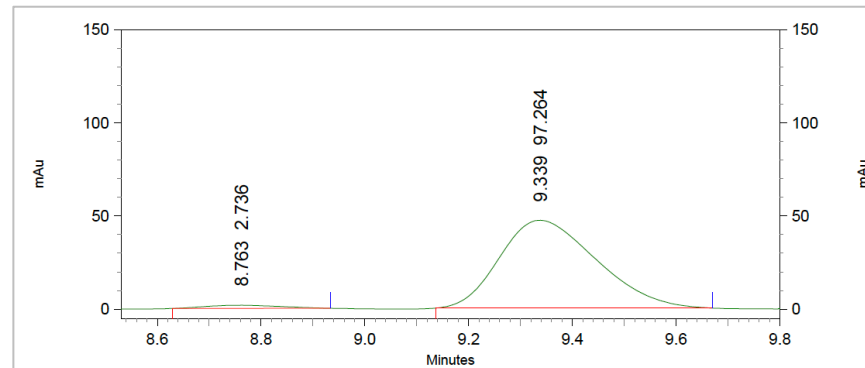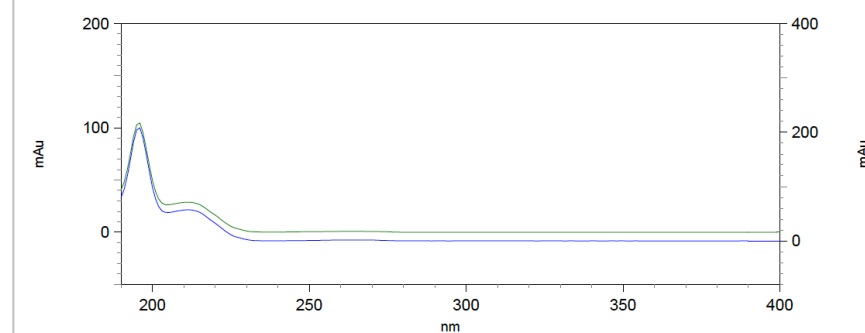

4: 222 nm, 4  
nm Results

| Pk # | Retention Time | Area Percent |
|------|----------------|--------------|
| 1    | 8.763          | 2.736        |
| 2    | 9.339          | 97.264       |

|        |  |         |
|--------|--|---------|
| Totals |  | 100.000 |
|--------|--|---------|

<sup>1</sup>H NMR of **3c**  
in Chloroform-*d*

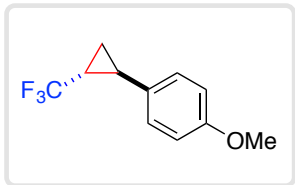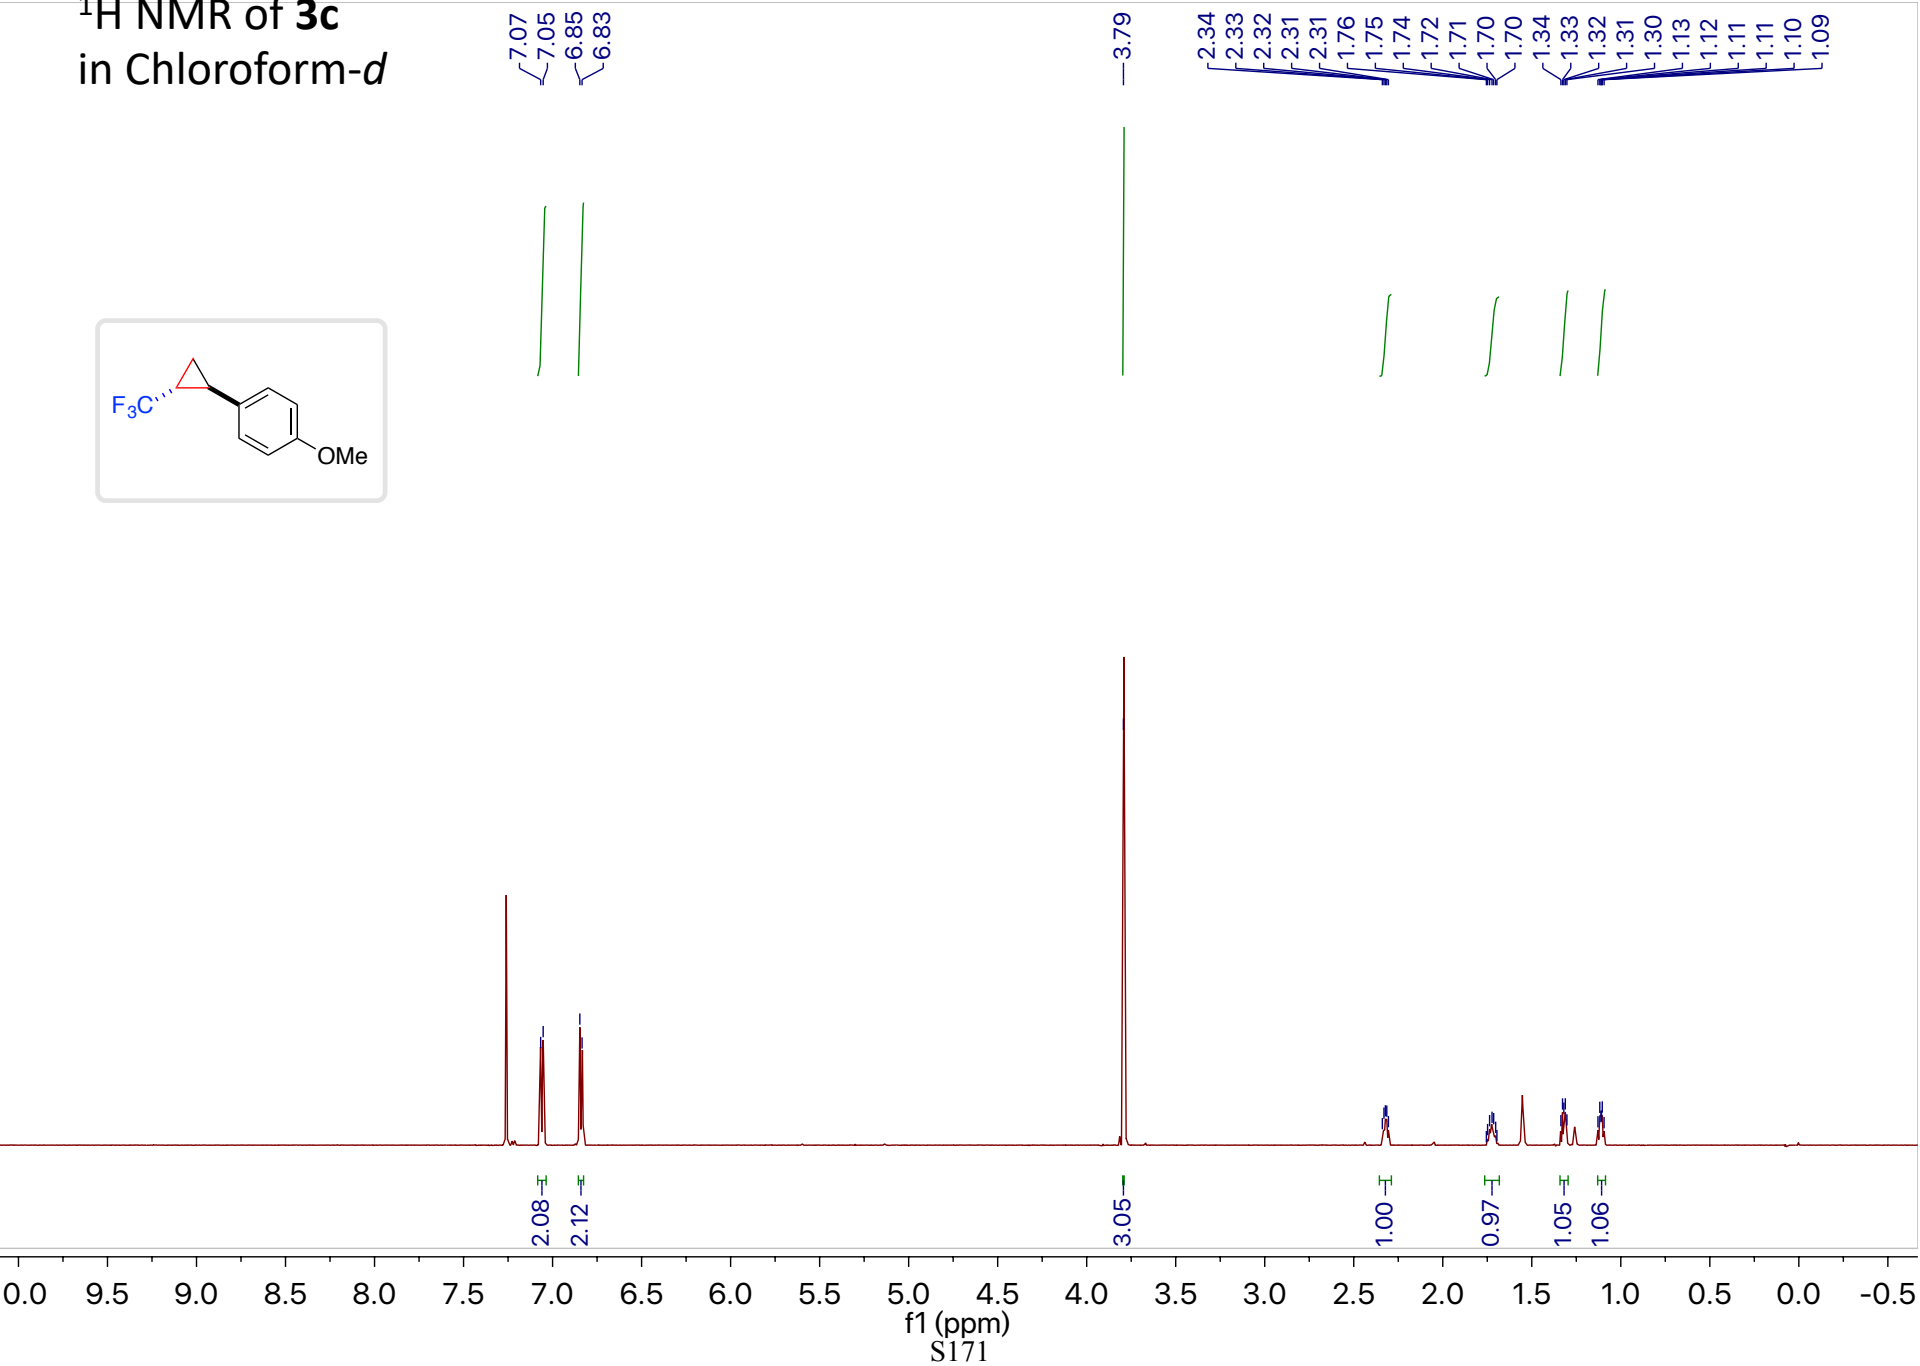

$^{13}\text{C}$  NMR of **3c**  
in Chloroform-*d*

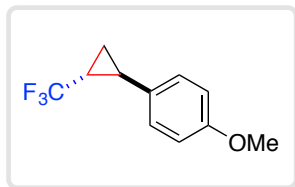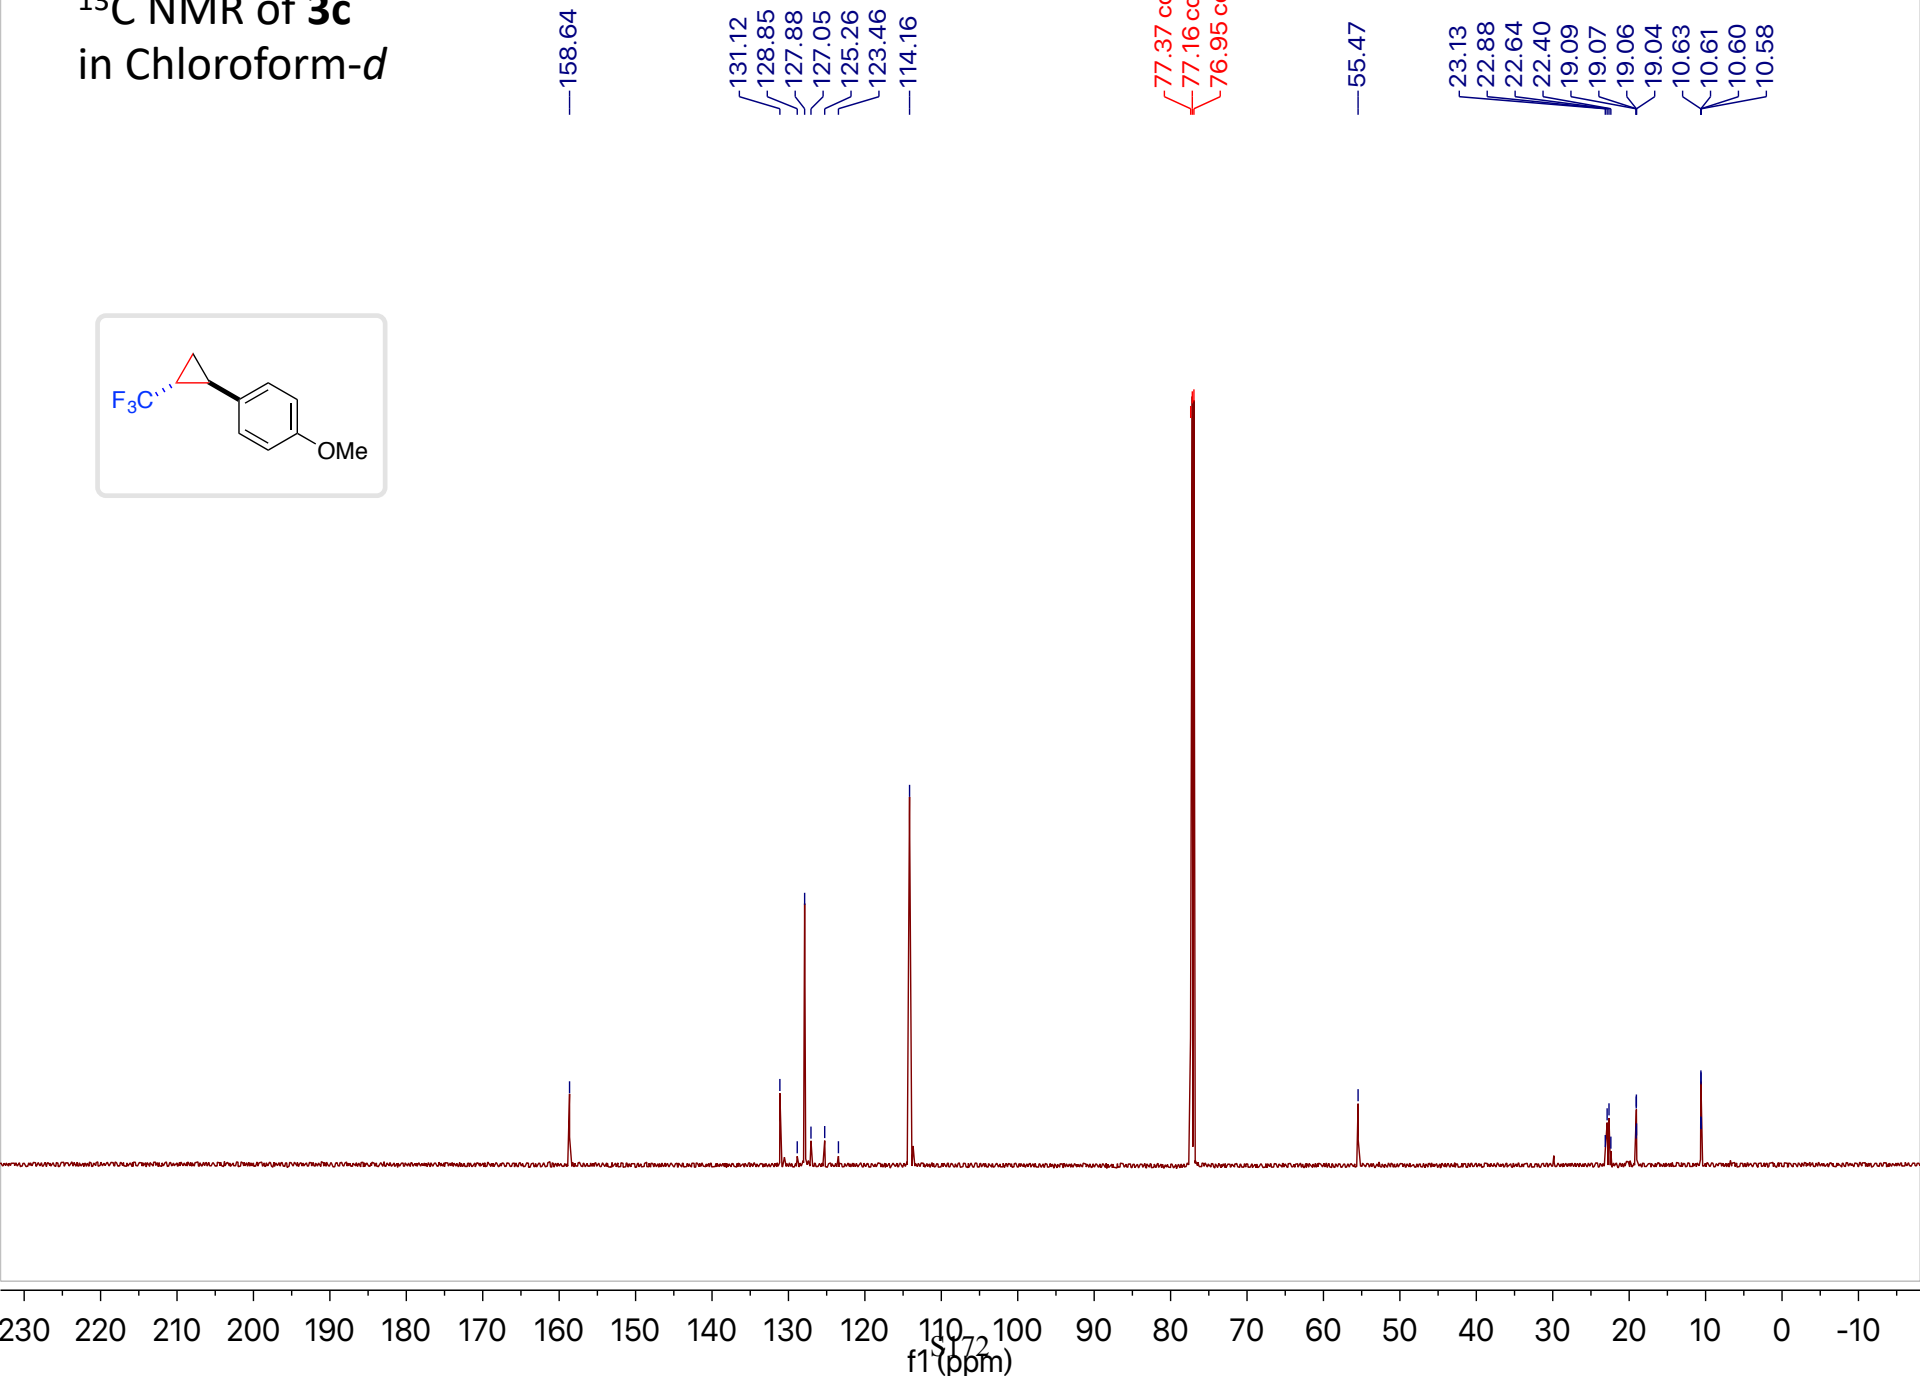

$^{19}\text{F}$  NMR of **3c**  
in Chloroform-*d*

-66.73  
-66.74

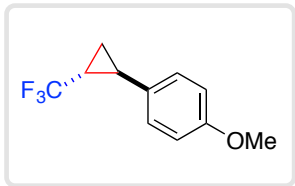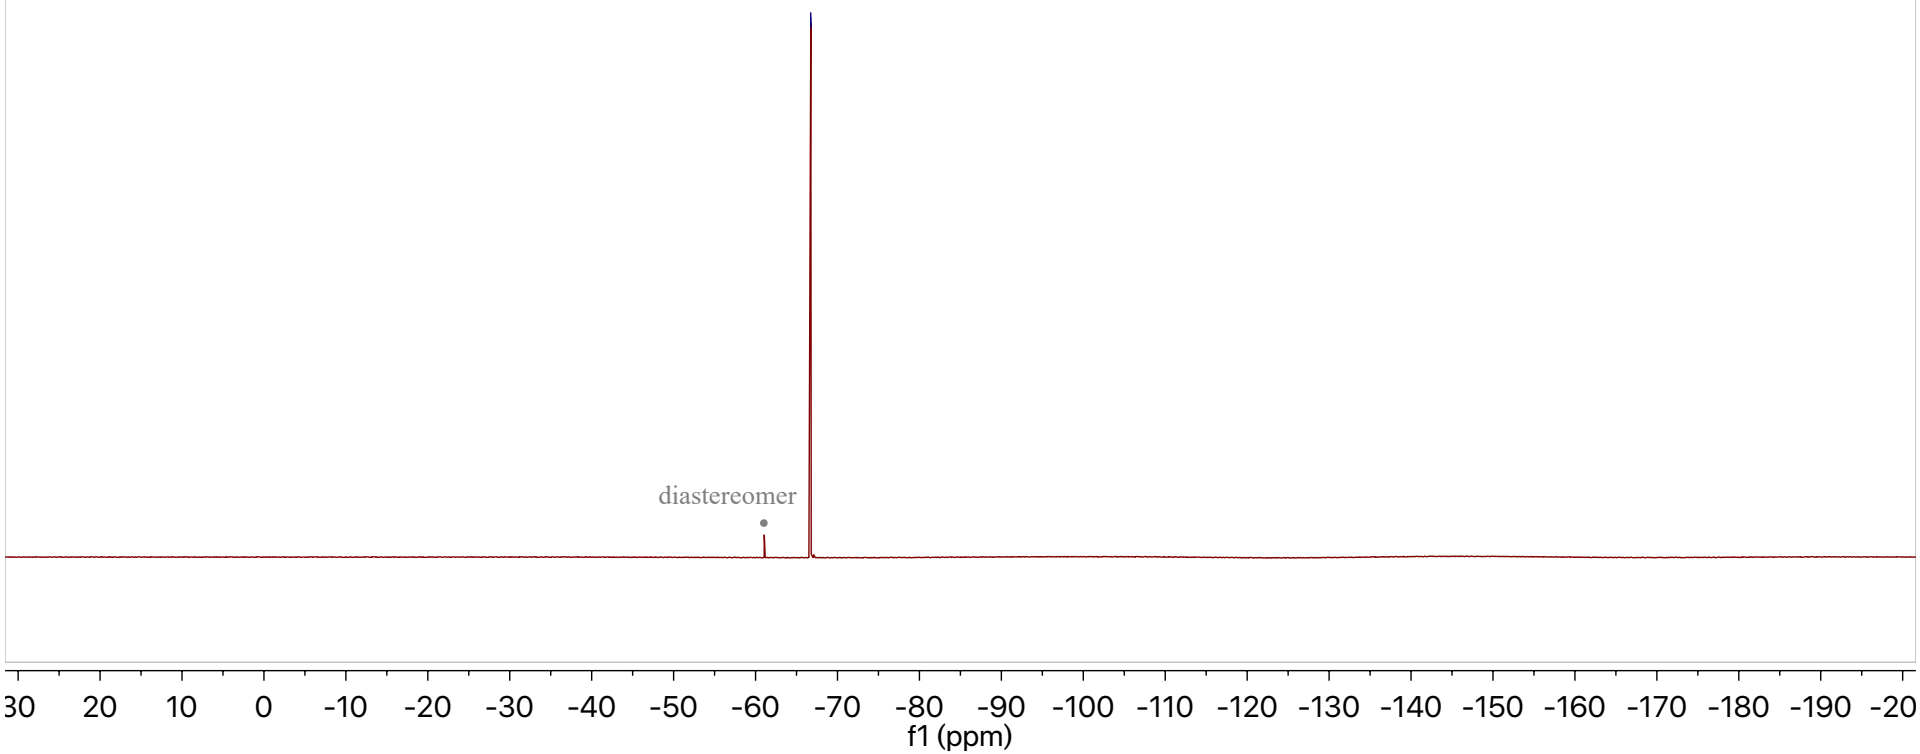

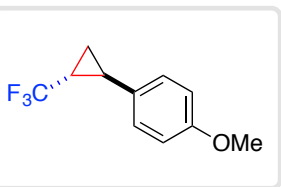

## HPLC of 3c

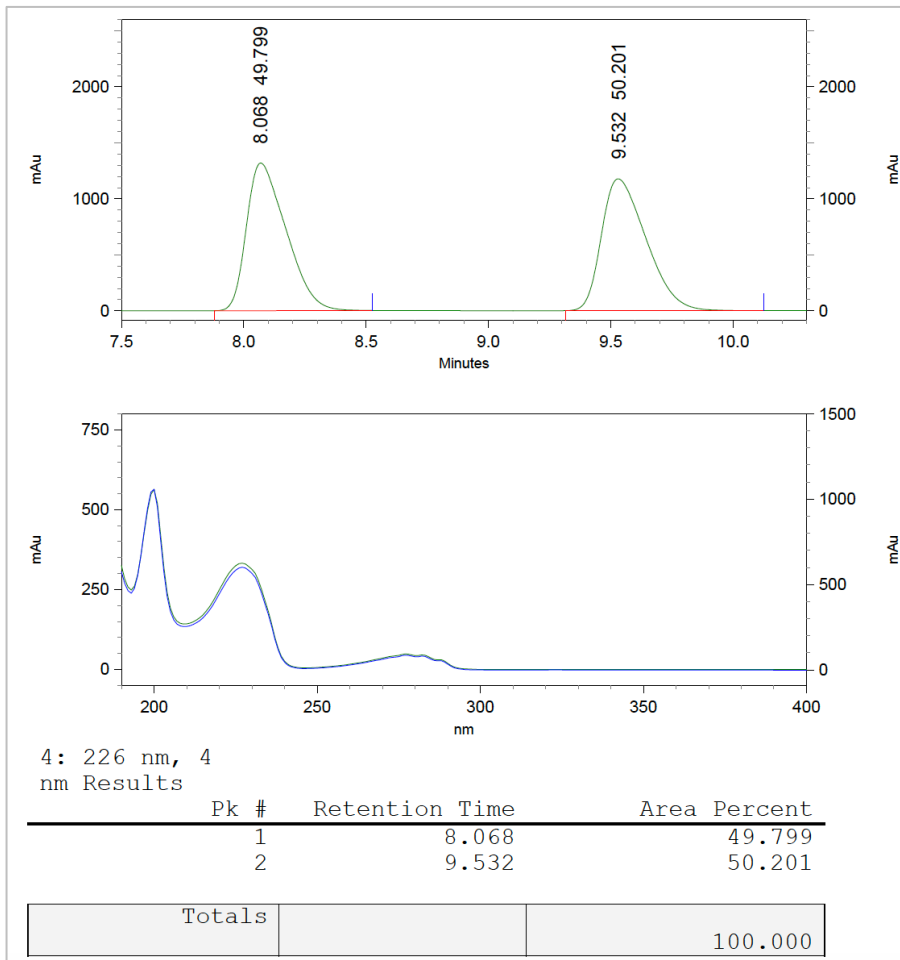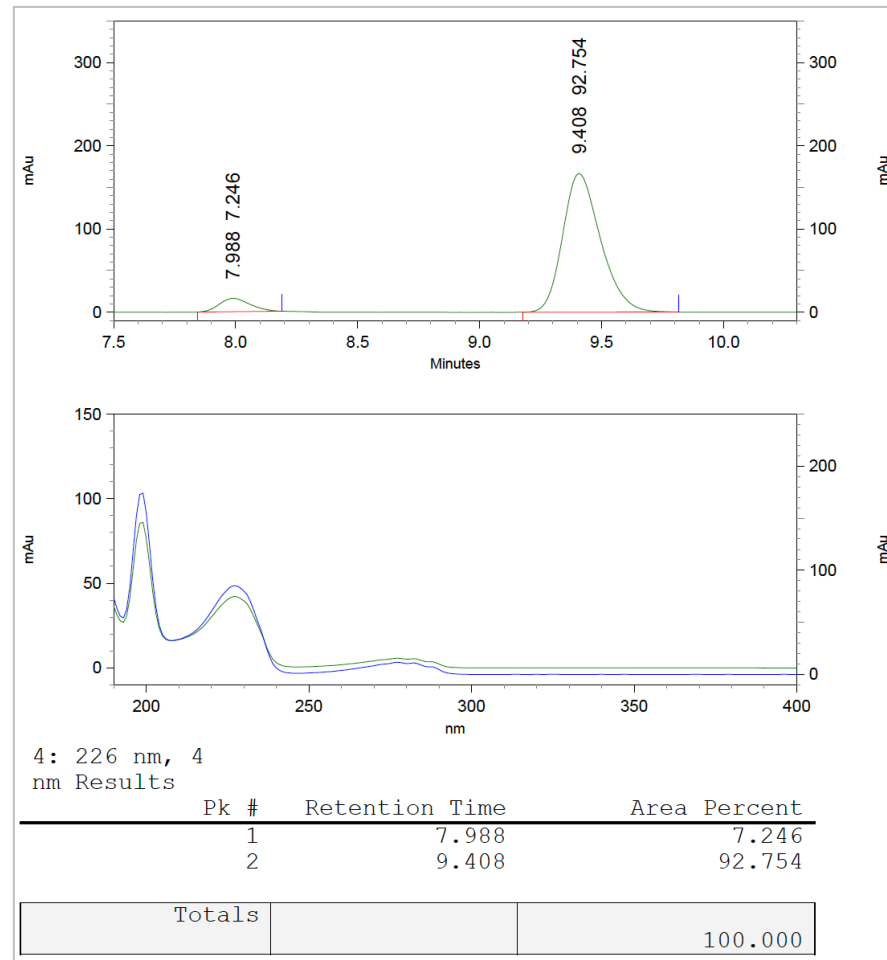

<sup>1</sup>H NMR of **3d**  
in Chloroform-*d*

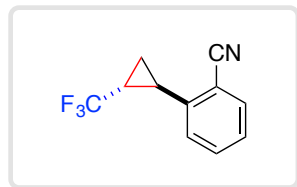

7.67  
7.65  
7.56  
7.54  
7.52  
7.36  
7.35  
7.33  
7.10  
7.09

2.71  
2.70  
2.69  
2.68  
2.67  
2.00  
1.99  
1.97  
1.96  
1.95  
1.93  
1.92  
1.59  
1.58  
1.57  
1.57  
1.28  
1.27  
1.25  
1.24

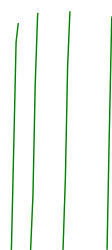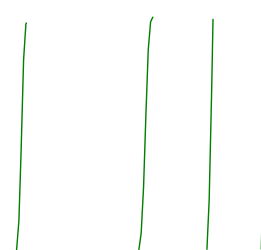

1.00  
1.04  
1.05  
1.03

1.00

1.03

1.02

1.09

10.5 10.0 9.5 9.0 8.5 8.0 7.5 7.0 6.5 6.0 5.5 5.0 4.5 4.0 3.5 3.0 2.5 2.0 1.5 1.0 0.5 0.0

f1 (ppm)

S175



$^{13}\text{C}$  NMR of **3d**  
in Chloroform-*d*

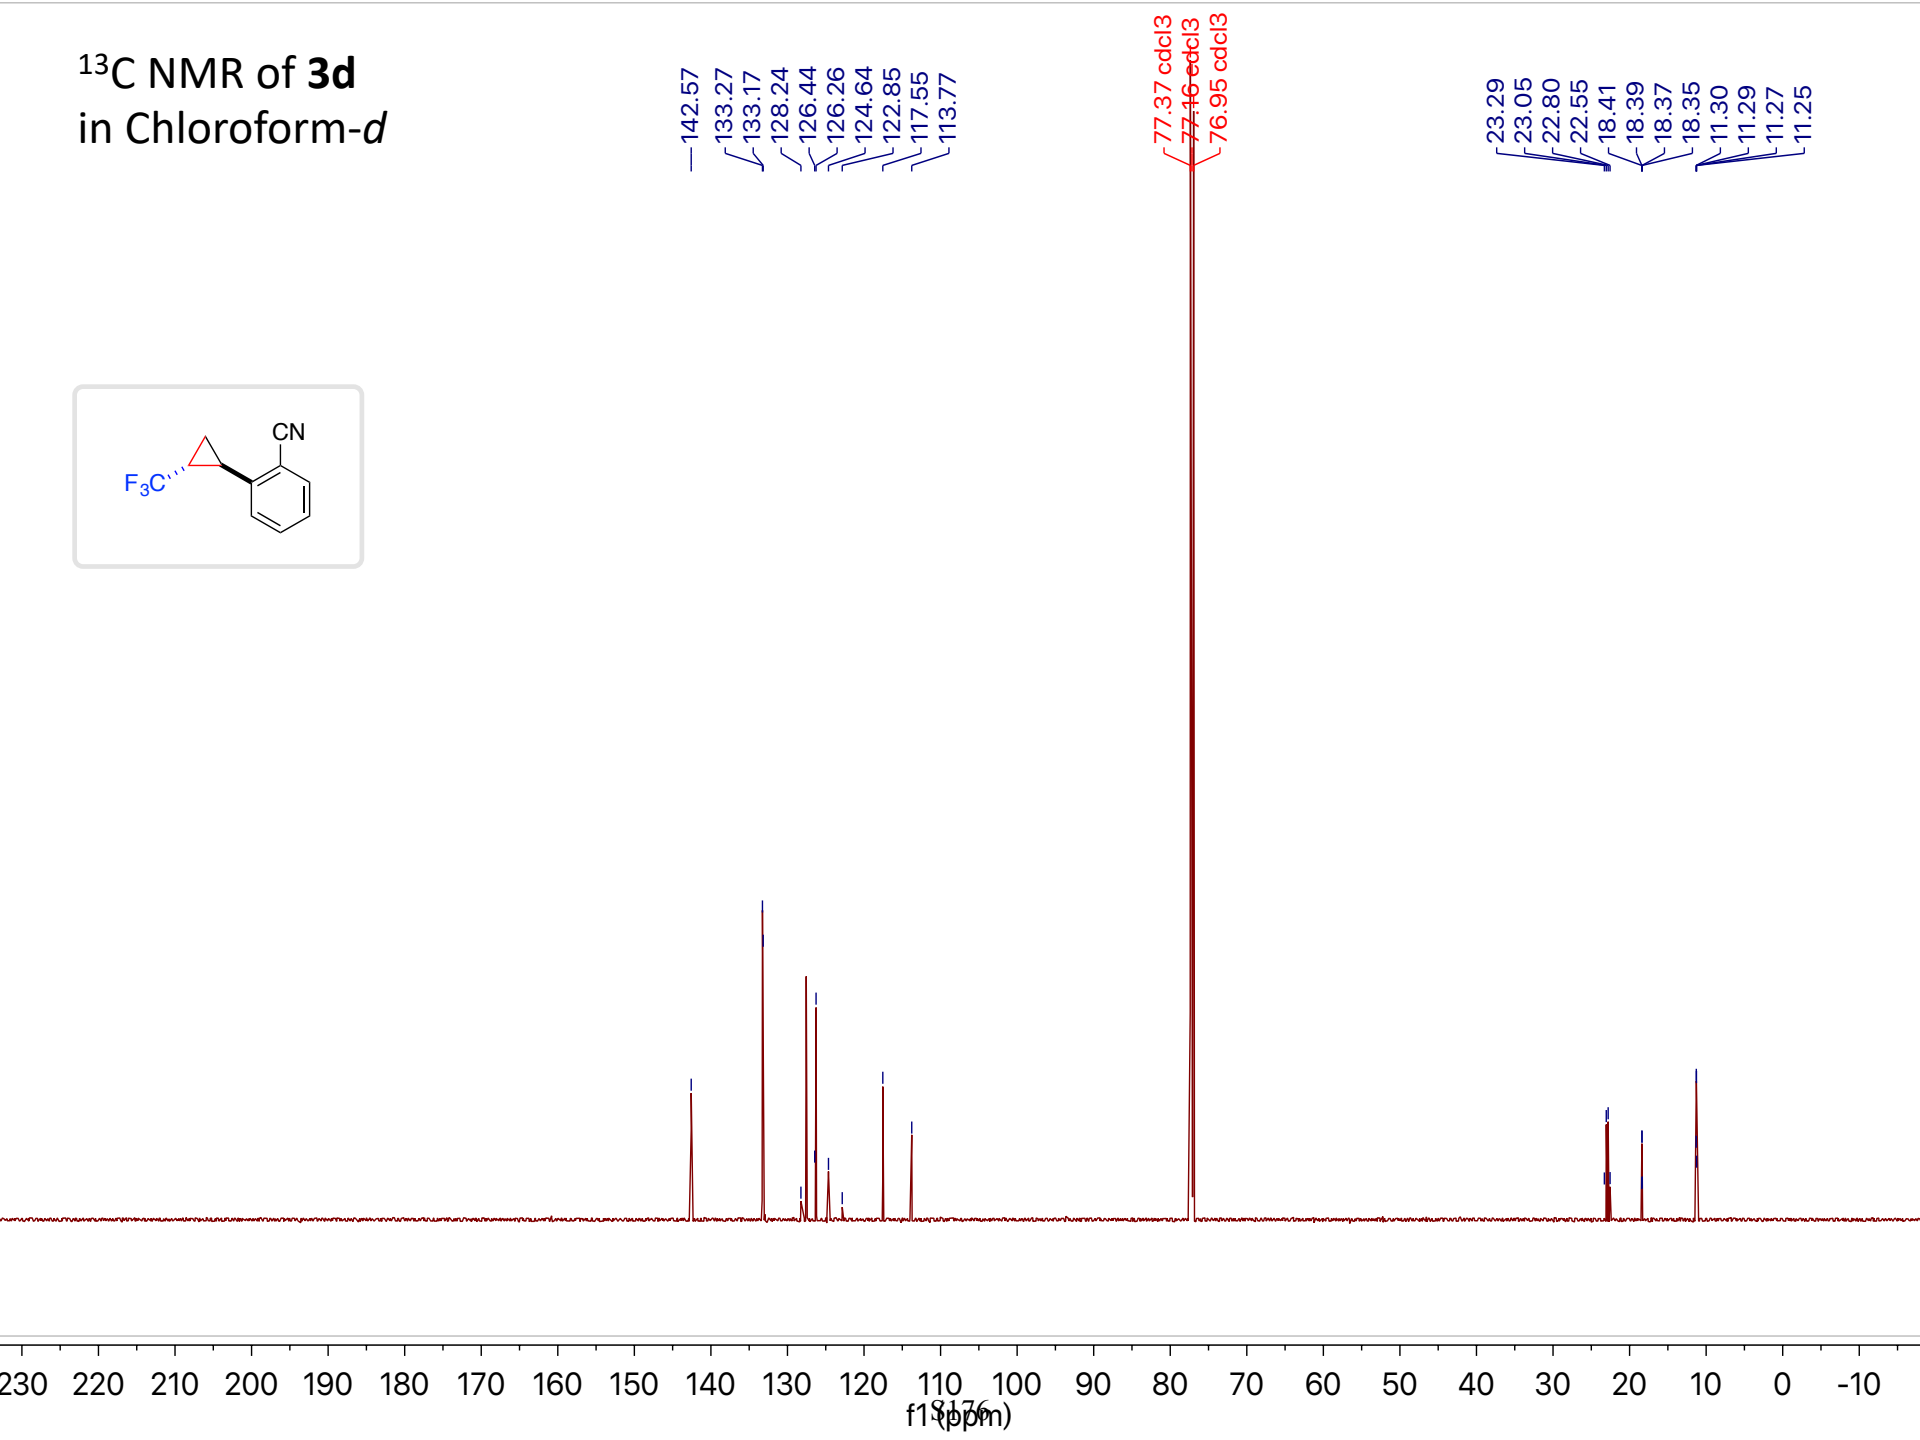

<sup>19</sup>F NMR of **3d**  
in Chloroform-*d*

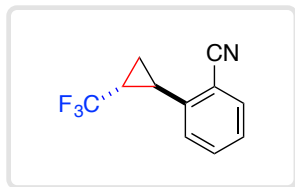

-66.90  
-66.91

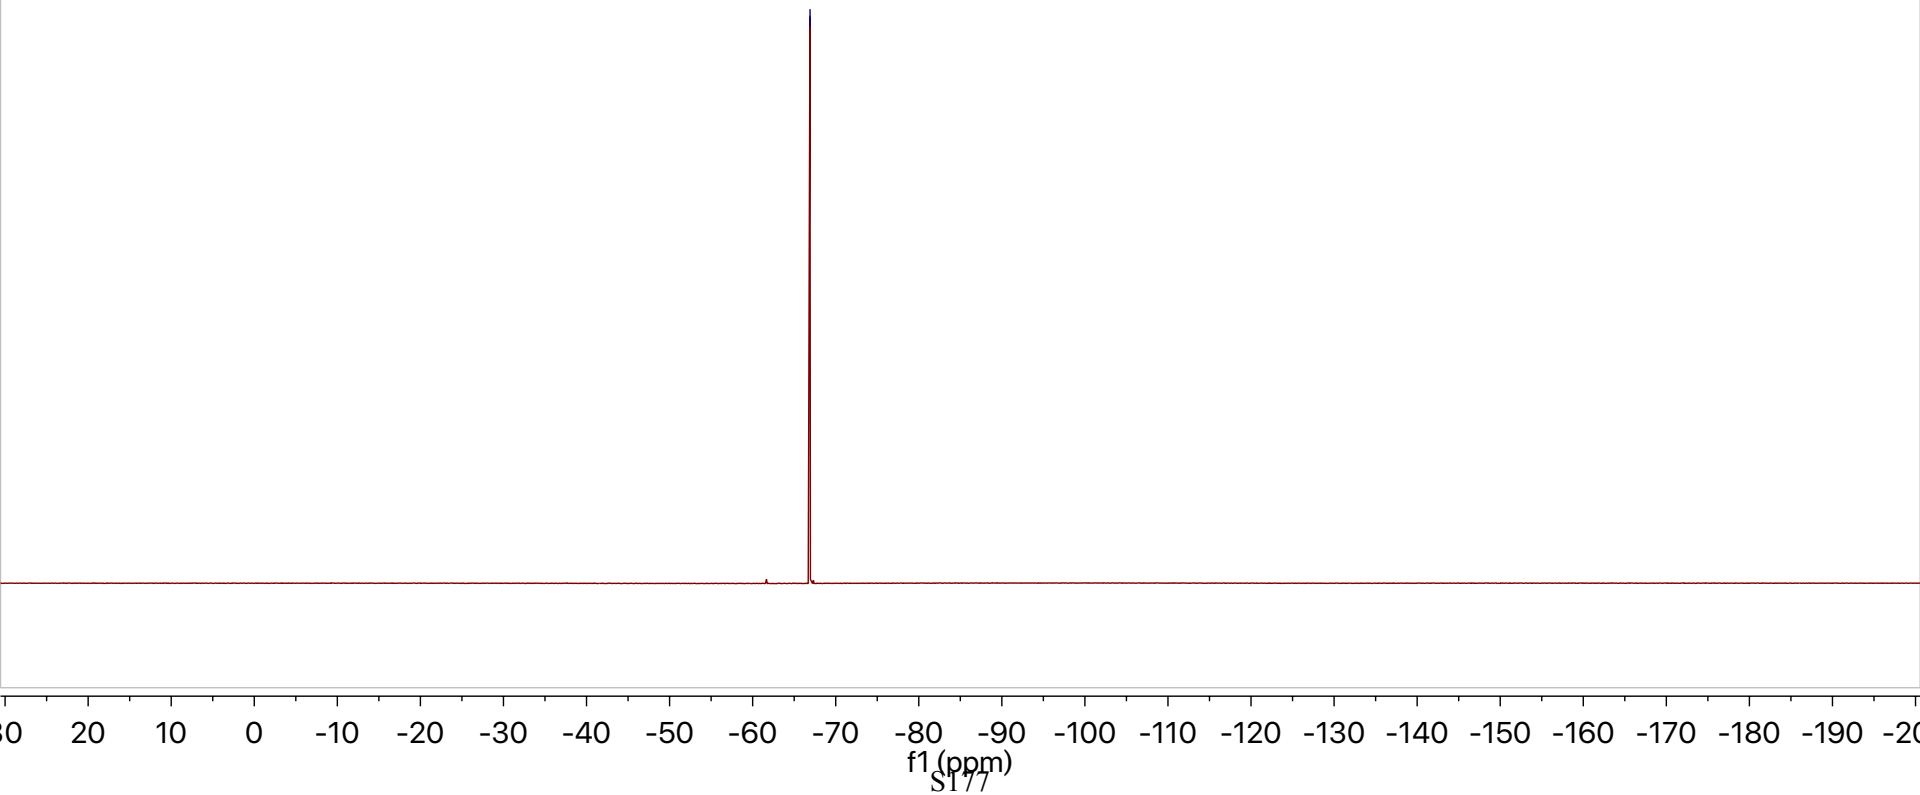

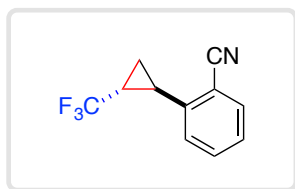

# HPLC of 3d

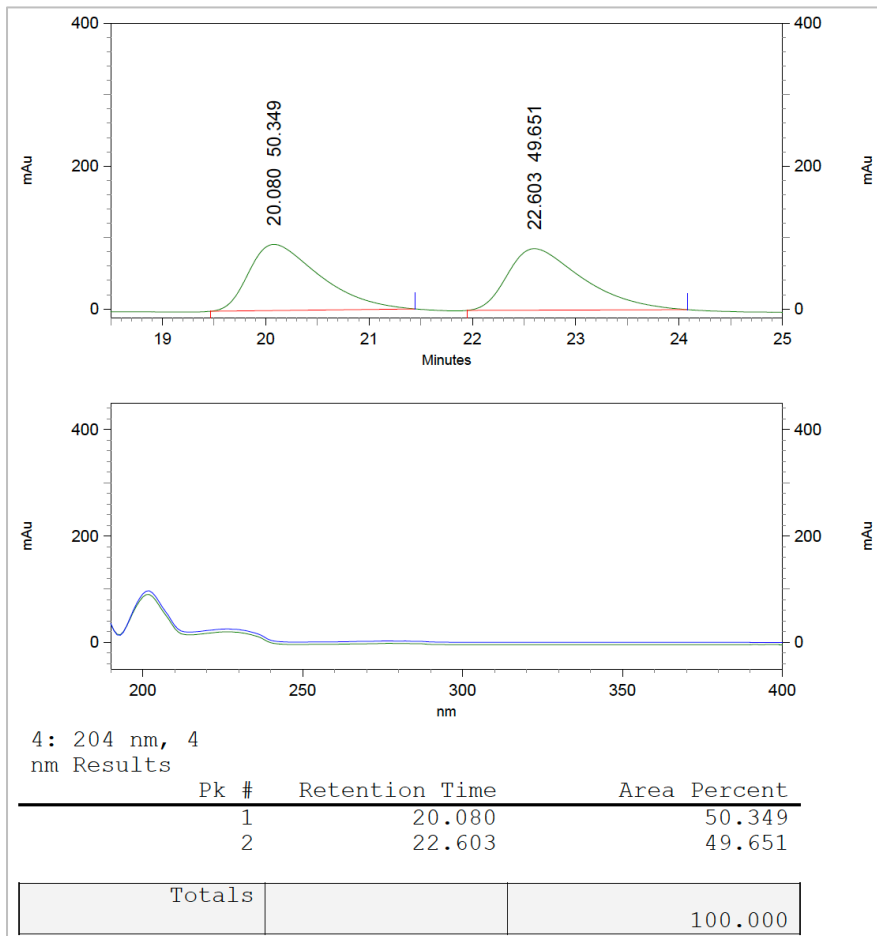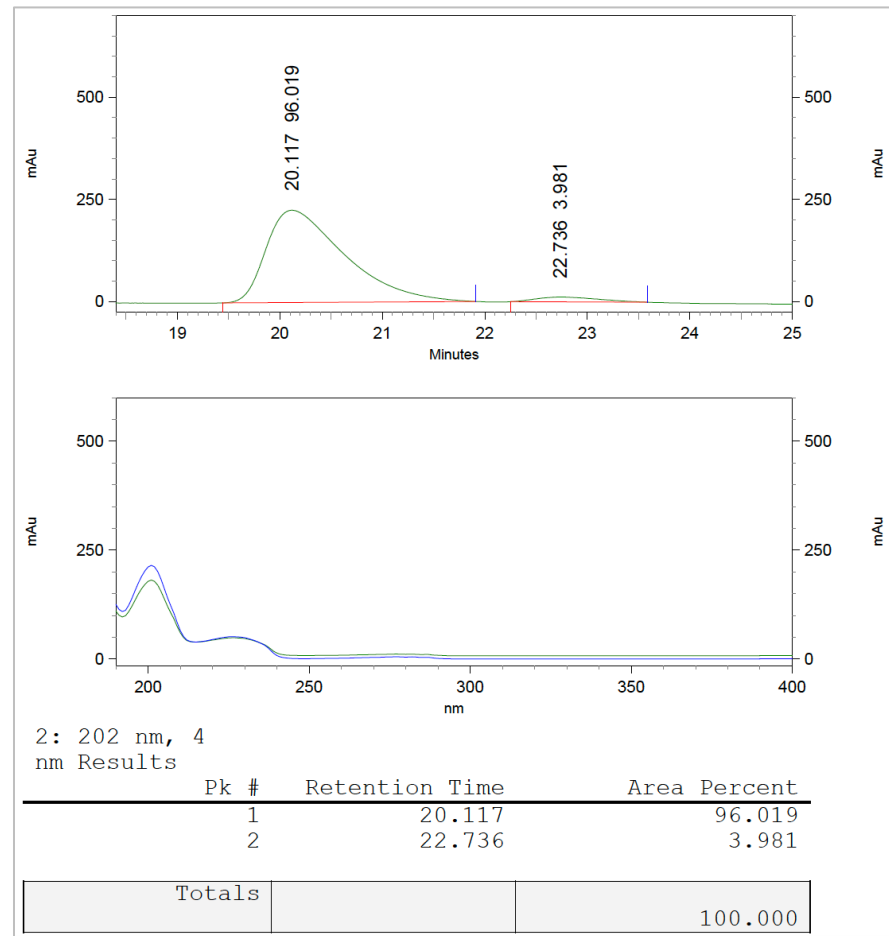

<sup>1</sup>H NMR of **3e**  
in Chloroform-*d*

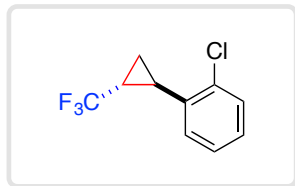

7.32  
7.31  
7.30  
7.13  
7.13  
7.12  
7.11  
6.97  
6.96  
6.95

2.53  
2.52  
2.51  
2.50  
2.49  
1.75  
1.74  
1.72  
1.71  
1.69  
1.68  
1.67  
1.37  
1.35  
1.35  
1.34  
1.32  
1.13  
1.11  
1.10  
1.08

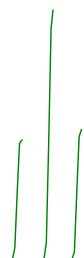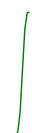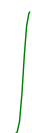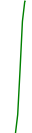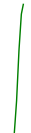

0.97  
2.04  
1.06

0.99

1.00

1.09

1.06

10.0 9.5 9.0 8.5 8.0 7.5 7.0 6.5 6.0 5.5 5.0 4.5 4.0 3.5 3.0 2.5 2.0 1.5 1.0 0.5 0.0 -0.5

f1 (ppm)

S179

<sup>13</sup>C NMR of **3e**  
in Chloroform-*d*

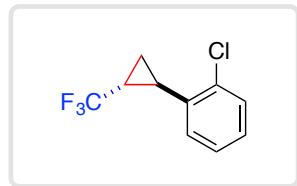

136.48  
135.73  
129.69  
128.73  
128.33  
127.55  
126.99  
126.93  
125.14  
123.34

77.37 cdcl3  
77.16 cdcl3  
76.95 cdcl3

22.67  
22.42  
22.17  
21.93  
18.24  
18.22  
18.20  
18.18  
9.94  
9.92  
9.90  
9.89

180 170 160 150 140 130 120 110 100 90 80 70 60 50 40 30 20 10 0 -10  
f1 (ppm)

$^{19}\text{F}$  NMR of **3e**  
in Chloroform-*d*

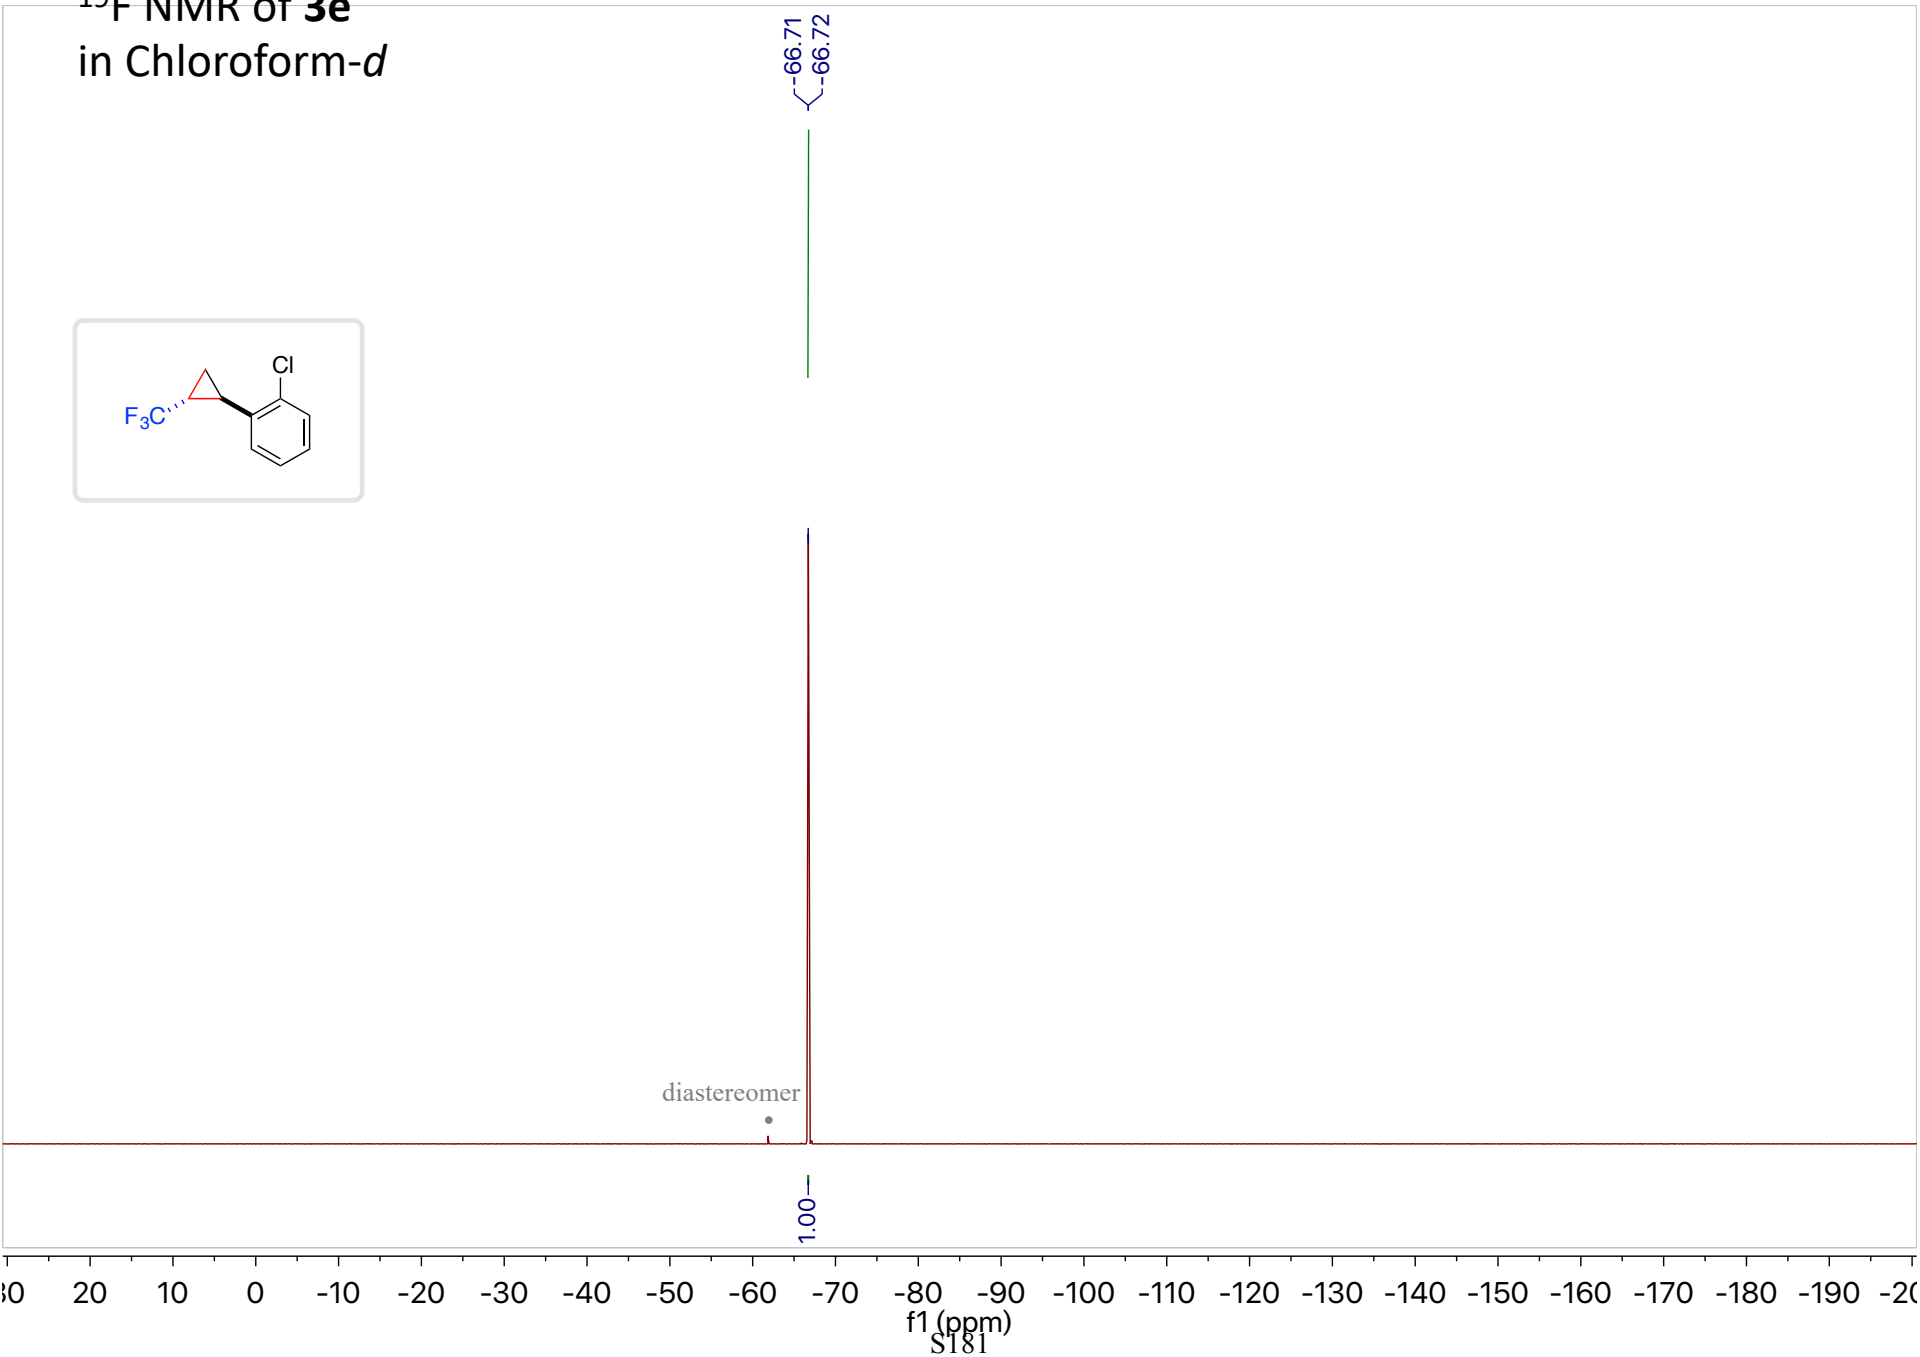

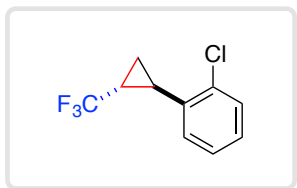

# HPLC of 3e

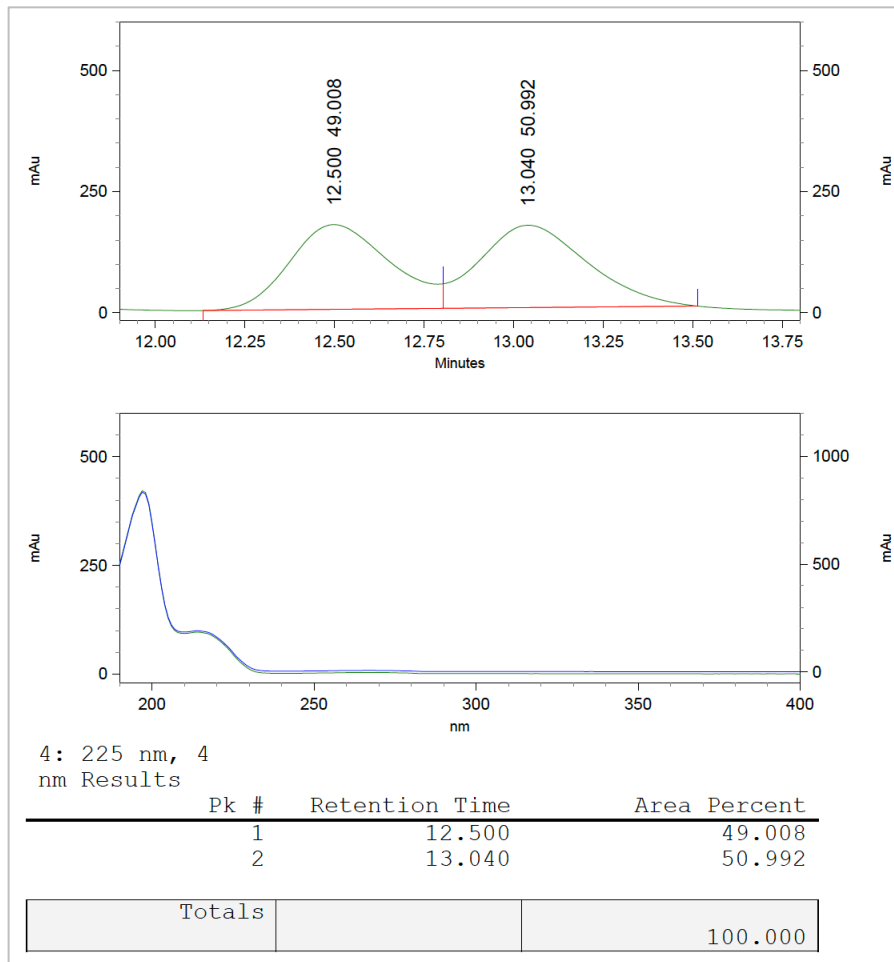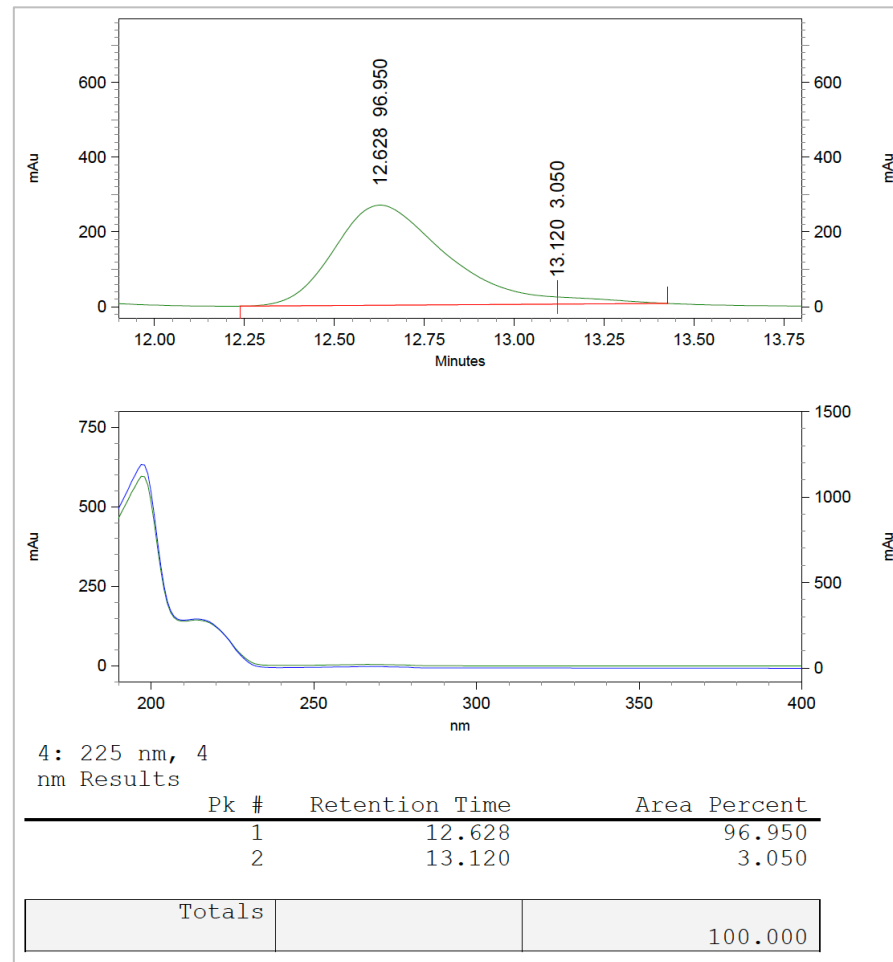

<sup>1</sup>H NMR of **3f**  
in Chloroform-*d*

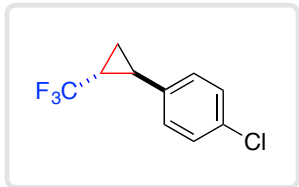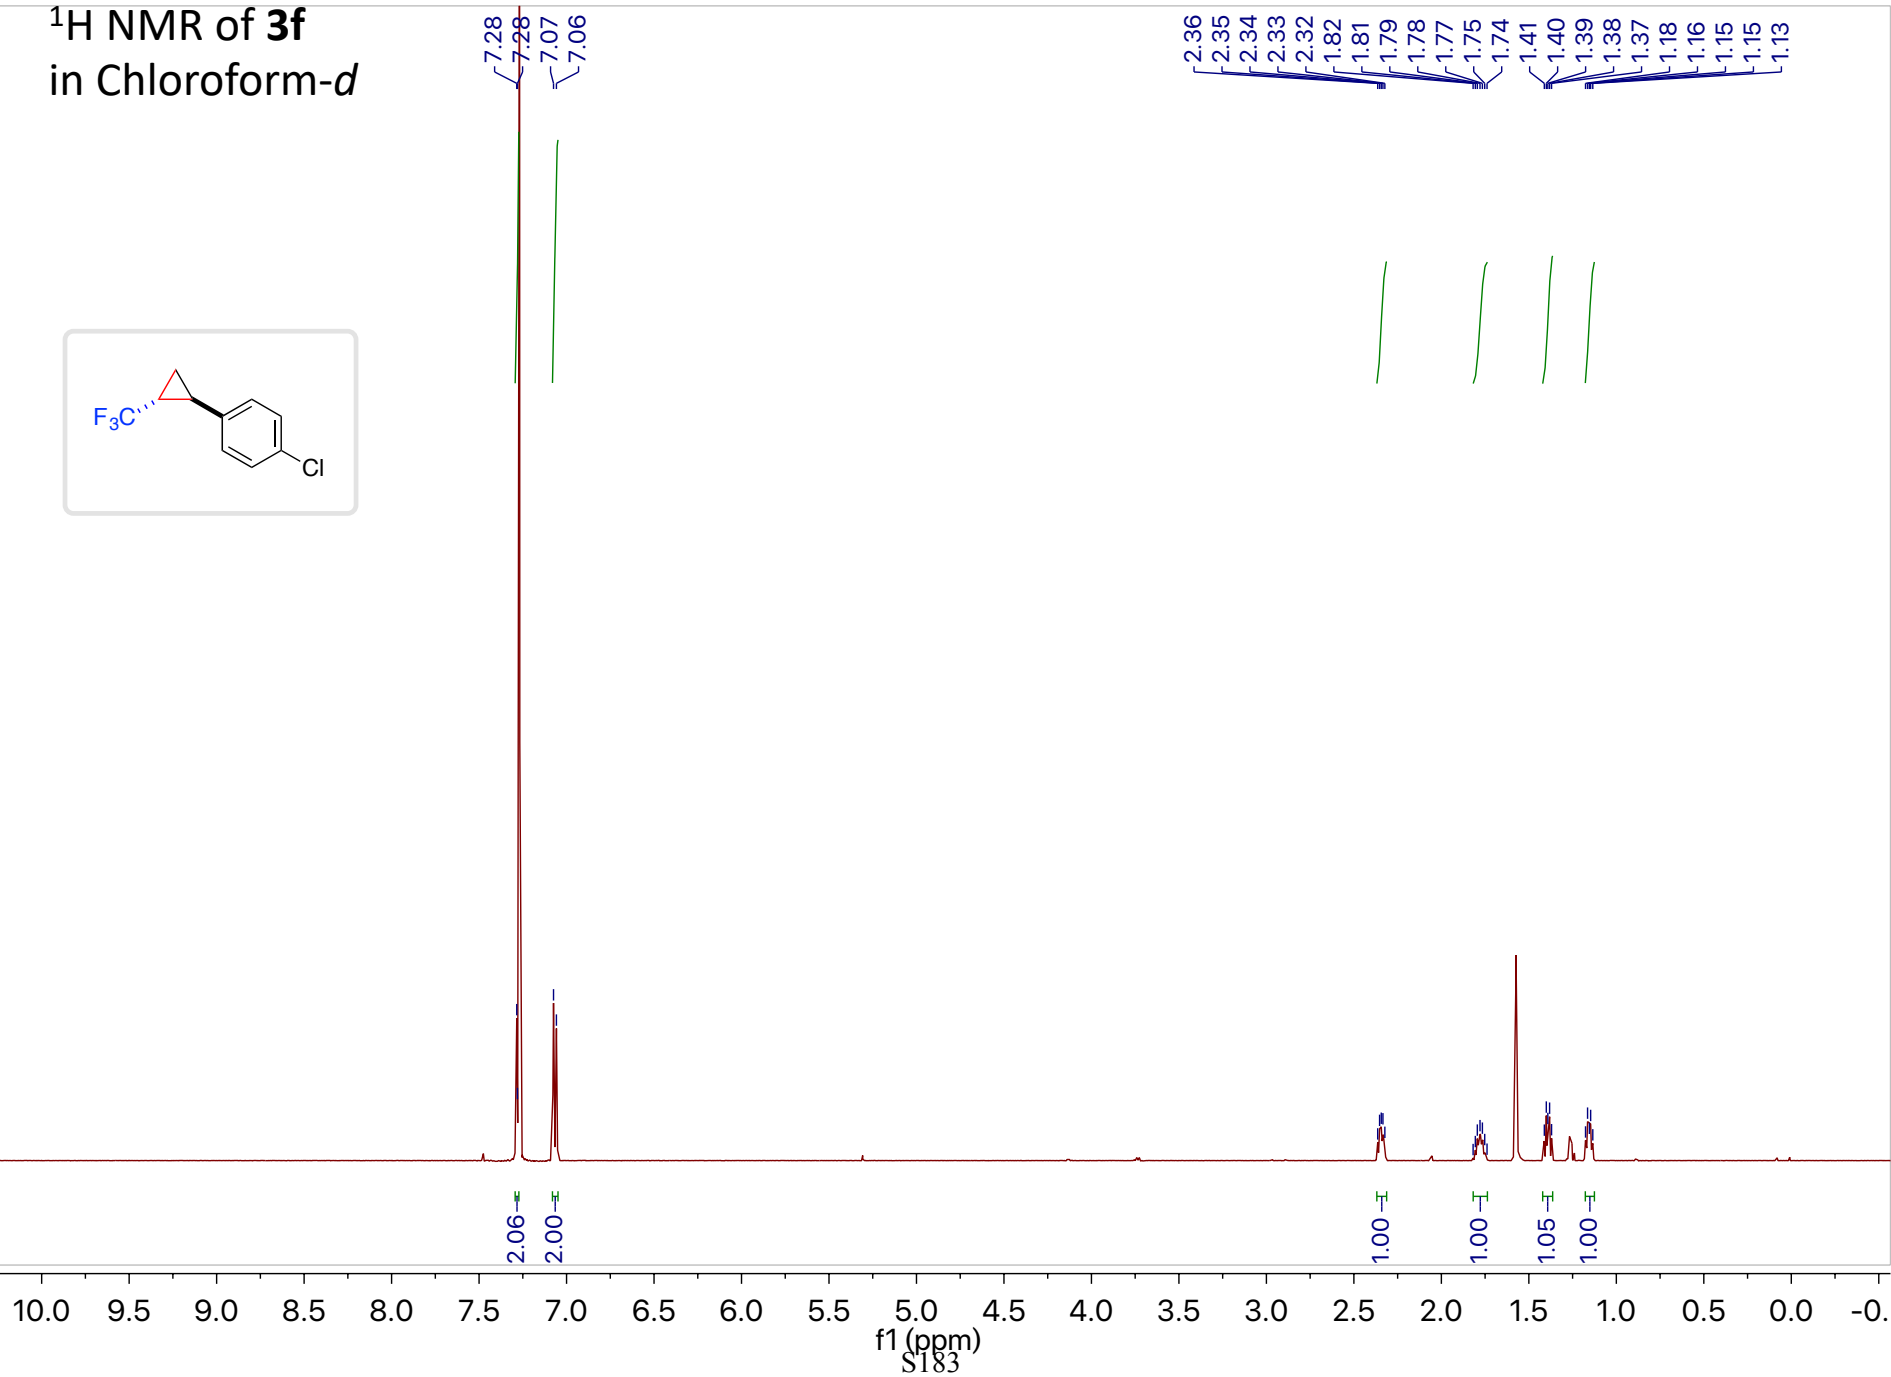



$^{13}\text{C}$  NMR of **3f**  
in Chloroform-*d*

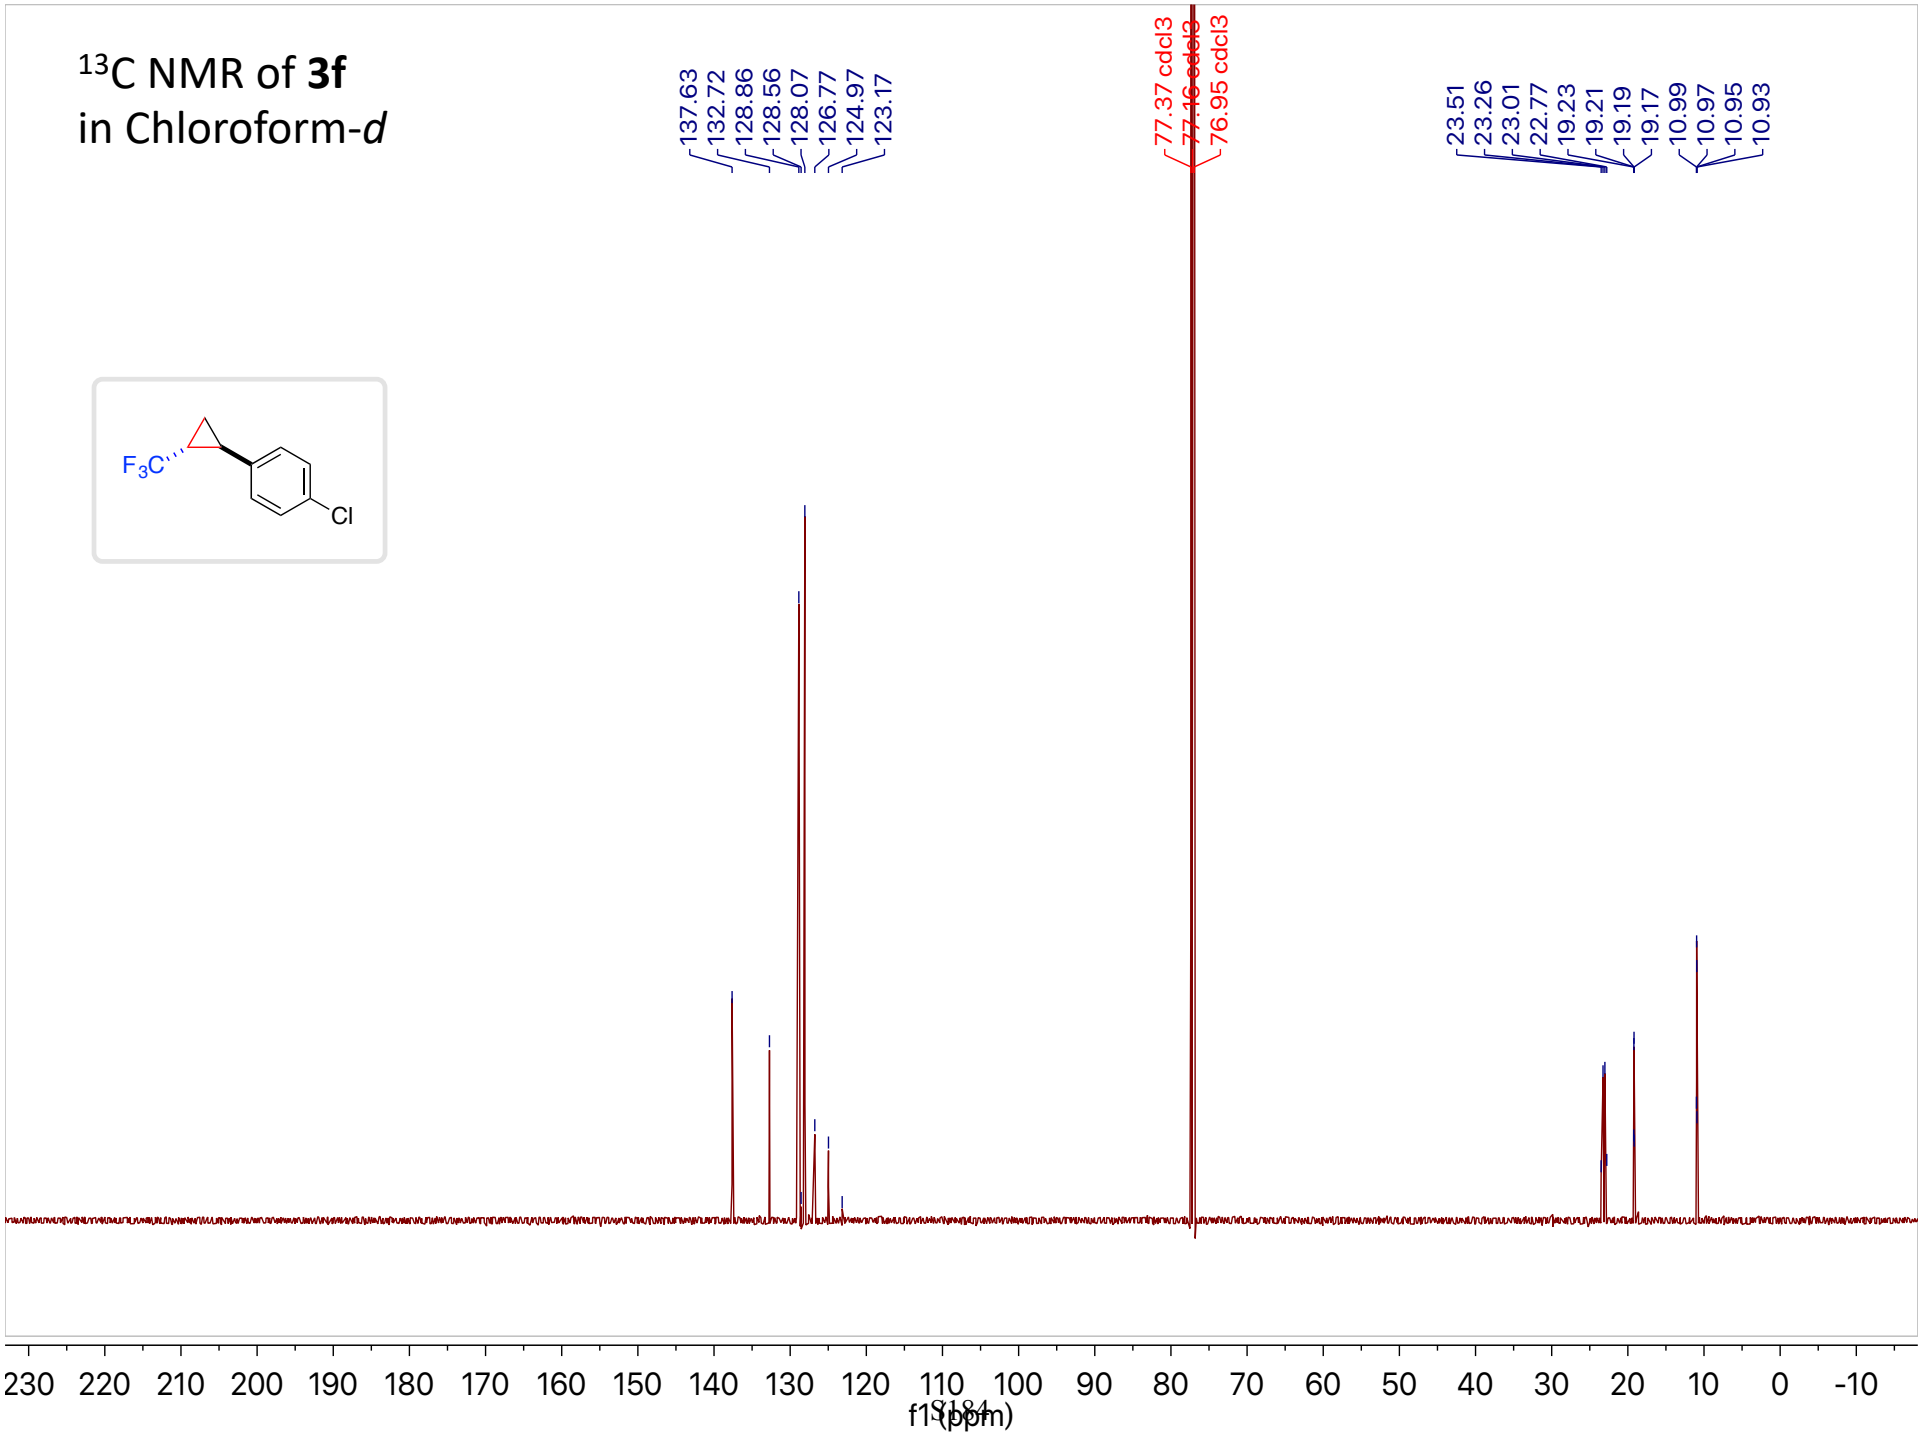

$^{19}\text{F}$  NMR of **3f**  
in Chloroform-*d*

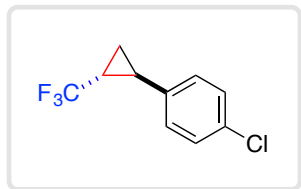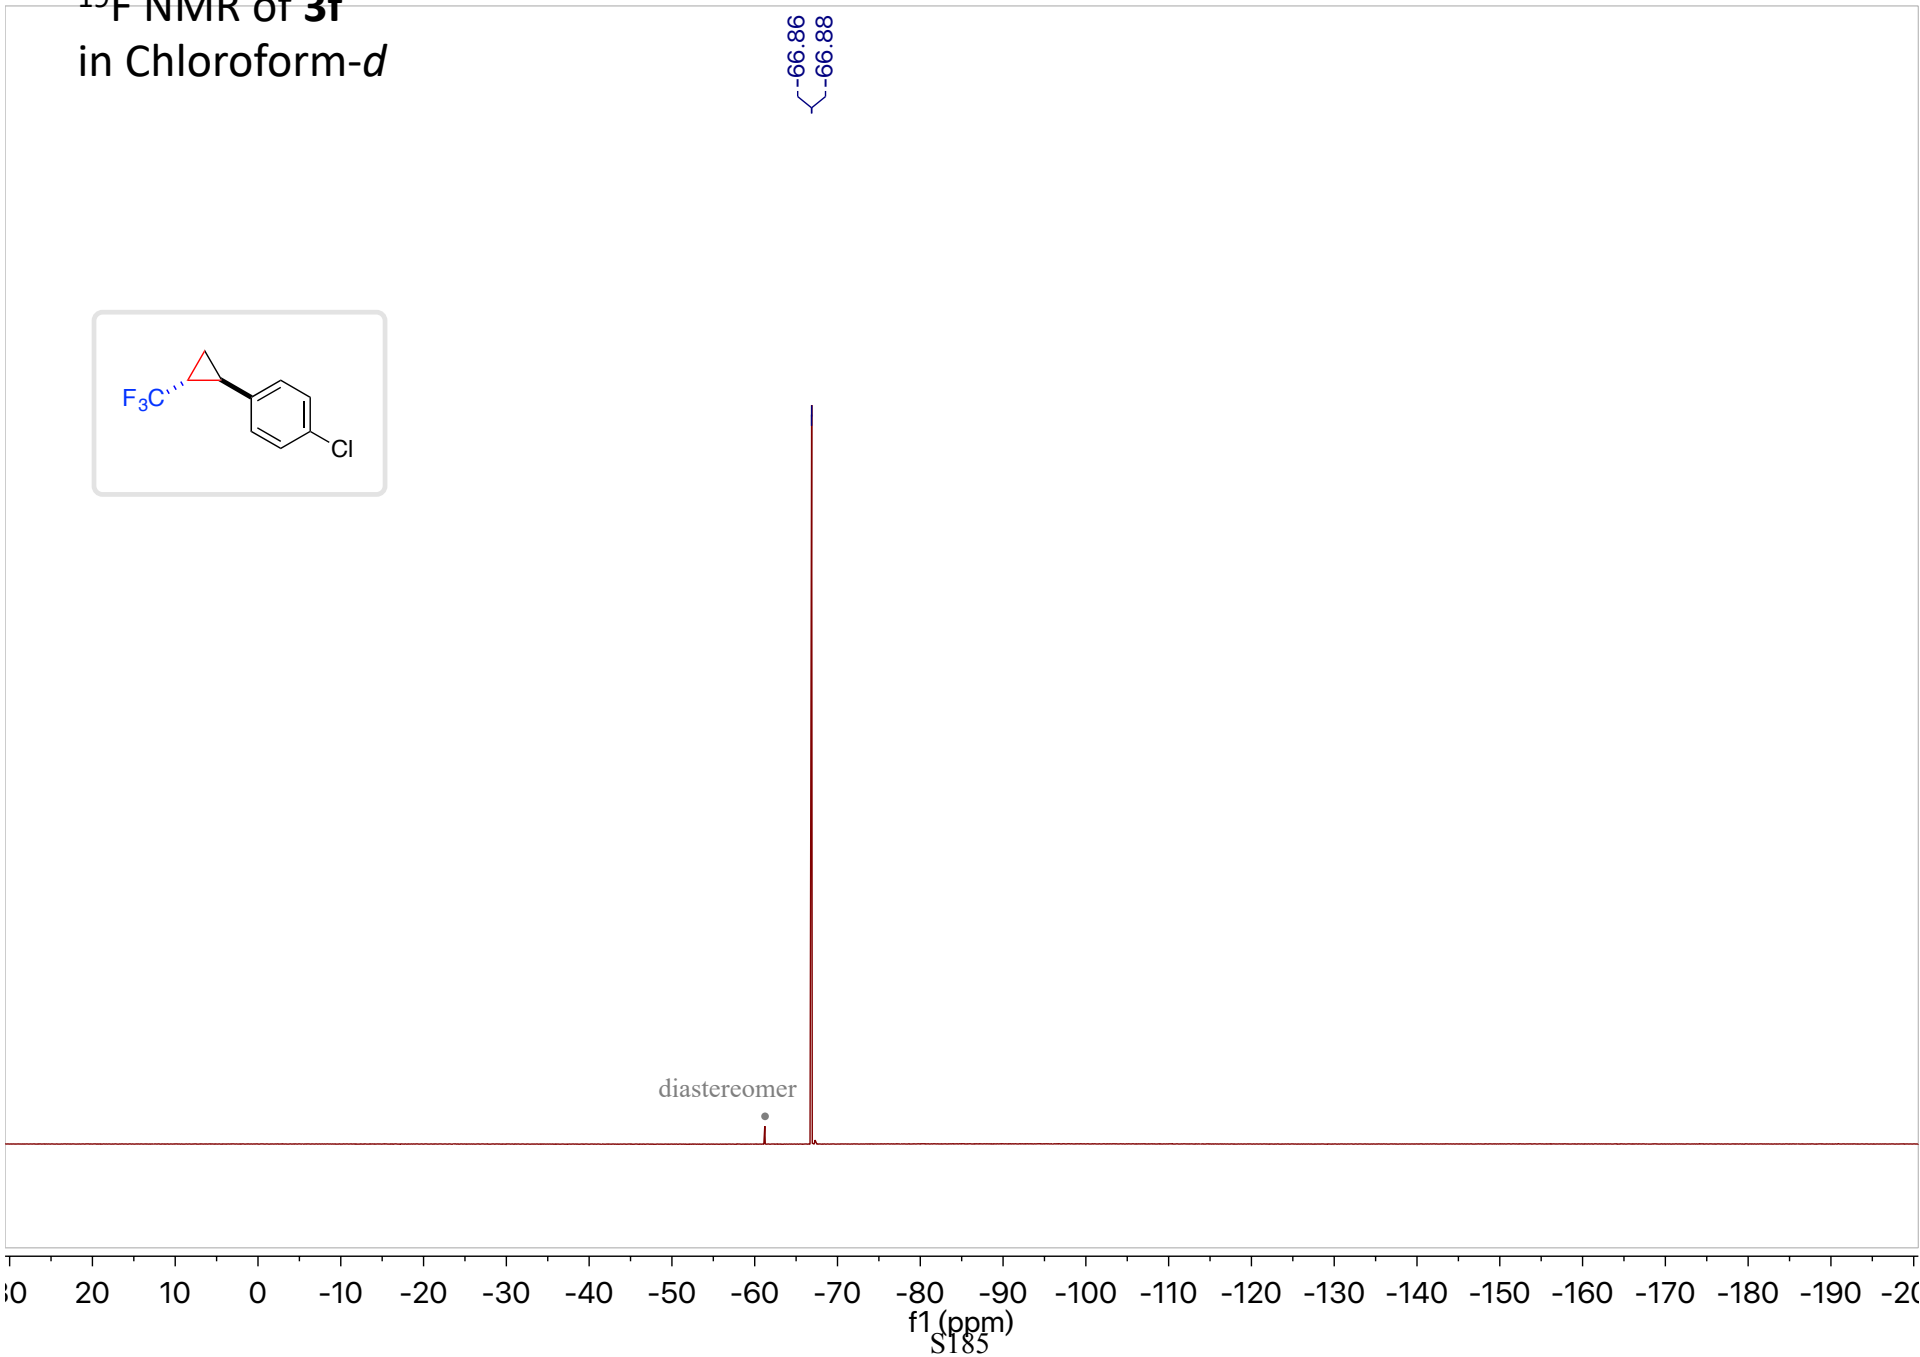

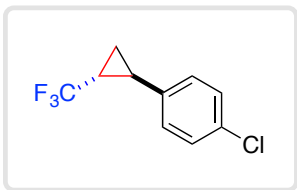

# HPLC of 3f

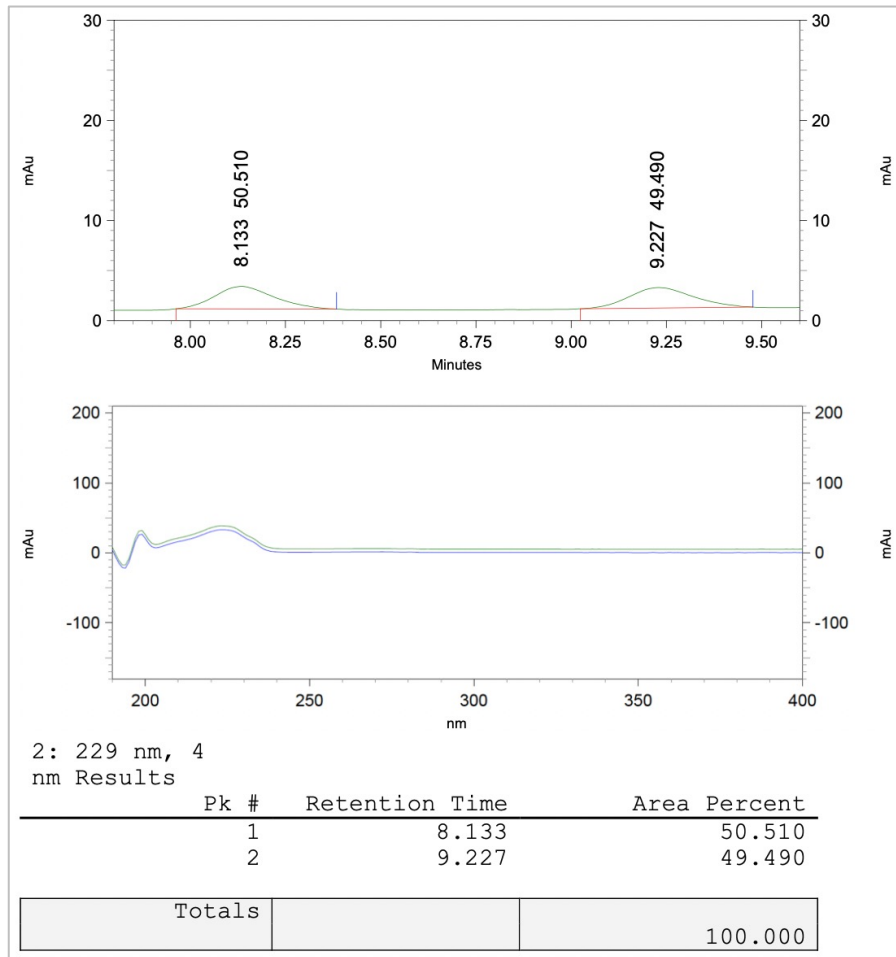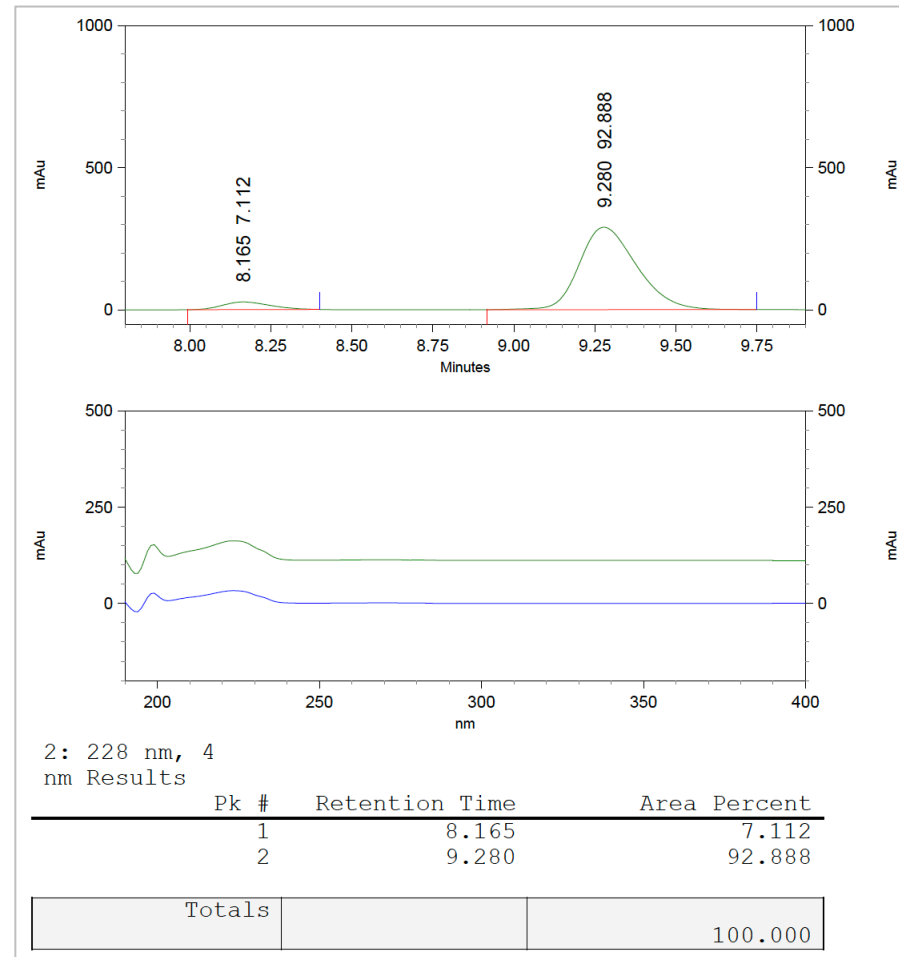

<sup>1</sup>H NMR of **3g**  
in Chloroform-*d*

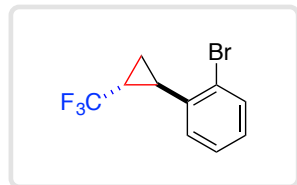

7.59  
7.57  
7.27  
7.25  
7.24  
7.13  
7.12  
7.10  
7.03  
7.02

2.59  
2.58  
2.57  
2.56  
2.55  
1.84  
1.83  
1.81  
1.80  
1.78  
1.77  
1.76  
1.45  
1.44  
1.43  
1.42  
1.41  
1.19  
1.18  
1.16  
1.15

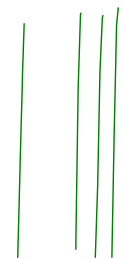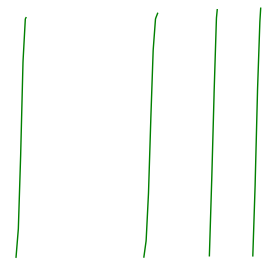

0.97  
1.02  
1.01  
1.04

1.00  
1.02  
1.03  
1.04

10.0 9.5 9.0 8.5 8.0 7.5 7.0 6.5 6.0 5.5 5.0 4.5 4.0 3.5 3.0 2.5 2.0 1.5 1.0 0.5 0.0 -0.5

f1 (ppm)  
S187

$^{13}\text{C}$  NMR of **3g**  
in Chloroform-*d*

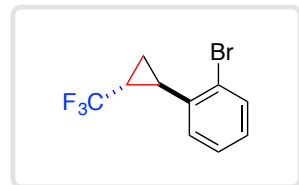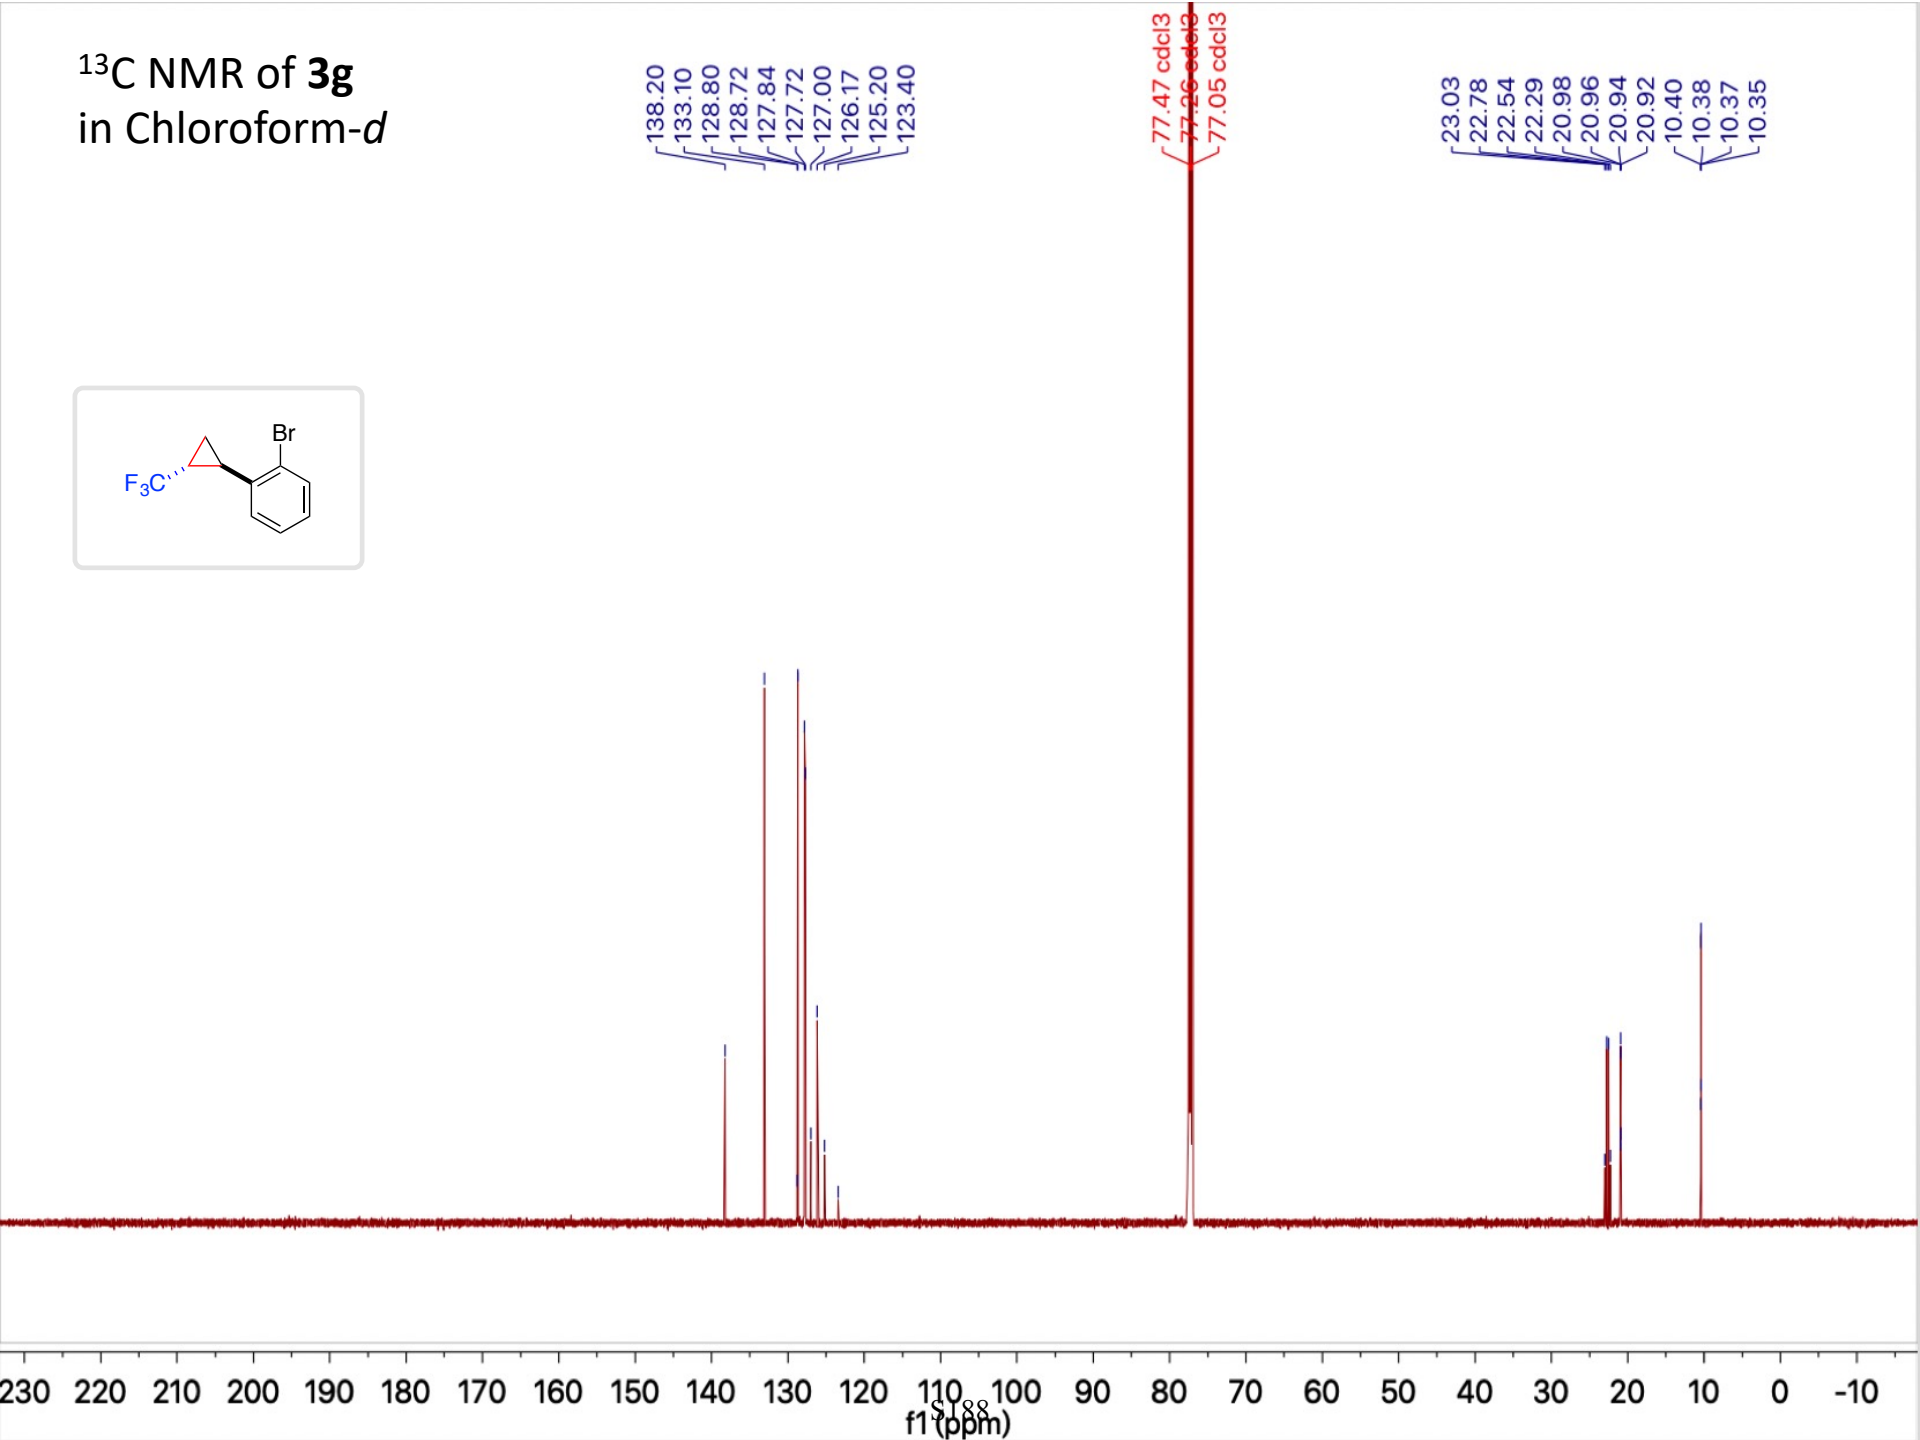

$^{19}\text{F}$  NMR of **3g**  
in Chloroform-*d*

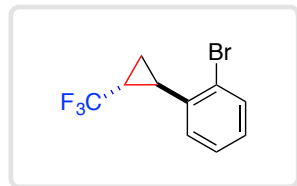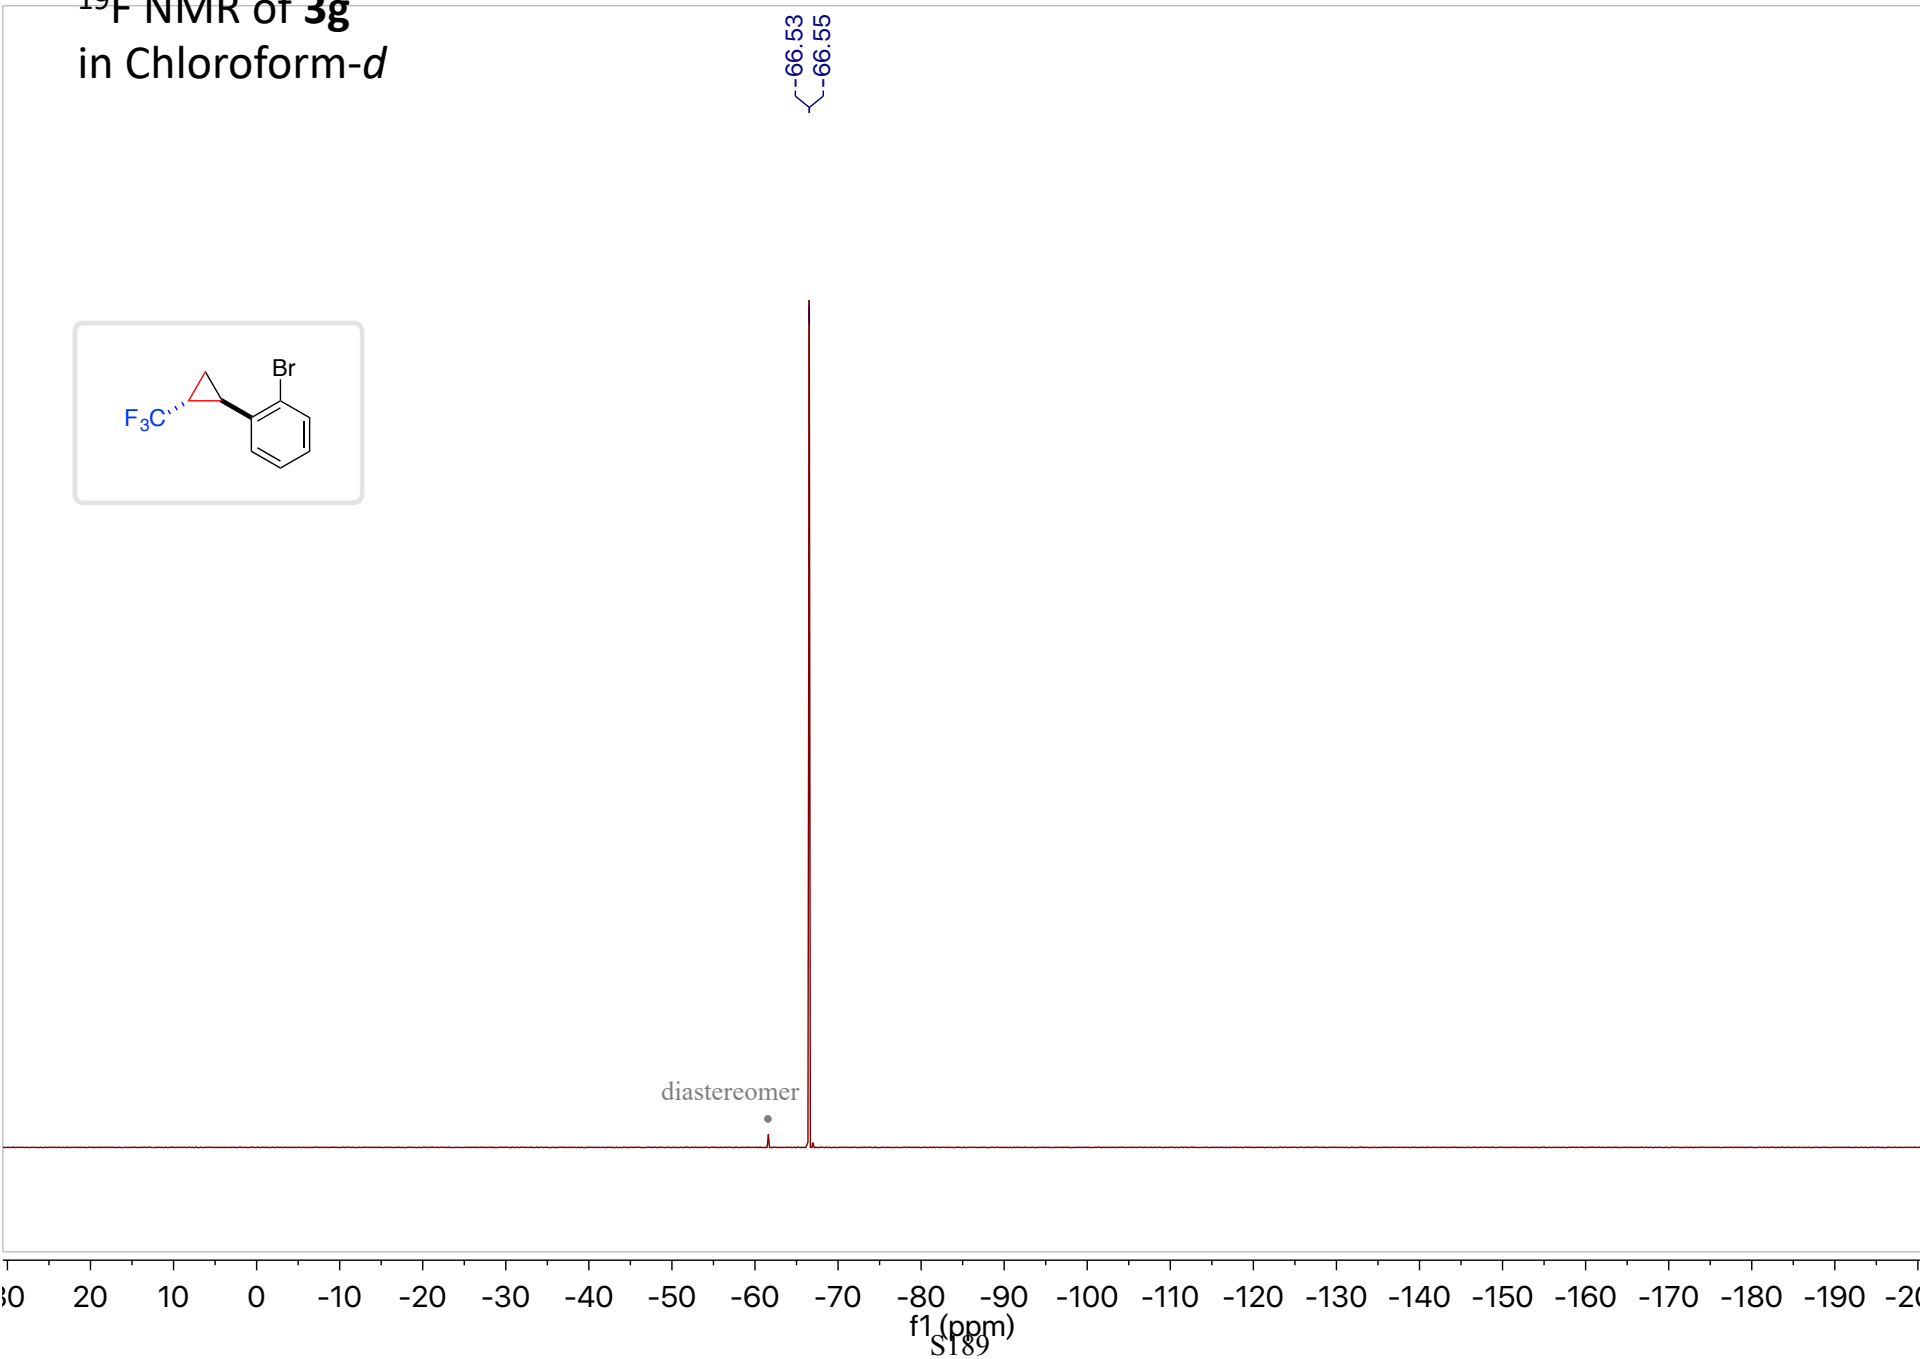

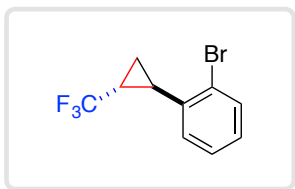

# HPLC of 3g

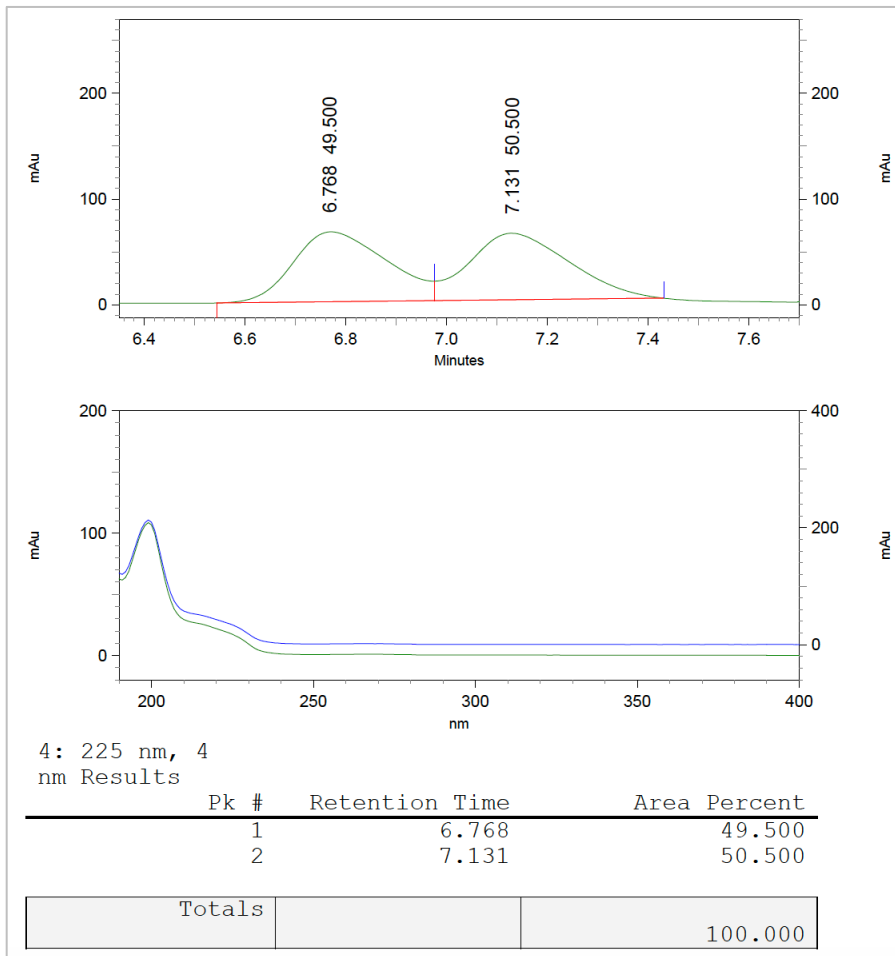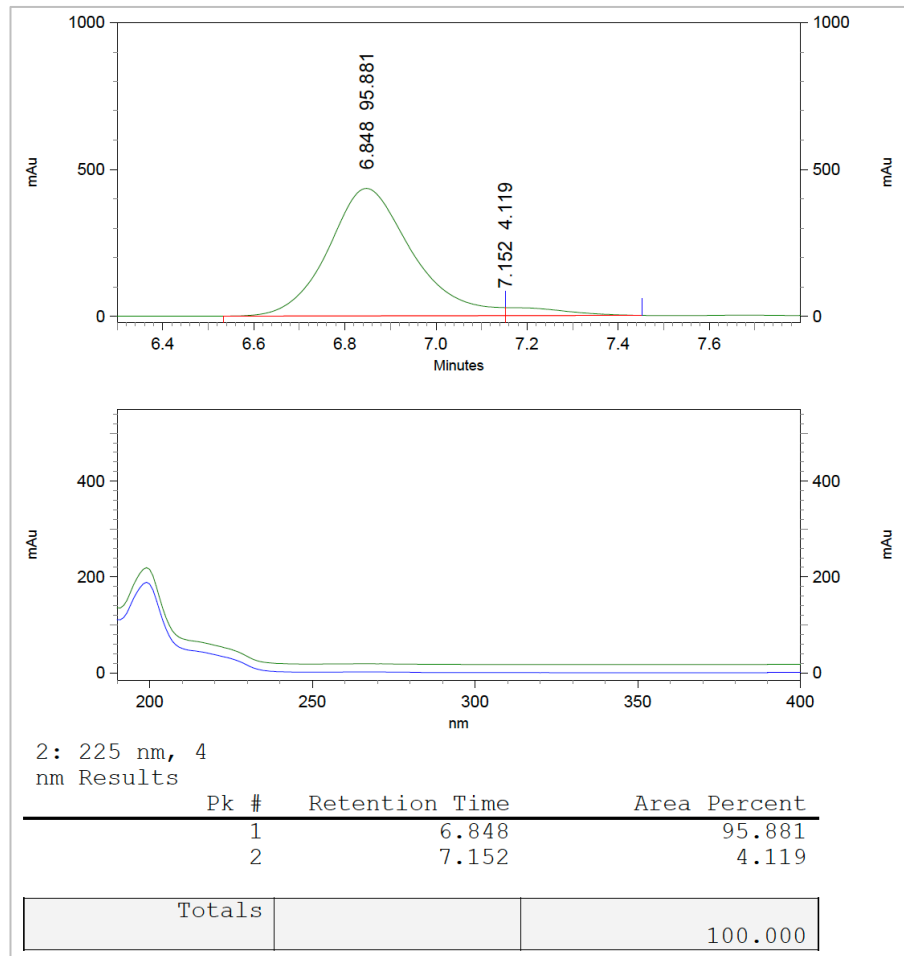





$^{13}\text{C}$  NMR of **3h**  
in Chloroform-*d*

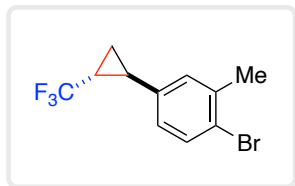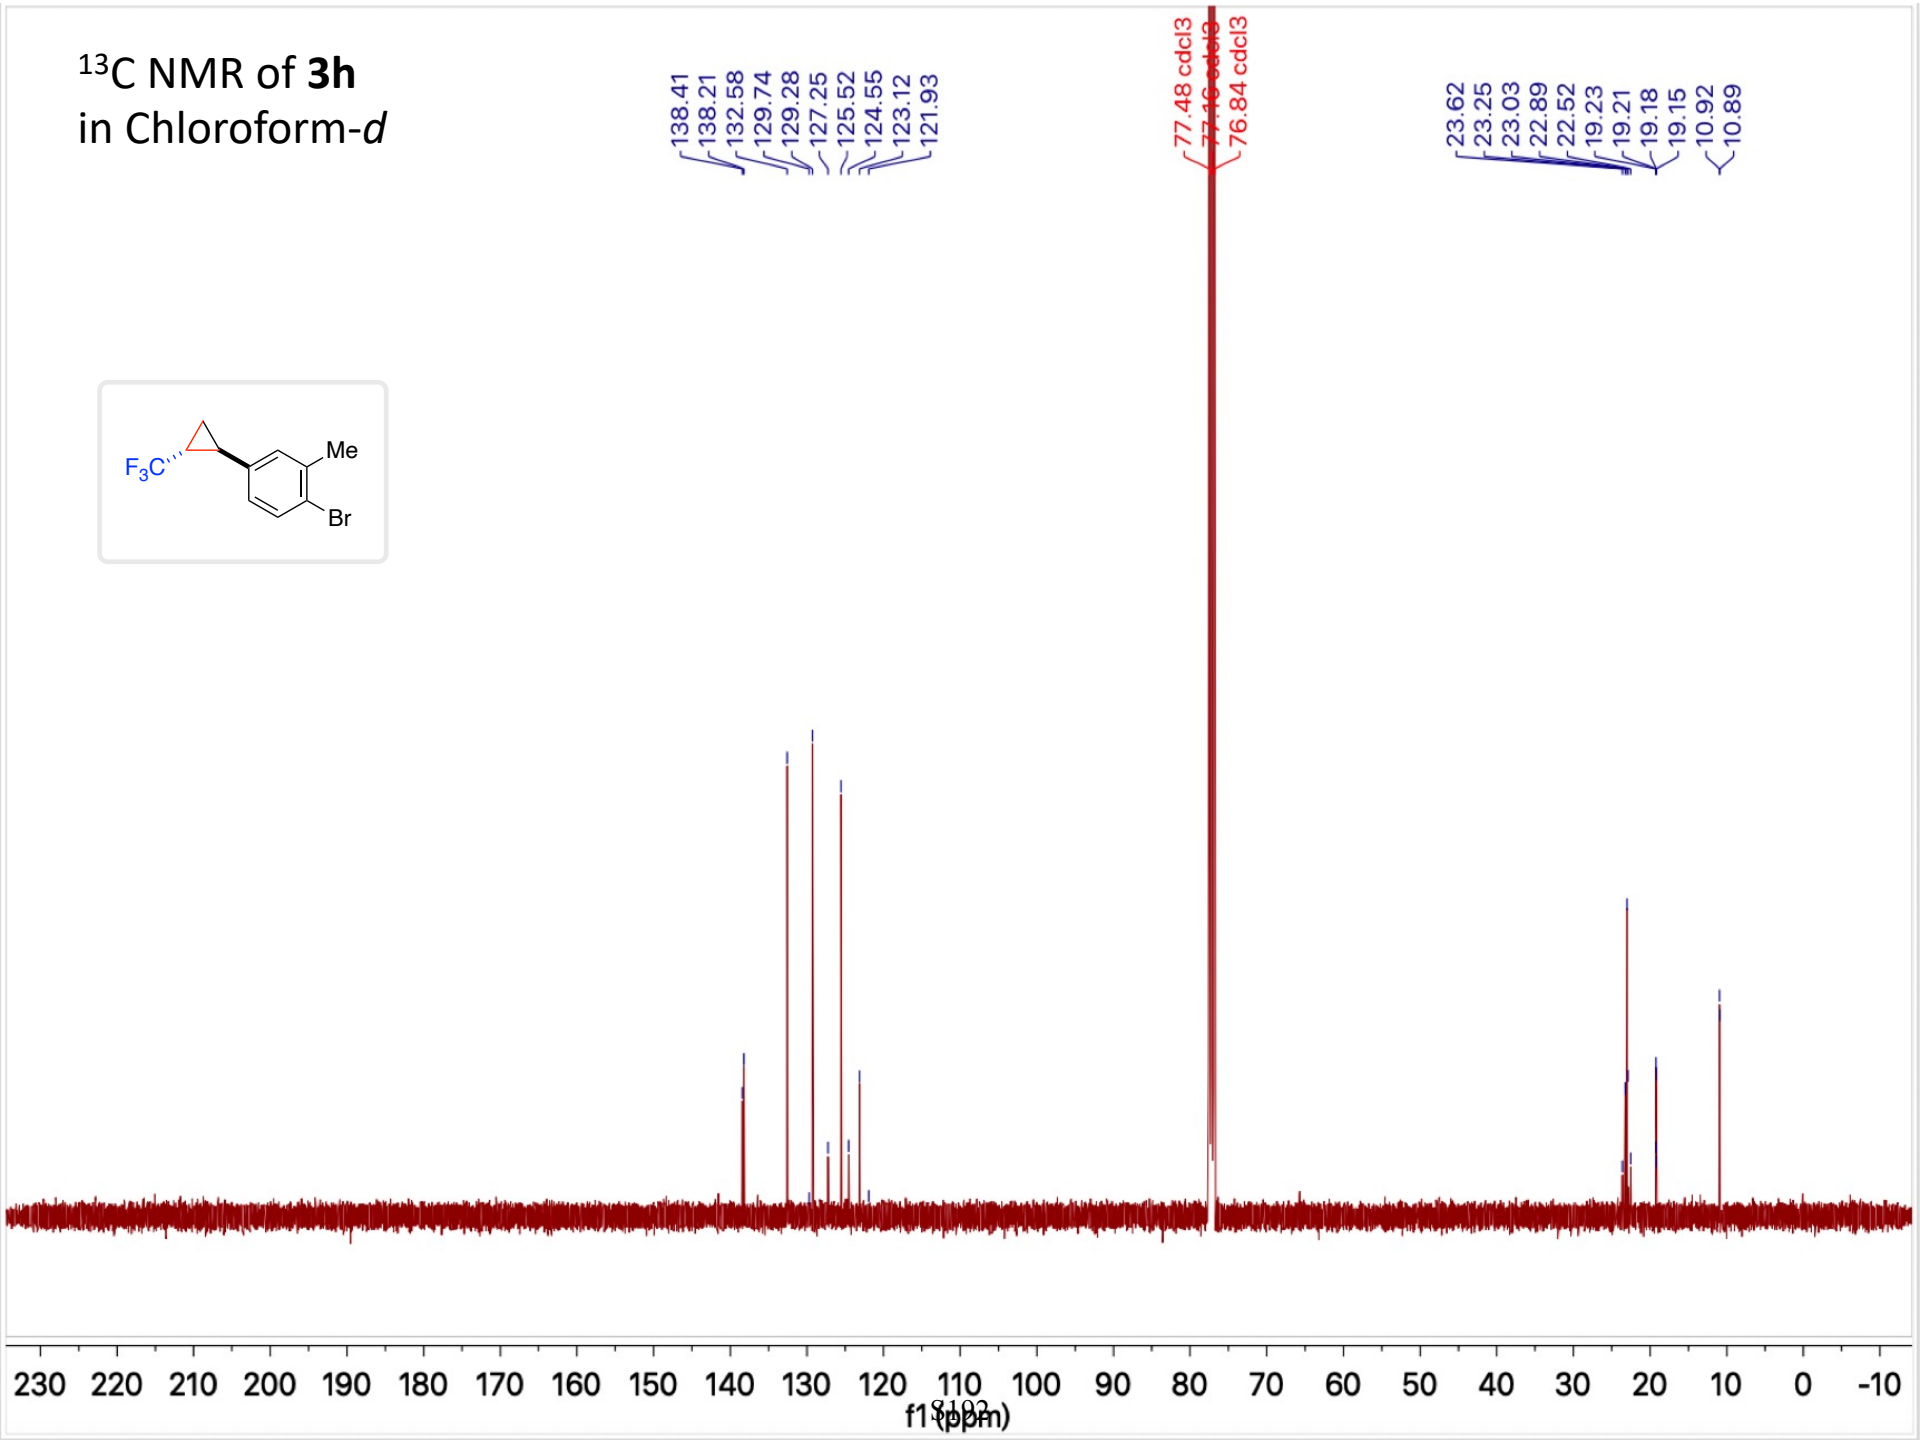

$^{19}\text{F}$  NMR of **3h**  
in Chloroform-*d*

66.85  
66.86

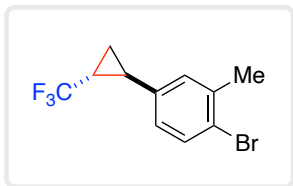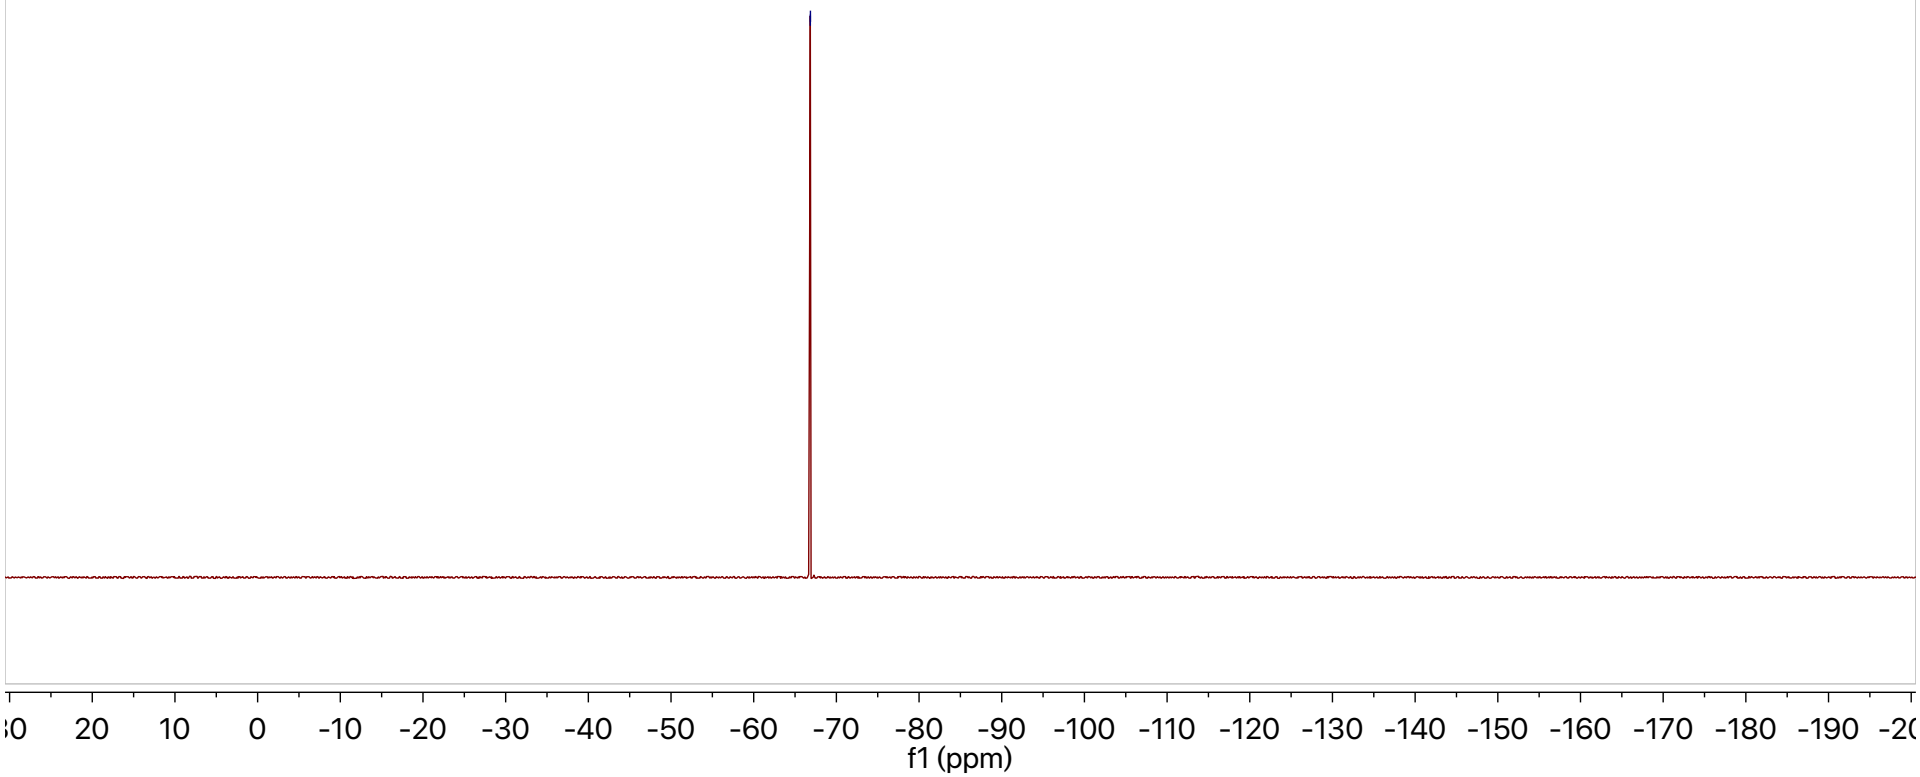

# HPLC of 3h

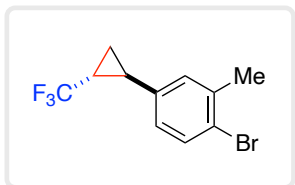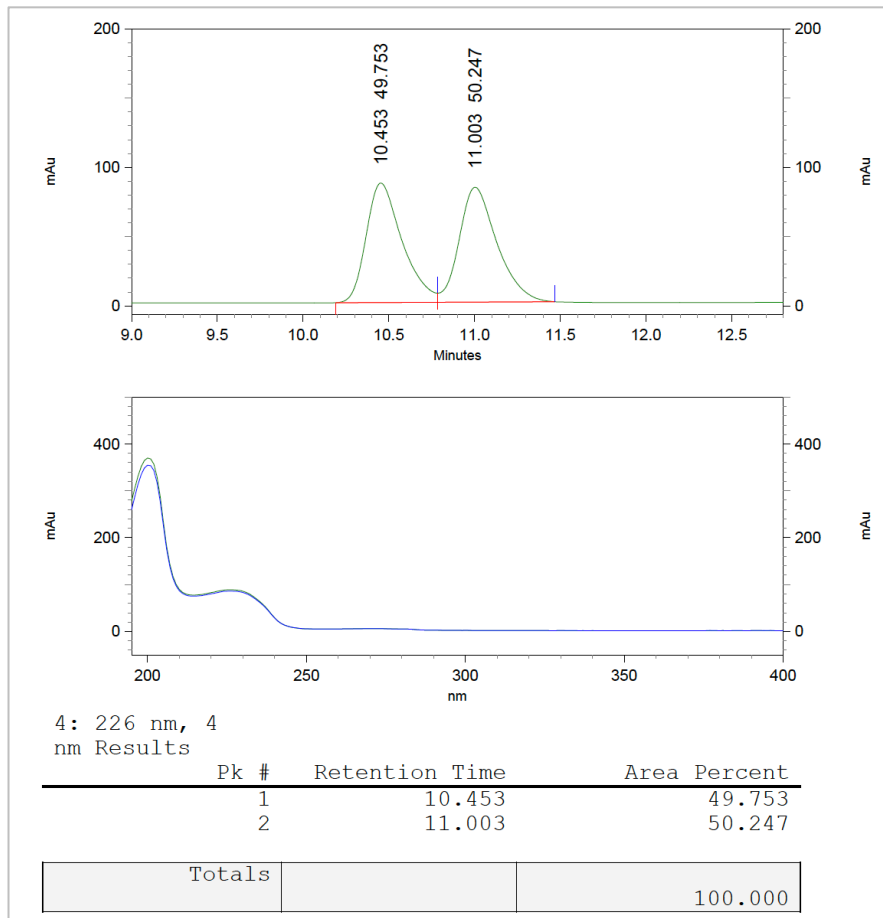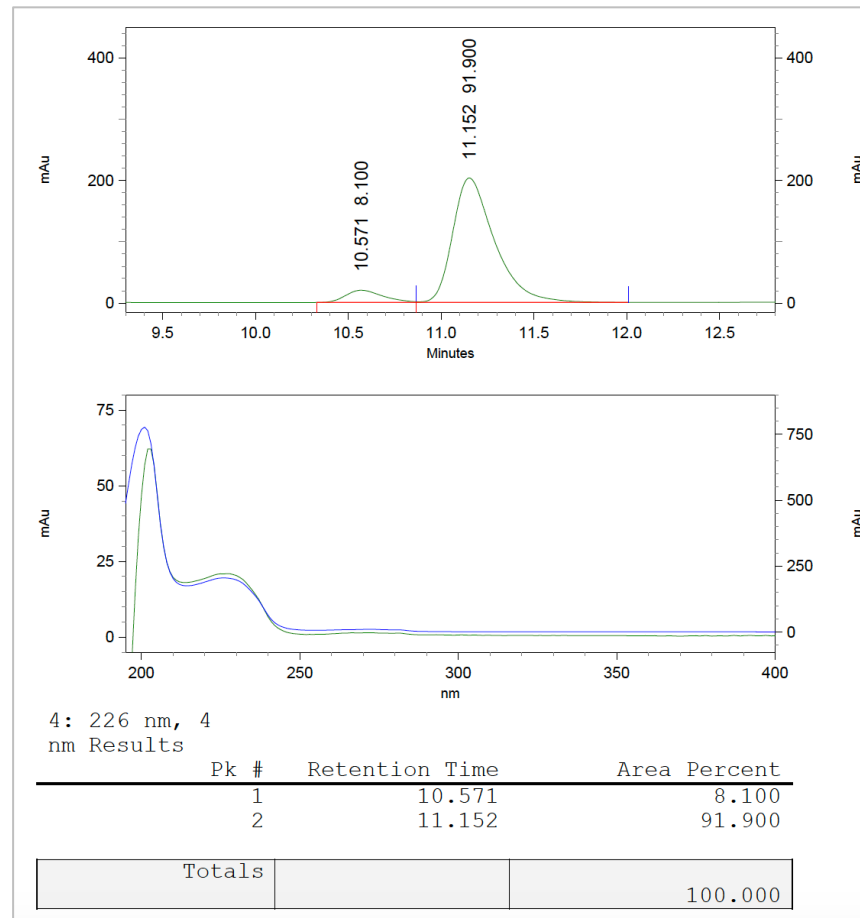

<sup>1</sup>H NMR of **3i**  
in Chloroform-*d*

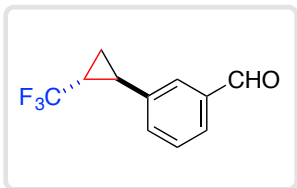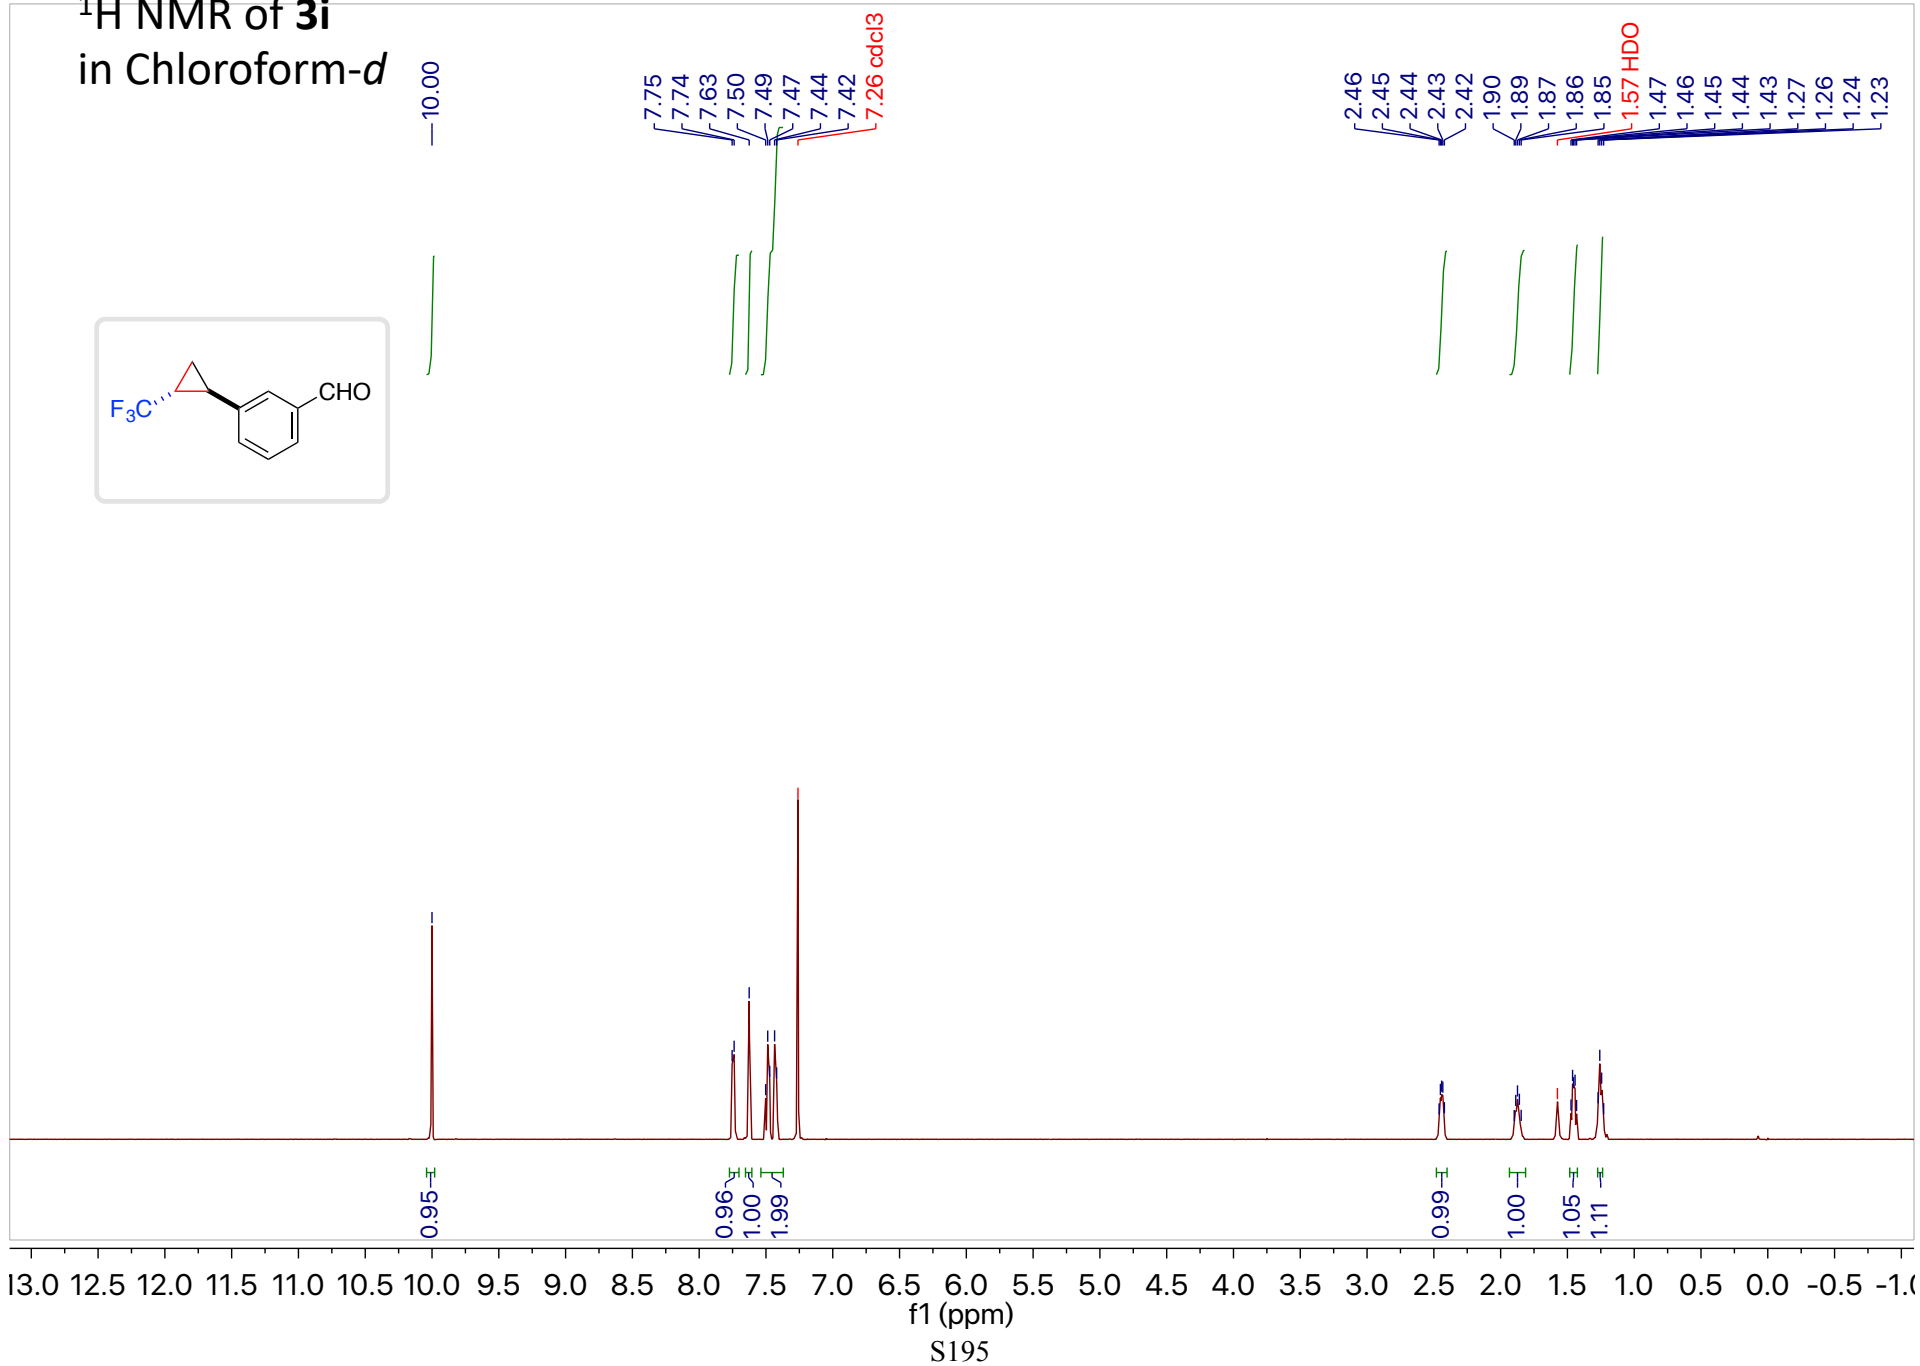

$^{13}\text{C}$  NMR of **3i**  
in Chloroform-*d*

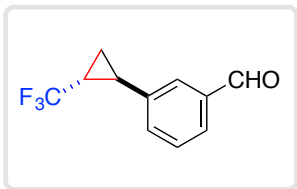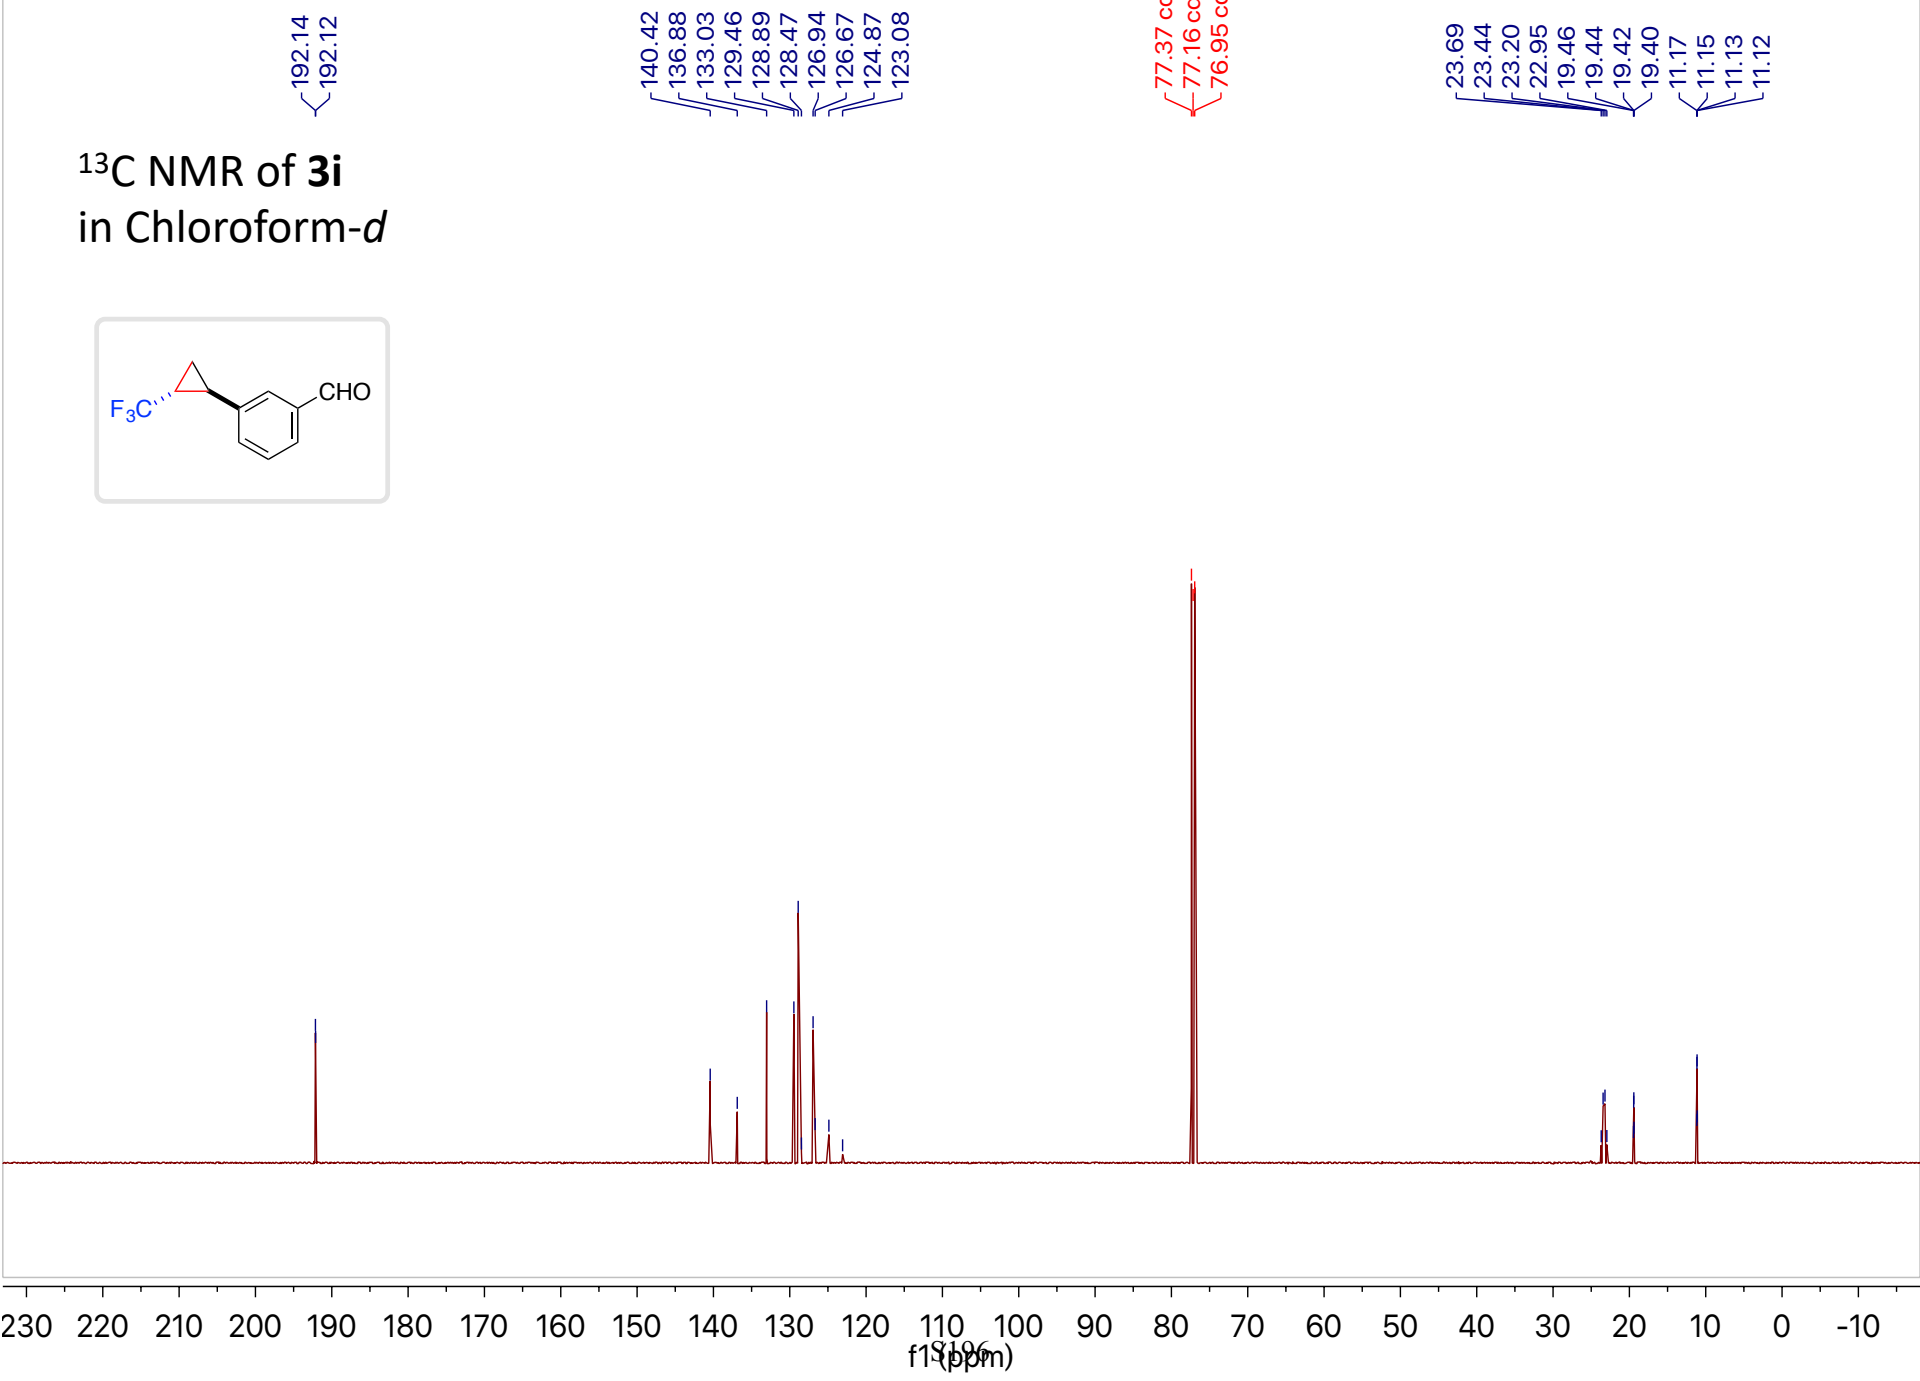

$^{19}\text{F}$  NMR of **3i**  
in Chloroform-*d*

-66.90  
-66.91

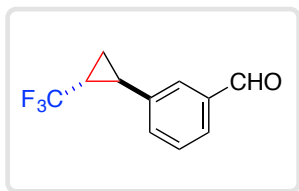

0 20 10 0 -10 -20 -30 -40 -50 -60 -70 -80 -90 -100 -110 -120 -130 -140 -150 -160 -170 -180 -190 -200

f1 (ppm)

S197

# HPLC of 3i

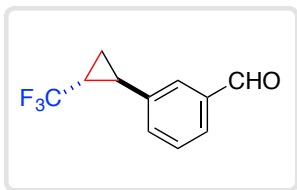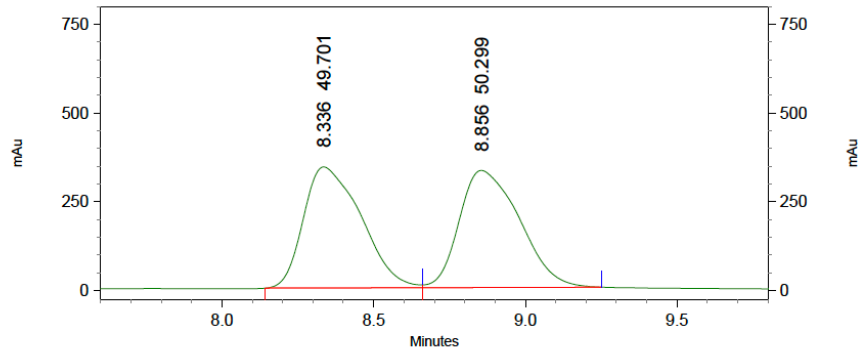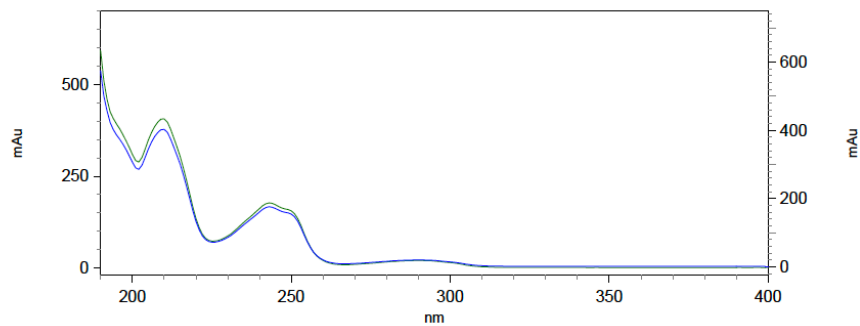

3: 219 nm, 4 nm Results

| Pk # | Retention Time | Area Percent |
|------|----------------|--------------|
| 1    | 8.336          | 49.701       |
| 2    | 8.856          | 50.299       |

|        |         |
|--------|---------|
| Totals | 100.000 |
|--------|---------|

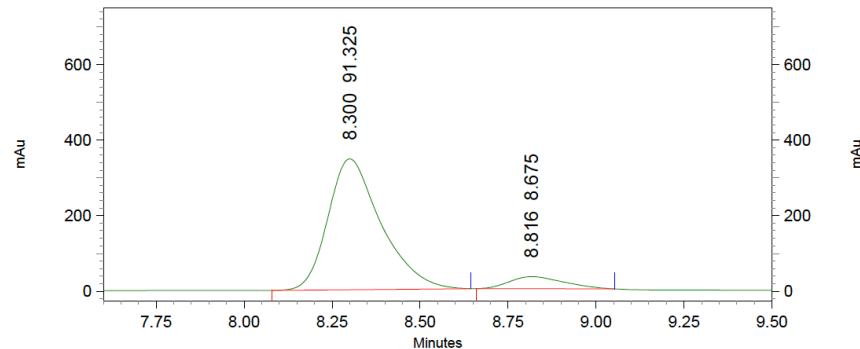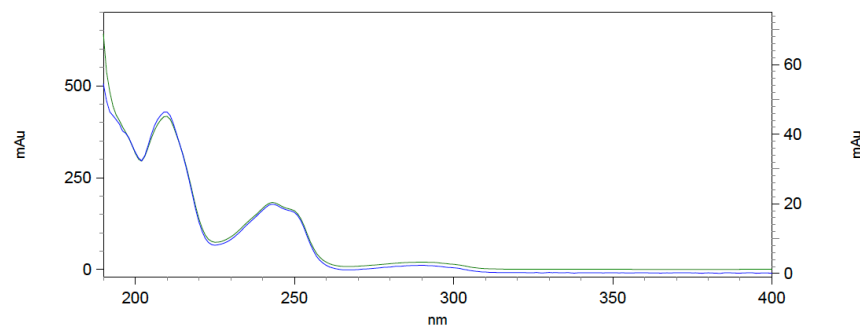

3: 219 nm, 4 nm Results

| Pk # | Retention Time | Area Percent |
|------|----------------|--------------|
| 1    | 8.300          | 91.325       |
| 2    | 8.816          | 8.675        |

|        |         |
|--------|---------|
| Totals | 100.000 |
|--------|---------|

<sup>1</sup>H NMR of **3j**  
in Chloroform-*d*

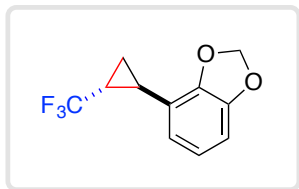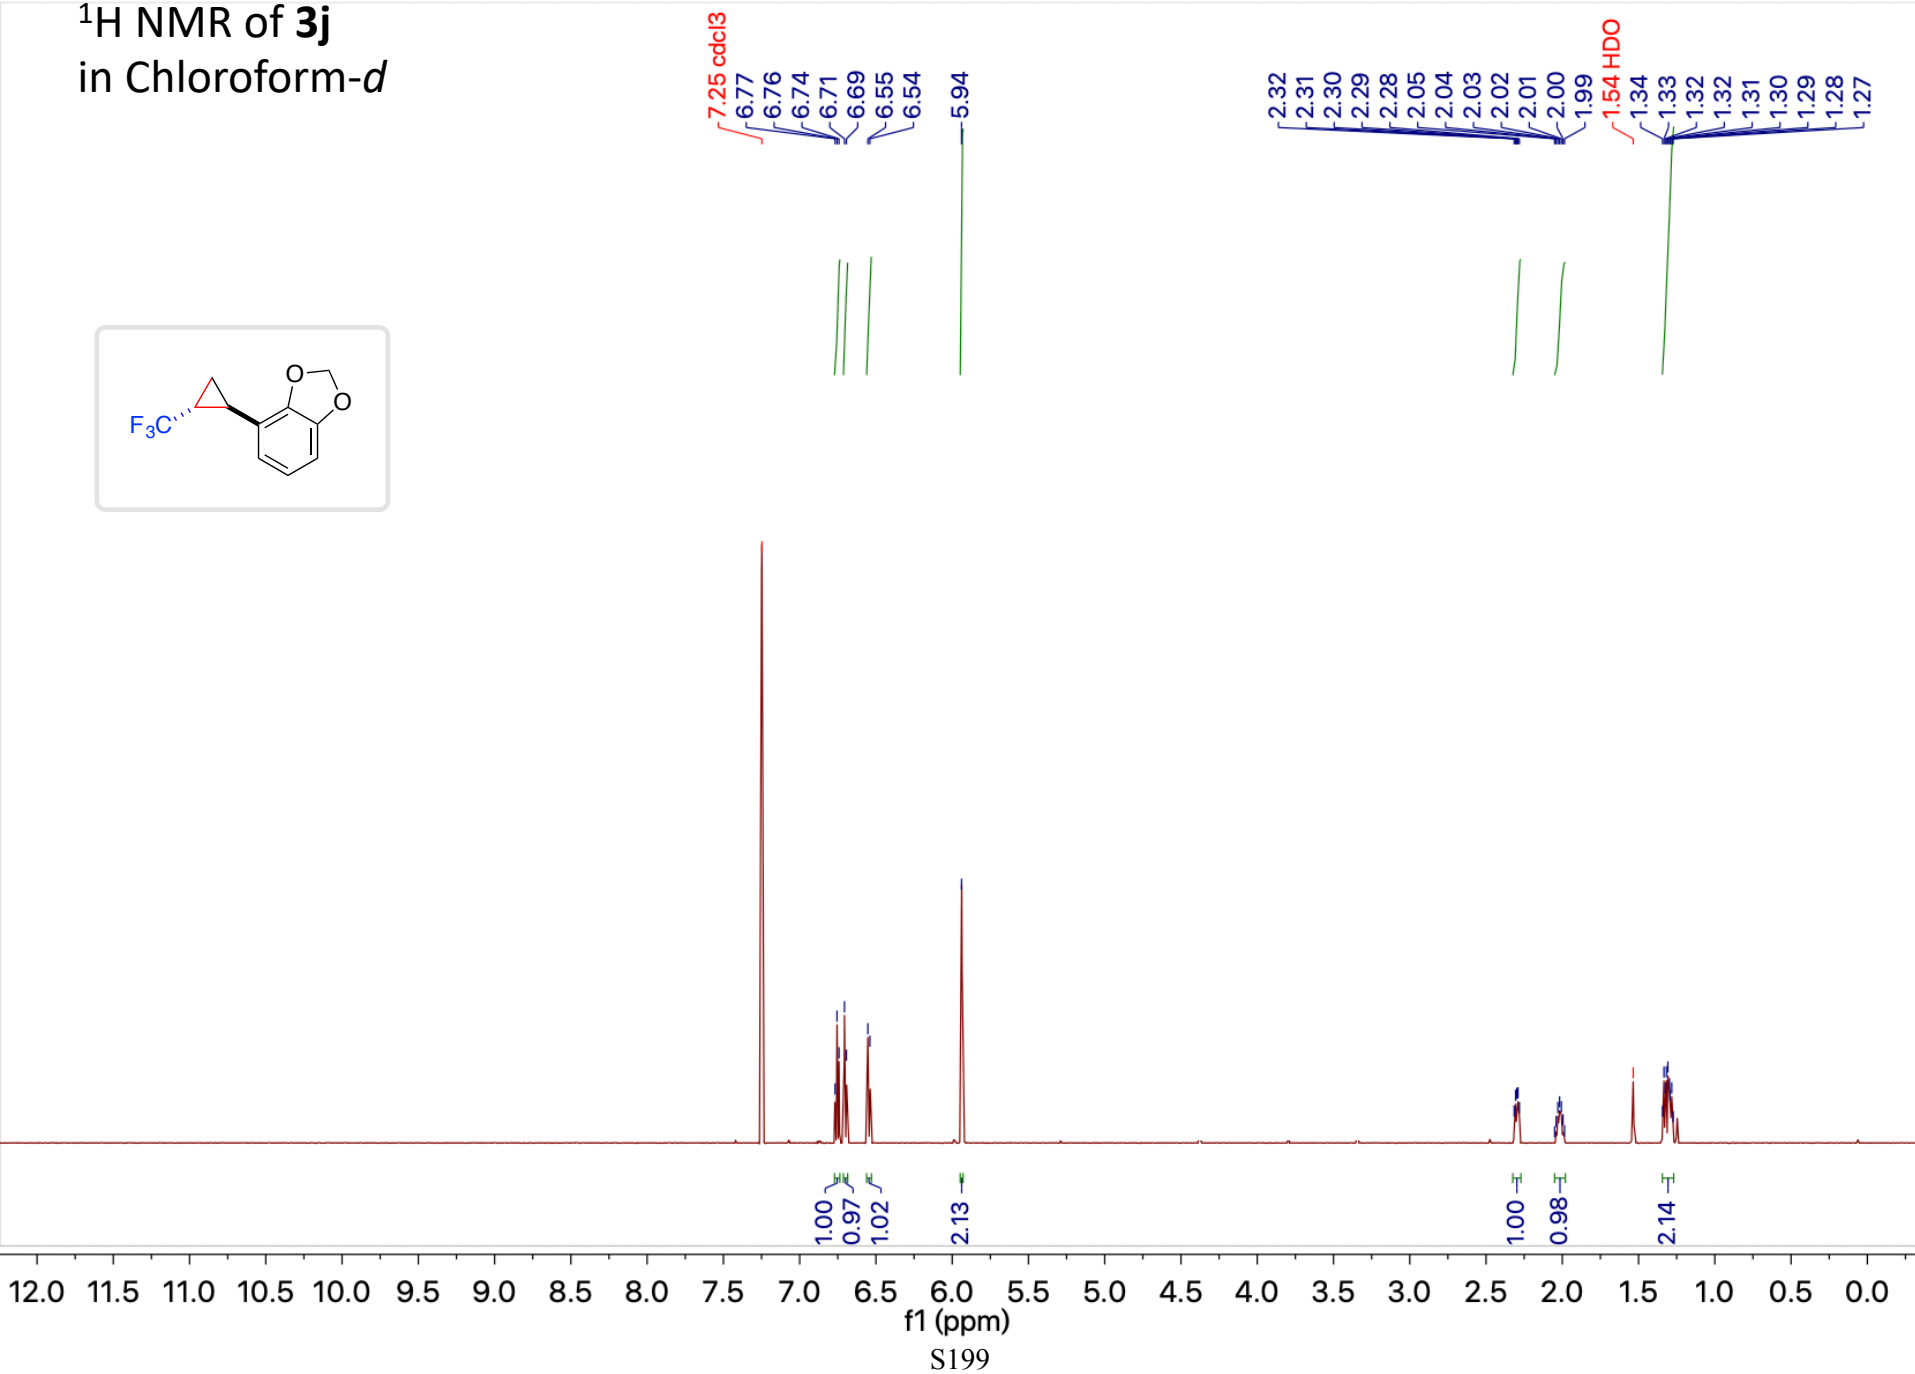



$^{13}\text{C}$  NMR of **3j**  
in Chloroform-*d*

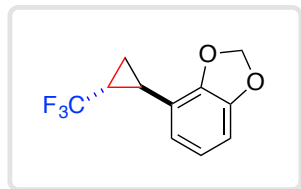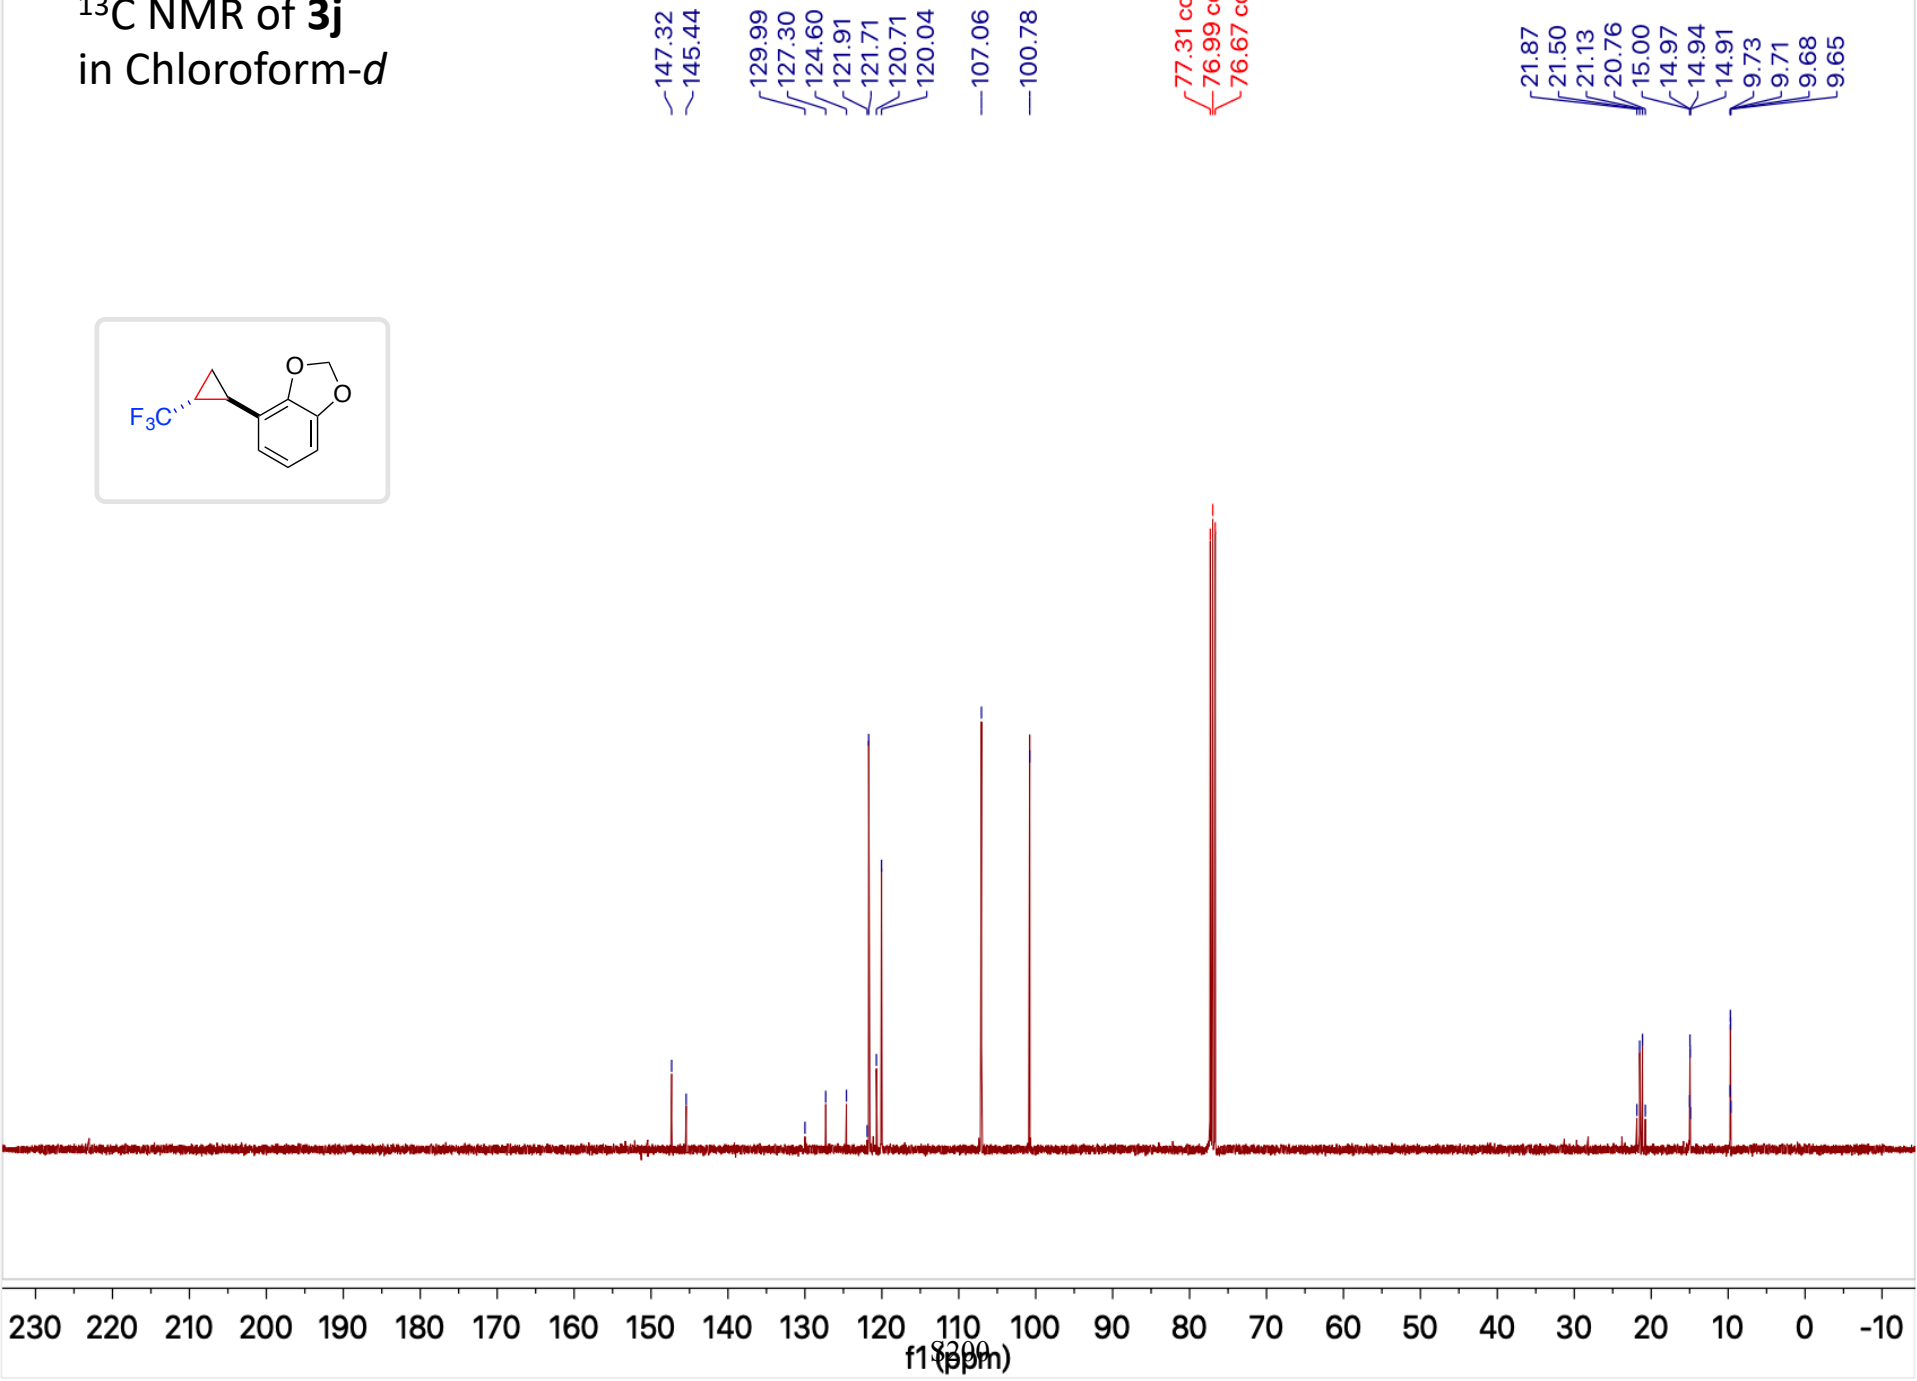

$^{19}\text{F}$  NMR of **3j**  
in Chloroform-*d*

-67.01  
-67.02

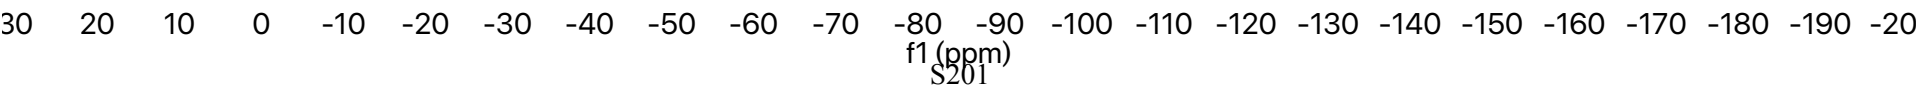

# HPLC of 3j

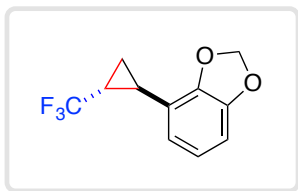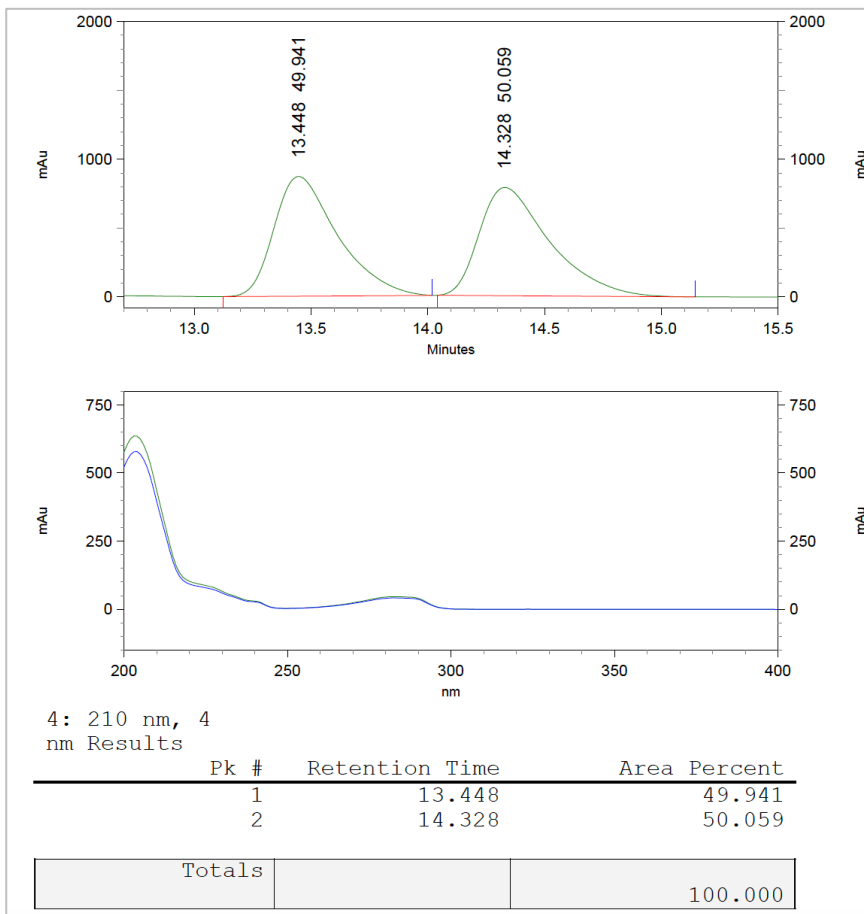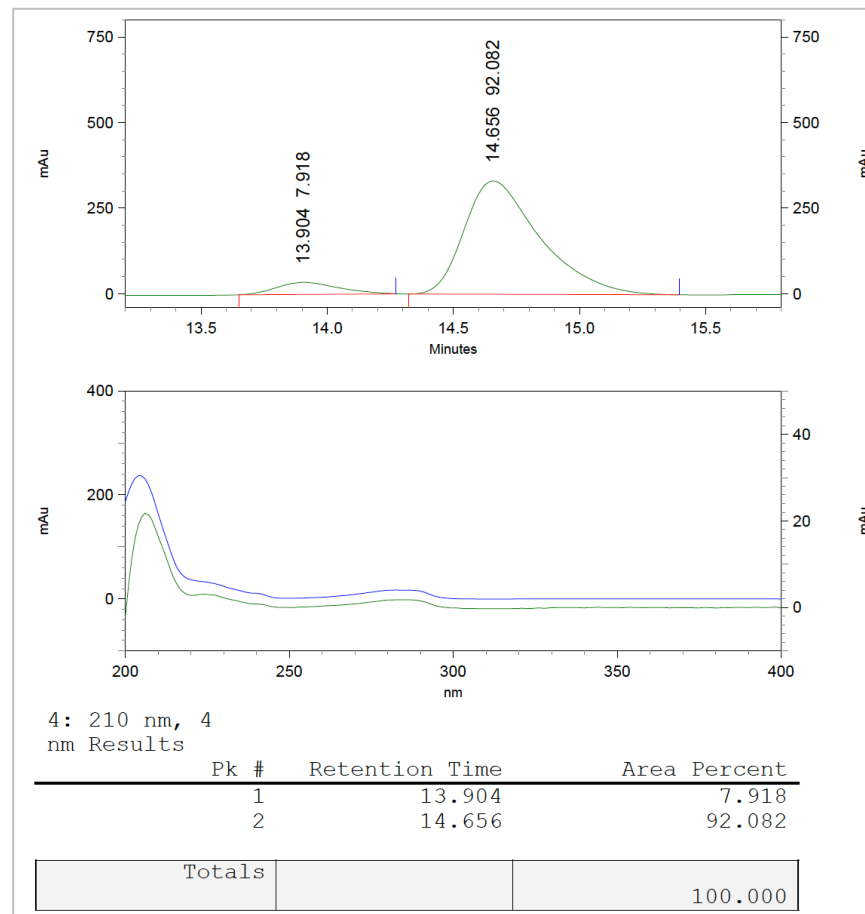

<sup>1</sup>H NMR of **3k**  
in Chloroform-*d*

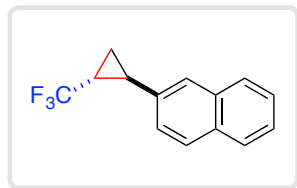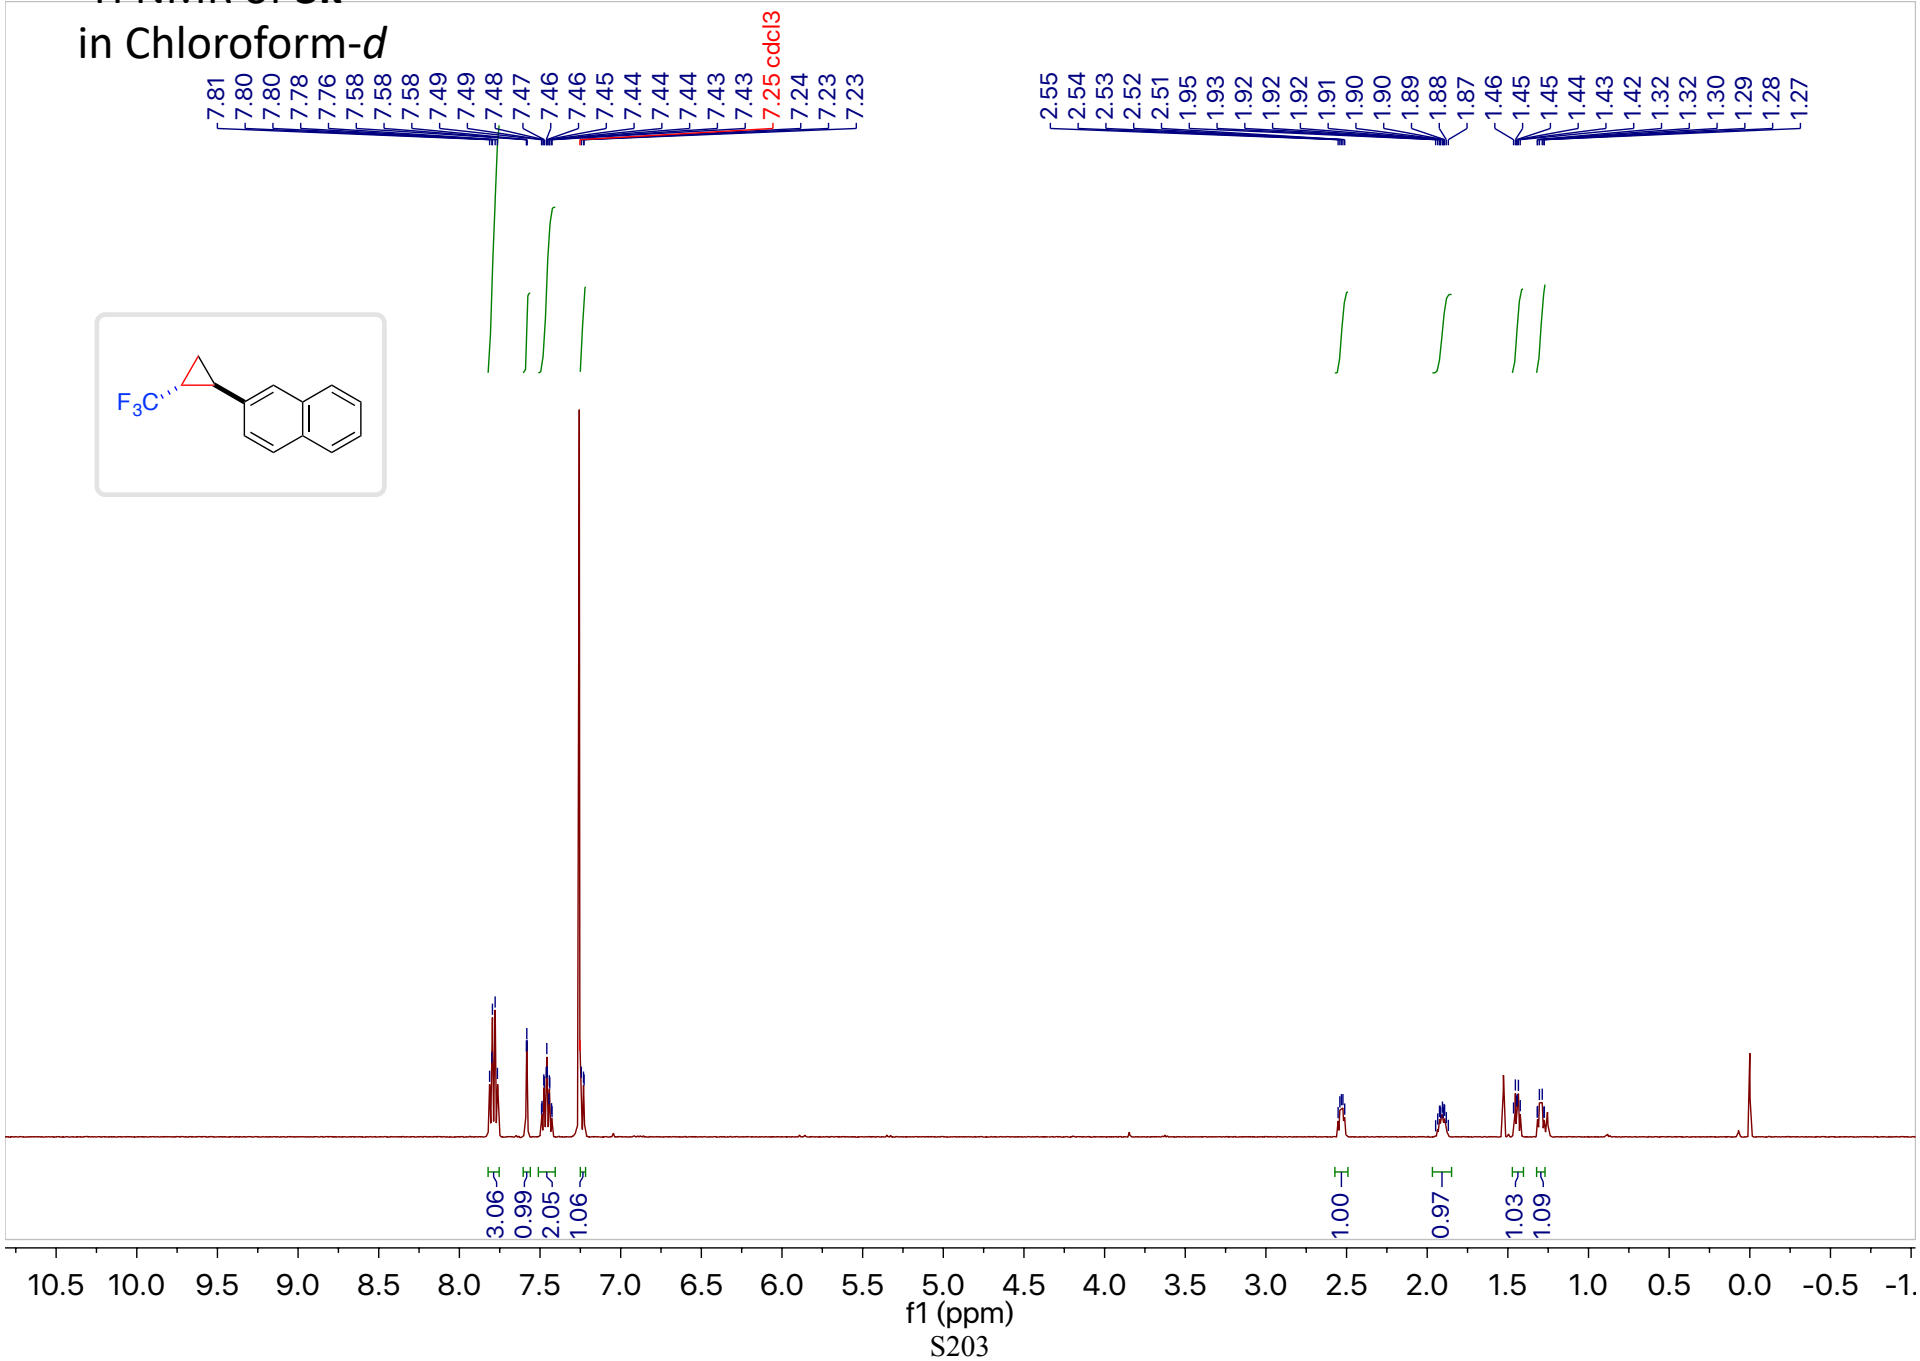



<sup>19</sup>F NMR of **3k**  
in Chloroform-*d*

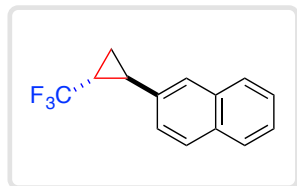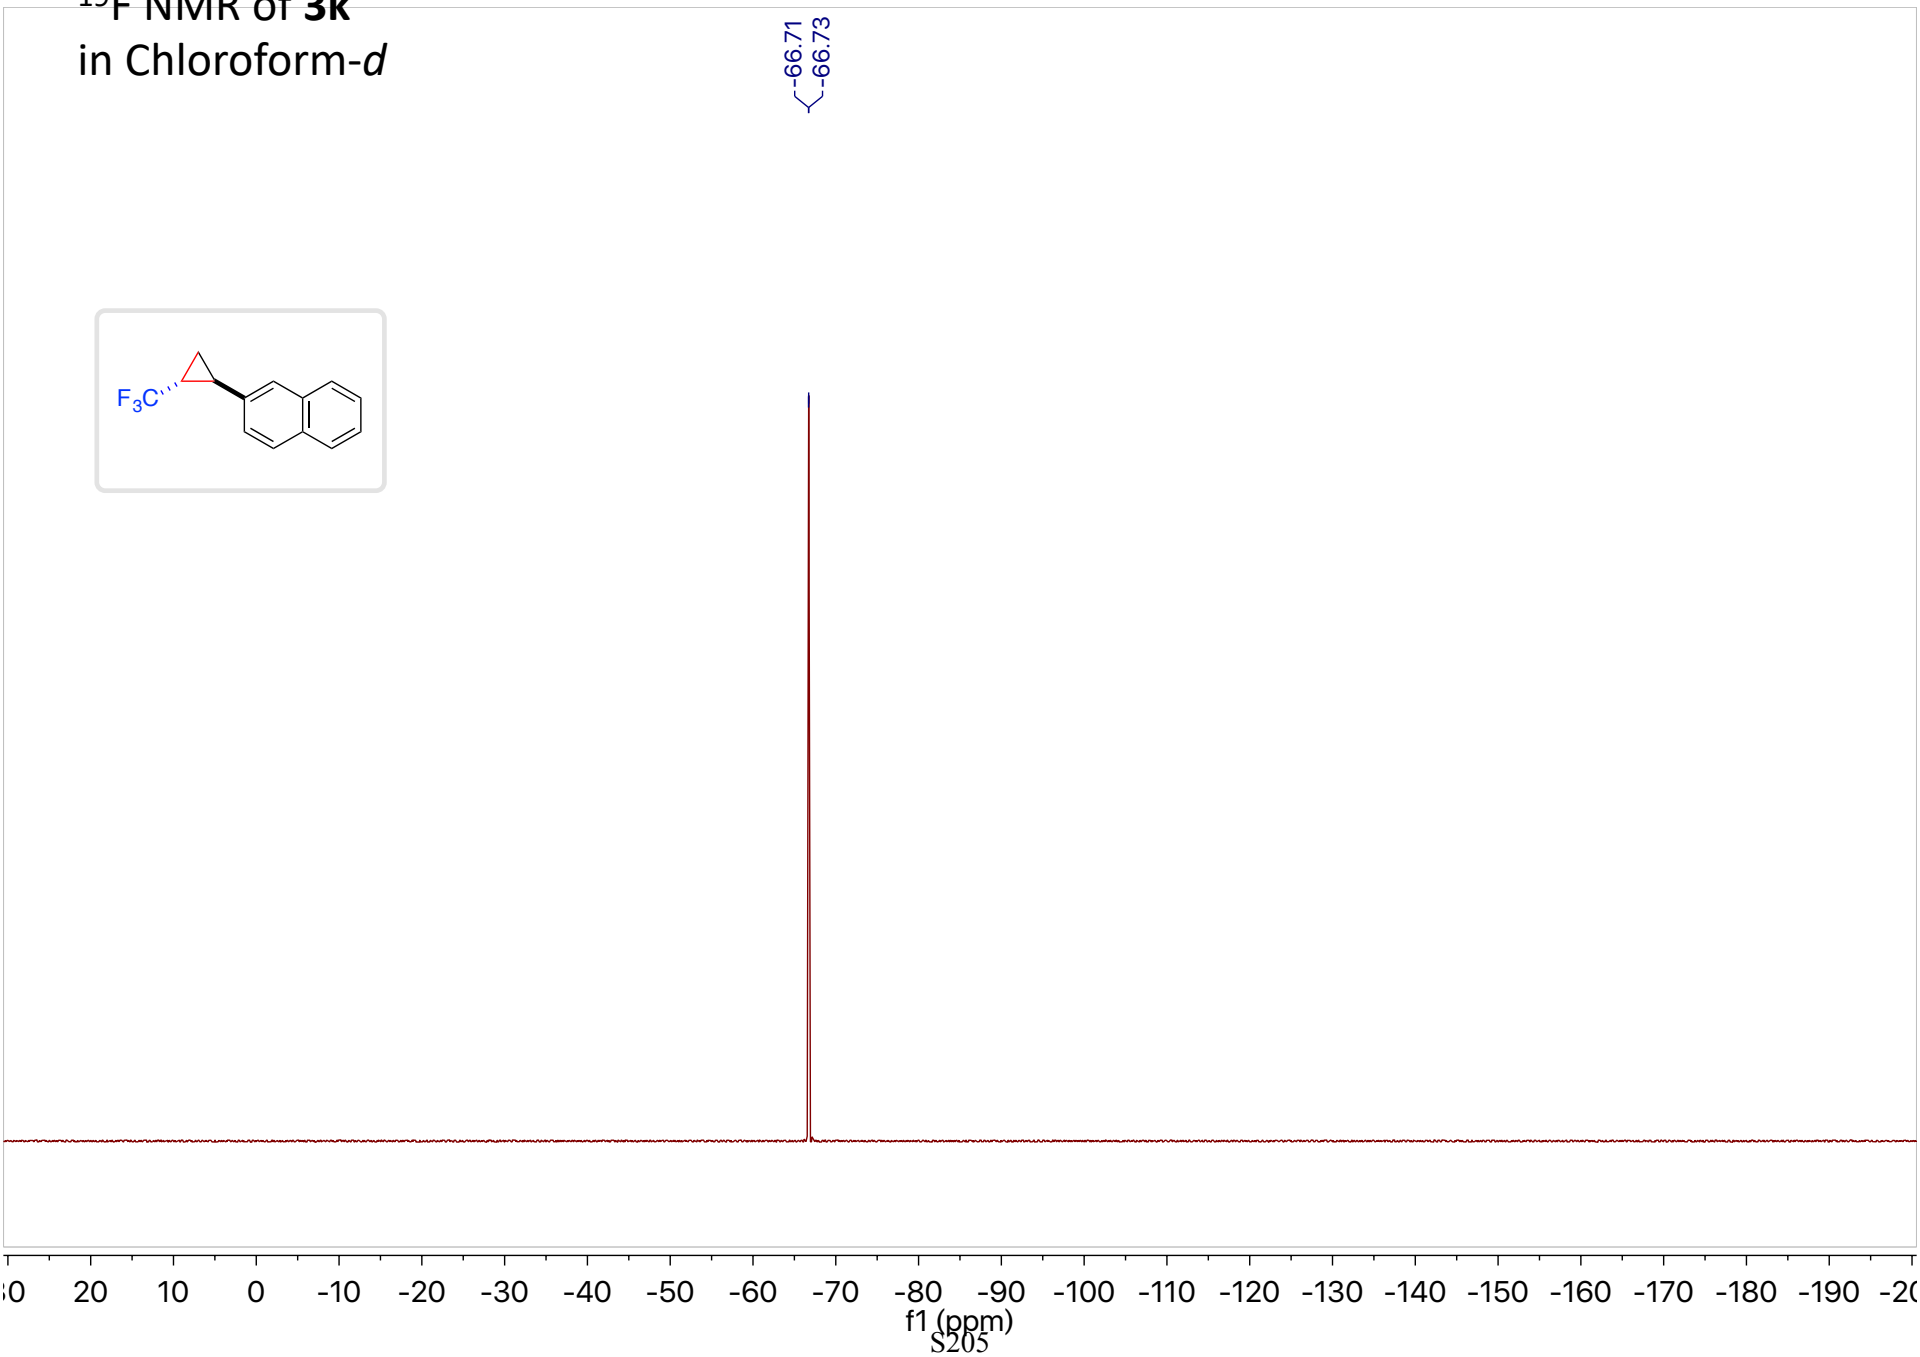

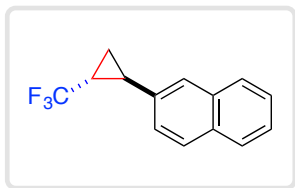

# HPLC of 3k

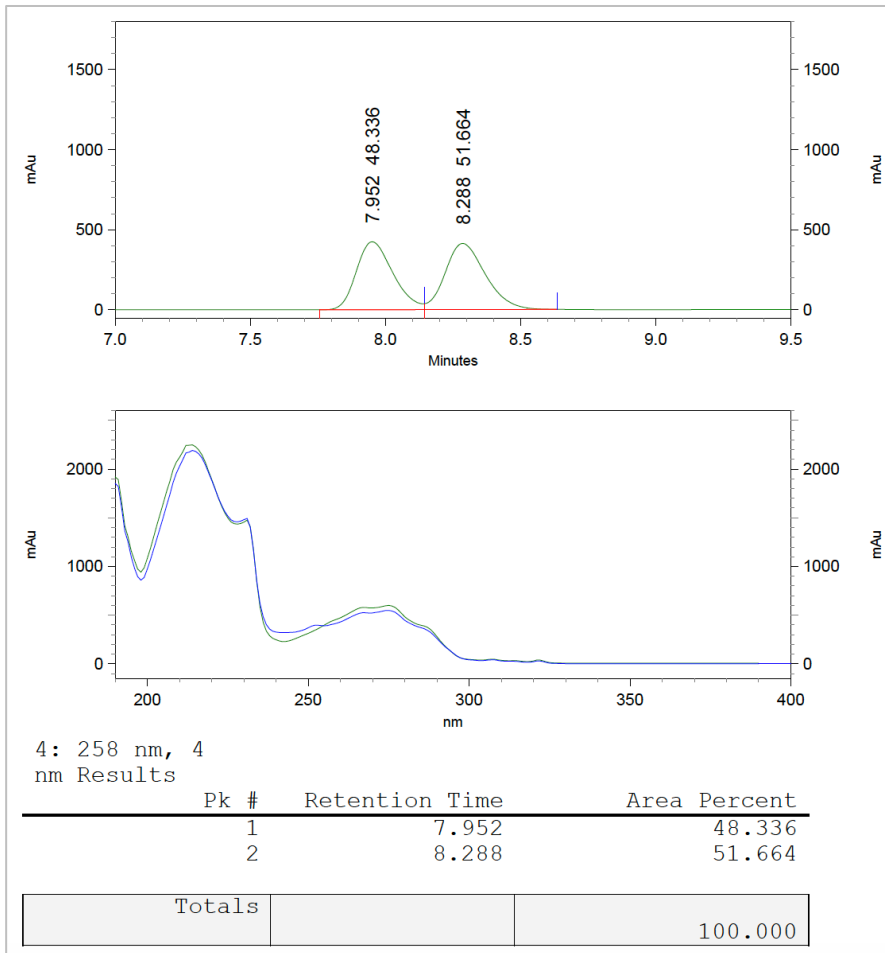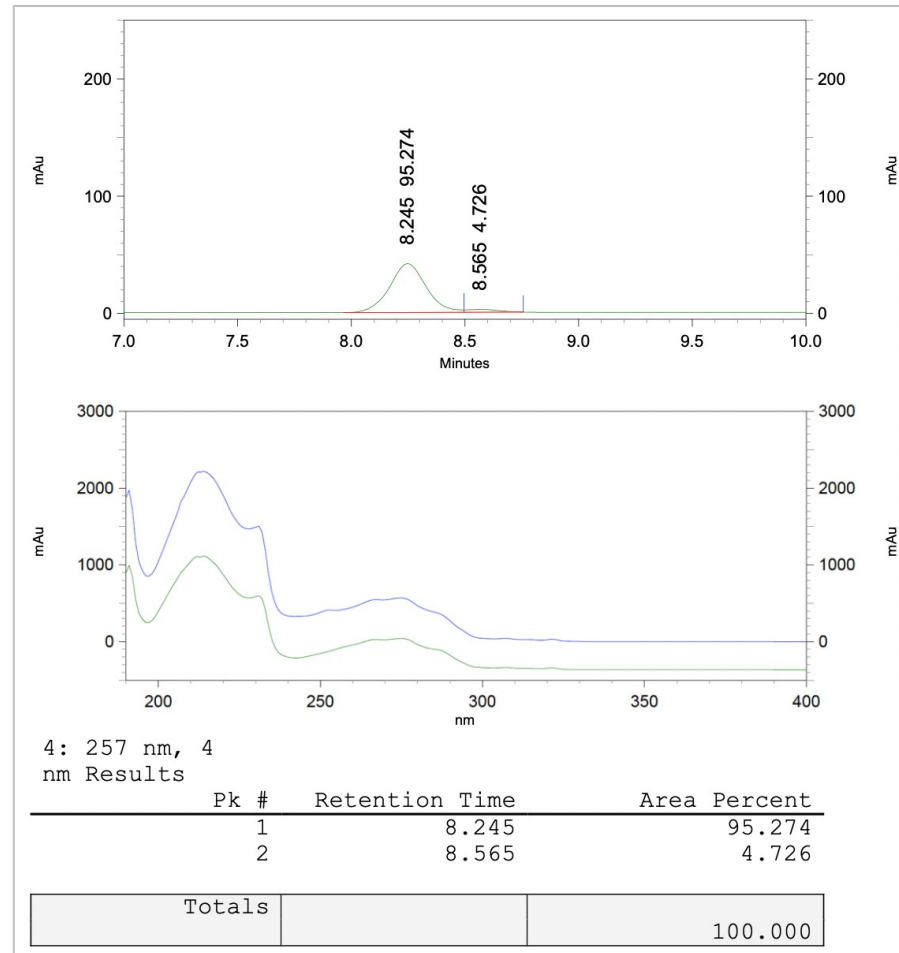

<sup>1</sup>H NMR of **3I**  
in Chloroform-*d*

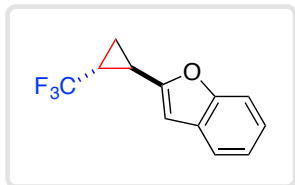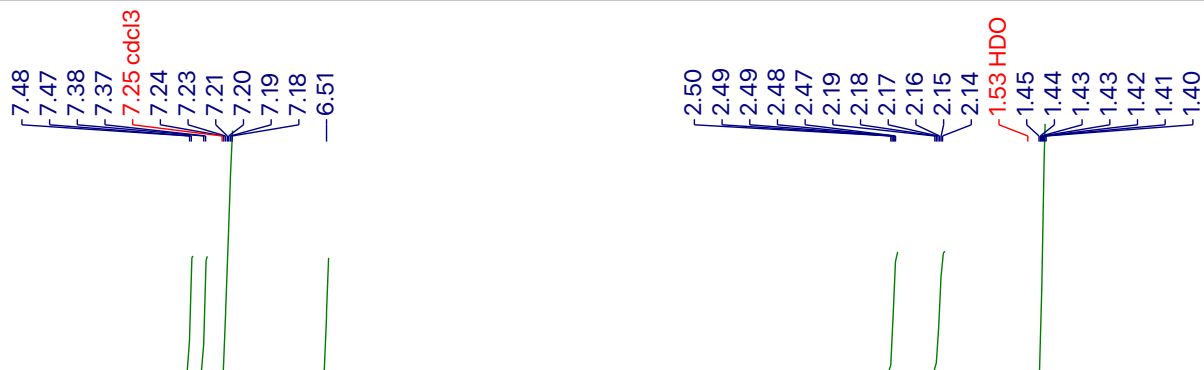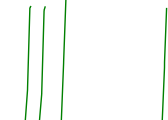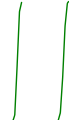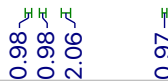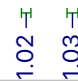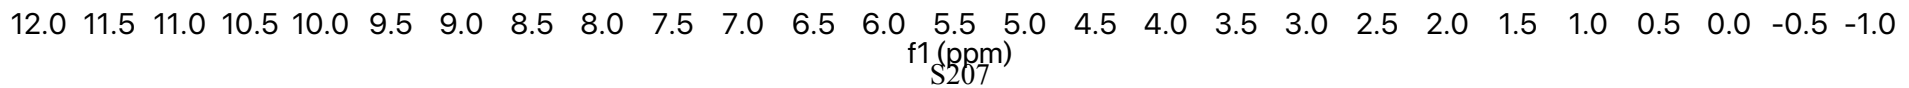



<sup>13</sup>C NMR of **3I**  
in Chloroform-*d*

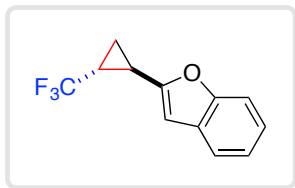

155.17  
154.46

128.70  
128.33  
126.53  
124.73  
123.93  
123.02  
122.93  
120.52  
110.96

102.85  
102.84

77.37 cdcl3  
77.16 cdcl3  
76.95 cdcl3

22.11  
21.86  
21.62  
21.37  
13.84  
13.82  
13.80  
13.78  
9.90  
9.88  
9.87  
9.85

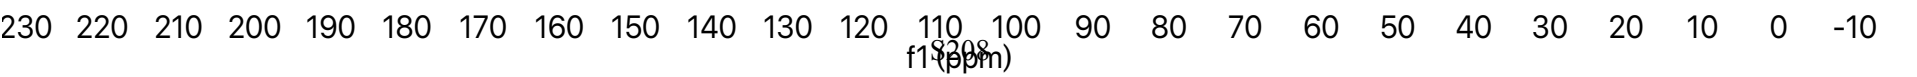

<sup>19</sup>F NMR of **3I**  
in Chloroform-*d*

-67.21  
-67.22

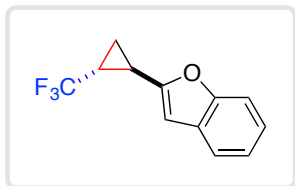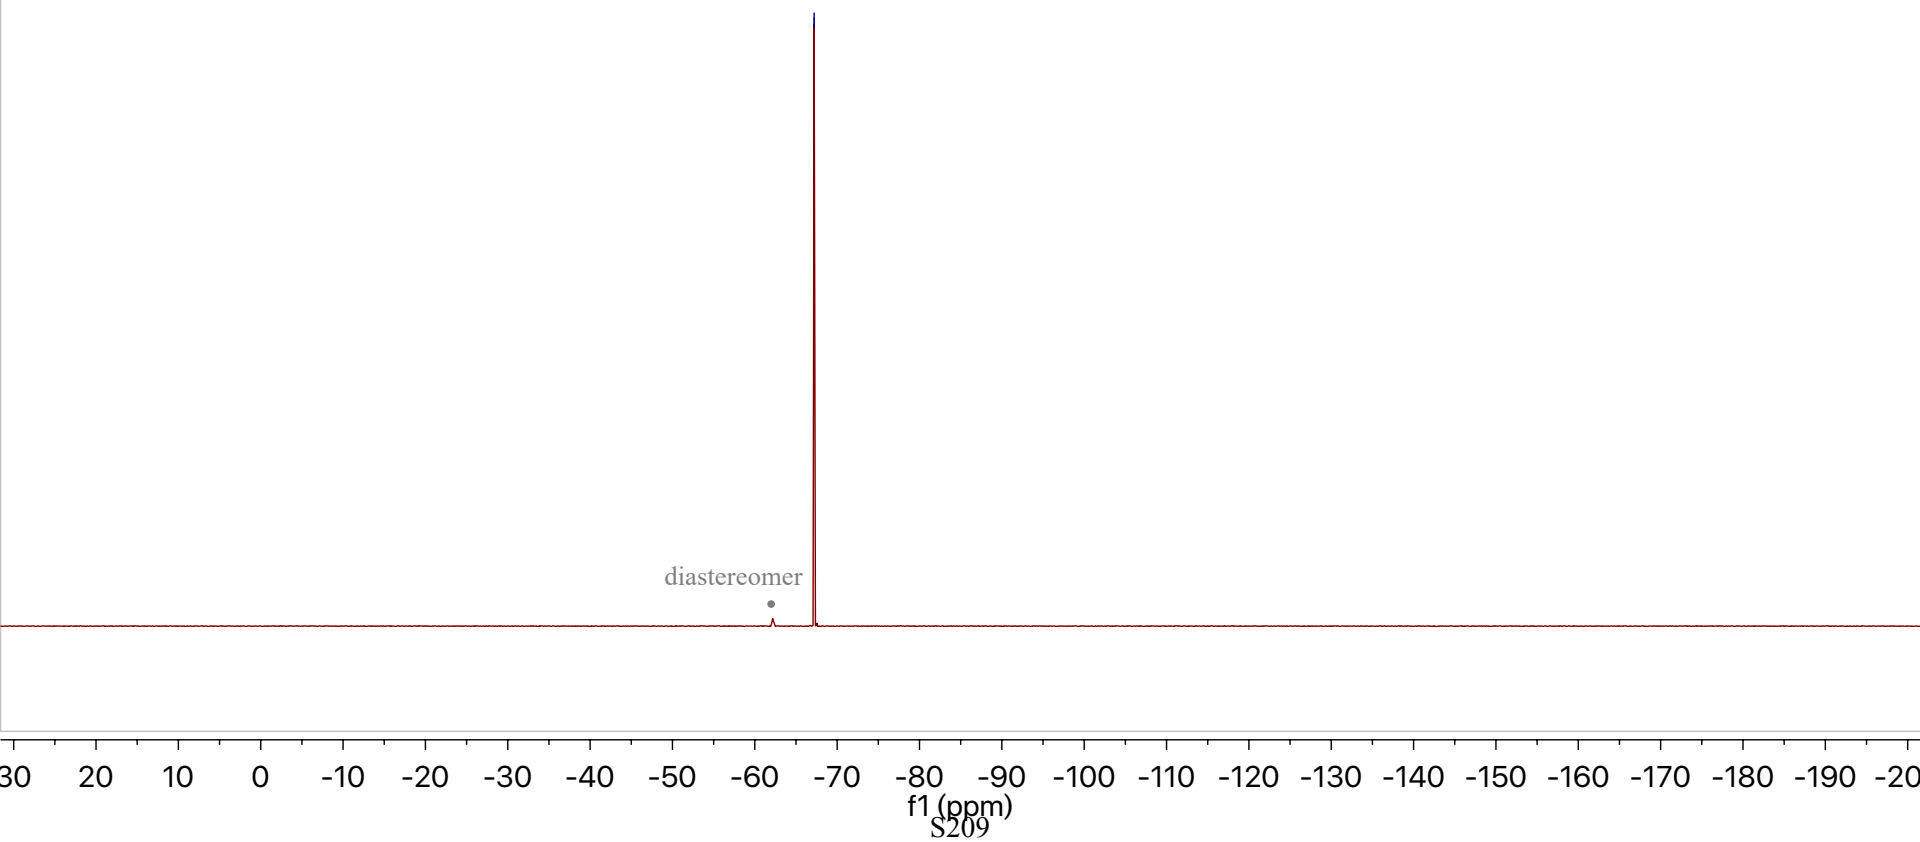

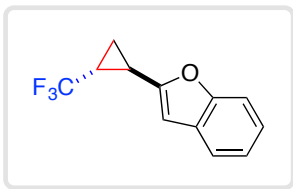

# HPLC of 3I

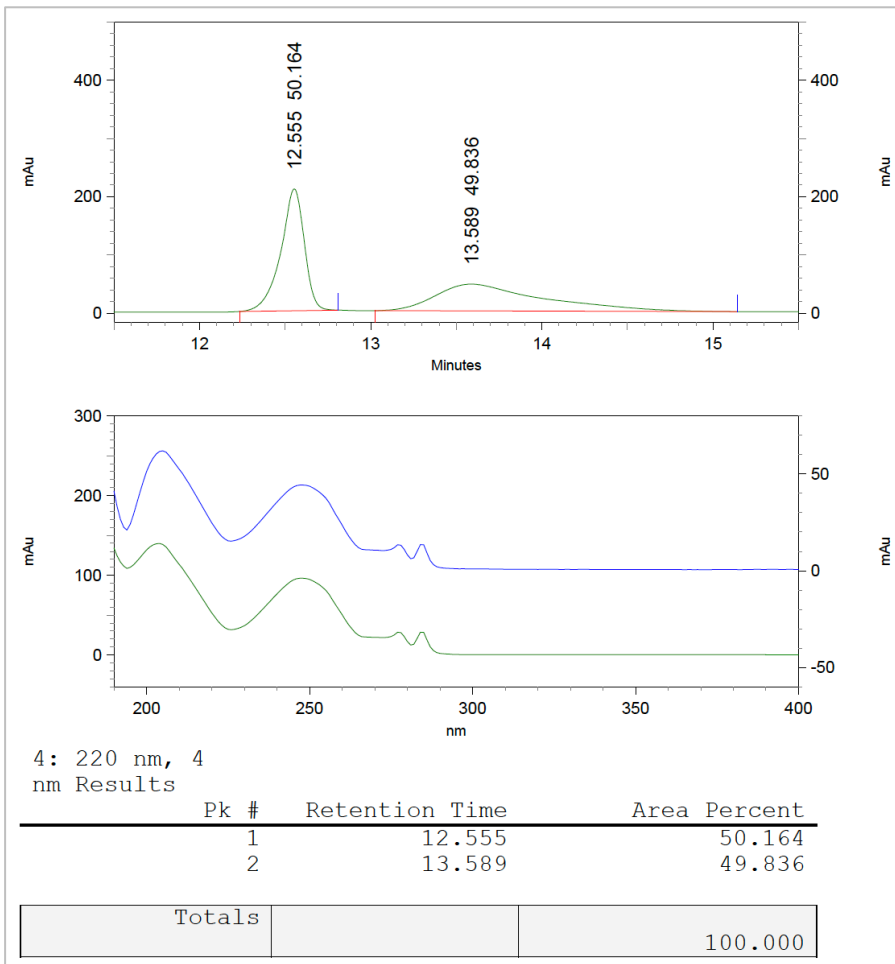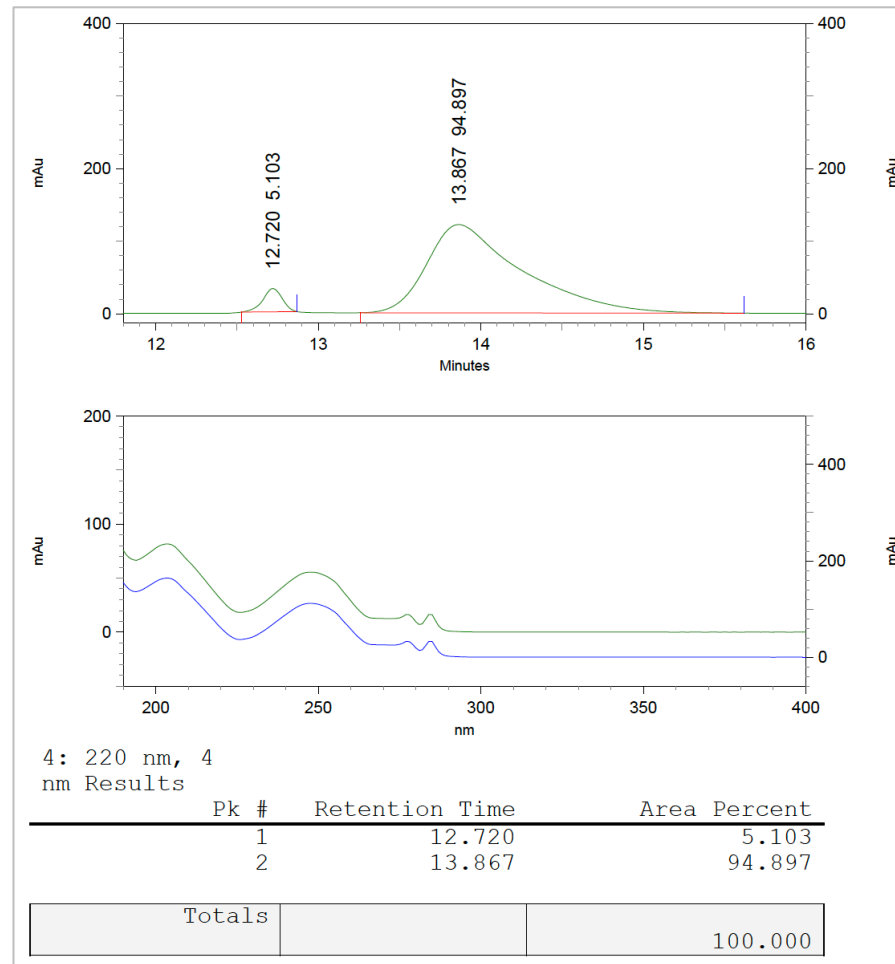

<sup>1</sup>H NMR of **3m**  
in Chloroform-*d*

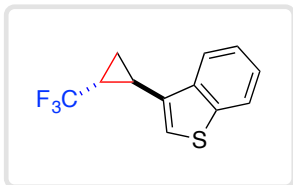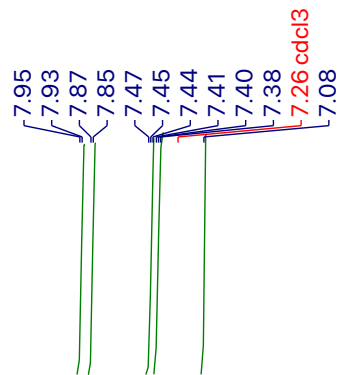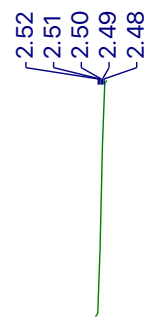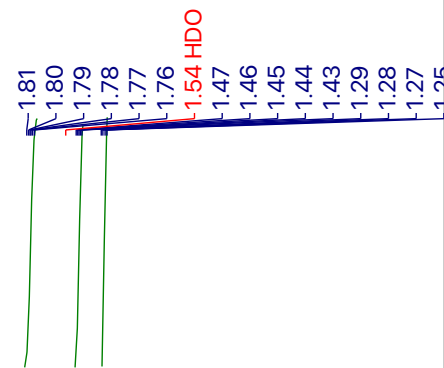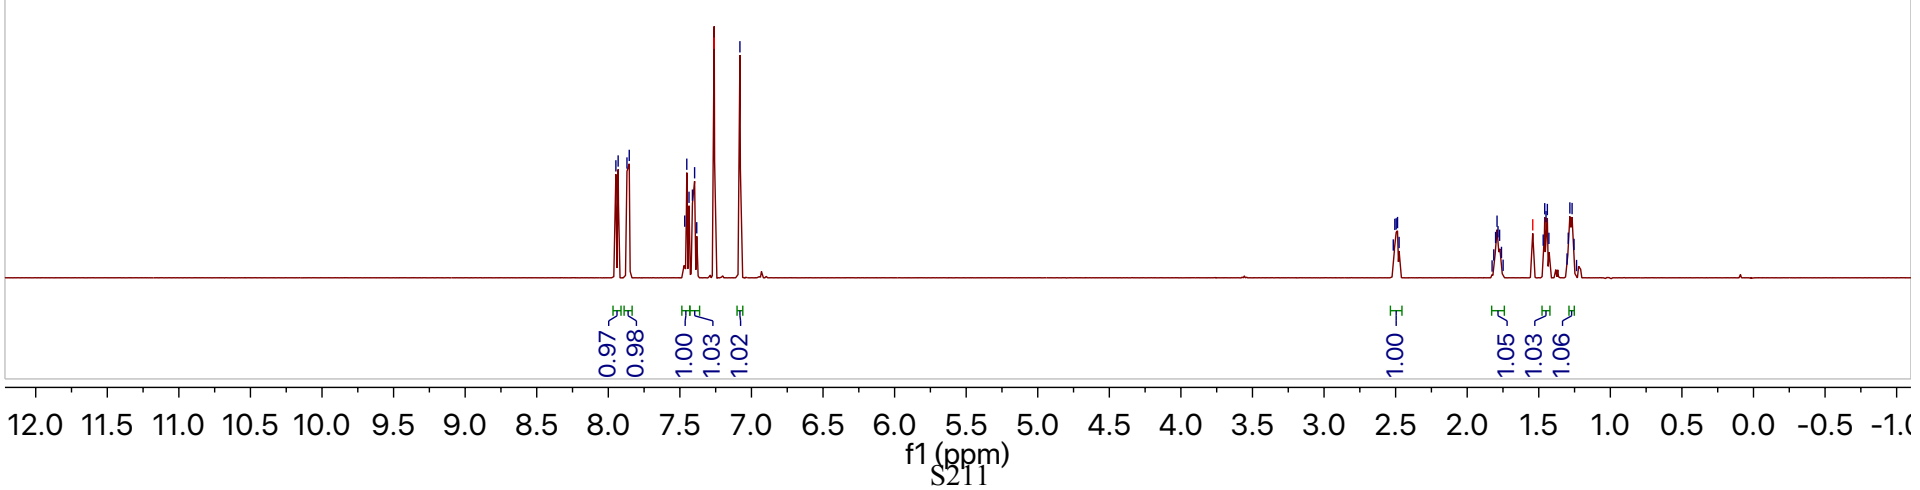

<sup>13</sup>C NMR of **3m**  
in Chloroform-*d*

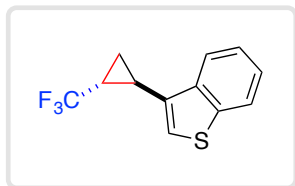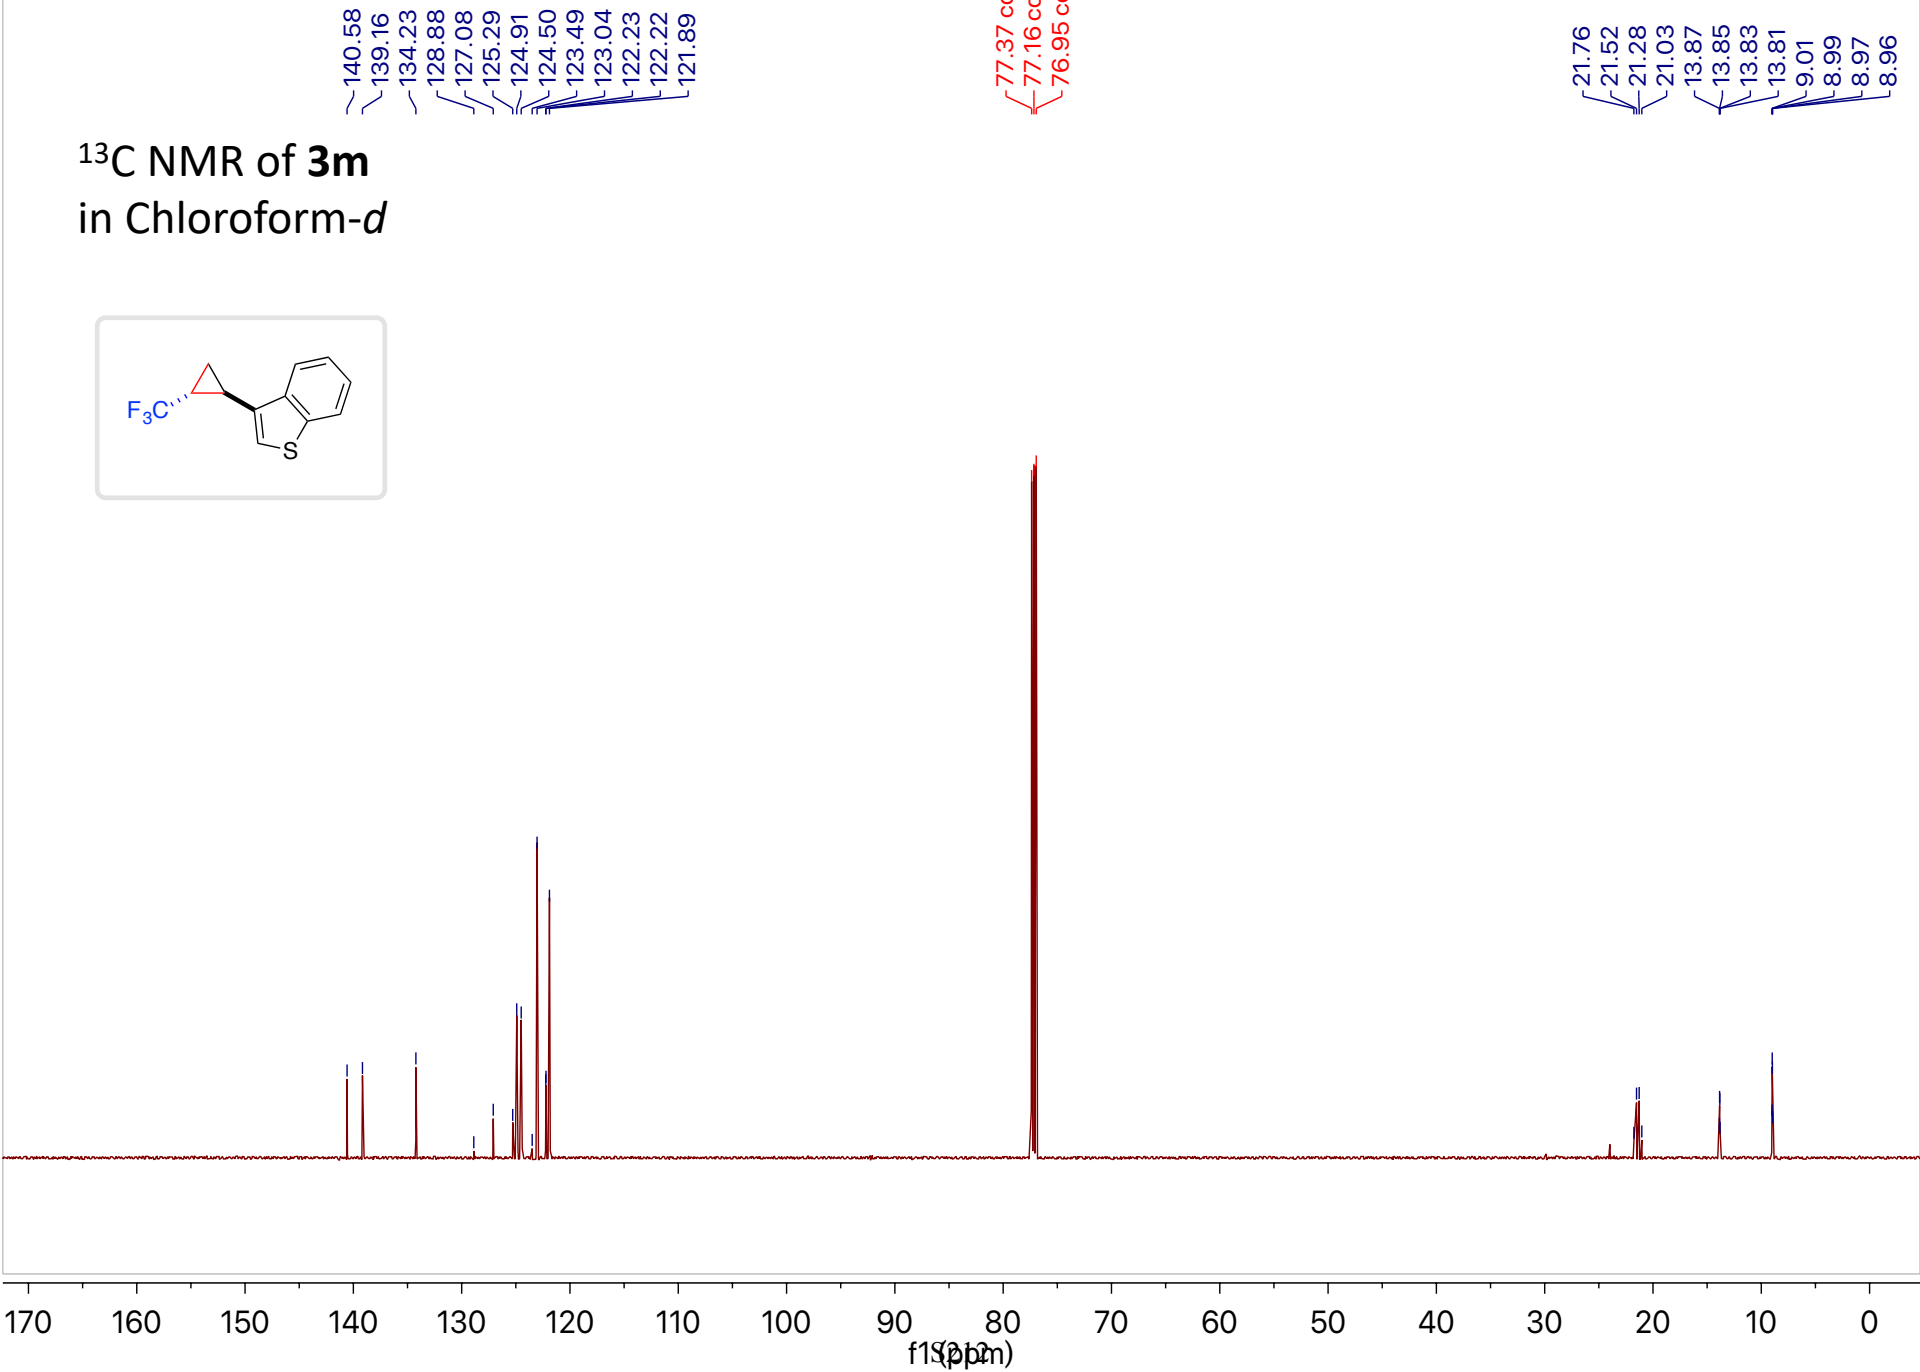

$^{19}\text{F}$  NMR of **3m**  
in Chloroform-*d*

-66.55  
-66.56

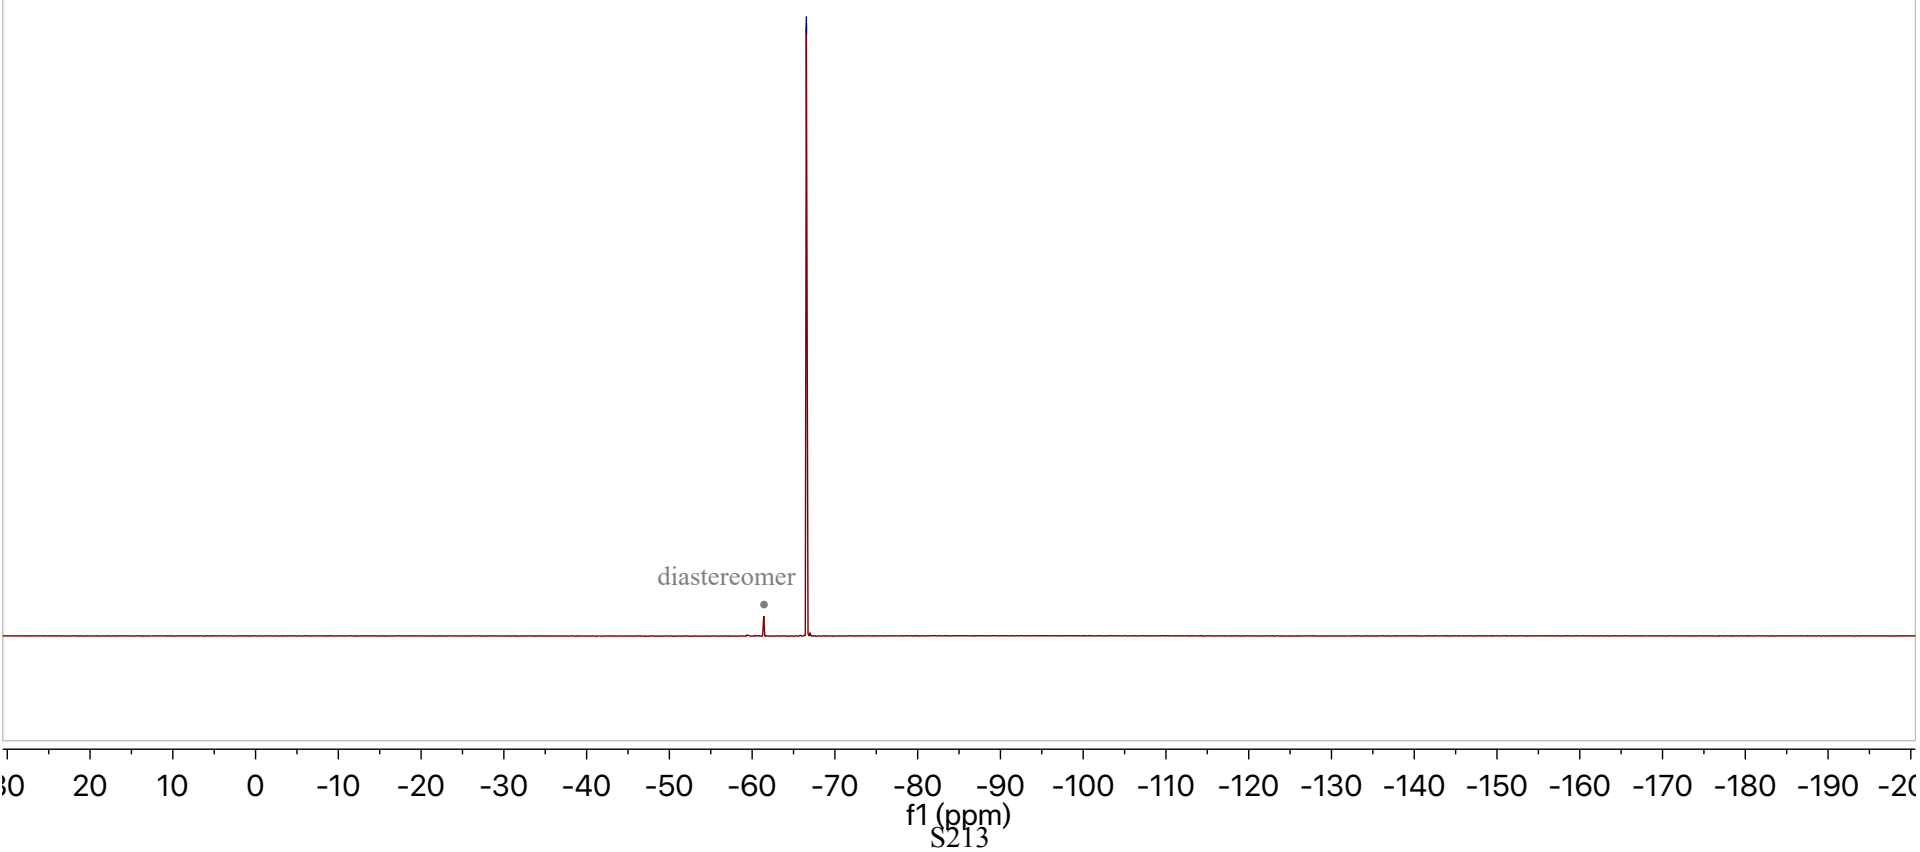

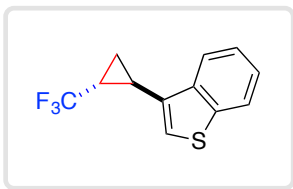

# HPLC of 3m

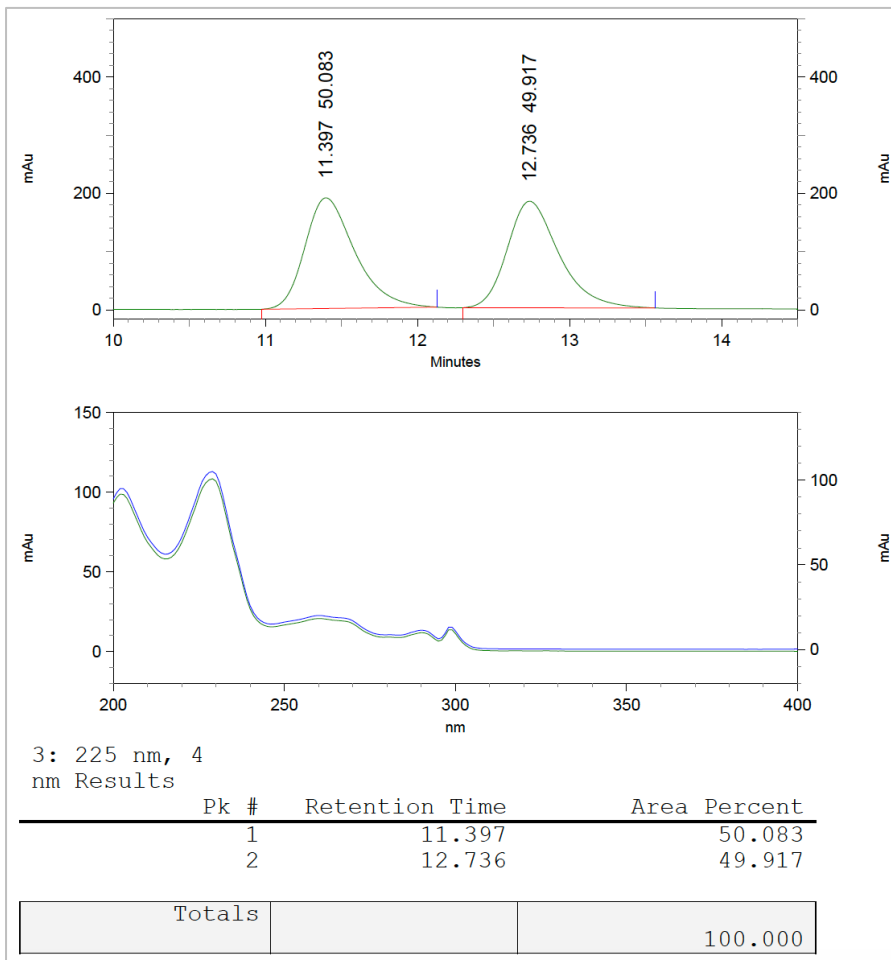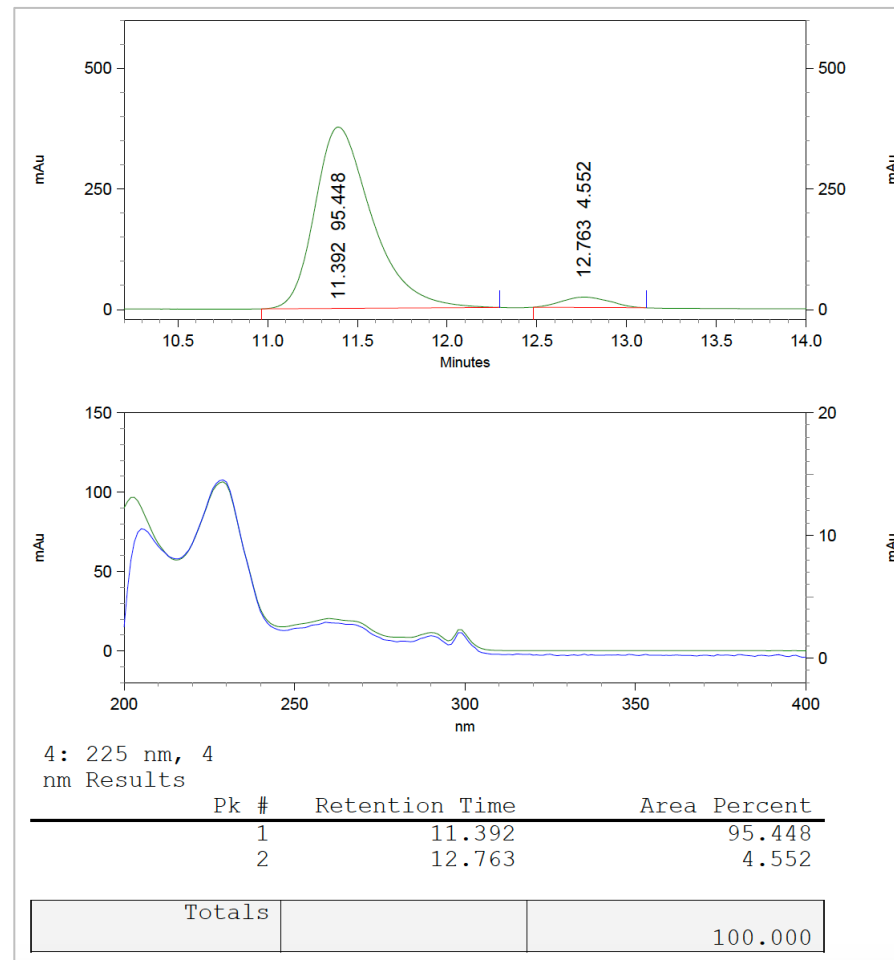

<sup>1</sup>H NMR of **3n**  
in Chloroform-*d*

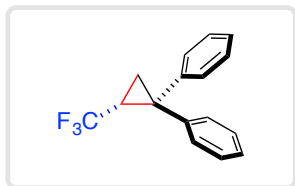

7.40  
7.40  
7.39  
7.28  
7.27  
7.27  
7.24  
7.24  
7.23  
7.23  
7.22  
7.21  
7.21  
7.19  
7.17  
7.15  
7.15  
7.15  
7.14  
7.12

2.34  
2.33  
2.31  
2.30  
2.29  
2.27  
1.86  
1.85  
1.84  
1.50  
1.49  
1.48  
1.47

13 12 11 10 9 8 7 6 5 4 3 2 1 0 -1 -2

f1 (ppm)

S215

2.01  
2.02  
6.06

1.00  
1.05  
1.10



$^{13}\text{C}$  NMR of **3n**  
in Chloroform-*d*

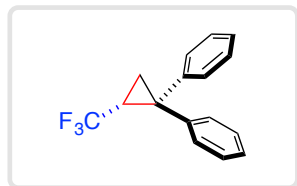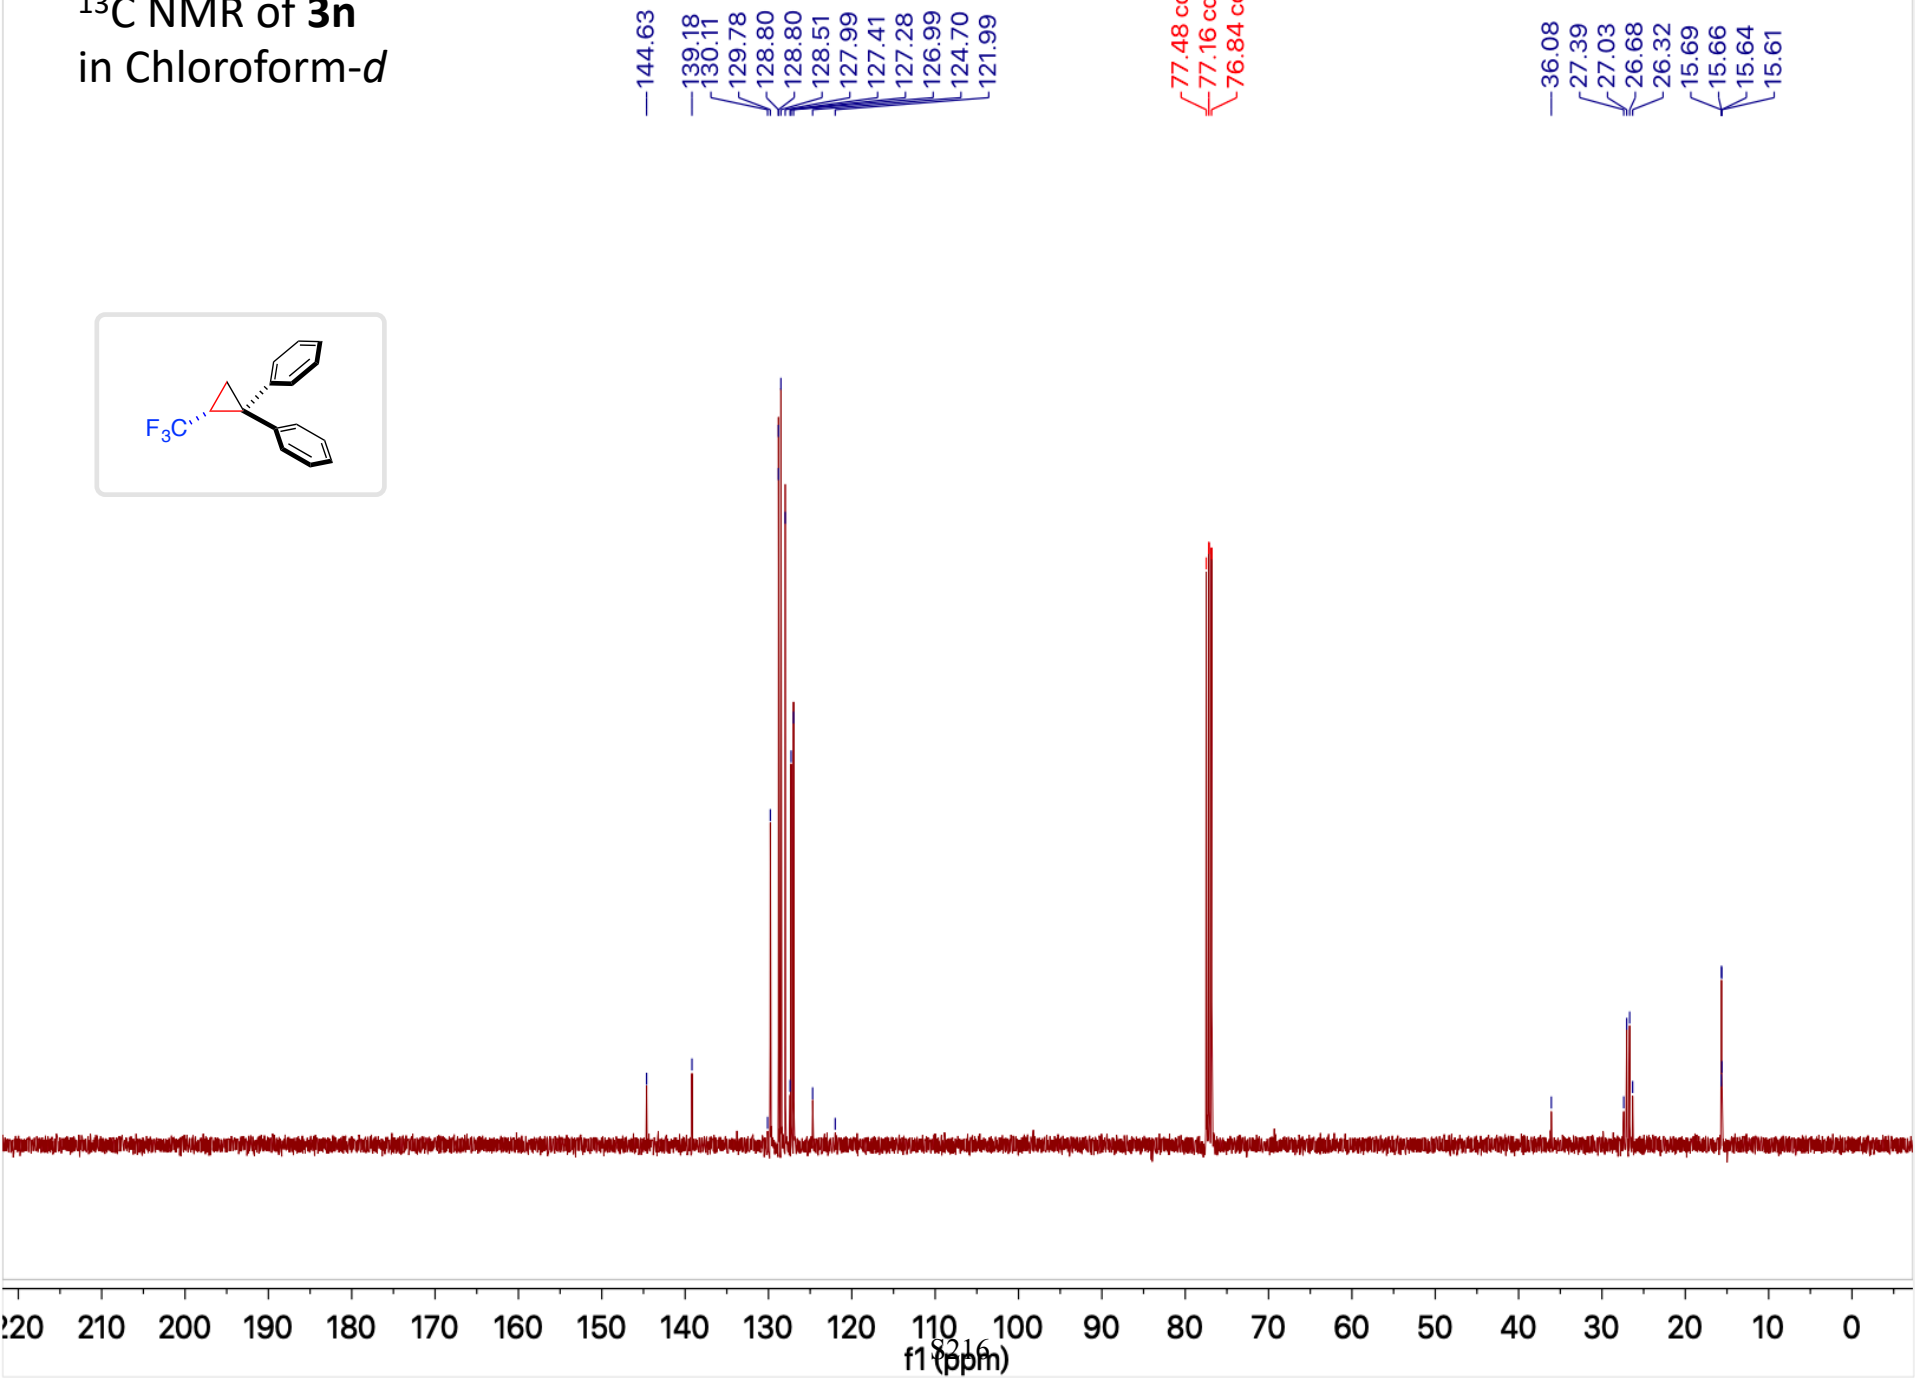

$^{19}\text{F}$  NMR of **3n**  
in Chloroform-*d*



-61.45  
-61.46

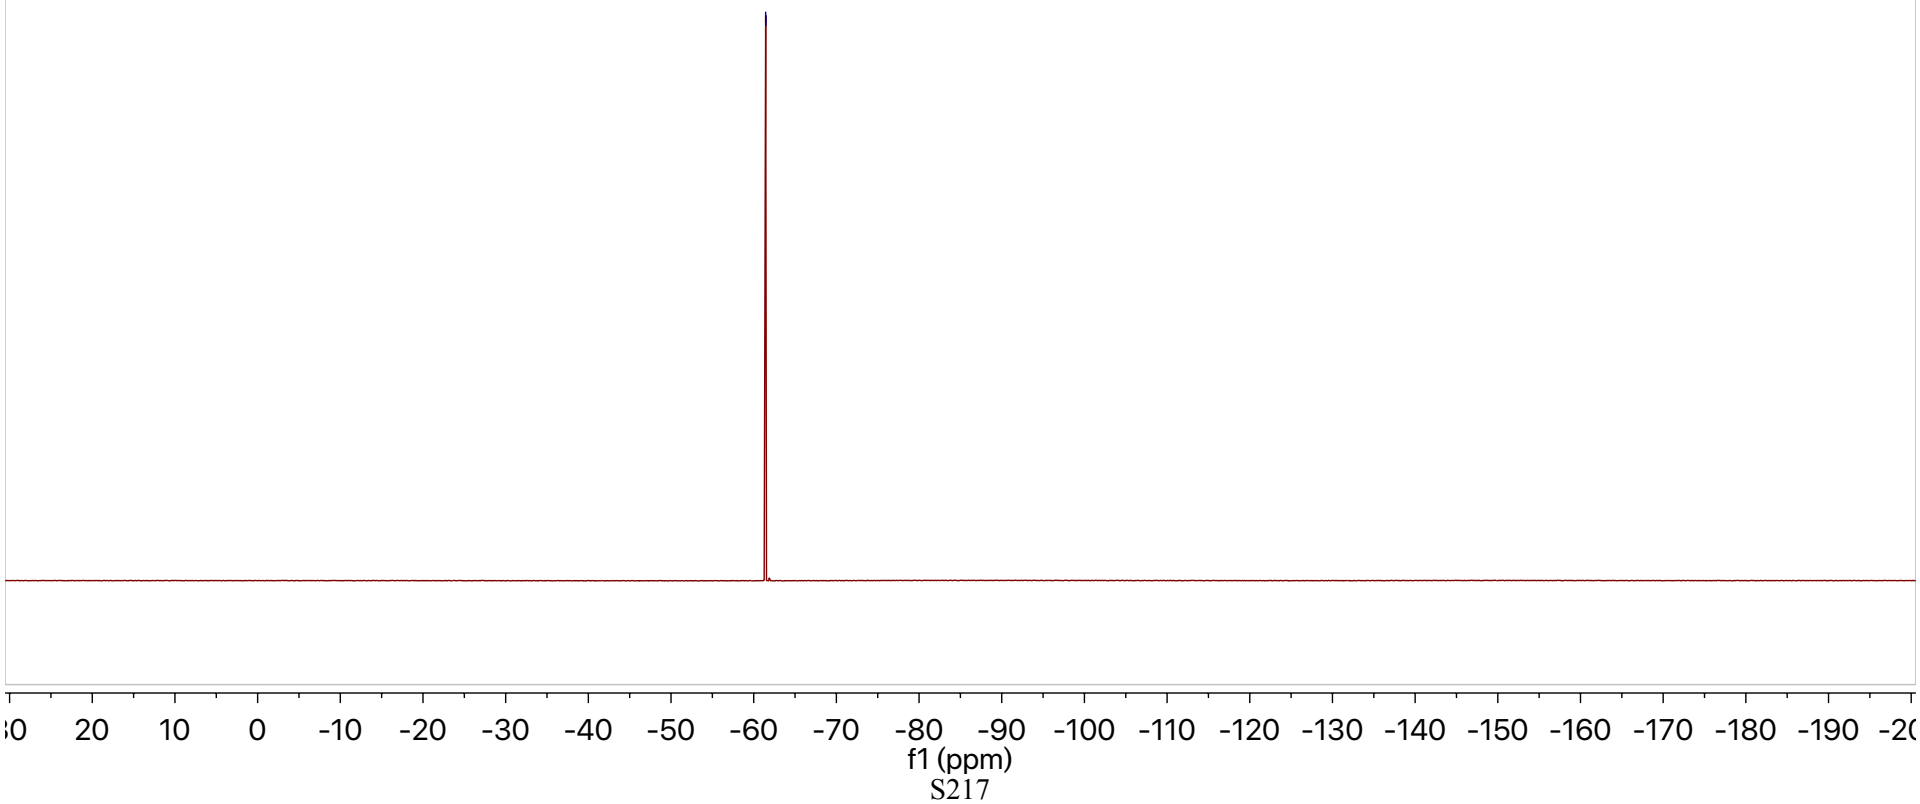

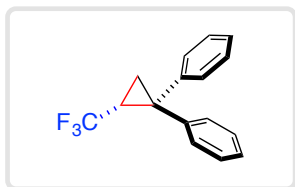

# HPLC of 3n

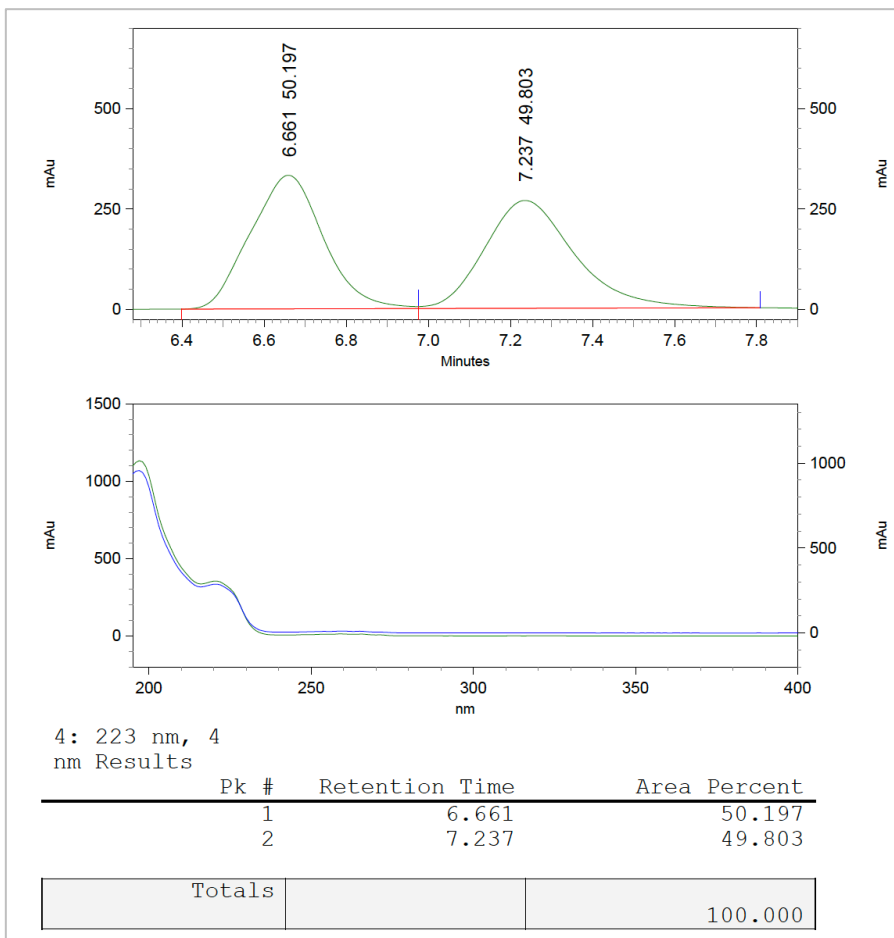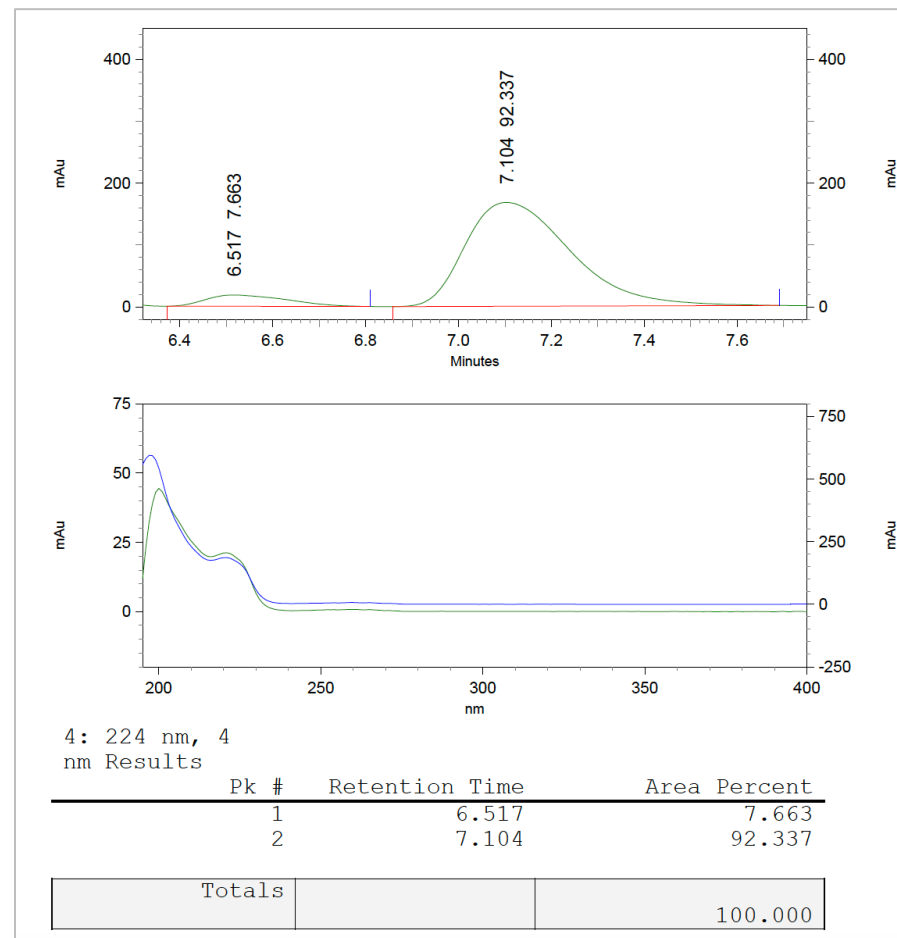

<sup>1</sup>H NMR of **3o**  
in Chloroform-*d*

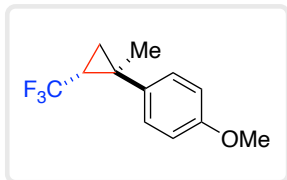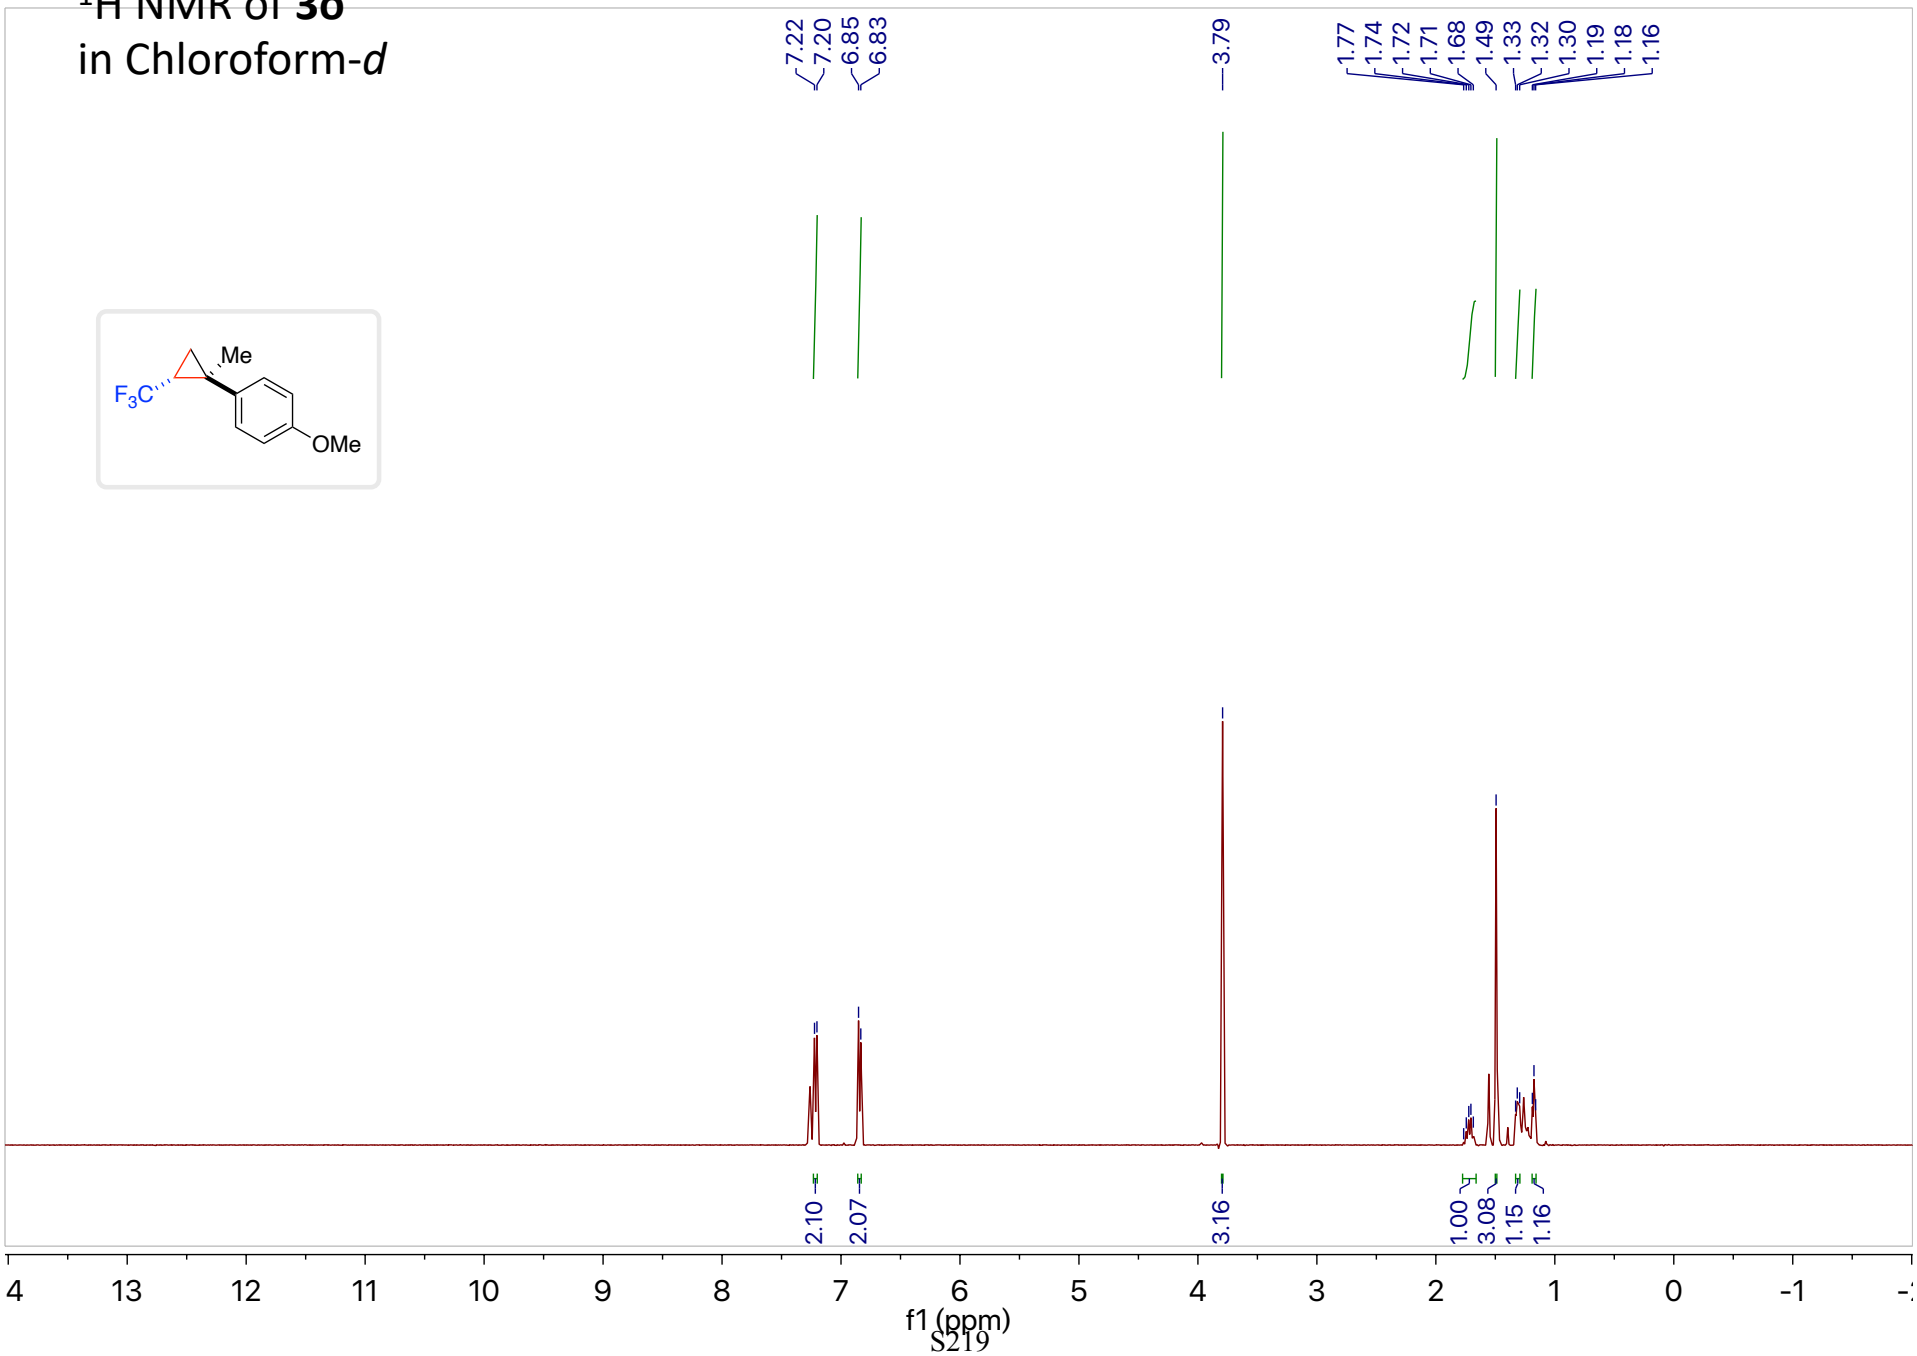

$^{13}\text{C}$  NMR of **3o**  
in Chloroform-*d*



—158.45

—137.94

130.02

128.76

128.25

125.54

124.07

—114.07

77.48 cdcl3

77.16 cdcl3

76.84 cdcl3

—55.46

26.82

26.45

26.10

25.74

25.71

21.21

21.19

21.17

21.16

16.85

16.83

16.81

16.78

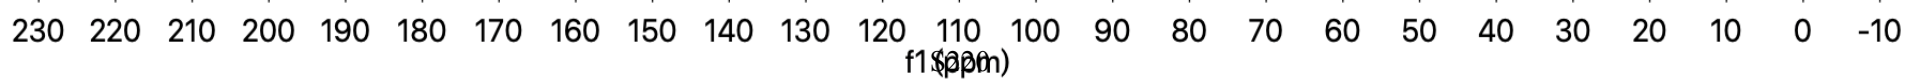

$^{19}\text{F}$  NMR of **3o**  
in Chloroform-*d*

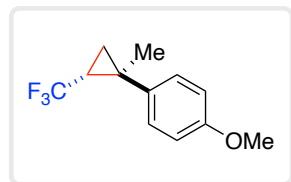

59.81  
59.82

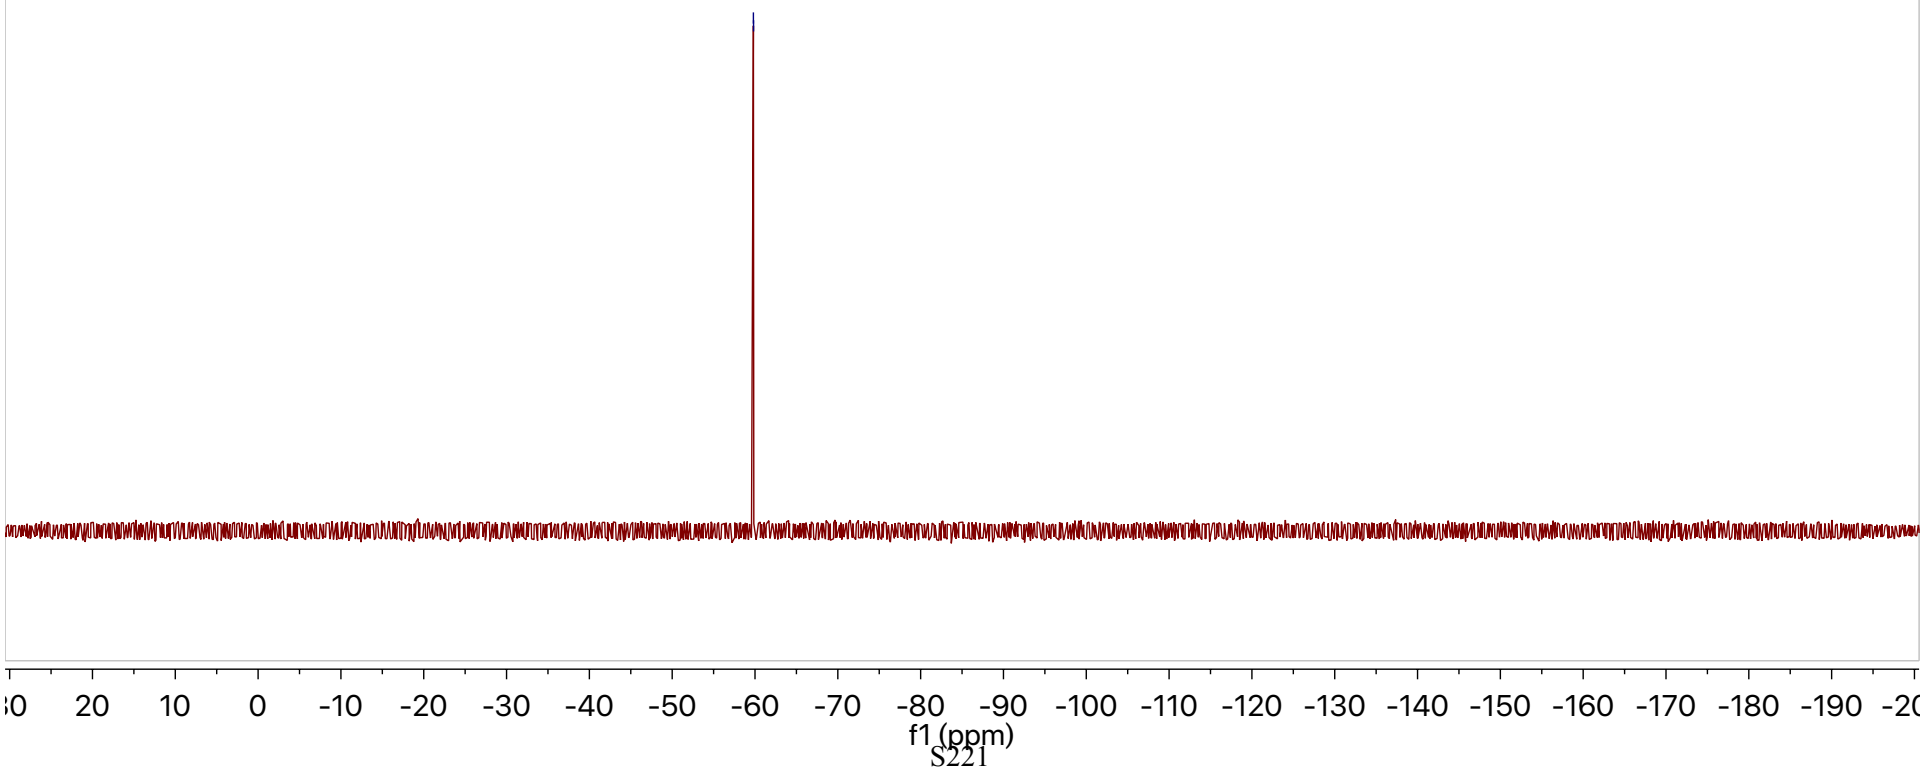

# HPLC of 3o

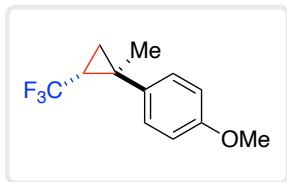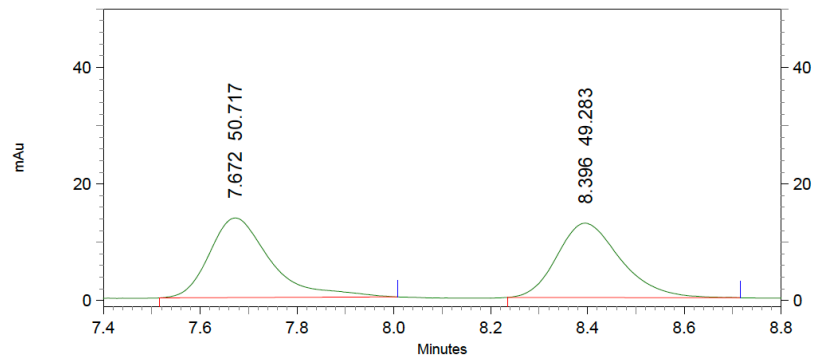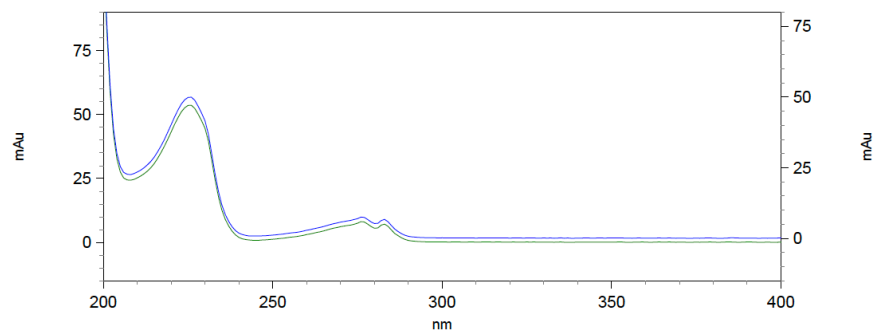

3: 237 nm, 4 nm Results

| Pk # | Retention Time | Area Percent |
|------|----------------|--------------|
| 1    | 7.672          | 50.717       |
| 2    | 8.396          | 49.283       |

| Totals |  | 100.000 |
|--------|--|---------|
|--------|--|---------|

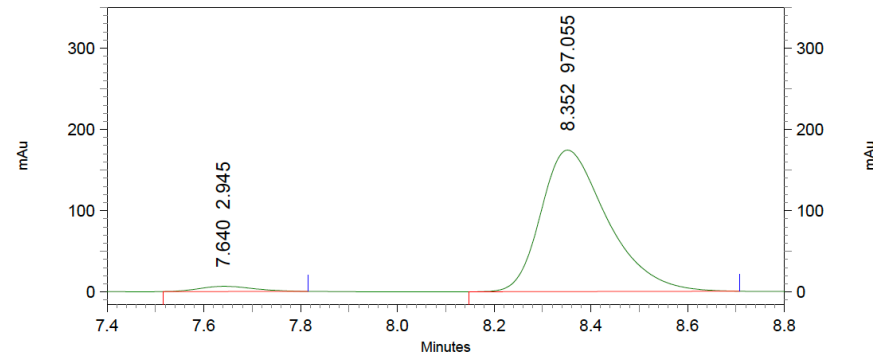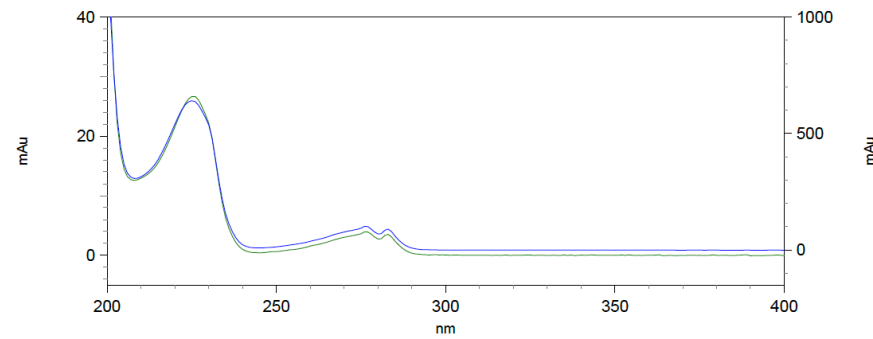

3: 237 nm, 4 nm Results

| Pk # | Retention Time | Area Percent |
|------|----------------|--------------|
| 1    | 7.640          | 2.945        |
| 2    | 8.352          | 97.055       |

| Totals |  | 100.000 |
|--------|--|---------|
|--------|--|---------|

<sup>1</sup>H NMR of **3p**  
in Chloroform-*d*

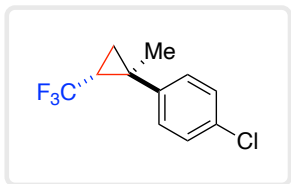

7.28  
7.27  
7.27  
7.26  
7.25  
7.25  
7.22  
7.22  
7.20  
7.20

1.75  
1.73  
1.72  
1.70  
1.69  
1.67  
1.49  
1.33  
1.32  
1.31  
1.30  
1.22  
1.20

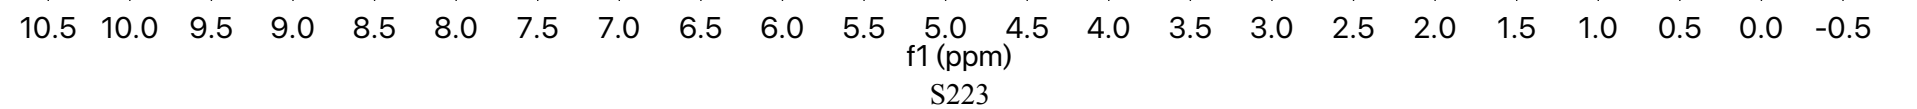



$^{13}\text{C}$  NMR of **3p**  
in Chloroform-*d*

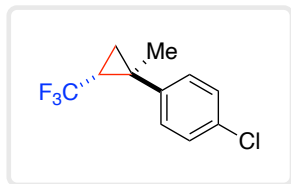

144.11  
132.70  
130.70  
129.12  
128.90  
128.00  
125.29  
122.58

77.48 cdcl3  
77.16 cdcl3  
76.84 cdcl3

26.83  
26.47  
26.11  
25.84  
25.76  
20.87  
20.85  
20.83  
20.81  
16.80  
16.77  
16.75  
16.73

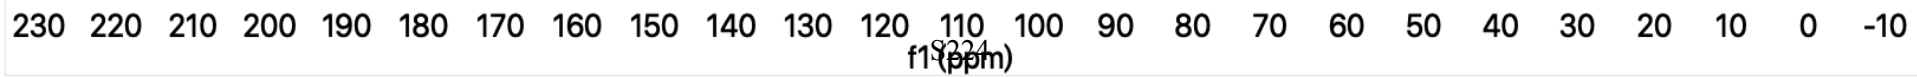

$^{19}\text{F}$  NMR of **3p**  
in Chloroform-*d*

59.93  
59.95



160 150 140 130 120 110 100 90 80 70 60 50 40 30 20 10 0 -10 -20 -30 -40 -50 -60 -70 -80 -90 -100 -110 -120 -130 -140 -150 -160

f1 (ppm)  
S225

# HPLC of 3p

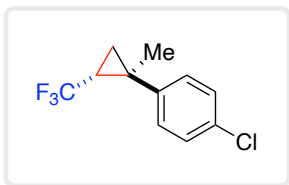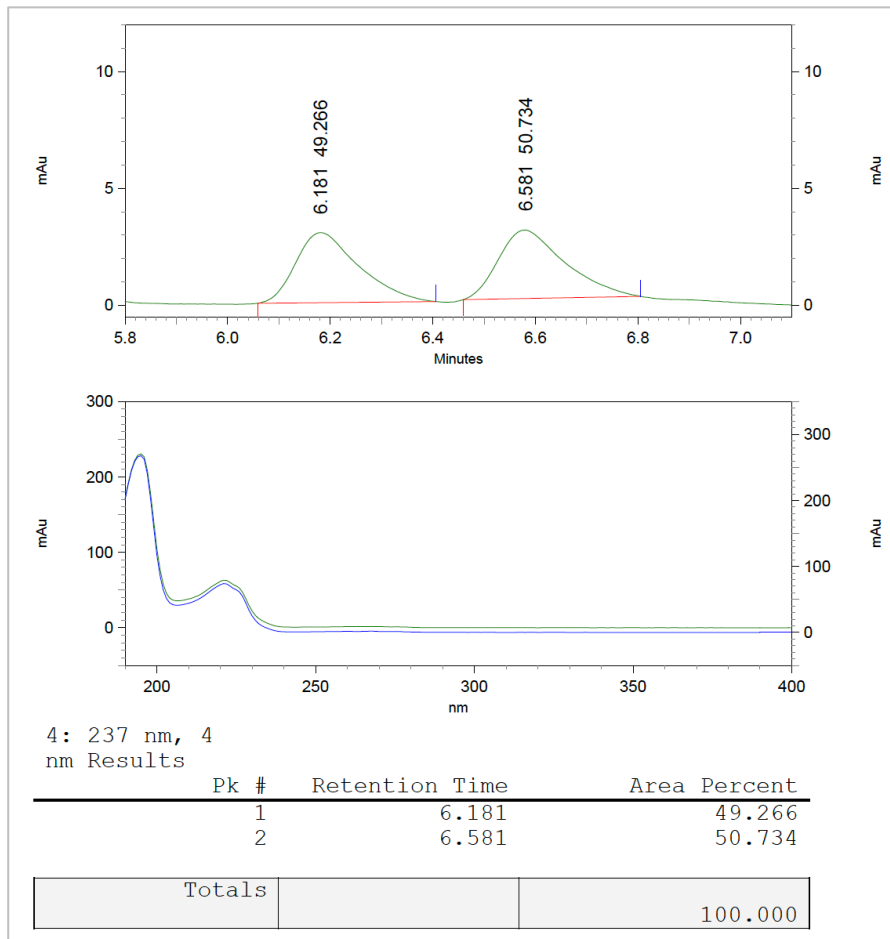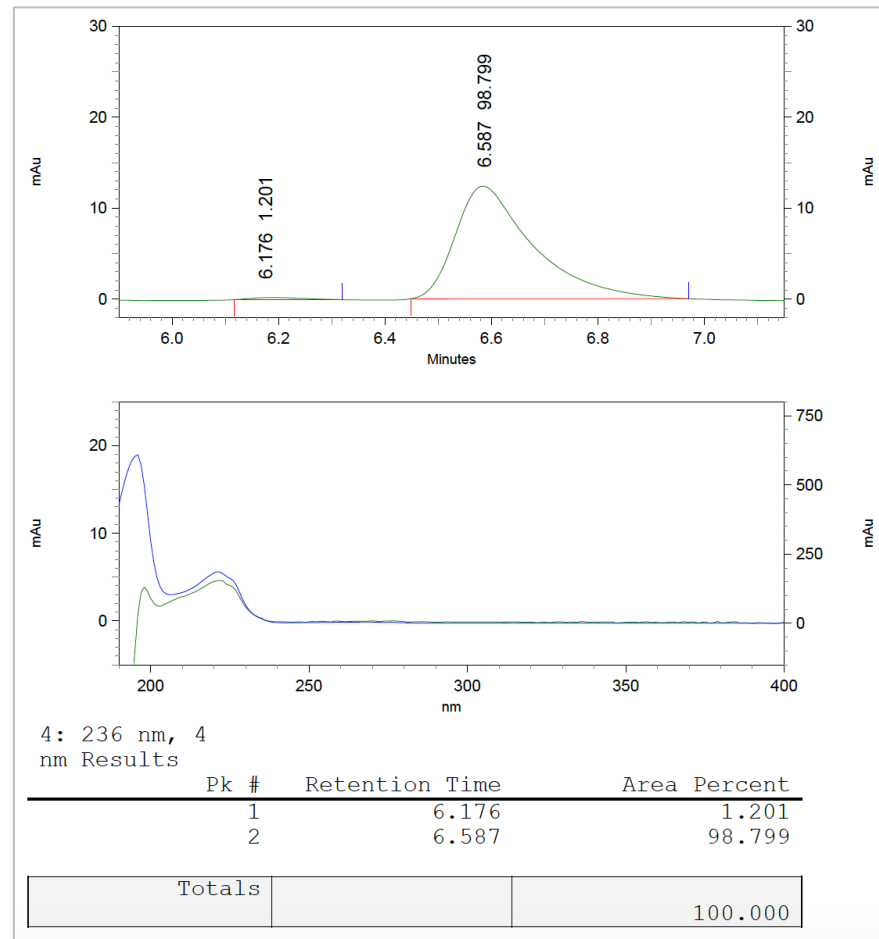

<sup>1</sup>H NMR of **3q**  
in Chloroform-*d*

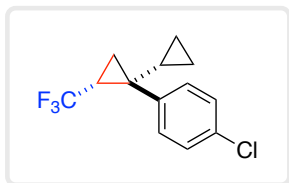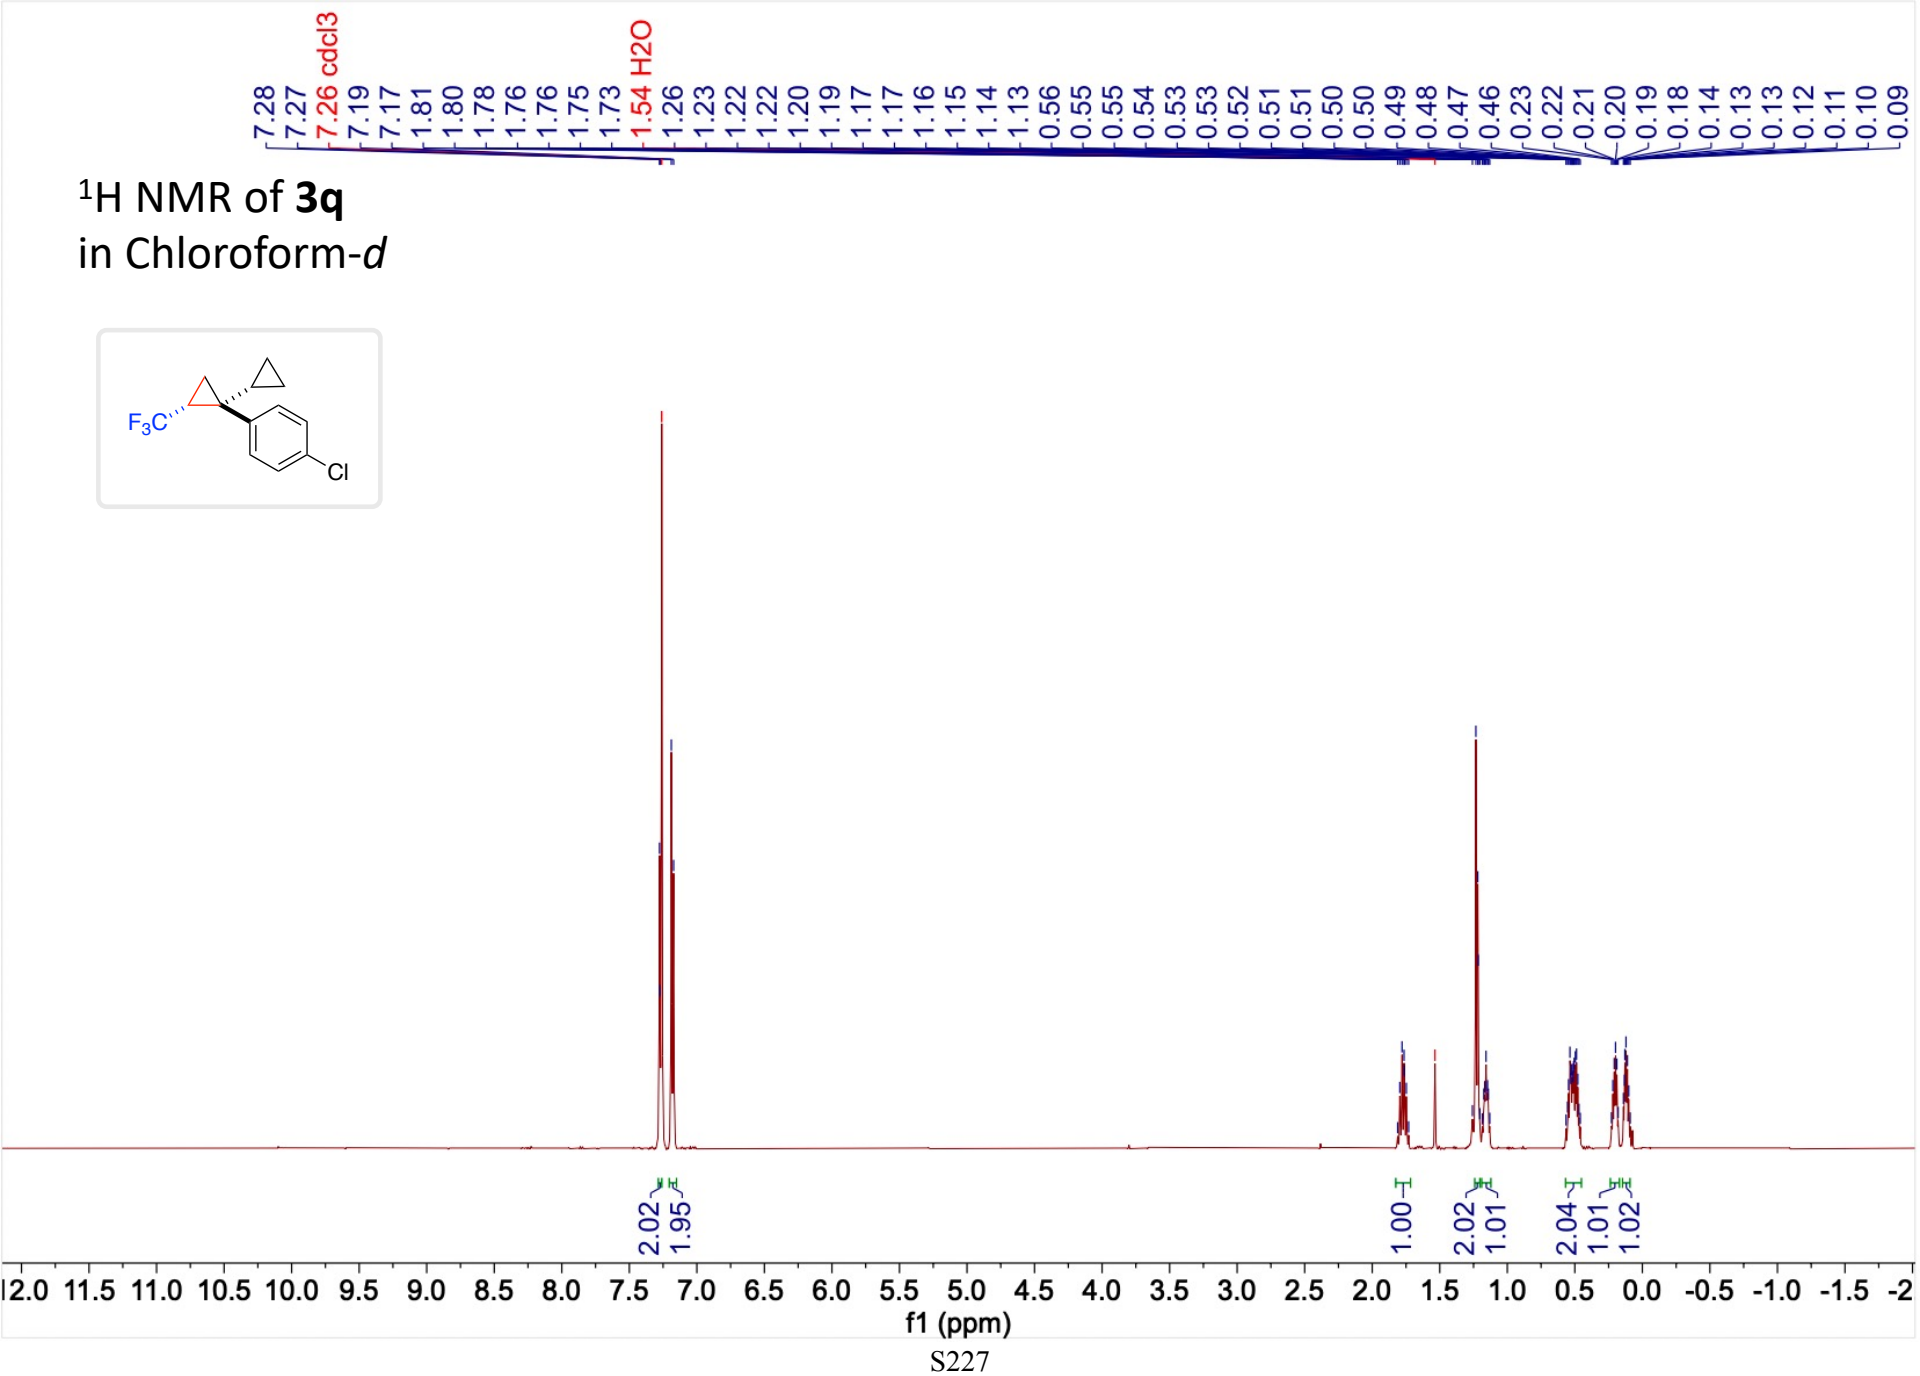

$^{13}\text{C}$  NMR of **3q**  
in Chloroform-*d*

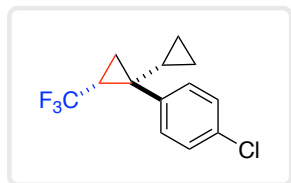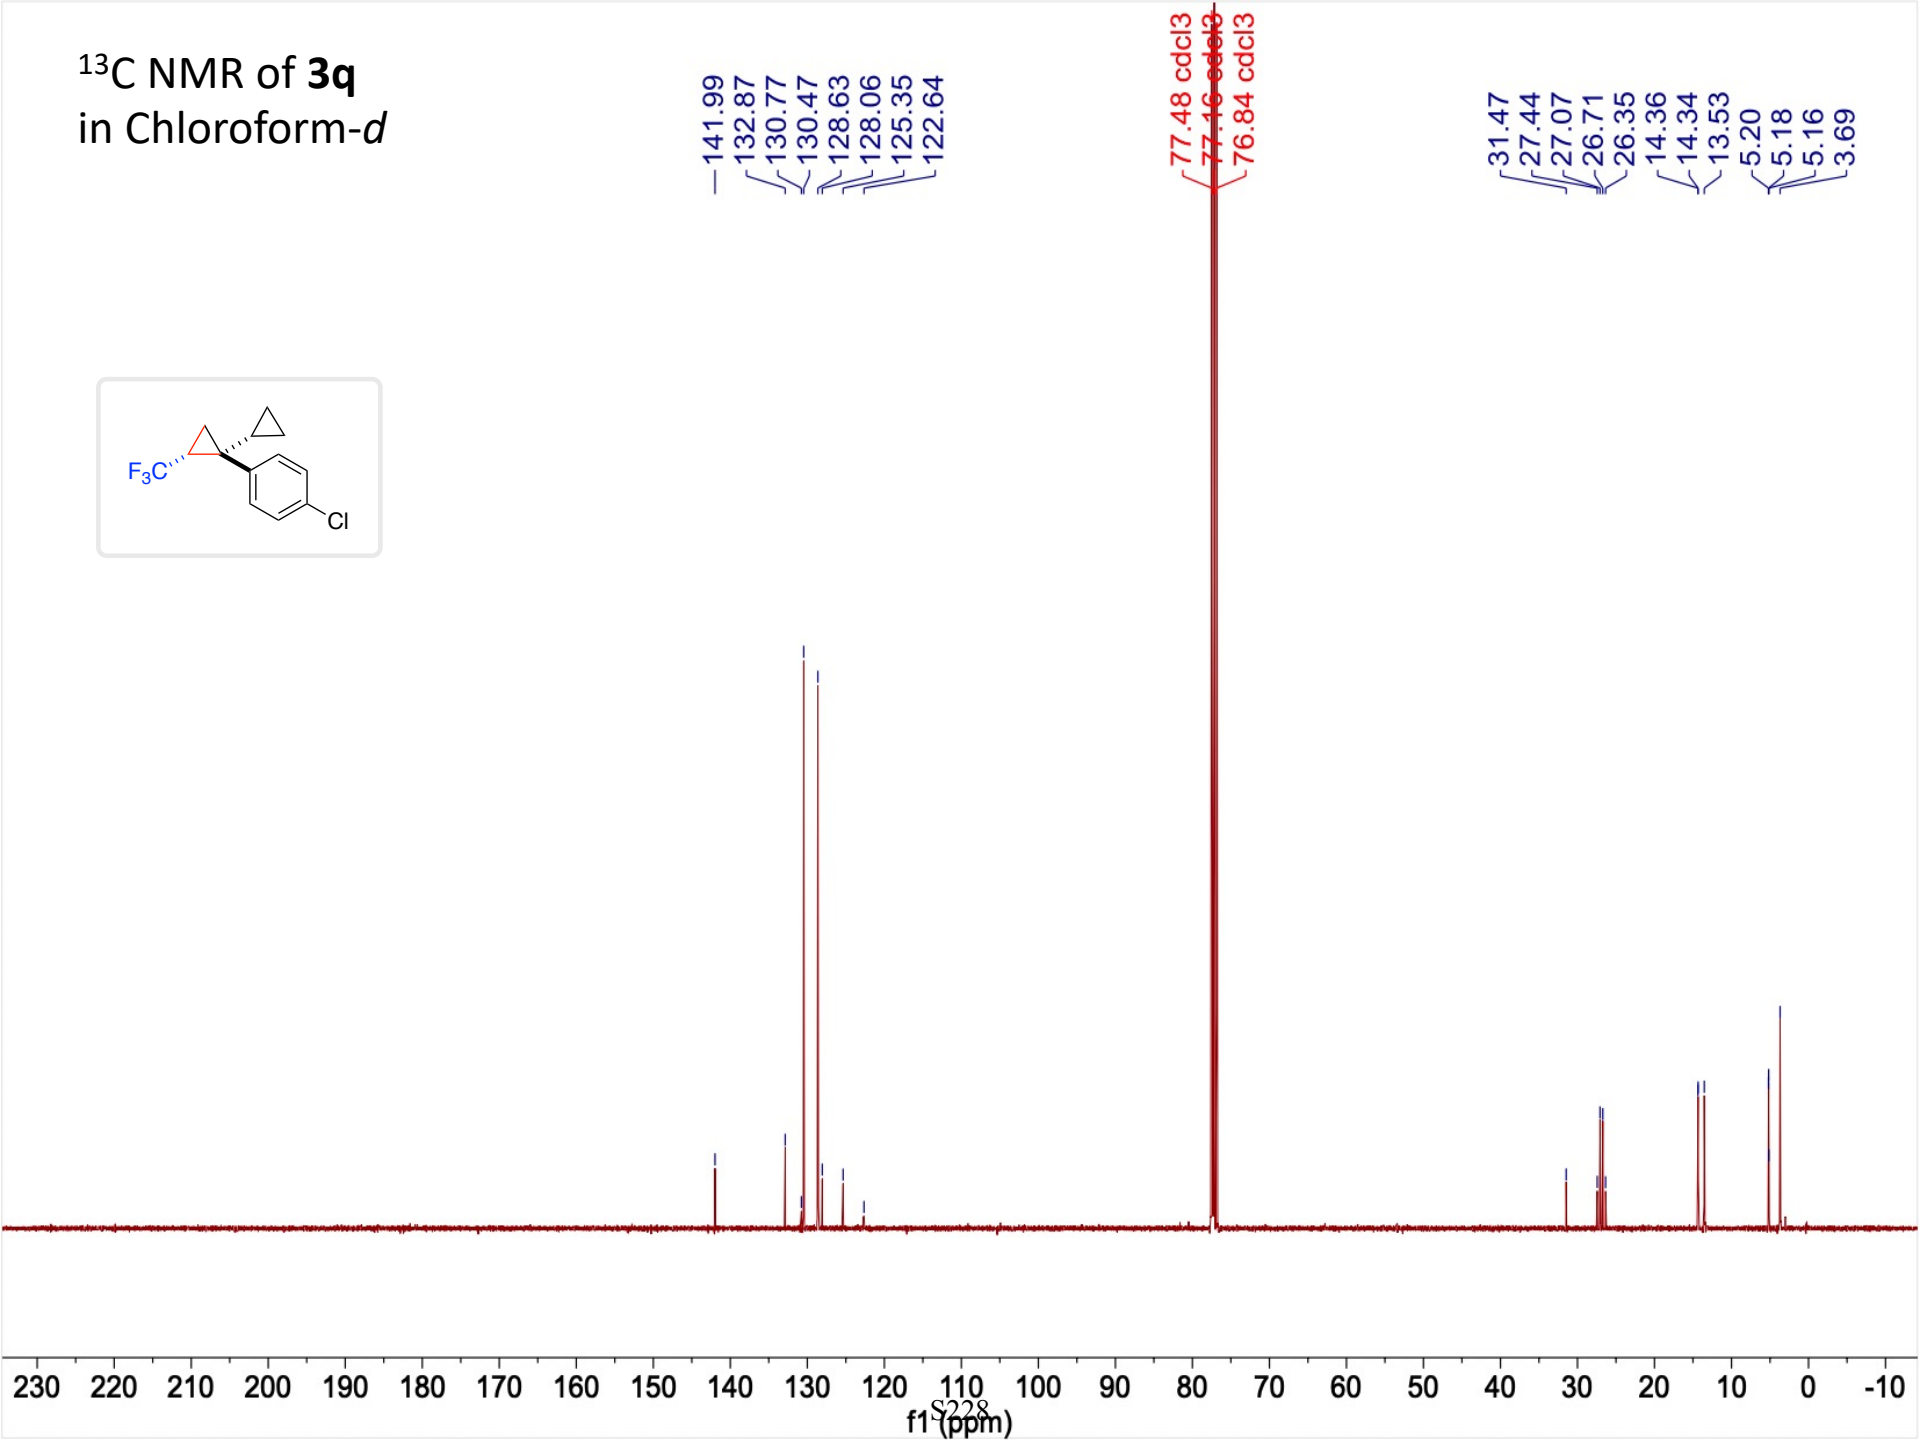

$^{19}\text{F}$  NMR of **3q**  
in Chloroform-*d*

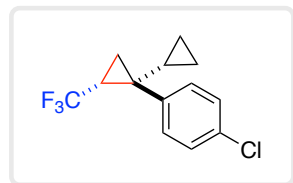

-59.62  
-59.64

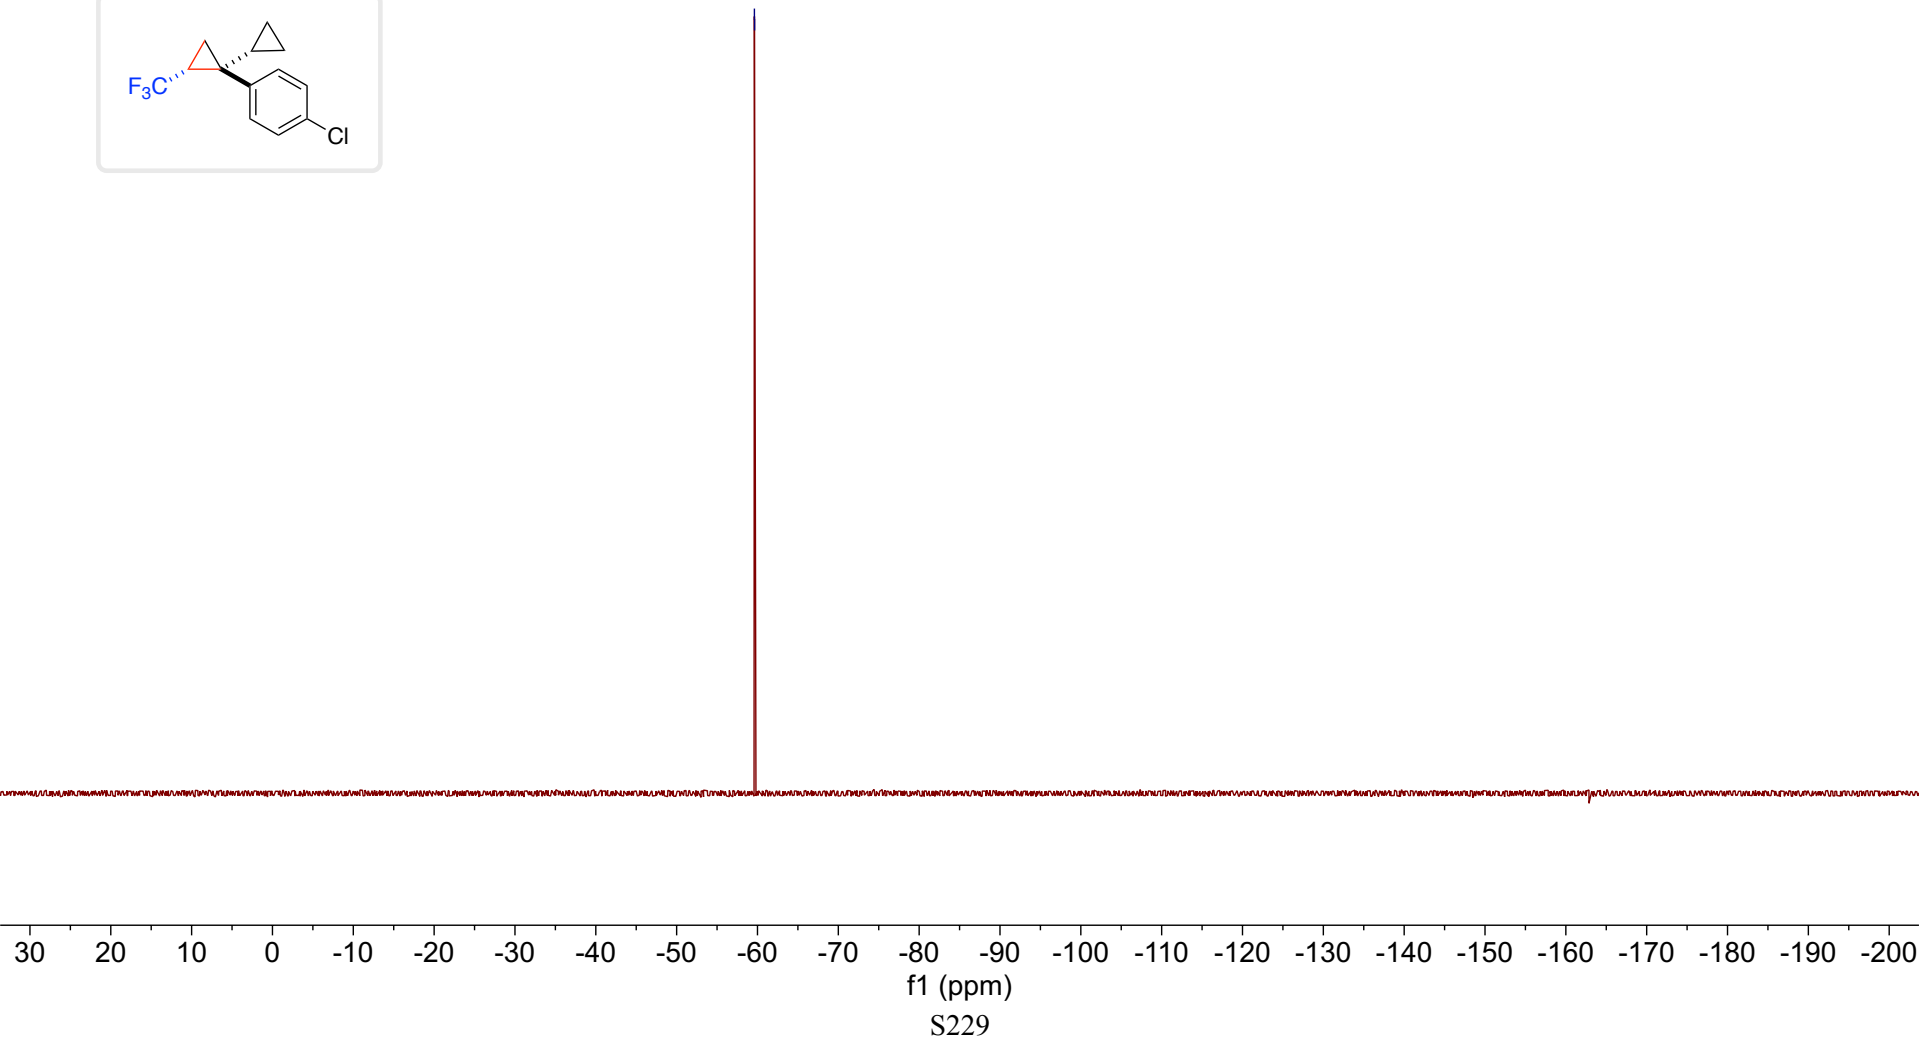

# HPLC of 3q

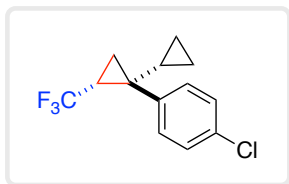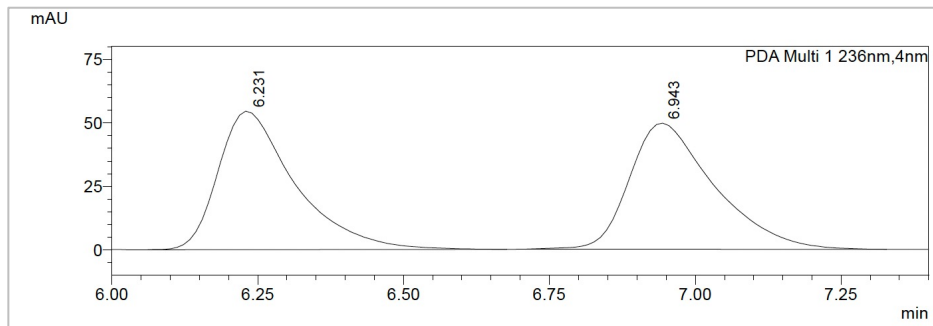

WCL-1422-4-ODH-0.1%0.8mL001\_001.lcd

UV Spectrum

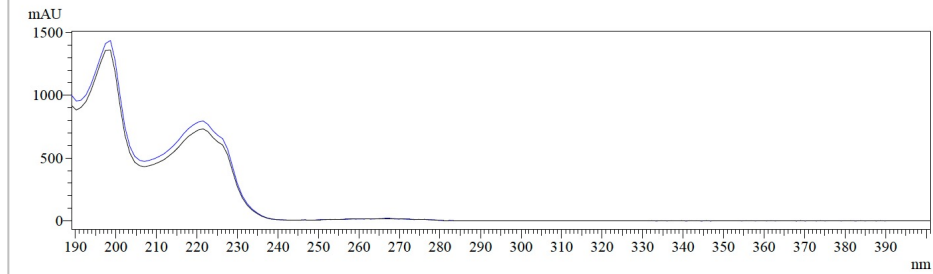

Peak Table  
PDA Ch1 236nm

| Peak# | Ret. Time | Area%   |
|-------|-----------|---------|
| 1     | 6.231     | 49.831  |
| 2     | 6.943     | 50.169  |
| Total |           | 100.000 |

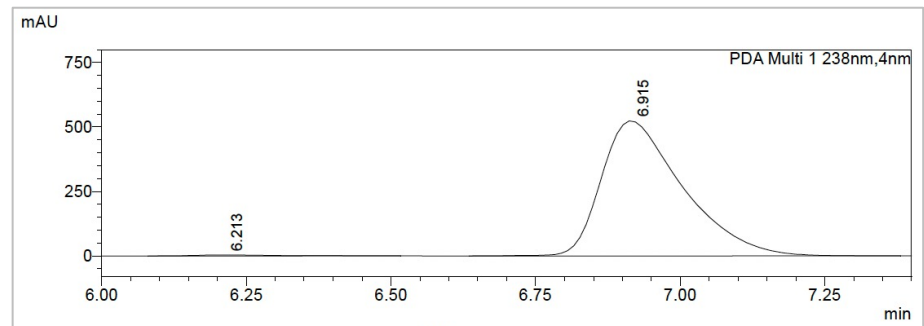

WCL-1423-3-ODH-0.1%0.8mL\_002.lcd

UV Spectrum

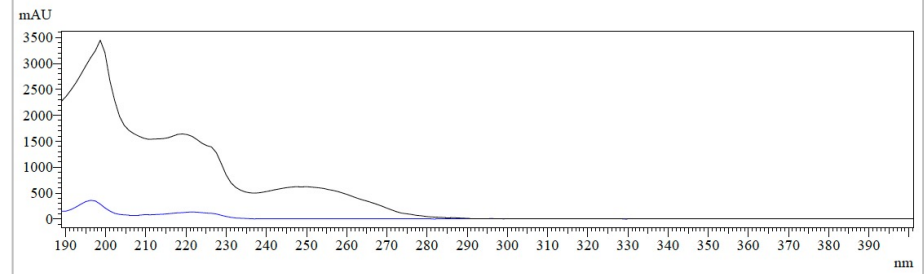

Peak Table  
PDA Ch1 238nm

| Peak# | Ret. Time | Area%   |
|-------|-----------|---------|
| 1     | 6.213     | 0.839   |
| 2     | 6.915     | 99.161  |
| Total |           | 100.000 |

<sup>1</sup>H NMR of **3r**  
in Chloroform-*d*

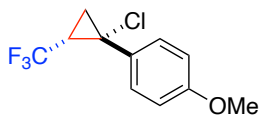

7.40  
7.37  
7.26 cdcl3  
6.89  
6.87

3.81  
2.10  
2.08  
2.08  
2.07  
2.06  
2.05  
2.04  
2.03  
2.02  
2.01  
1.85  
1.84  
1.82  
1.77  
1.75  
1.75  
1.73  
1.54 H2O

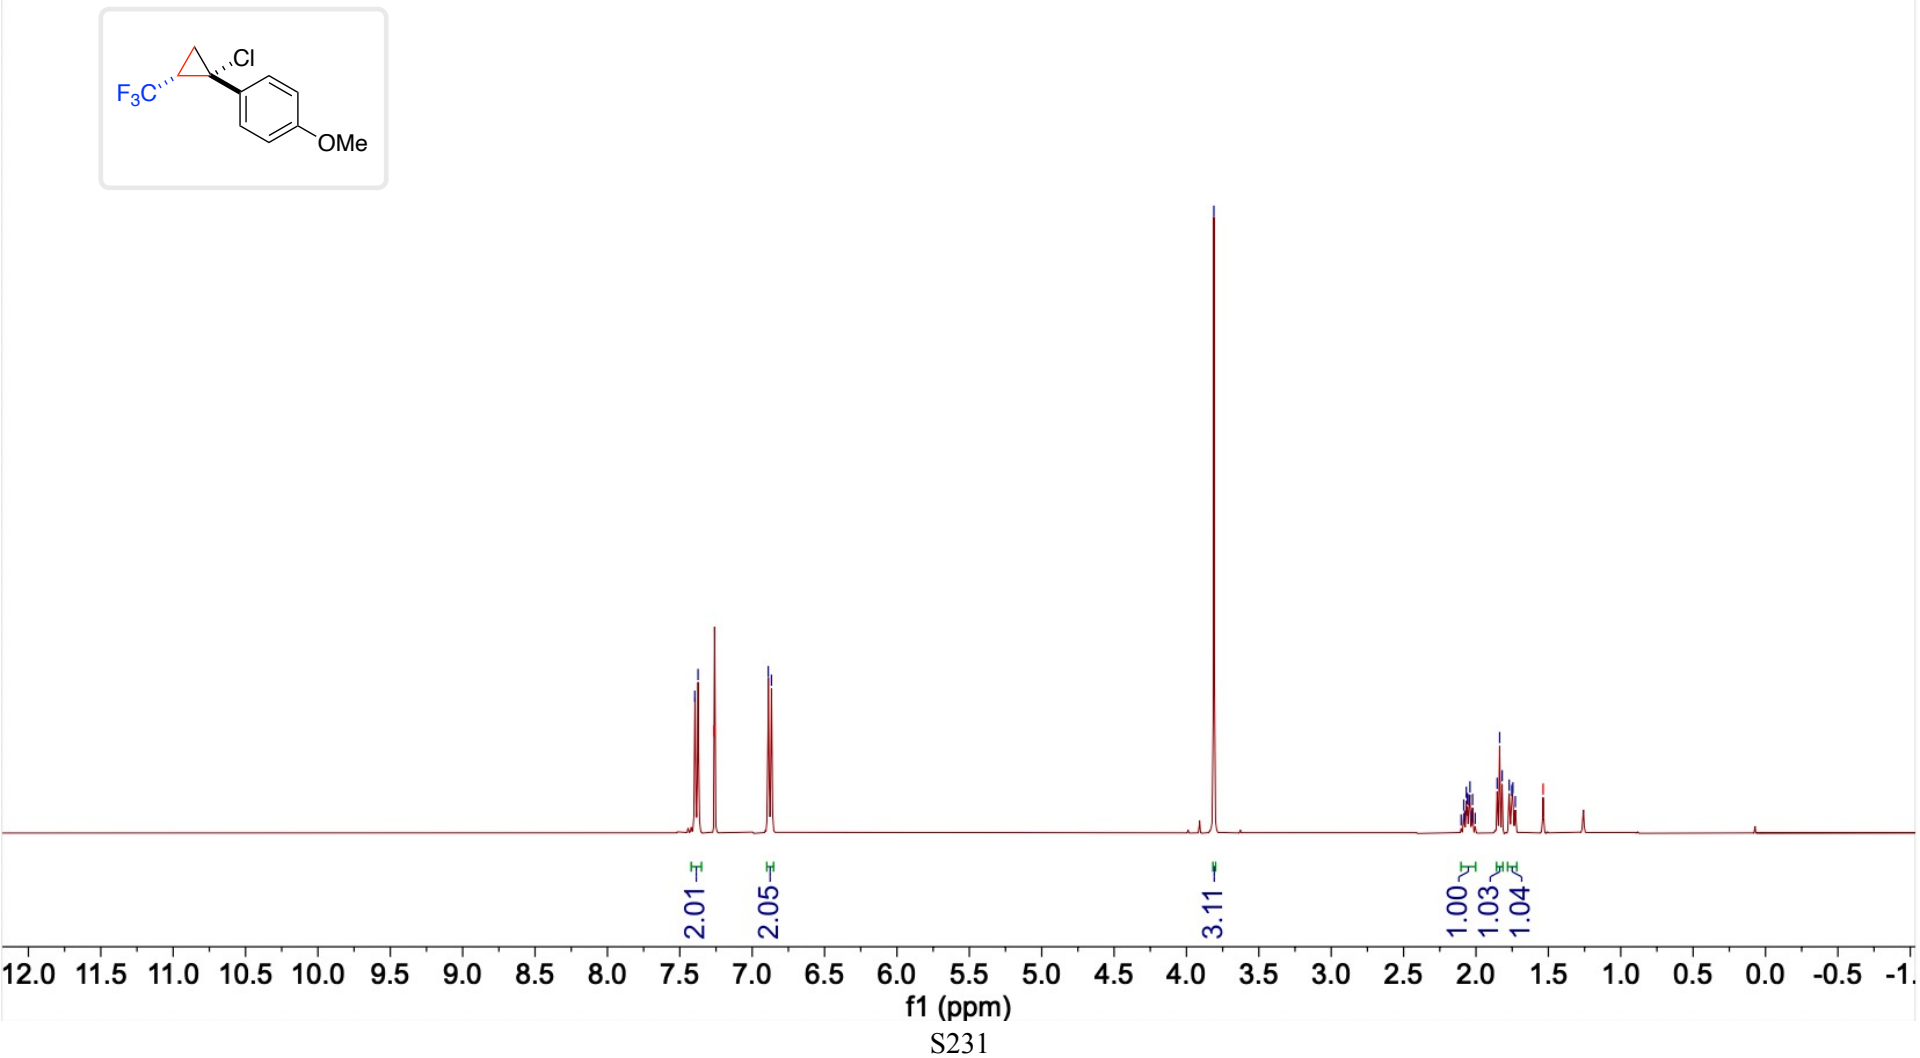



<sup>13</sup>C NMR of **3r**  
in Chloroform-*d*

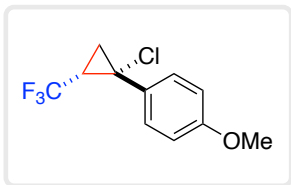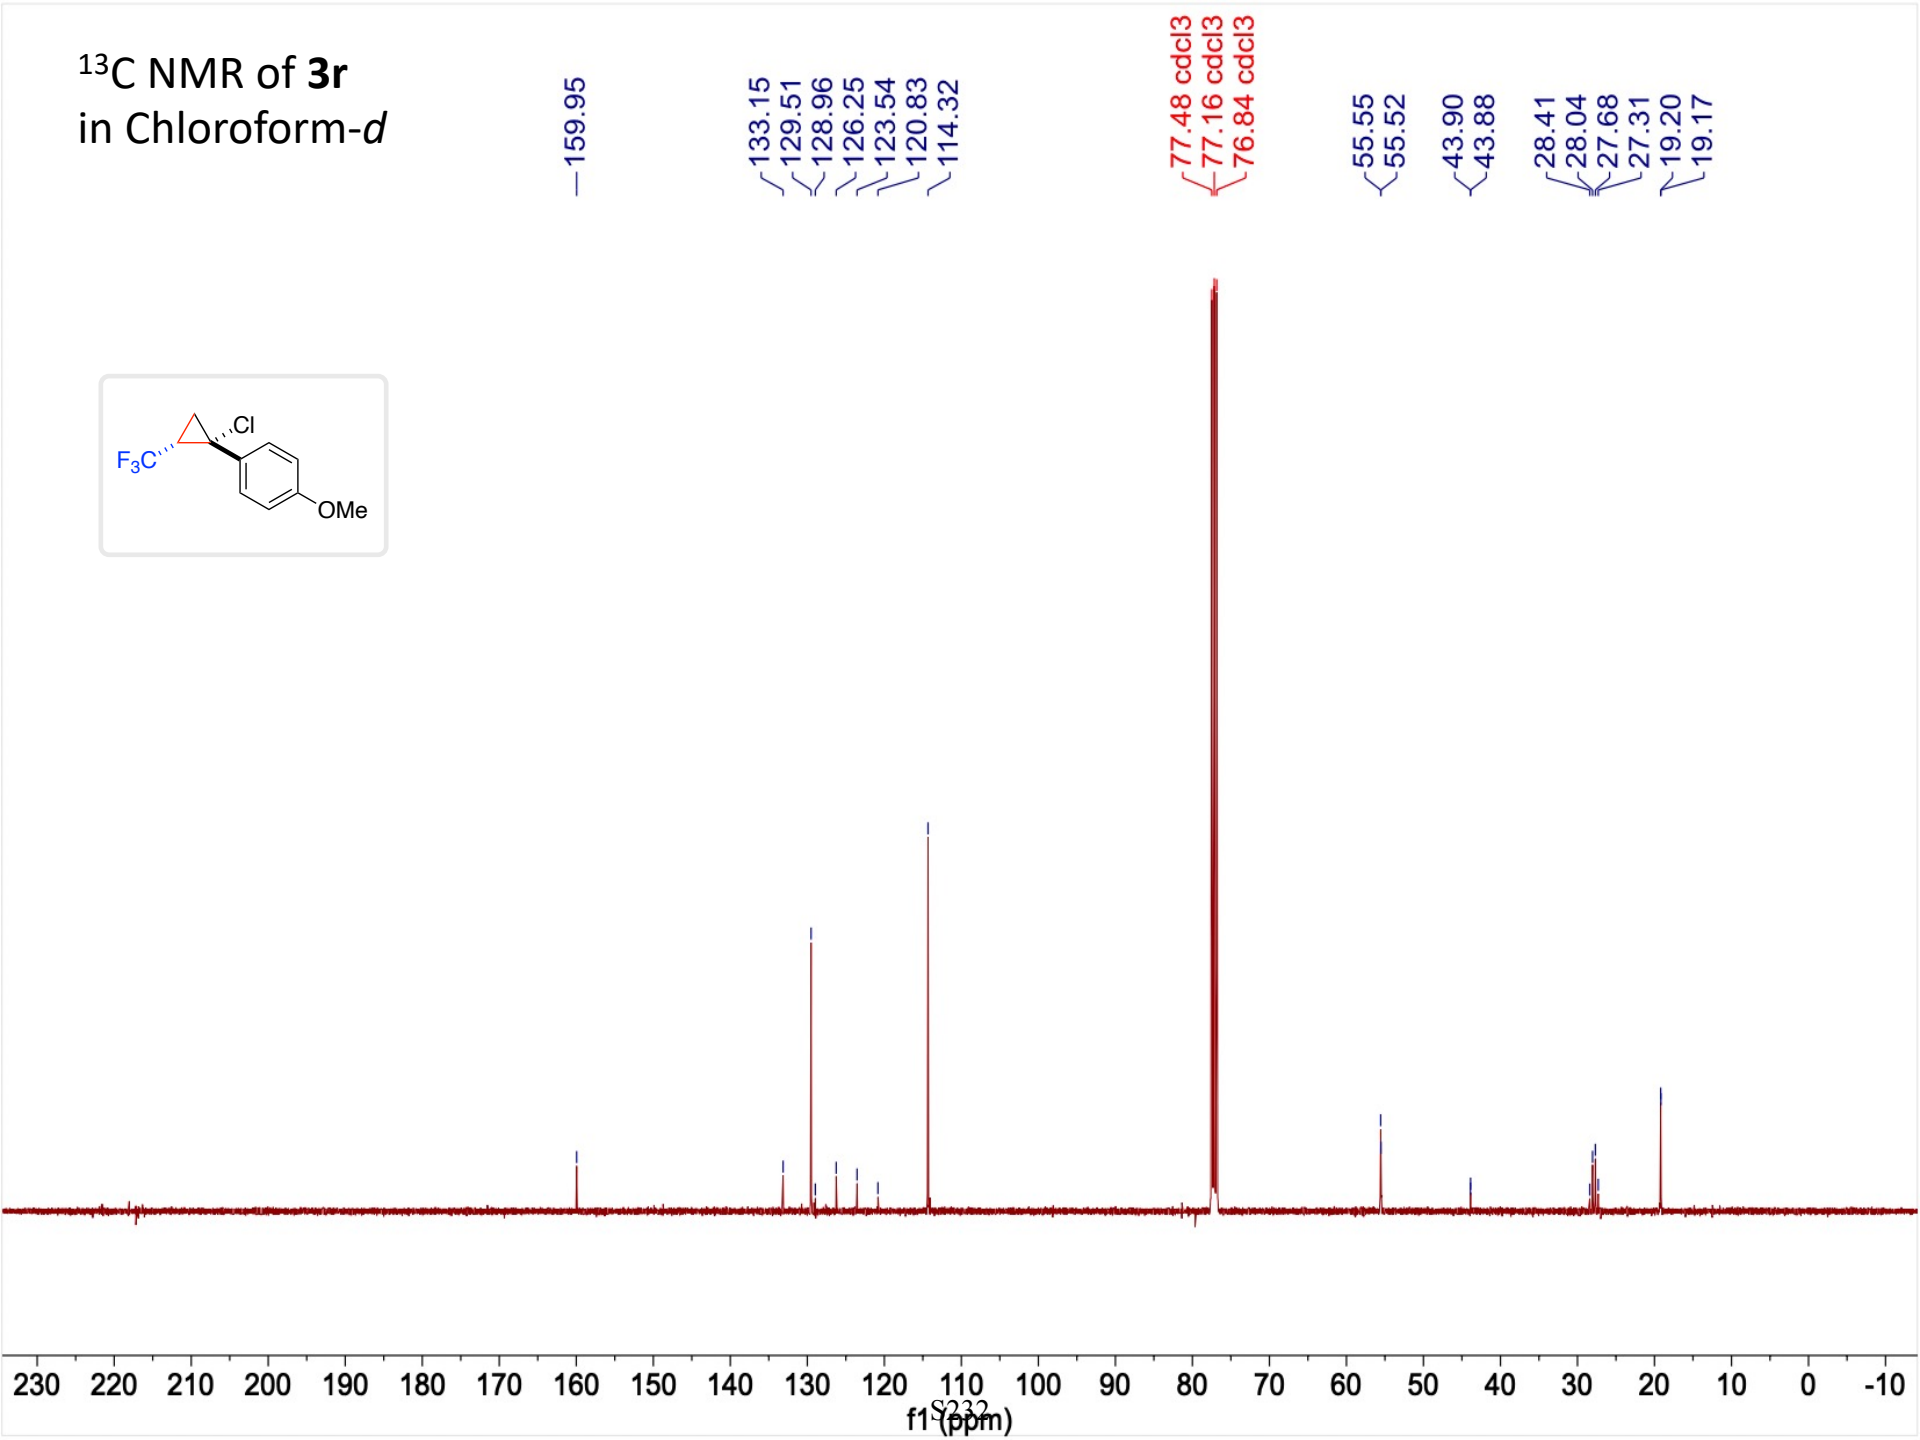

$^{19}\text{F}$  NMR of **3r**  
in Chloroform-*d*

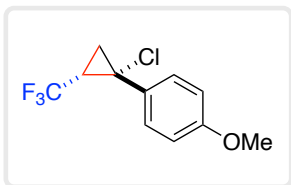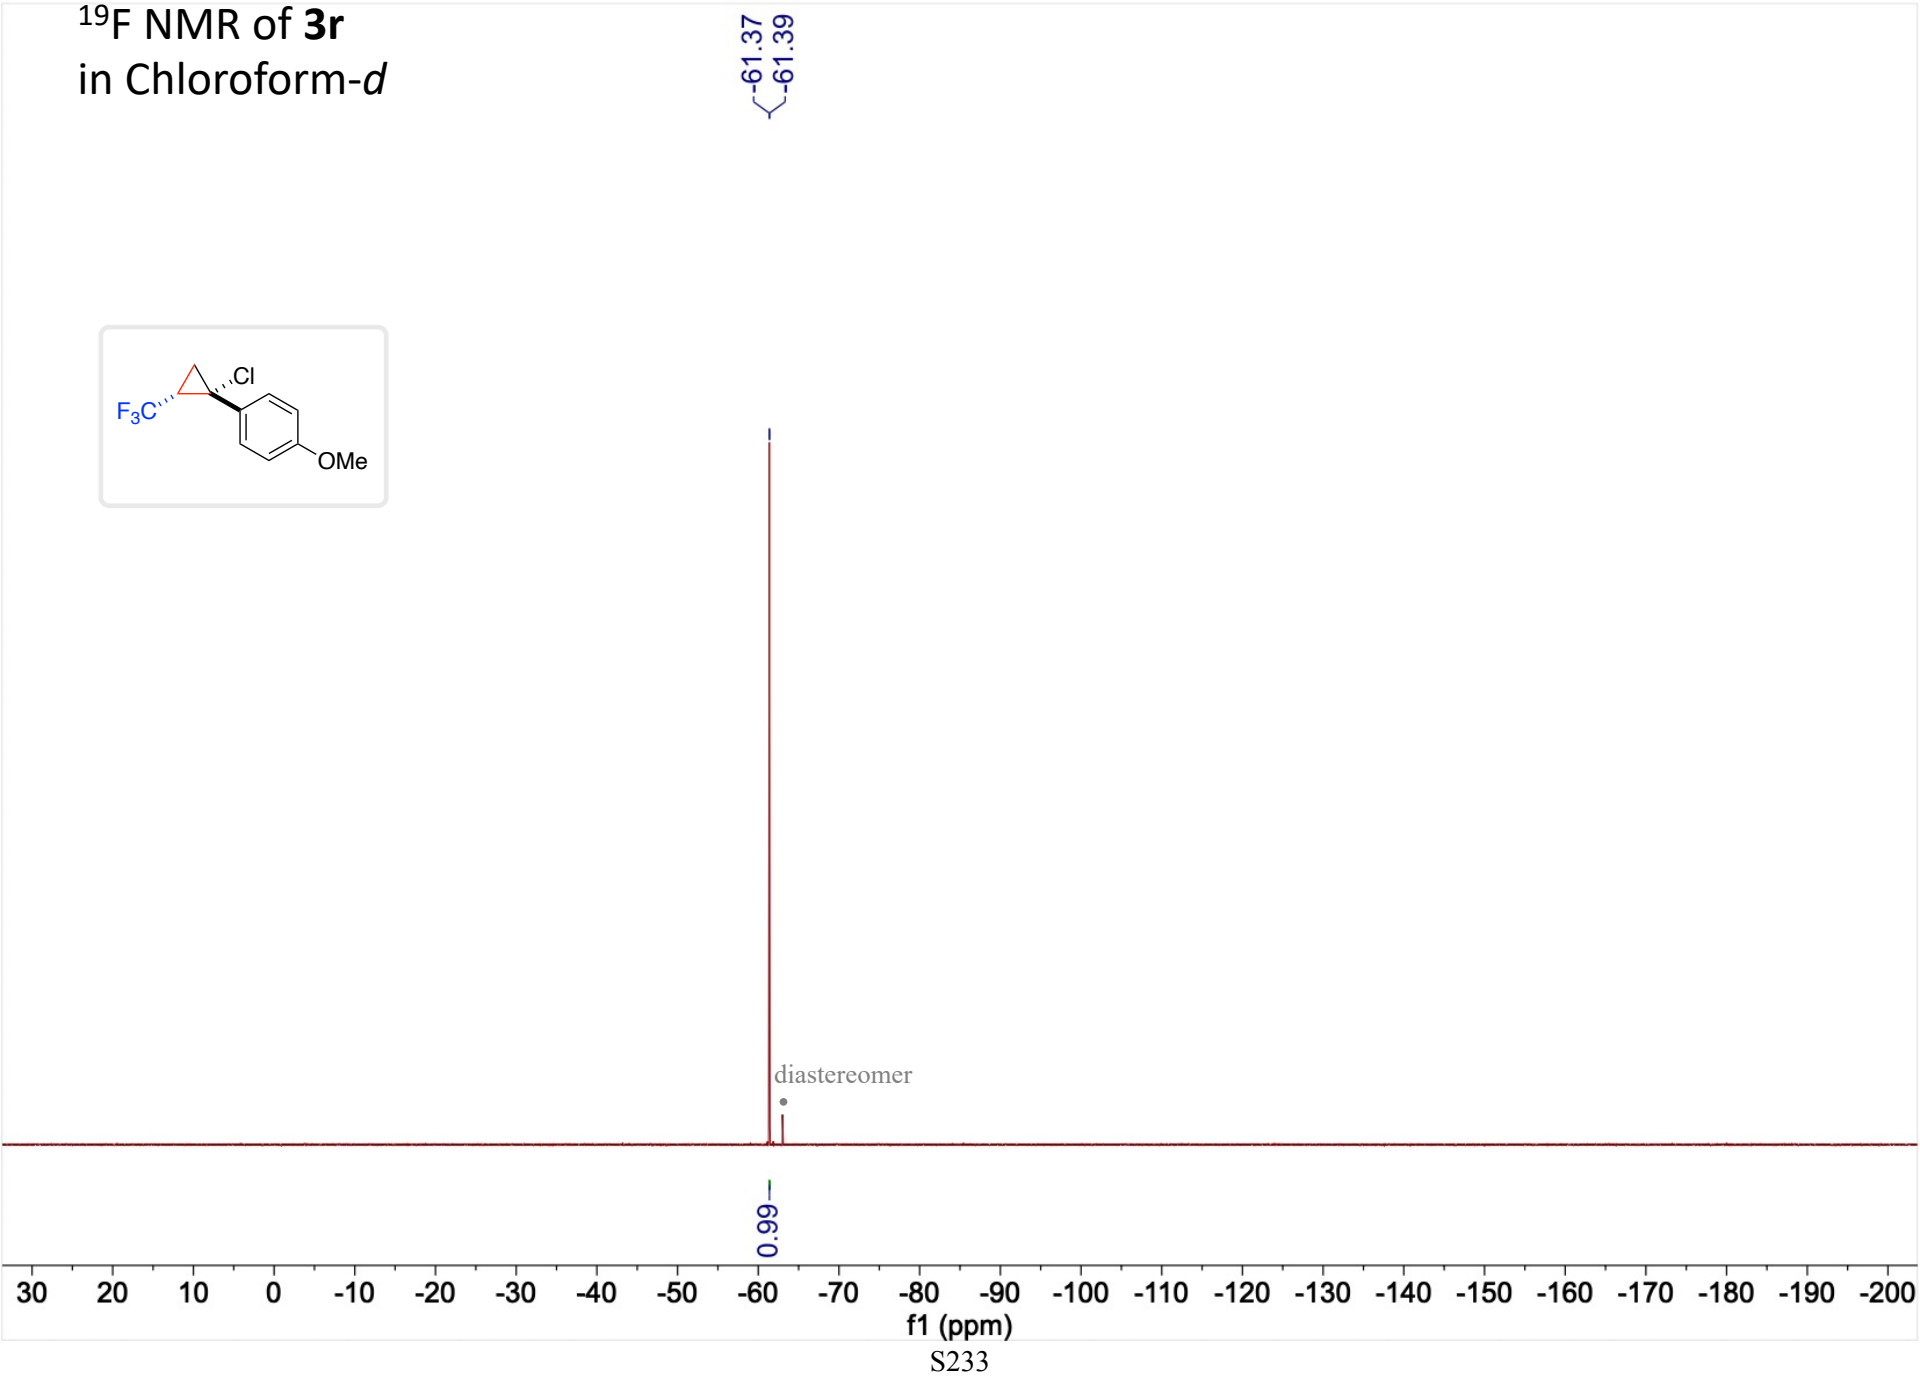

# HPLC of 3r

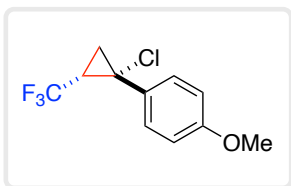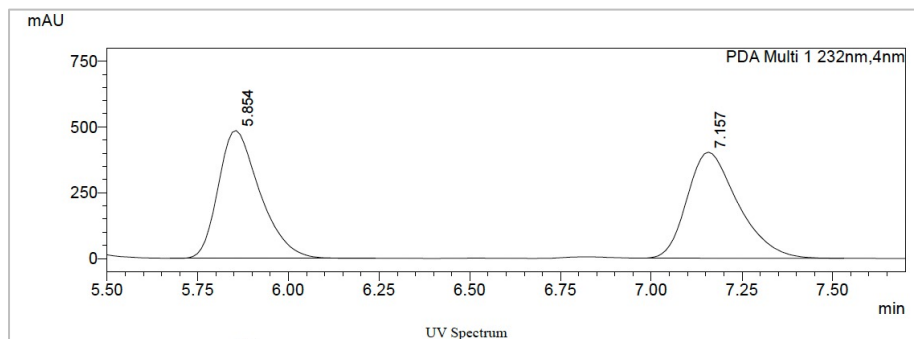

WCL-1441-3-ODH-5%0.8mL\_001.lcd

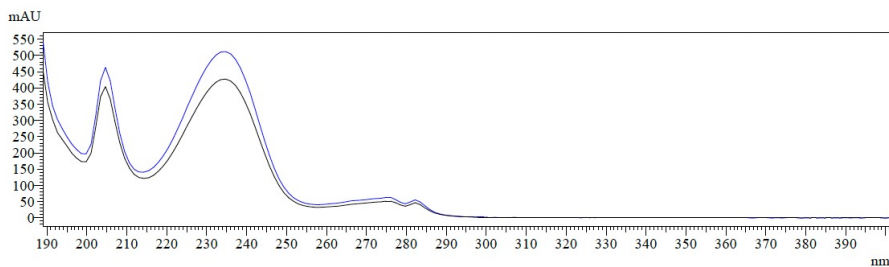

Peak Table

| Peak# | Ret. Time | Area%   |
|-------|-----------|---------|
| 1     | 5.854     | 49.637  |
| 2     | 7.157     | 50.363  |
| Total |           | 100.000 |

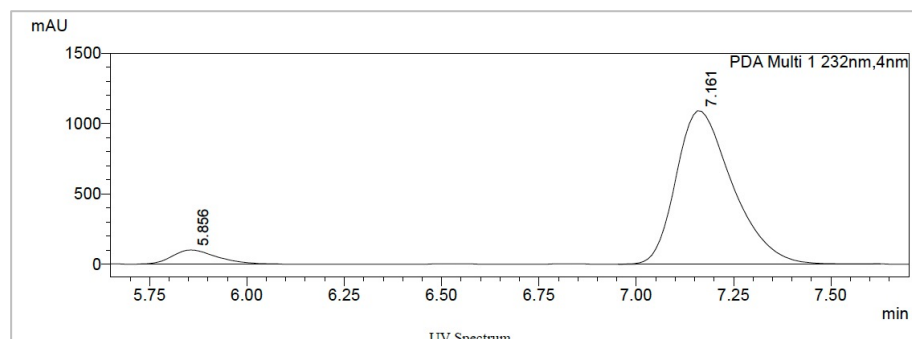

WCL-1442-3-ODH-5%0.8mL\_002.lcd

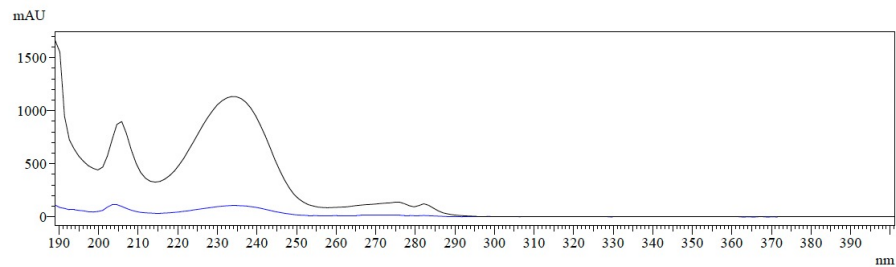

Peak Table

| Peak# | Ret. Time | Area%   |
|-------|-----------|---------|
| 1     | 5.856     | 6.695   |
| 2     | 7.161     | 93.305  |
| Total |           | 100.000 |

<sup>1</sup>H NMR of **3s**  
in Chloroform-*d*

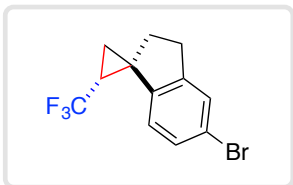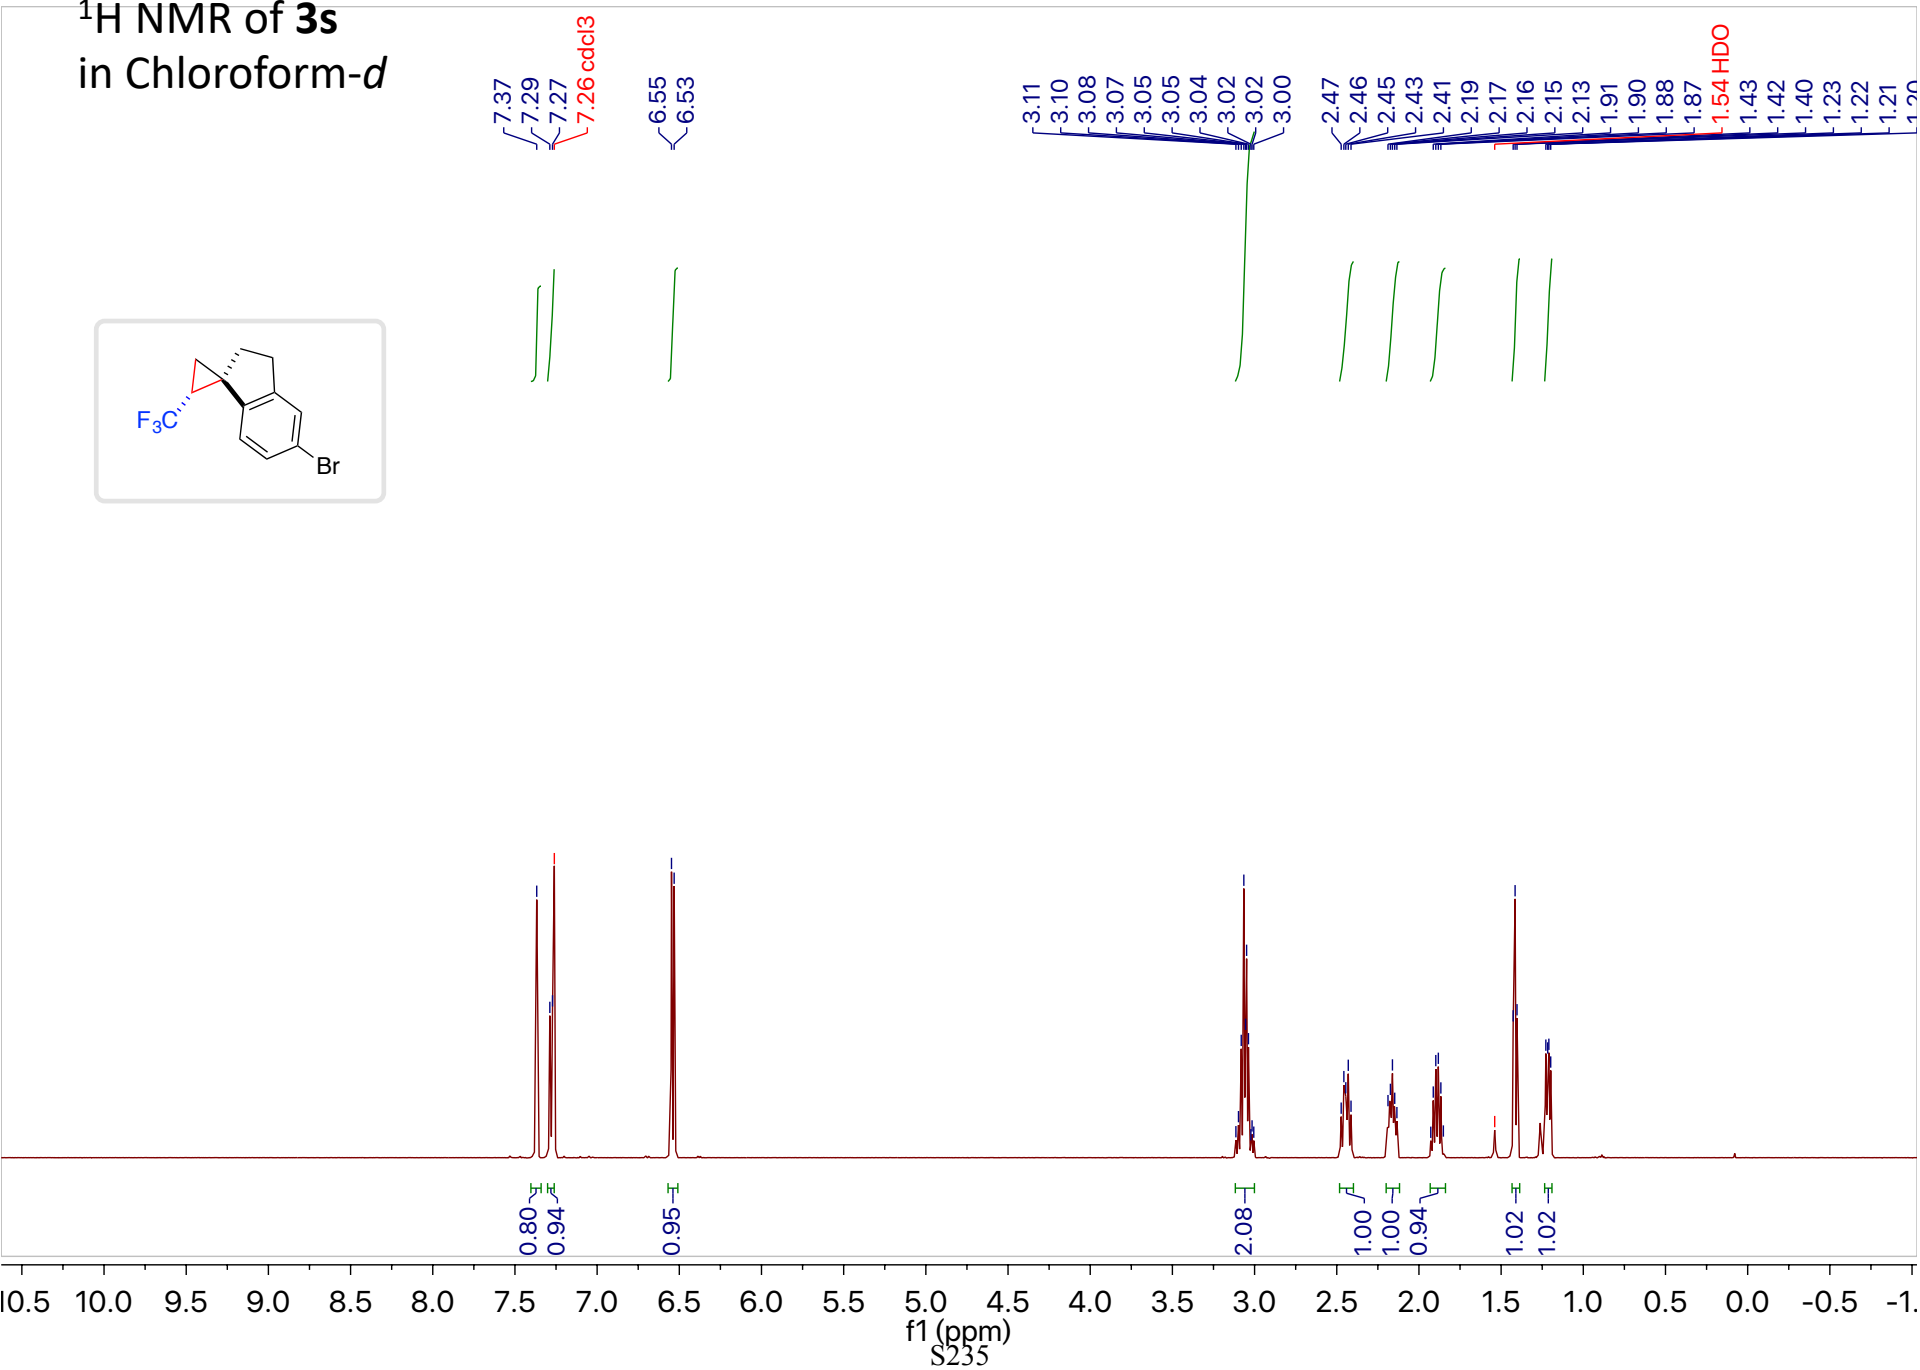

<sup>13</sup>C NMR of **3s**  
in Chloroform-*d*

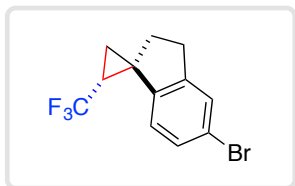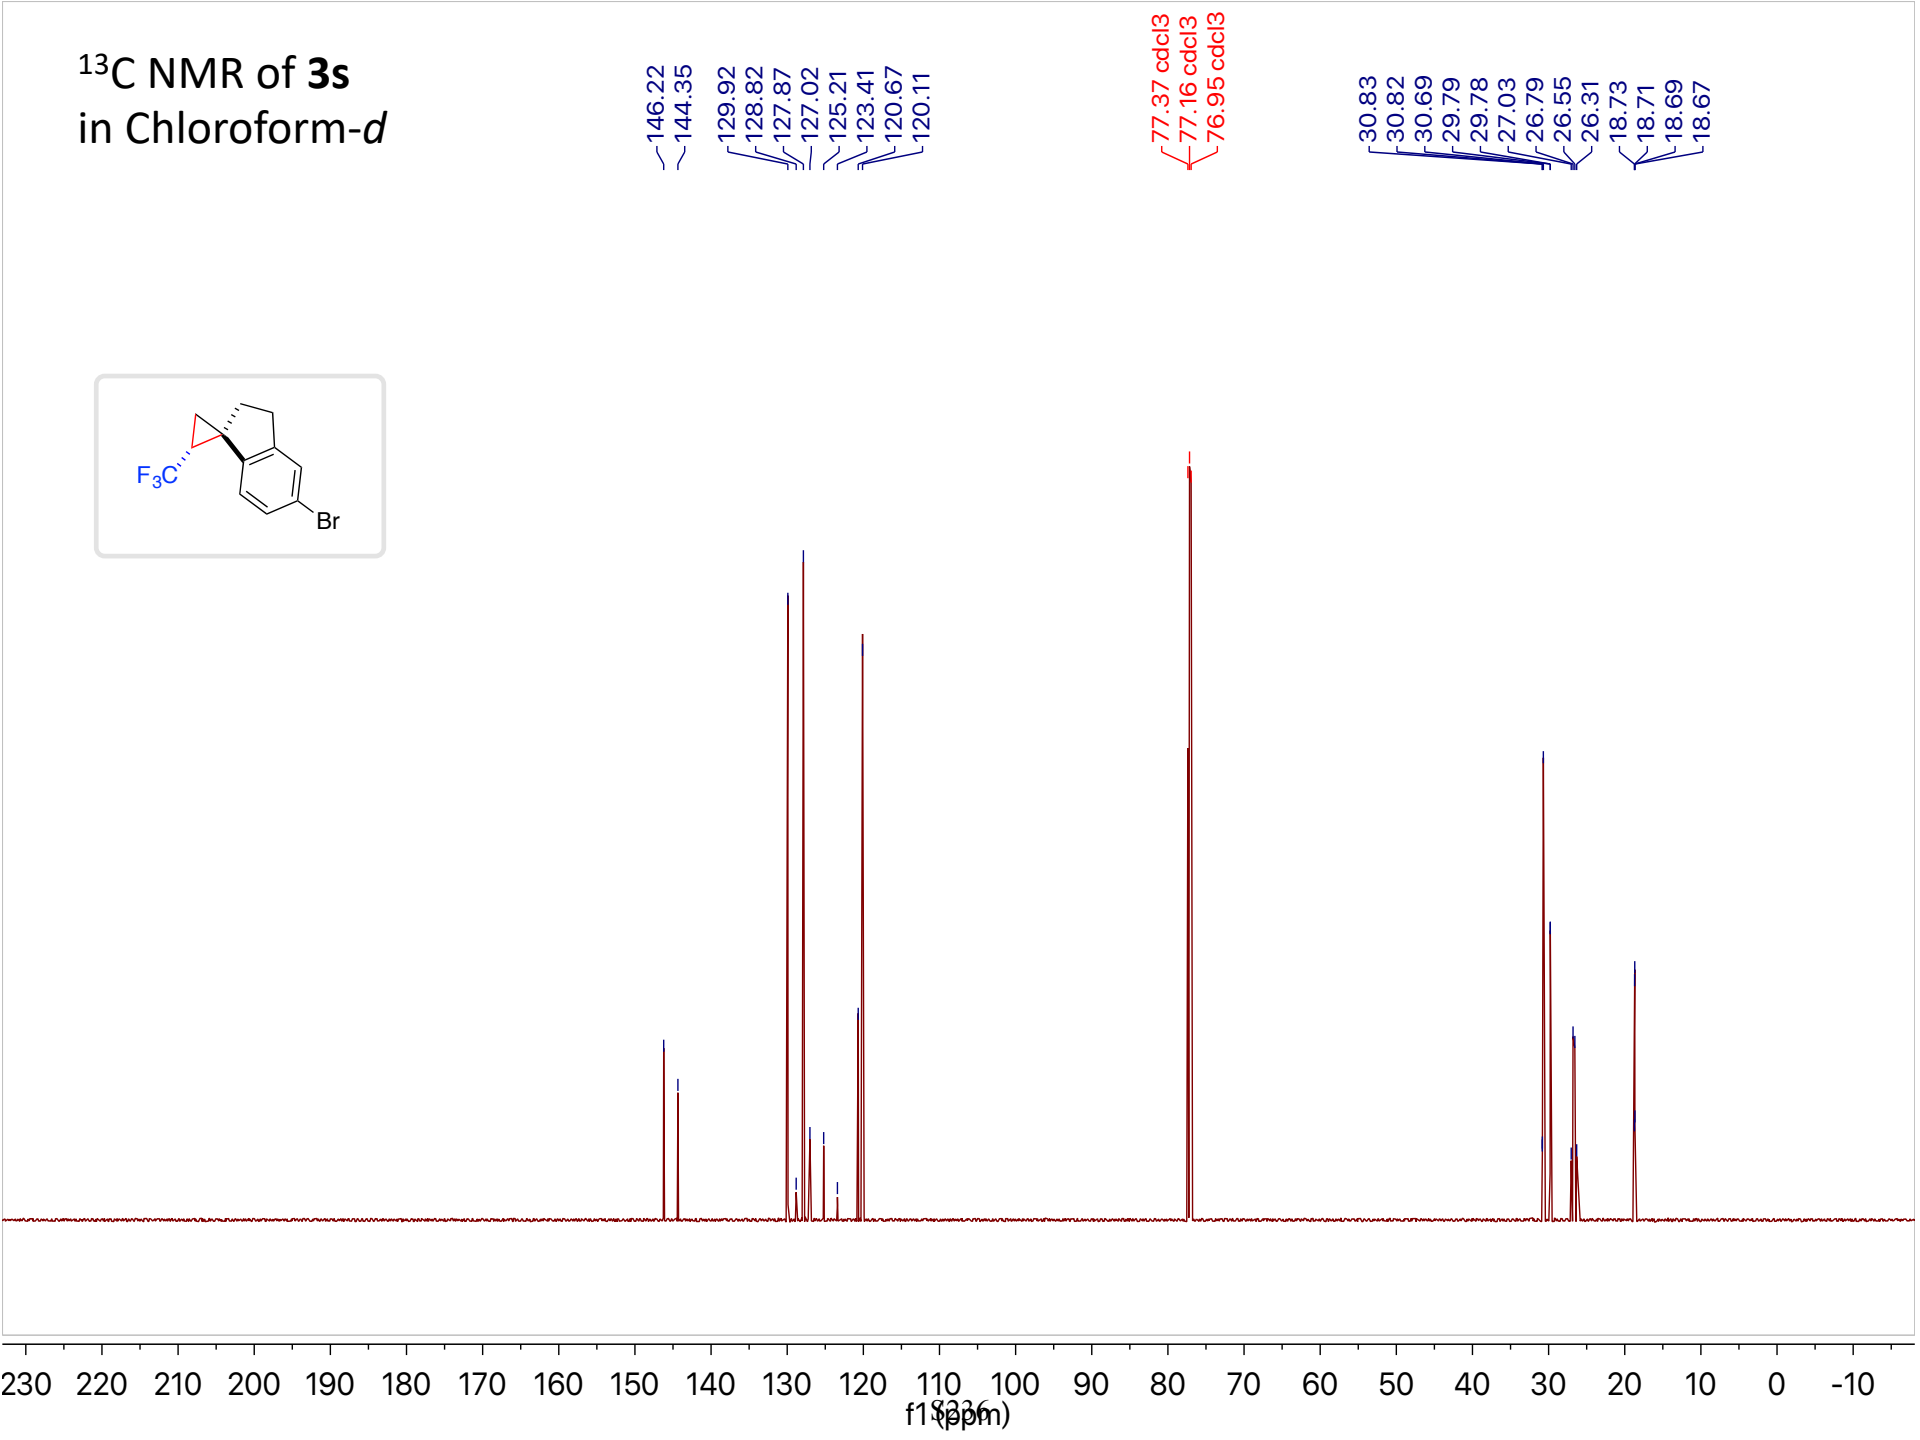

$^{19}\text{F}$  NMR of **3s**  
in Chloroform-*d*

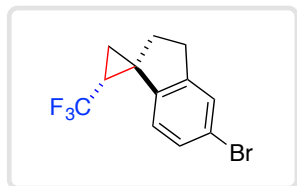

-62.53  
-62.55

0 20 10 0 -10 -20 -30 -40 -50 -60 -70 -80 -90 -100 -110 -120 -130 -140 -150 -160 -170 -180 -190 -200

f1 (ppm)

S237

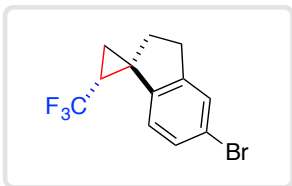

# HPLC of 3s

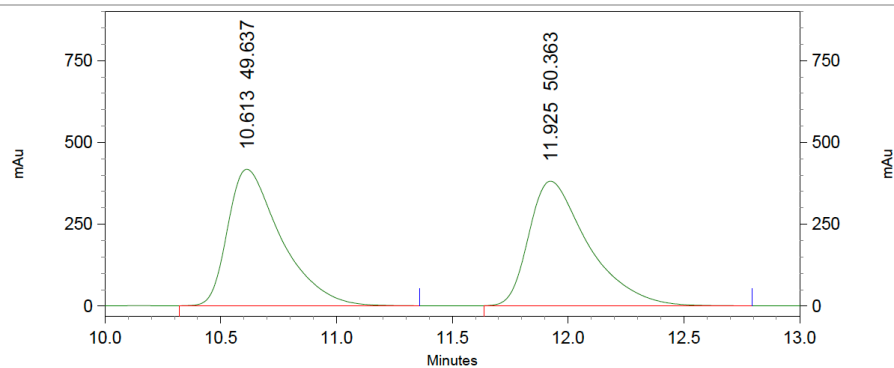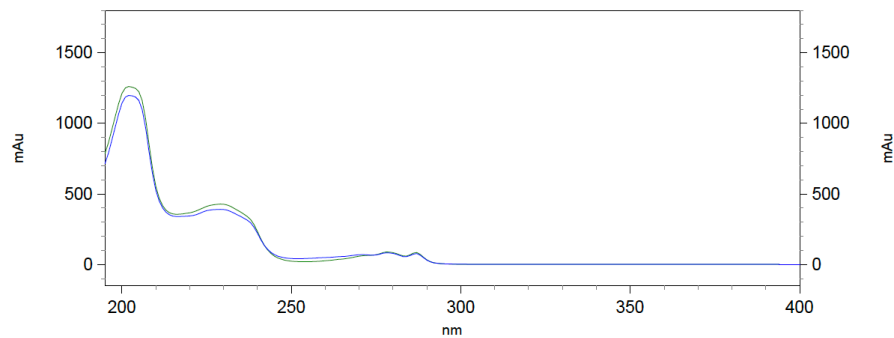

2: 231 nm, 4  
nm Results

| Pk # | Retention Time | Area Percent |
|------|----------------|--------------|
| 1    | 10.613         | 49.637       |
| 2    | 11.925         | 50.363       |

|        |  |         |
|--------|--|---------|
| Totals |  | 100.000 |
|--------|--|---------|

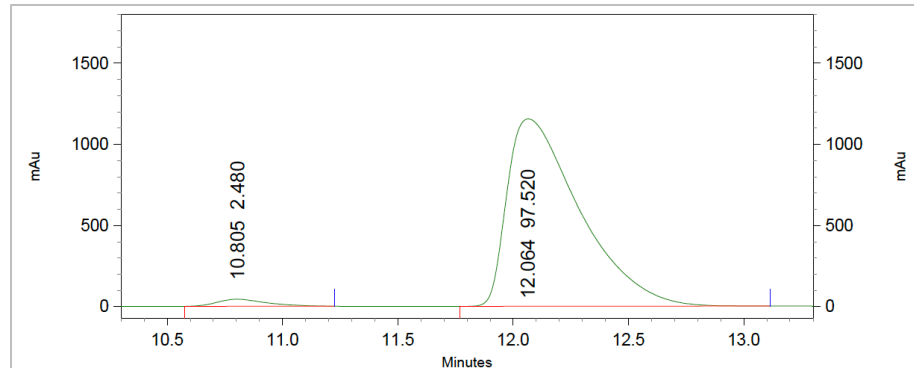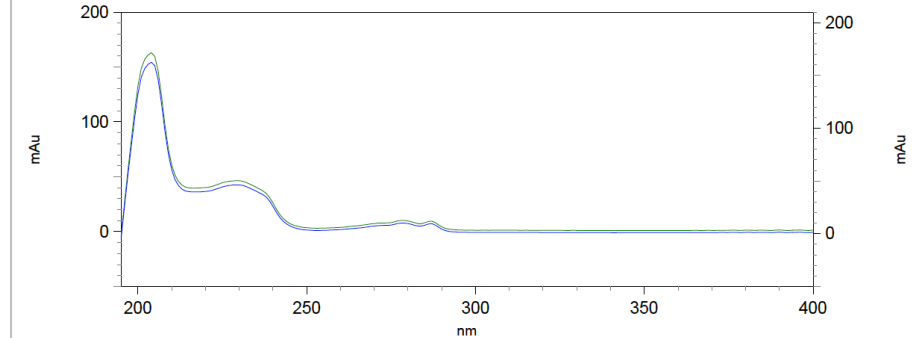

2: 231 nm, 4  
nm Results

| Pk # | Retention Time | Area Percent |
|------|----------------|--------------|
| 1    | 10.805         | 2.480        |
| 2    | 12.064         | 97.520       |

|        |  |         |
|--------|--|---------|
| Totals |  | 100.000 |
|--------|--|---------|

<sup>1</sup>H NMR of **3t**  
in Chloroform-*d*

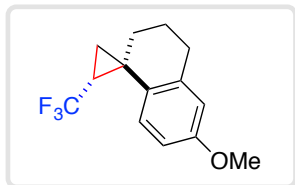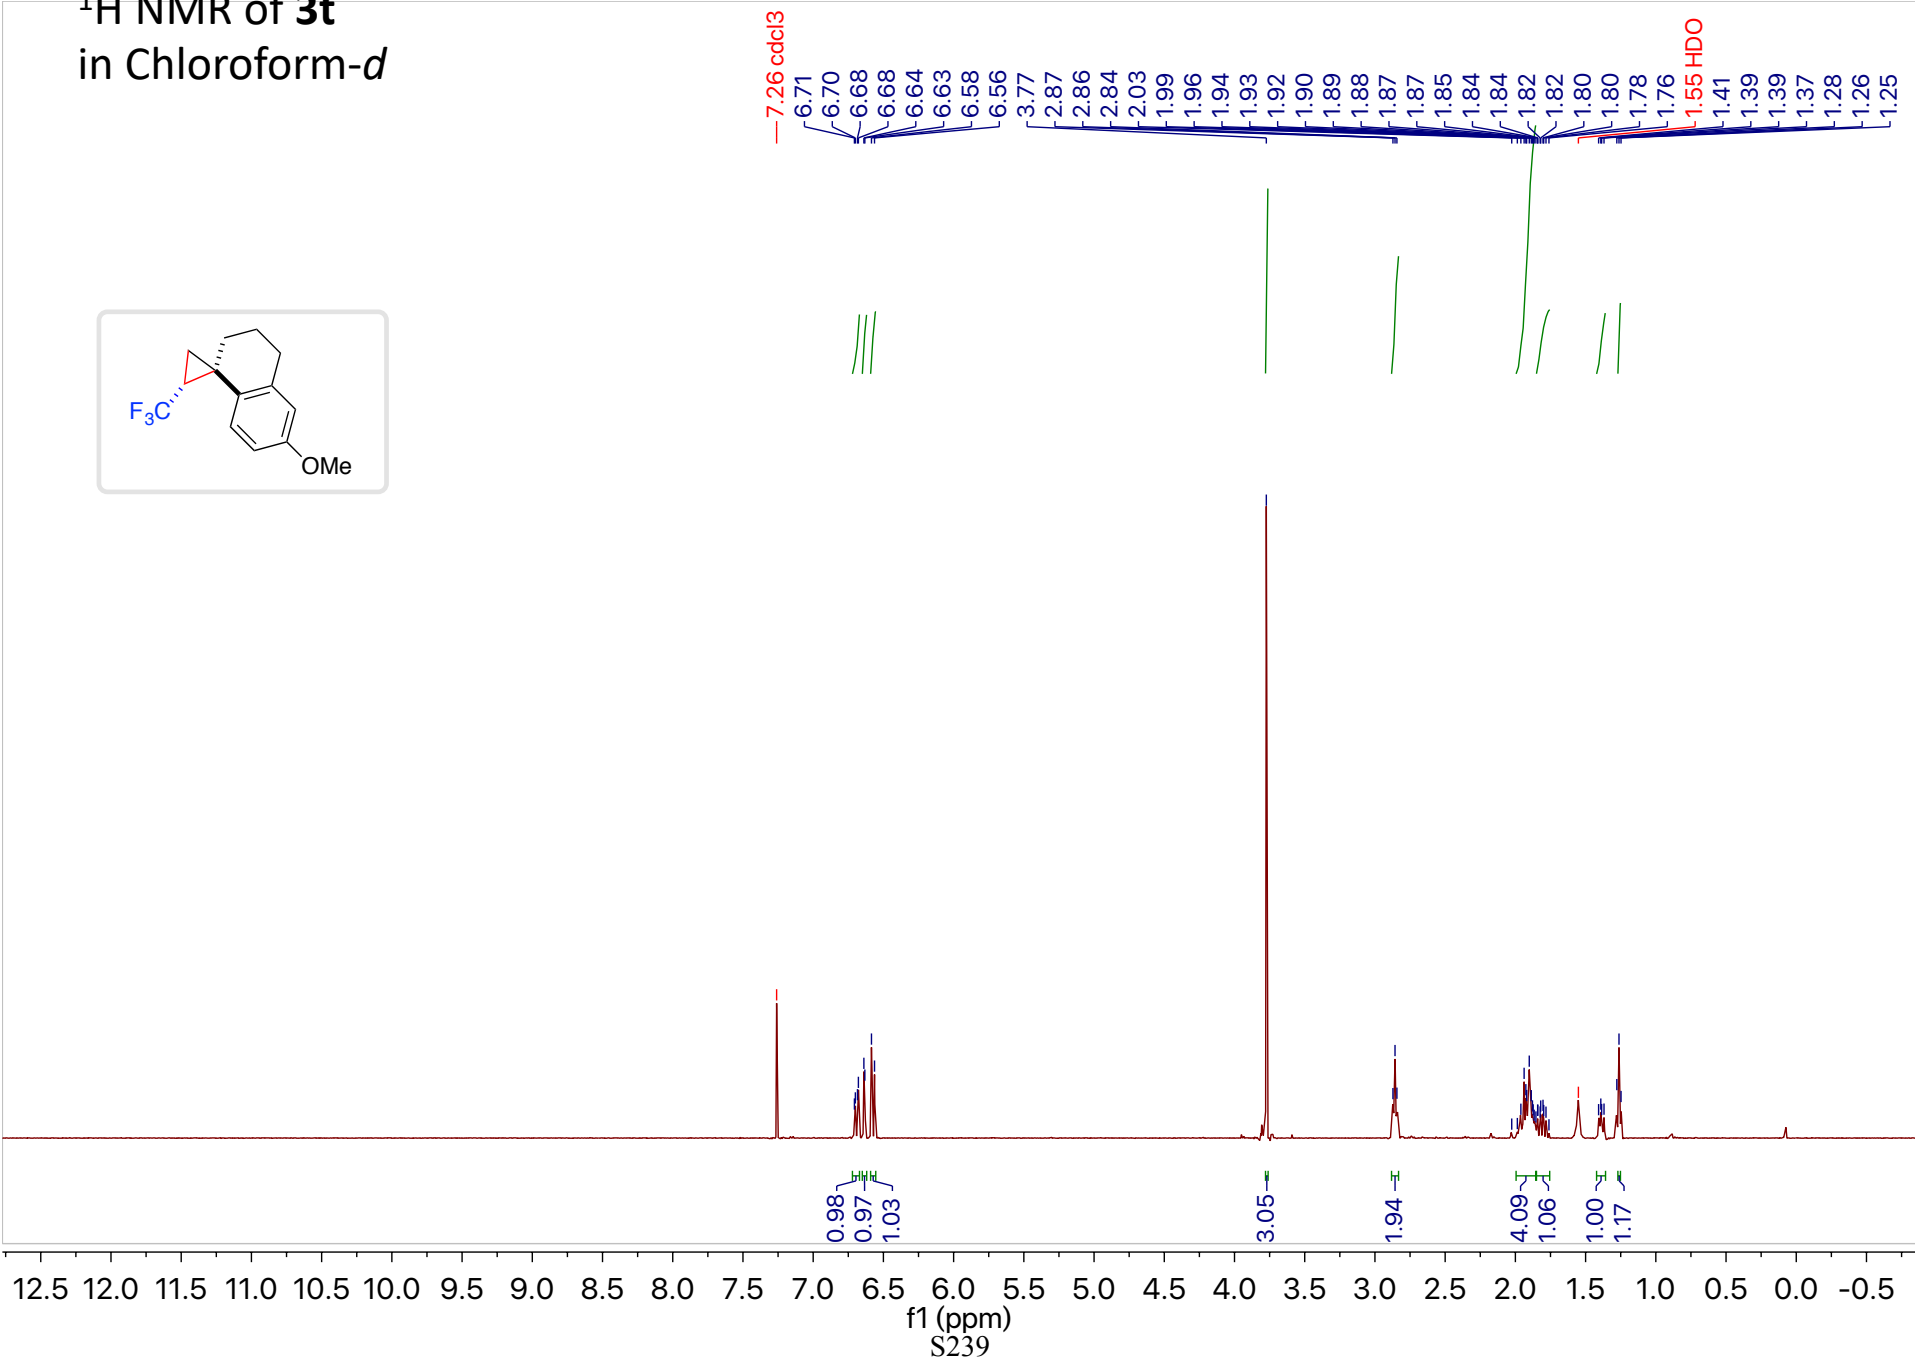



$^{13}\text{C}$  NMR of **3t**  
in Chloroform-*d*

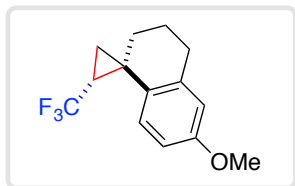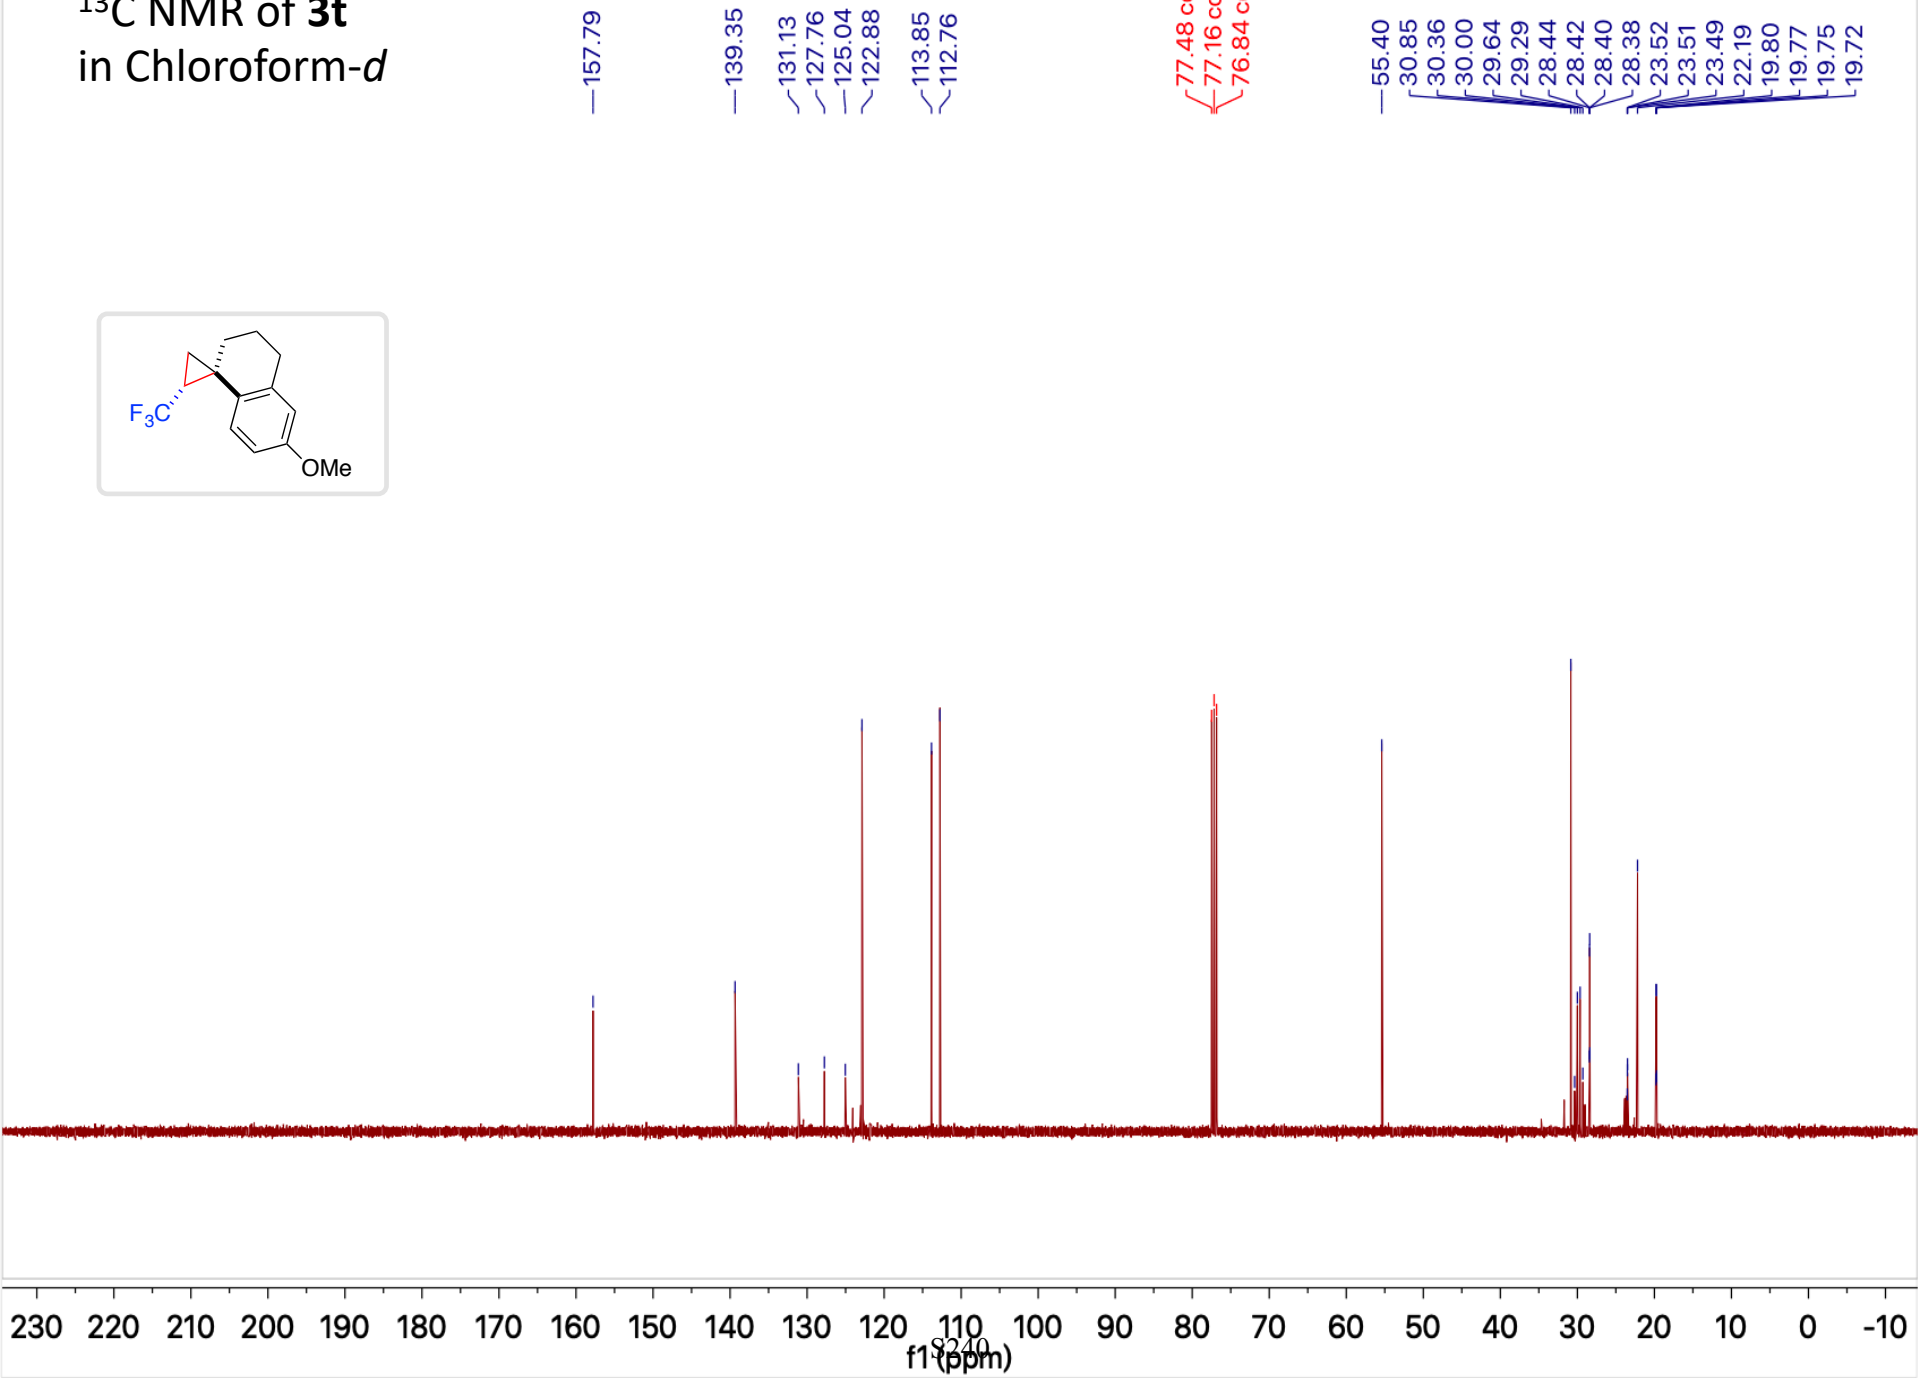

$^{19}\text{F}$  NMR of **3t**  
in Chloroform-*d*

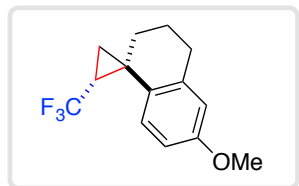

-59.16  
-59.17

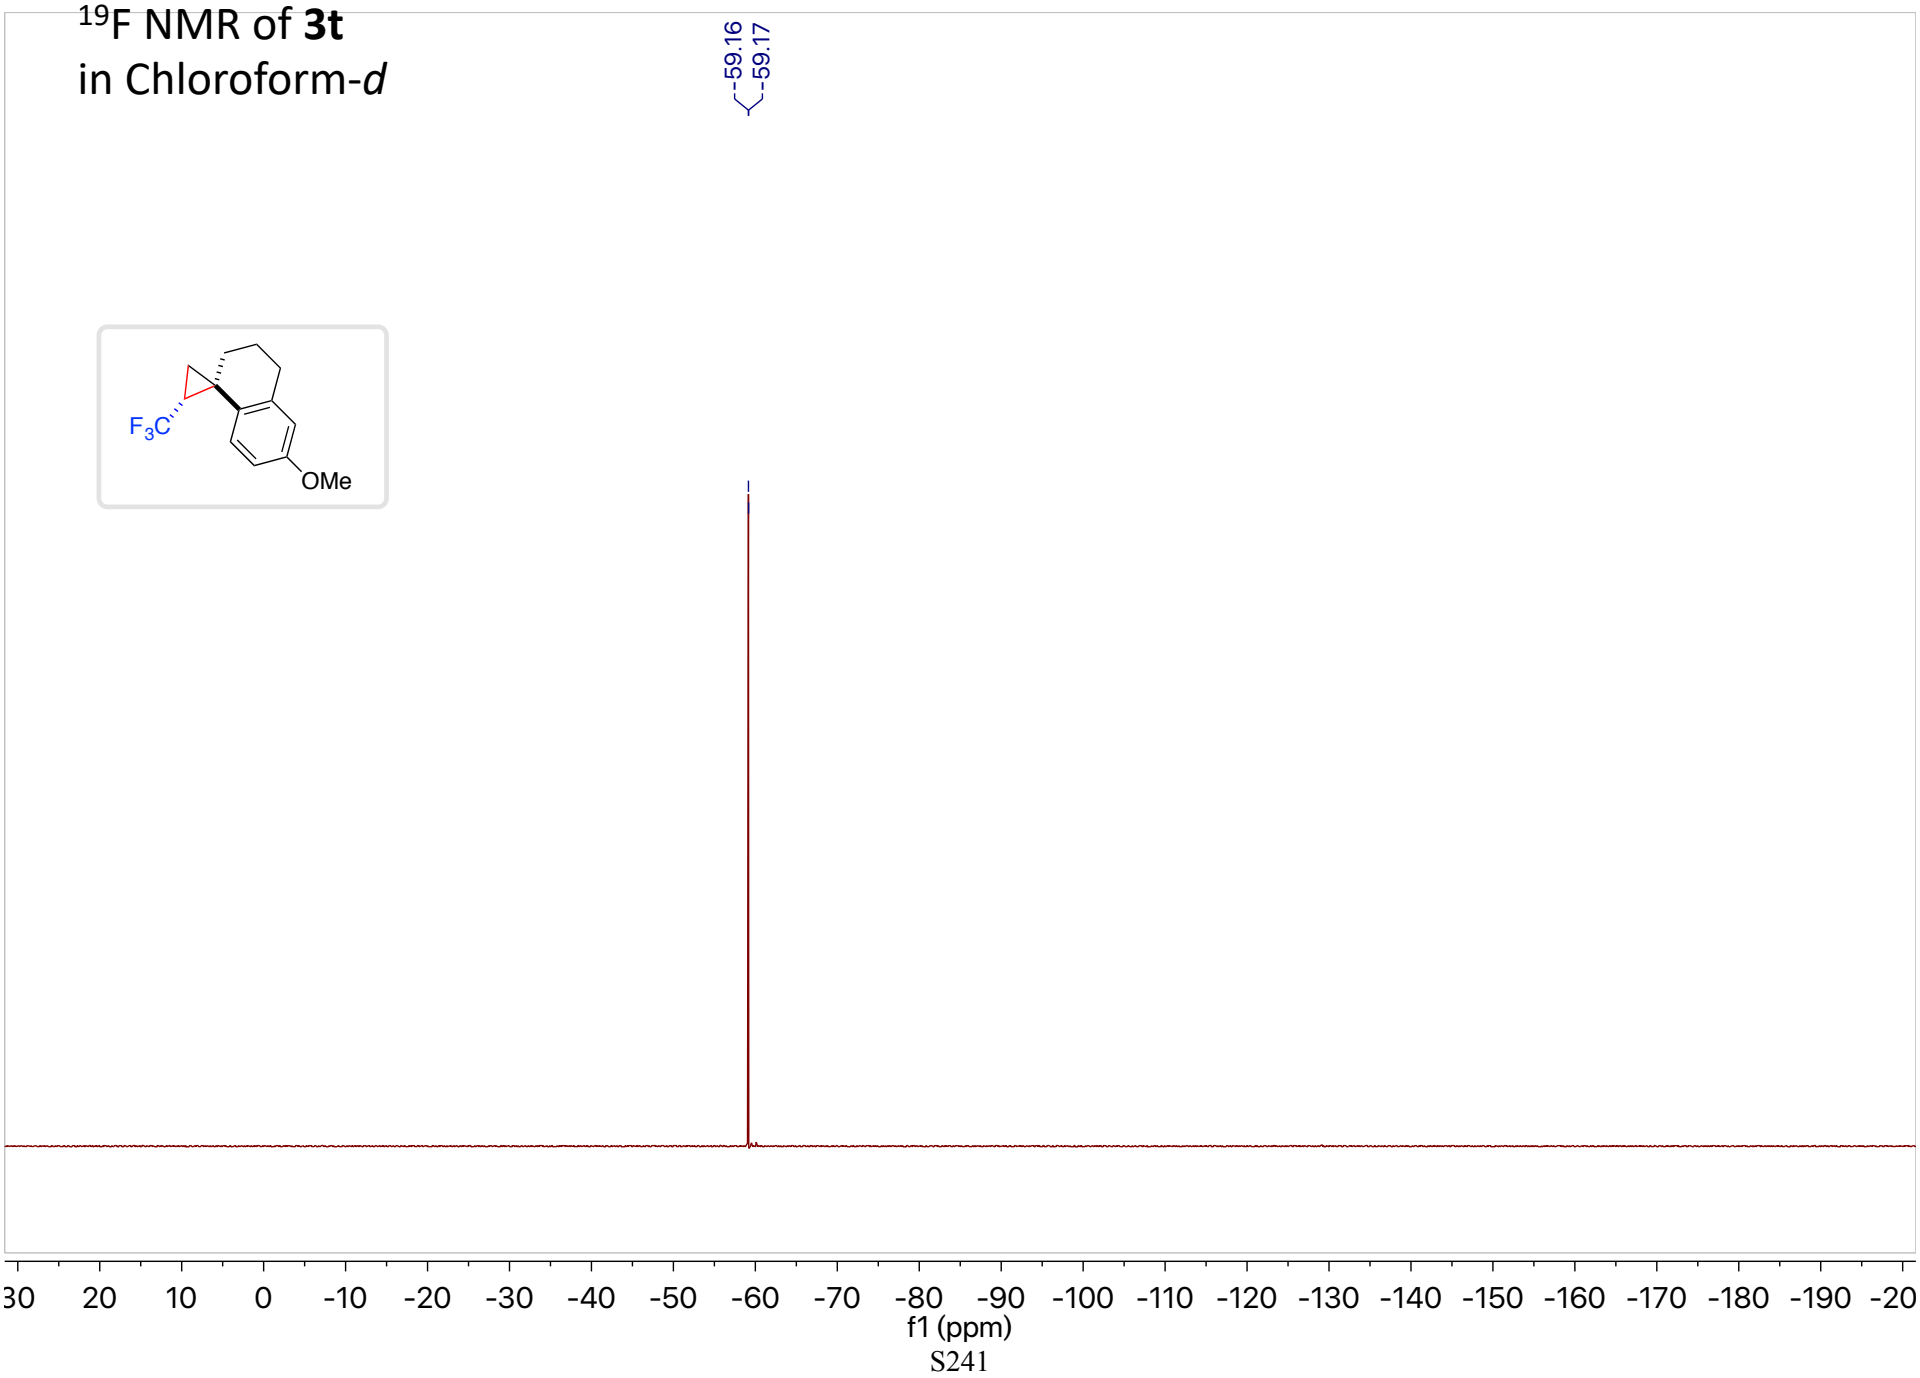

S241

# HPLC of 3t

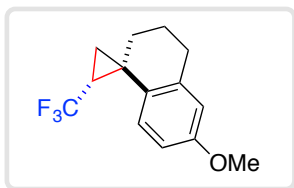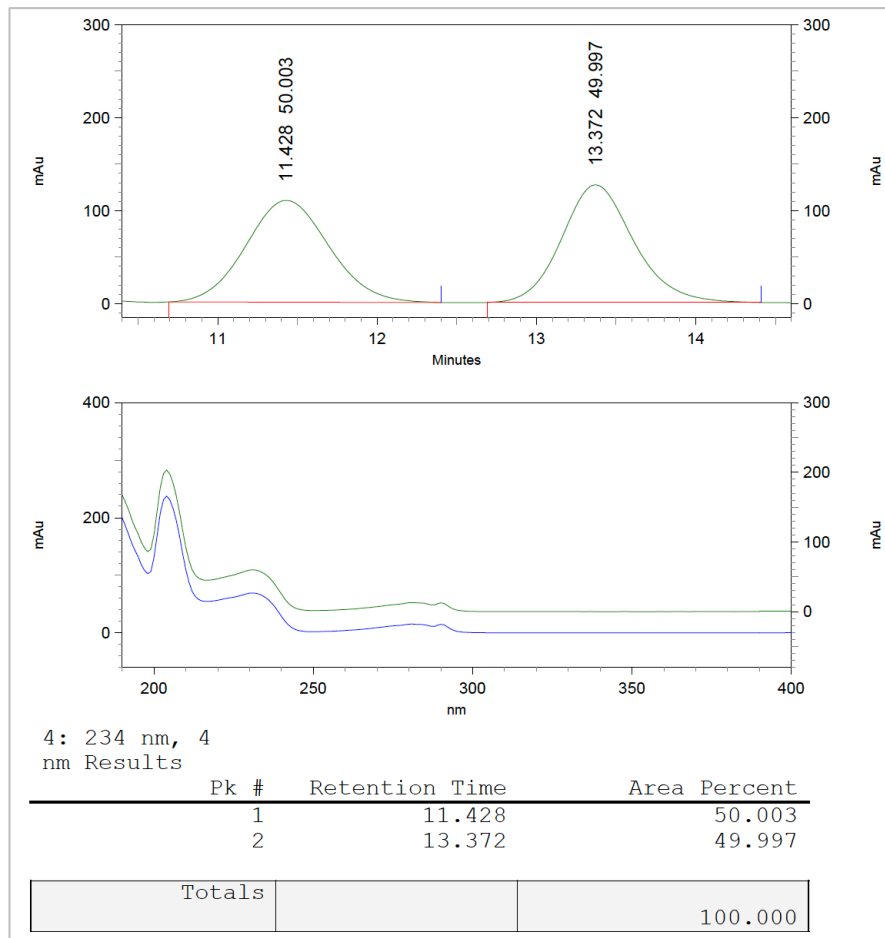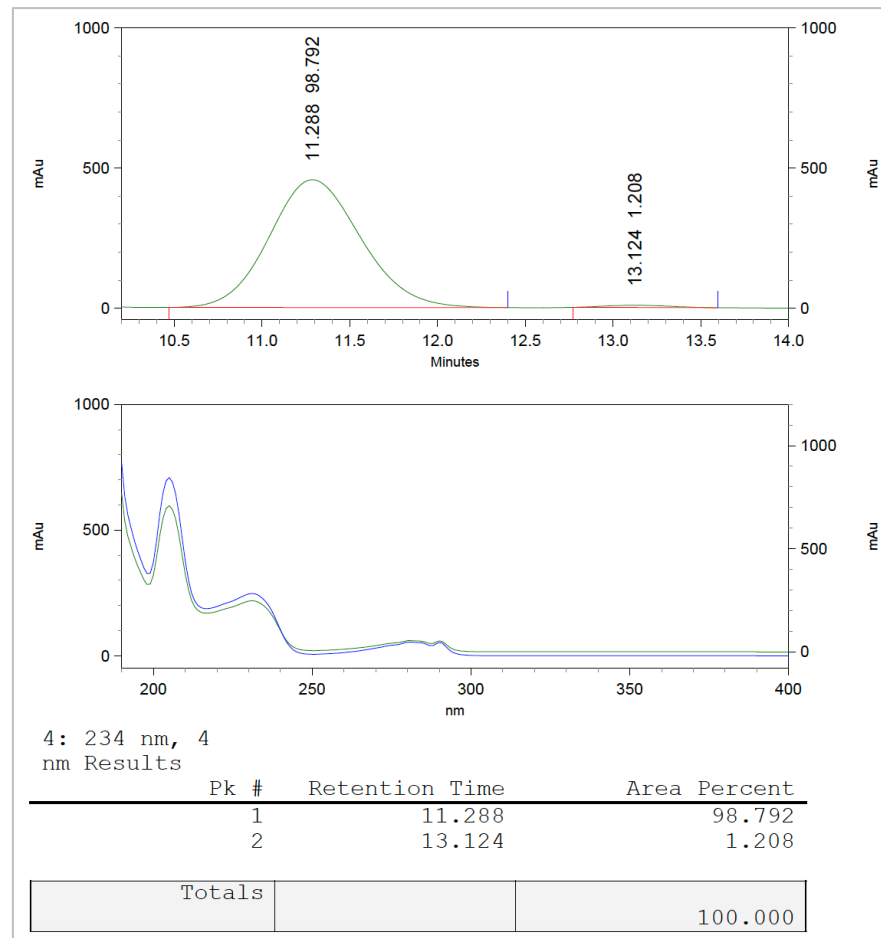

<sup>1</sup>H NMR of **3u**  
in Chloroform-*d*

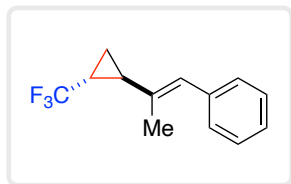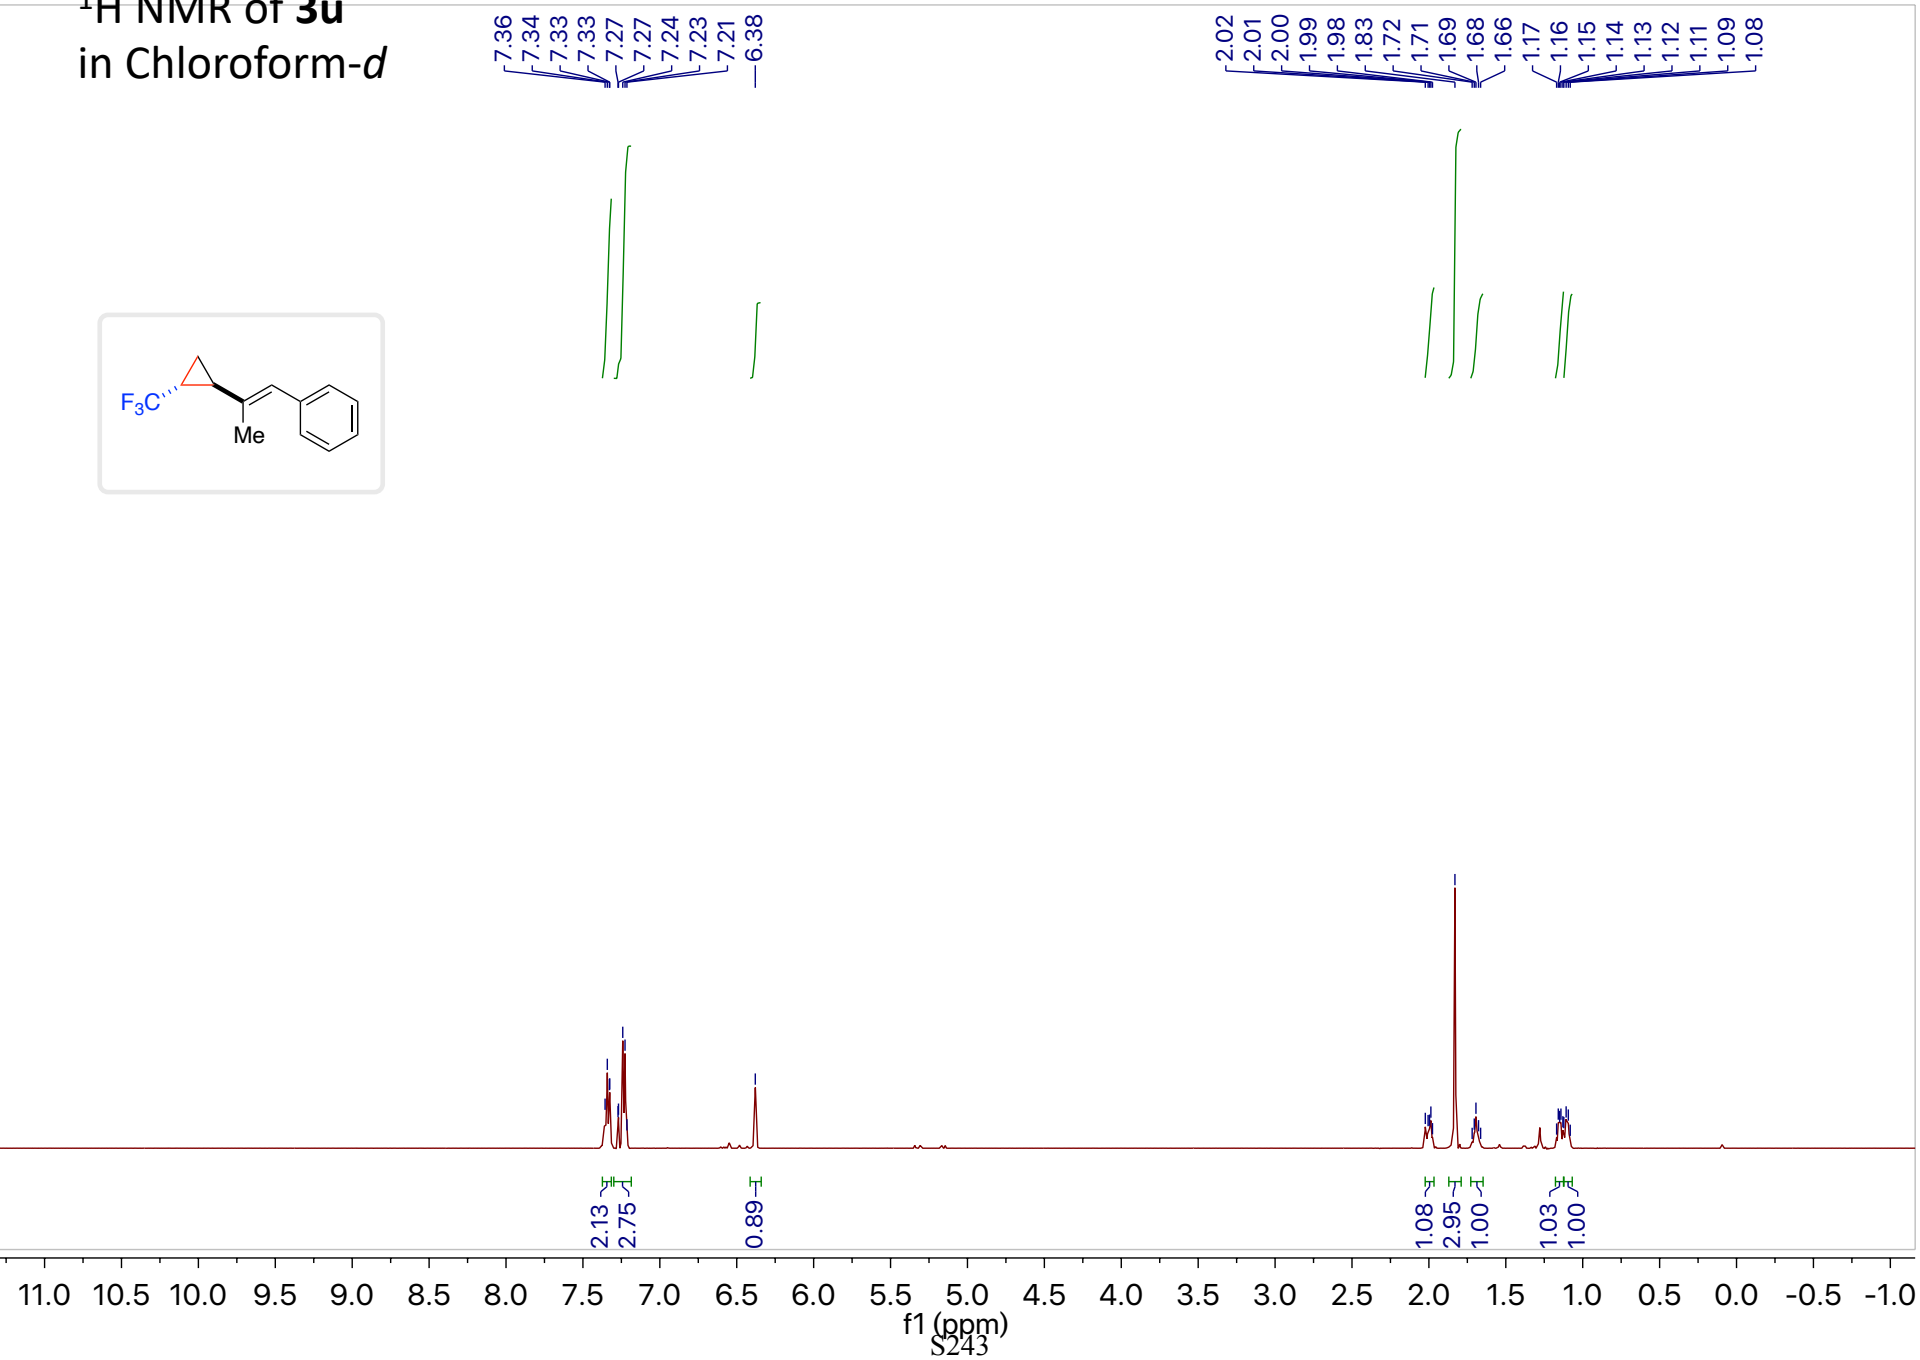

$^{13}\text{C}$  NMR of **3u**  
in Chloroform-*d*

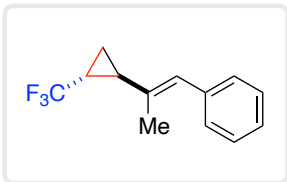

137.64  
135.06  
130.38  
128.95  
128.29  
127.69  
126.55  
126.14  
124.99

77.48 cdcl3  
77.16 cdcl3  
76.84 cdcl3

24.01  
23.98  
23.96  
23.93  
20.74  
20.38  
20.01  
19.65  
16.29  
8.22  
8.20  
8.18  
8.15

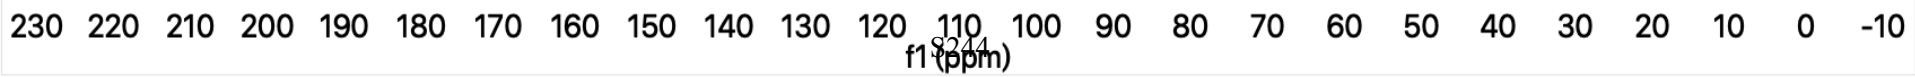

<sup>19</sup>F NMR of **3u**  
in Chloroform-*d*

66.47  
66.49

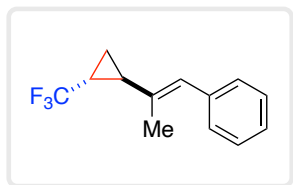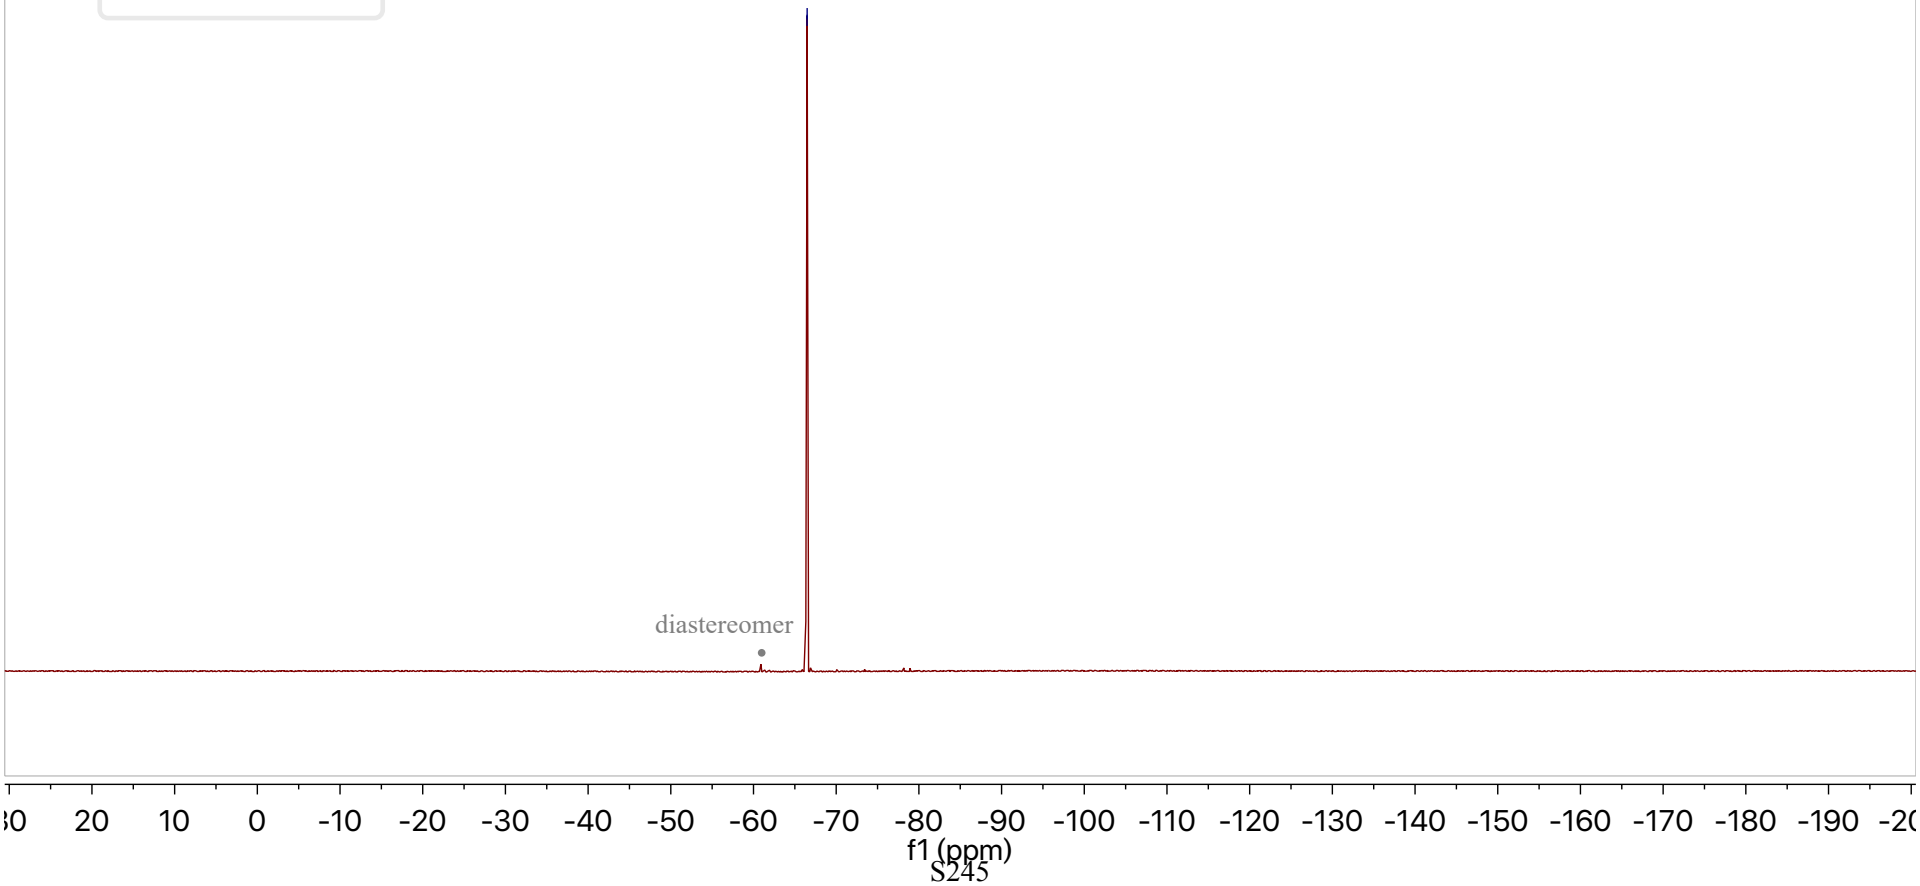

# HPLC of 3u

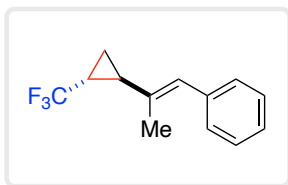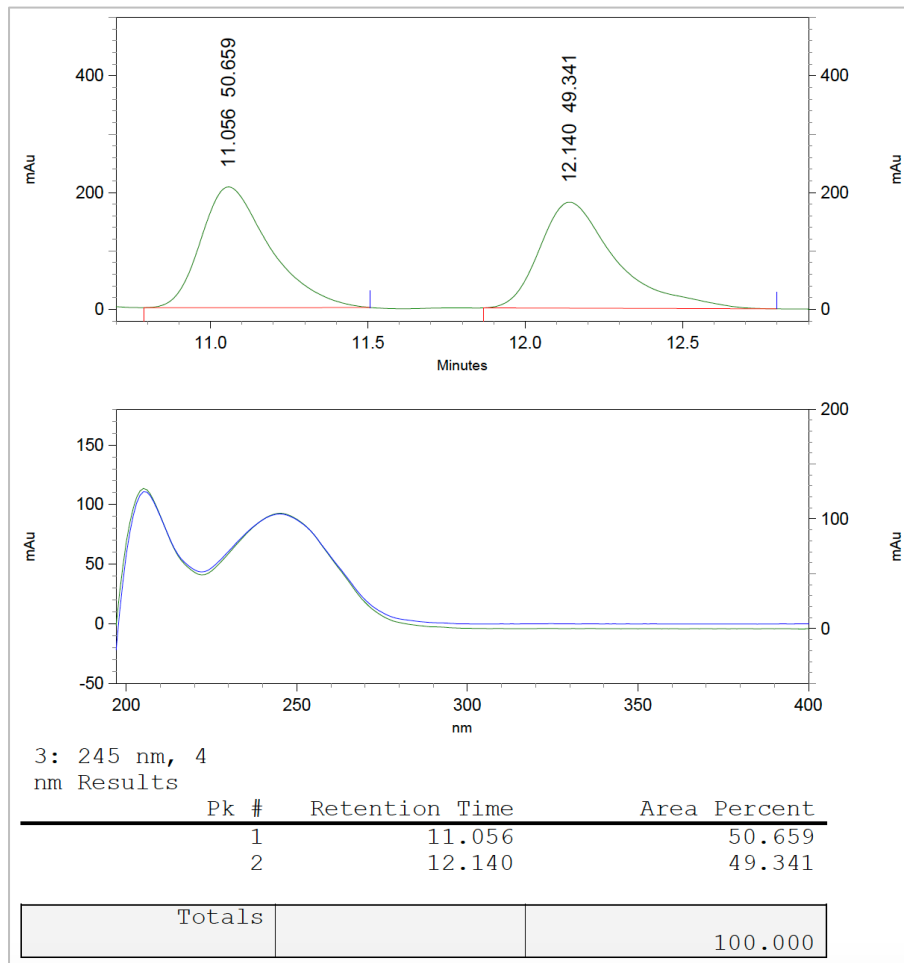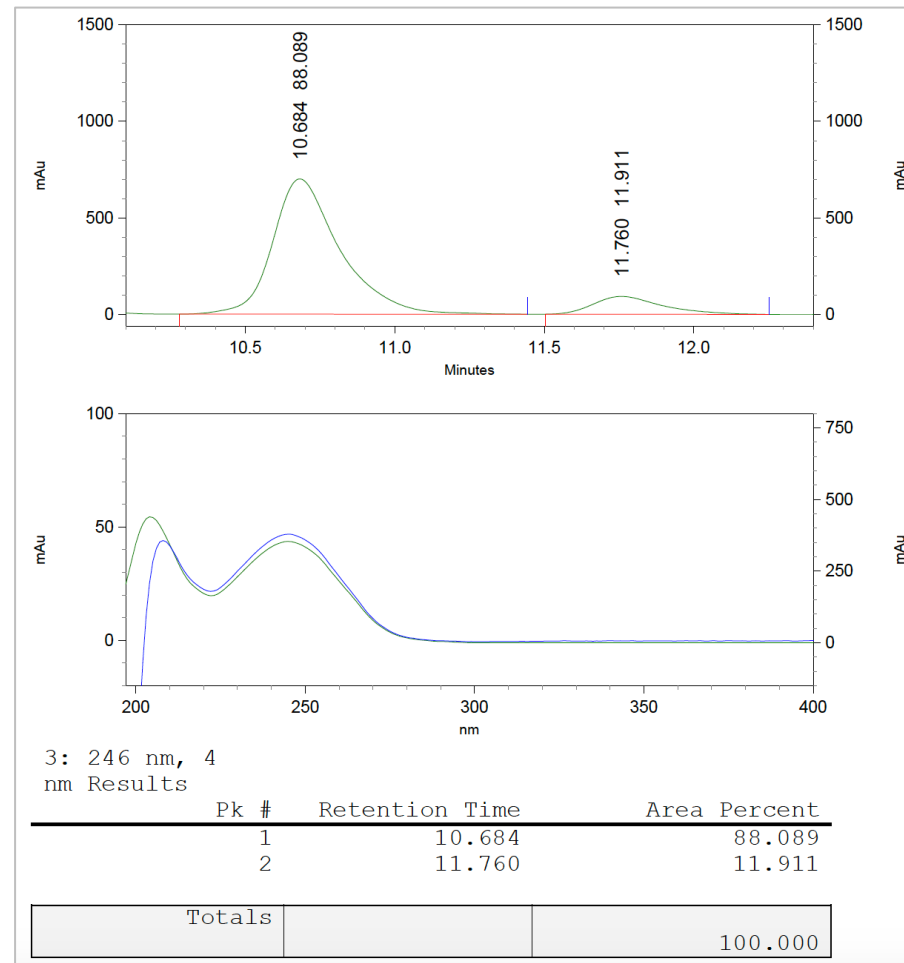

<sup>1</sup>H NMR of **3v**  
in Chloroform-*d*

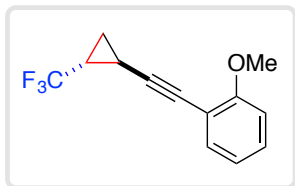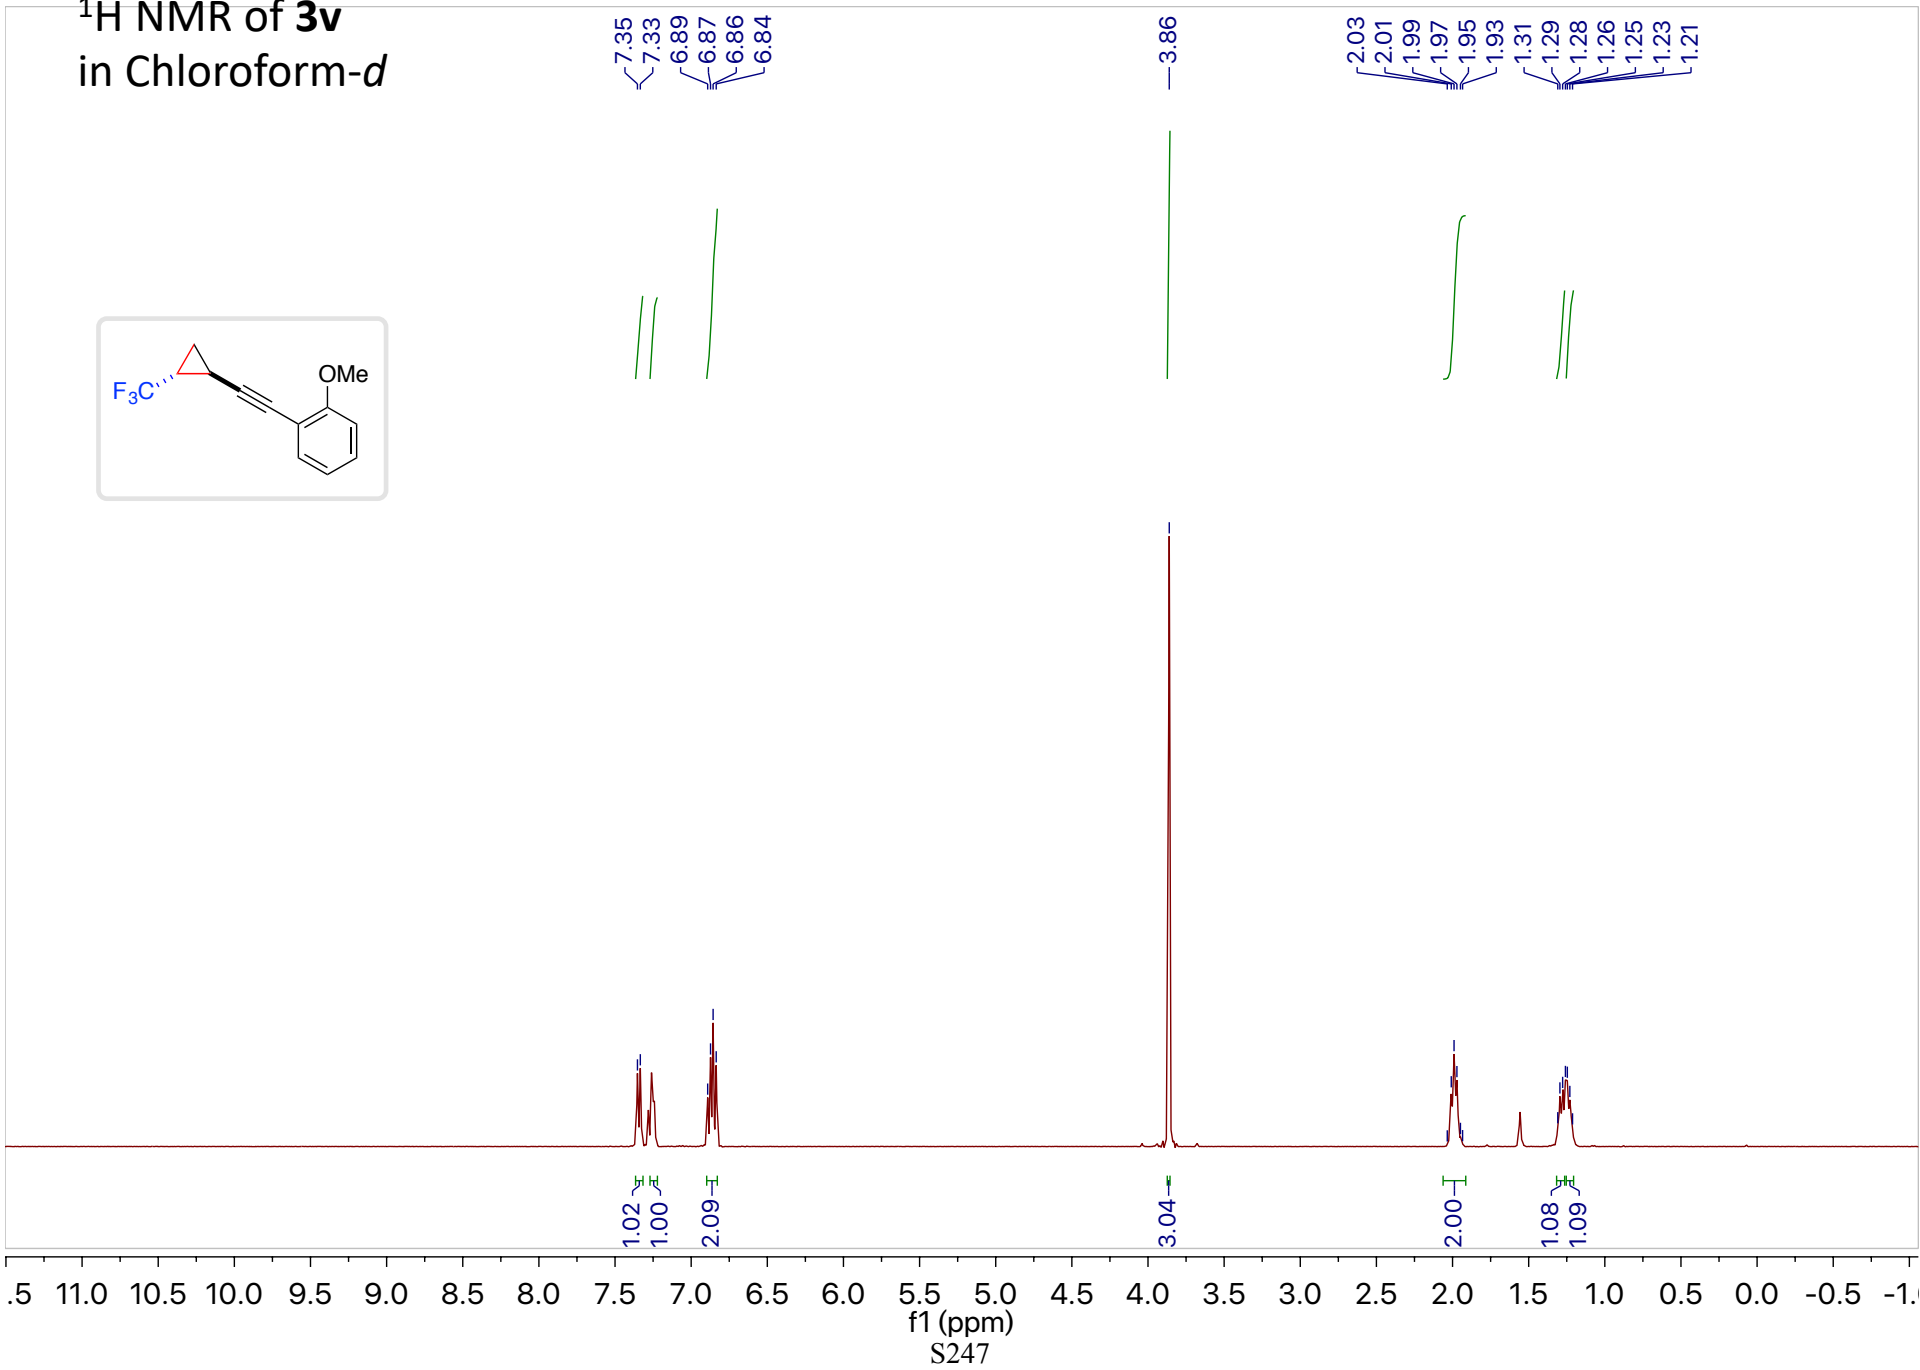



$^{13}\text{C}$  NMR of **3v**  
in Chloroform-*d*

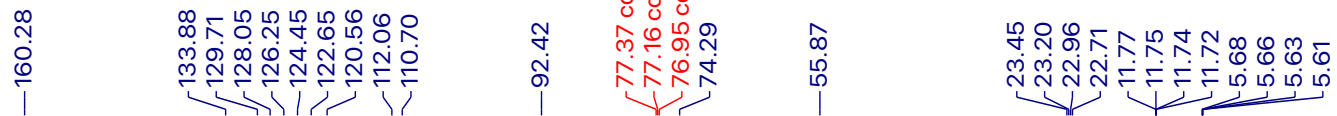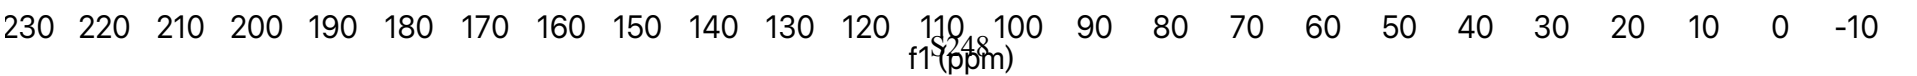

$^{19}\text{F}$  NMR of **3v**  
in Chloroform-*d*

-67.31  
-67.33

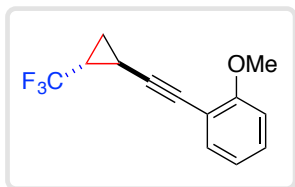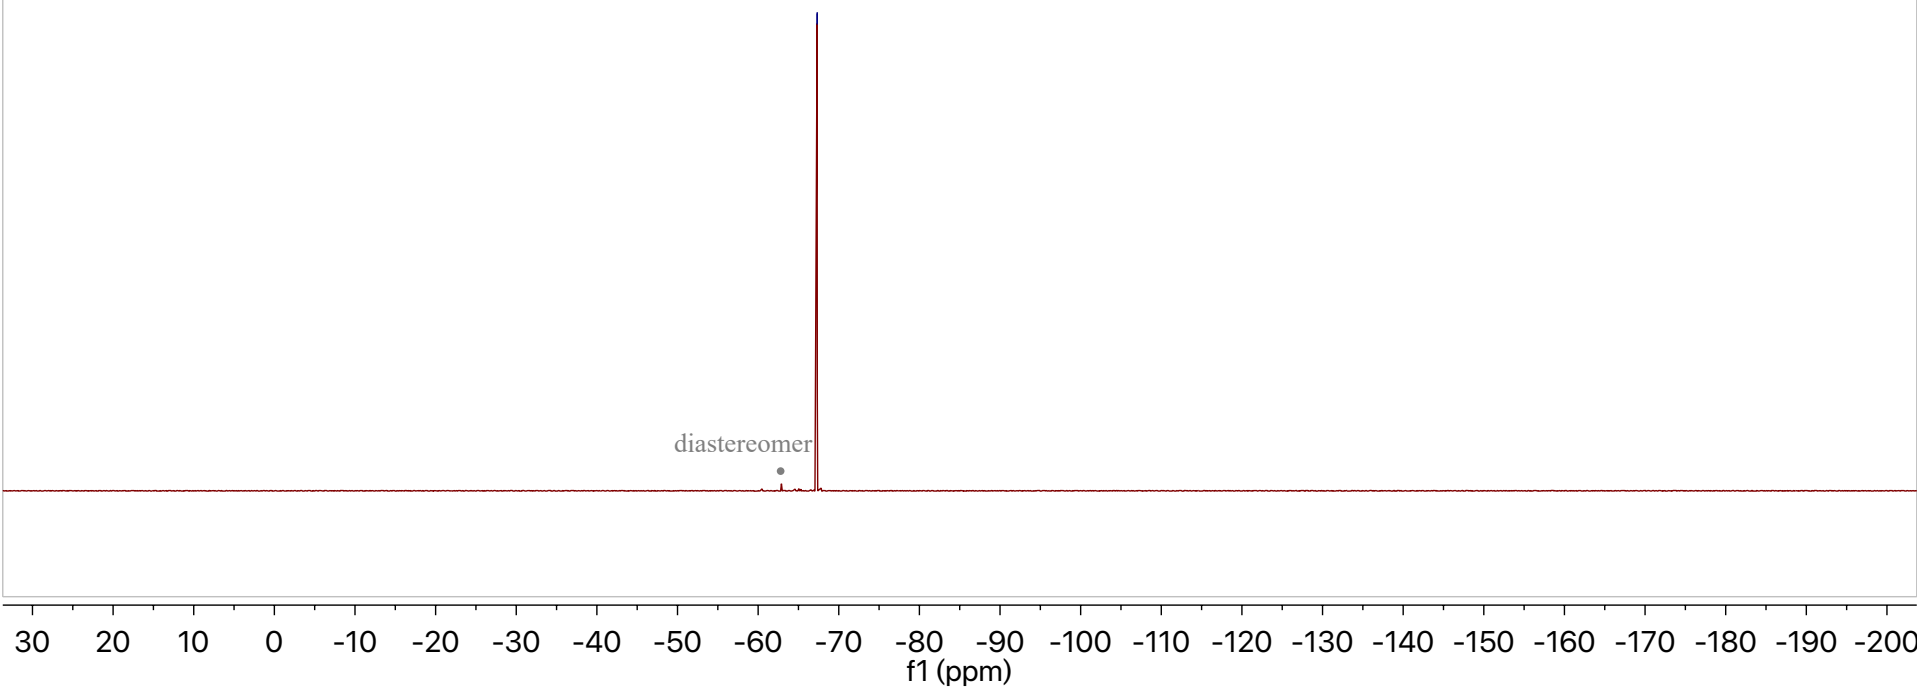

# HPLC of 3v

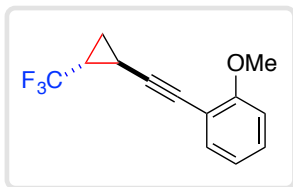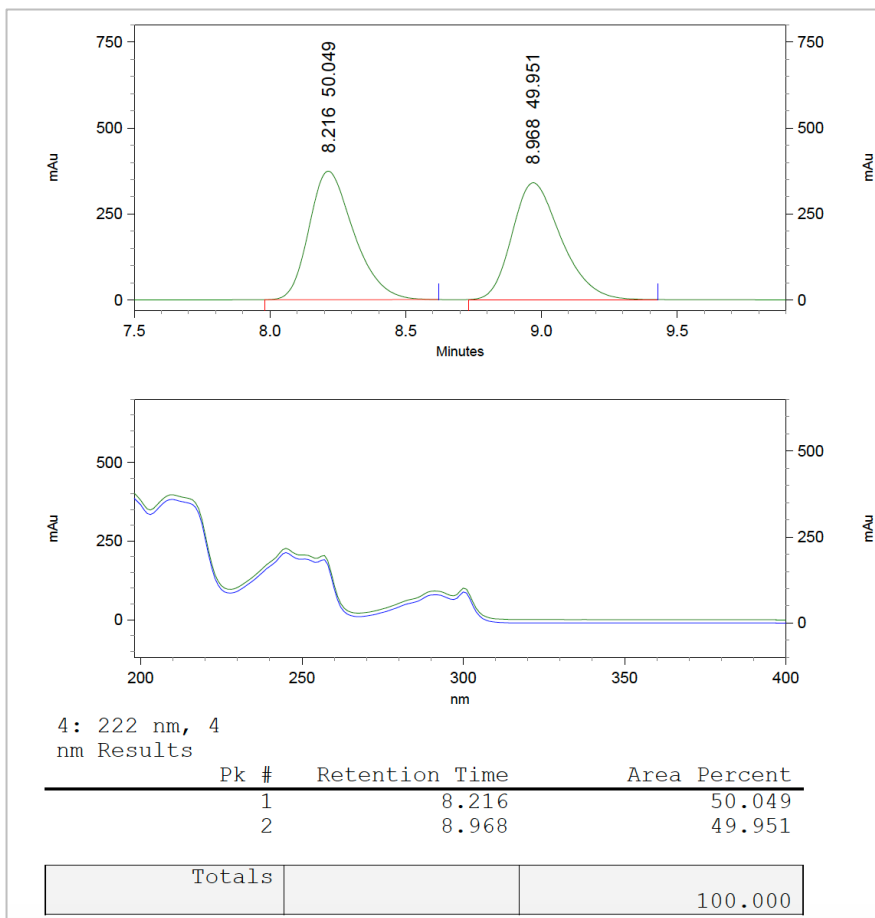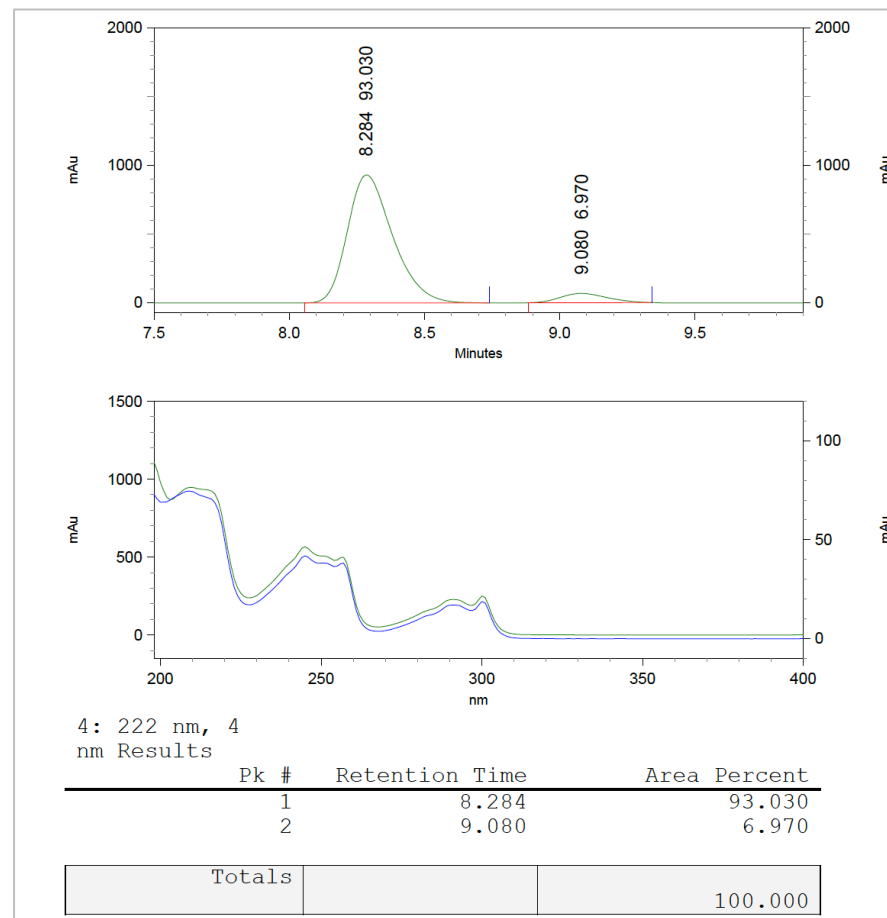

<sup>1</sup>H NMR of **3w**  
in Chloroform-*d*

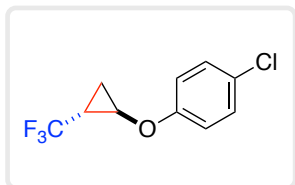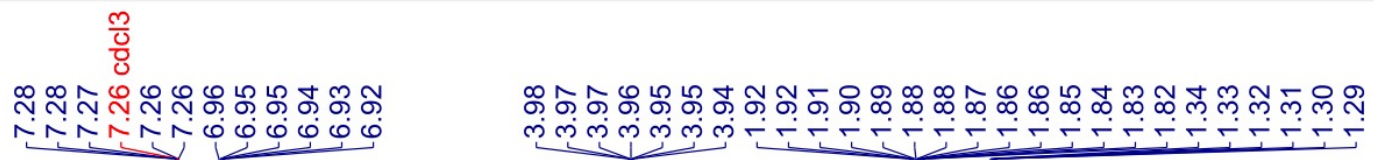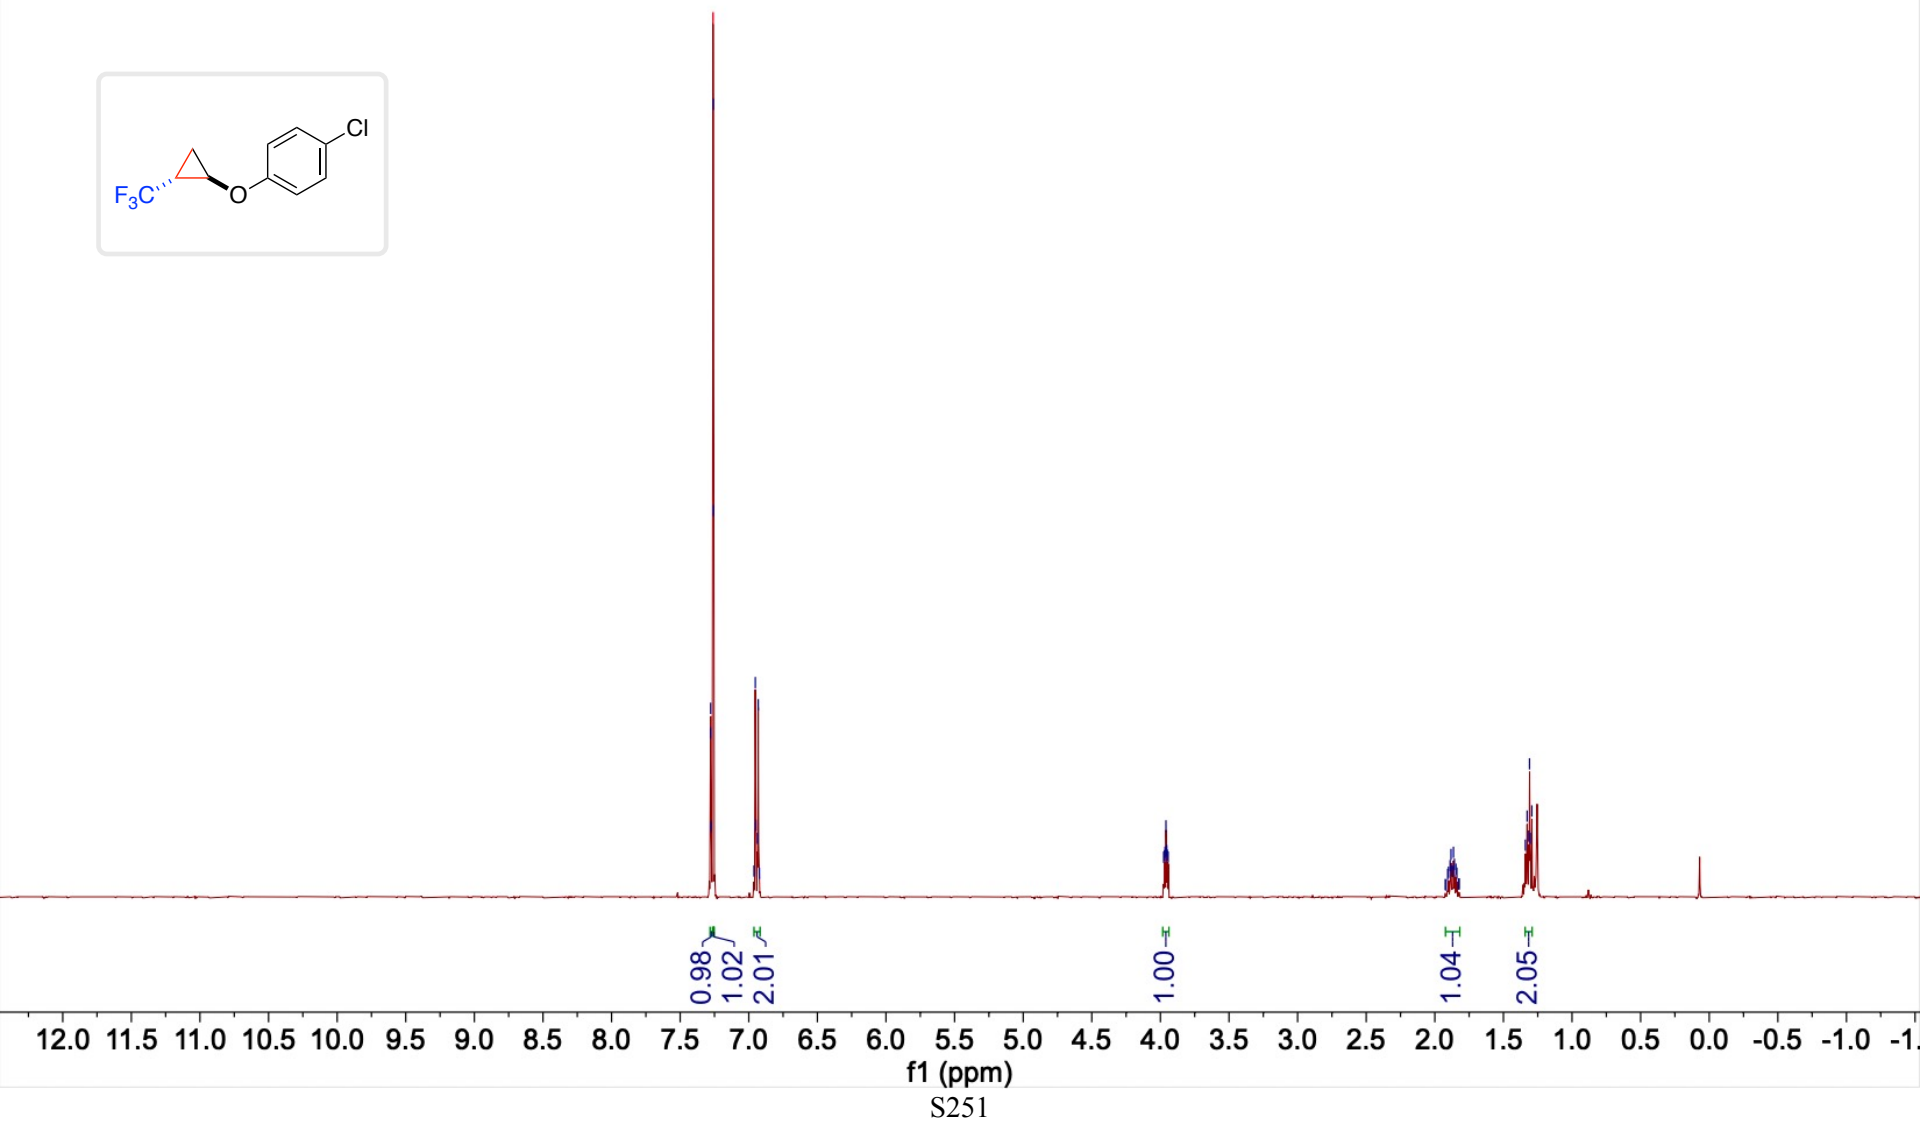

$^{13}\text{C}$  NMR of **3w**  
in Chloroform-*d*

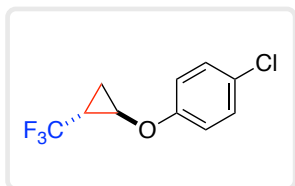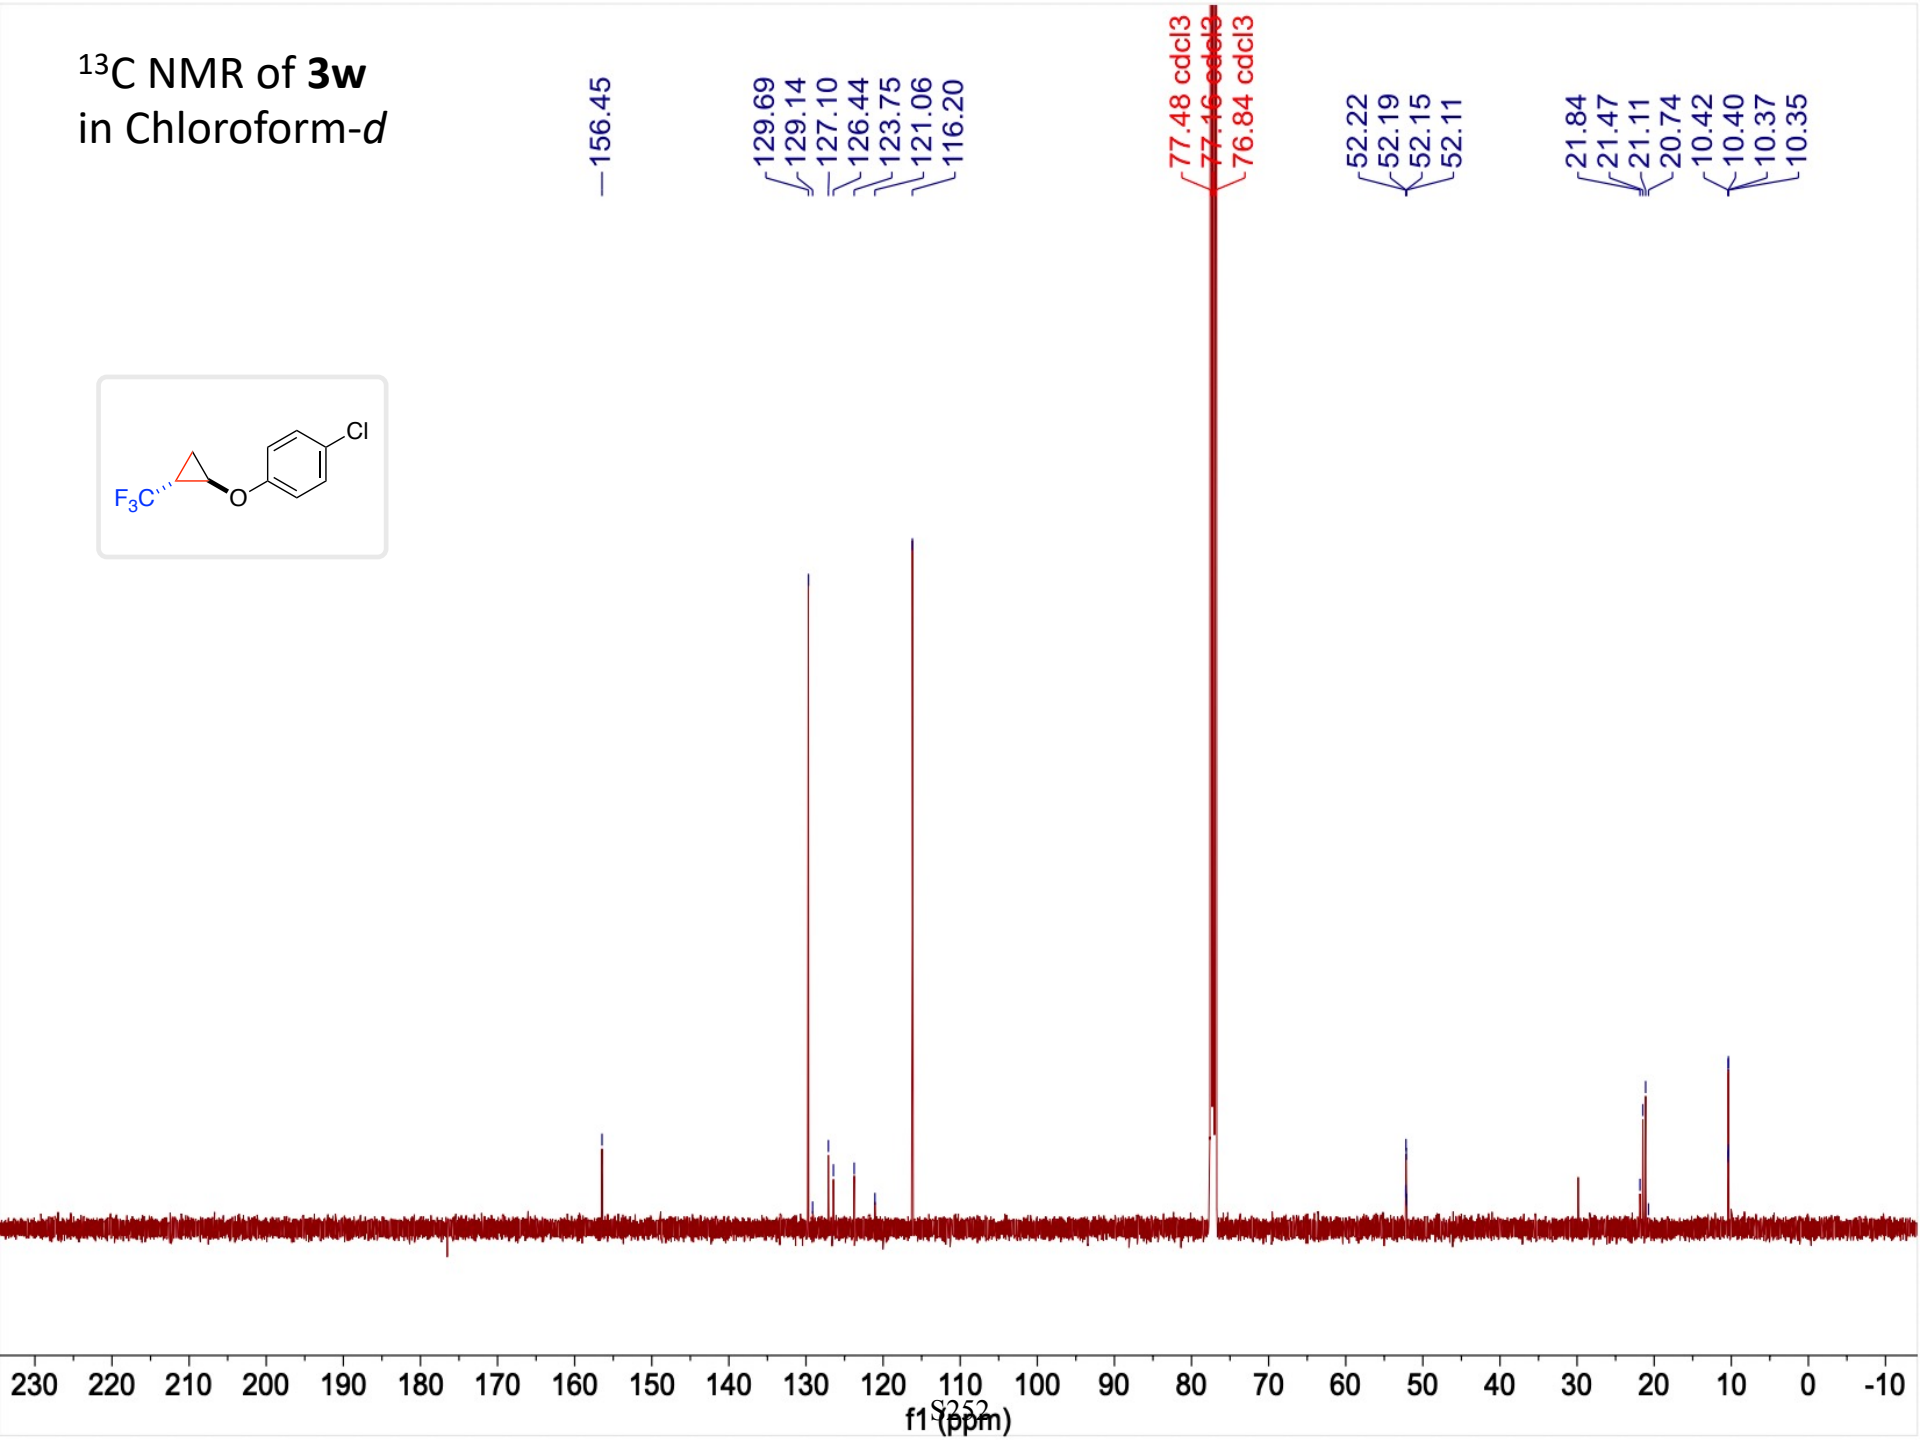

$^{19}\text{F}$  NMR of **3w**  
in Chloroform-*d*



{  
-65.50  
-65.52  
}

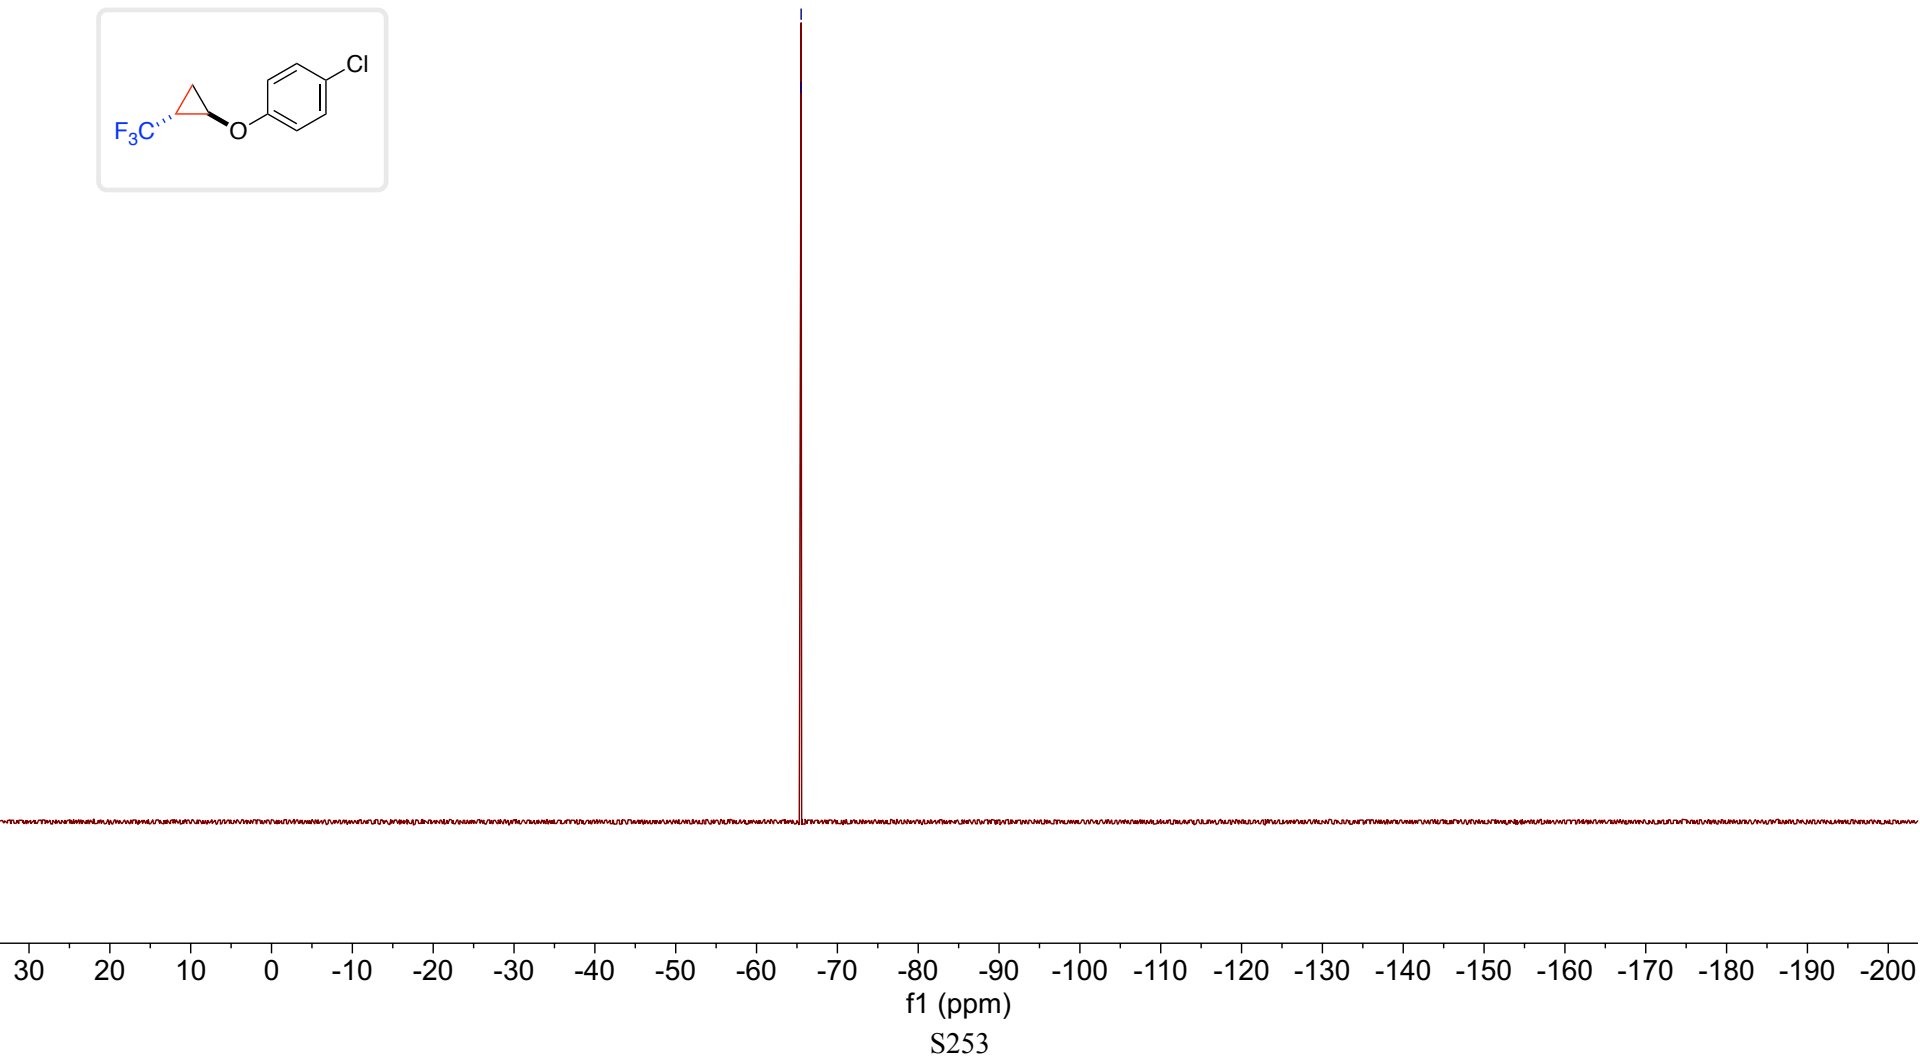

# HPLC of 3w

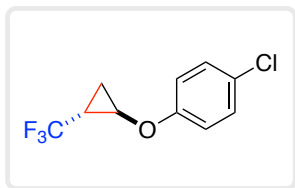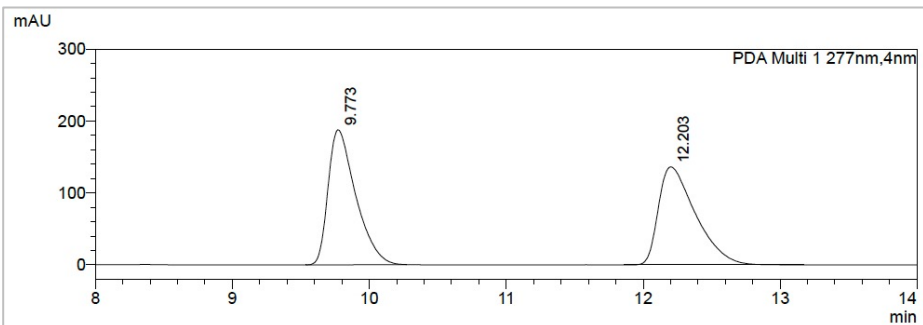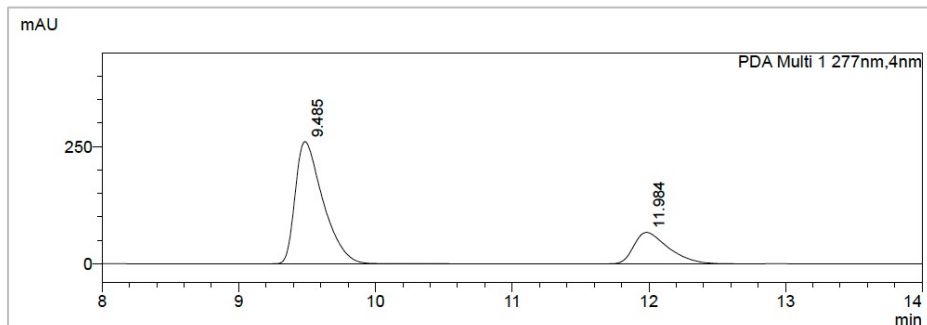

WCL-1433-1-ODH-1%0.8mL\_001.lcd

WCL-1434-ODH-1%0.8mL\_002.lcd

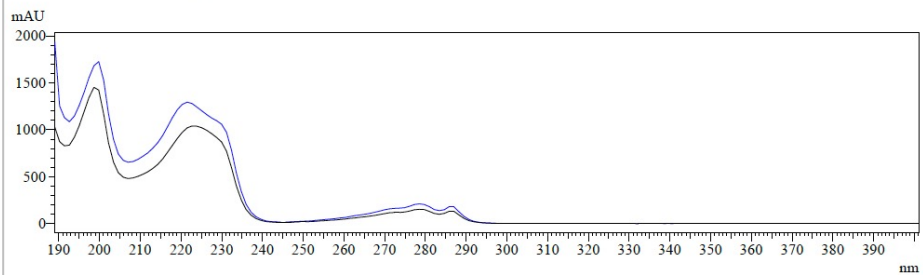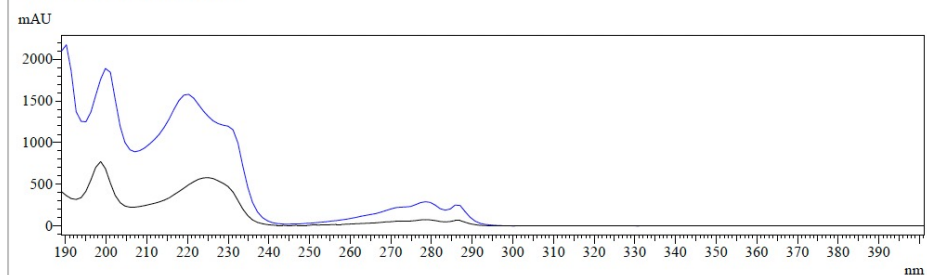

Peak Table

PDA Ch1 277nm

| Peak# | Ret. Time | Area%   |
|-------|-----------|---------|
| 1     | 9.773     | 50.574  |
| 2     | 12.203    | 49.426  |
| Total |           | 100.000 |

Peak Table

PDA Ch1 277nm

| Peak# | Ret. Time | Area%   |
|-------|-----------|---------|
| 1     | 9.485     | 75.784  |
| 2     | 11.984    | 24.216  |
| Total |           | 100.000 |

$^1\text{H}$  NMR of **3x**  
in Chloroform-*d*

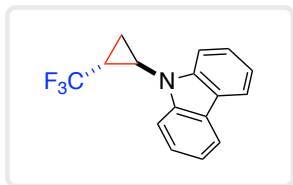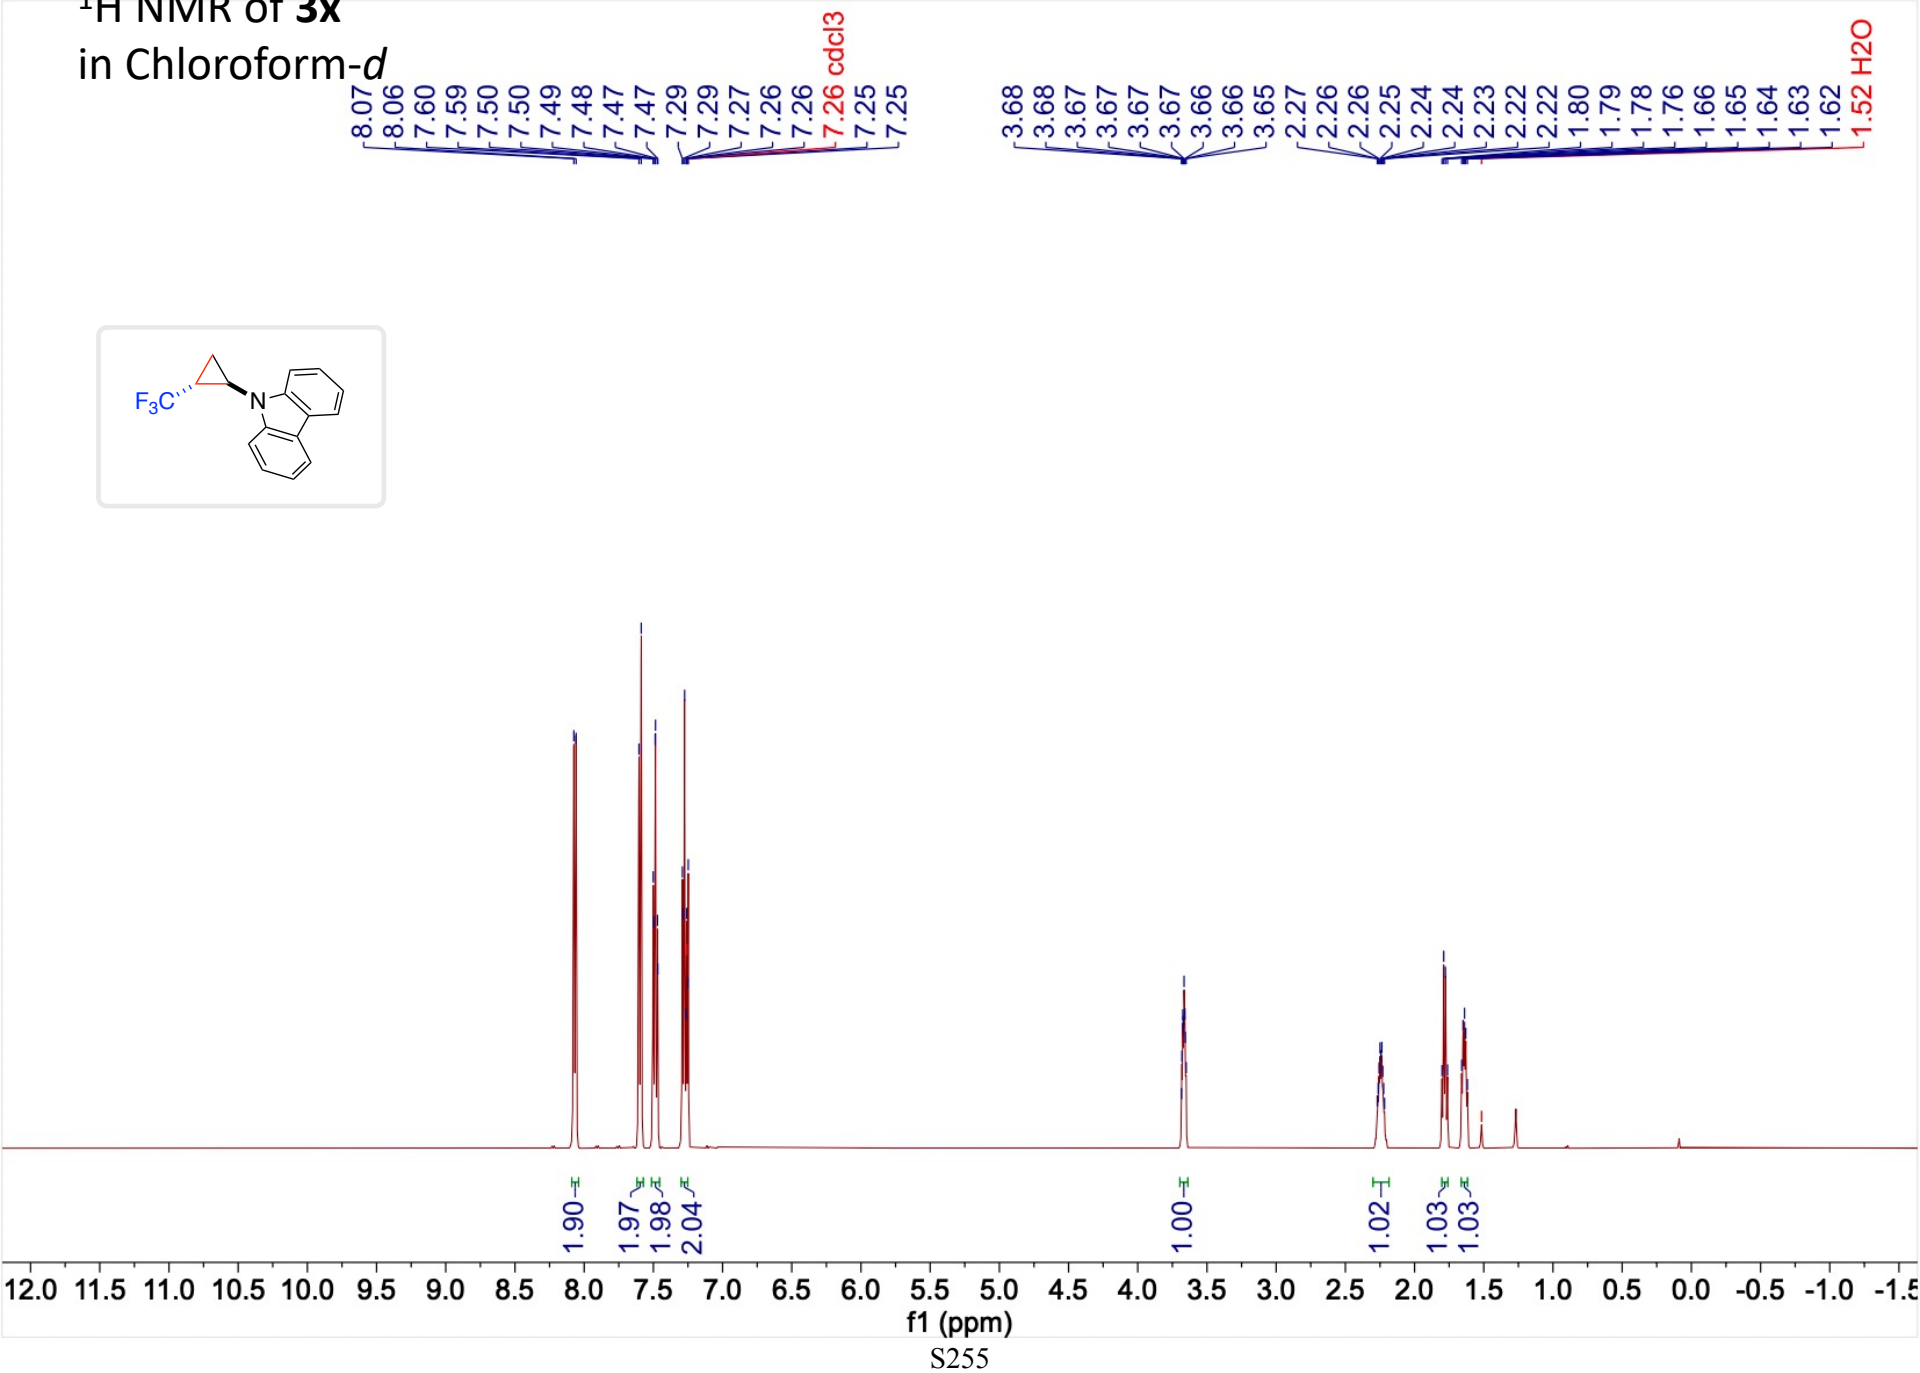



$^{13}\text{C}$  NMR of **3x**  
in Chloroform-*d*

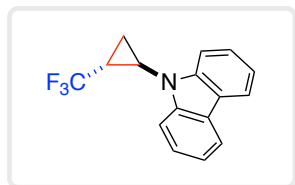

140.80  
129.49  
126.79  
126.22  
124.09  
123.41  
121.39  
120.57  
120.05  
— 109.69

77.48 cdcl3  
77.16 cdcl3  
76.84 cdcl3

27.48  
27.44  
27.40  
22.66  
22.30  
21.94  
21.57  
11.22  
11.20  
11.17  
11.15

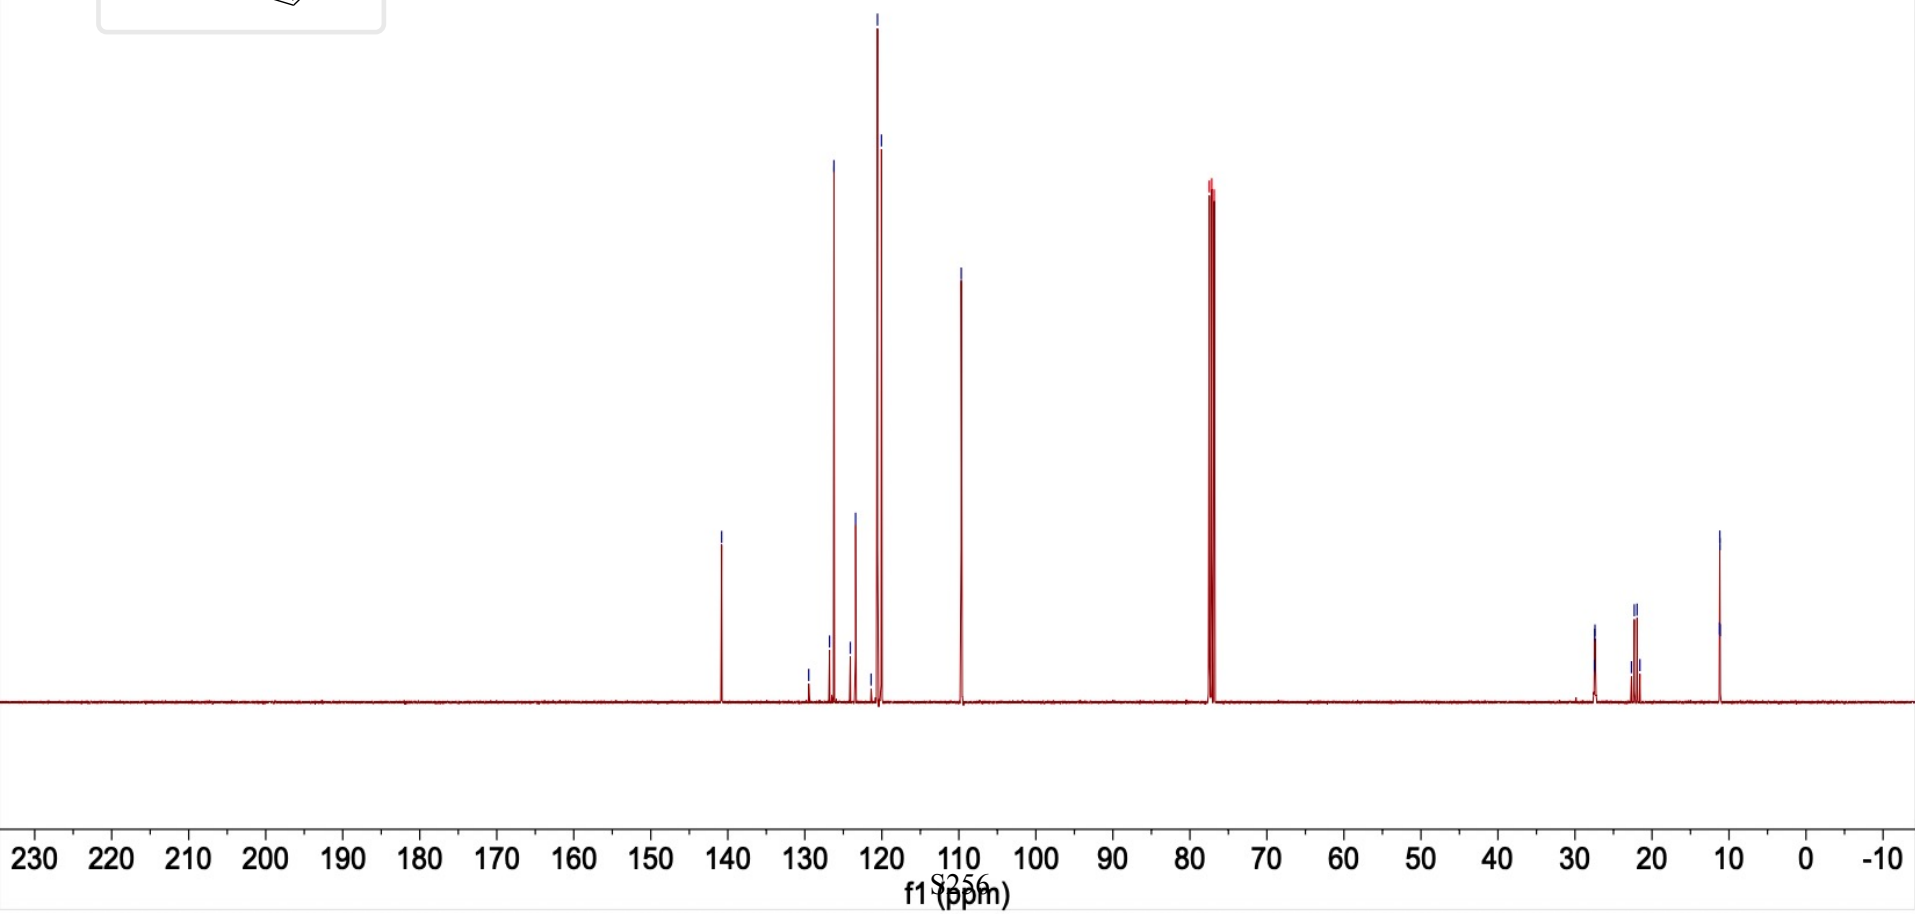

$^{19}\text{F}$  NMR of **3x**  
in Chloroform-*d*

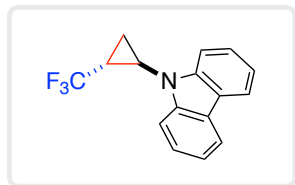

-65.74  
-65.76

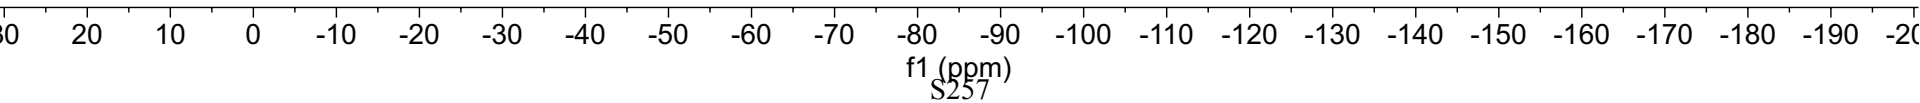

# HPLC of 3x

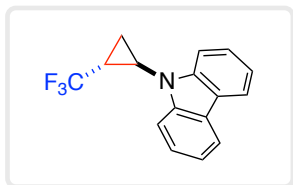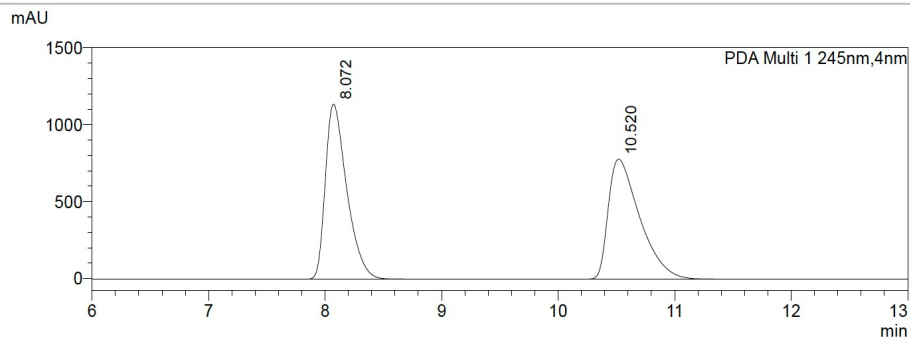

WCL-1413-ODH-5%0.8mL\_001.lcd

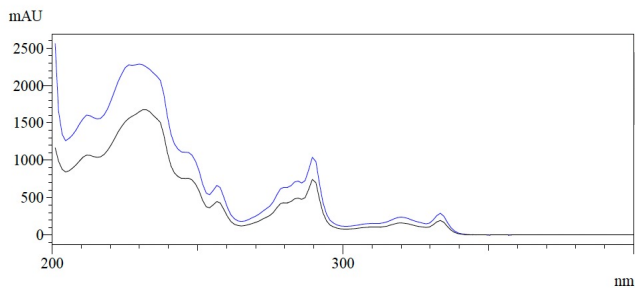

| Peak Table |           |         |
|------------|-----------|---------|
| Peak#      | Ret. Time | Area%   |
| 1          | 8.072     | 49.860  |
| 2          | 10.520    | 50.140  |
| Total      |           | 100.000 |

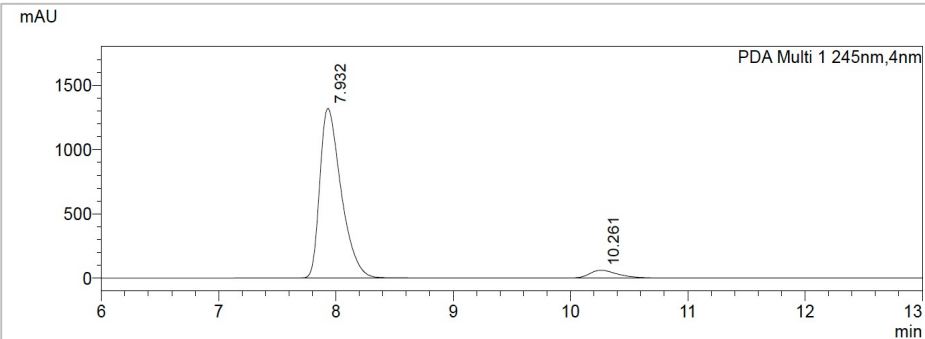

WCL-1414-ODH-5%0.8mL\_002.lcd

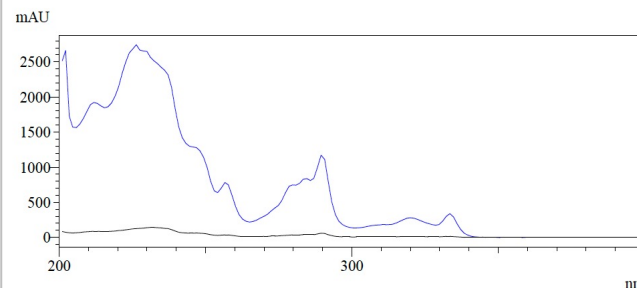

| Peak Table |           |         |
|------------|-----------|---------|
| Peak#      | Ret. Time | Area%   |
| 1          | 7.932     | 94.446  |
| 2          | 10.261    | 5.554   |
| Total      |           | 100.000 |

<sup>1</sup>H NMR of **3y**  
in Chloroform-*d*

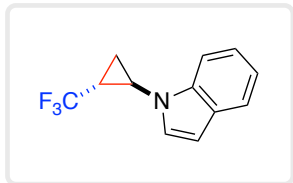

7.63  
7.61  
7.56  
7.54  
7.30  
7.28  
7.26 cdc13  
7.26  
7.18  
7.17  
7.15  
7.07  
7.06  
6.50  
6.49

3.74  
3.74  
3.73  
3.73  
3.72  
3.71  
3.70  
2.17  
2.16  
2.16  
2.15  
2.14  
2.13  
2.12  
2.12  
2.11  
2.11  
2.10  
2.09  
2.08  
2.07  
1.62  
1.61  
1.60  
1.59  
1.54 H2O

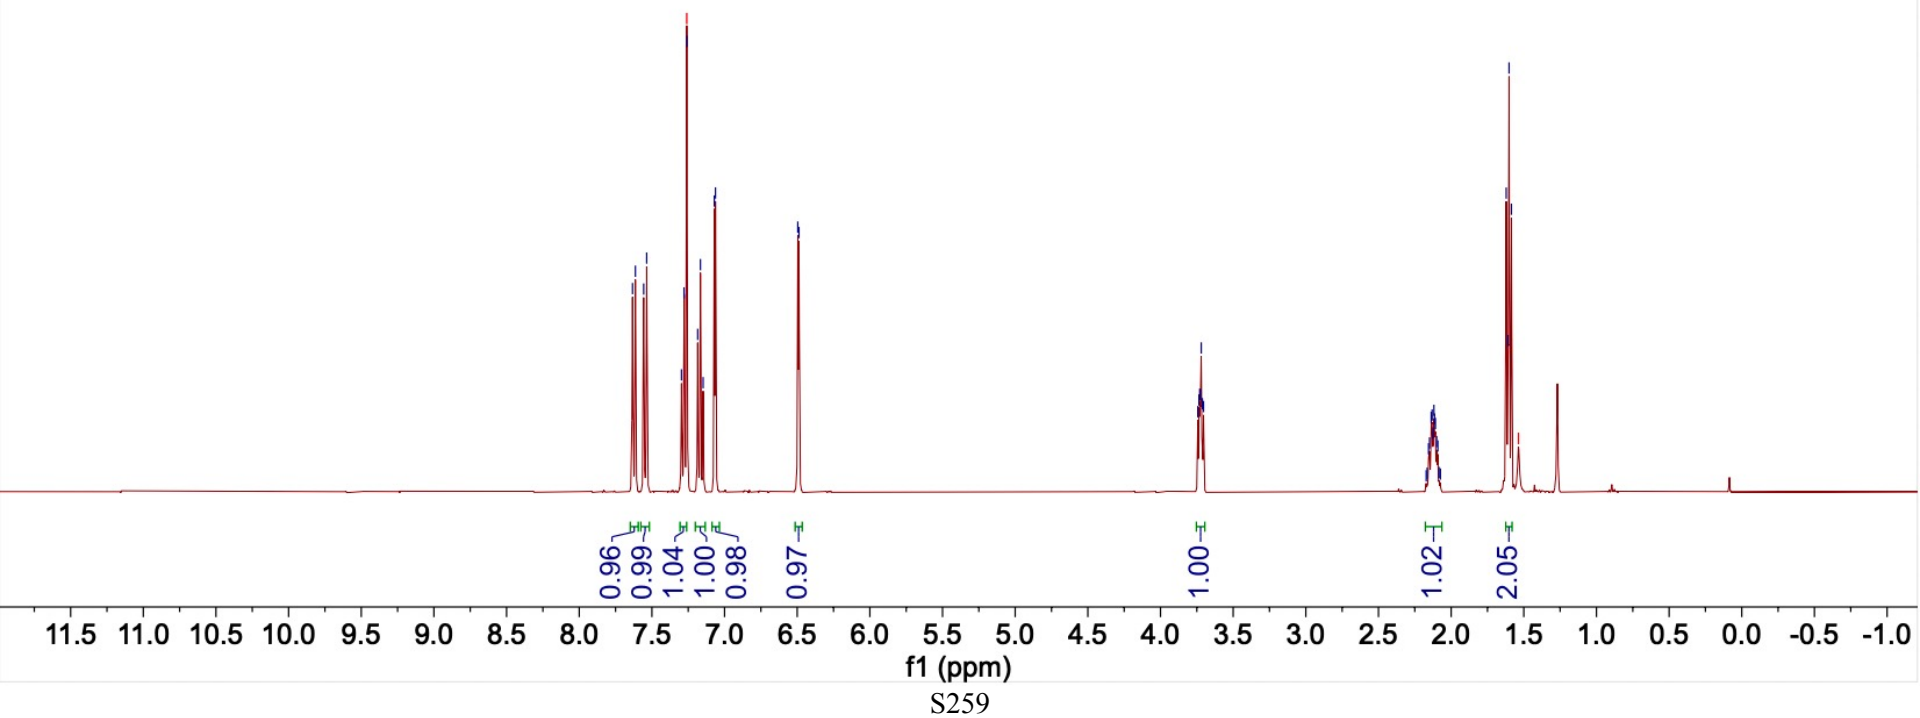

$^{13}\text{C}$  NMR of **3y**  
in Chloroform-*d*

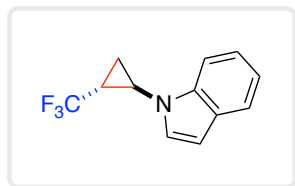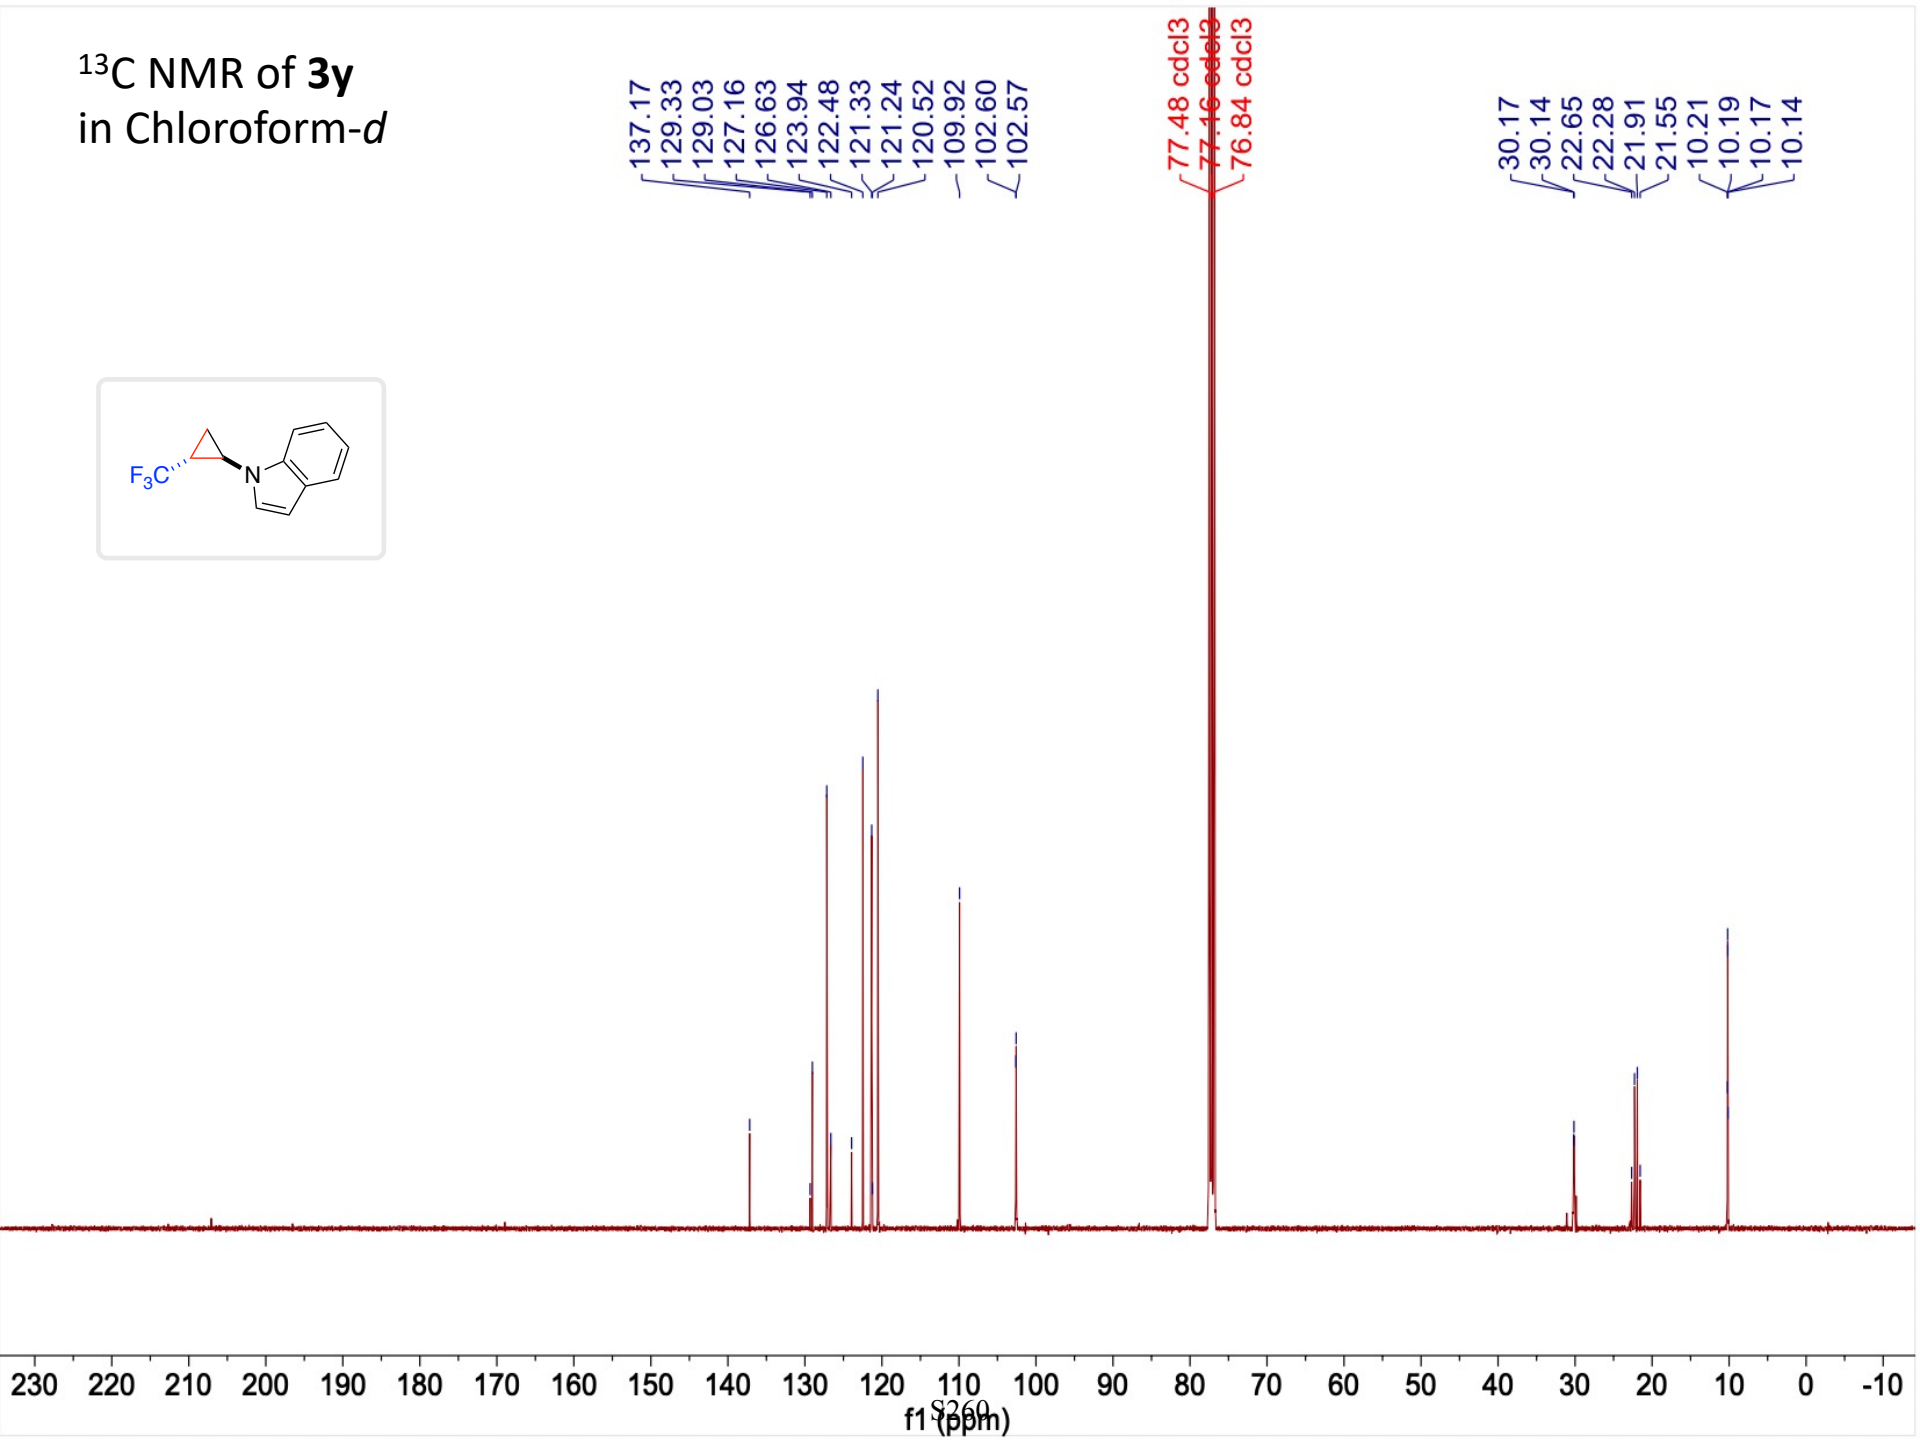

$^{19}\text{F}$  NMR of **3y**  
in Chloroform-*d*

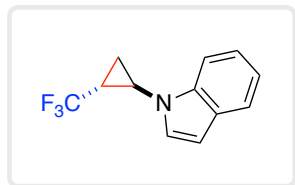

66.00  
66.01

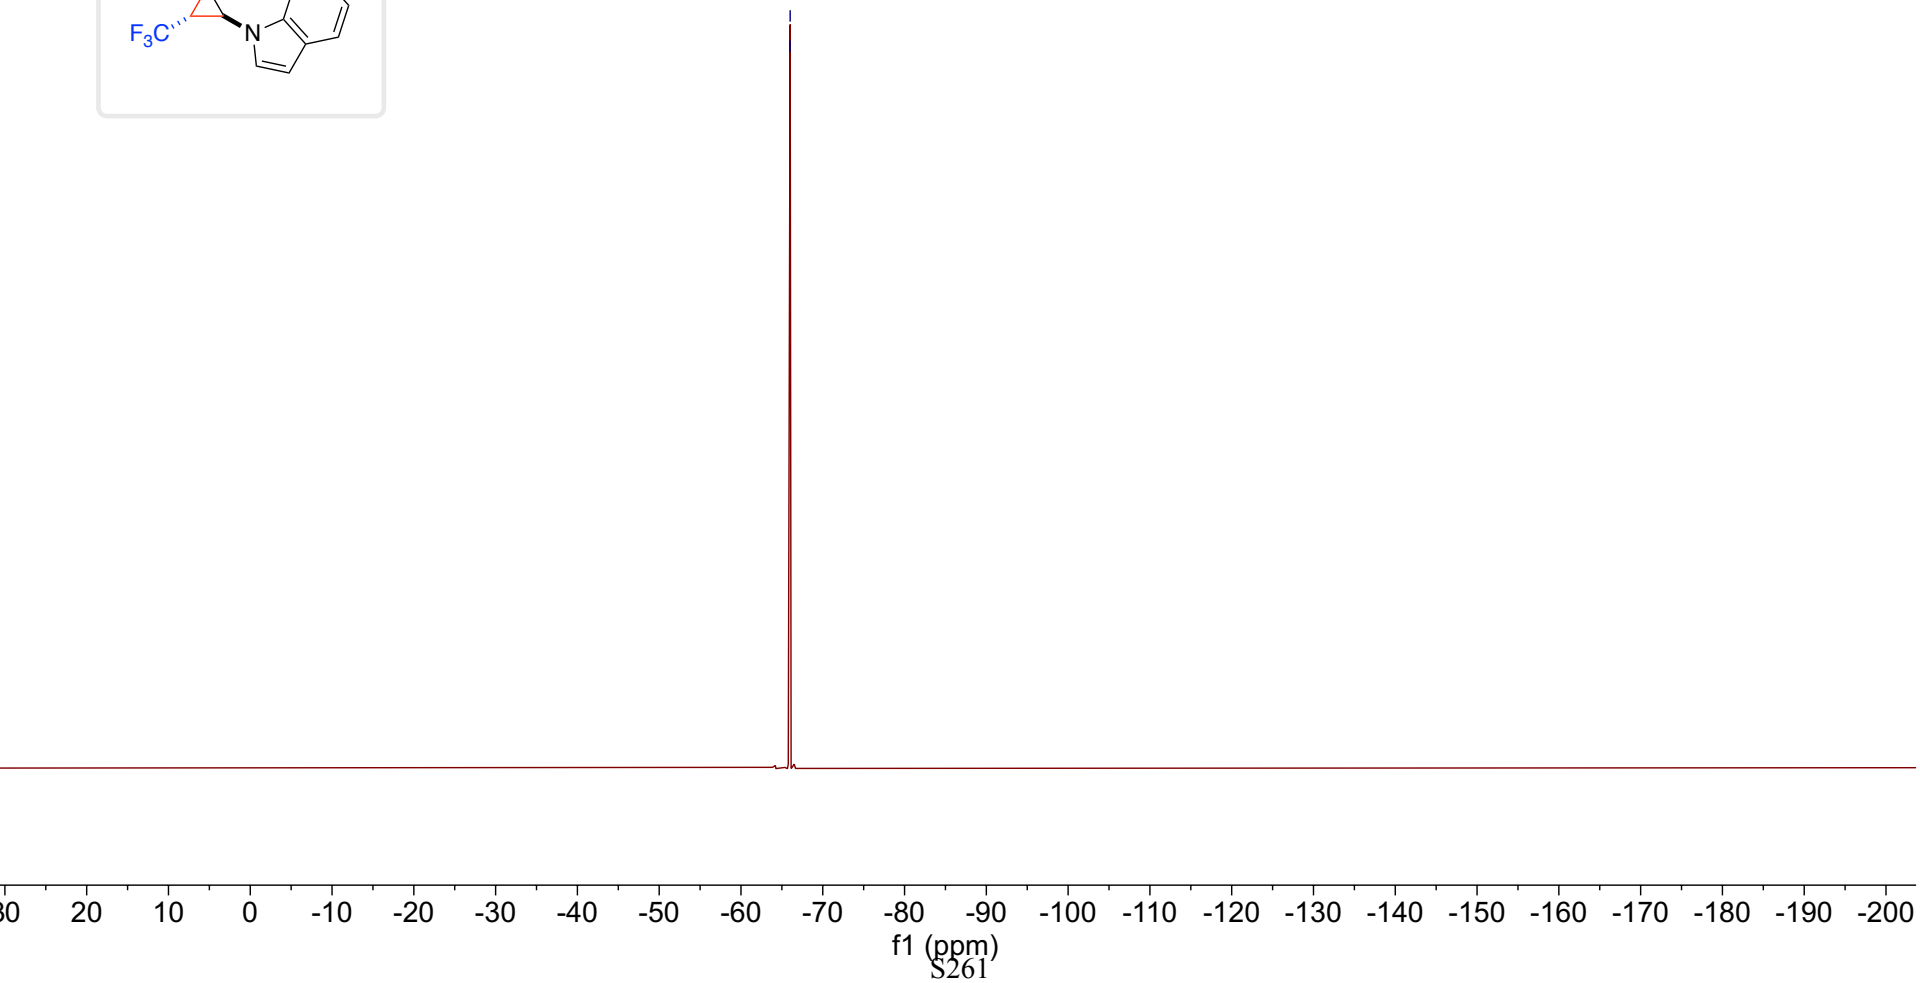

# HPLC of 3y

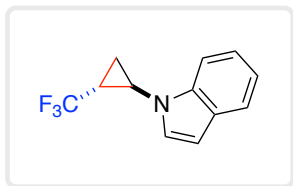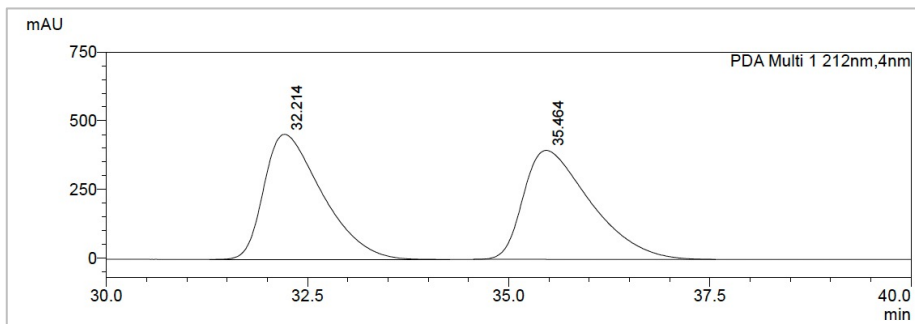

WCL-1437-2-ODH-2%0.8mL\_001.lcd

UV Spectrum

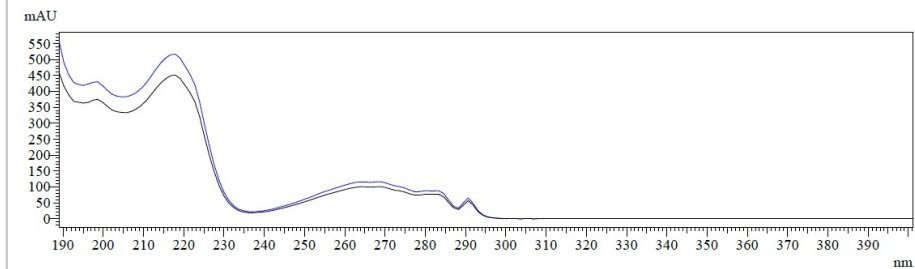

Peak Table  
PDA Ch1 212nm

| Peak# | Ret. Time | Area%   |
|-------|-----------|---------|
| 1     | 32.214    | 49.903  |
| 2     | 35.464    | 50.097  |
| Total |           | 100.000 |

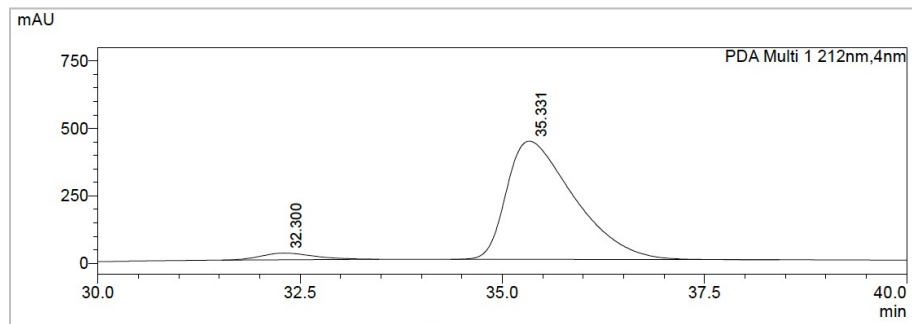

WCL-1438-1-ODH-2%0.8mL\_001.lcd

UV Spectrum

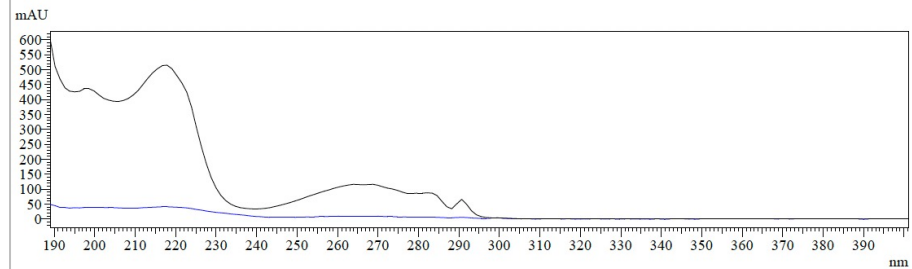

Peak Table  
PDA Ch1 212nm

| Peak# | Ret. Time | Area%   |
|-------|-----------|---------|
| 1     | 32.300    | 4.185   |
| 2     | 35.331    | 95.815  |
| Total |           | 100.000 |

<sup>1</sup>H NMR of **3z**  
in Chloroform-*d*

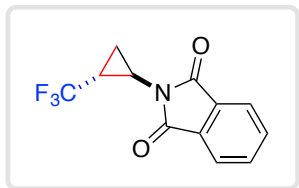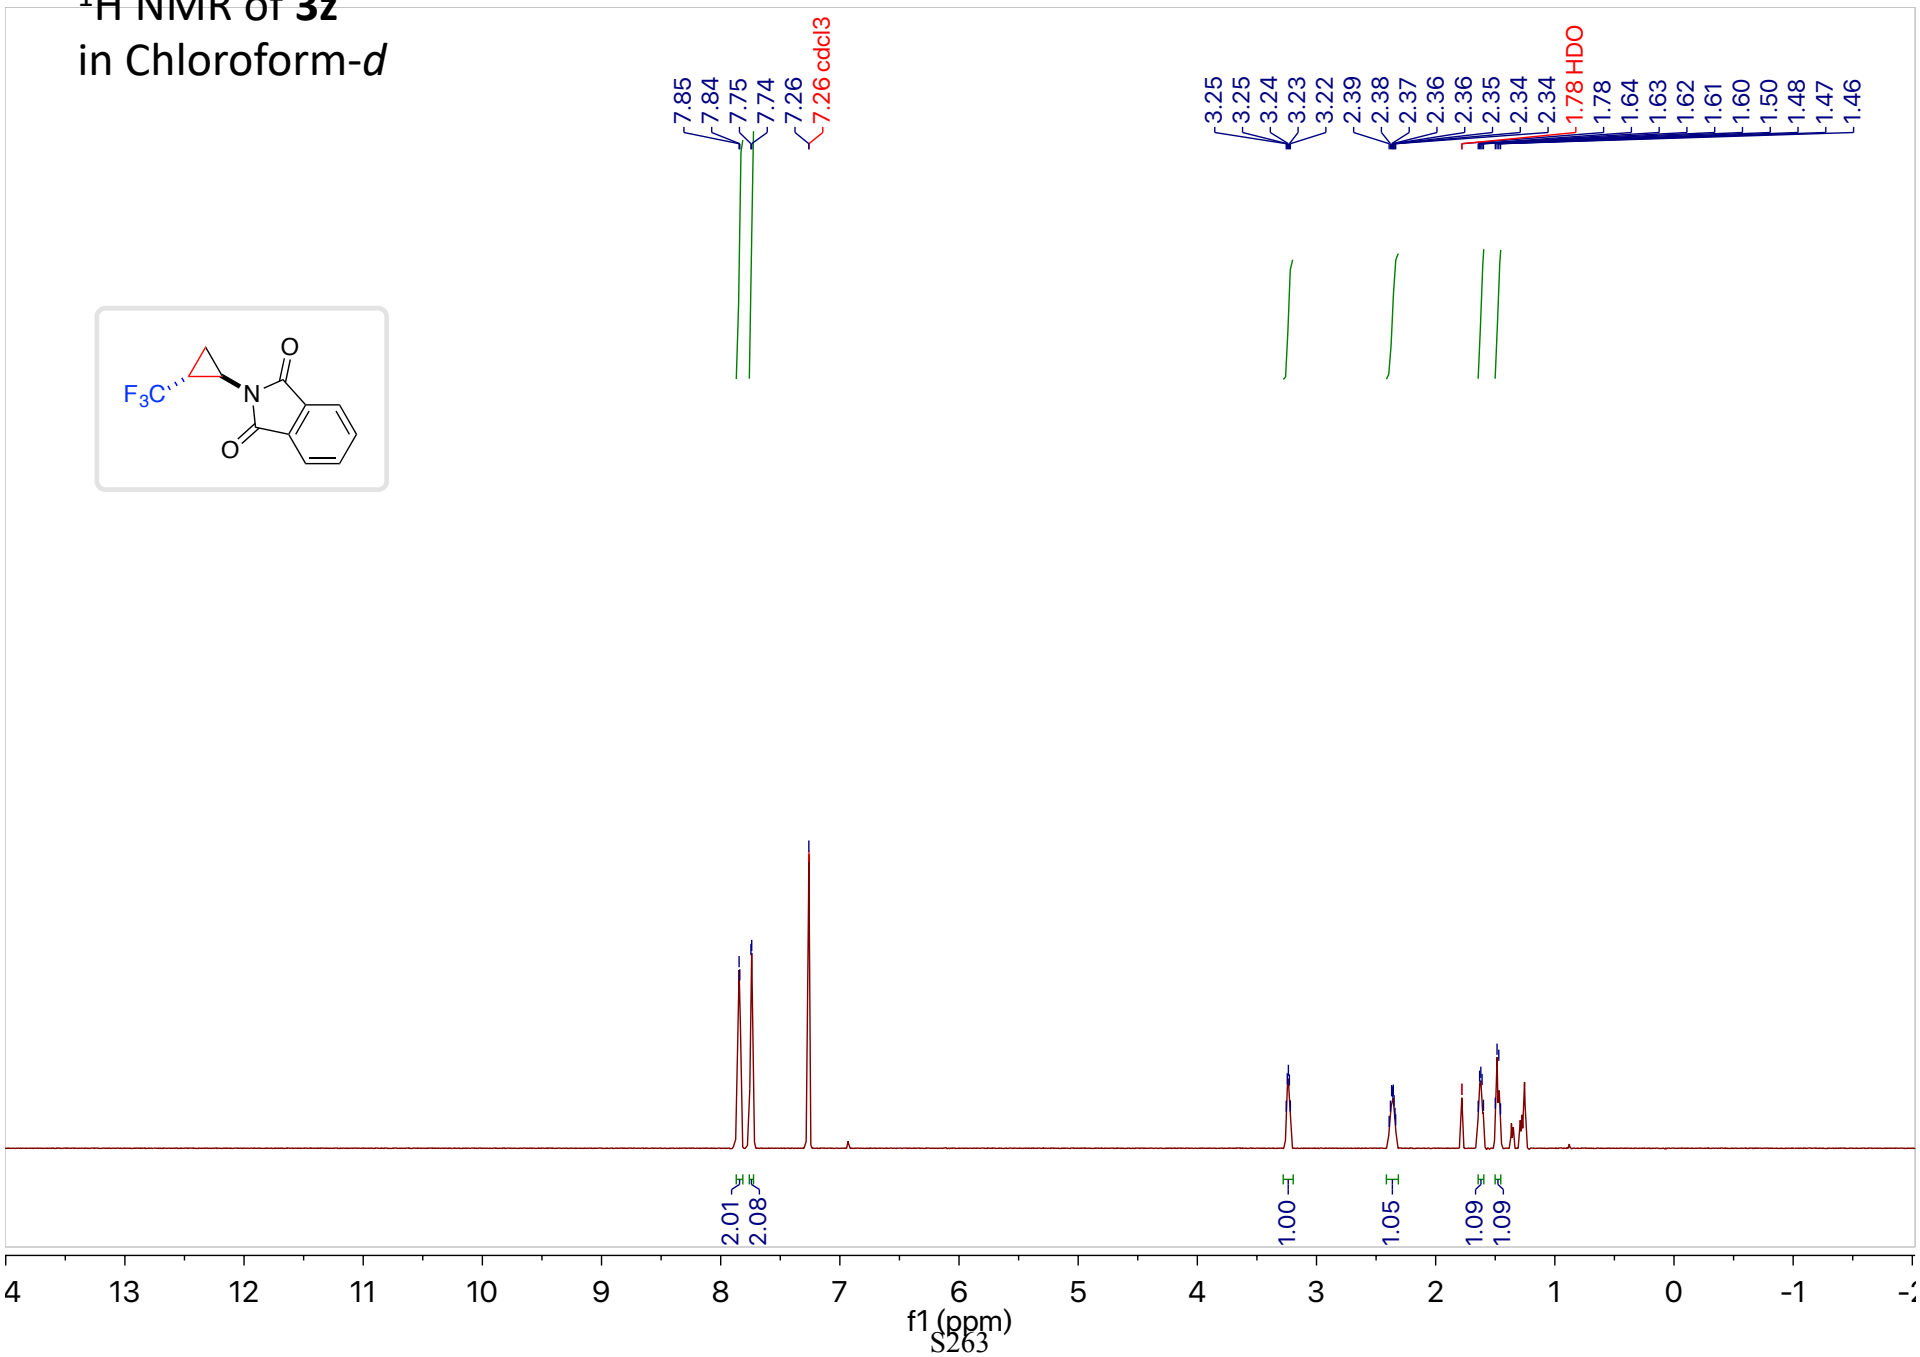



$^{13}\text{C}$  NMR of **3z**  
in Chloroform-*d*

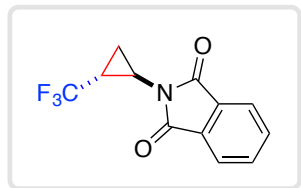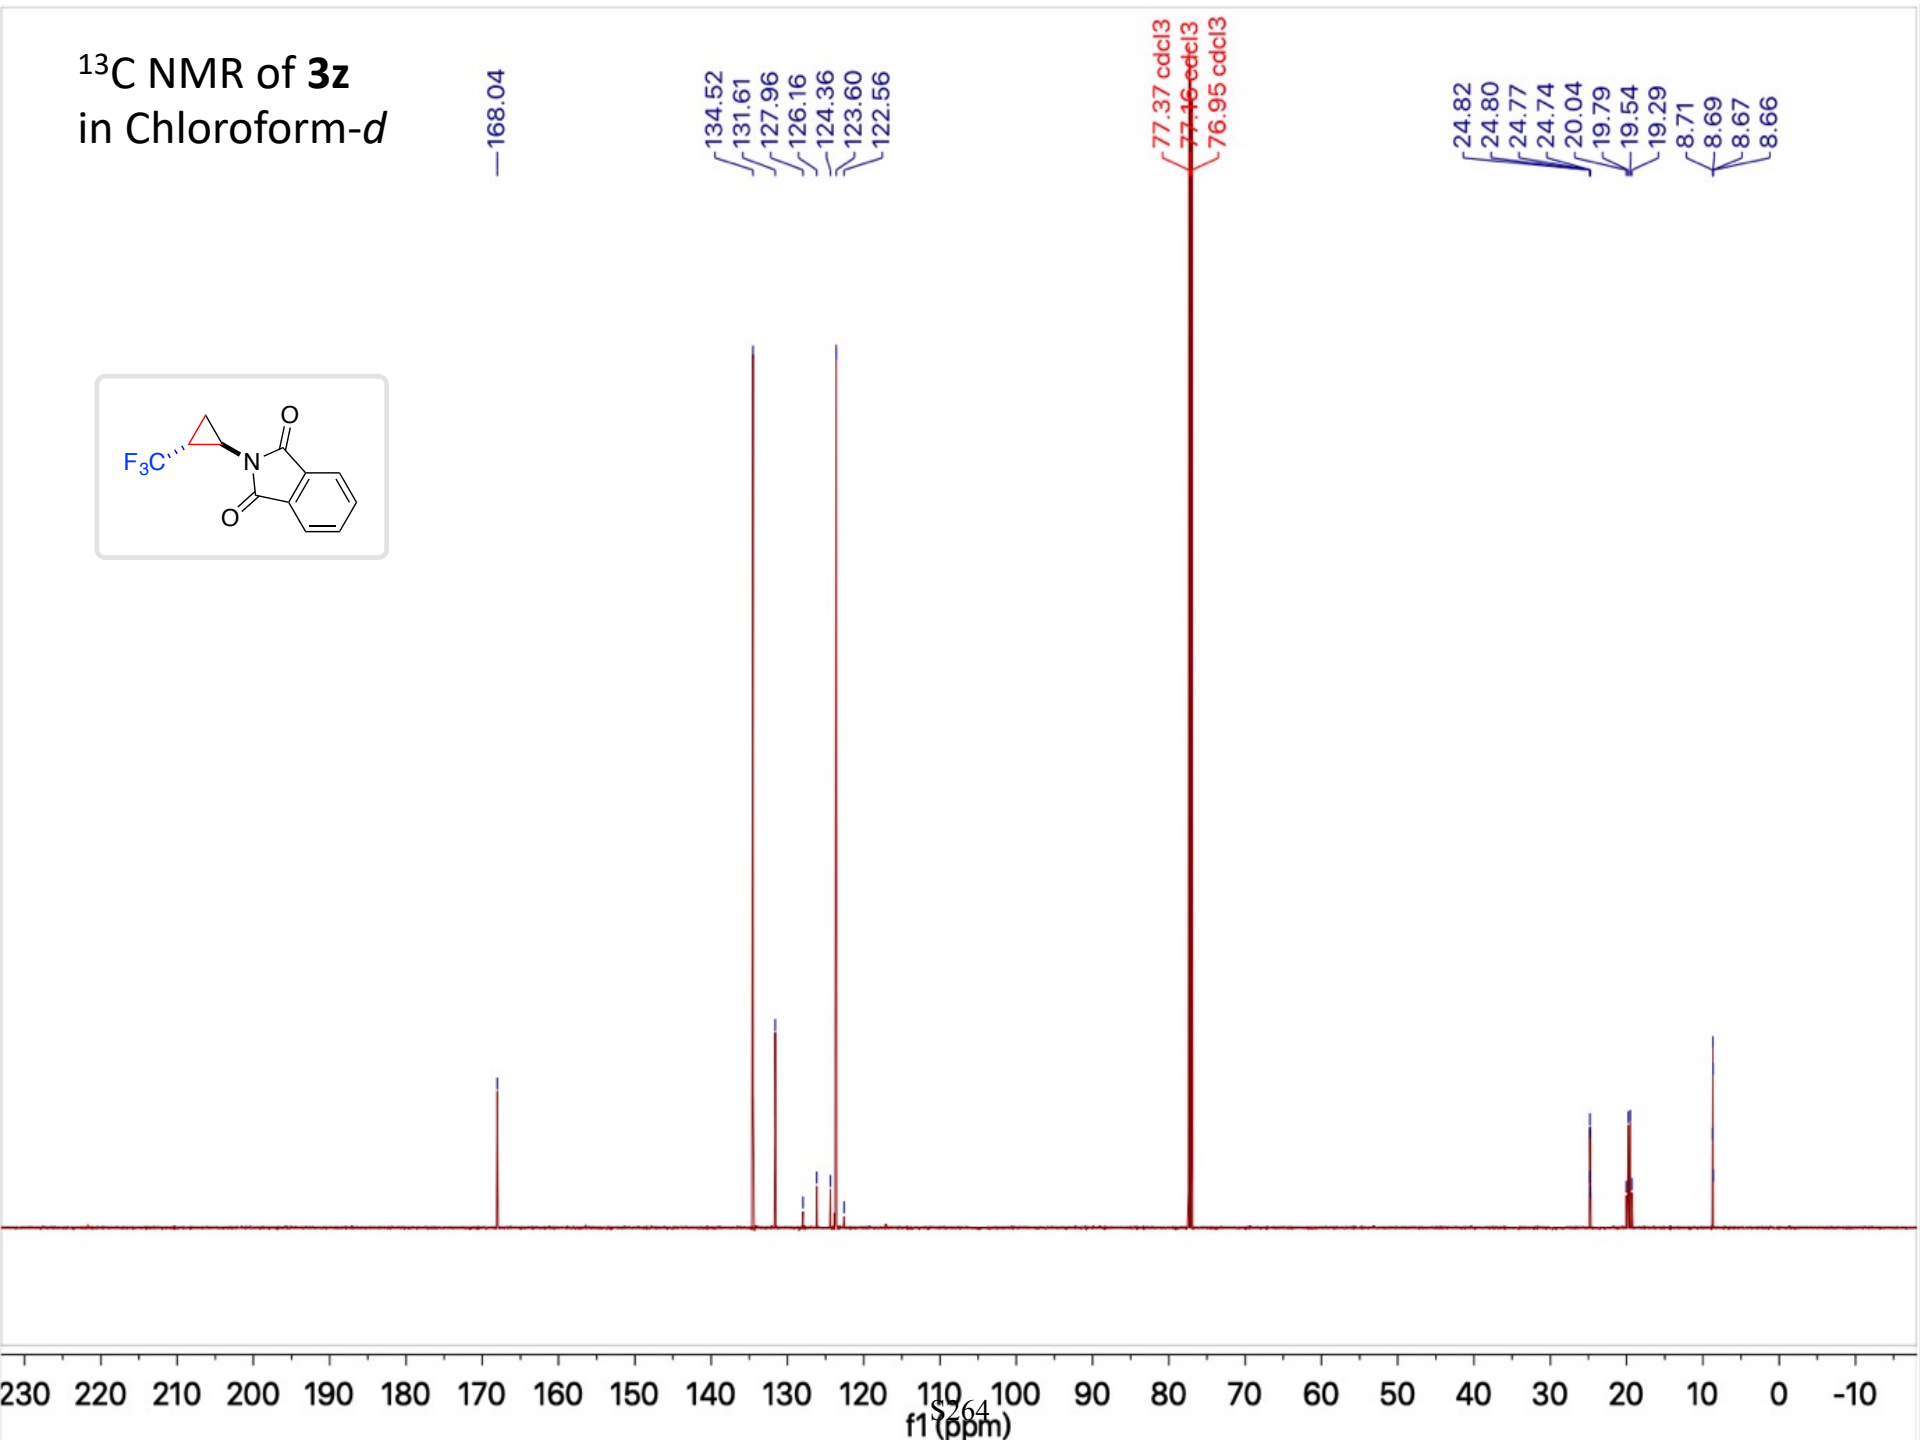

<sup>19</sup>F NMR of **3z**  
in Chloroform-*d*

-66.91  
-66.92

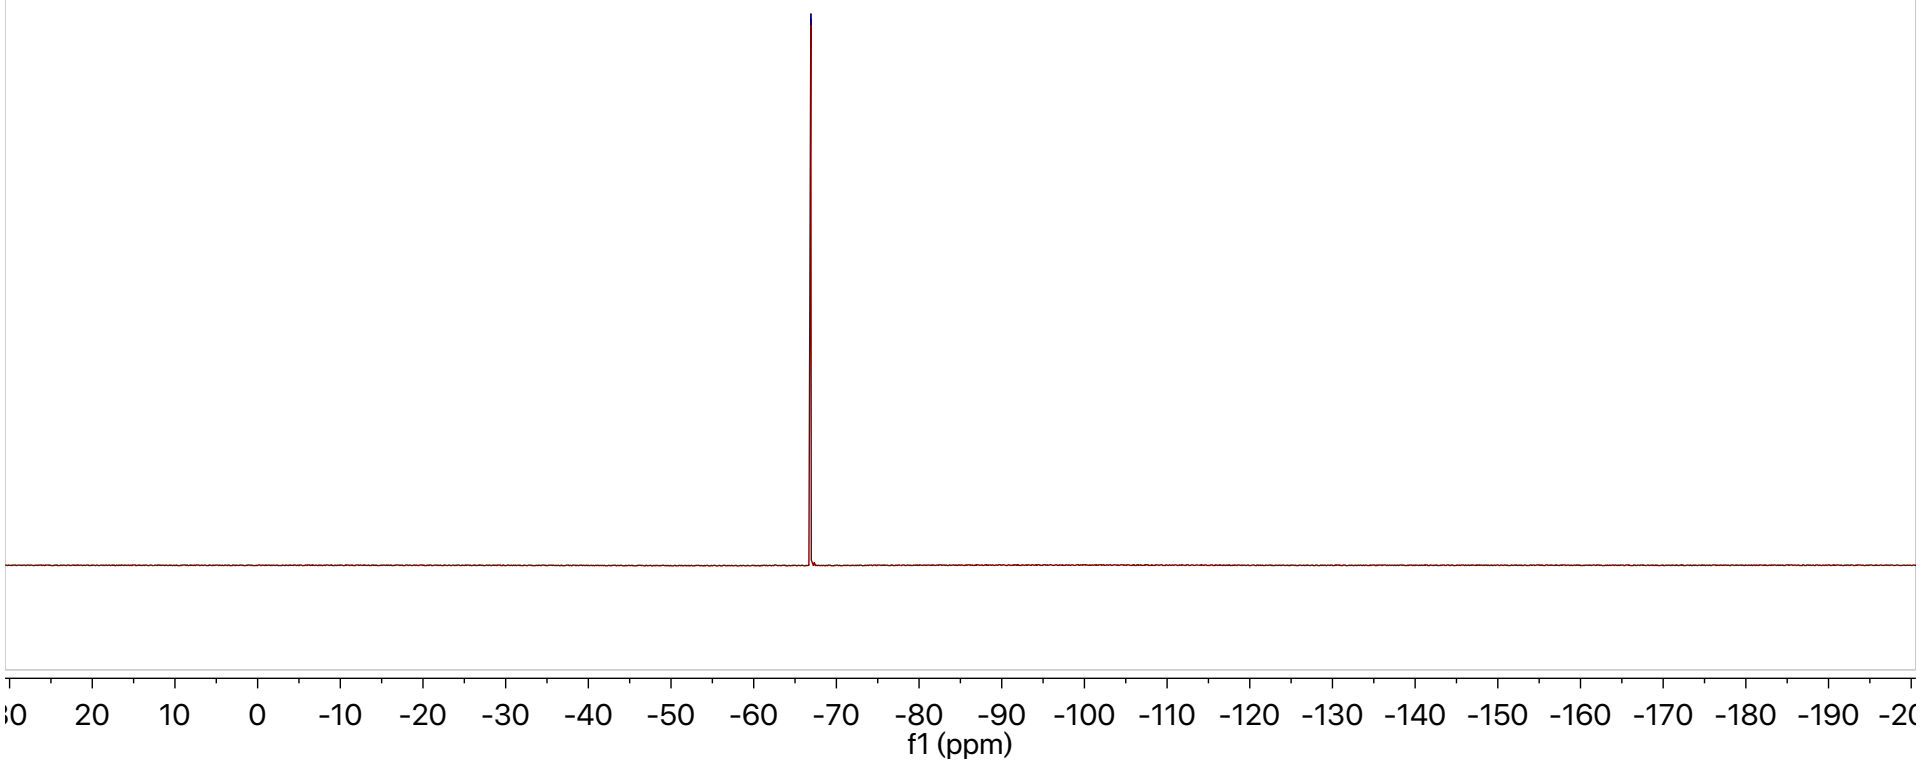

S265

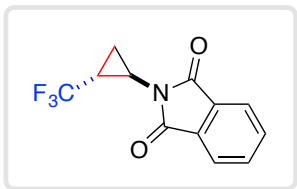

# HPLC of 3z

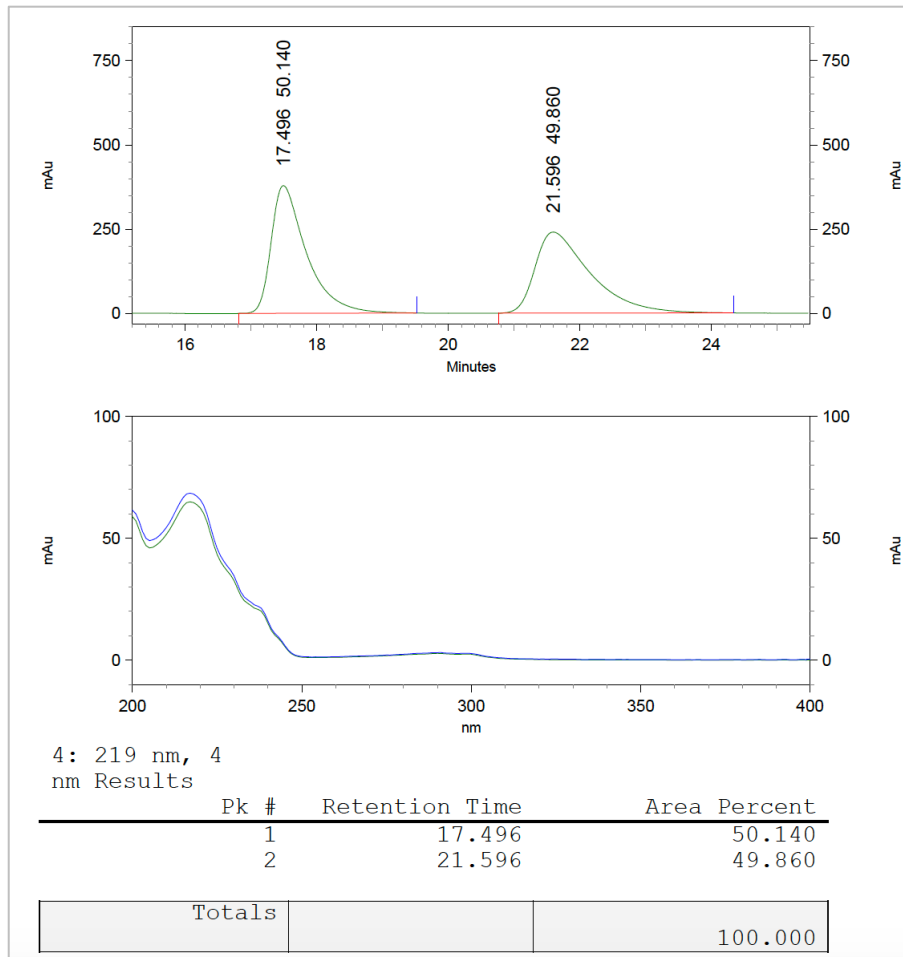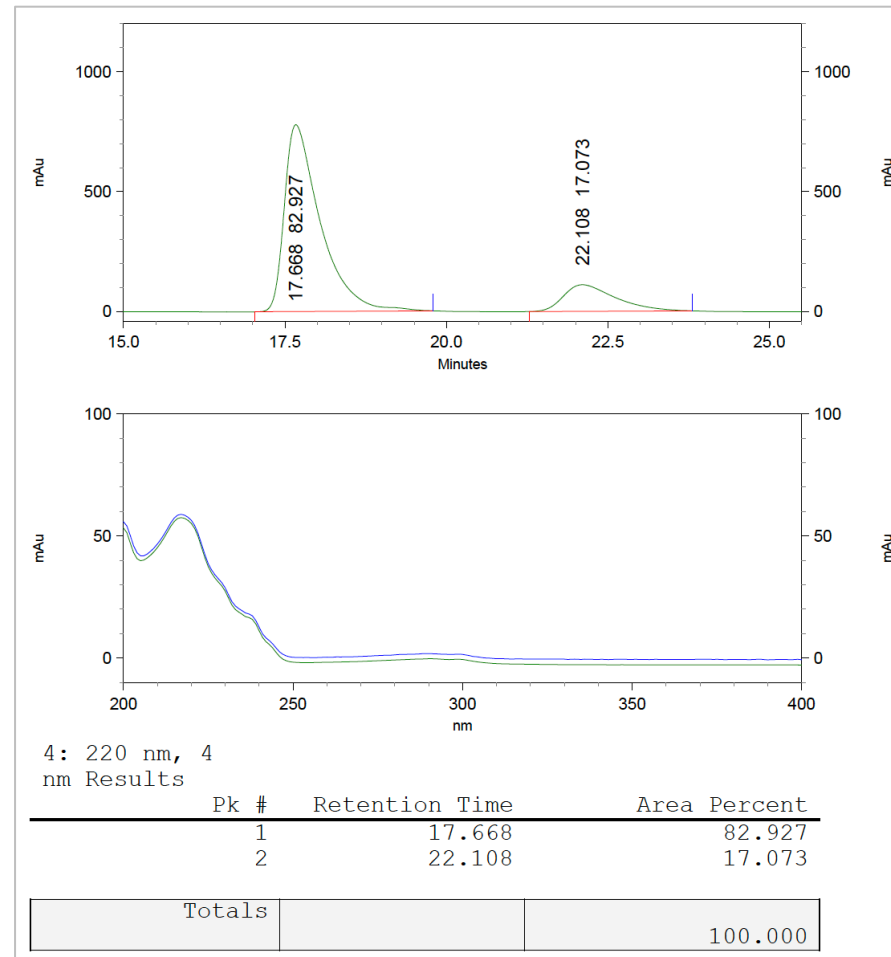

<sup>1</sup>H NMR of **3aa**  
in Chloroform-*d*

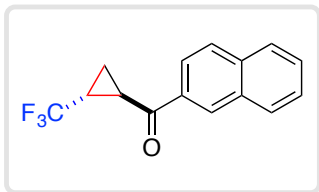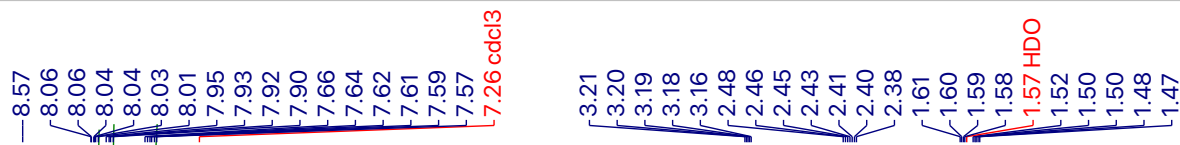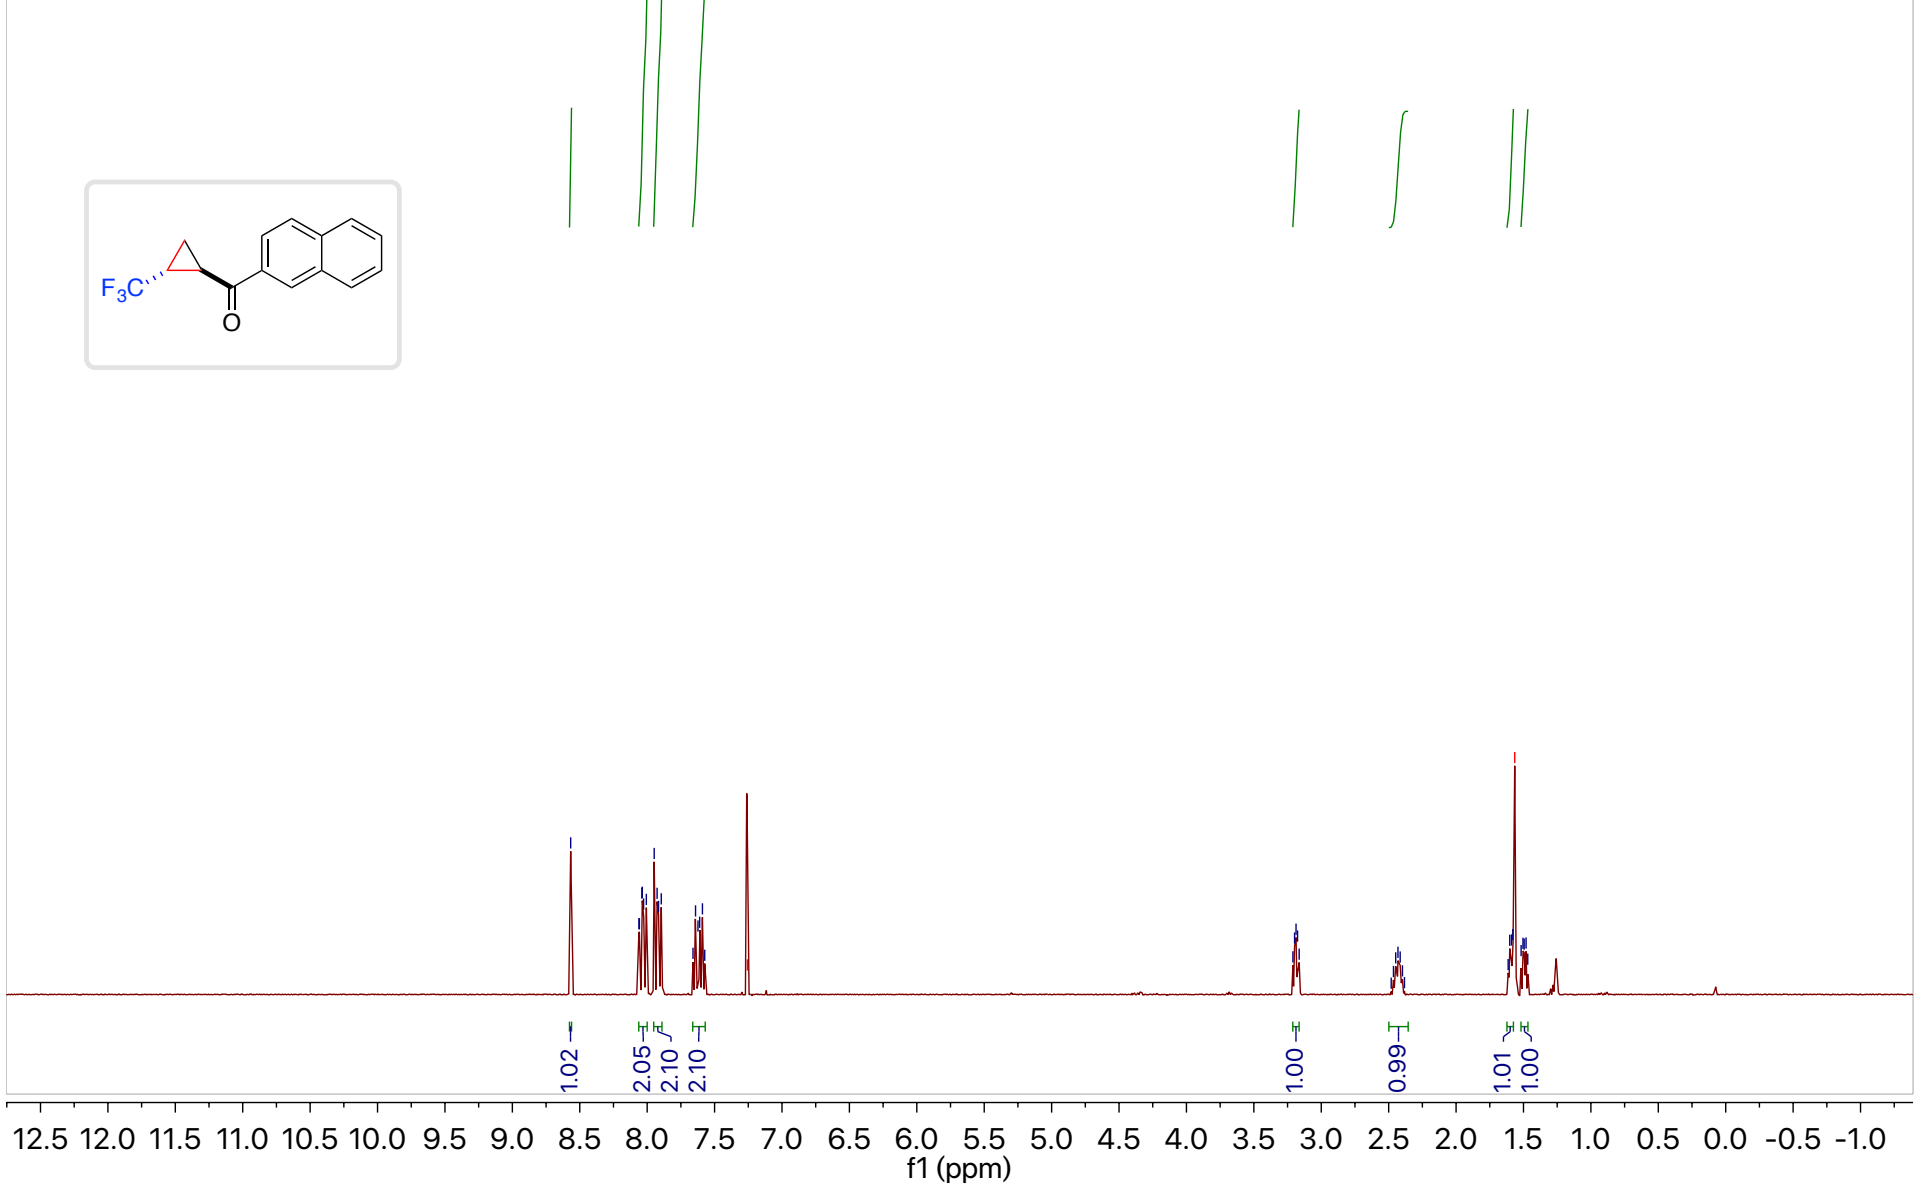

<sup>13</sup>C NMR of **3aa**  
in Chloroform-*d*

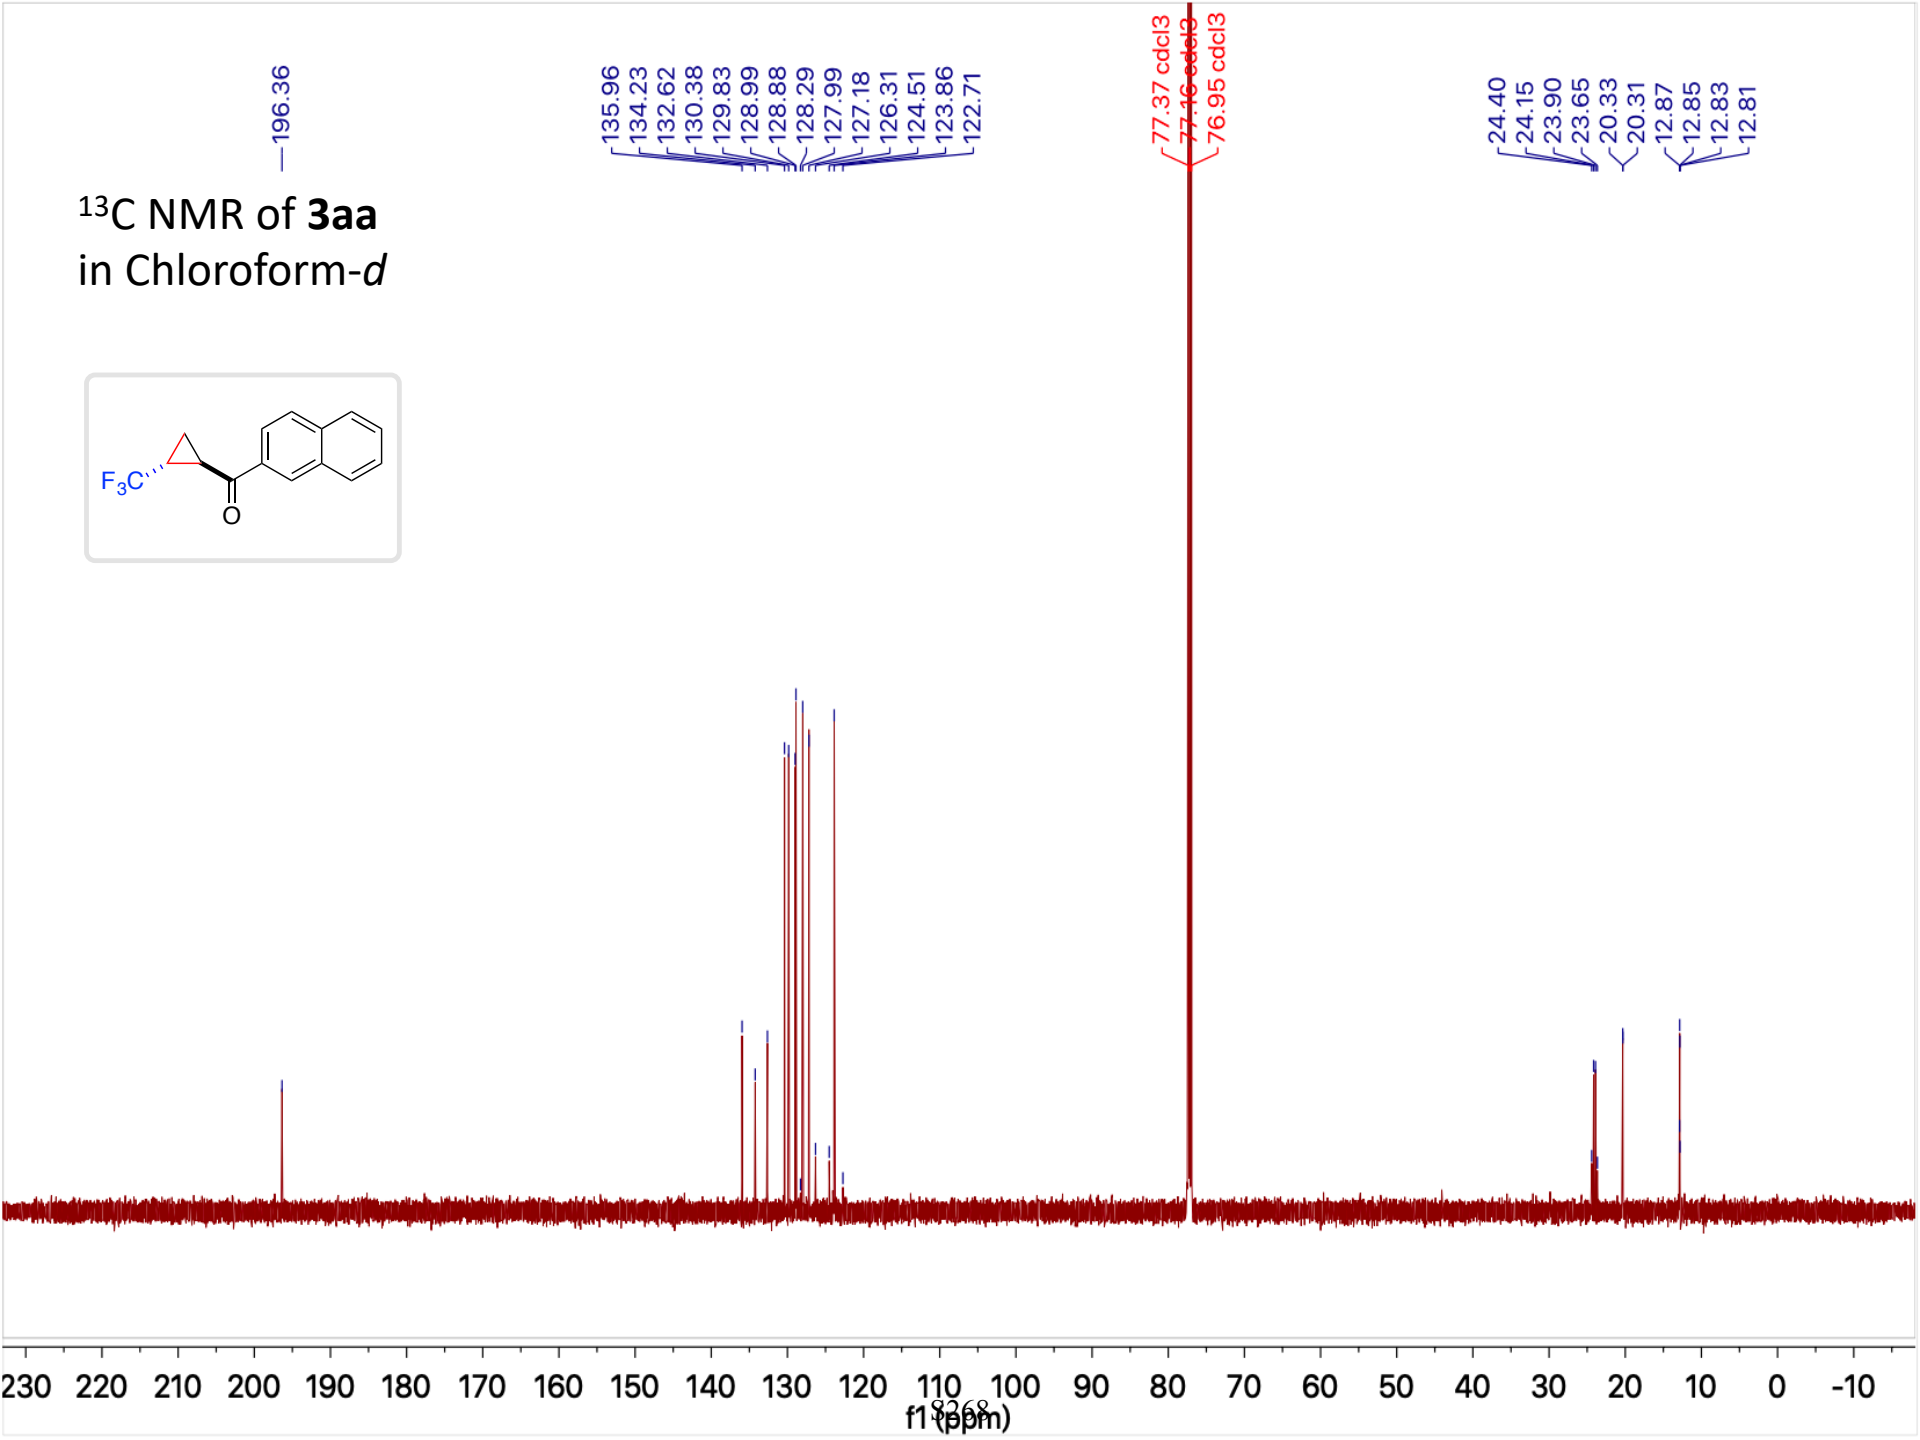

$^{19}\text{F}$  NMR of **3aa**  
in Chloroform-*d*

-66.67  
-66.68

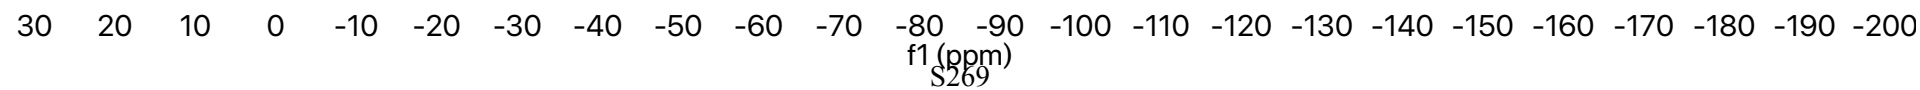

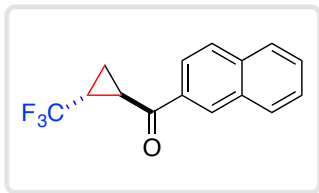

# HPLC of 3aa

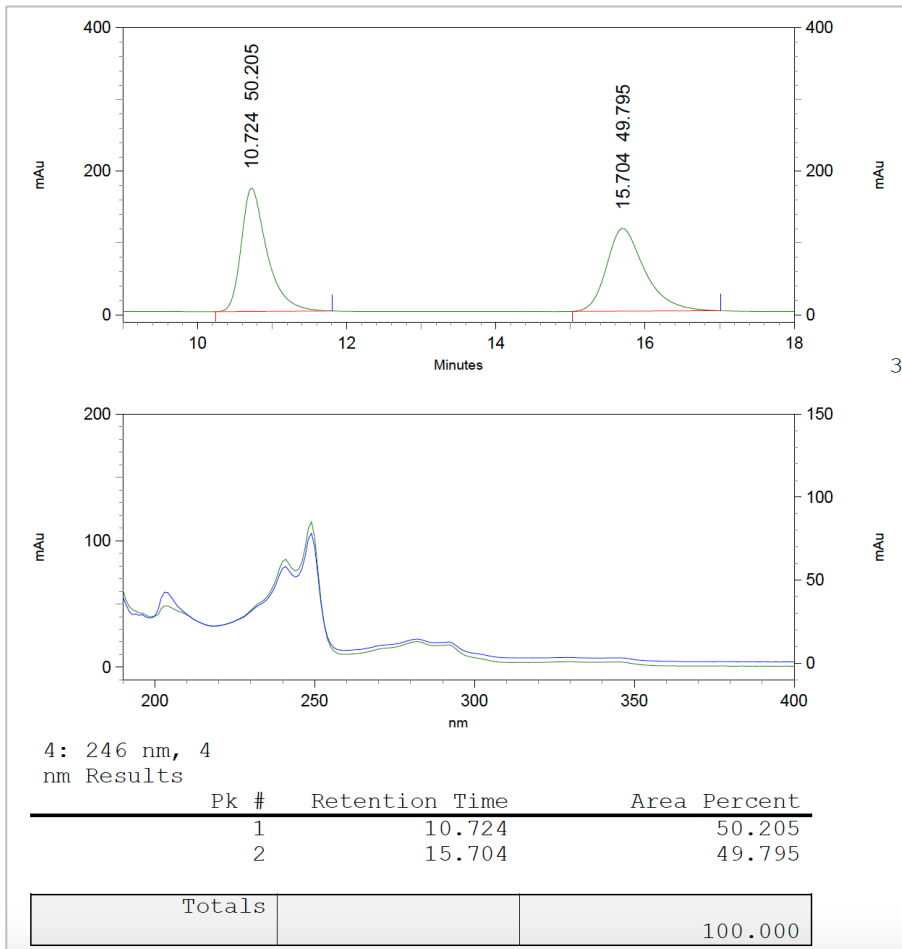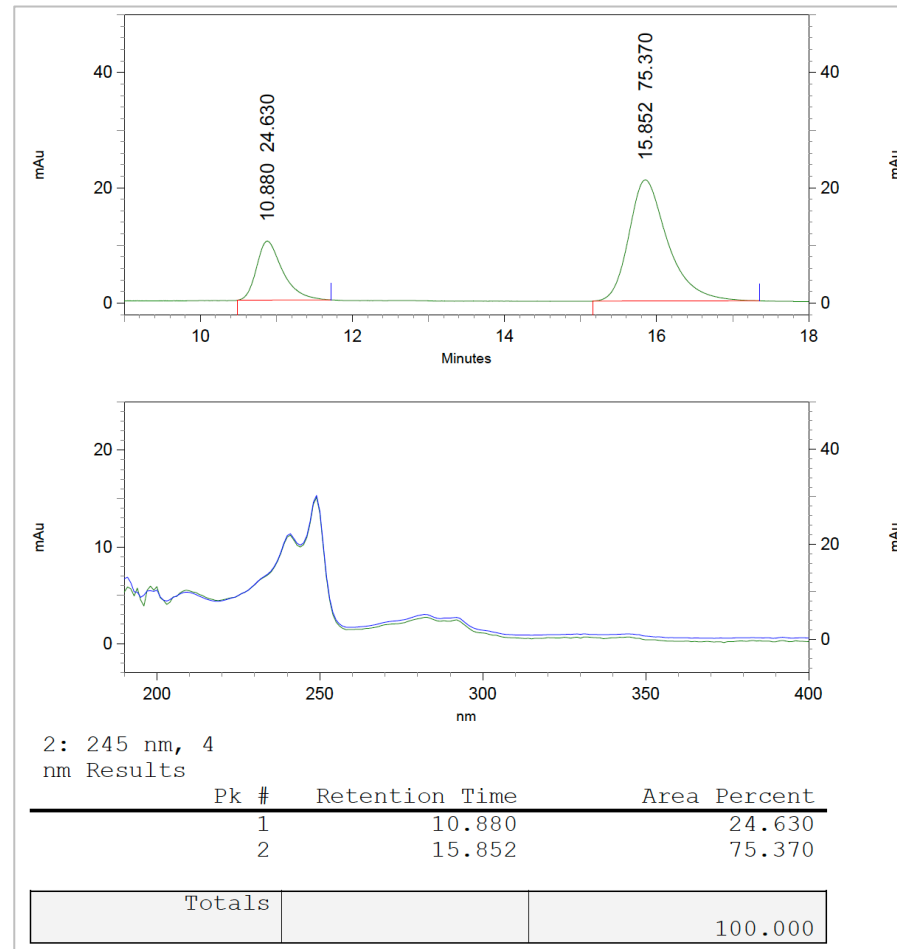

<sup>1</sup>H NMR of **3ab**  
in Chloroform-*d*

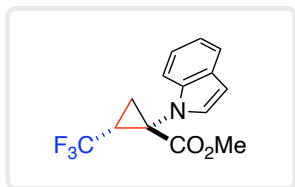

62:38 d.r.

Another set belongs to diastereomer (•)

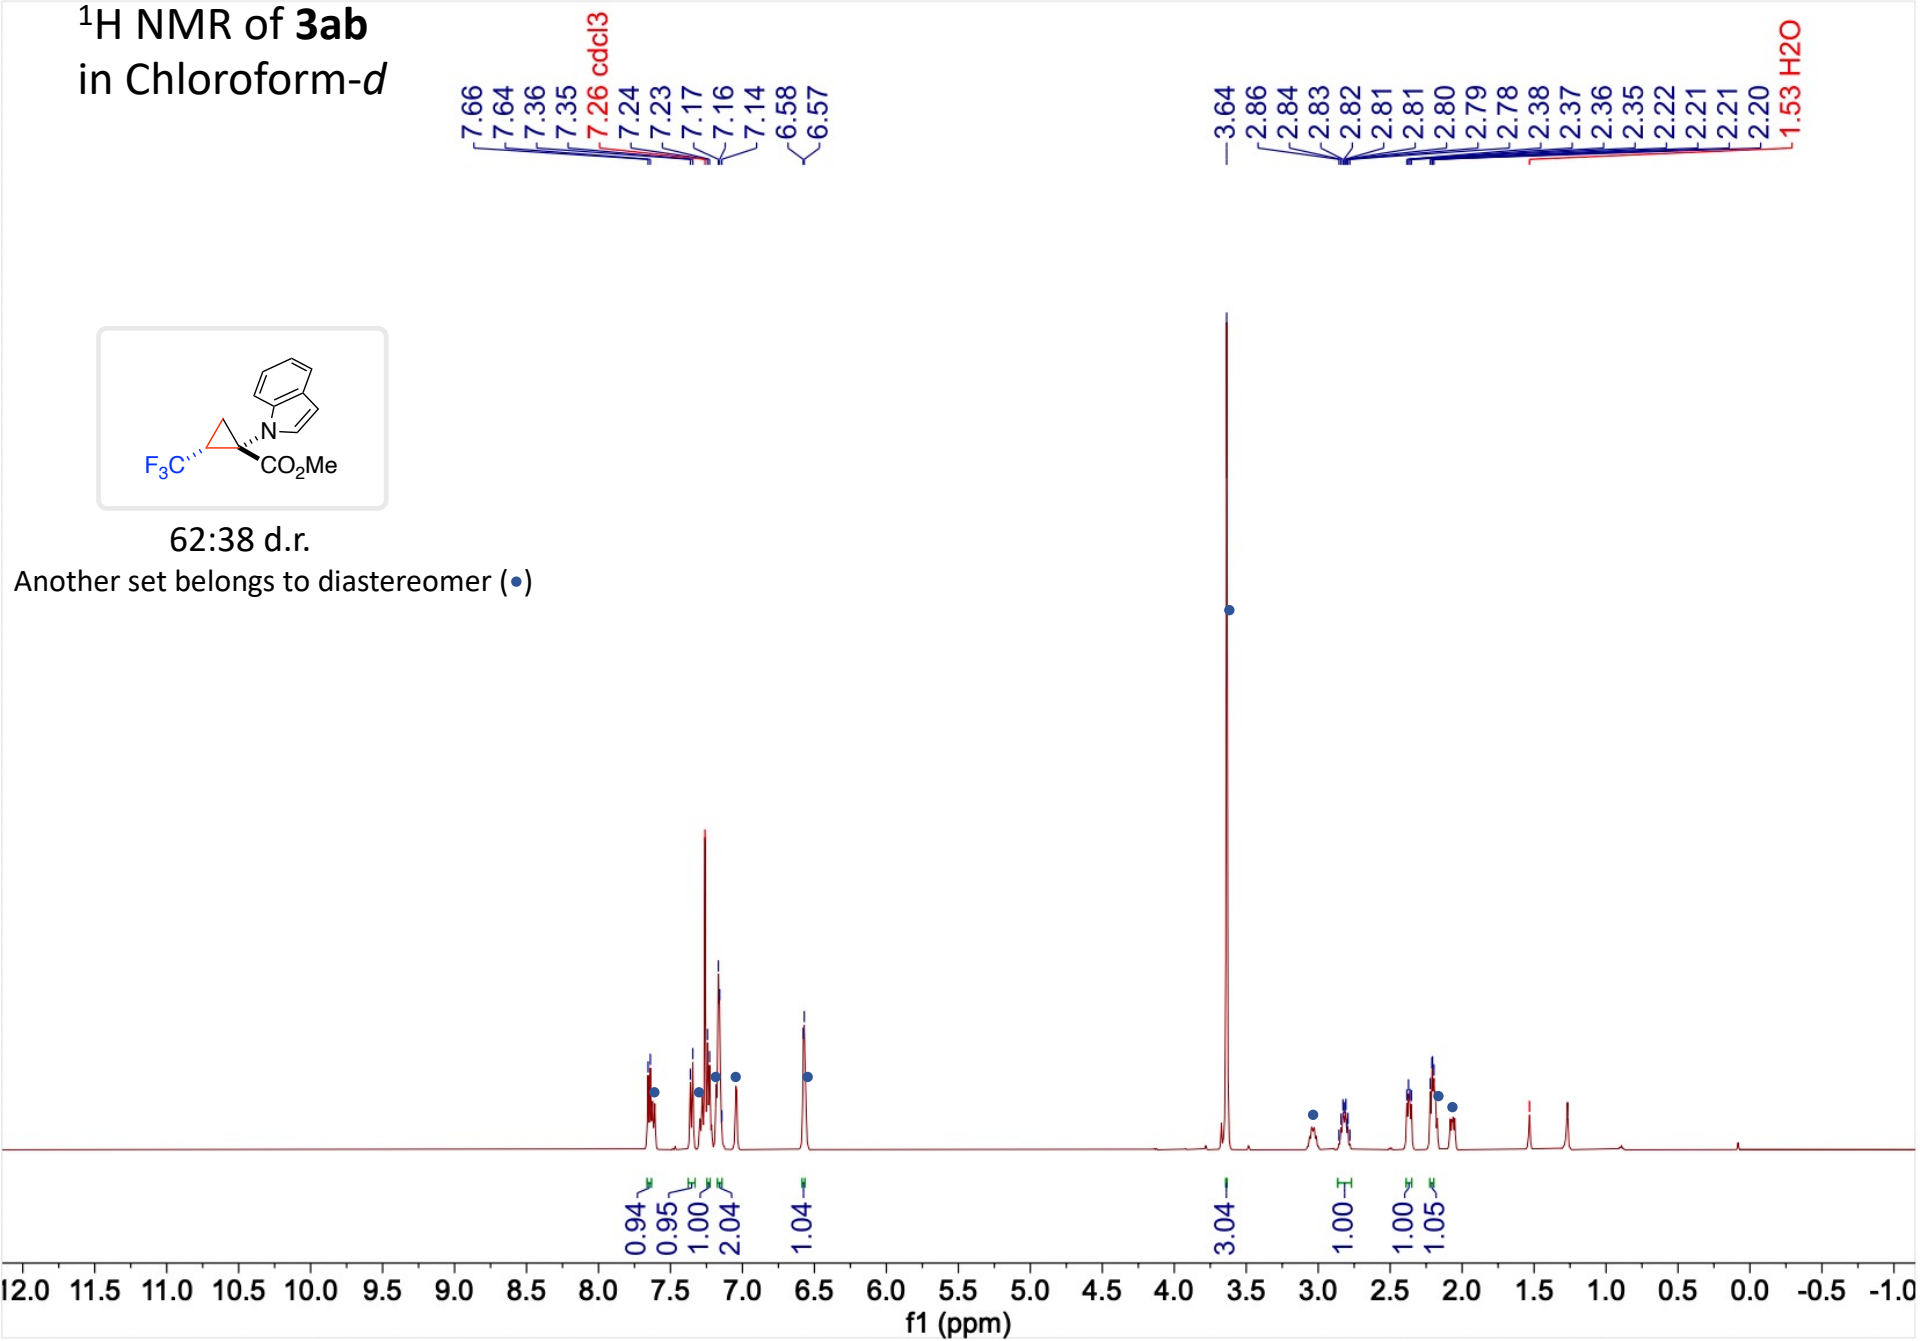



$^{13}\text{C}$  NMR of **3ab**  
in Chloroform-*d*



62:38 d.r.

Another set belongs to diastereomer (•)

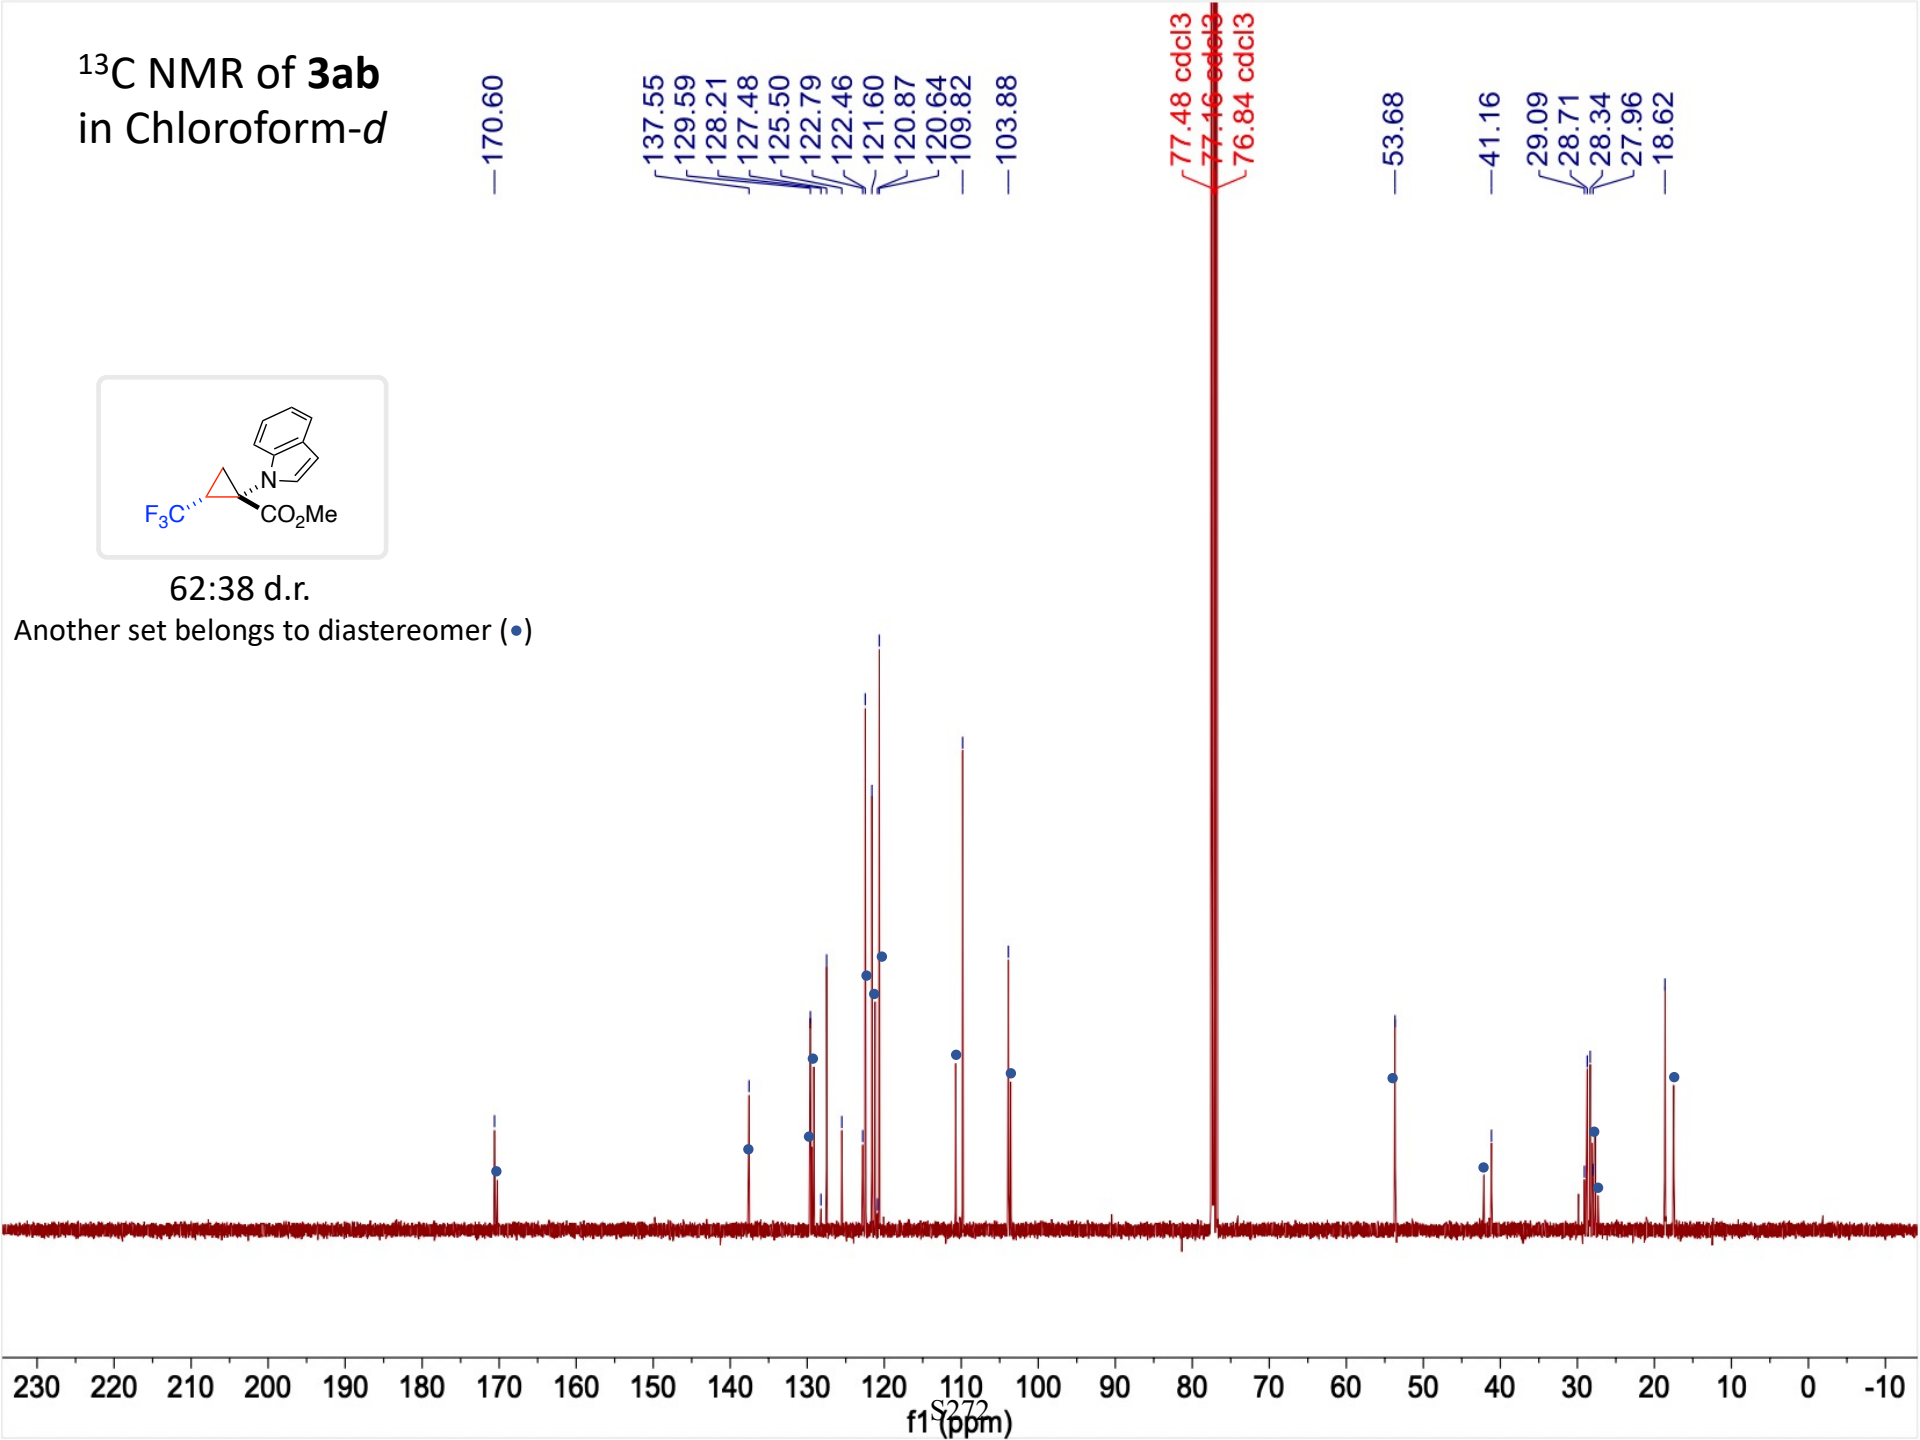

$^{19}\text{F}$  NMR of **3ab**  
in Chloroform-*d*

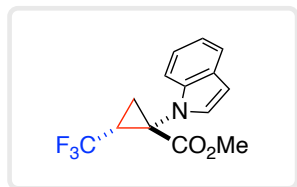

62:38 d.r.

Another set belongs to diastereomer (•)

{  
-62.11  
-62.13  
}

0 20 10 0 -10 -20 -30 -40 -50 -60 -70 -80 -90 -100 -110 -120 -130 -140 -150 -160 -170 -180 -190 -200

f1 (ppm)

S273

# HPLC of 3ab

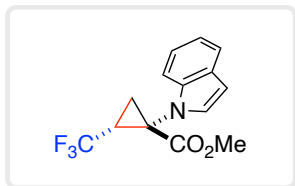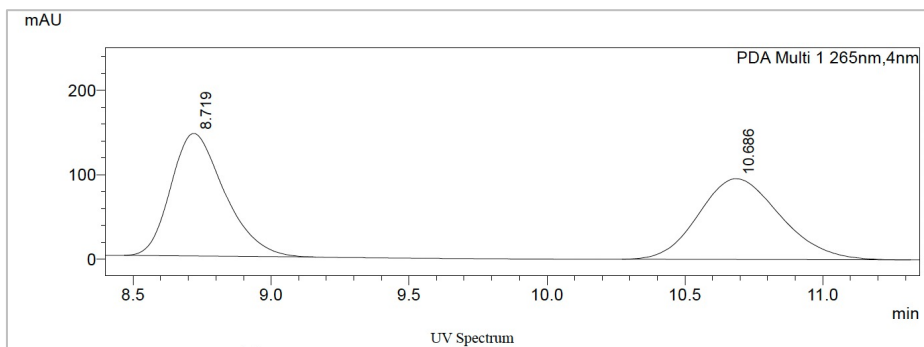

WCL-1431-1-ODH-5%0.8mL\_001.lcd

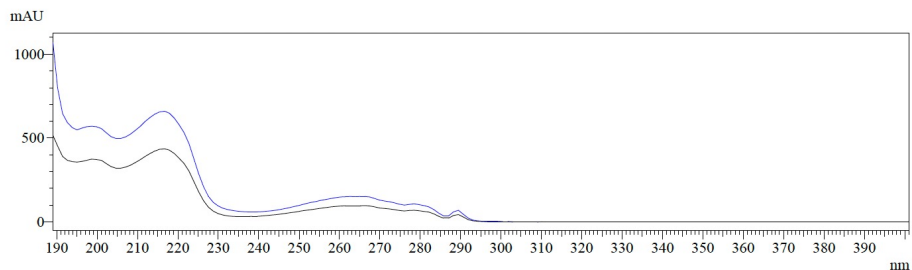

Peak Table  
PDA Ch1 265nm

| Peak# | Ret. Time | Area%   |
|-------|-----------|---------|
| 1     | 8.719     | 49.964  |
| 2     | 10.686    | 50.036  |
| Total |           | 100.000 |

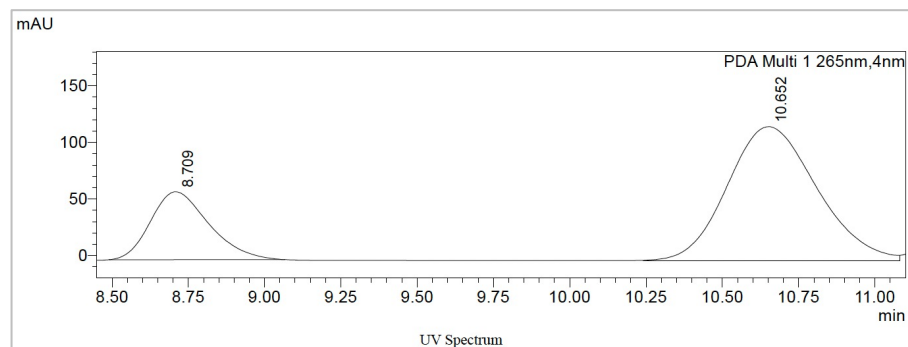

WCL-1432-ODH-5%0.8mL\_002.lcd

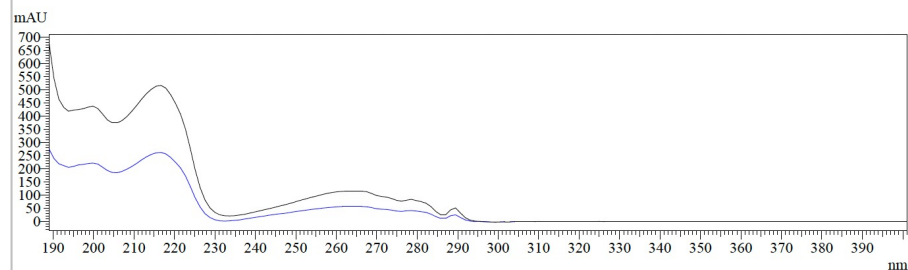

Peak Table  
PDA Ch1 265nm

| Peak# | Ret. Time | Area%   |
|-------|-----------|---------|
| 1     | 8.709     | 24.850  |
| 2     | 10.652    | 75.150  |
| Total |           | 100.000 |

# <sup>1</sup>H NMR of **3ac**

in Chloroform-*d*

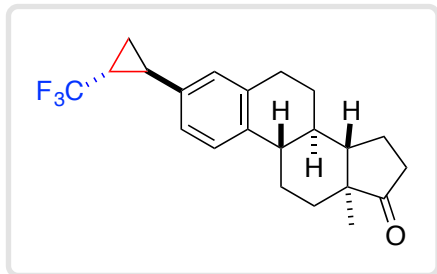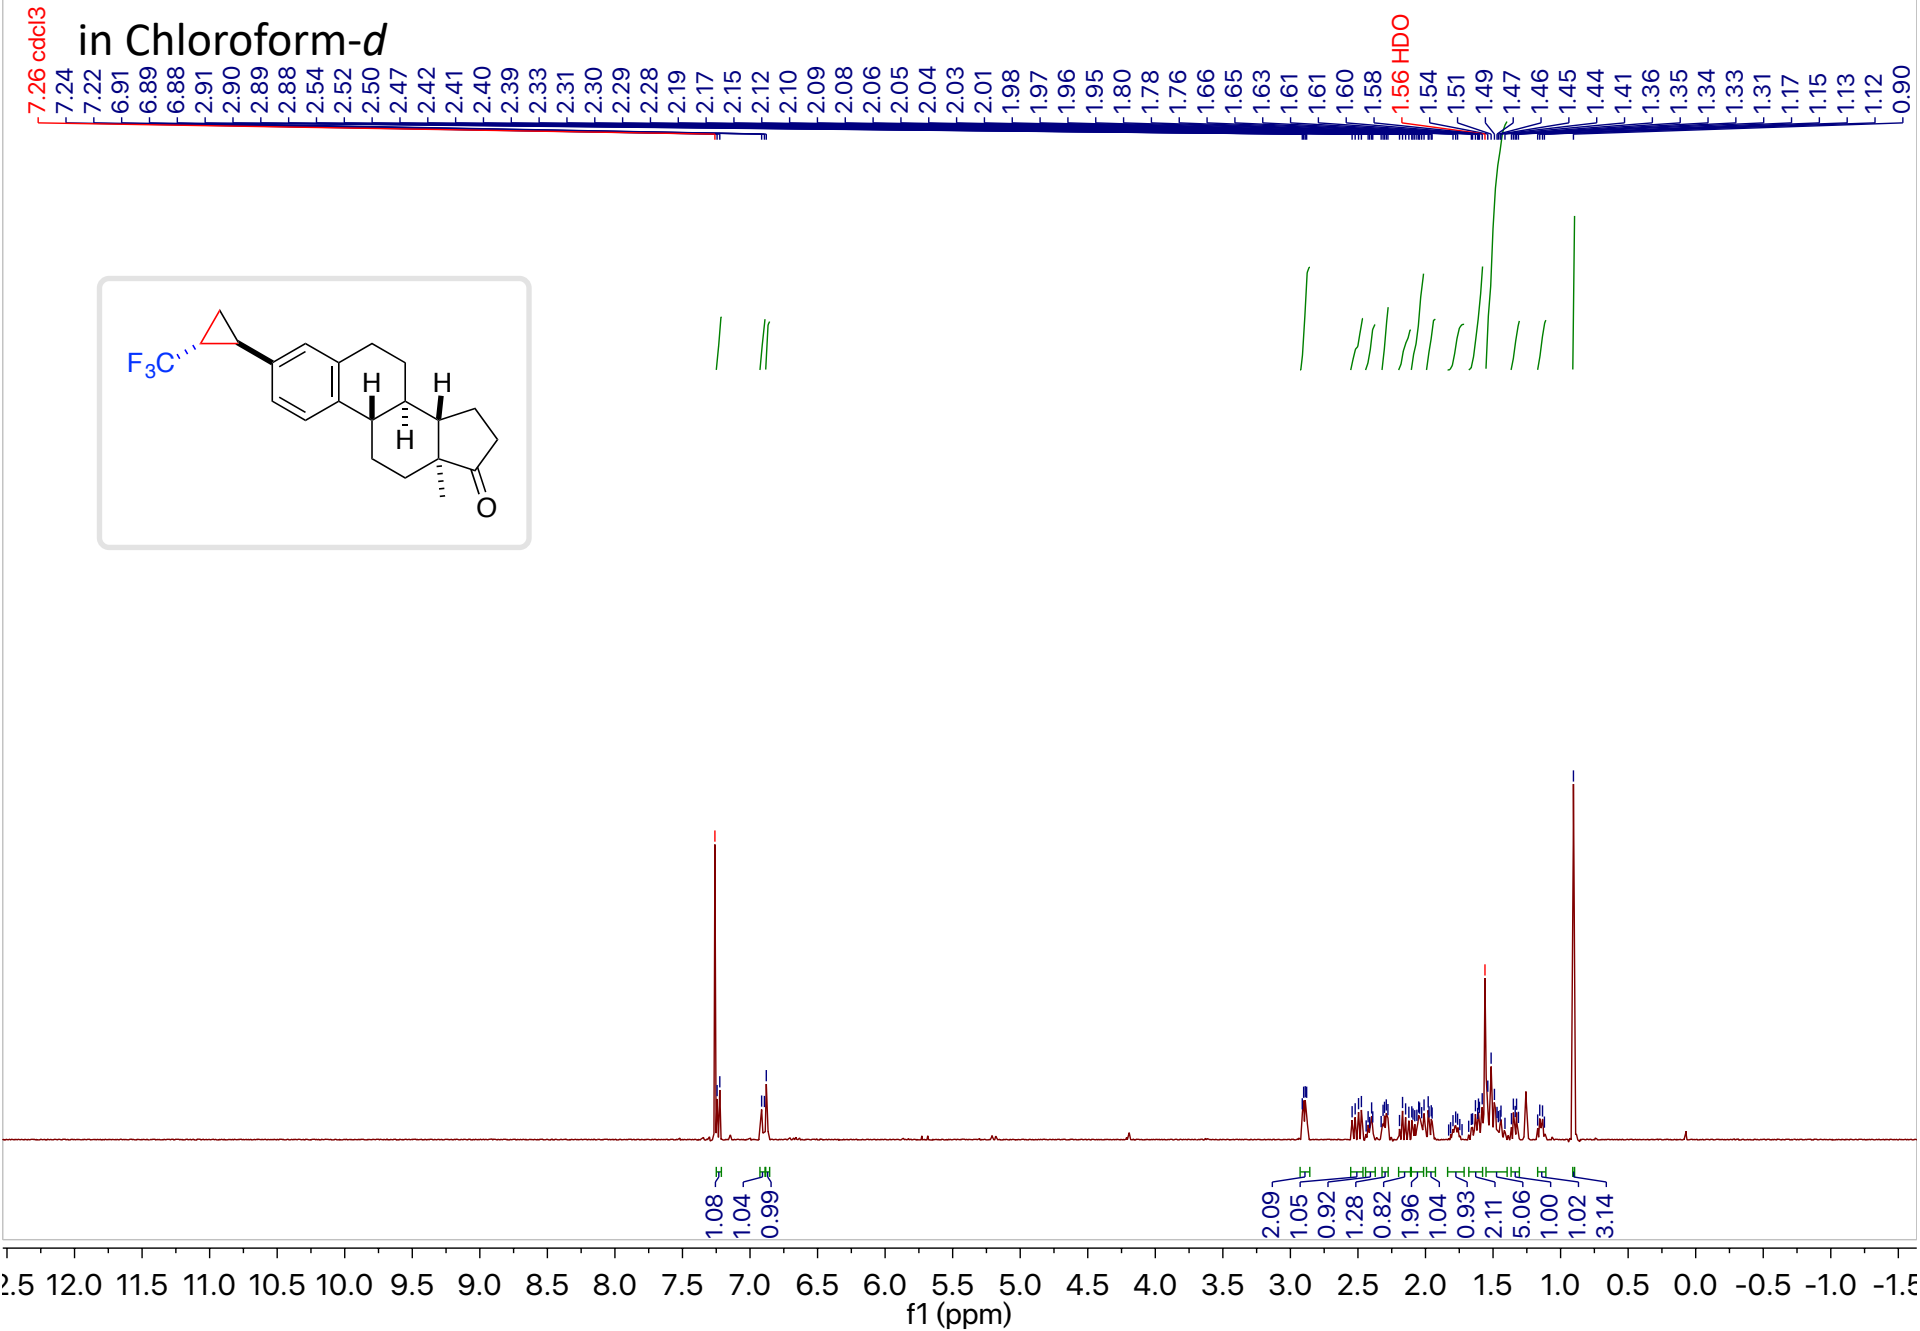

<sup>13</sup>C NMR of **3ac**  
in Chloroform-*d*

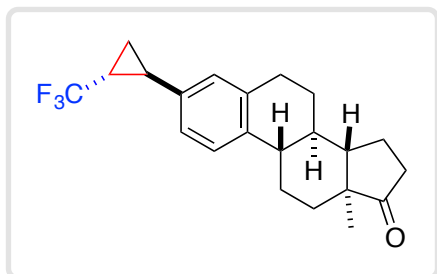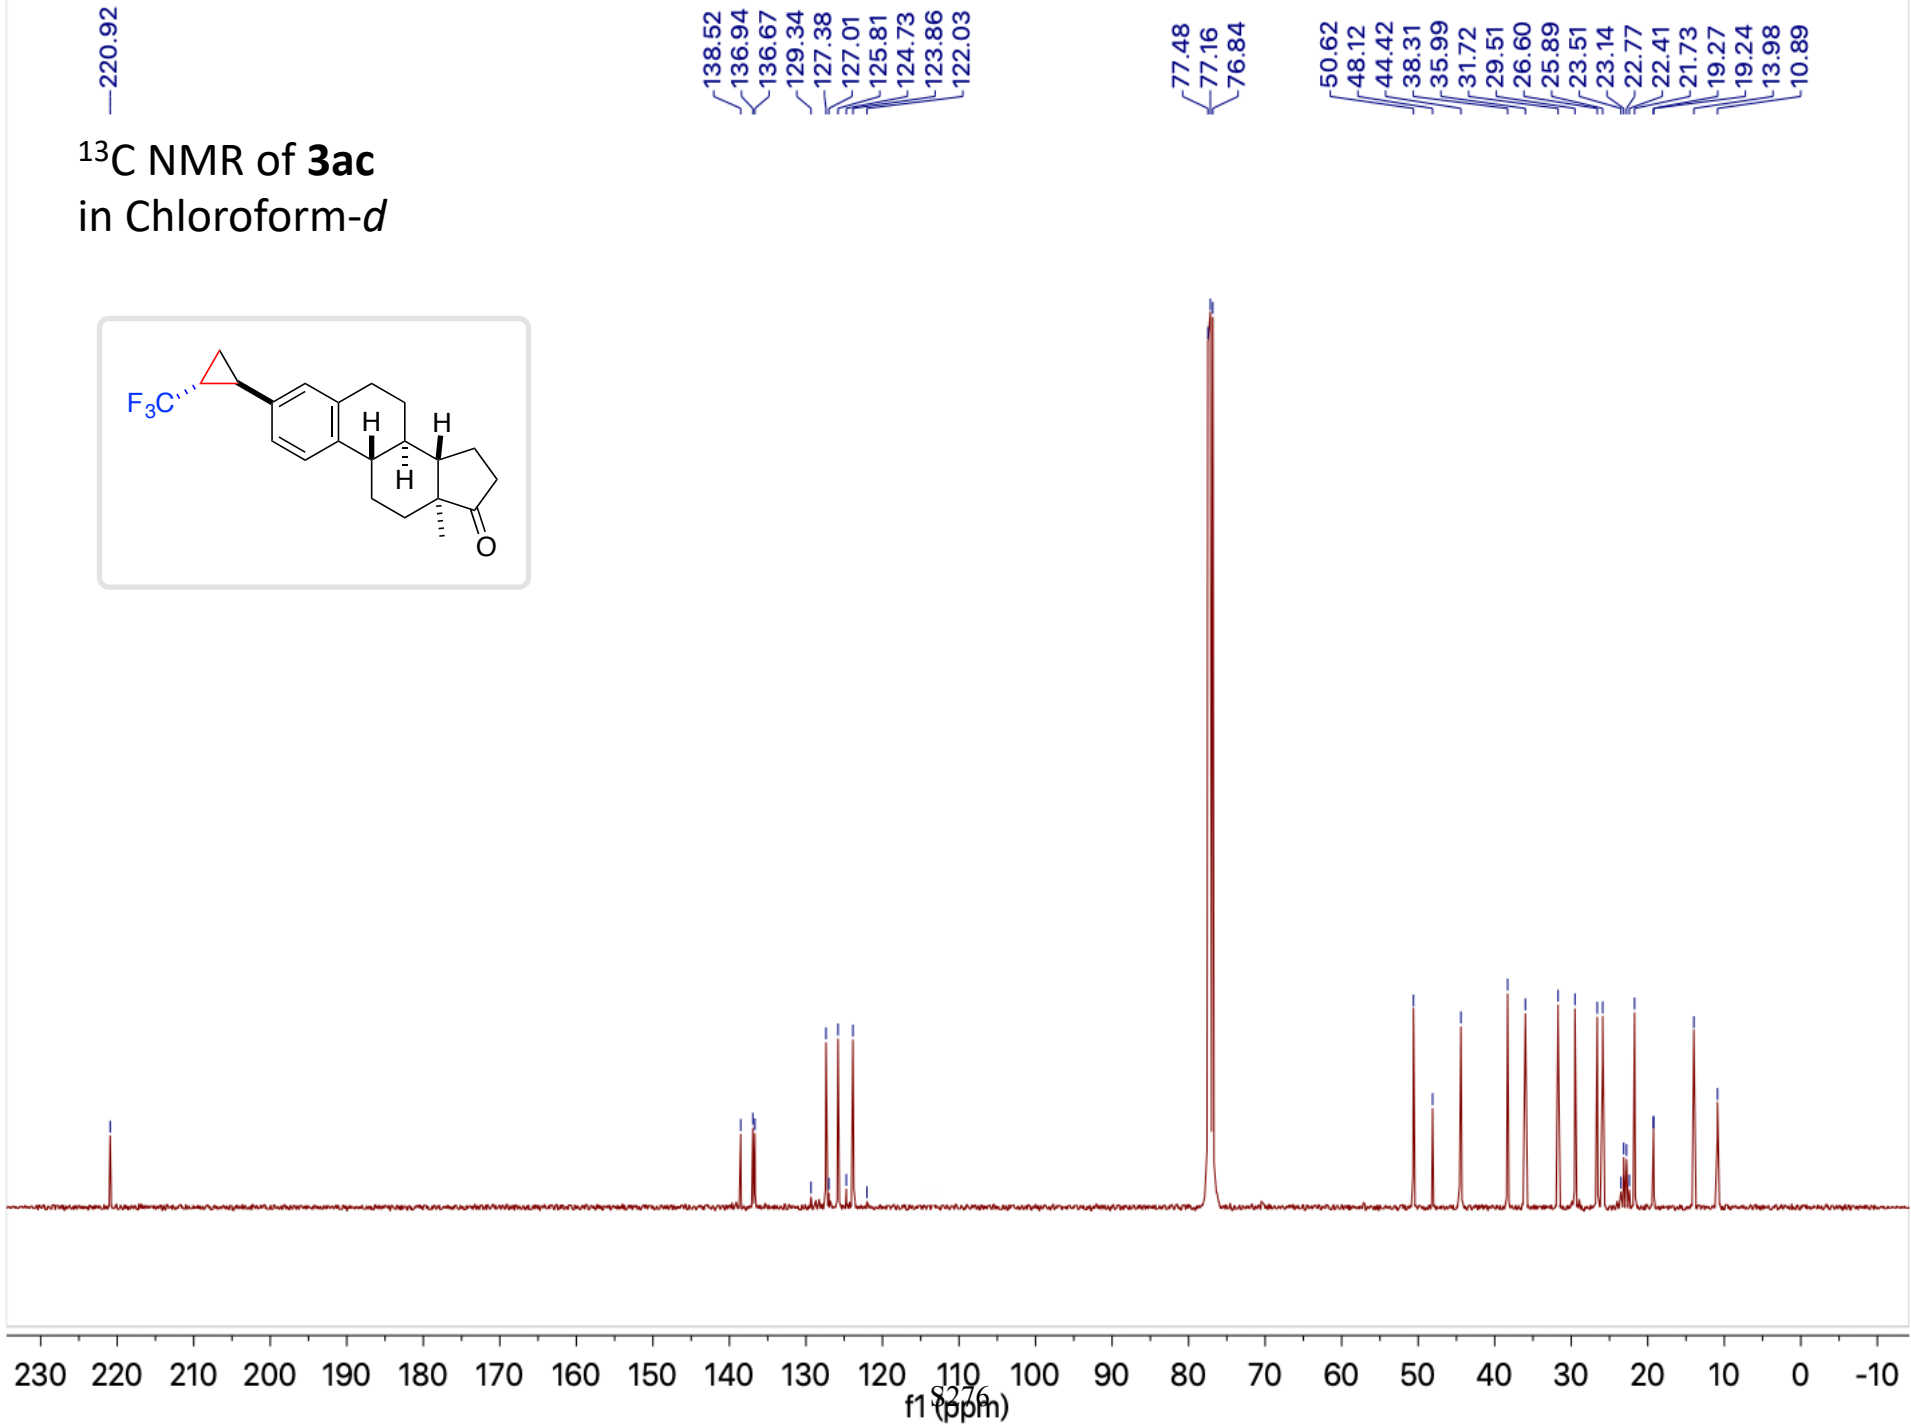

$^{19}\text{F}$  NMR of **3ac**  
in Chloroform-*d*

-66.76  
-66.77

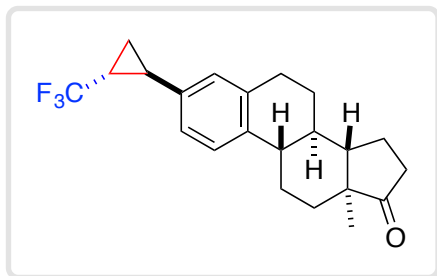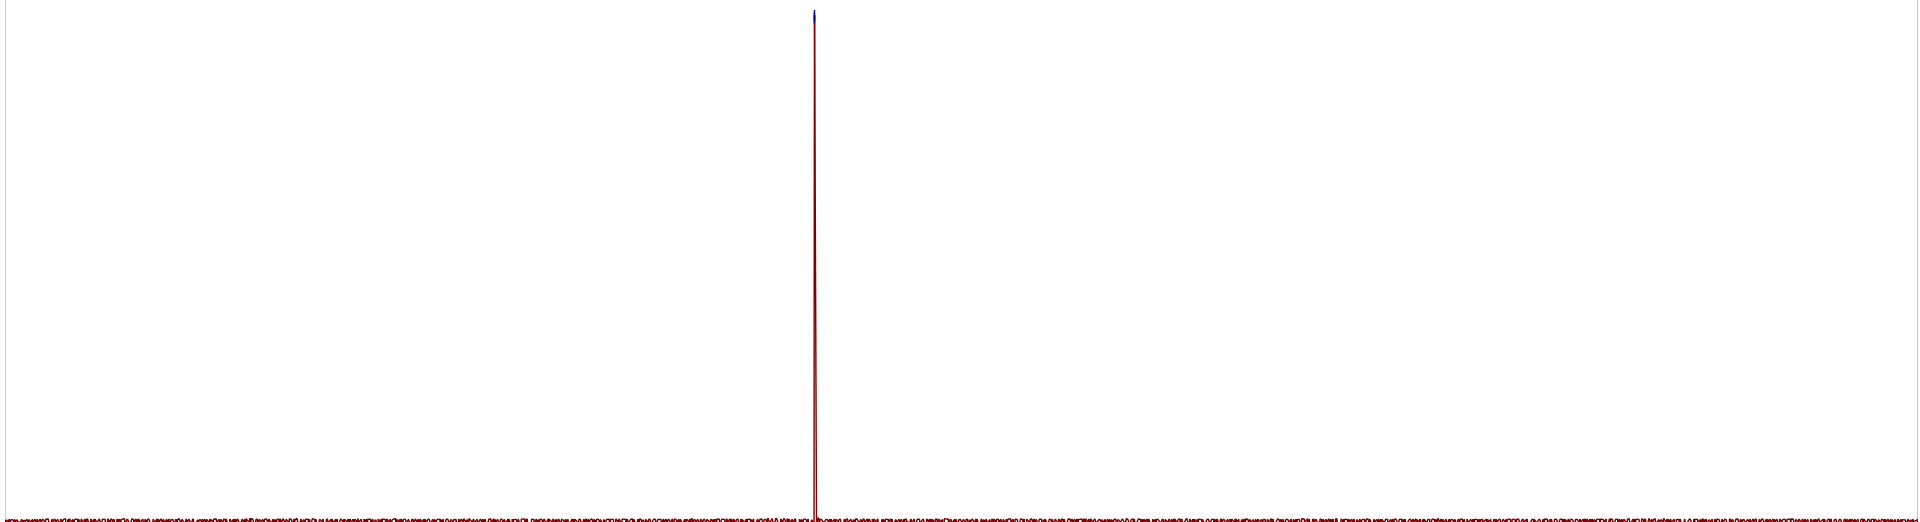

<sup>1</sup>H NMR of **5a**  
in Chloroform-*d*

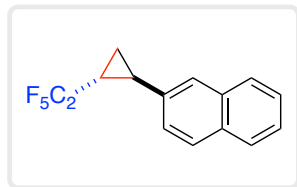

7.82  
7.81  
7.79  
7.77  
7.59  
7.50  
7.48  
7.47  
7.45  
7.44  
7.27  
7.26 CDCl<sub>3</sub>  
7.25

2.59  
2.58  
2.57  
2.56  
2.55  
1.80  
1.79  
1.78  
1.78  
1.77  
1.76  
1.75  
1.74  
1.72  
1.71  
1.53 H<sub>2</sub>O  
1.50  
1.49  
1.48  
1.47  
1.46  
1.39  
1.37  
1.36  
1.34

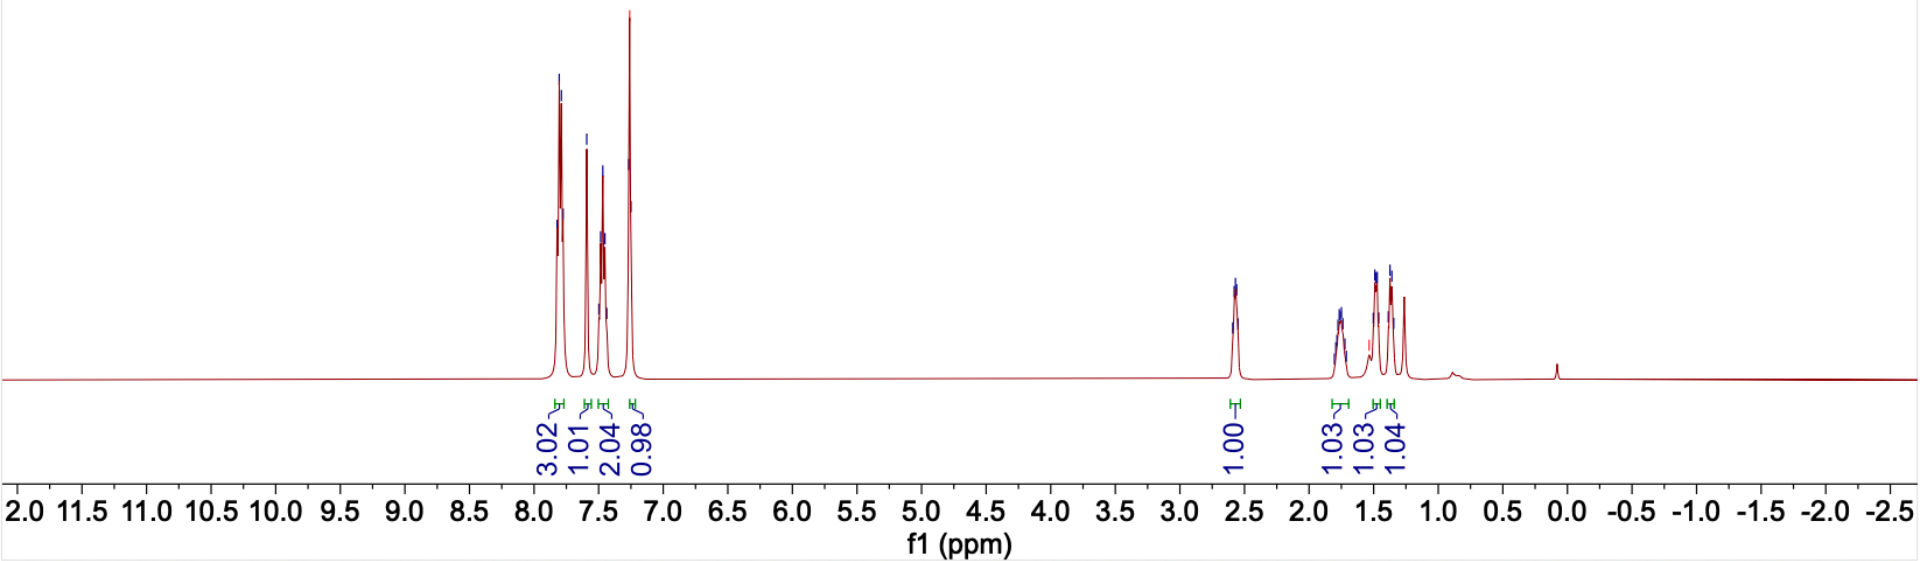

# <sup>13</sup>C NMR of **5a** in Chloroform-*d*

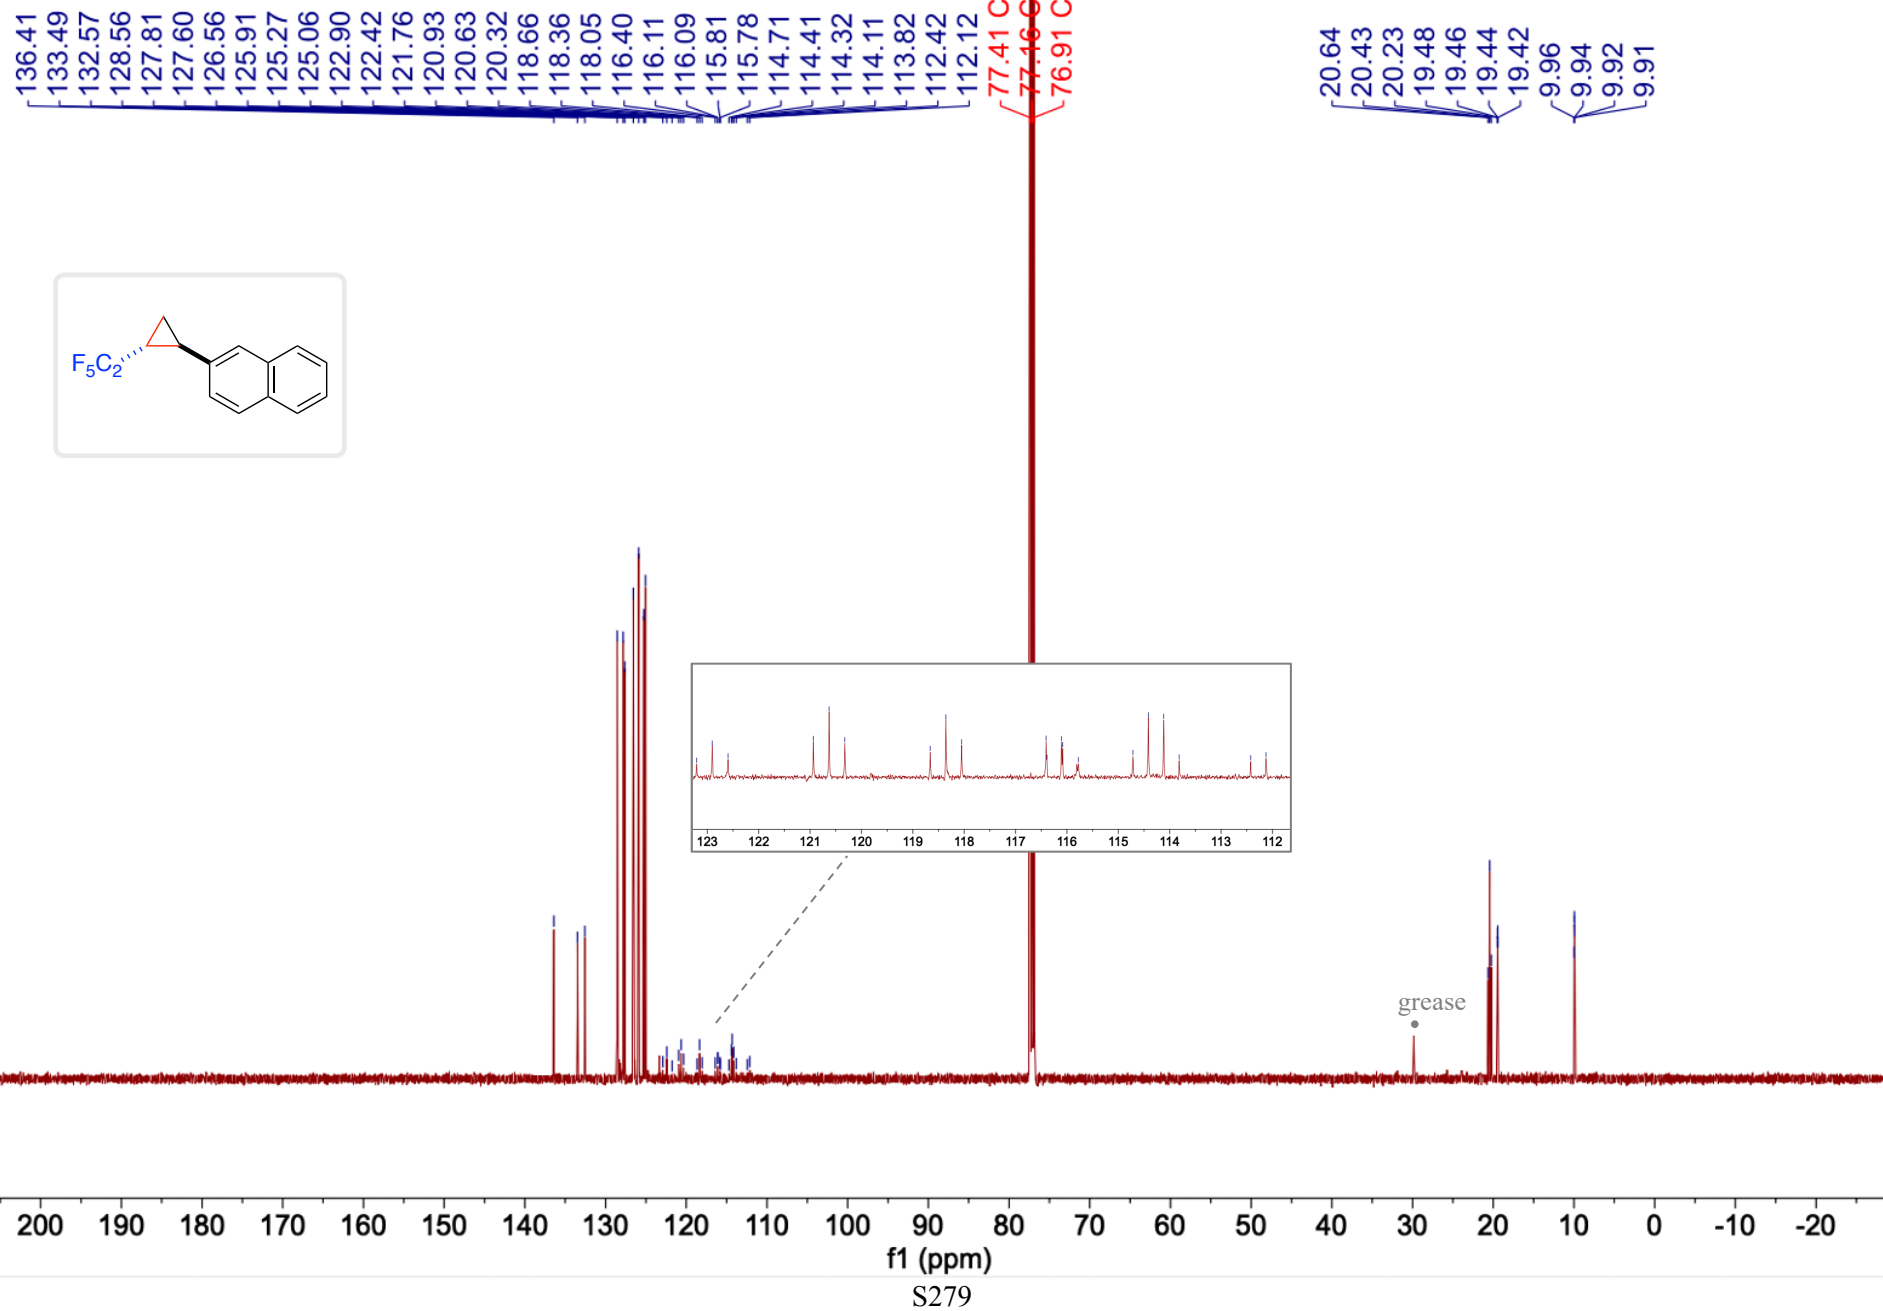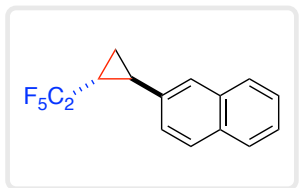



$^{19}\text{F}$  NMR of **5a**  
in Chloroform-*d*

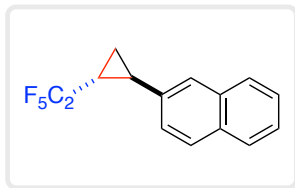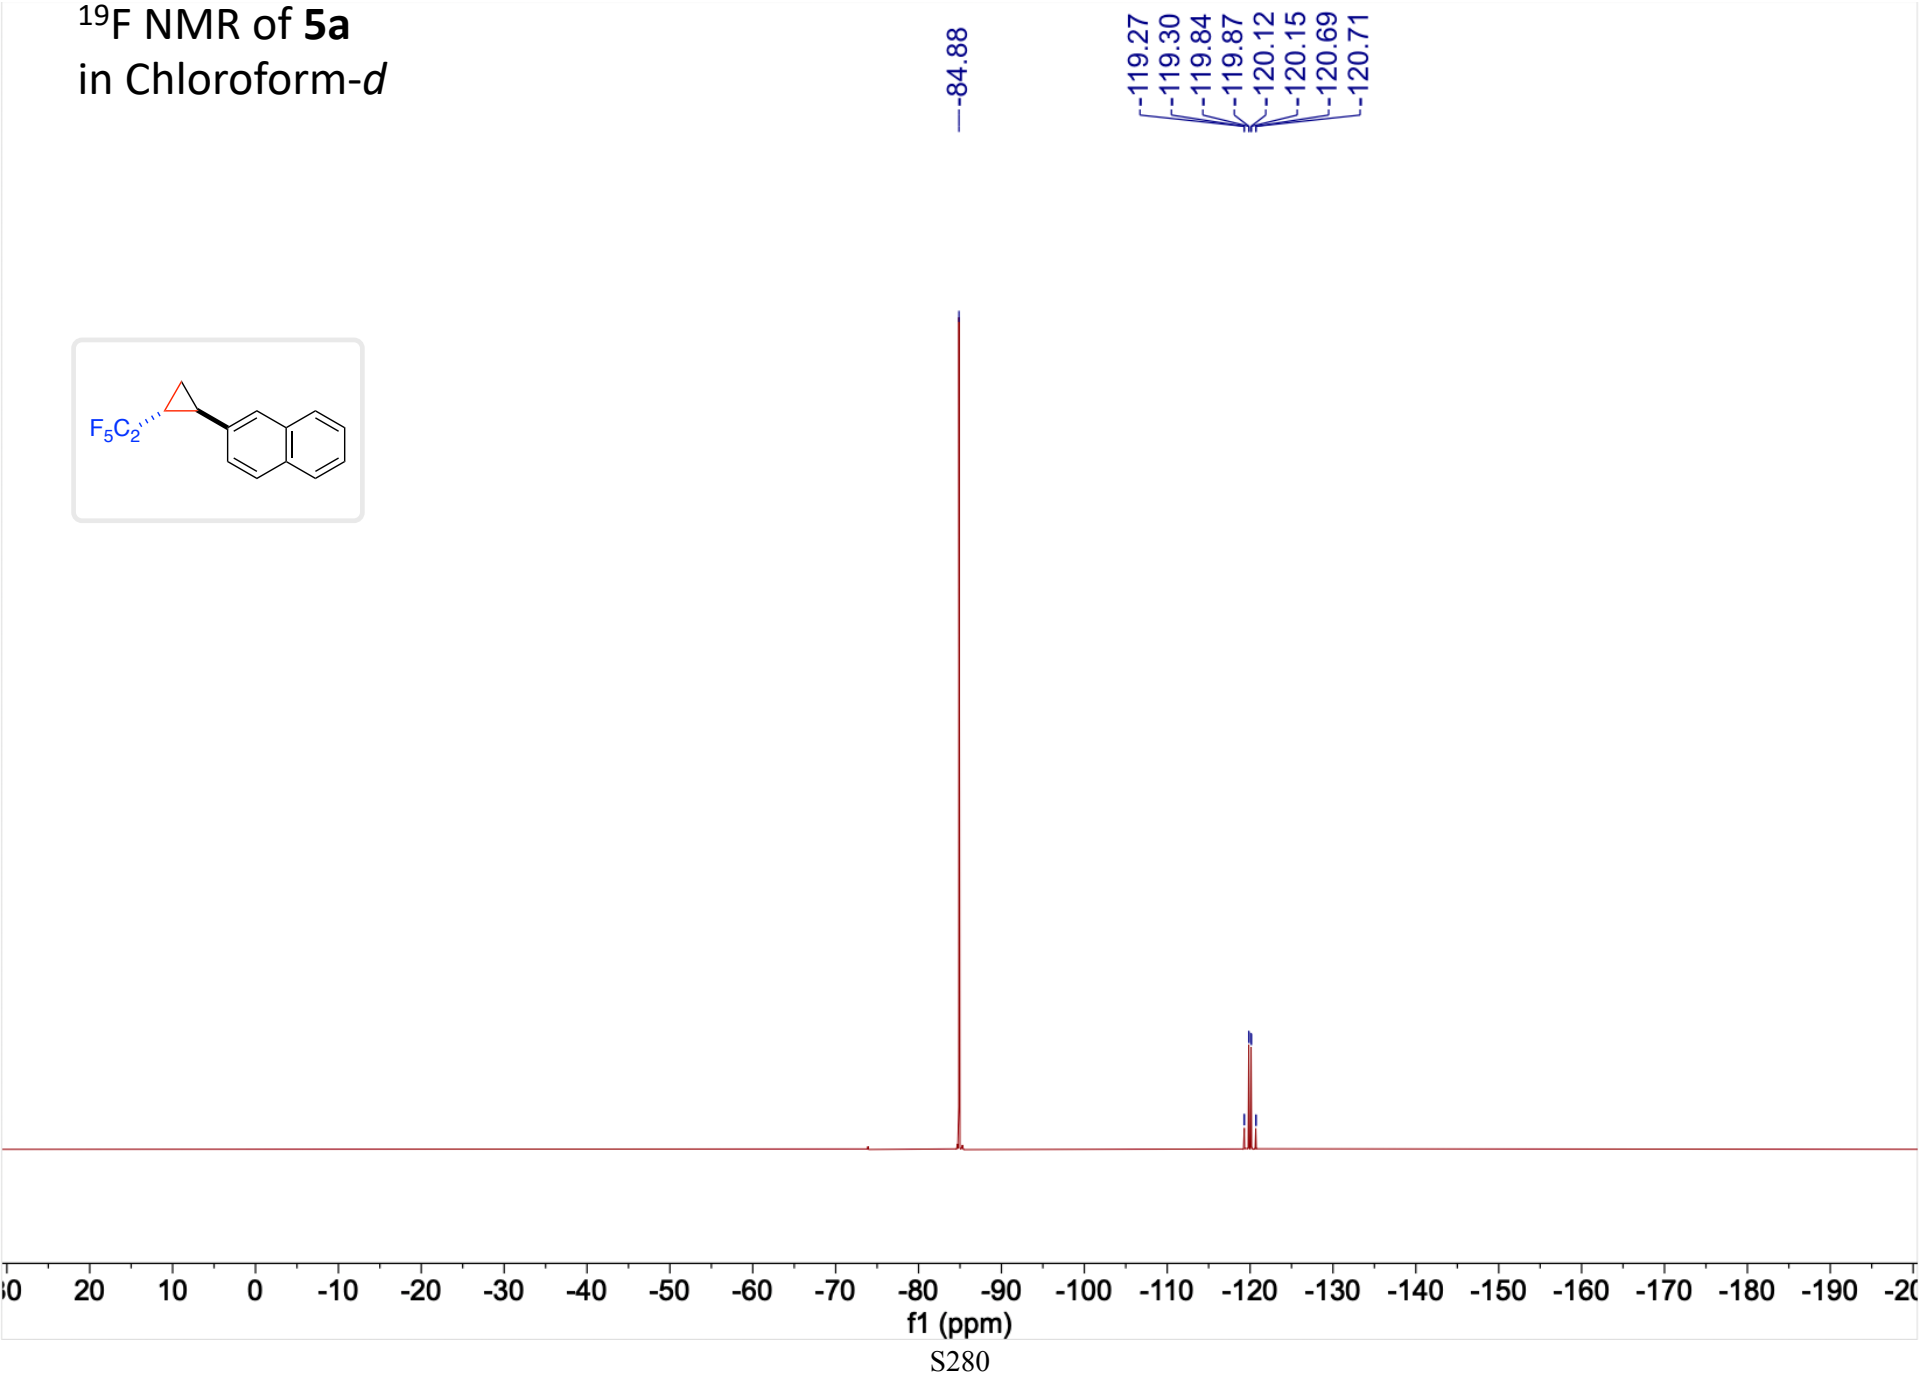

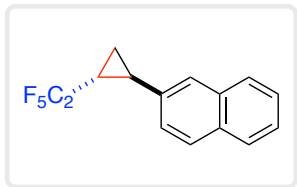

# HPLC of 5a

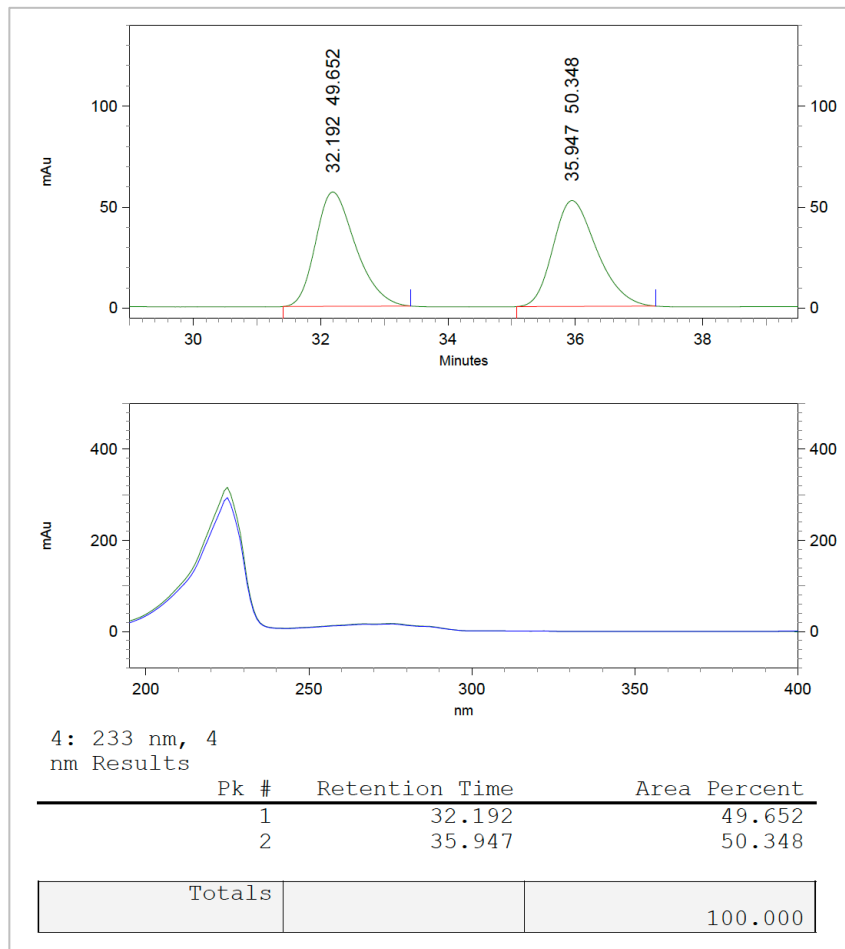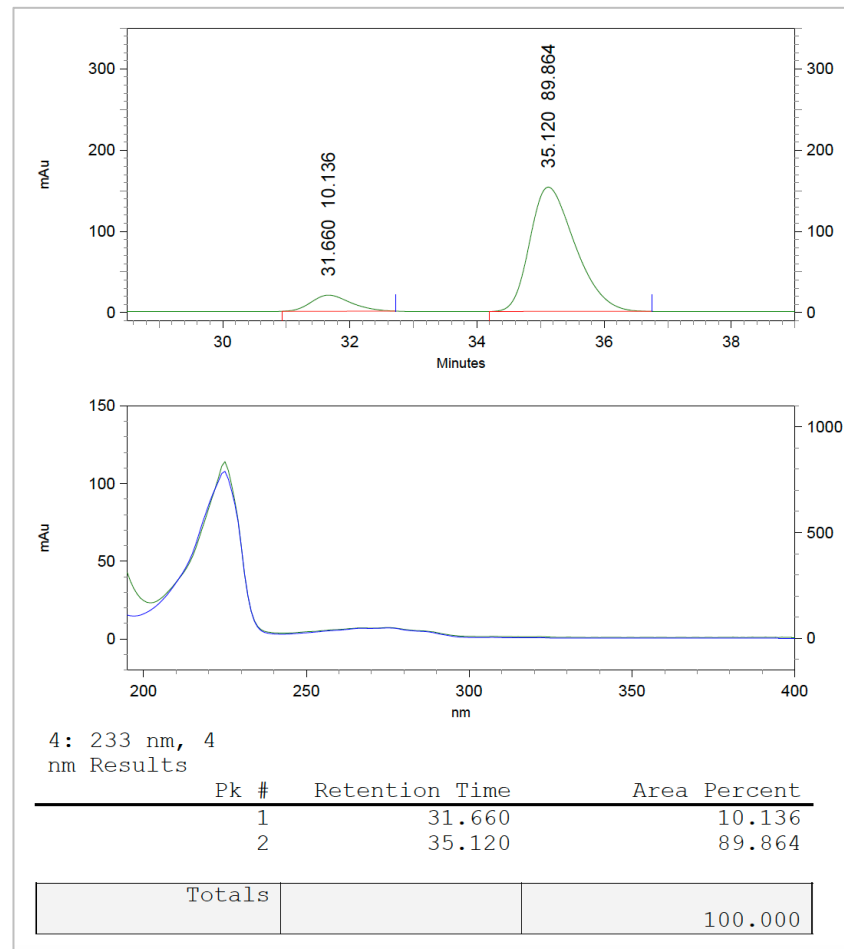

<sup>1</sup>H NMR of **5b**  
in Chloroform-*d*

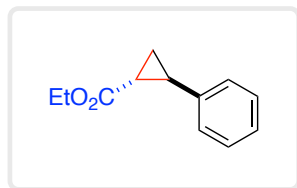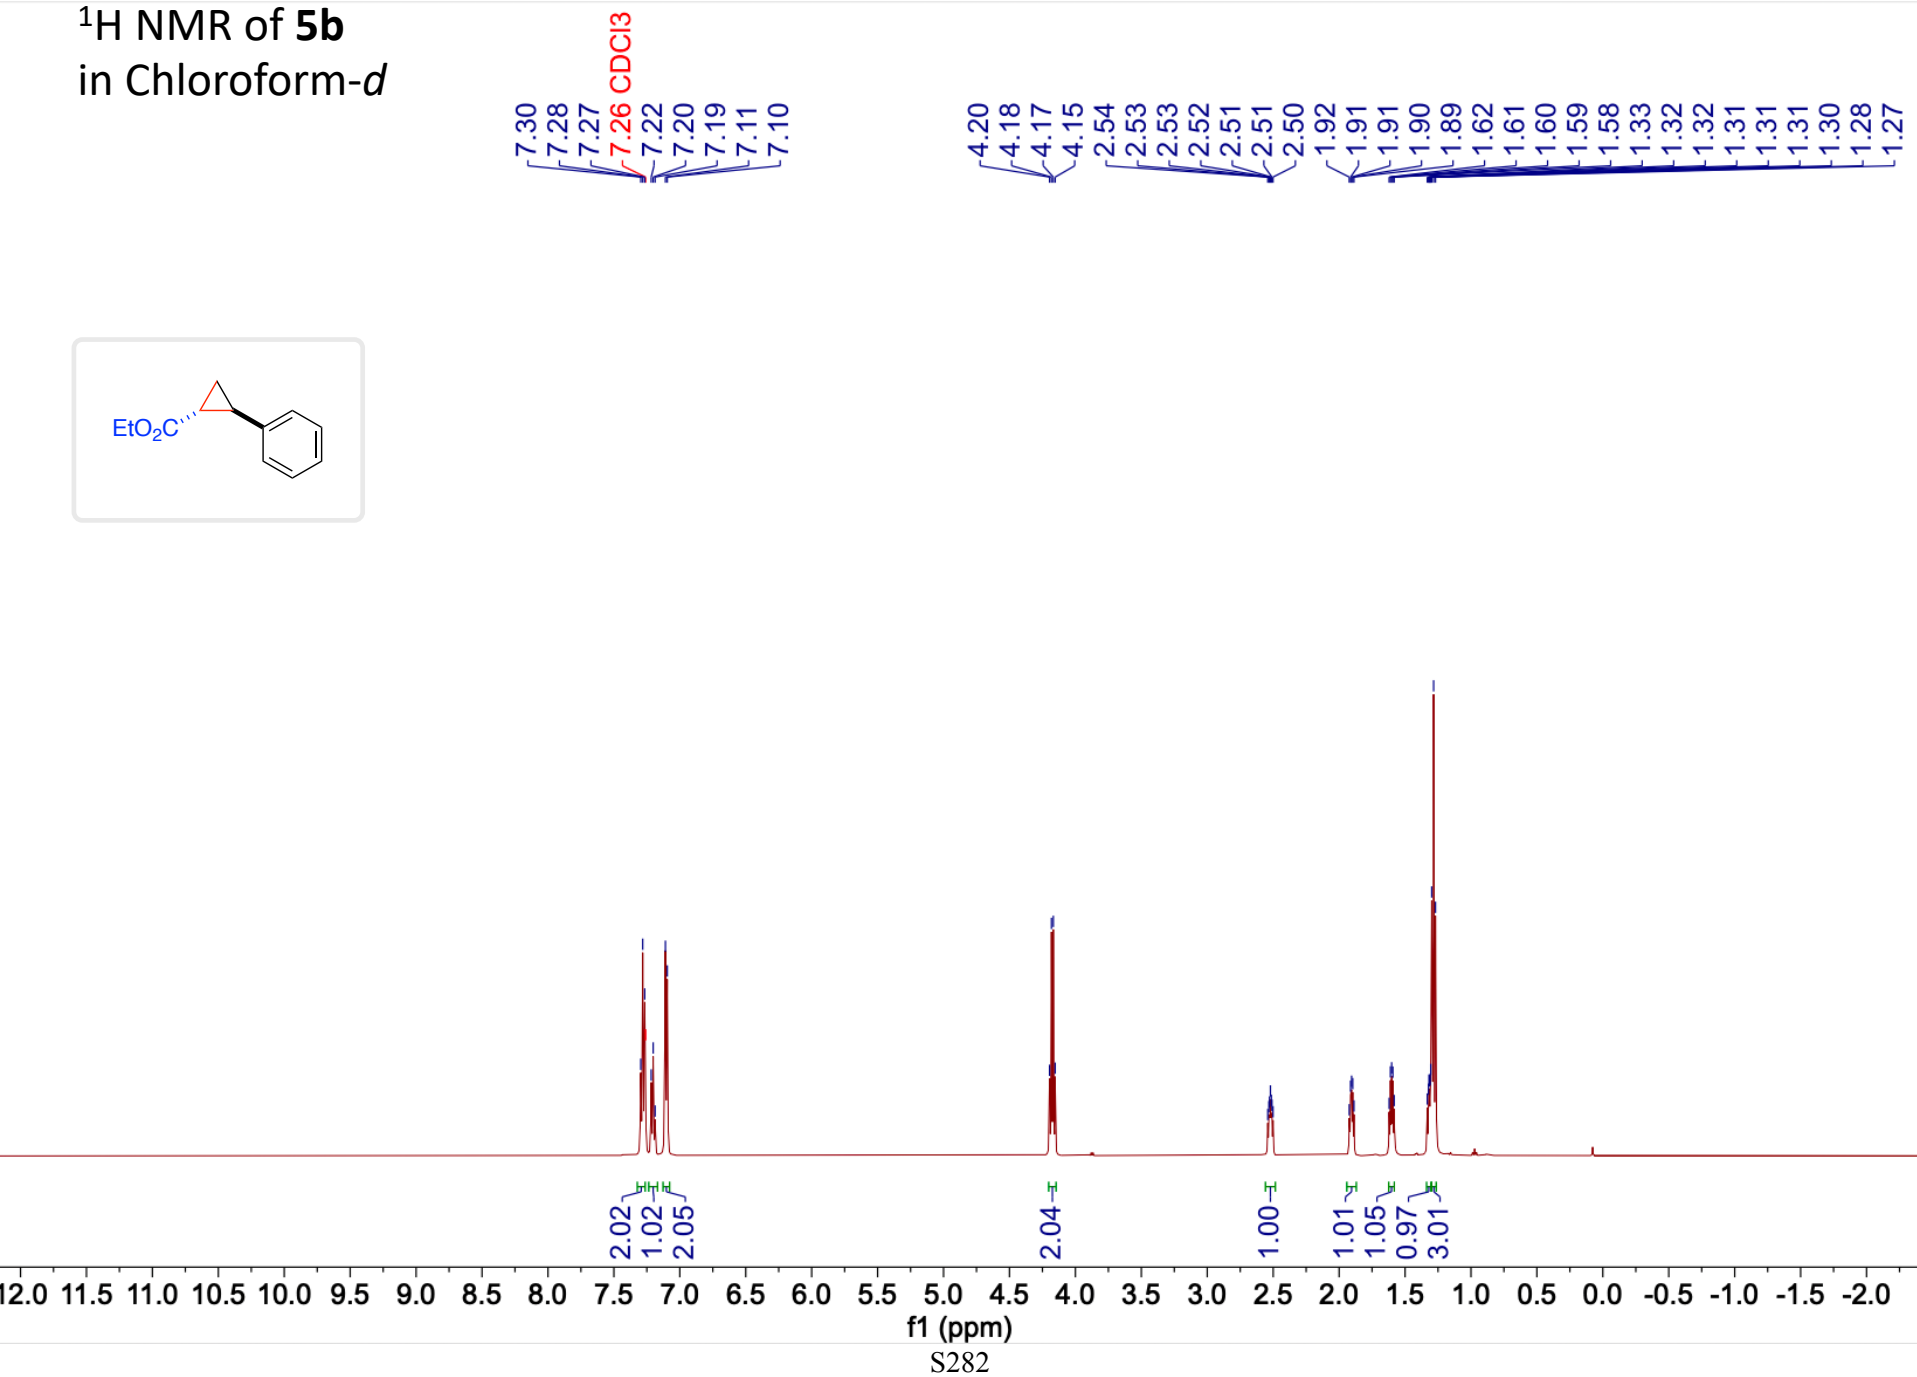

$^{13}\text{C}$  NMR of **5b**  
in Chloroform-*d*

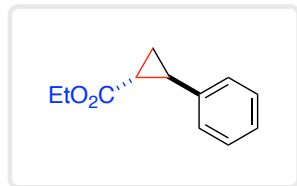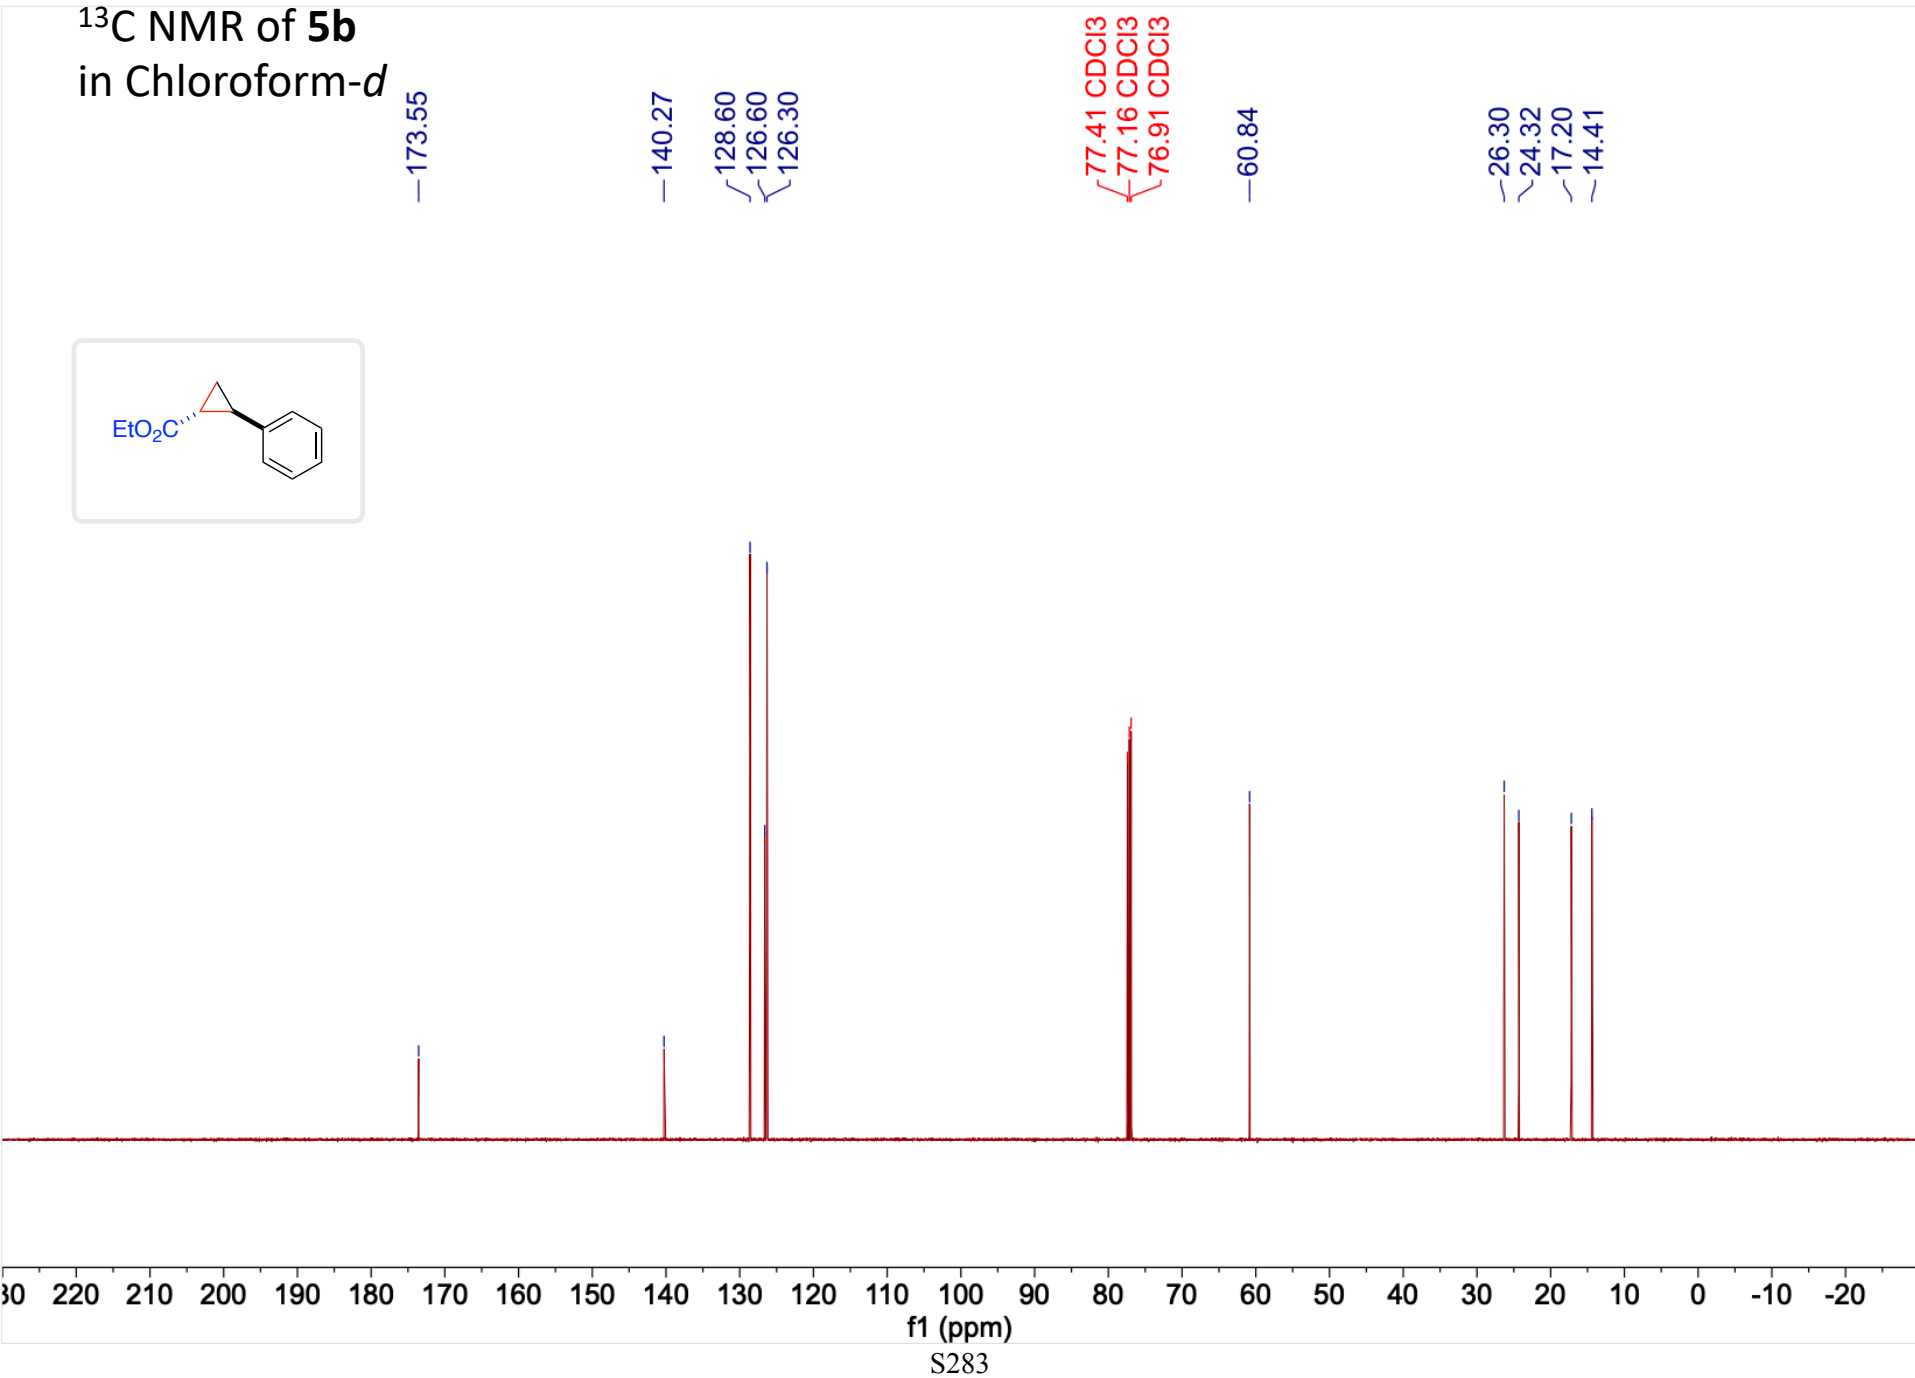

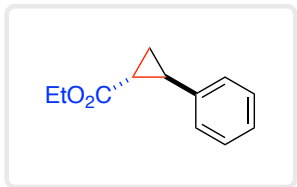

# HPLC of 5b

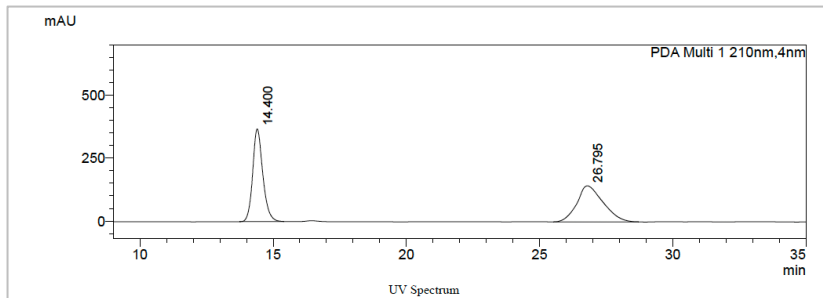

UV Spectrum

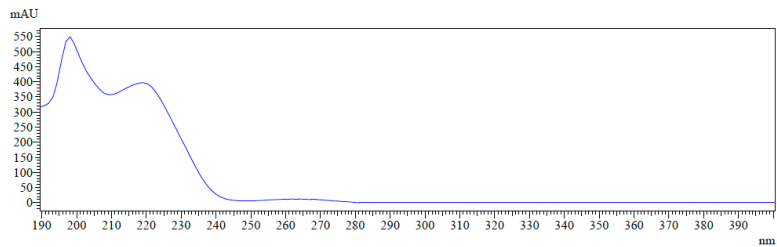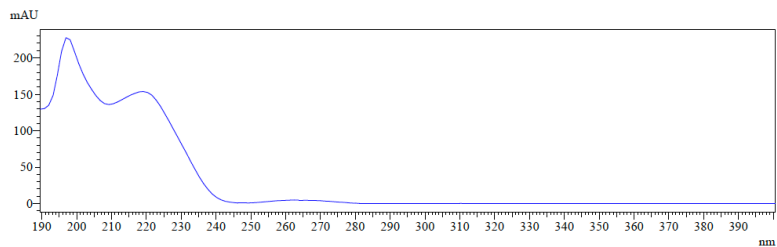

Peak Table  
PDA Ch1 210nm

| Peak# | Ret. Time | Area%   |
|-------|-----------|---------|
| 1     | 14.400    | 49.685  |
| 2     | 26.795    | 50.315  |
| Total |           | 100.000 |

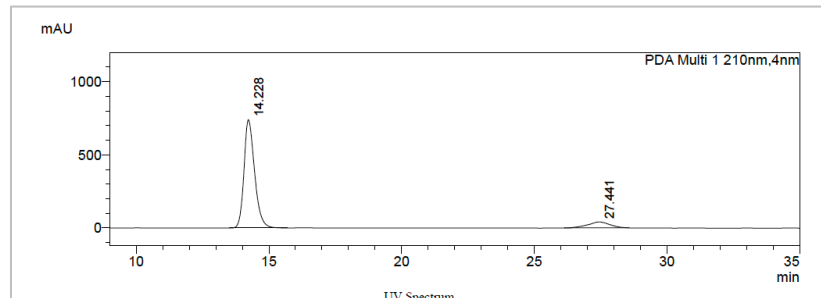

UV Spectrum

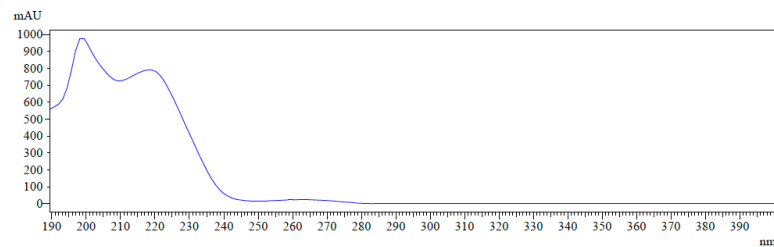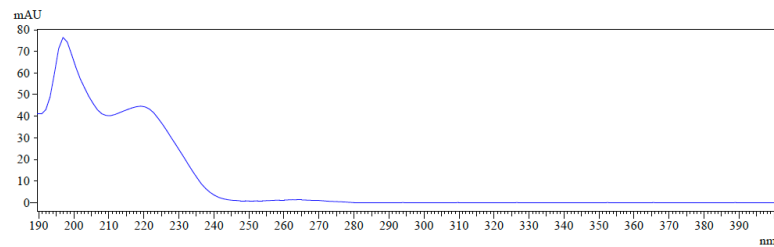

Peak Table  
PDA Ch1 210nm

| Peak# | Ret. Time | Area%   |
|-------|-----------|---------|
| 1     | 14.228    | 89.820  |
| 2     | 27.441    | 10.180  |
| Total |           | 100.000 |

$^1\text{H}$  NMR of **5c**  
in Chloroform-*d*

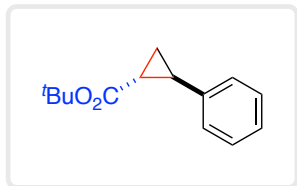

7.29  
7.28  
7.26 CDCl<sub>3</sub>  
7.21  
7.19  
7.18  
7.10  
7.08

2.46  
2.45  
2.45  
2.44  
2.43  
2.43  
2.42  
1.85  
1.84  
1.84  
1.83  
1.82  
1.55  
1.54  
1.53  
1.52  
1.51  
1.47  
1.26  
1.25  
1.24  
1.24  
1.24  
1.23  
1.23  
1.22  
1.21

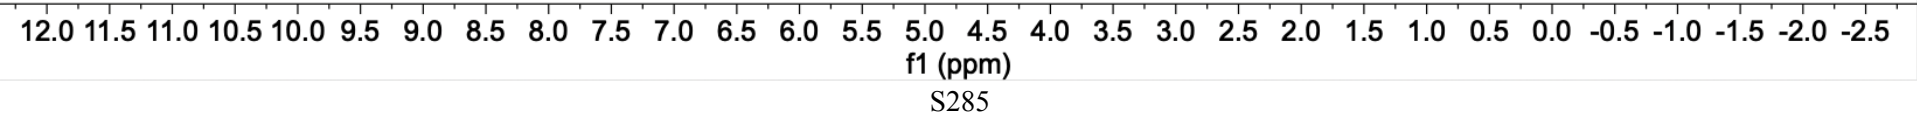

$^{13}\text{C}$  NMR of **5c**  
in Chloroform-*d*

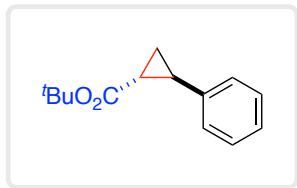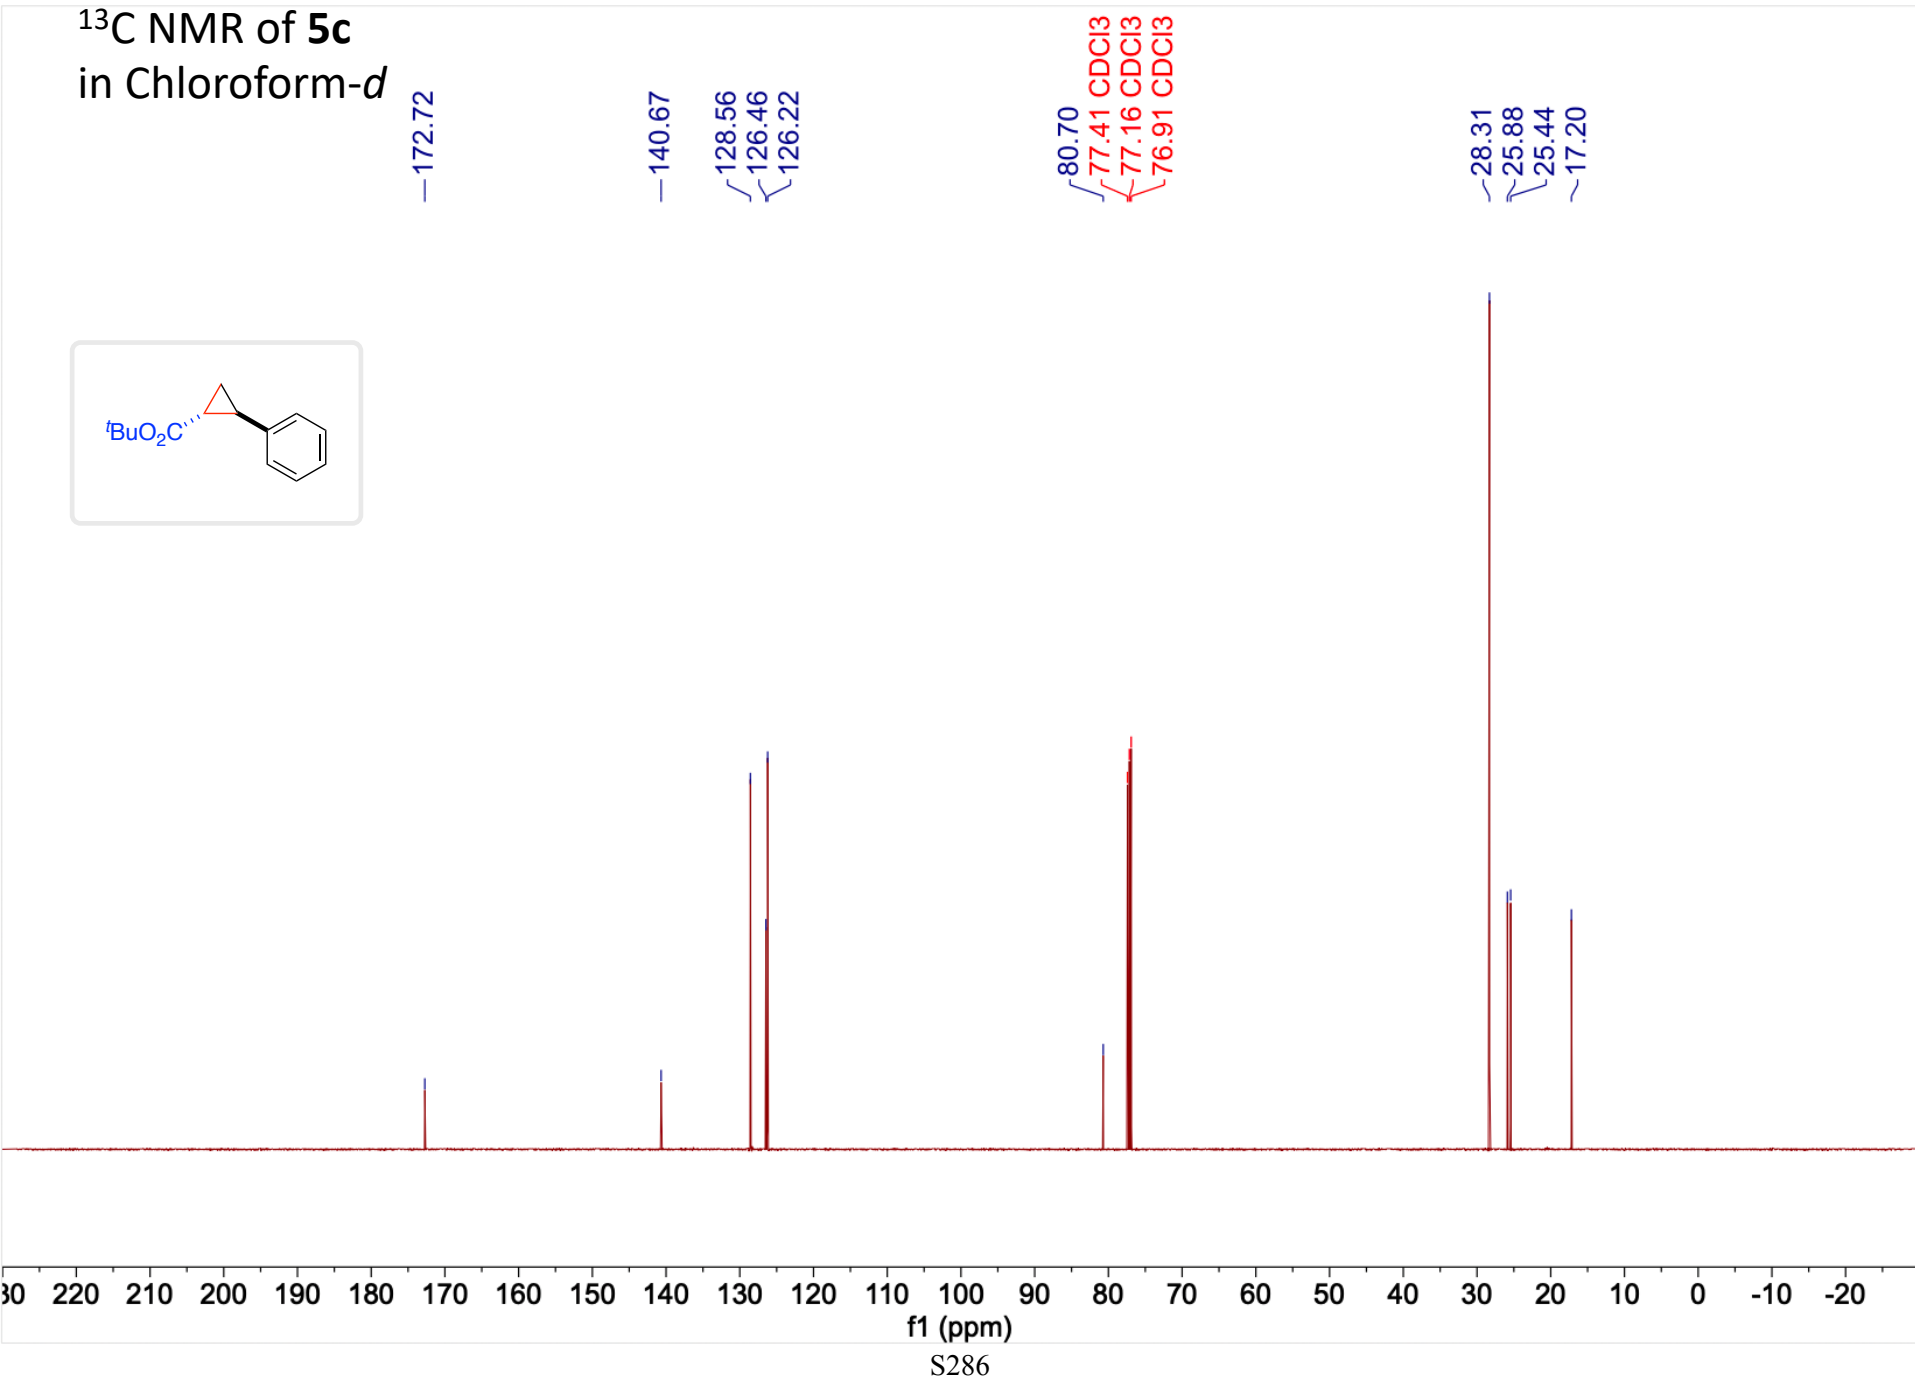

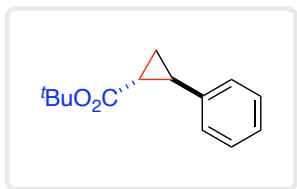

# HPLC of 5c

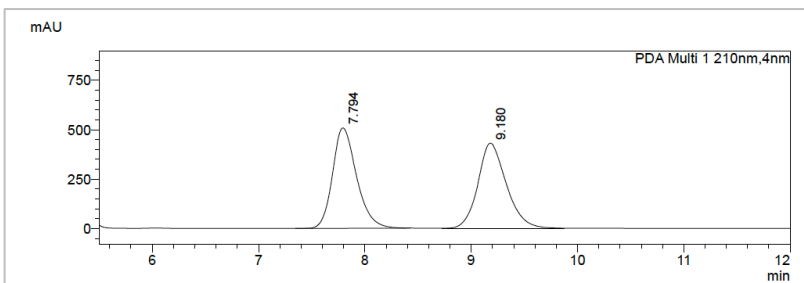

UV Spectrum

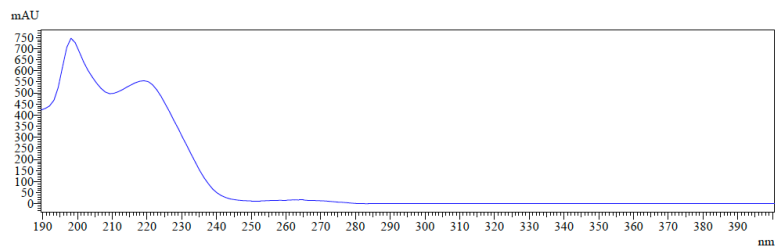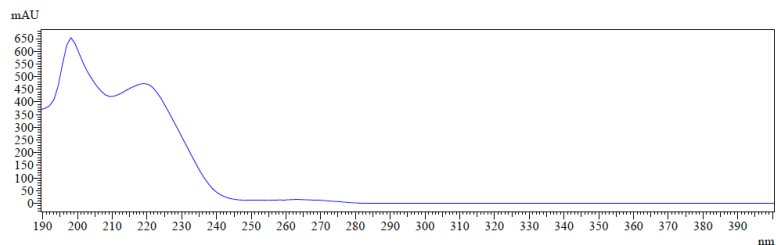

Peak Table  
PDA Ch1 210nm

| Peak# | Ret. Time | Area%   |
|-------|-----------|---------|
| 1     | 7.794     | 50.043  |
| 2     | 9.180     | 49.957  |
| Total |           | 100.000 |

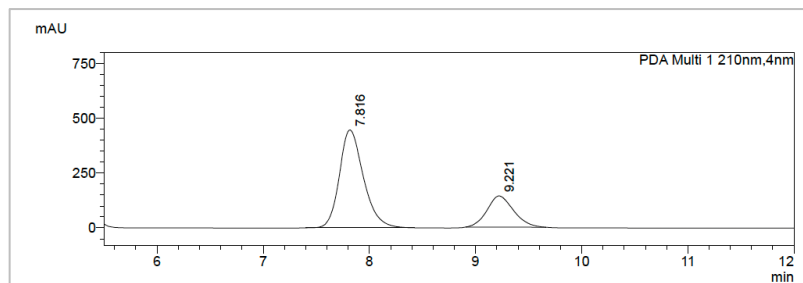

UV Spectrum

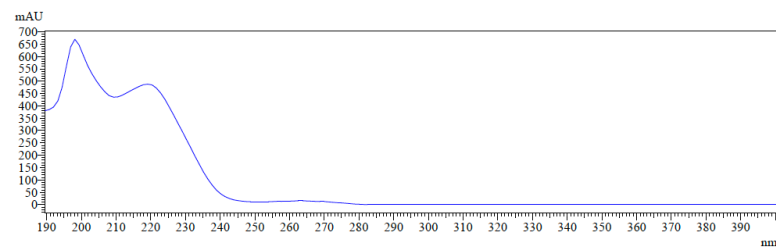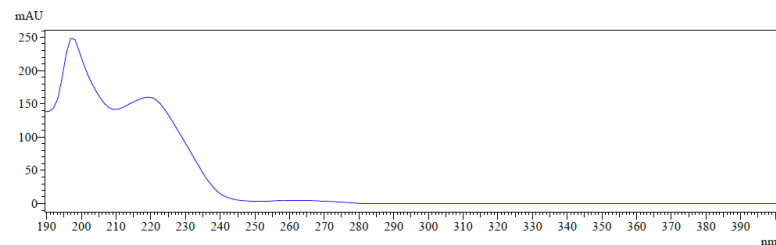

Peak Table  
PDA Ch1 210nm

| Peak# | Ret. Time | Area%   |
|-------|-----------|---------|
| 1     | 7.816     | 73.899  |
| 2     | 9.221     | 26.101  |
| Total |           | 100.000 |



<sup>1</sup>H NMR of **5d**  
in Chloroform-*d*

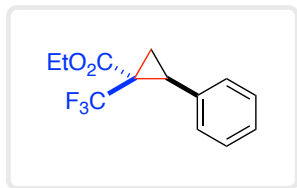

Another set belongs to diastereomer (•)

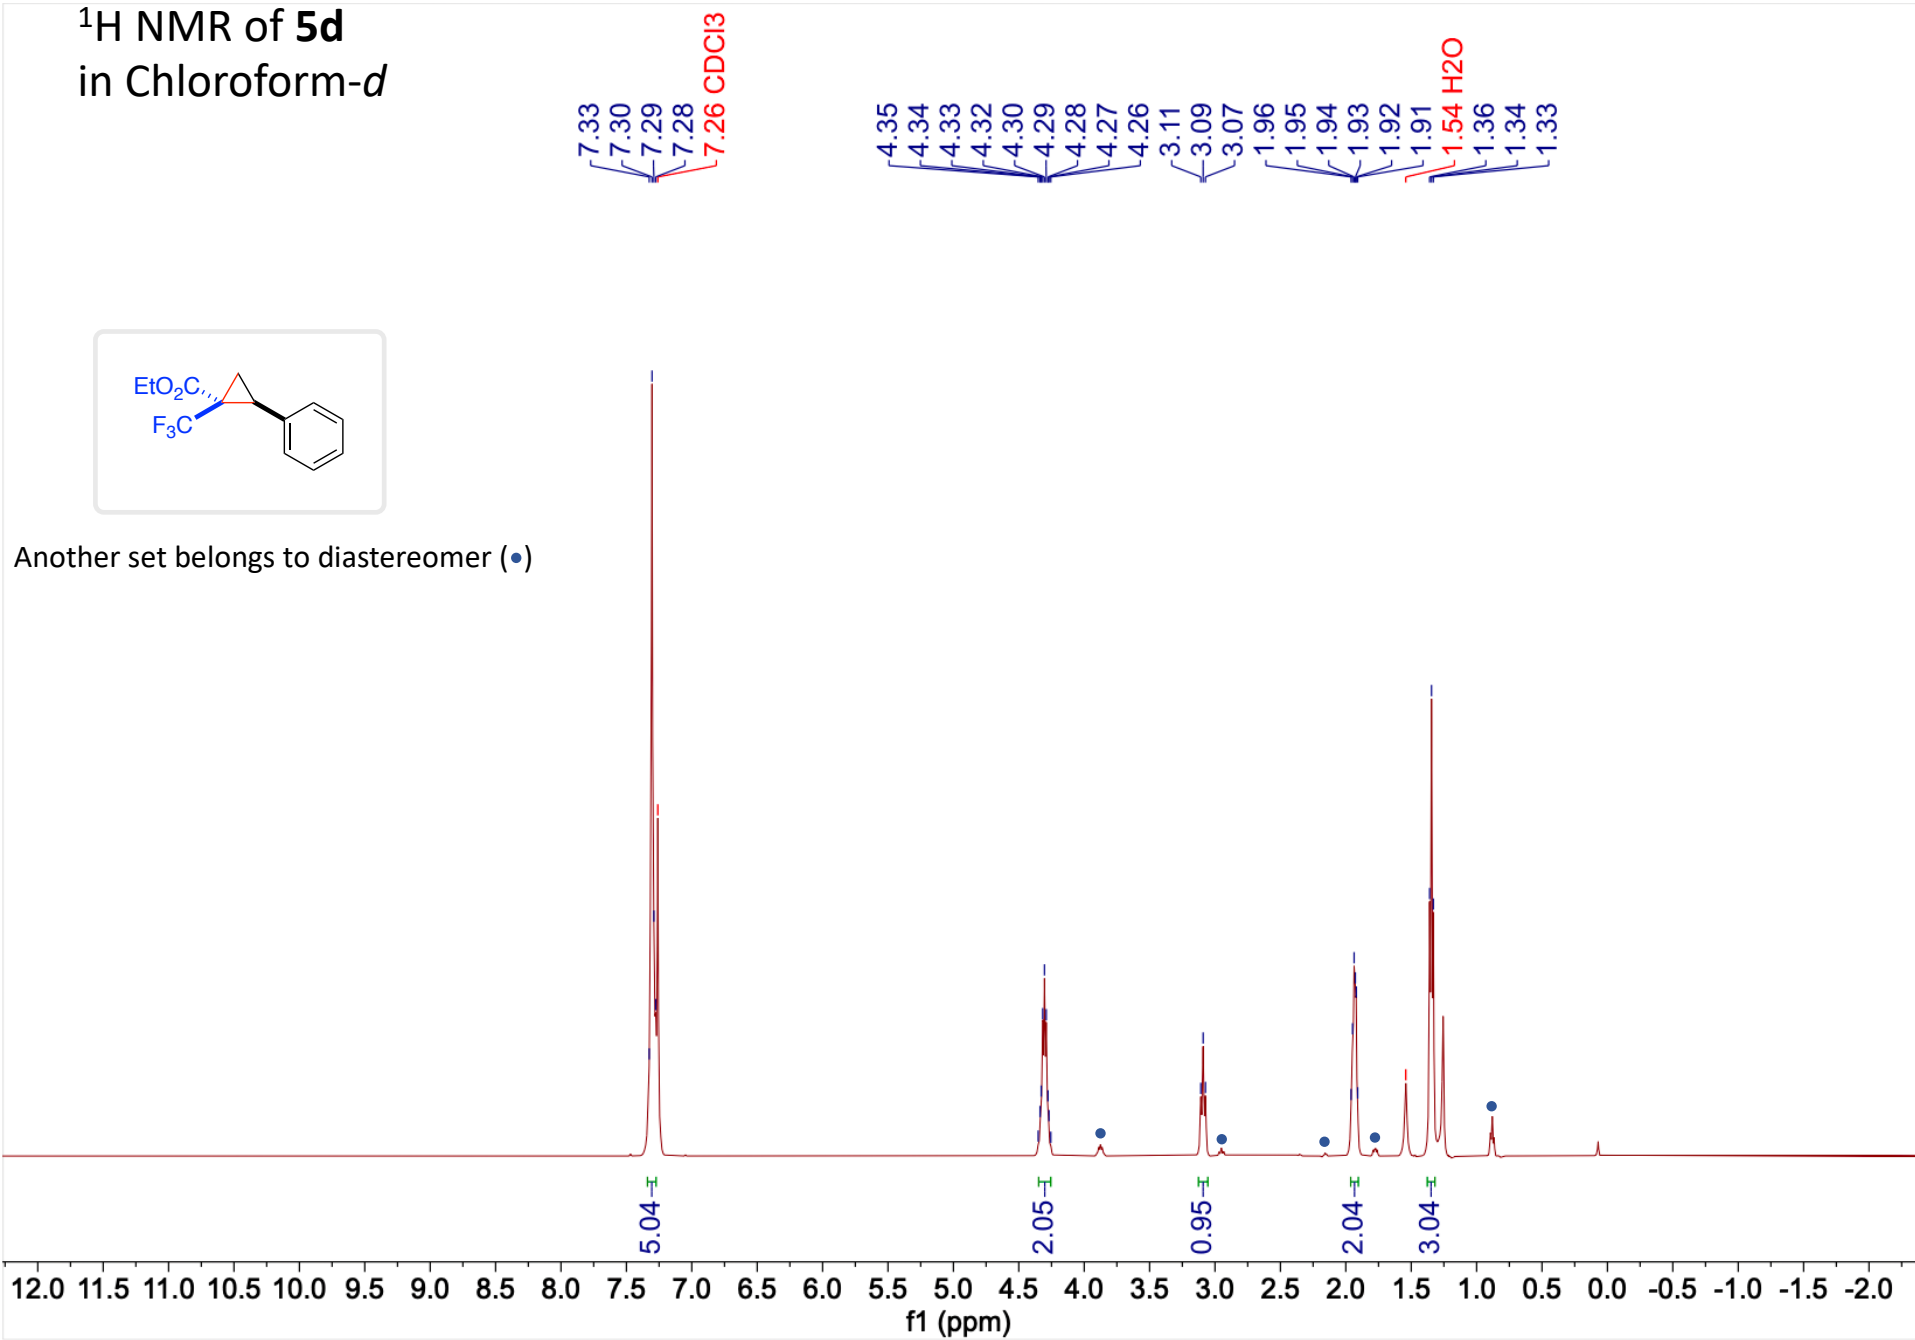

$^{13}\text{C}$  NMR of **5d**  
in Chloroform-*d*

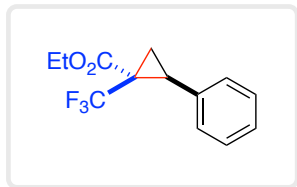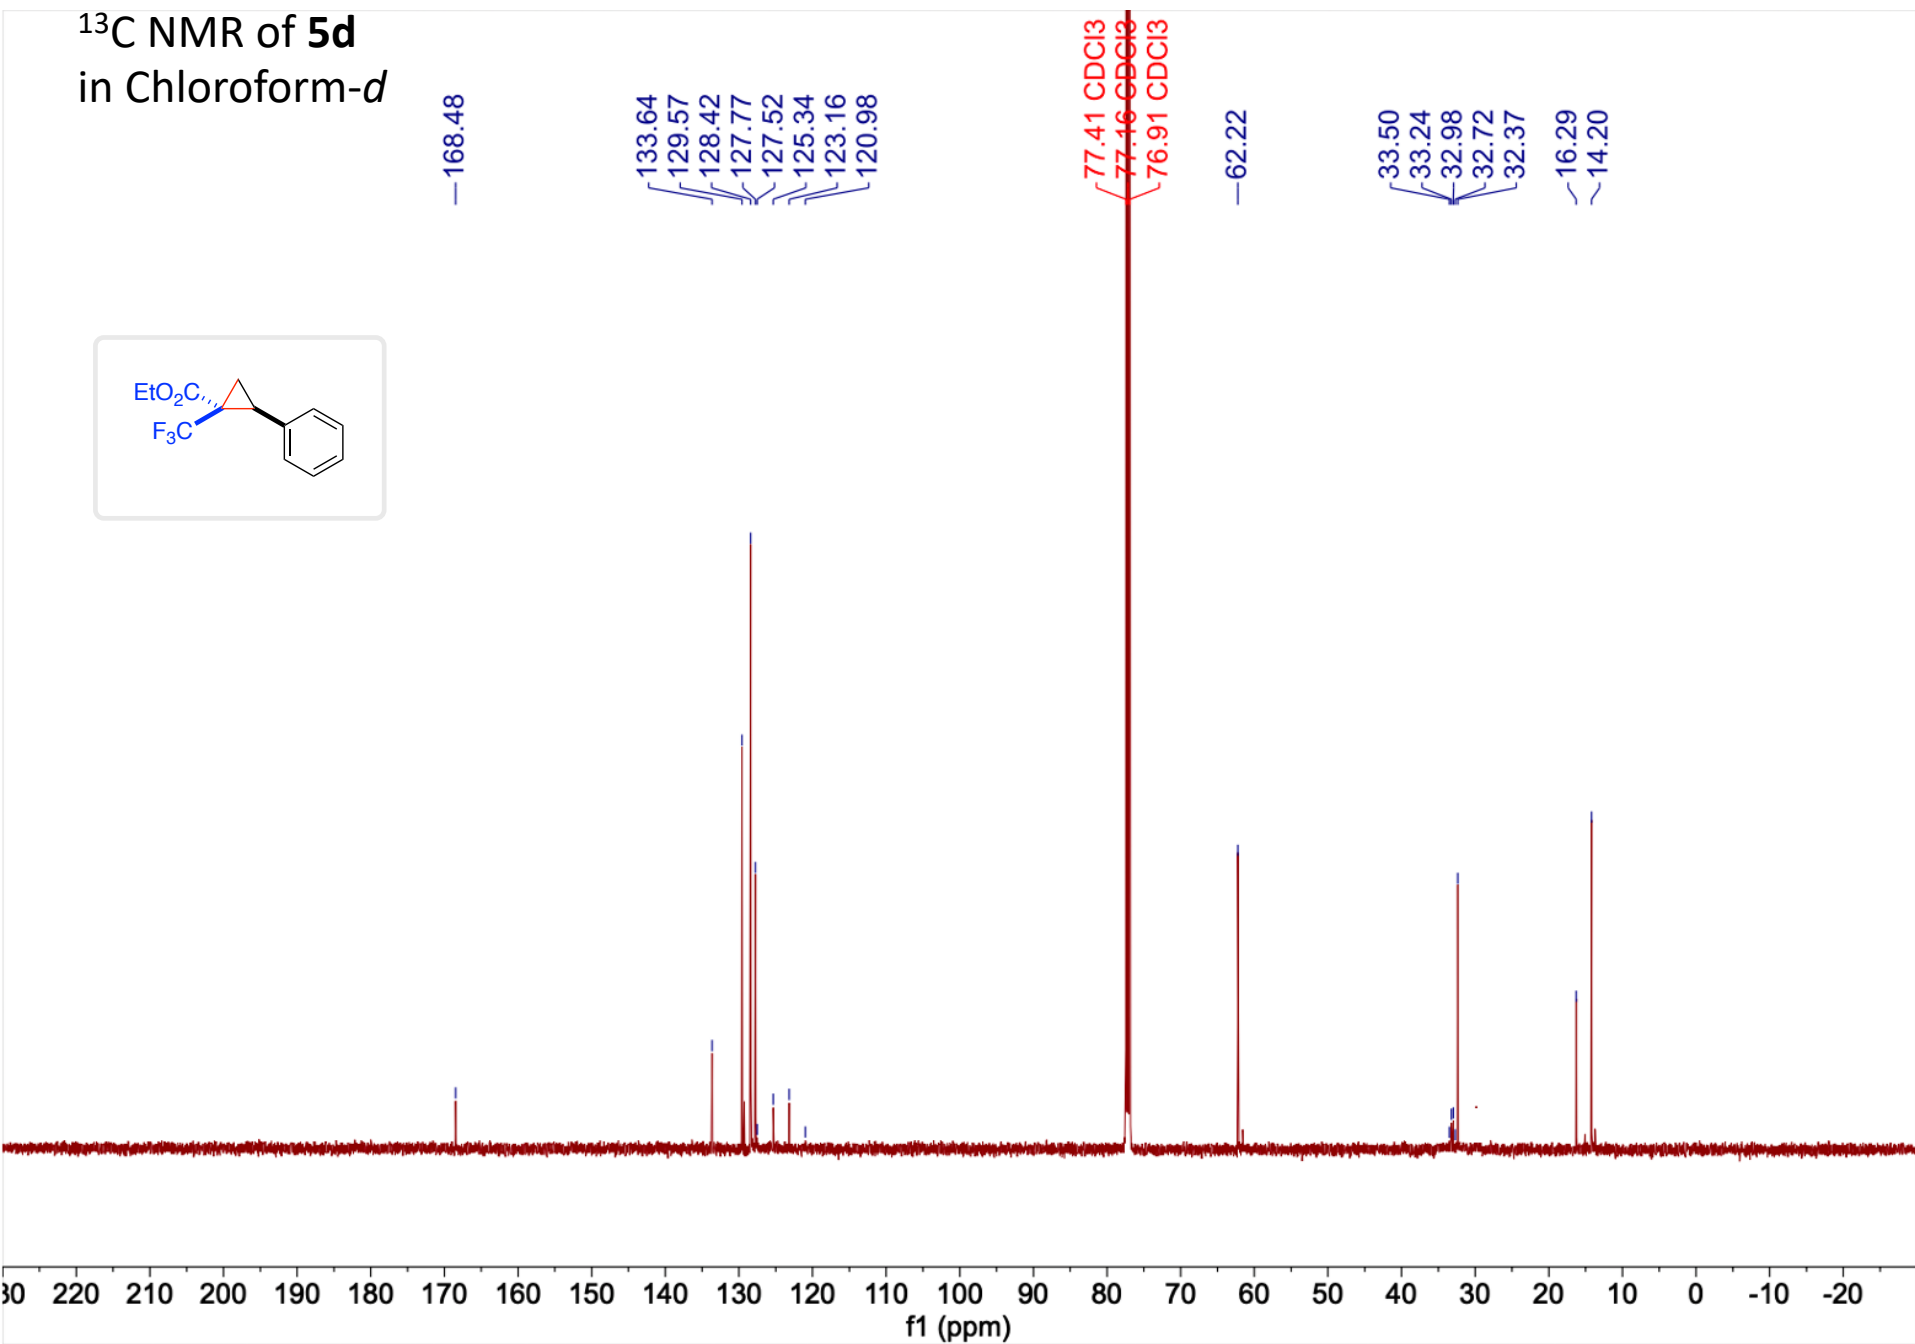

$^{19}\text{F}$  NMR of **5d**  
in Chloroform-*d*

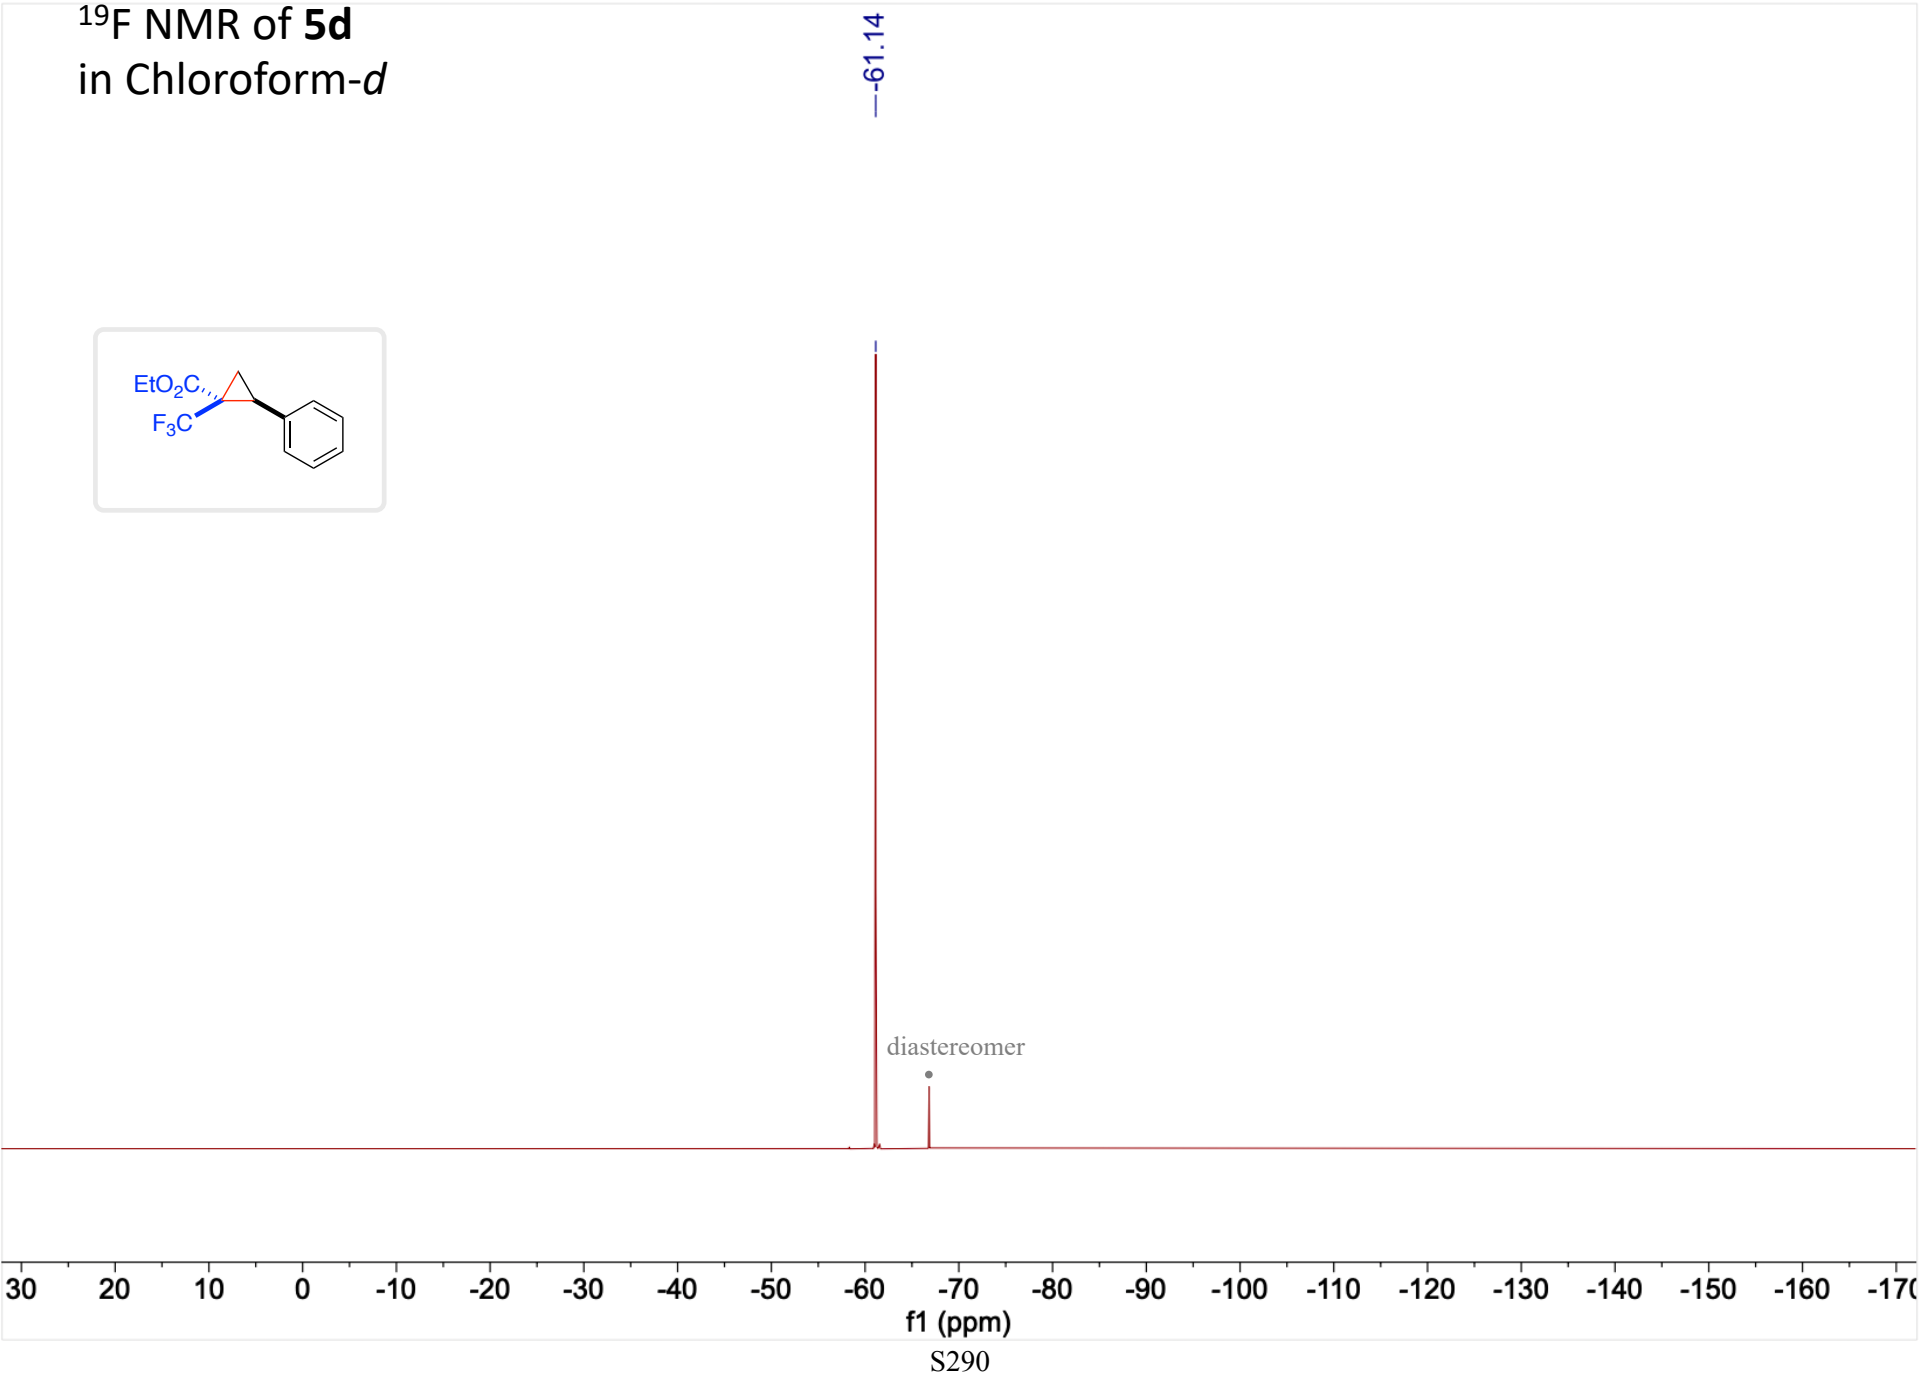

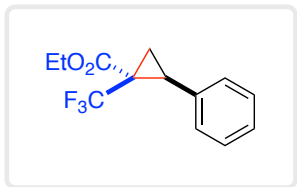

# HPLC of 5d

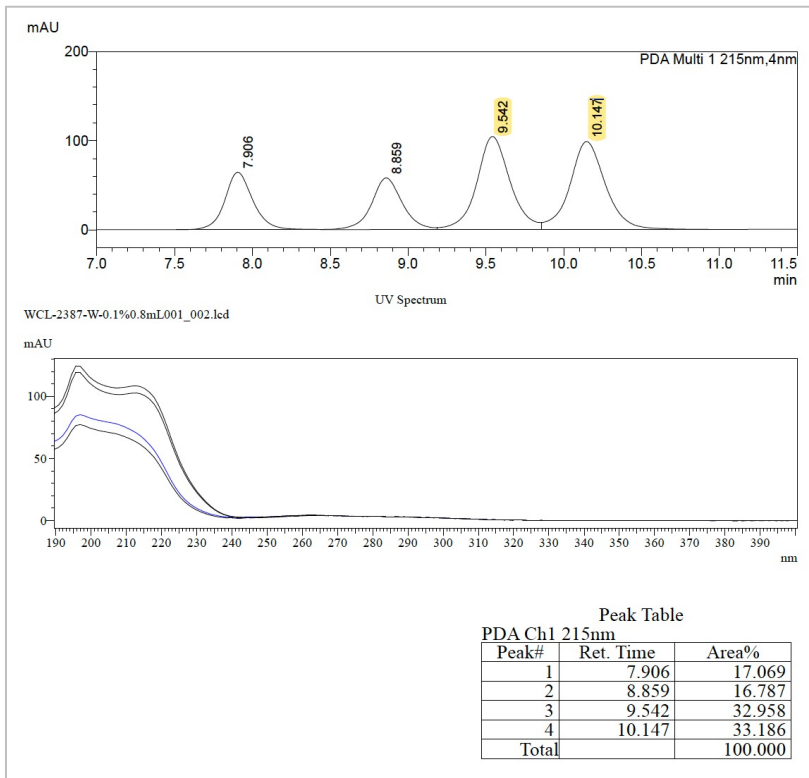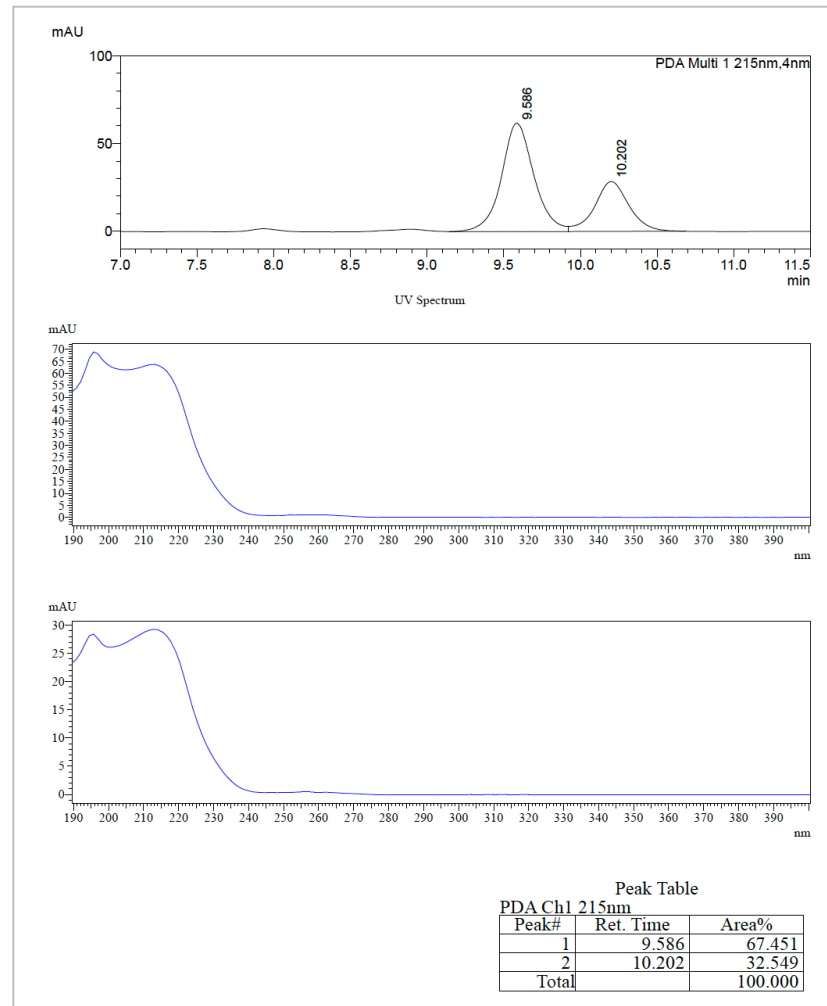

# <sup>1</sup>H NMR of **5e** in Chloroform-*d*

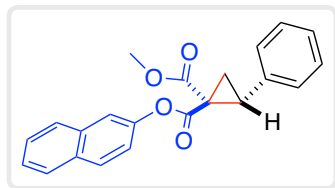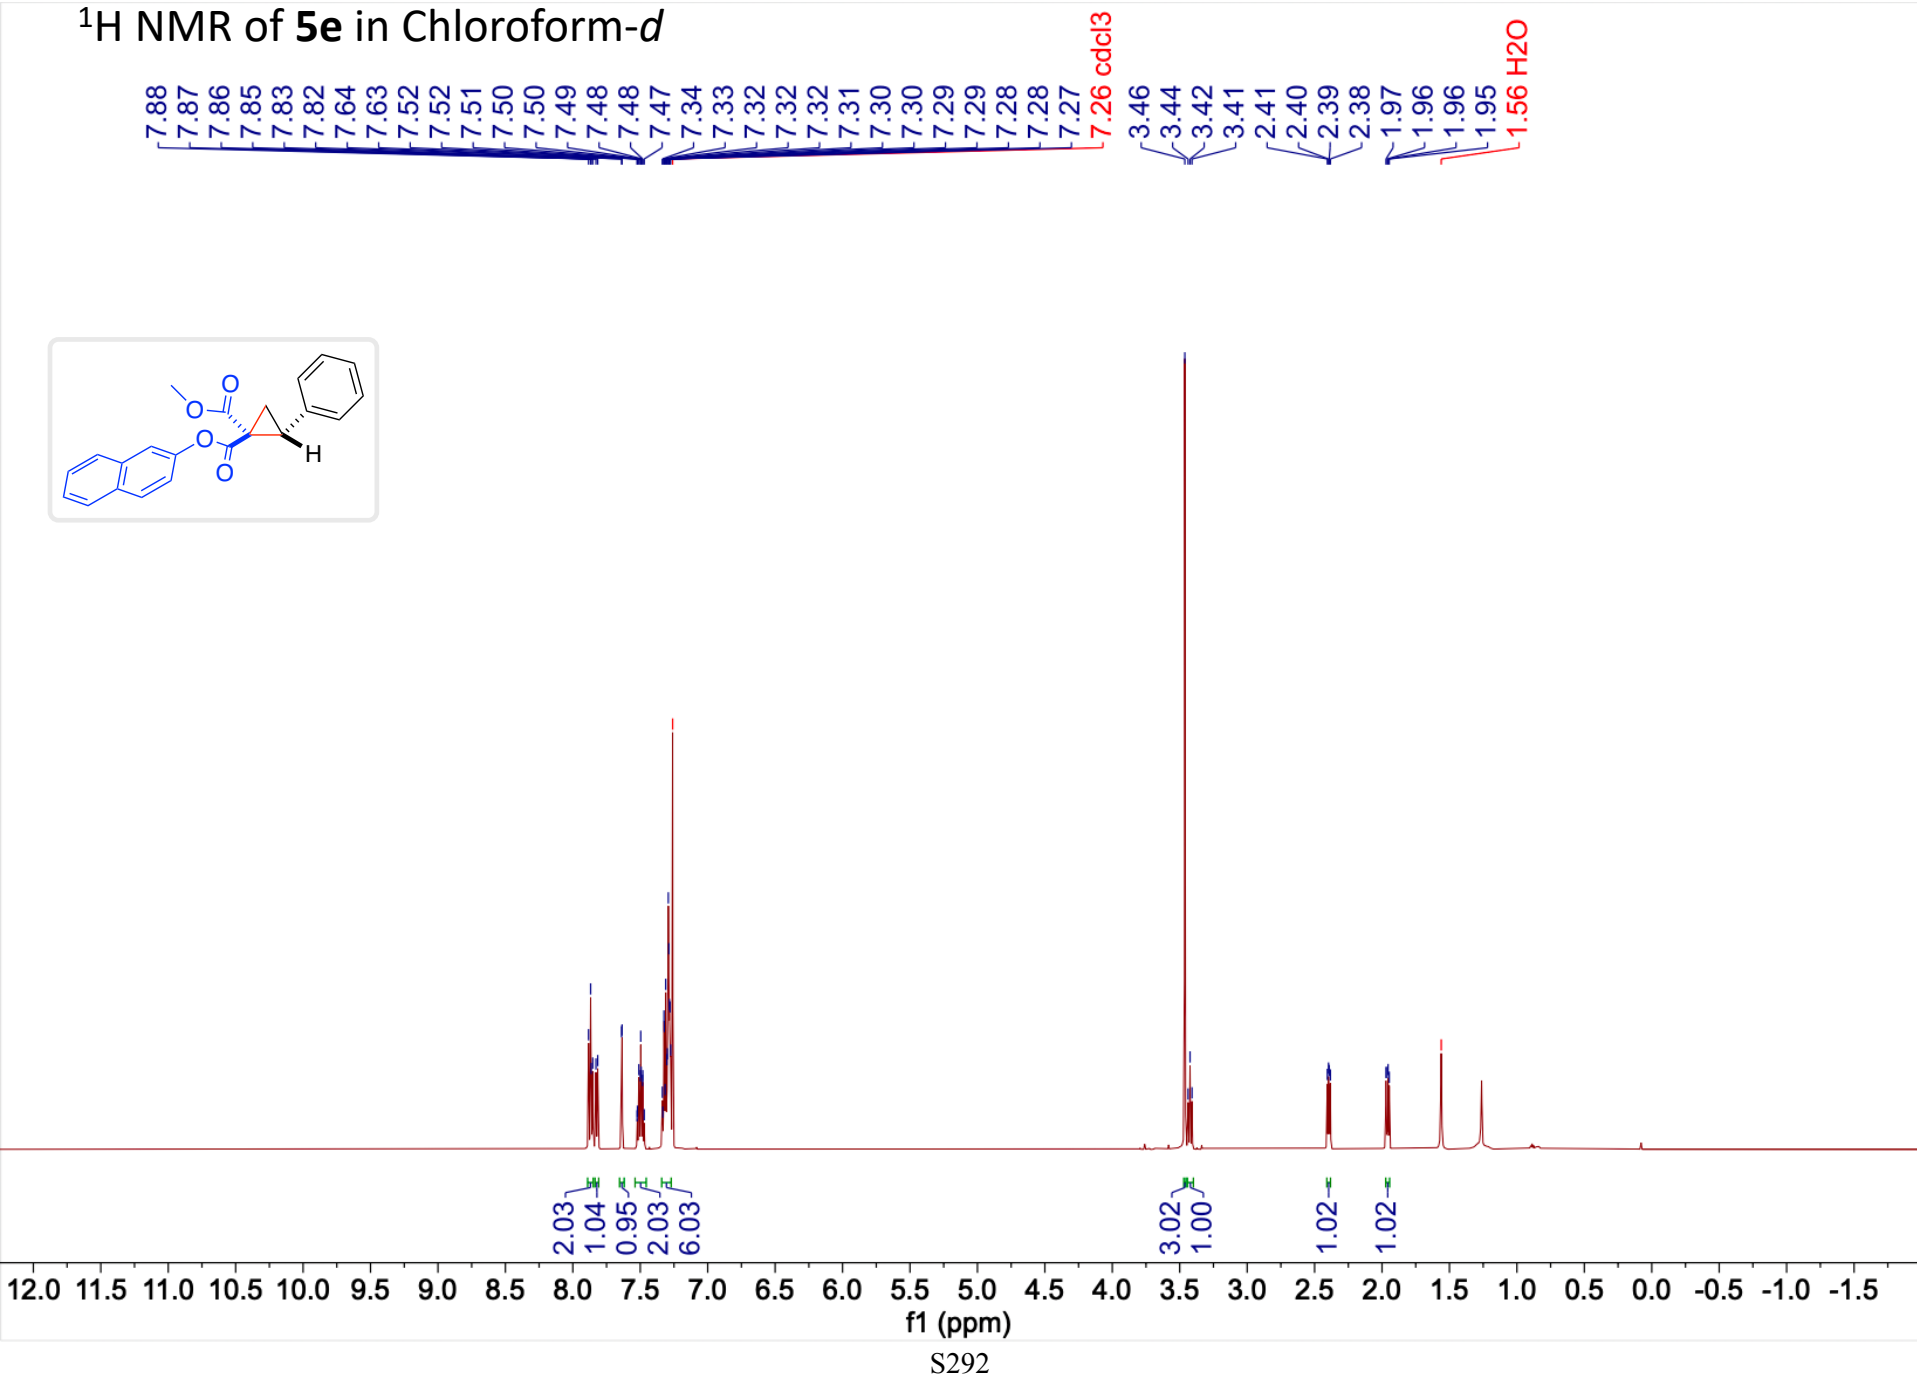

$^{13}\text{C}$  NMR of **5e**  
in Chloroform-*d*

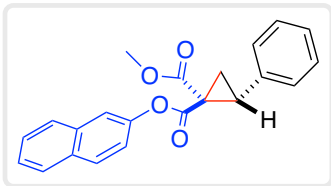

~168.81  
~166.94

—148.40  
134.43  
133.84  
131.70  
129.61  
128.73  
128.41  
127.94  
127.83  
127.75  
126.80  
125.99  
120.97  
118.64

77.48 cdcl3  
77.16 cdcl3  
76.84 cdcl3

—52.60

—37.59  
—33.26

—19.95

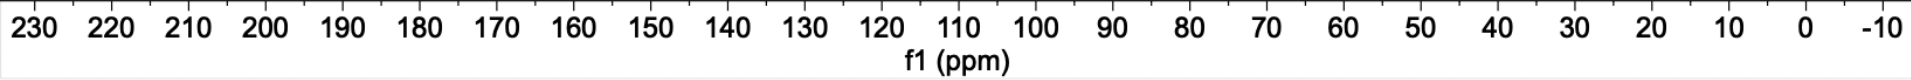

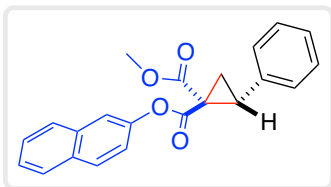

# HPLC of 5e

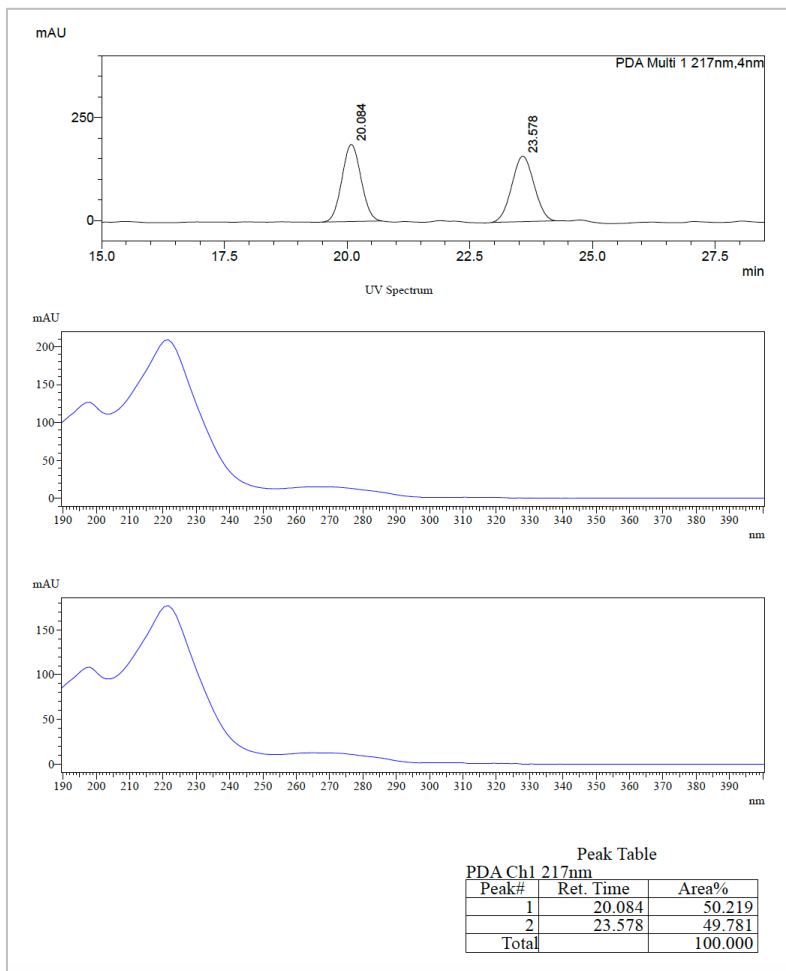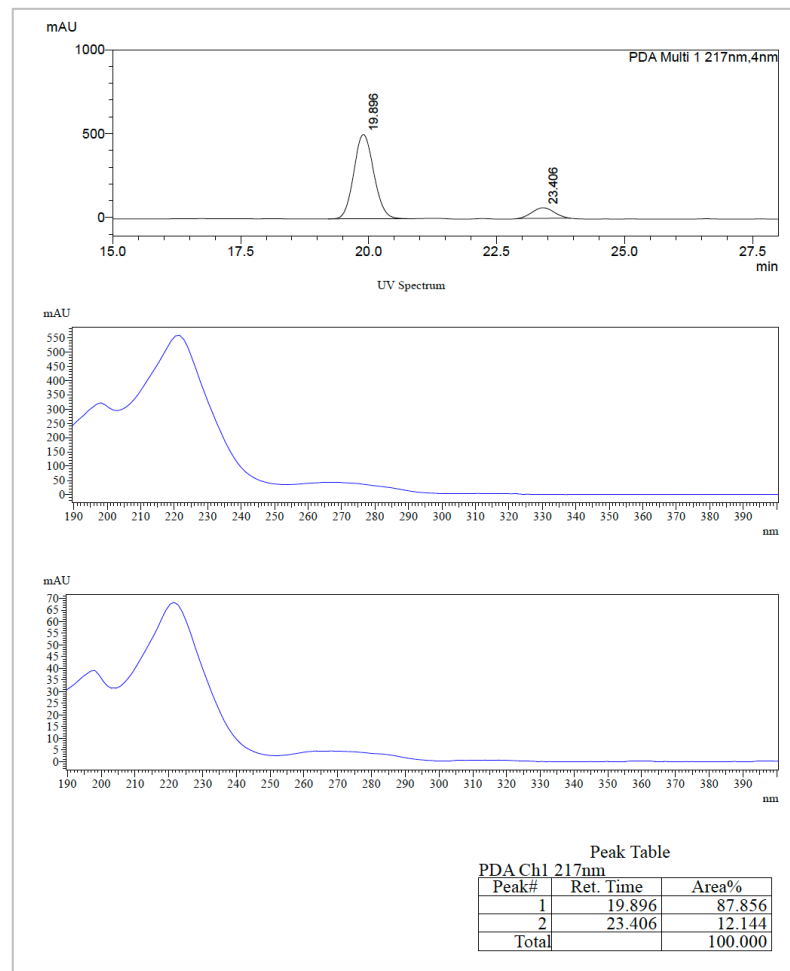

# <sup>1</sup>H NMR of **5f** in Chloroform-*d*

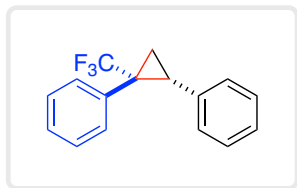

Another set belongs to diastereomer (•)

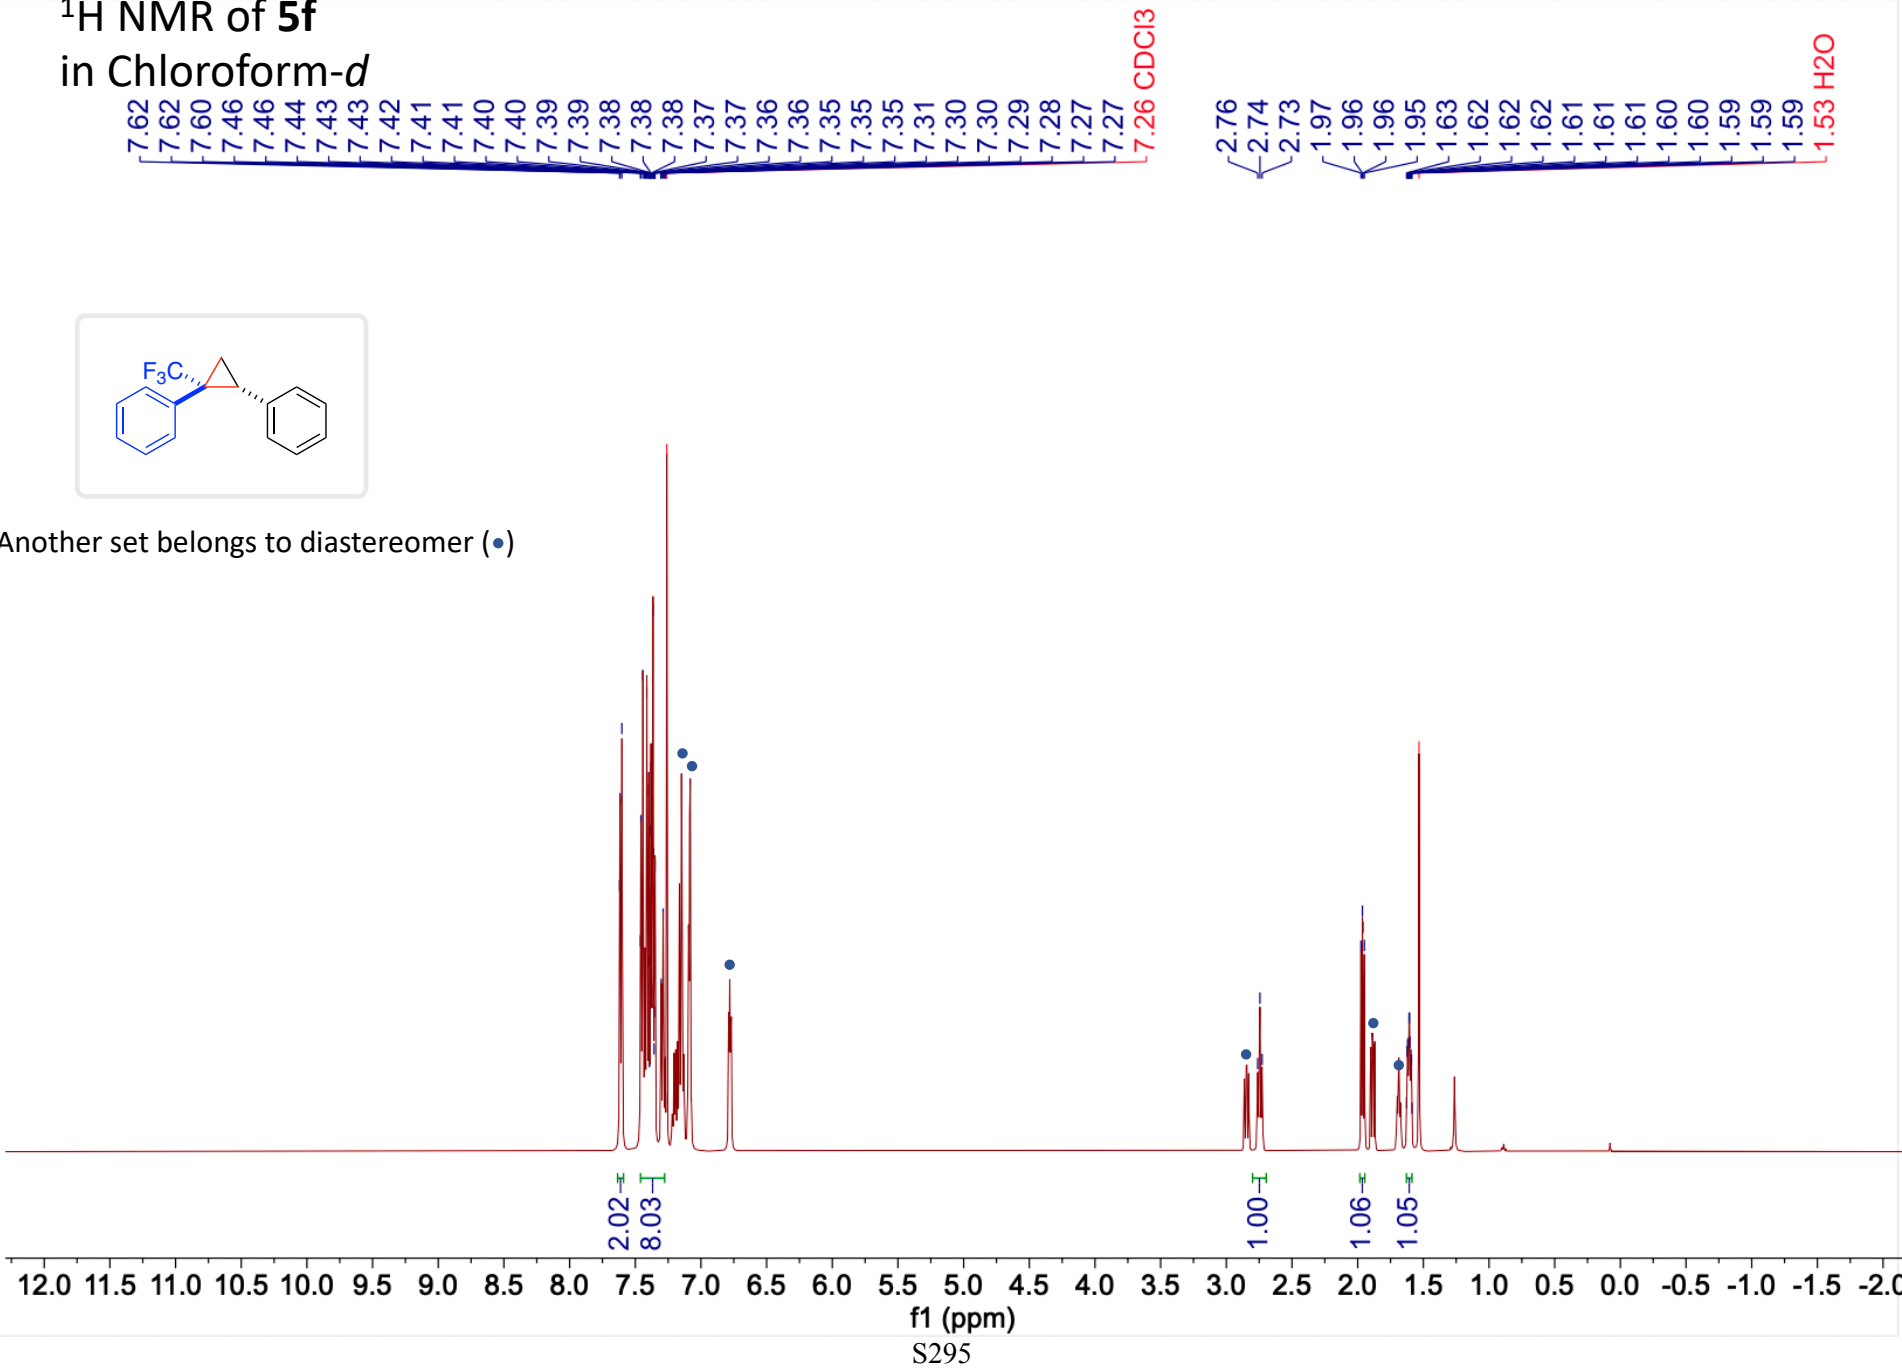



$^{13}\text{C}$  NMR of **5f**  
in Chloroform-*d*



Another set belongs to diastereomer

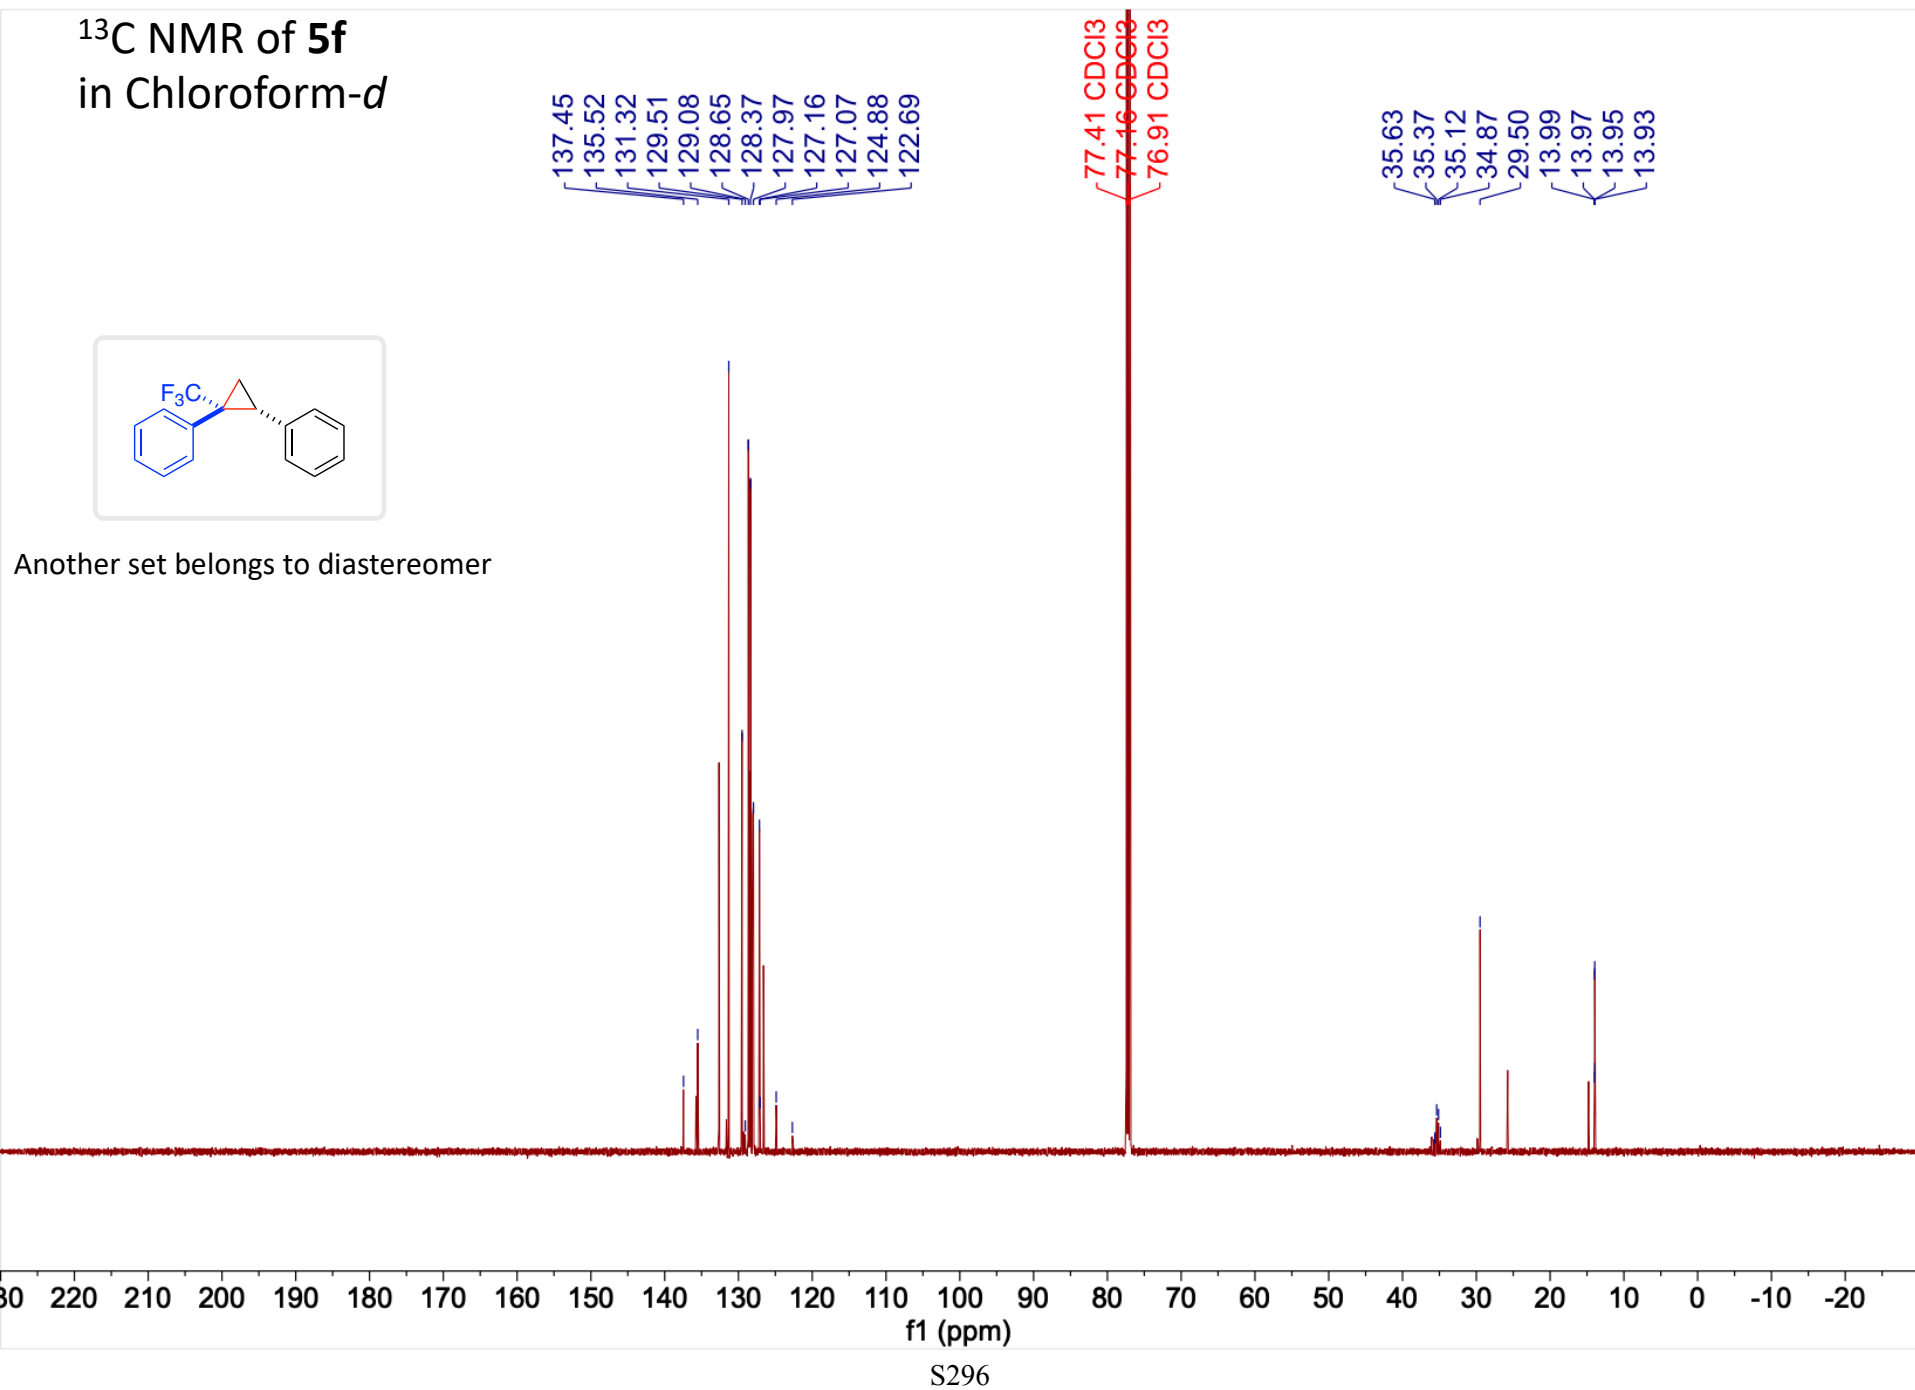

$^{19}\text{F}$  NMR of **5f**  
in Chloroform-*d*

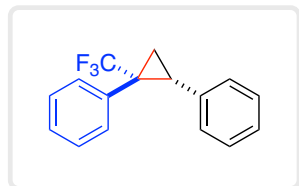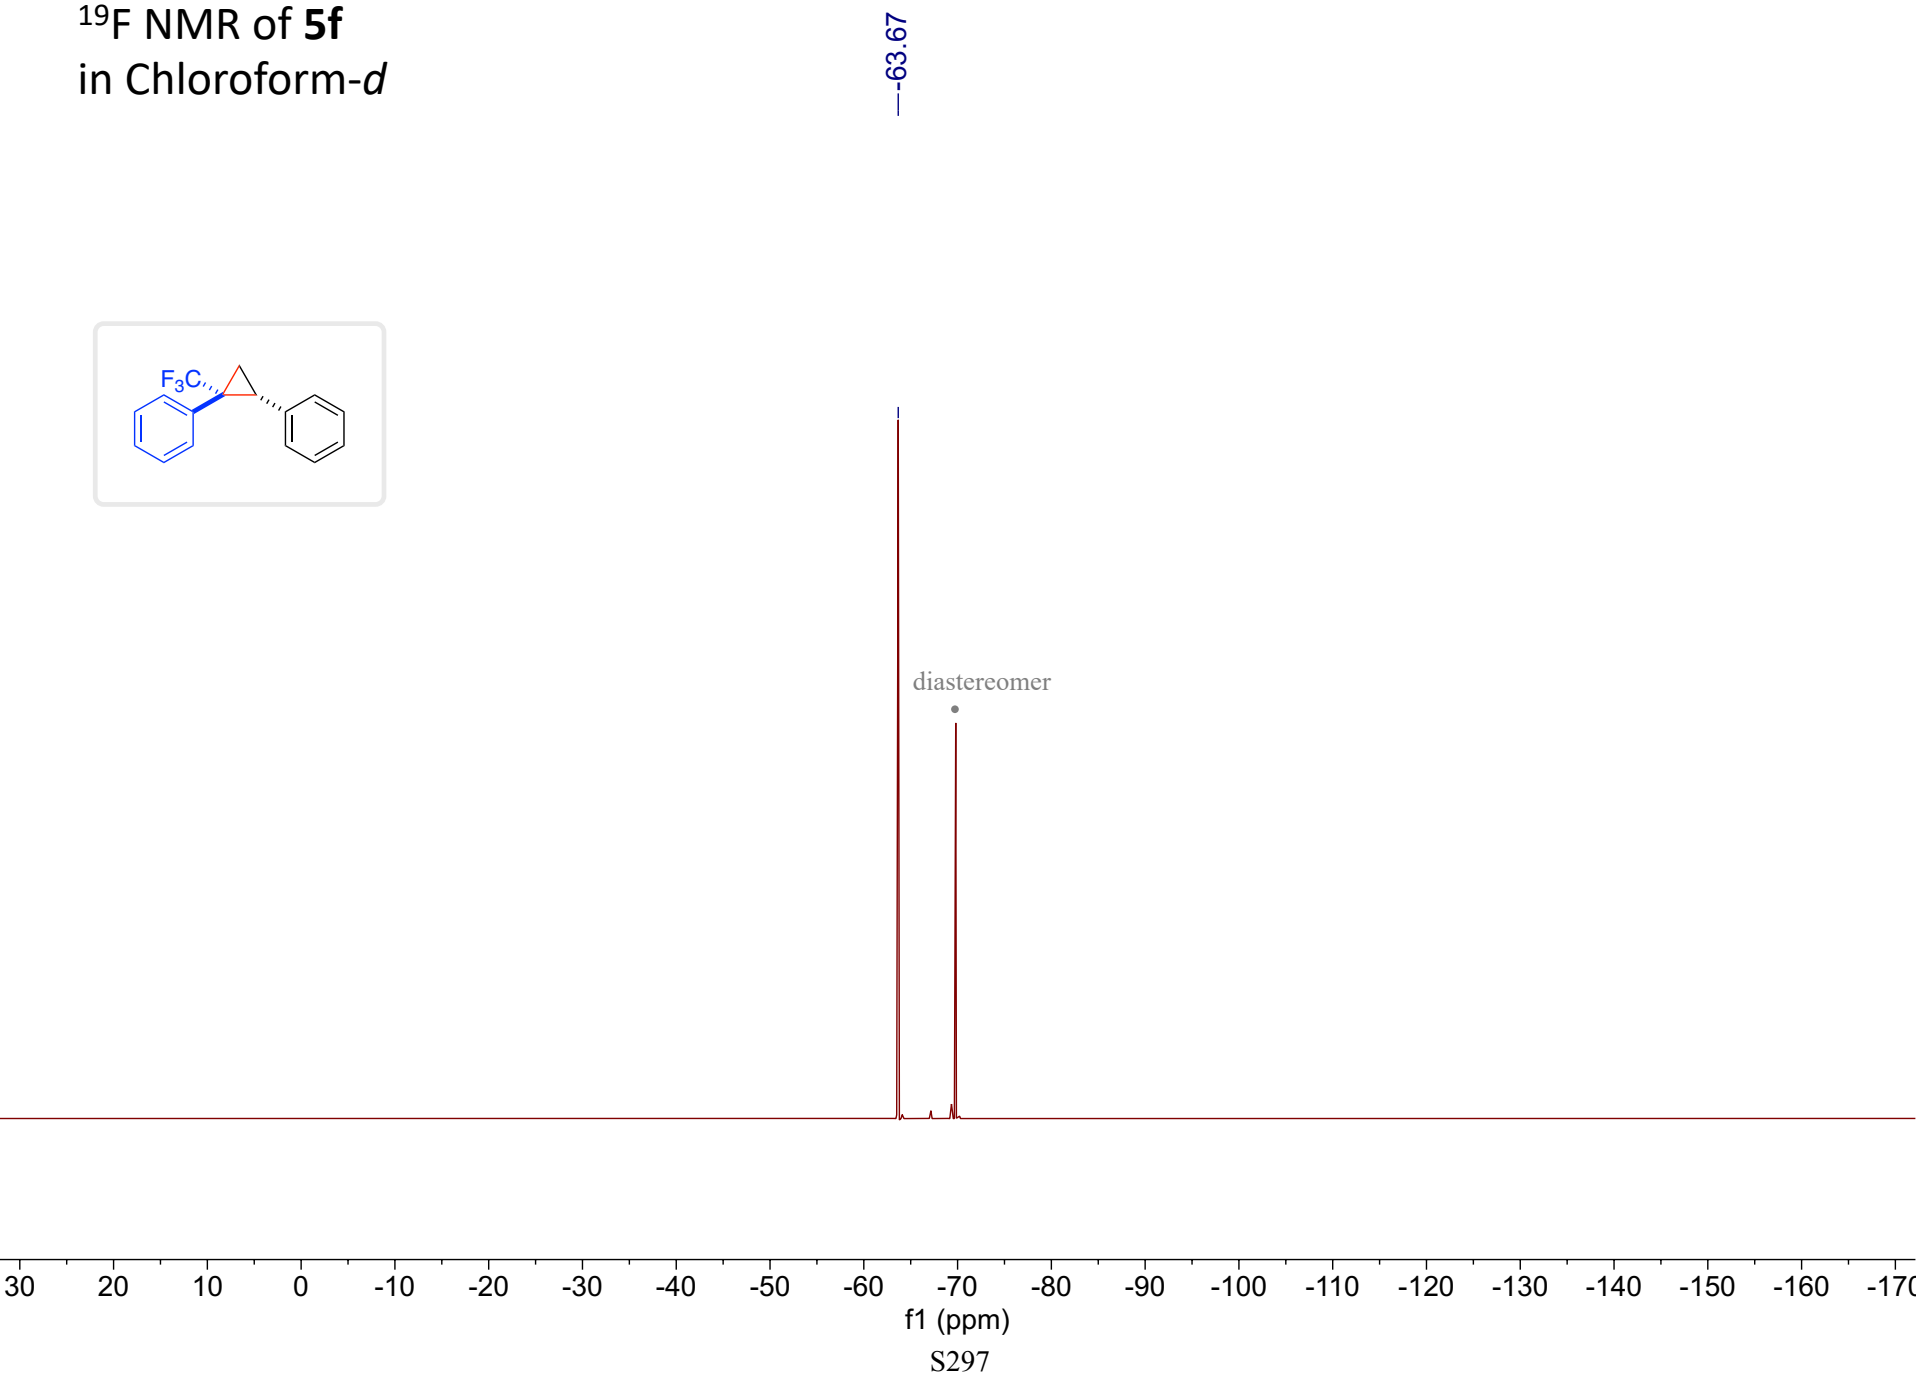

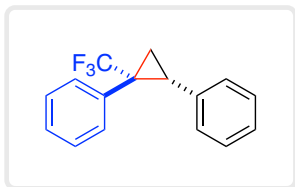

## HPLC of 5f

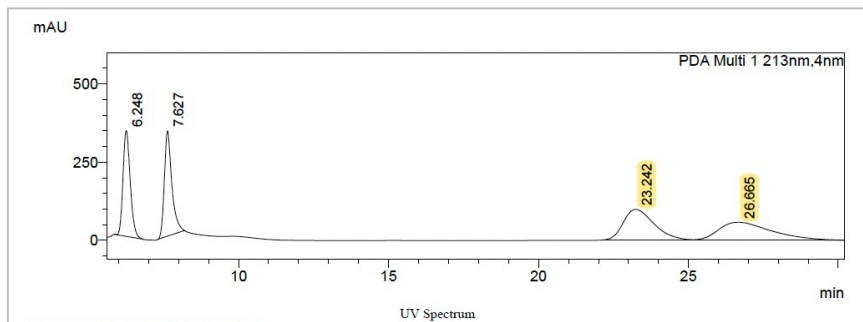

WCL-Y753-OJH-0.1%0.8mL001\_003.lcd

UV Spectrum

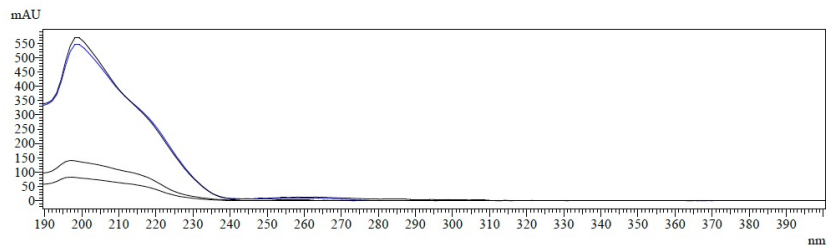

Peak Table  
PDA Ch1 213nm

| Peak# | Ret. Time | Area%   |
|-------|-----------|---------|
| 1     | 6.248     | 22.376  |
| 2     | 7.627     | 23.185  |
| 3     | 23.242    | 27.282  |
| 4     | 26.665    | 27.157  |
| Total |           | 100.000 |

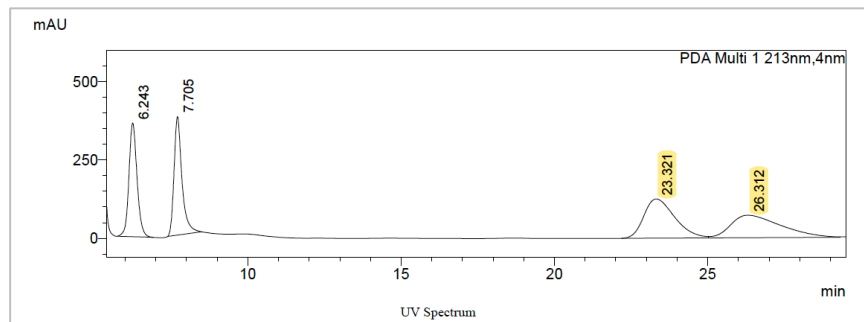

WCL-Y754-OJH-0.1%0.8mL\_002.lcd

UV Spectrum

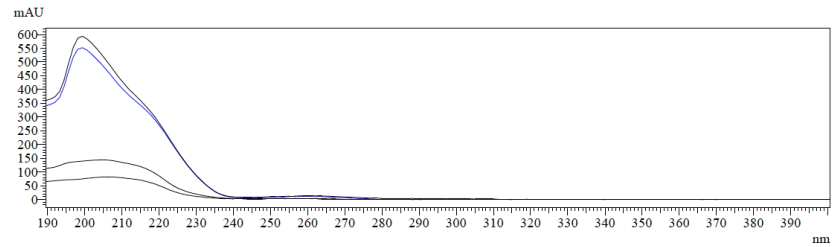

Peak Table  
PDA Ch1 213nm

| Peak# | Ret. Time | Area%   |
|-------|-----------|---------|
| 1     | 6.243     | 21.927  |
| 2     | 7.705     | 22.340  |
| 3     | 23.321    | 28.762  |
| 4     | 26.312    | 26.971  |
| Total |           | 100.000 |

<sup>1</sup>H NMR of **5g**  
in Chloroform-*d*

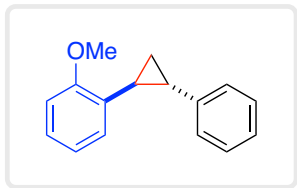

7.35  
7.34  
7.32  
7.29  
7.26 CDCl<sub>3</sub>  
7.24  
7.22  
7.21  
7.03  
7.02  
6.98  
6.97  
6.95  
6.92  
6.90

3.88  
2.55  
2.54  
2.53  
2.52  
2.52  
2.51  
2.21  
2.20  
2.19  
2.18  
2.18  
2.17  
1.56 H<sub>2</sub>O  
1.47  
1.45  
1.44  
1.41  
1.41

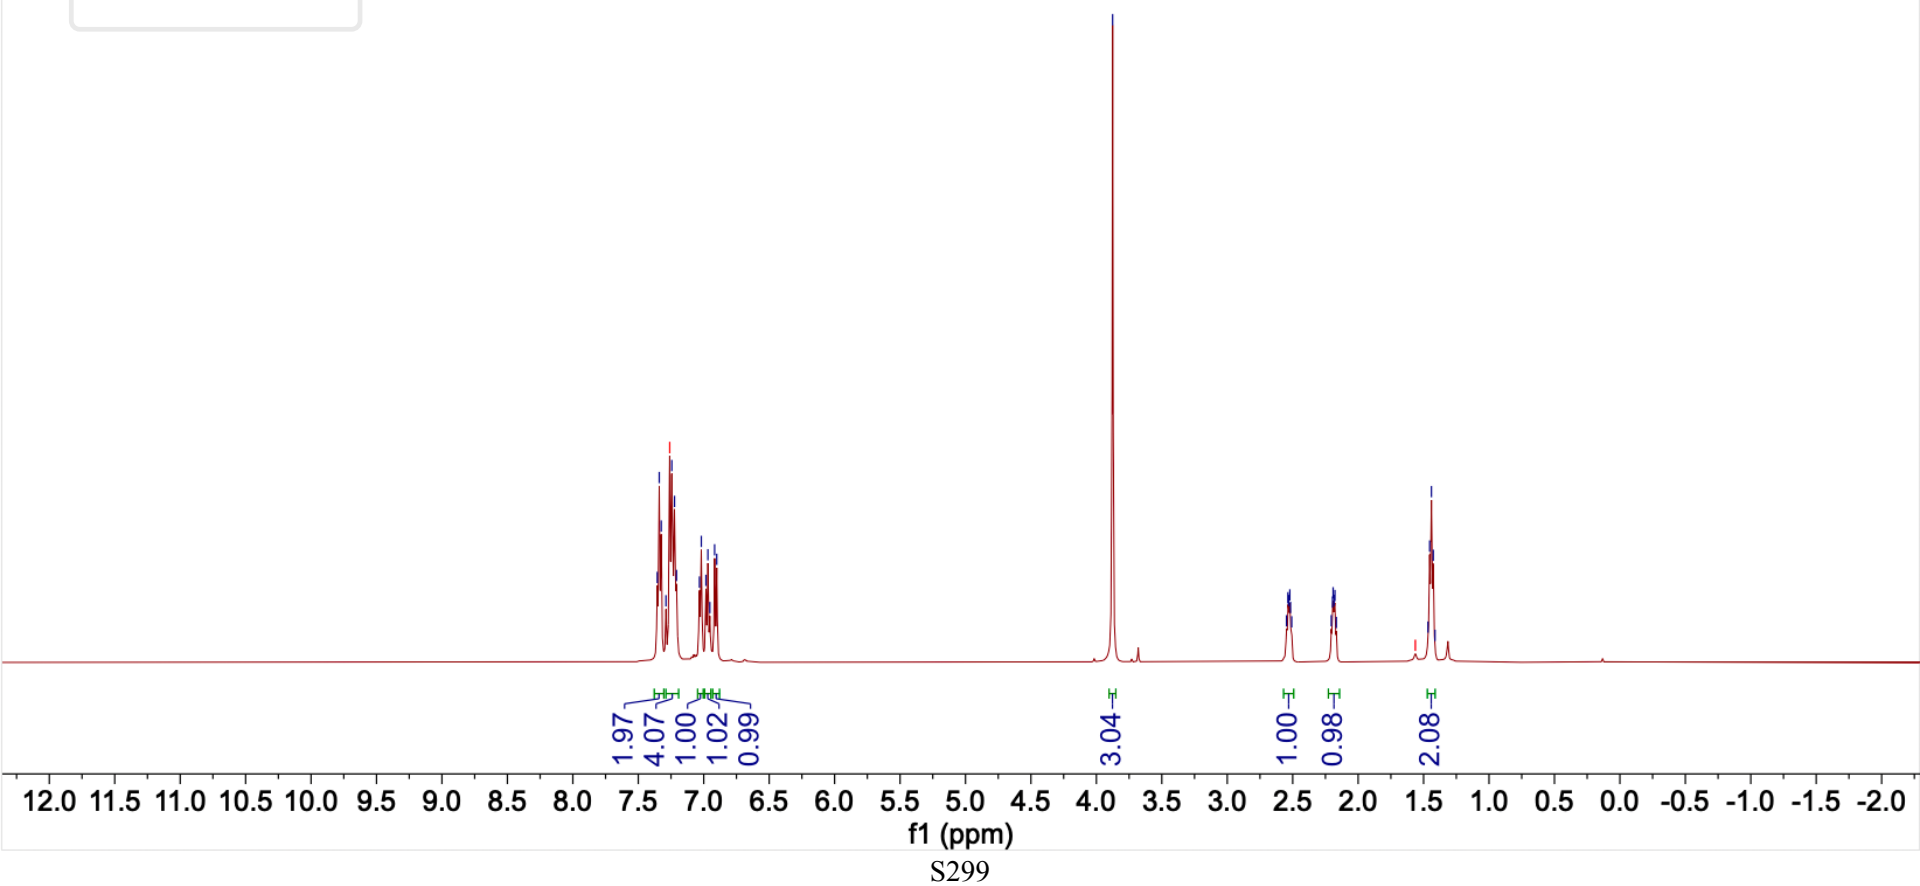

<sup>13</sup>C NMR of **5g**  
in Chloroform-*d*

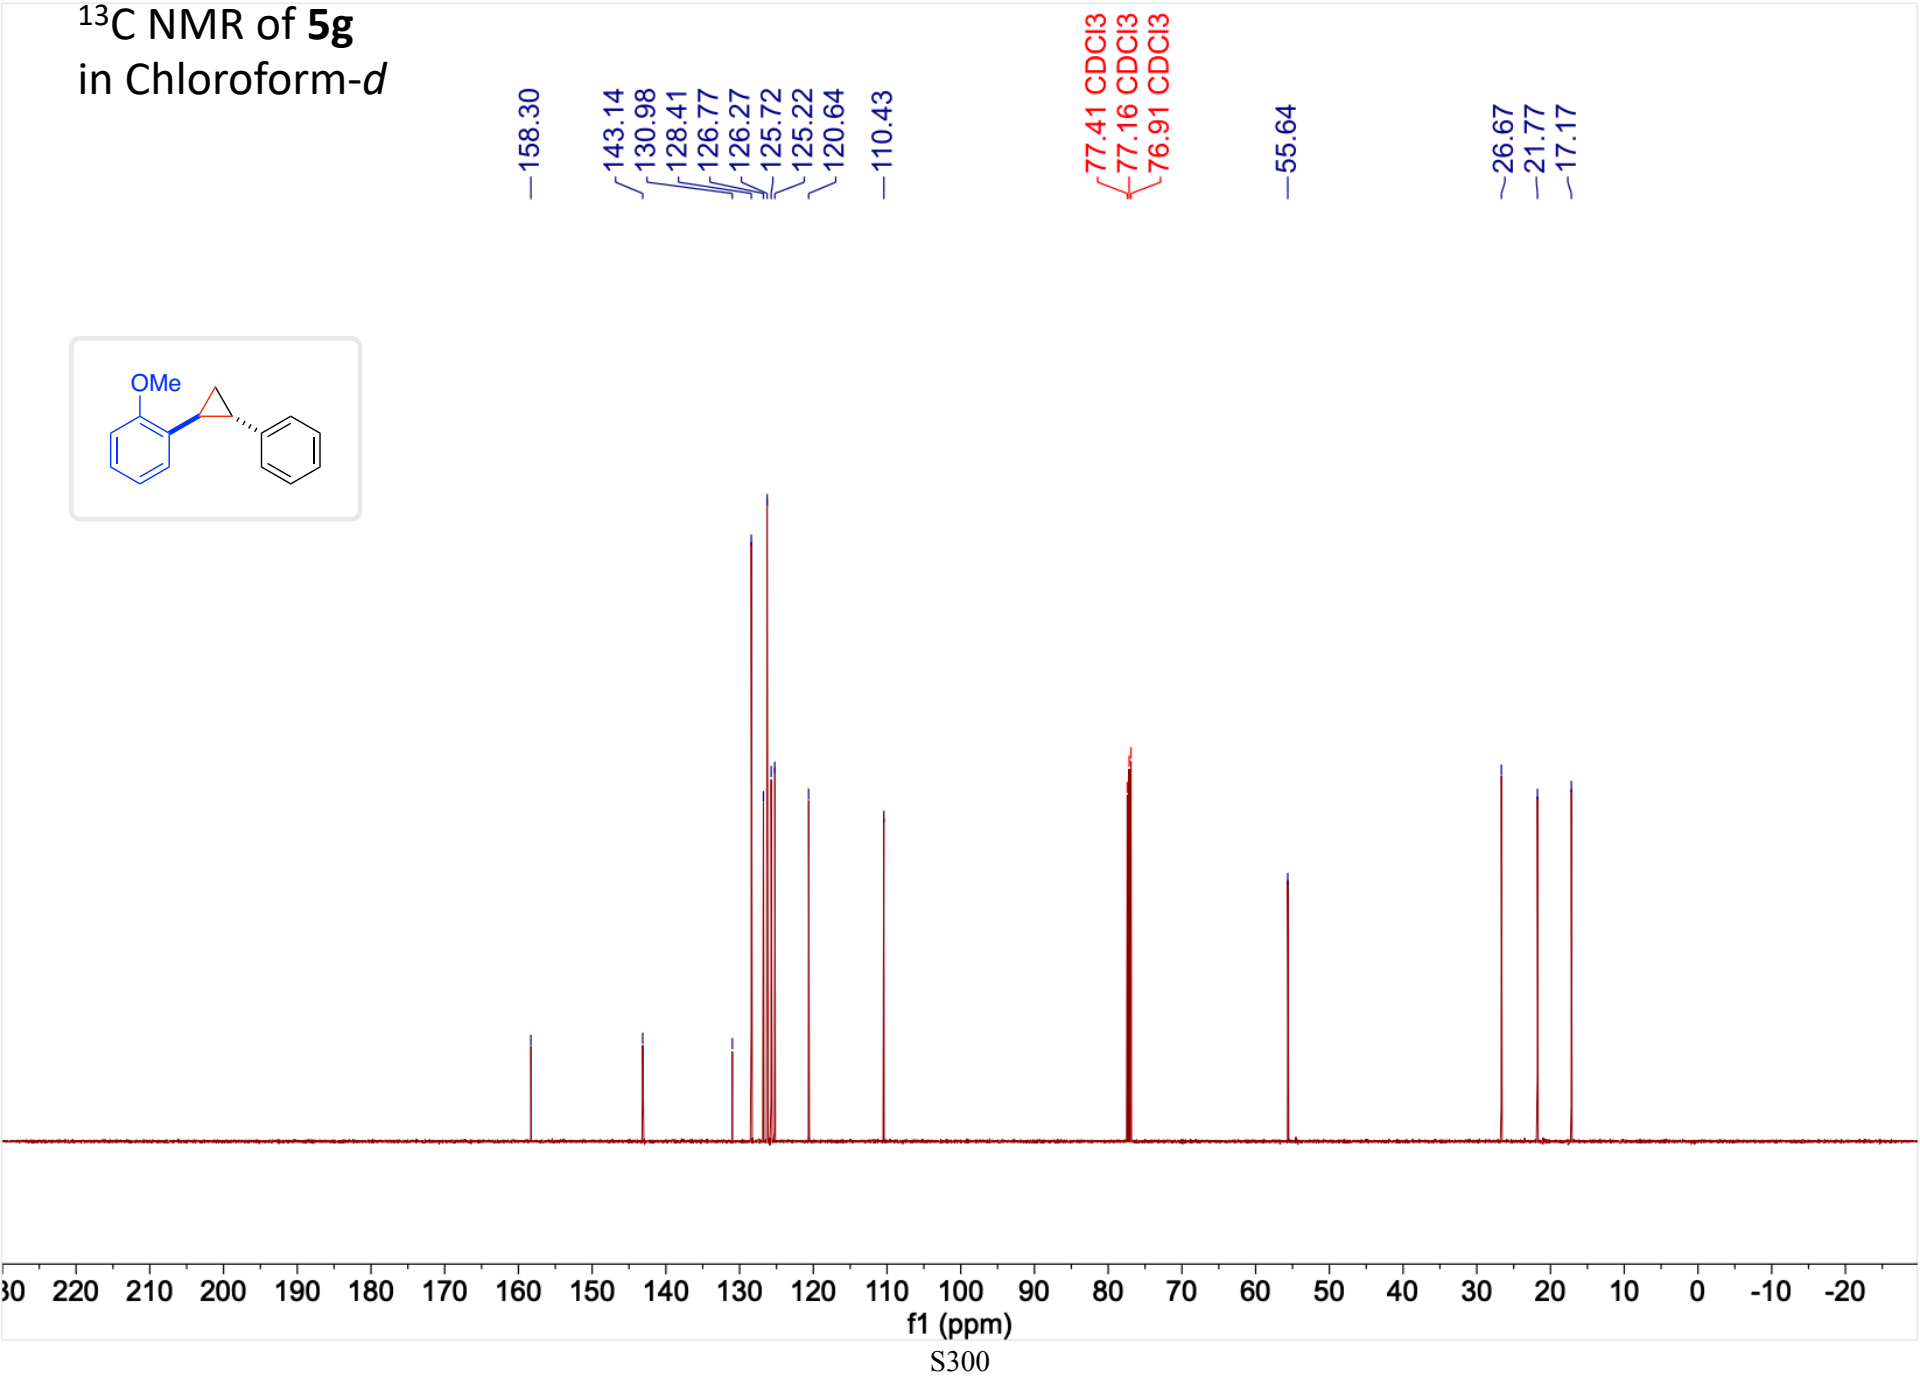

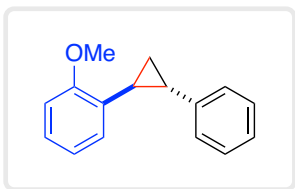

# HPLC of 5g

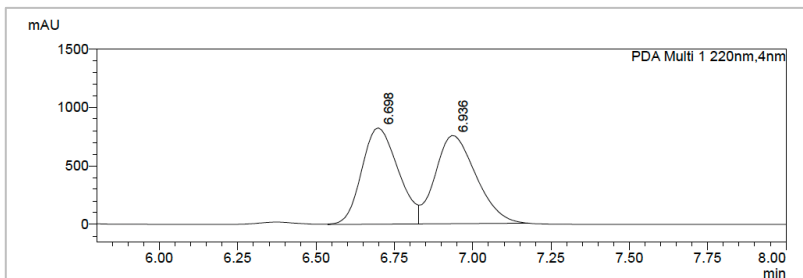

UV Spectrum

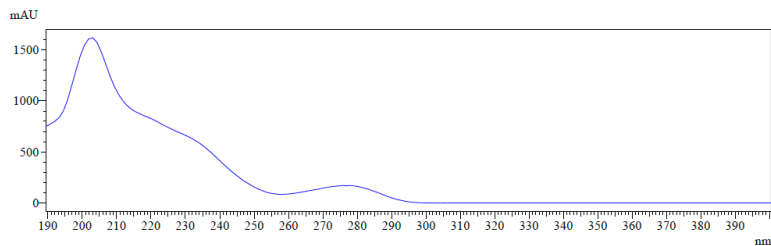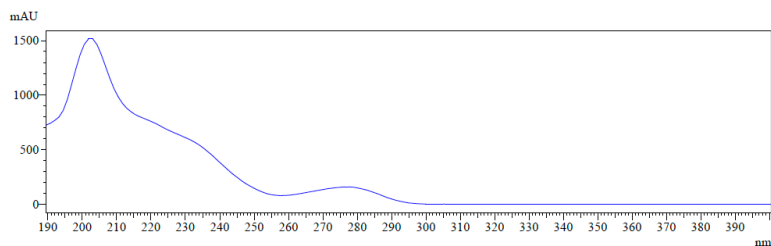

Peak Table  
PDA Ch1 220nm

| Peak# | Ret. Time | Area%   |
|-------|-----------|---------|
| 1     | 6.698     | 49.502  |
| 2     | 6.936     | 50.498  |
| Total |           | 100.000 |

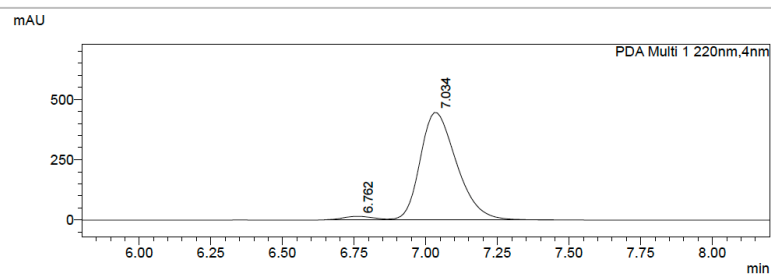

UV Spectrum

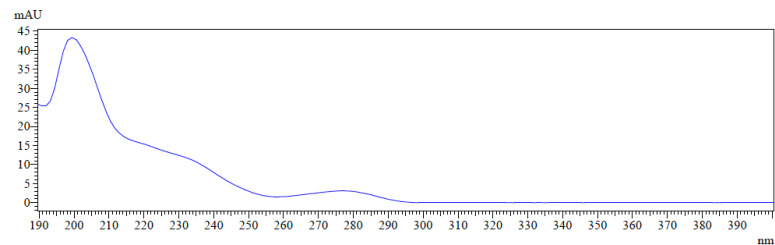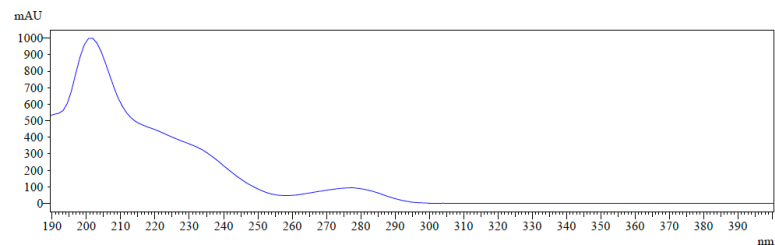

Peak Table  
PDA Ch1 220nm

| Peak# | Ret. Time | Area%   |
|-------|-----------|---------|
| 1     | 6.762     | 2.592   |
| 2     | 7.034     | 97.408  |
| Total |           | 100.000 |

<sup>1</sup>H NMR of **5h**  
in Chloroform-*d*

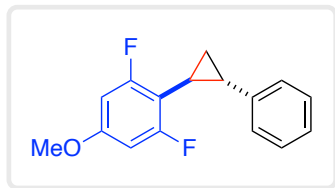

7.32  
7.31  
7.29  
7.26 CDCl<sub>3</sub>  
7.22  
7.20  
7.19  
6.43  
6.41

3.77  
2.39  
2.38  
2.37  
2.37  
2.36  
2.35  
2.01  
2.00  
1.99  
1.99  
1.98  
1.97  
1.56  
1.55  
1.54 H<sub>2</sub>O  
1.53  
1.52  
1.42  
1.41  
1.40  
1.39  
1.38

Another set belongs to diastereomer (•)

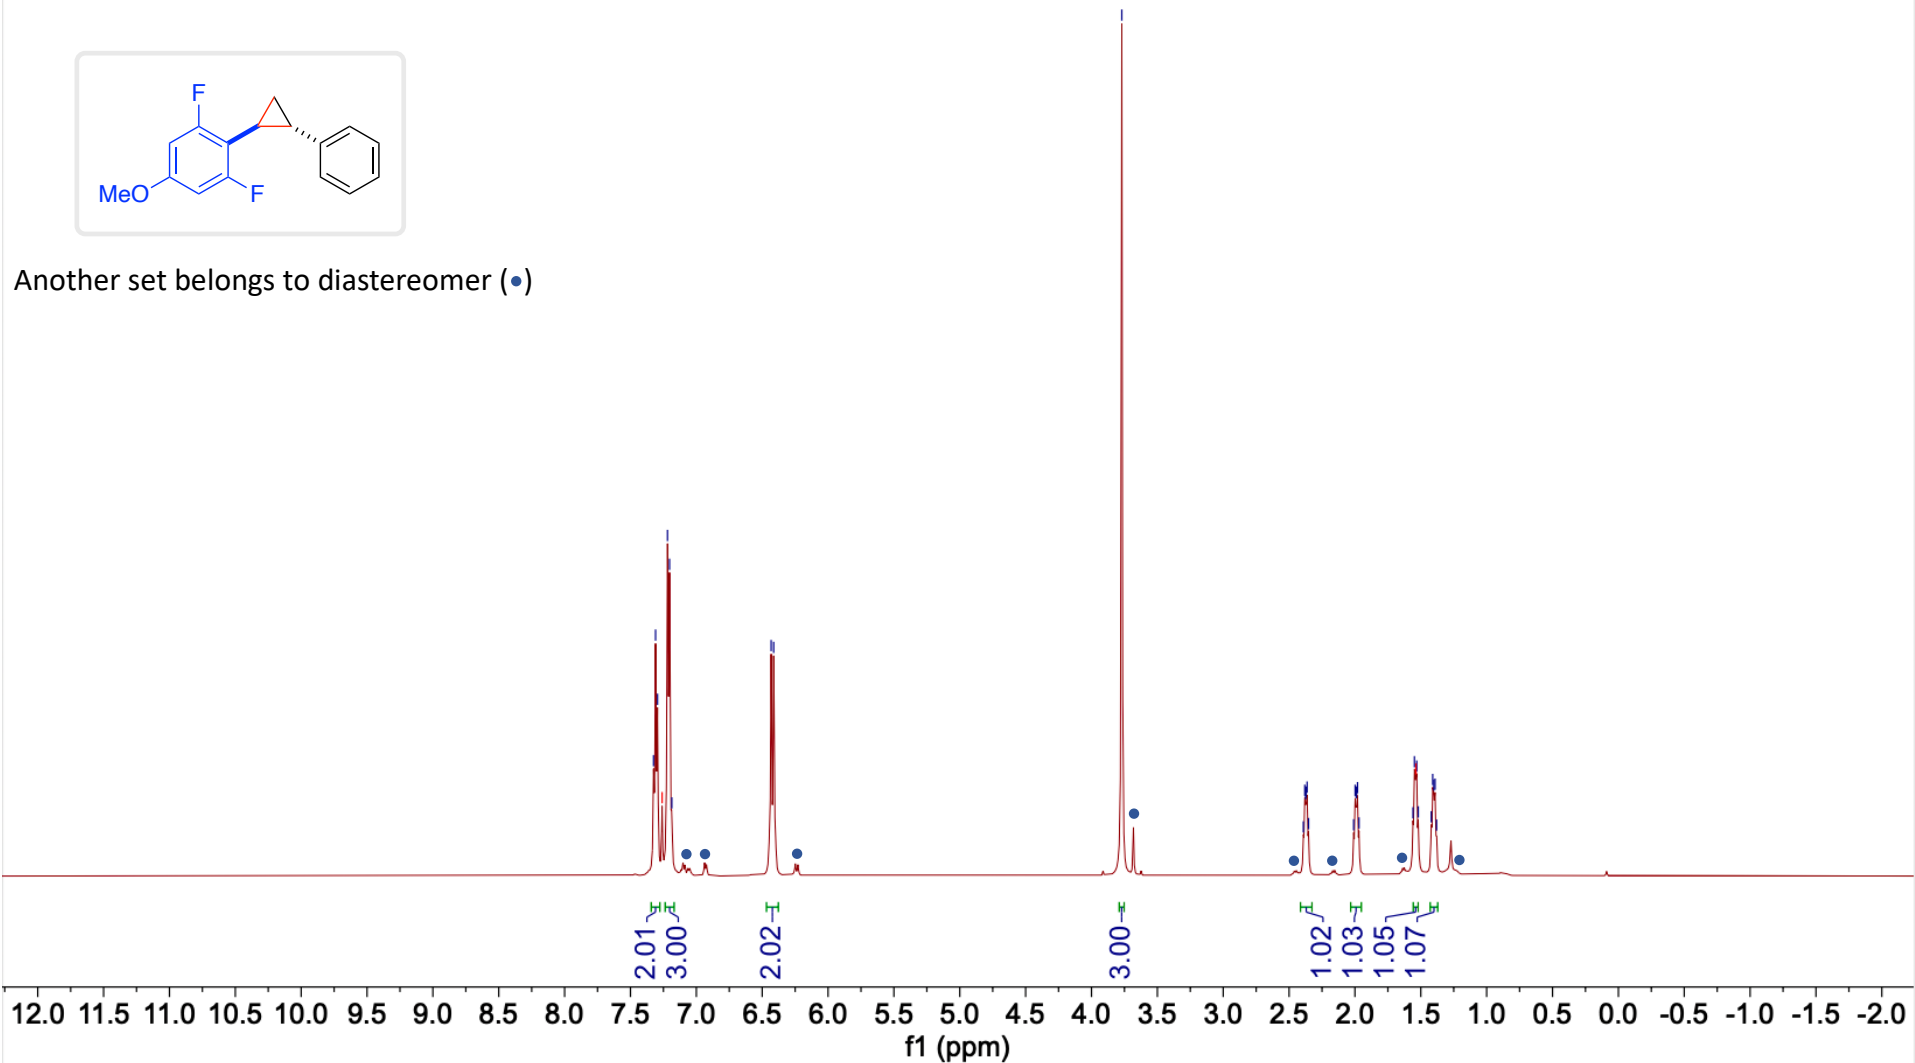

<sup>13</sup>C NMR of **5h**  
in Chloroform-*d*

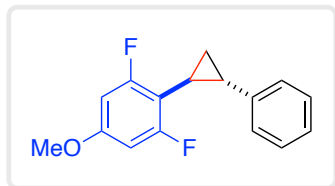

163.77  
163.67  
161.81  
161.72  
159.12  
159.01  
158.90  
— 142.51  
  
128.51  
126.31  
126.00  
  
109.92  
109.78  
109.64  
98.15  
97.91  
  
77.42 CDCl<sub>3</sub>  
77.16 CDCl<sub>3</sub>  
76.91 CDCl<sub>3</sub>  
  
— 55.84  
  
24.02  
24.00  
23.98  
16.73  
16.71  
16.69  
15.55  
15.52  
15.50

Another set belongs to diastereomer

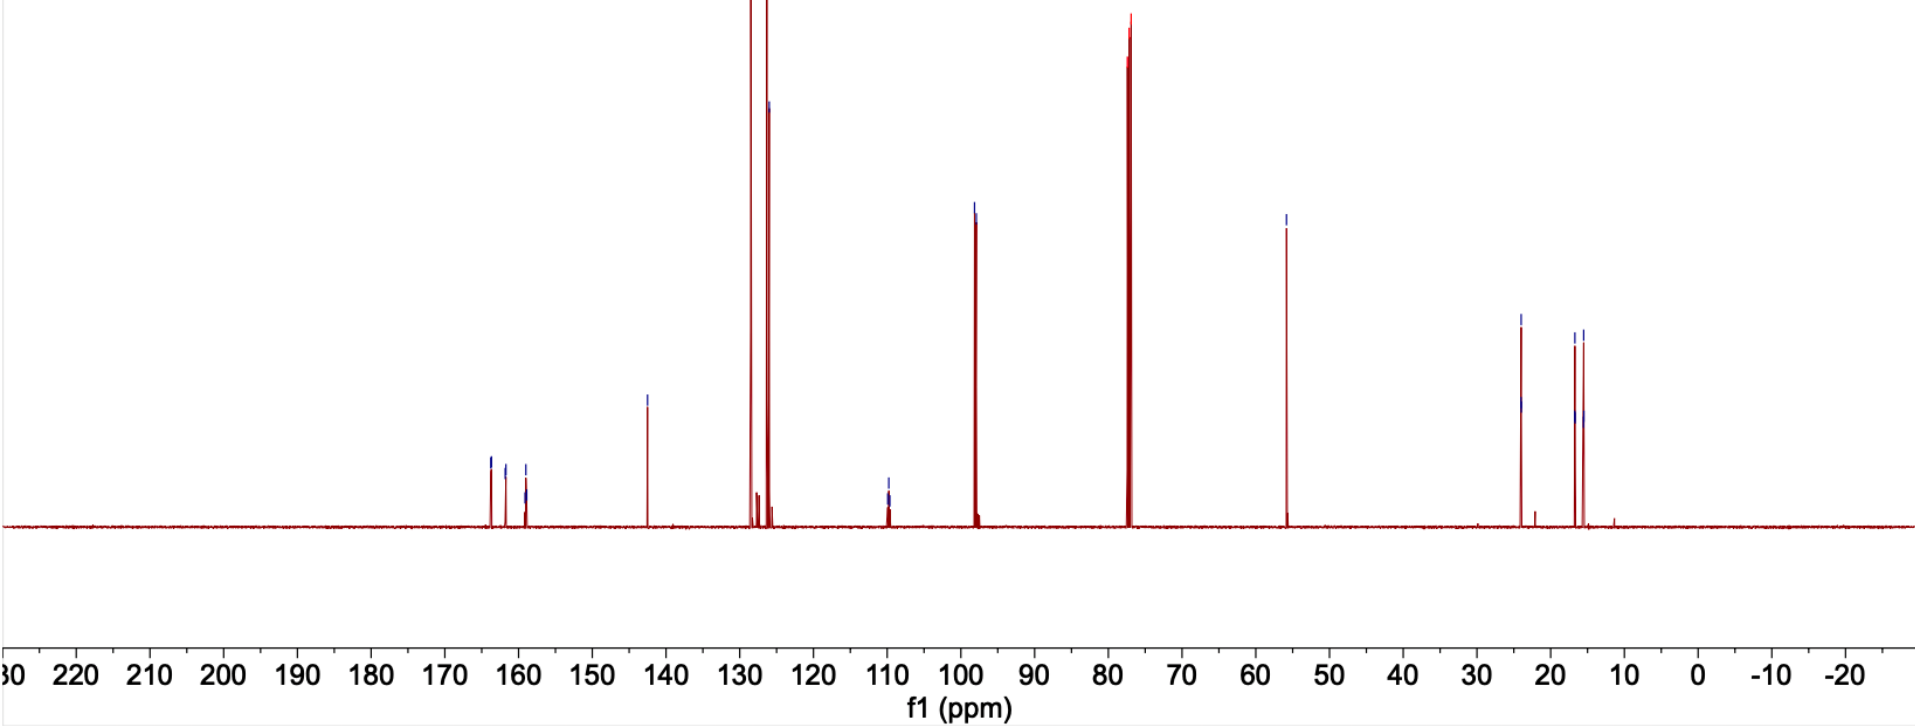

S303



$^{19}\text{F}$  NMR of **5h**  
in Chloroform-*d*

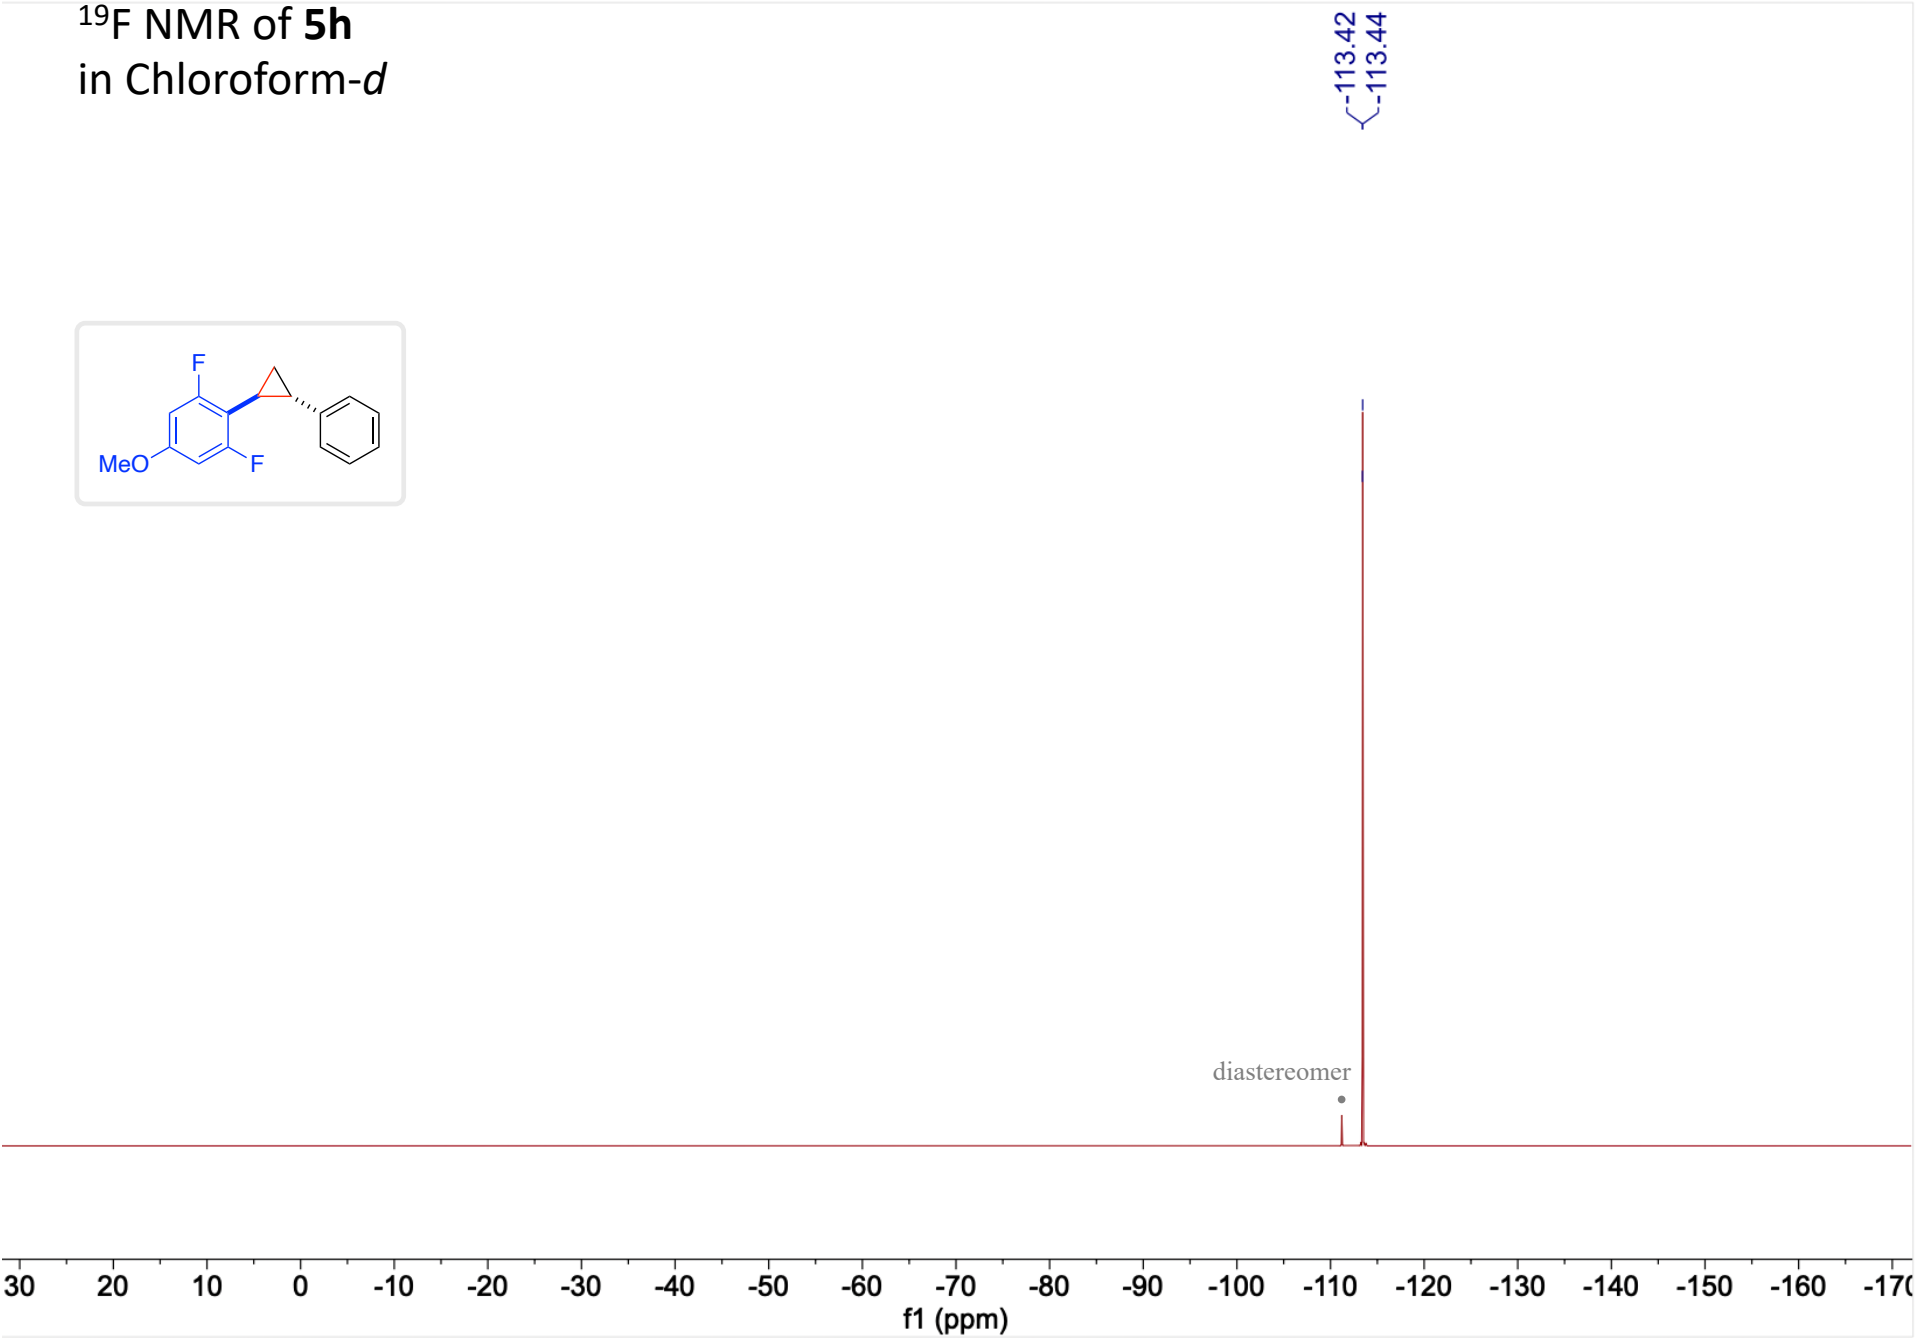

# HPLC of 5h

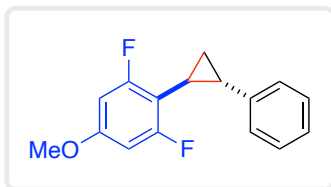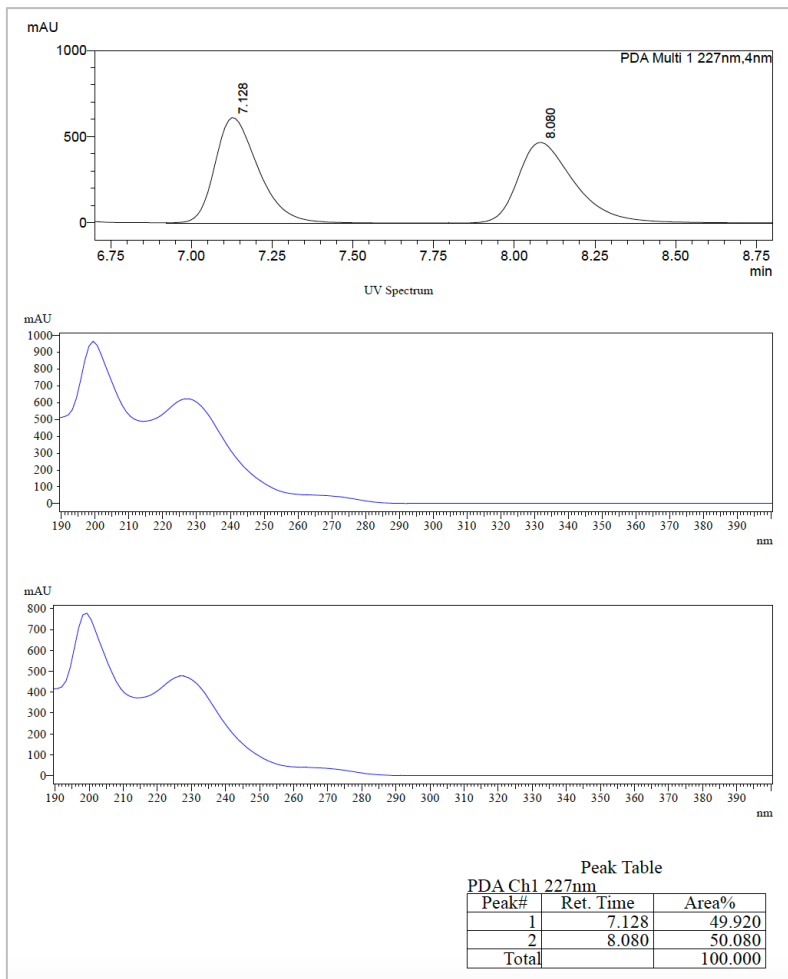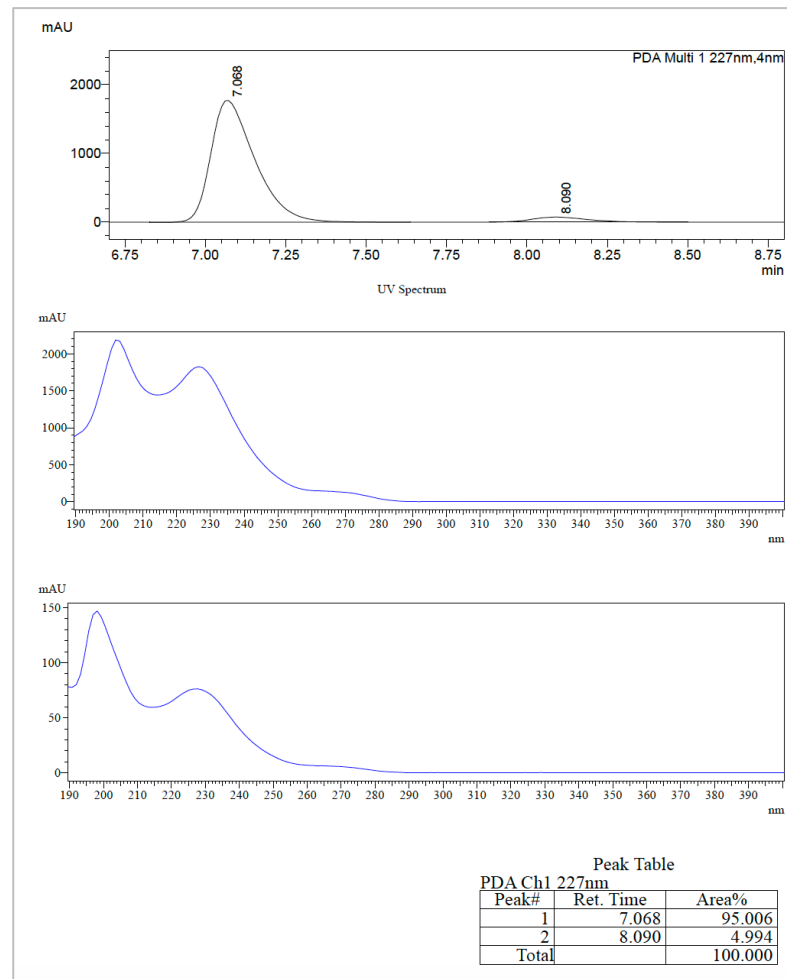

<sup>1</sup>H NMR of **5i**  
in Chloroform-*d*

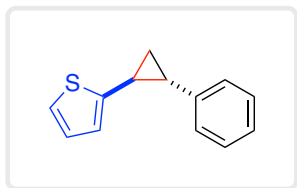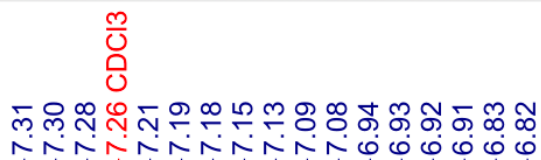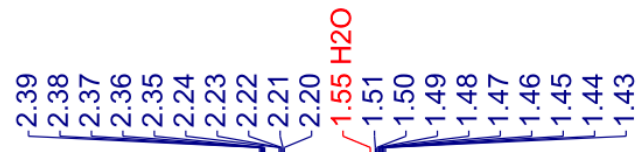

Another set belongs to diastereomer (•)

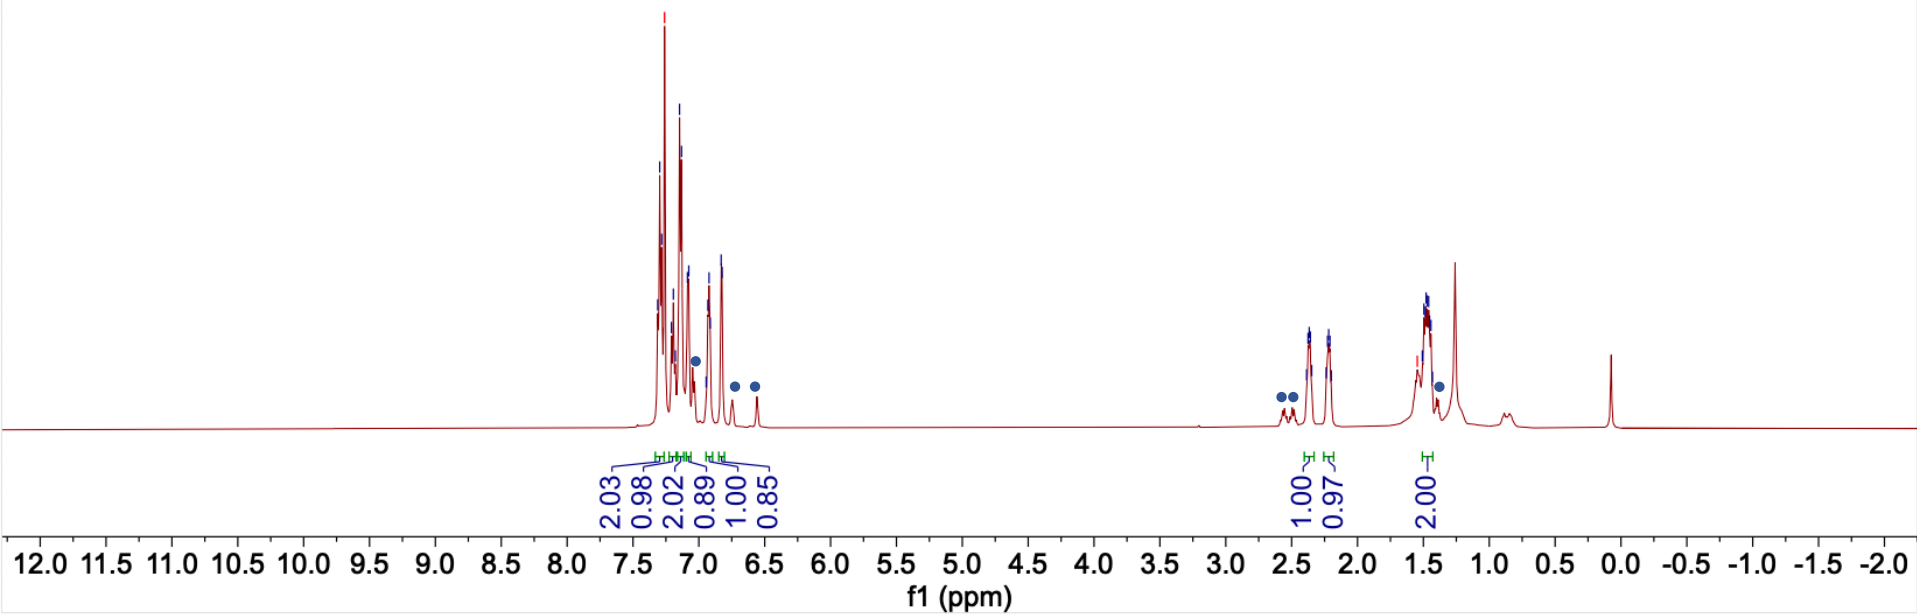

<sup>13</sup>C NMR of **5i**  
in Chloroform-*d*

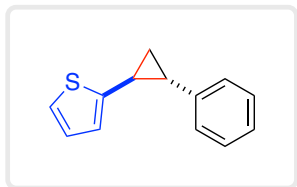

Another set belongs to diastereomer (•)

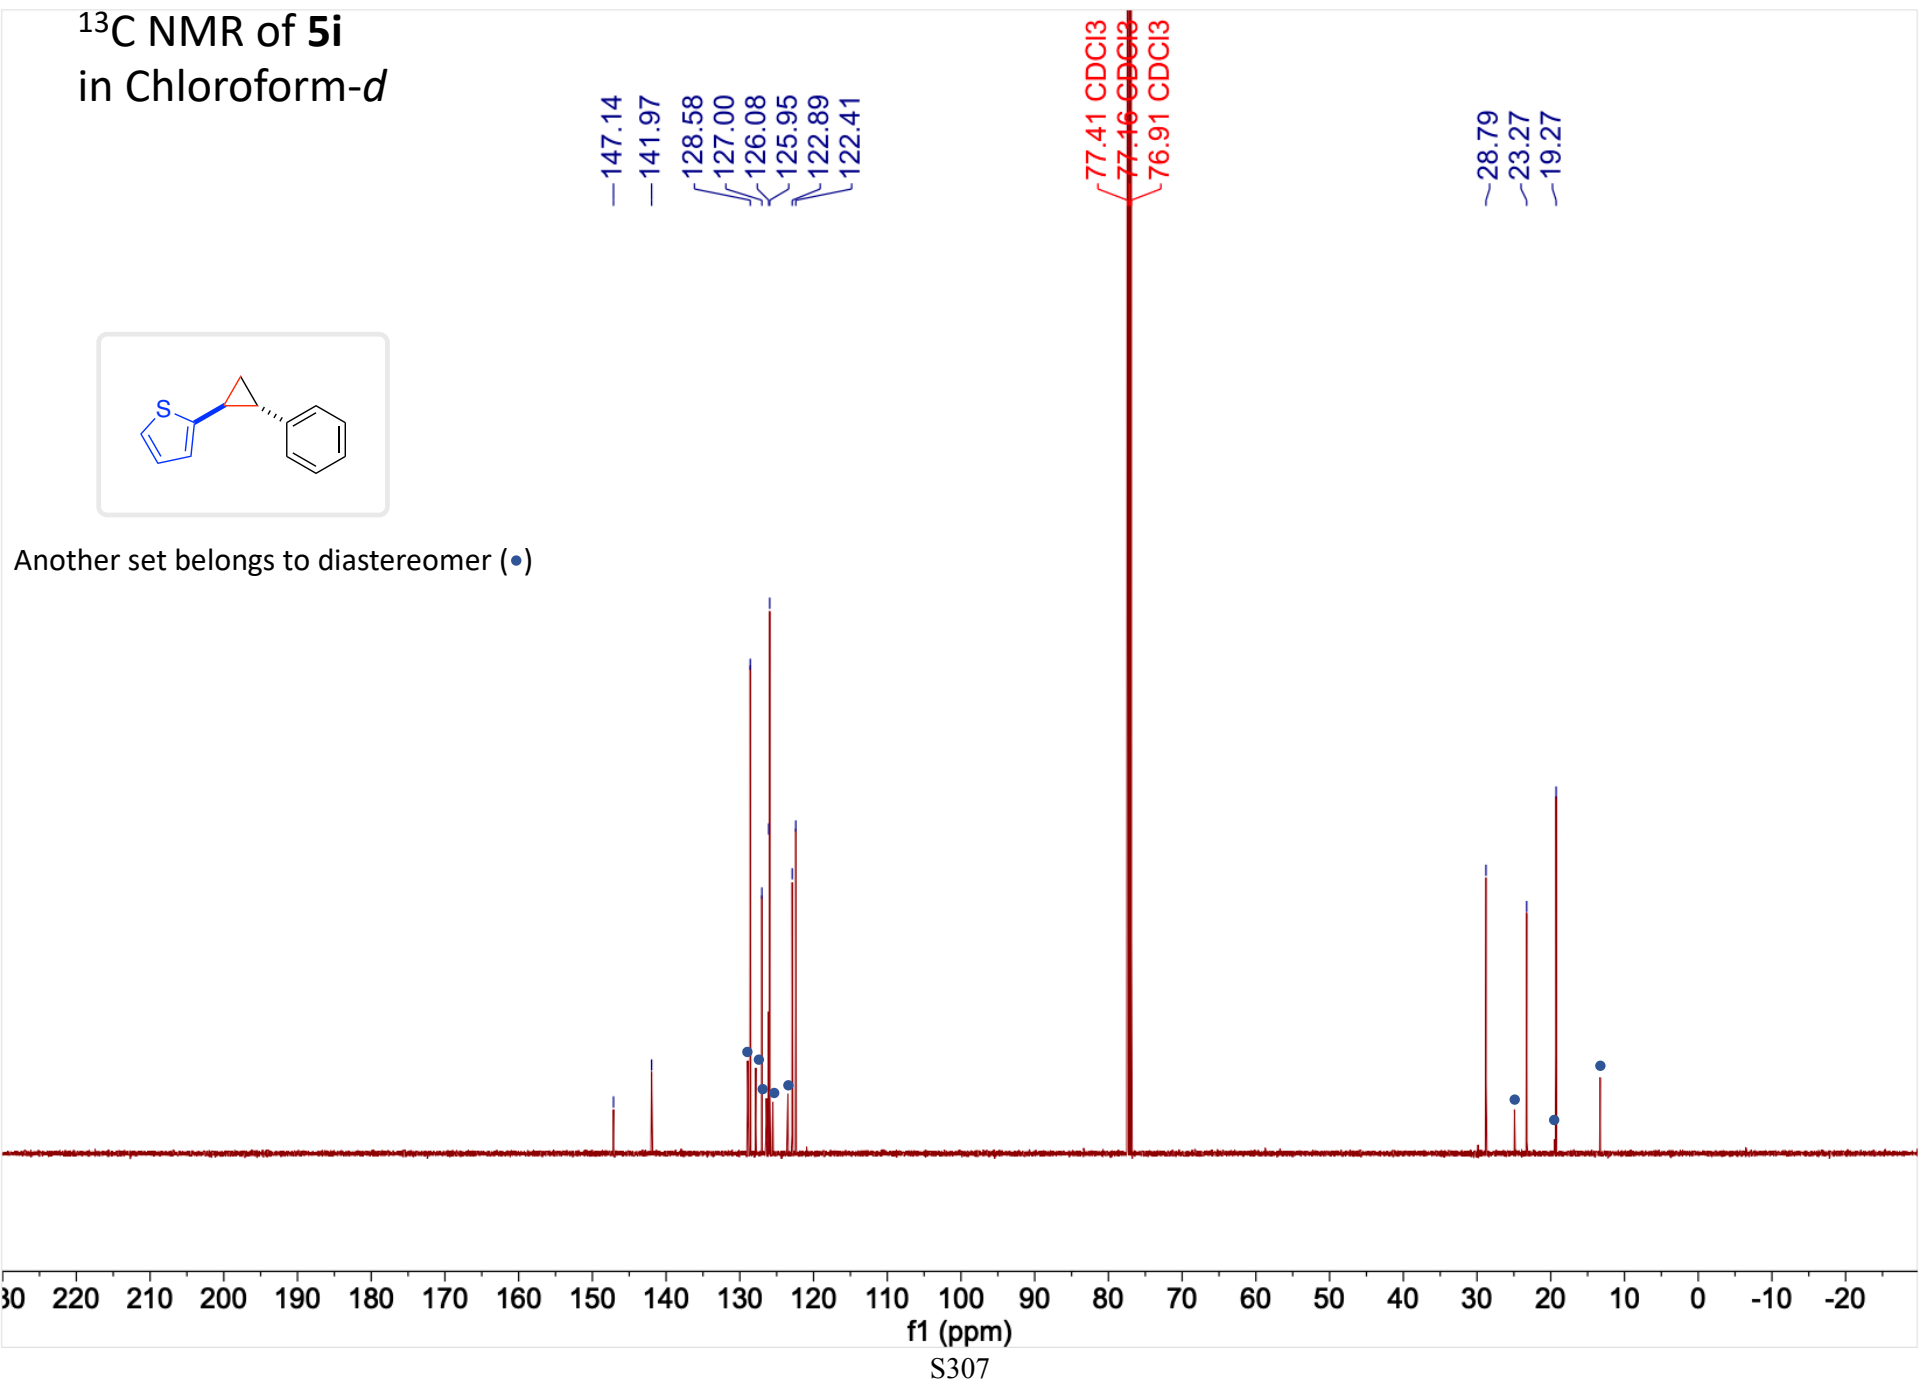

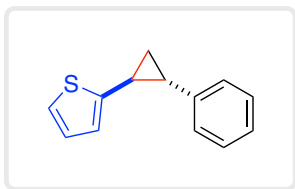

# HPLC of 5i

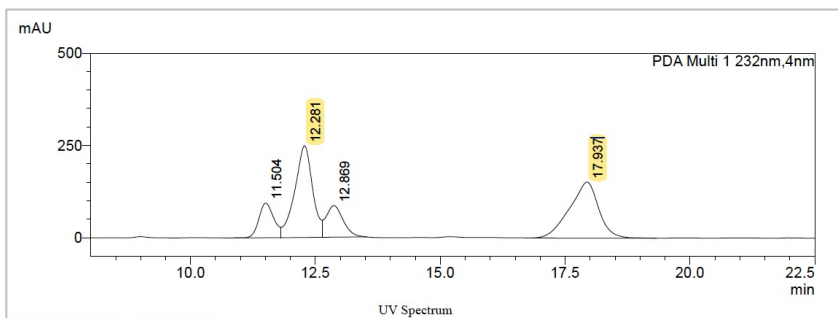

WCL-2381-OJH-2%0.8mL002\_002.lcd

UV Spectrum

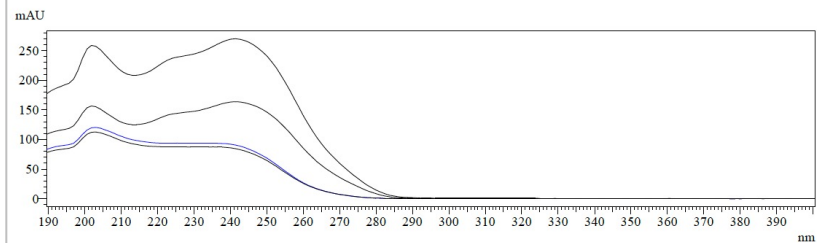

Peak Table  
PDA Ch1 232nm

| Peak# | Ret. Time | Area%   |
|-------|-----------|---------|
| 1     | 11.504    | 11.933  |
| 2     | 12.281    | 37.837  |
| 3     | 12.869    | 12.427  |
| 4     | 17.937    | 37.803  |
| Total |           | 100.000 |

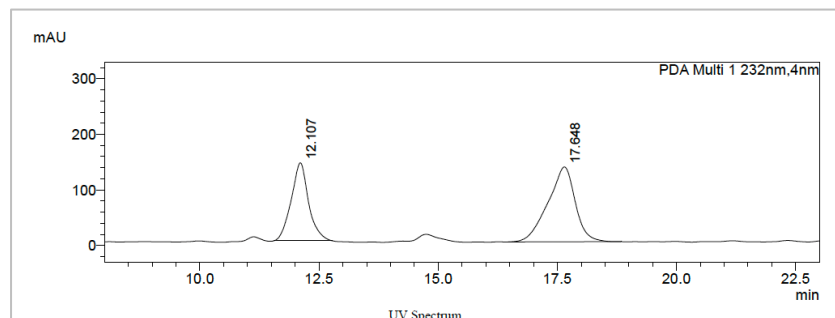

UV Spectrum

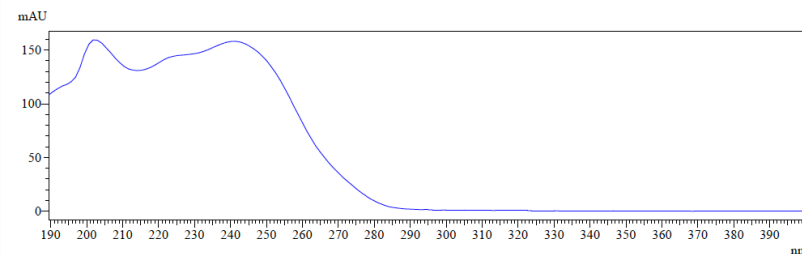

Peak Table  
PDA Ch1 232nm

| Peak# | Ret. Time | Area%   |
|-------|-----------|---------|
| 1     | 12.107    | 39.821  |
| 2     | 17.648    | 60.179  |
| Total |           | 100.000 |

<sup>1</sup>H NMR of **5j**  
in Chloroform-*d*

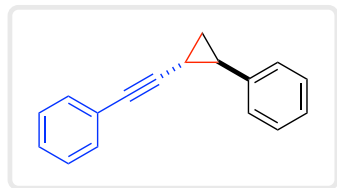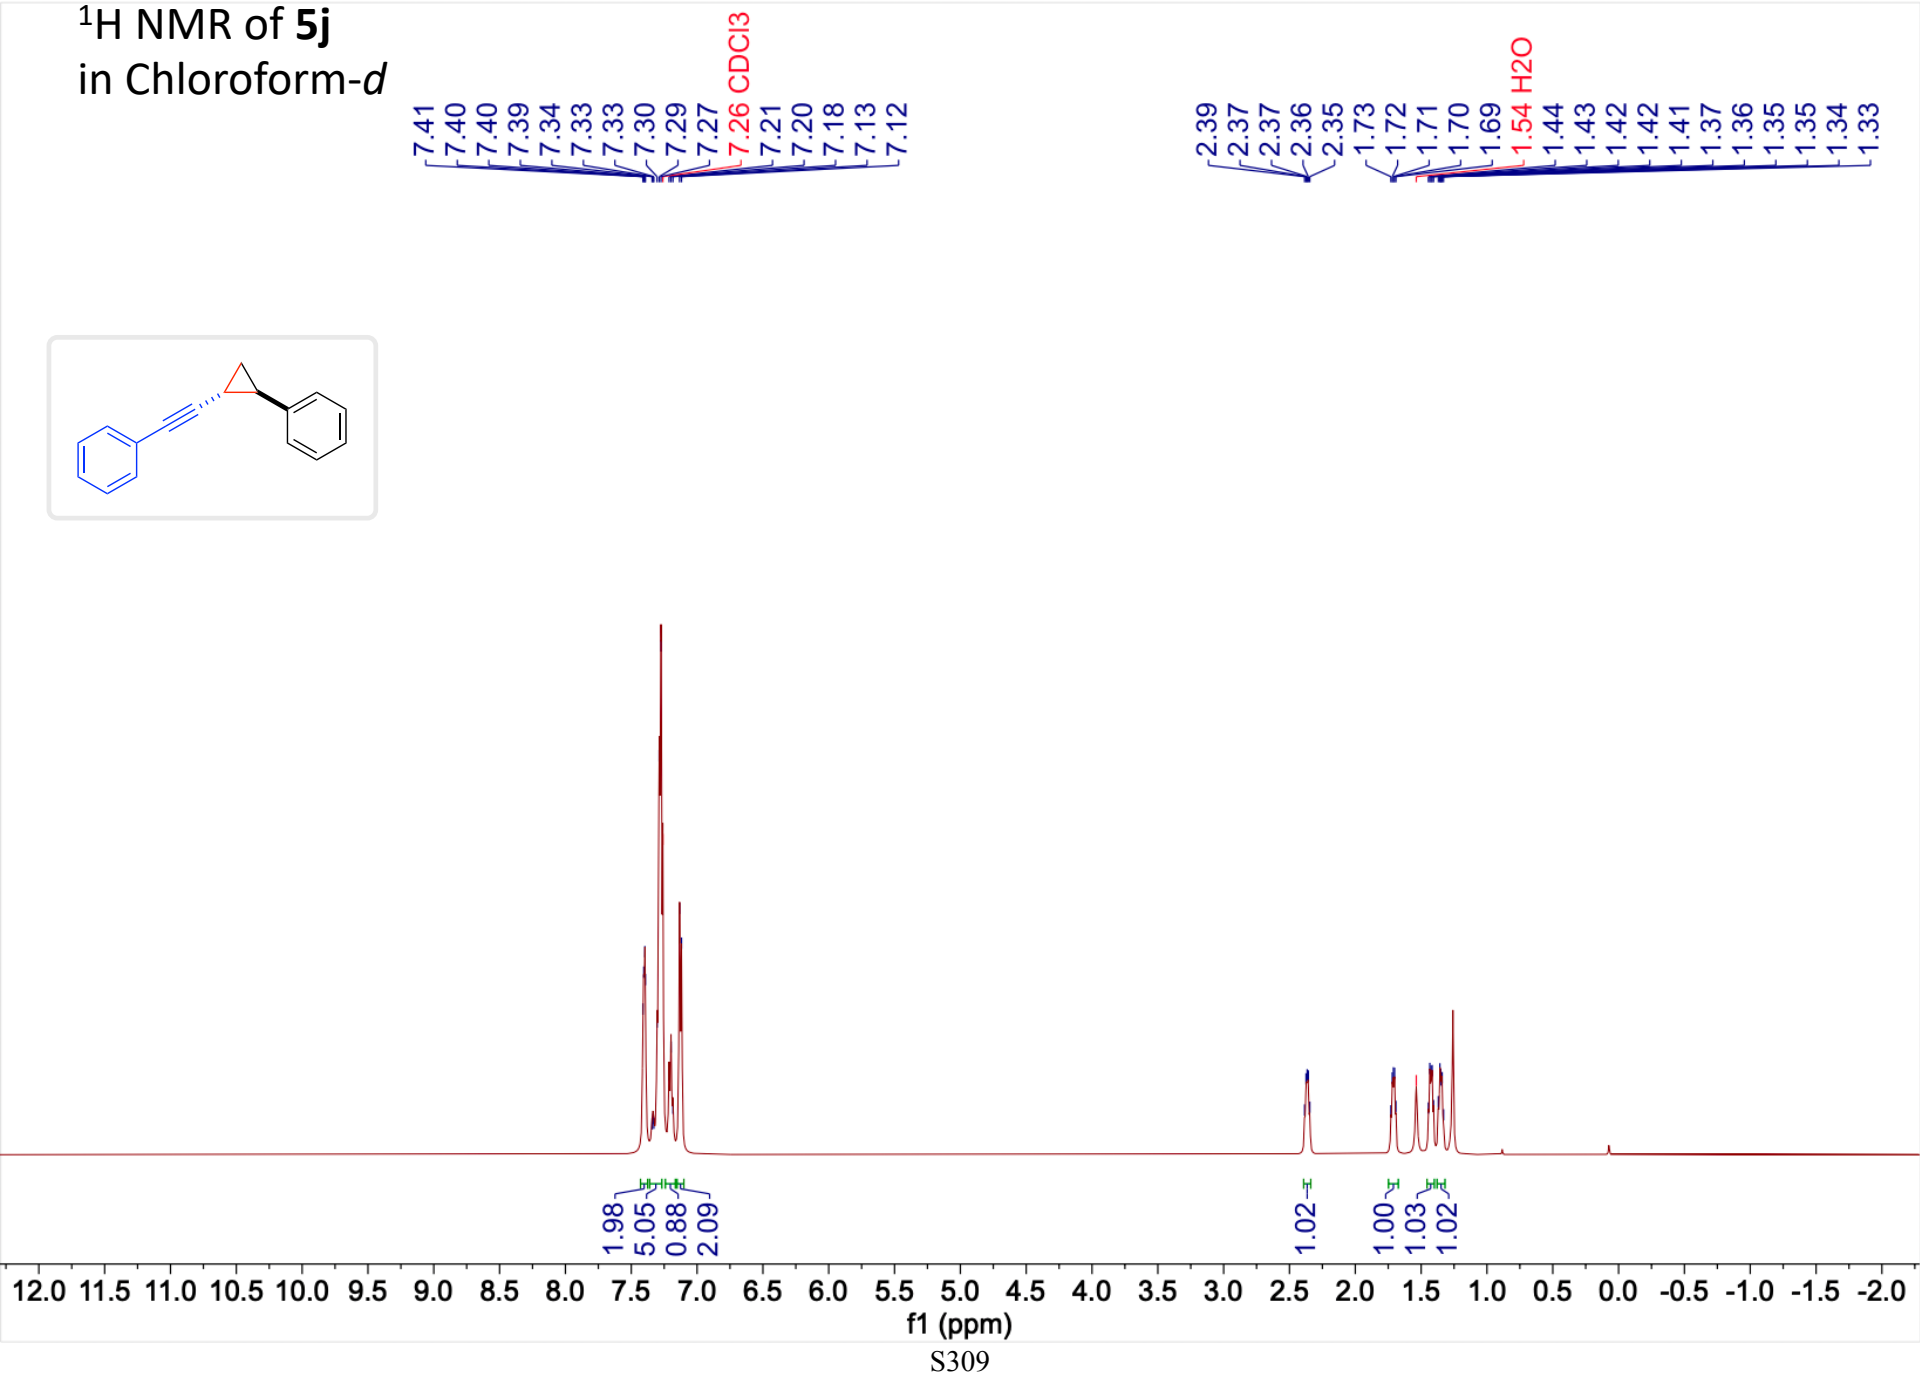

$^{13}\text{C}$  NMR of **5j**  
in Chloroform-*d*

— 140.90  
— 131.77  
— 128.59  
— 128.36  
— 127.77  
— 126.39  
— 126.13  
— 123.85

— 92.05

77.41 CDCl<sub>3</sub>  
77.37  
77.16 CDCl<sub>3</sub>  
76.91 CDCl<sub>3</sub>

— 26.74

— 18.18

— 12.23

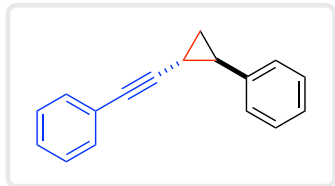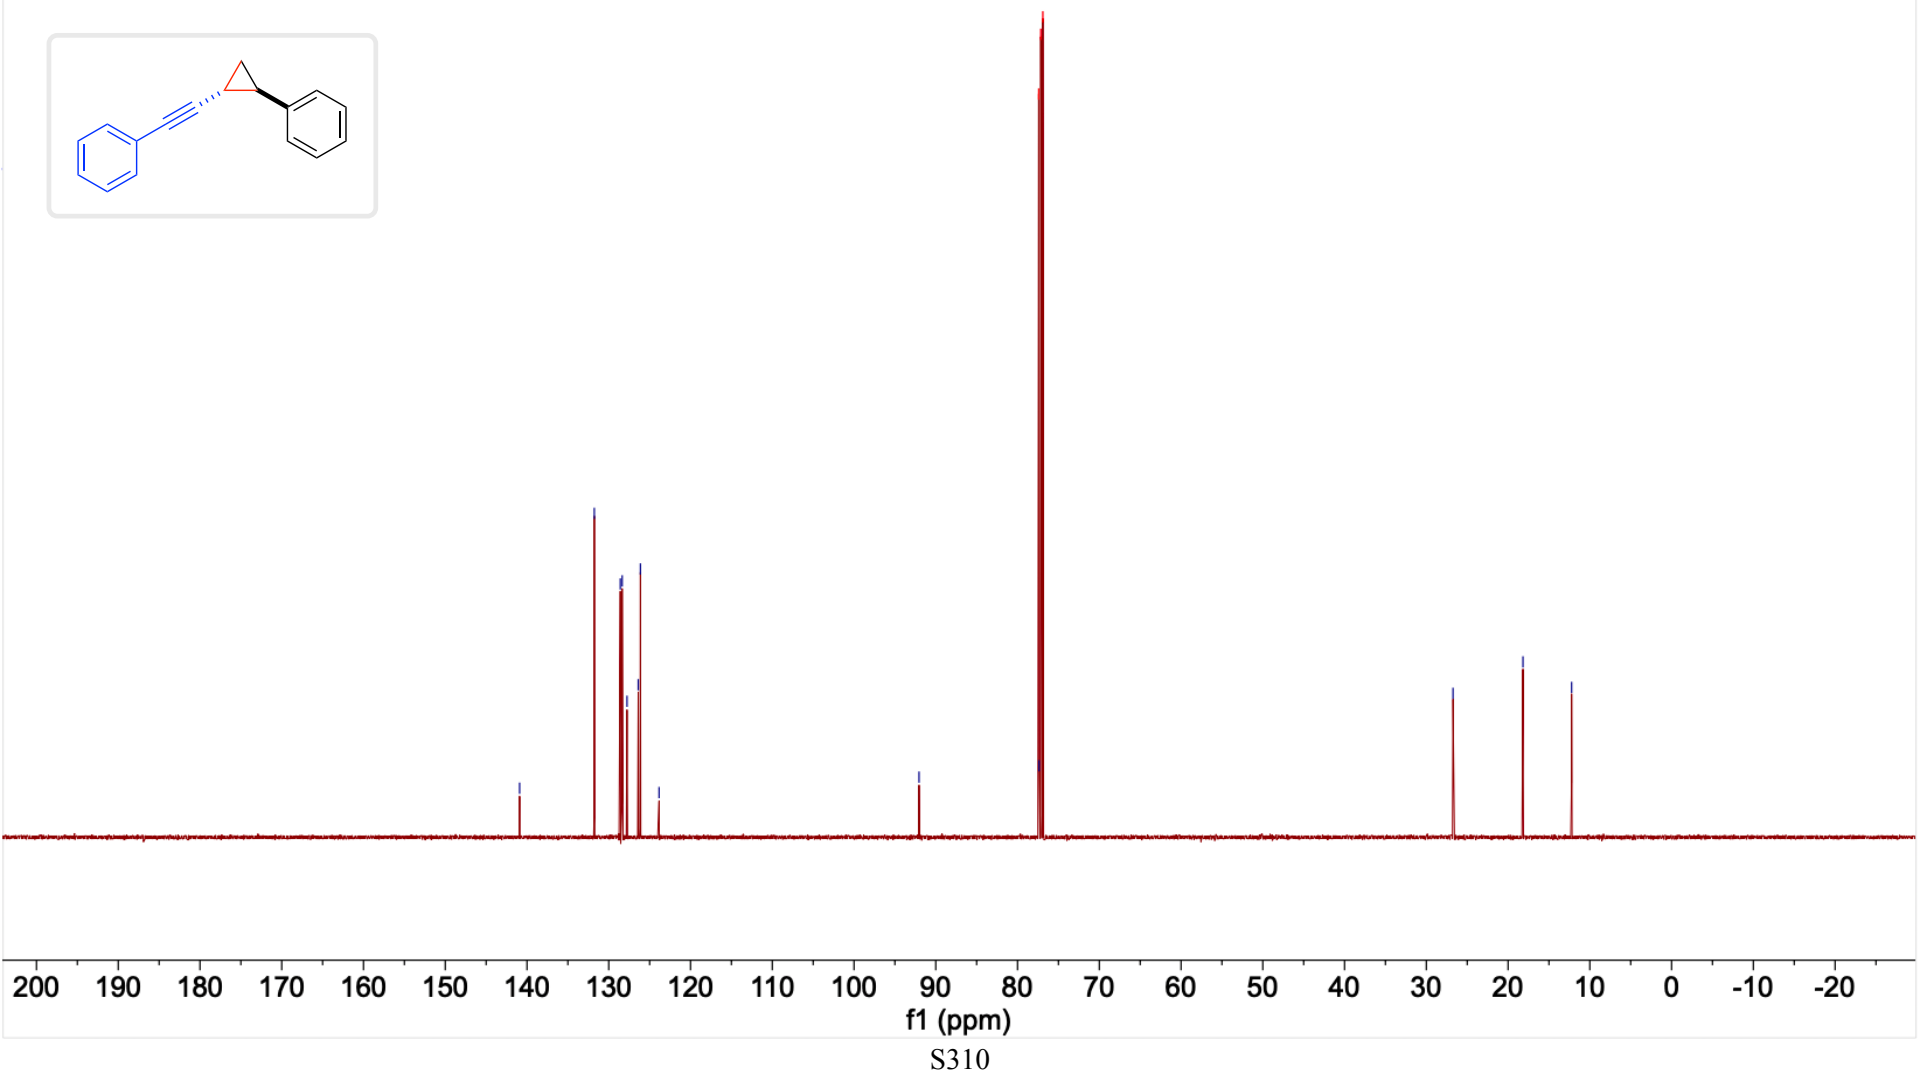

f1 (ppm)

S310

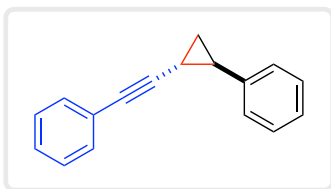

# HPLC of 5j

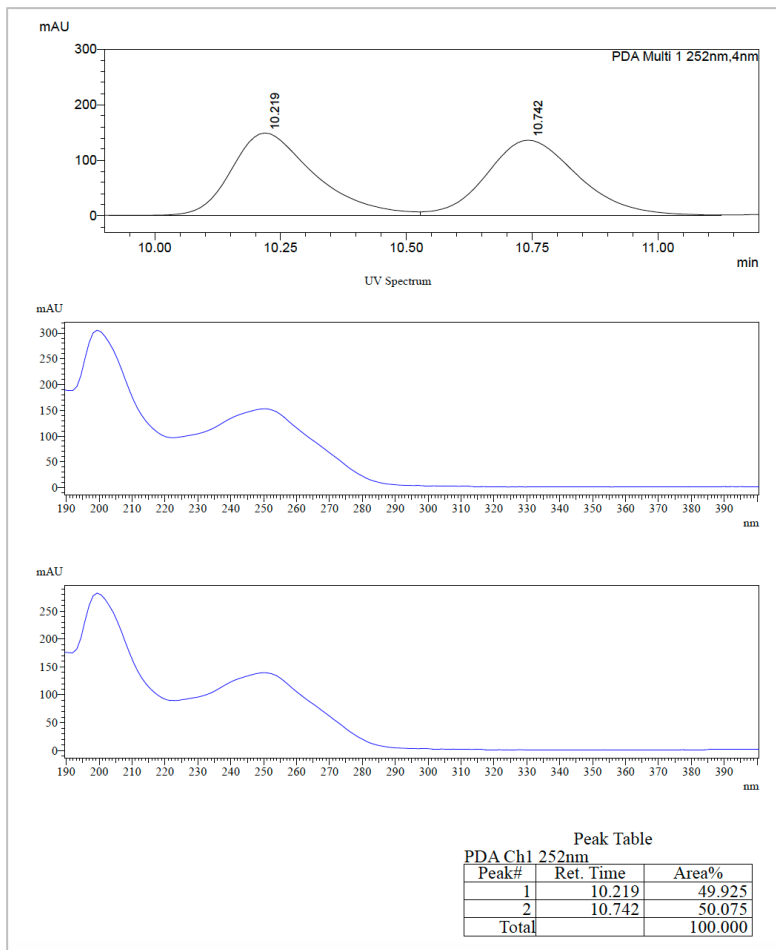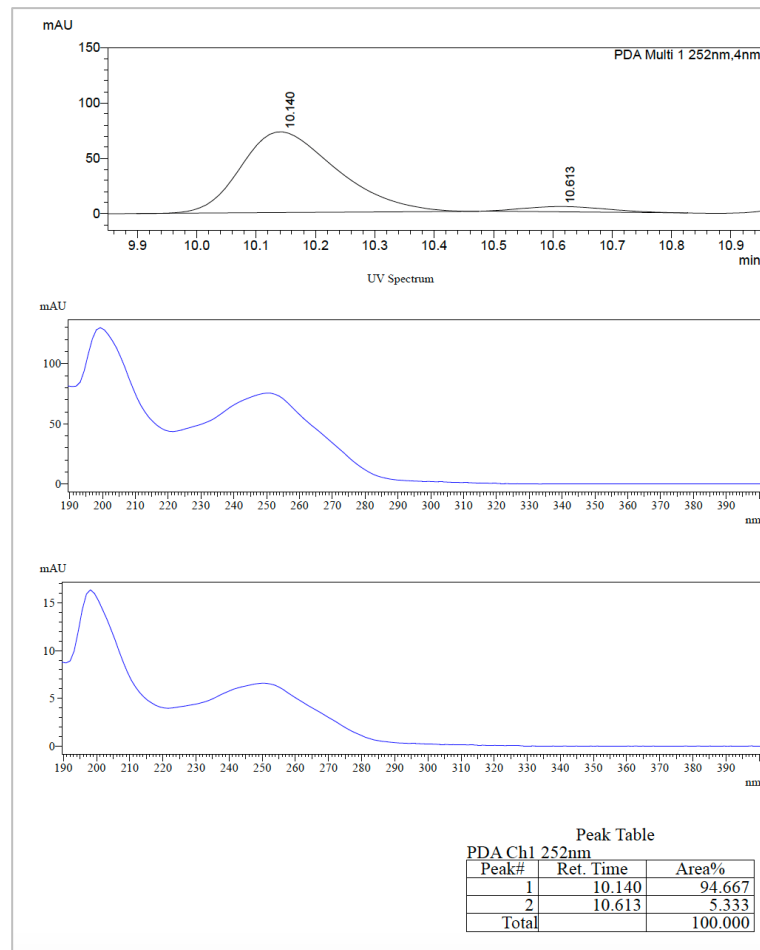



<sup>1</sup>H NMR of **5k**  
in Chloroform-*d*

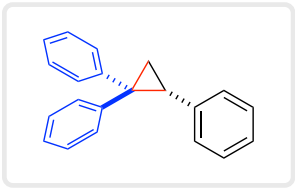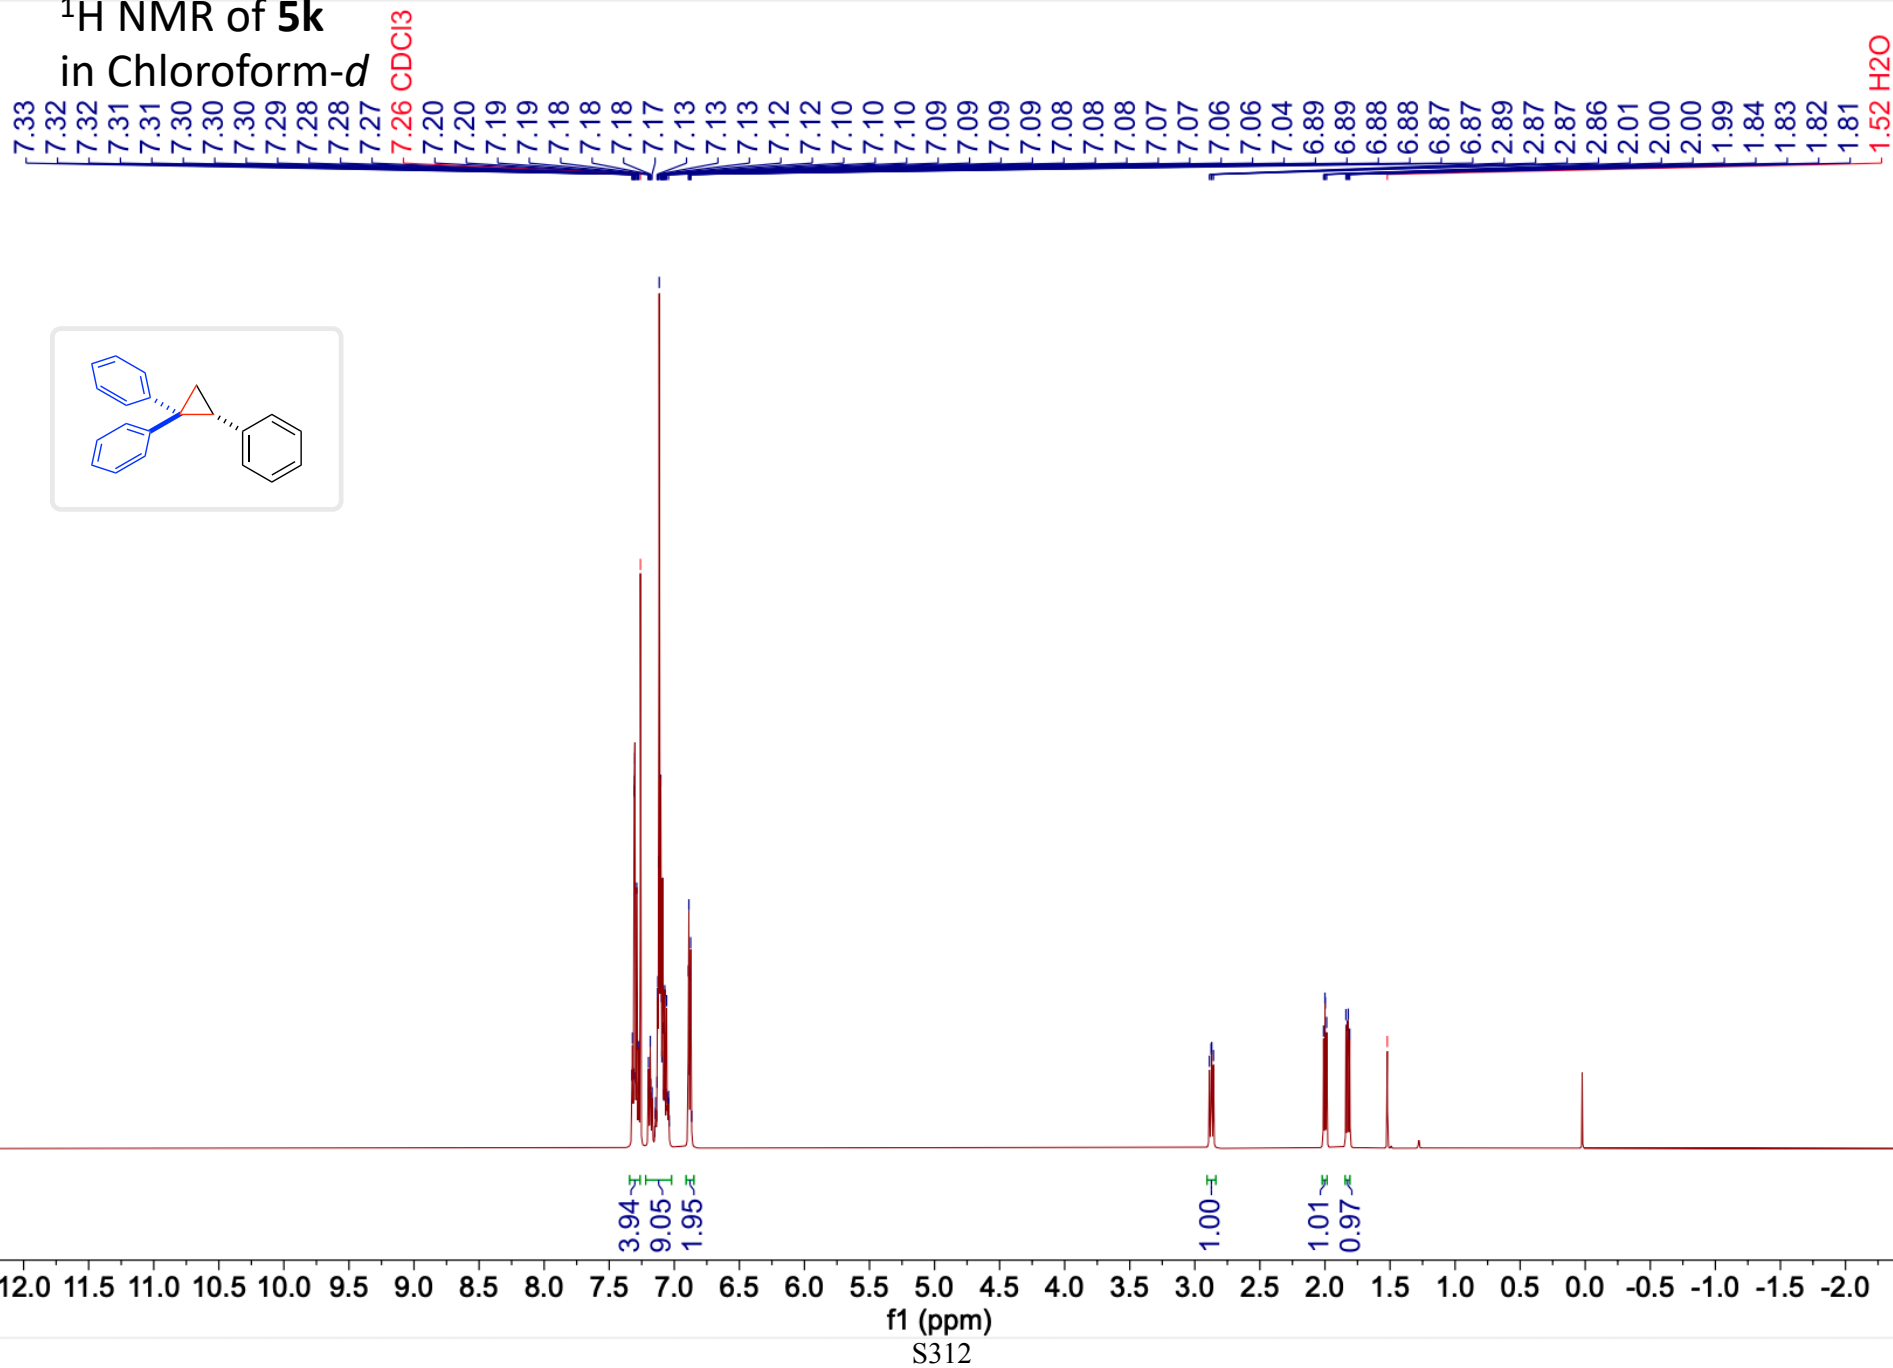

$^{13}\text{C}$  NMR of **5k**  
in Chloroform-*d*

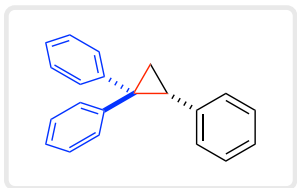

147.15  
140.34  
138.84  
131.32  
128.48  
128.07  
128.05  
127.77  
127.56  
126.37  
126.04  
125.72

77.41 CDC13  
77.16 CDC13  
76.91 CDC13

39.46

32.53

21.02

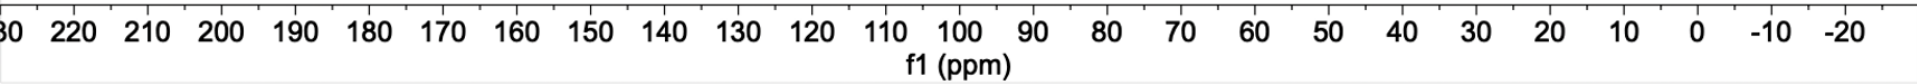

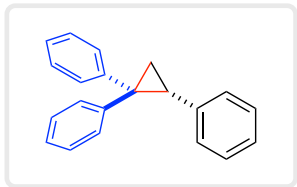

# HPLC of 5k

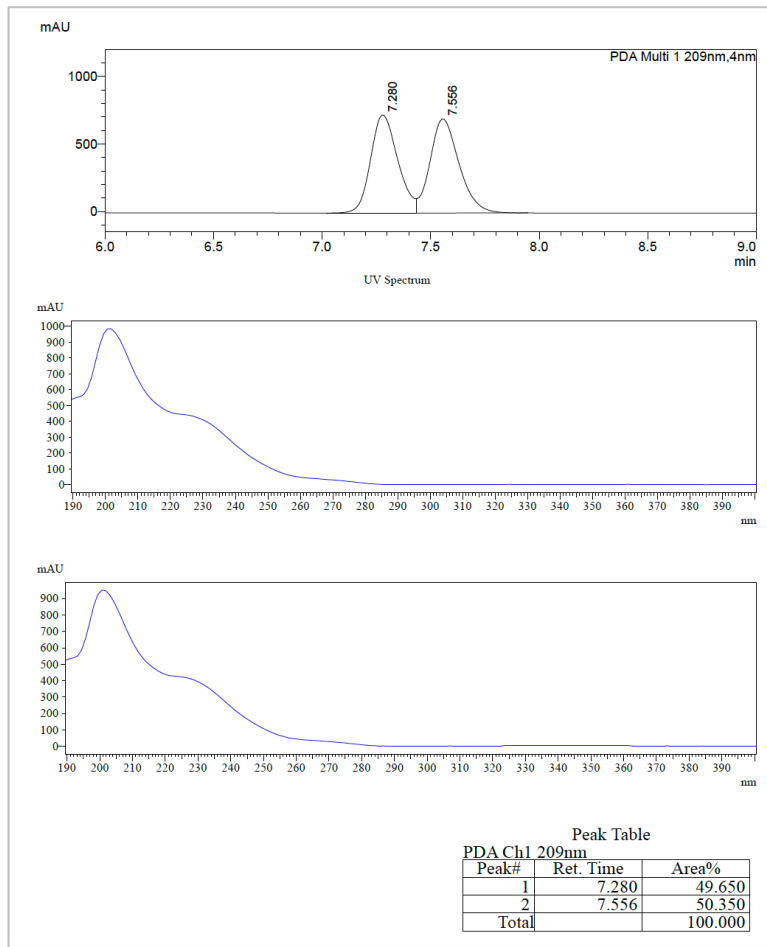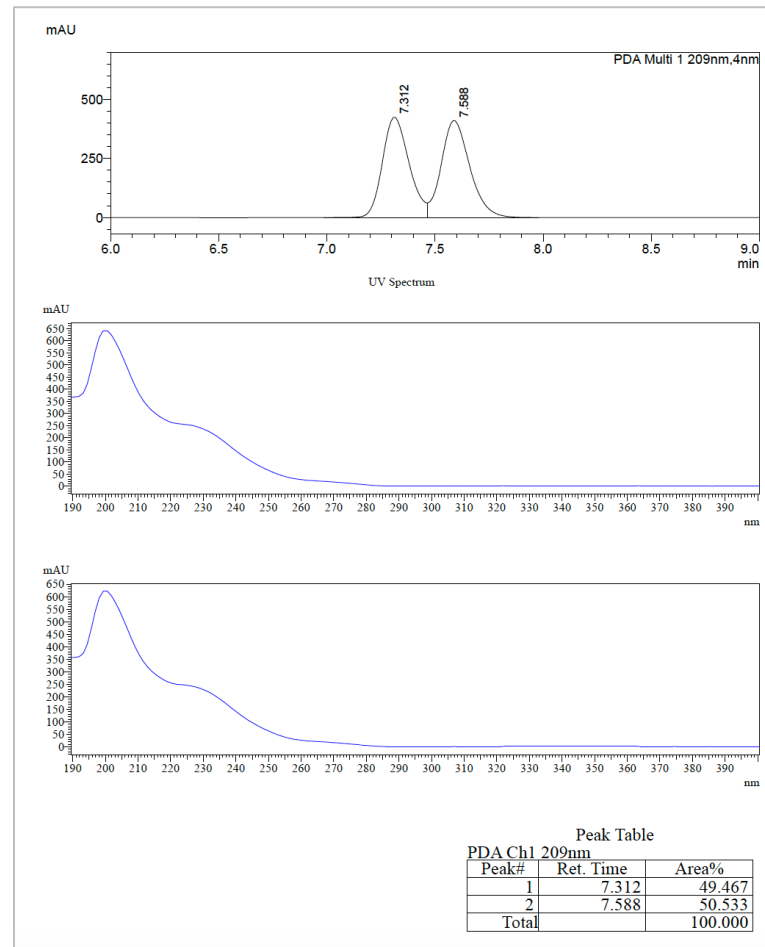

<sup>1</sup>H NMR of **8**  
in Chloroform-*d*

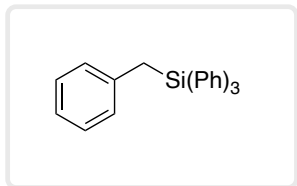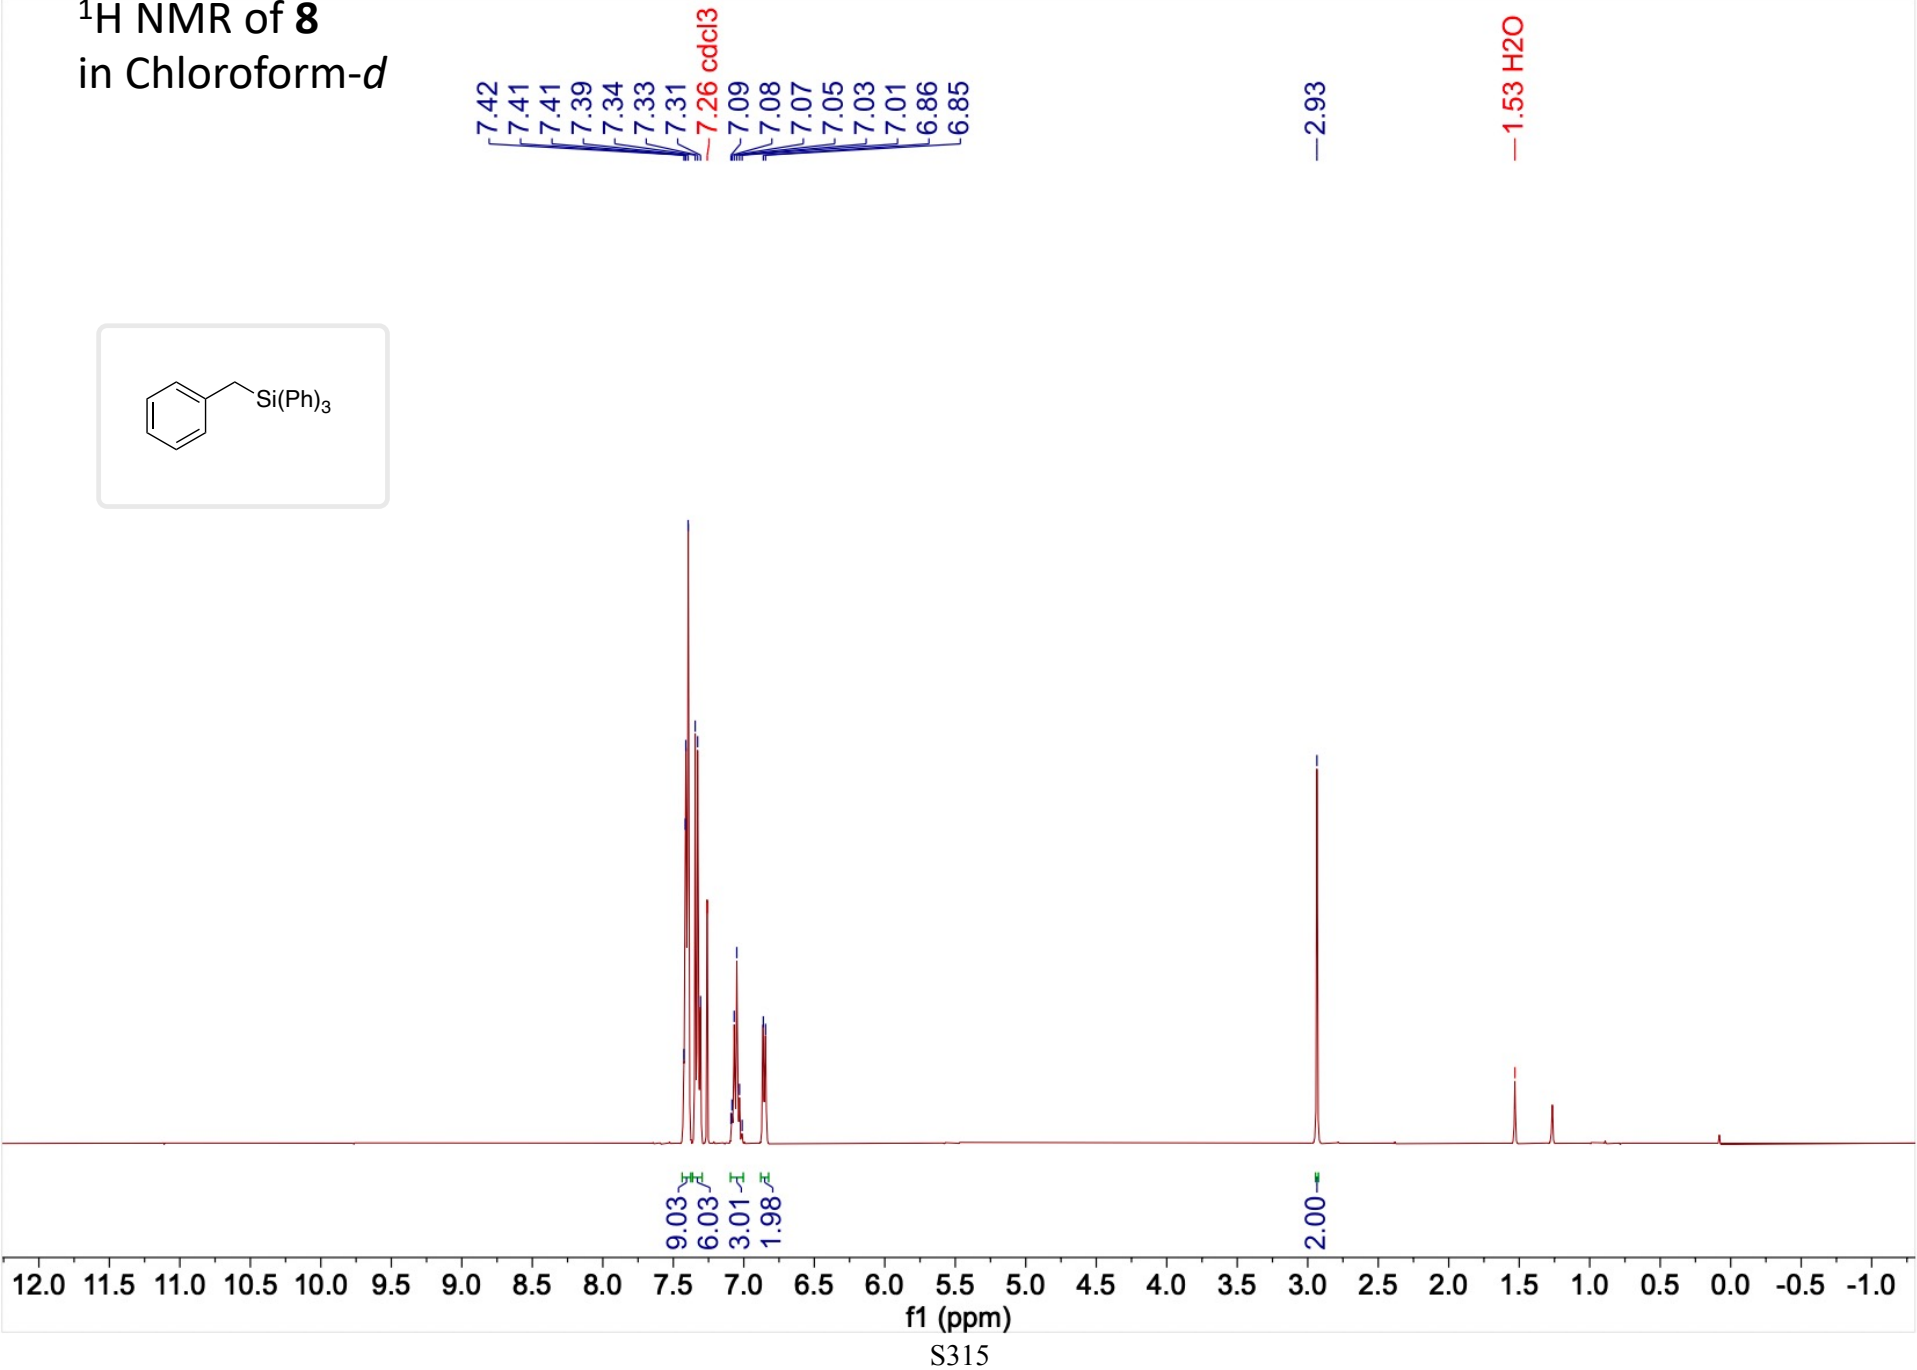

$^{13}\text{C}$  NMR of **8**  
in Chloroform-*d*

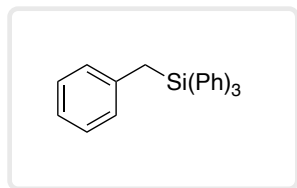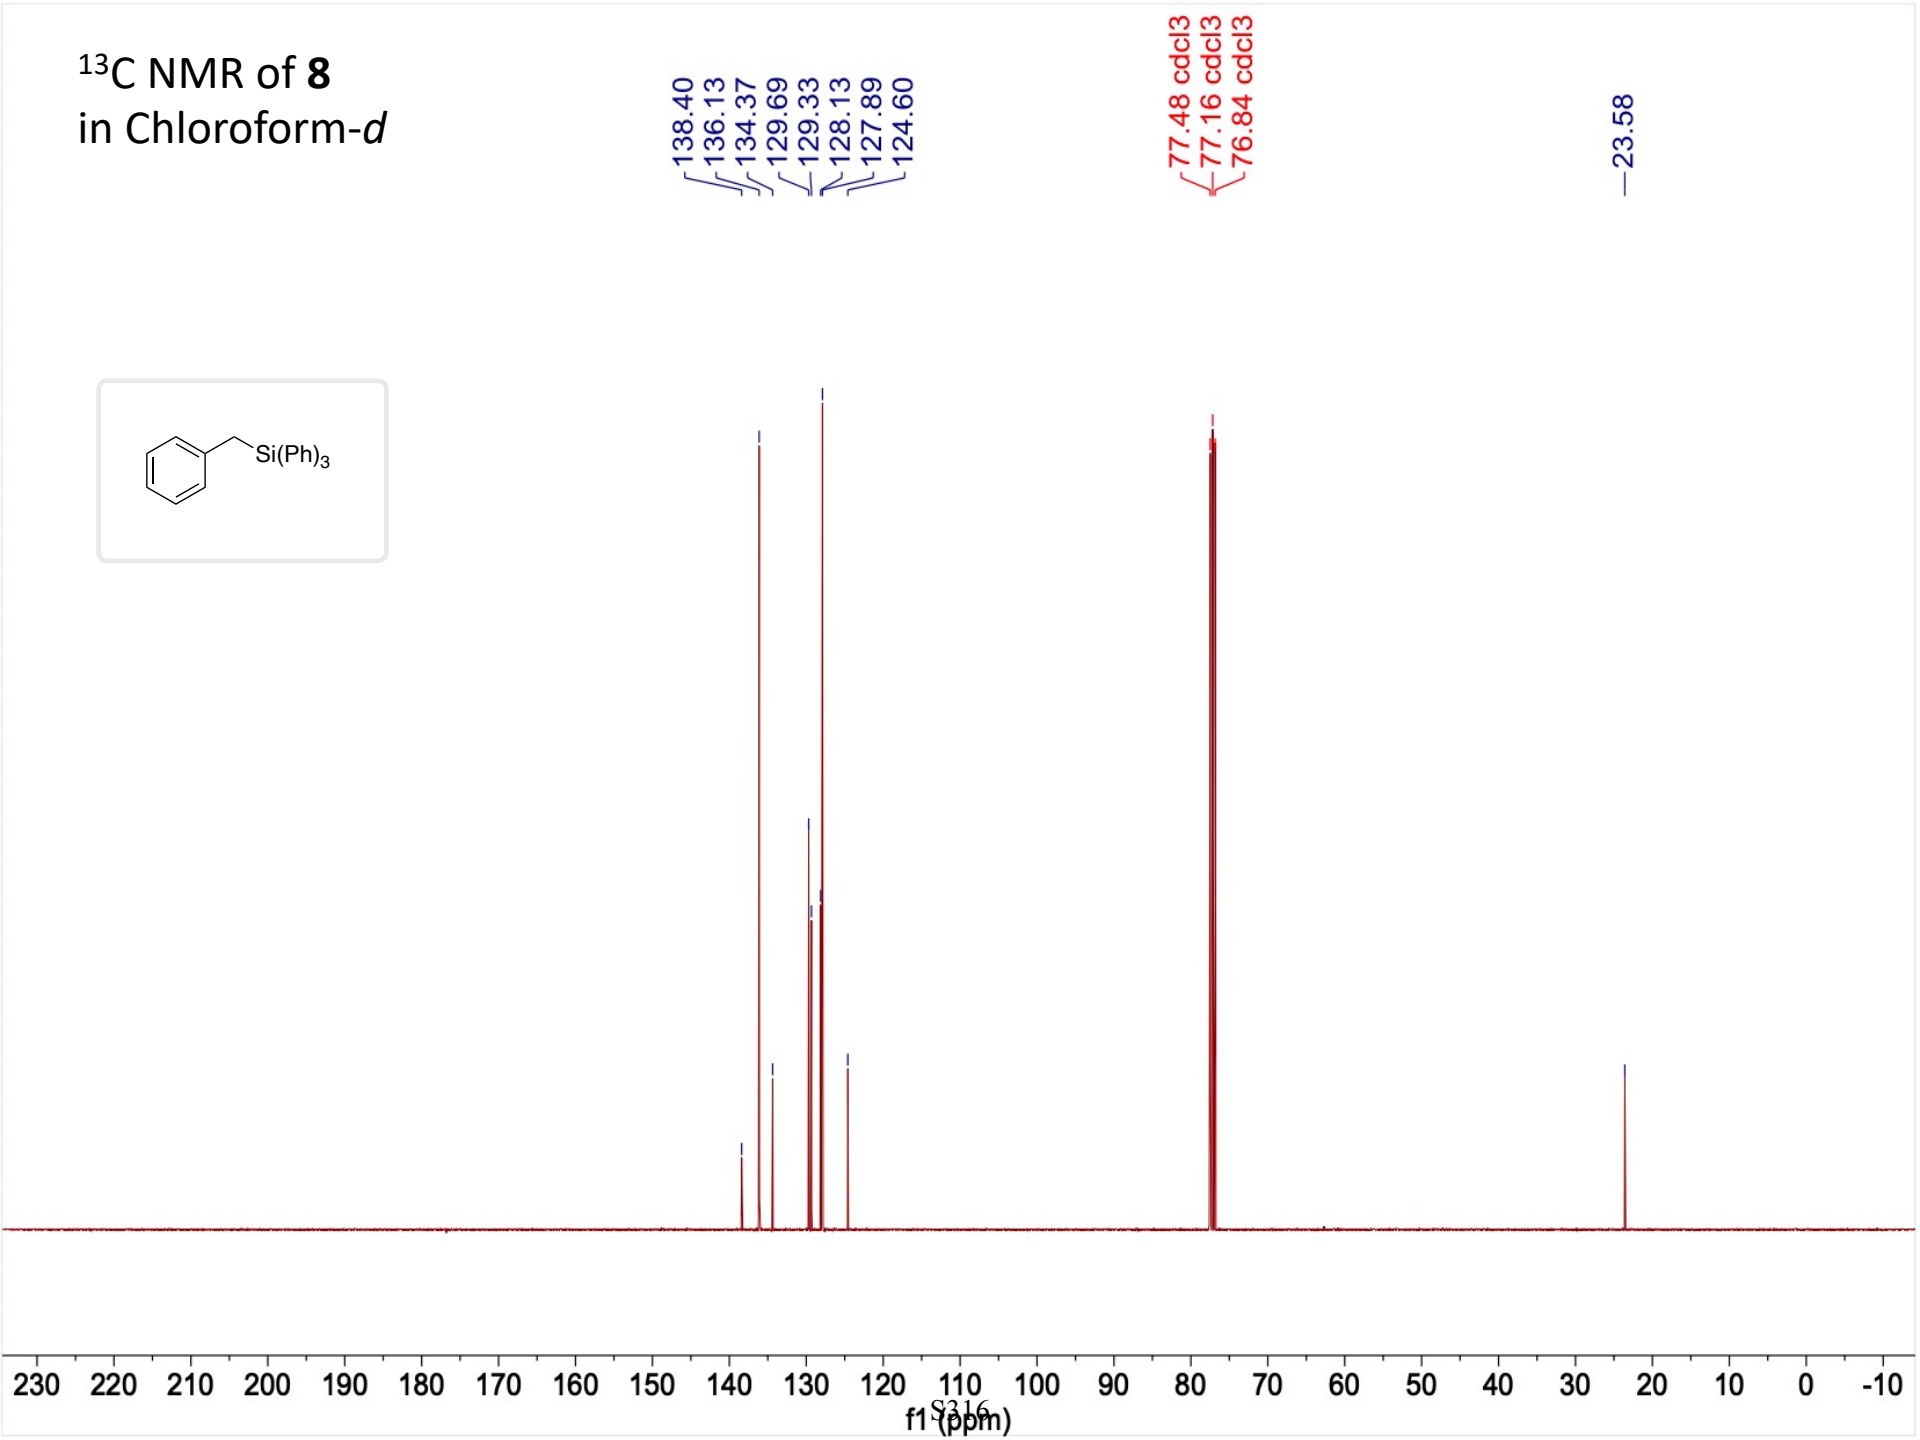

<sup>1</sup>H NMR of **8'**  
in Chloroform-*d*

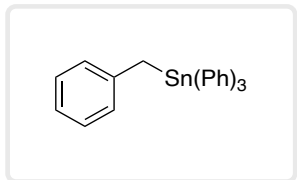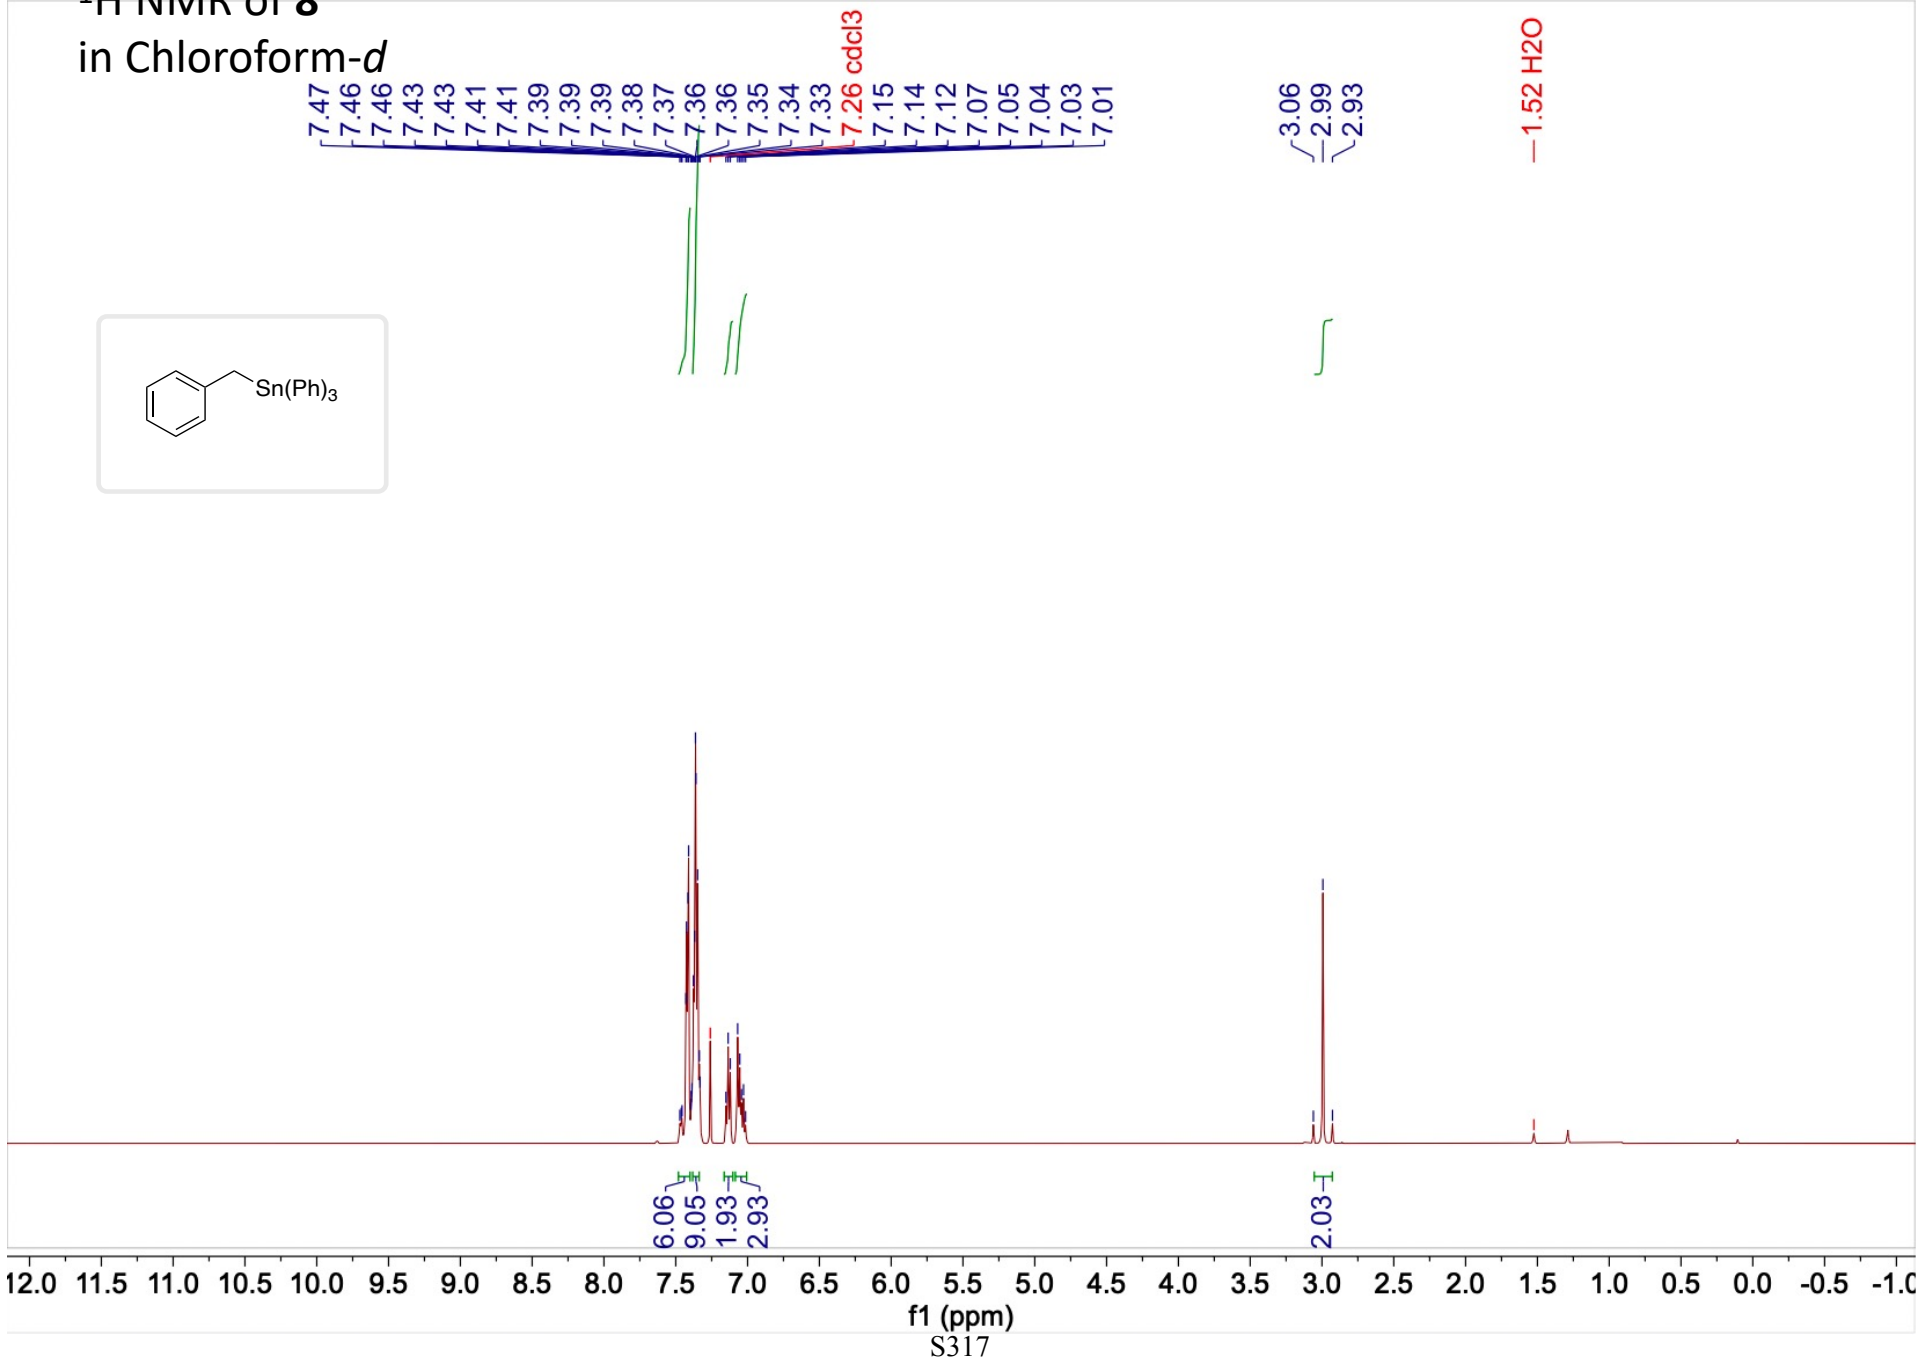

$^{13}\text{C}$  NMR of **8'**  
in Chloroform-*d*

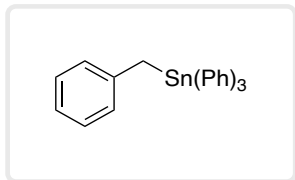

140.78  
138.44  
137.20  
129.12  
128.60  
128.55  
127.97  
124.08

77.48 cdcl3  
77.16 cdcl3  
76.84 cdcl3

-20.18

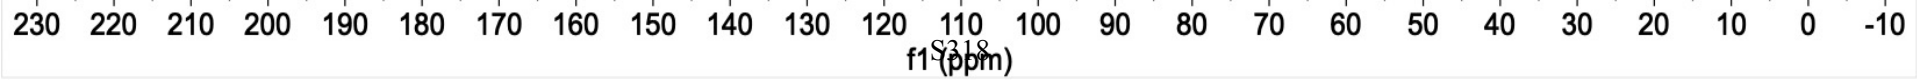

<sup>1</sup>H NMR of **9**  
in Chloroform-*d*

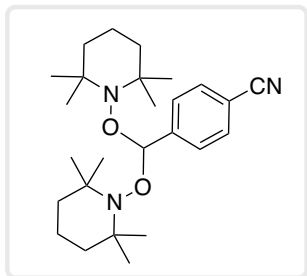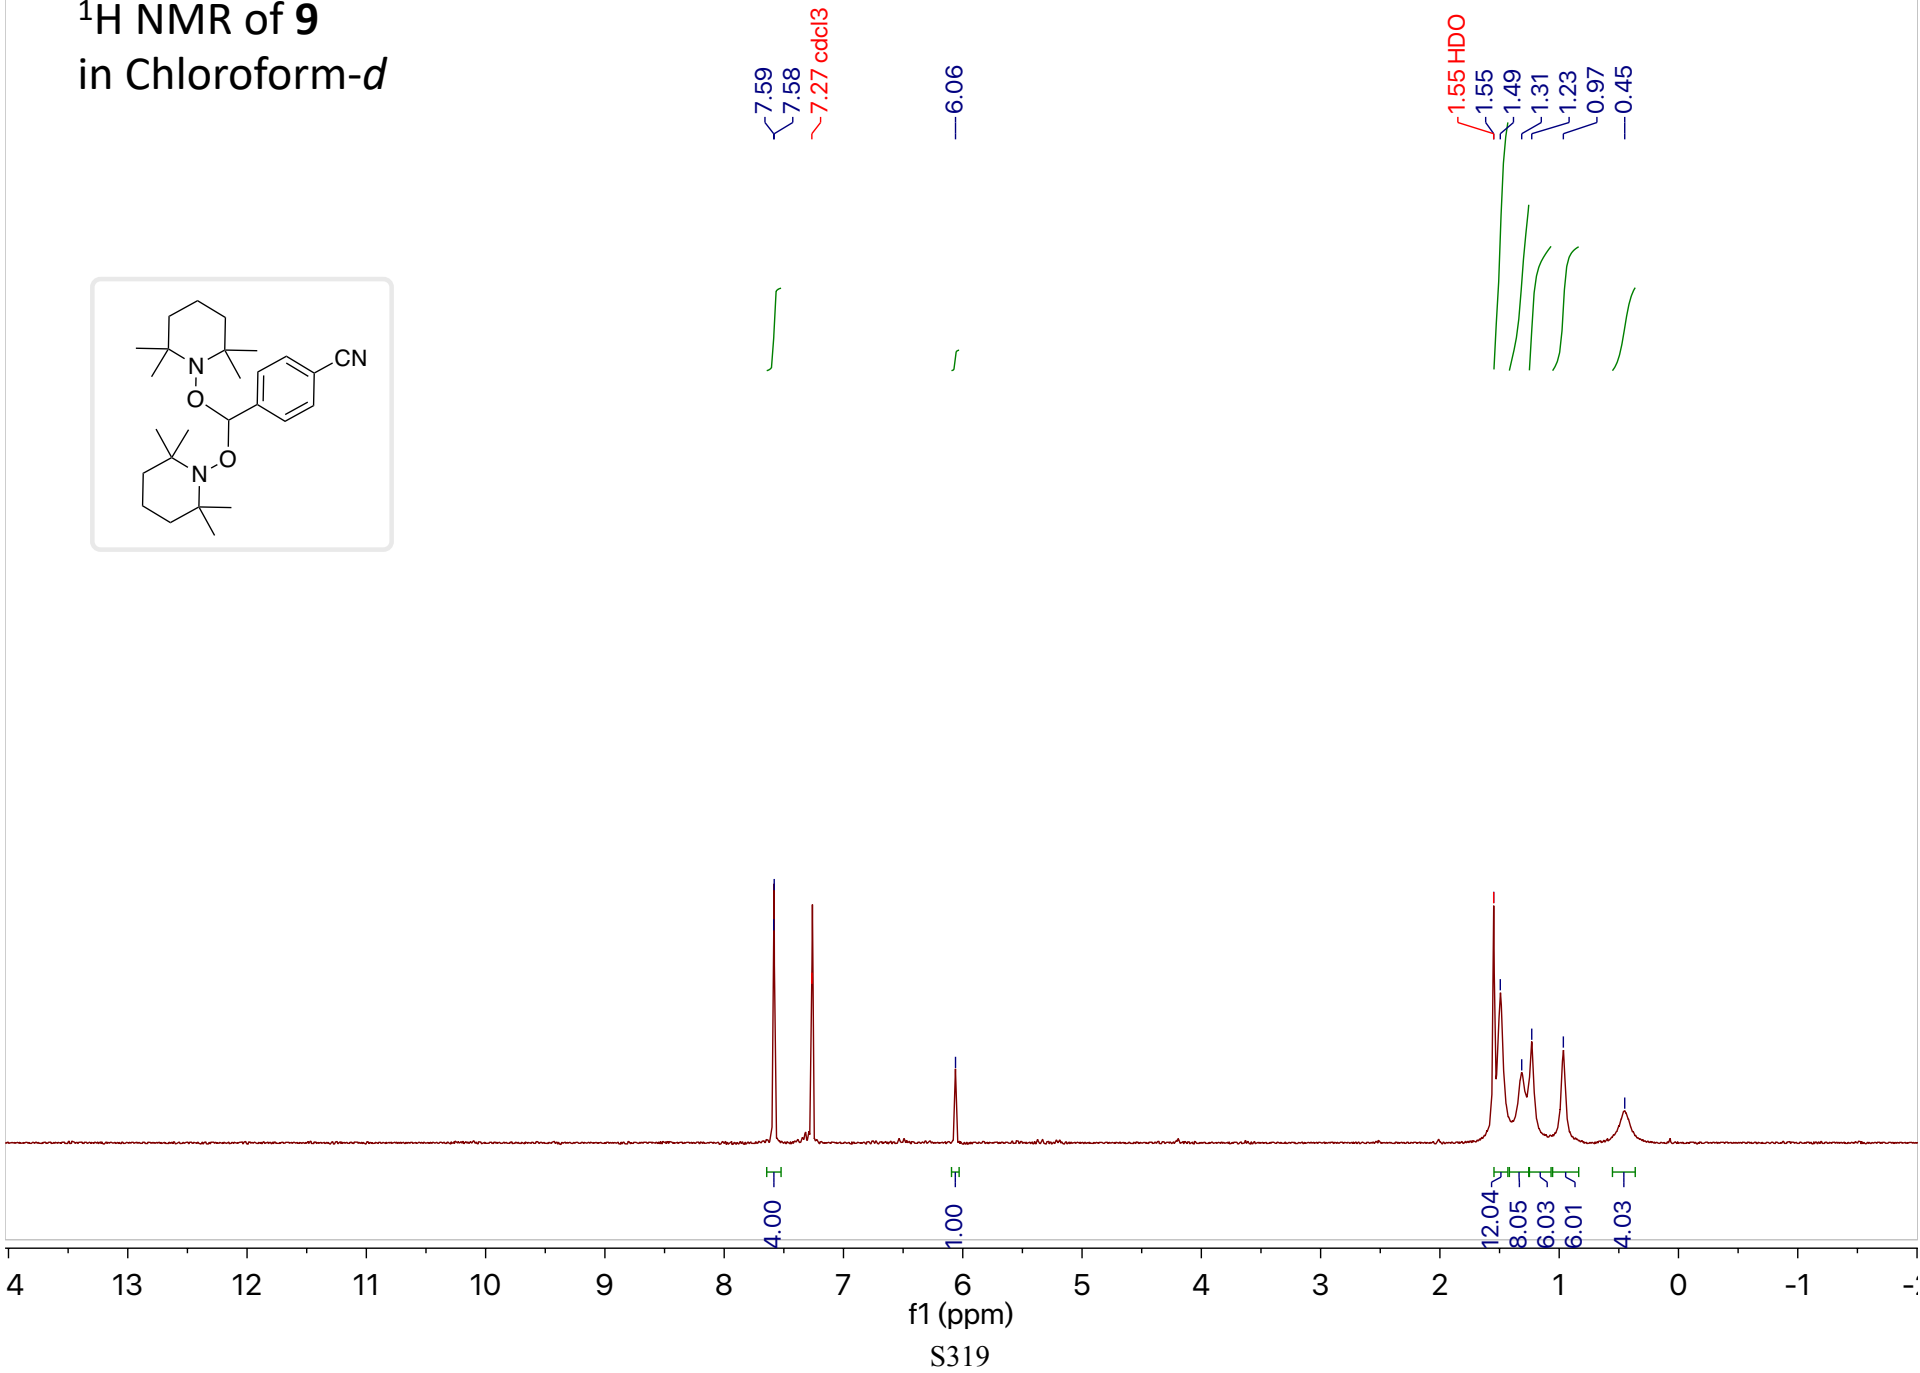



<sup>13</sup>C NMR of **9**  
in Chloroform-*d*

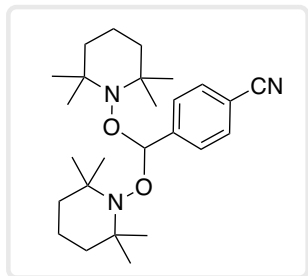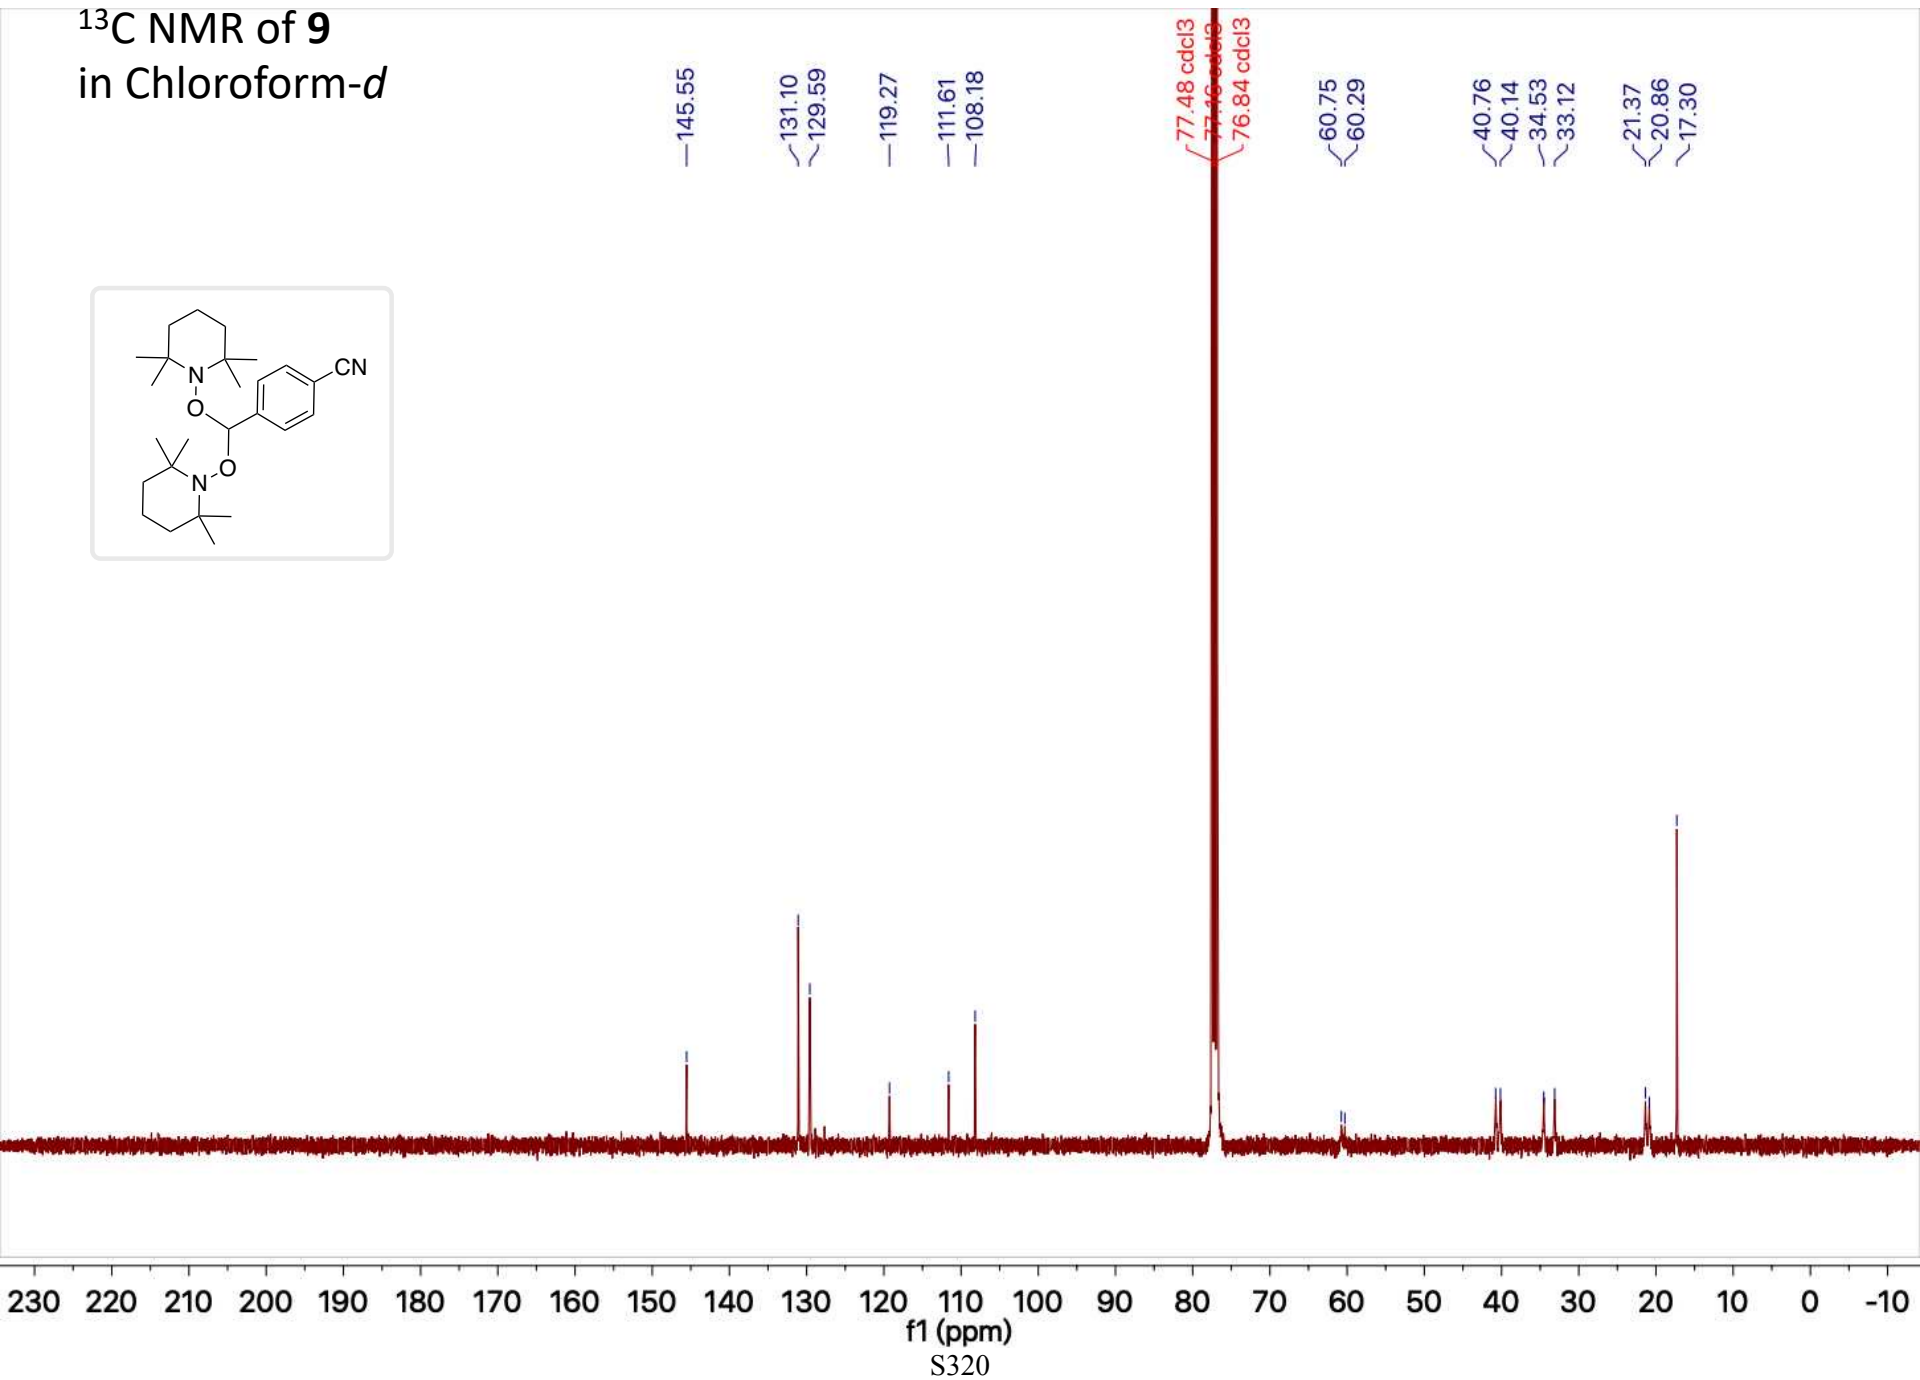

Supplement: NIHMS1934749-supplement-Supplementary_Materials_for_Manuscript.pdf [file NIHMS1934749-supplement-Supplementary_Materials_for_Manuscript.pdf]
